# Supplementary material for: The Differences in Local Translatome across Distinct Neuron Types Is Mediated by Both Baseline Cellular Differences and Post-transcriptional Mechanisms
Source: eNeuro. 2019 Feb 4;5(6):ENEURO.0320-18.2018. doi: 10.1523/ENEURO.0320-18.2018 (PMC6361723; doi:10.1523/ENEURO.0320-18.2018)
Supplement: Figure 2-2 — Table of differential expression results between TRAP and WCH of VGAT-TRAP. Genes with transcripts enriched in VGAT-TRAP cells over background. Column names are as in Figure 2-1. Download Figure 2-2, XLS file. [file sup_enu-eN-NWR-0320-18-s03.xls]

## Sheet: Supplemental Table 2 Rough - tr
ensembl_gene_id	entrezgene	external_gene_name	description	logFC	logCPM	LR	PValue	FDR
ENSMUSG00000071234	627191	Syndig1l	synapse differentiation inducing 1 like [Source:MGI Symbol;Acc:MGI:2685107]	2.84053	6.20809	304.331	3.75148e-68	6.24022e-64
ENSMUSG00000041911	13390	Dlx1	distal-less homeobox 1 [Source:MGI Symbol;Acc:MGI:94901]	2.83156	5.02224	275.851	6.02363e-62	5.00985e-58
ENSMUSG00000062309	102614	Rpp25	ribonuclease P/MRP 25 subunit [Source:MGI Symbol;Acc:MGI:2143151]	3.28596	5.4721	252.231	8.47538e-57	4.69932e-53
ENSMUSG00000032946	19395	Rasgrp2	RAS, guanyl releasing protein 2 [Source:MGI Symbol;Acc:MGI:1333849]	2.68695	4.23266	247.294	1.00995e-55	4.19987e-52
ENSMUSG00000045777	320802	Ifitm10	interferon induced transmembrane protein 10 [Source:MGI Symbol;Acc:MGI:2444776]	2.62596	4.59509	240.438	3.15694e-54	1.05025e-50
ENSMUSG00000068859	381373	Sp9	trans-acting transcription factor 9 [Source:MGI Symbol;Acc:MGI:3574660]	2.81215	3.91387	239.693	4.58846e-54	1.27208e-50
ENSMUSG00000031837	117148	Necab2	N-terminal EF-hand calcium binding protein 2 [Source:MGI Symbol;Acc:MGI:2152211]	2.51791	5.92886	222.798	2.2188e-50	4.84162e-47
ENSMUSG00000038370	66425	Pcp4l1	Purkinje cell protein 4-like 1 [Source:MGI Symbol;Acc:MGI:1913675]	3.20267	7.93543	222.702	2.32854e-50	4.84162e-47
ENSMUSG00000026890	16874	Lhx6	LIM homeobox protein 6 [Source:MGI Symbol;Acc:MGI:1306803]	2.77837	5.31999	203.096	4.40712e-46	8.14533e-43
ENSMUSG00000075702	114679	Selenom	selenoprotein M [Source:MGI Symbol;Acc:MGI:2149786]	2.61182	6.16516	201.563	9.52067e-46	1.58367e-42
ENSMUSG00000000214	21823	Th	tyrosine hydroxylase [Source:MGI Symbol;Acc:MGI:98735]	3.06023	3.40251	200.919	1.31592e-45	1.98991e-42
ENSMUSG00000021680	12919	Crhbp	corticotropin releasing hormone binding protein [Source:MGI Symbol;Acc:MGI:88497]	3.01569	6.61479	198.509	4.41693e-45	6.1226e-42
ENSMUSG00000028464	22004	Tpm2	tropomyosin 2, beta [Source:MGI Symbol;Acc:MGI:98810]	3.1257	3.35705	197.013	9.36713e-45	1.19856e-41
ENSMUSG00000099083	223922	Atf7	activating transcription factor 7 [Source:MGI Symbol;Acc:MGI:2443472]	-2.13995	4.18312	191.203	1.73659e-43	2.06332e-40
ENSMUSG00000037771	22348	Slc32a1	solute carrier family 32 (GABA vesicular transporter), member 1 [Source:MGI Symbol;Acc:MGI:1194488]	2.76034	5.07341	187.326	1.2192e-42	1.35201e-39
ENSMUSG00000053519	70357	Kcnip1	Kv channel-interacting protein 1 [Source:MGI Symbol;Acc:MGI:1917607]	2.90101	6.57424	183.4	8.77051e-42	9.11804e-39
ENSMUSG00000031551	15930	Ido1	indoleamine 2,3-dioxygenase 1 [Source:MGI Symbol;Acc:MGI:96416]	3.49545	3.52074	181.348	2.46129e-41	2.4083e-38
ENSMUSG00000028971	12854	Cort	cortistatin [Source:MGI Symbol;Acc:MGI:109538]	3.88137	4.67066	180.588	3.60572e-41	3.33208e-38
ENSMUSG00000001280	20683	Sp1	trans-acting transcription factor 1 [Source:MGI Symbol;Acc:MGI:98372]	-2.12148	3.87771	178.851	8.63389e-41	7.55874e-38
ENSMUSG00000074622	16658	Mafb	v-maf musculoaponeurotic fibrosarcoma oncogene family, protein B (avian) [Source:MGI Symbol;Acc:MGI:104555]	2.30557	5.01795	176.823	2.39405e-40	1.99113e-37
ENSMUSG00000024990	19662	Rbp4	retinol binding protein 4, plasma [Source:MGI Symbol;Acc:MGI:97879]	3.26323	5.66085	174.441	7.92946e-40	6.28089e-37
ENSMUSG00000002058	22248	Unc119	unc-119 lipid binding chaperone [Source:MGI Symbol;Acc:MGI:1328357]	2.46547	4.23878	172.903	1.71878e-39	1.29956e-36
ENSMUSG00000030337	22317	Vamp1	vesicle-associated membrane protein 1 [Source:MGI Symbol;Acc:MGI:1313276]	2.10526	6.76543	172.704	1.89973e-39	1.37392e-36
ENSMUSG00000041685	218503	Fcho2	FCH domain only 2 [Source:MGI Symbol;Acc:MGI:3505790]	-2.25123	4.07669	172.206	2.43957e-39	1.69083e-36
ENSMUSG00000035277	11878	Arx	aristaless related homeobox [Source:MGI Symbol;Acc:MGI:1097716]	2.63514	4.17612	171.811	2.97573e-39	1.97993e-36
ENSMUSG00000032698	16909	Lmo2	LIM domain only 2 [Source:MGI Symbol;Acc:MGI:102811]	2.46141	4.79166	168.703	1.42077e-38	9.08964e-36
ENSMUSG00000020411	214112	Nipal4	NIPA-like domain containing 4 [Source:MGI Symbol;Acc:MGI:2444671]	-3.02056	3.52127	167.671	2.38746e-38	1.47085e-35
ENSMUSG00000029755	13395	Dlx5	distal-less homeobox 5 [Source:MGI Symbol;Acc:MGI:101926]	3.37262	3.4166	166.577	4.13818e-38	2.45837e-35
ENSMUSG00000029754	13396	Dlx6	distal-less homeobox 6 [Source:MGI Symbol;Acc:MGI:101927]	3.22454	3.09704	166.492	4.31926e-38	2.47747e-35
ENSMUSG00000086496	NA	Gm14204	predicted gene 14204 [Source:MGI Symbol;Acc:MGI:3651576]	2.80014	4.307	166.131	5.17818e-38	2.87113e-35
ENSMUSG00000045731	18155	Pnoc	prepronociceptin [Source:MGI Symbol;Acc:MGI:105308]	3.32371	5.46561	164.623	1.10553e-37	5.93205e-35
ENSMUSG00000031367	108012	Ap1s2	adaptor-related protein complex 1, sigma 2 subunit [Source:MGI Symbol;Acc:MGI:1889383]	2.51632	6.41394	163.07	2.41531e-37	1.25551e-34
ENSMUSG00000055435	17132	Maf	avian musculoaponeurotic fibrosarcoma oncogene homolog [Source:MGI Symbol;Acc:MGI:96909]	1.58882	5.98349	156.263	7.41815e-36	3.7392e-33
ENSMUSG00000005447	18476	Pafah1b3	platelet-activating factor acetylhydrolase, isoform 1b, subunit 3 [Source:MGI Symbol;Acc:MGI:108414]	2.12848	3.13473	155.607	1.03156e-35	5.04676e-33
ENSMUSG00000029359	57816	Tesc	tescalcin [Source:MGI Symbol;Acc:MGI:1930803]	2.11319	4.31352	152.965	3.89912e-35	1.85309e-32
ENSMUSG00000015843	20183	Rxrg	retinoid X receptor gamma [Source:MGI Symbol;Acc:MGI:98216]	2.58717	5.26367	152.38	5.23273e-35	2.41781e-32
ENSMUSG00000030844	67865	Rgs10	regulator of G-protein signalling 10 [Source:MGI Symbol;Acc:MGI:1915115]	2.20458	6.25919	151.826	6.91723e-35	3.10976e-32
ENSMUSG00000045948	24030	Mrps12	mitochondrial ribosomal protein S12 [Source:MGI Symbol;Acc:MGI:1346333]	1.84219	5.16597	149.784	1.93296e-34	8.46127e-32
ENSMUSG00000064065	320495	Ipcef1	interaction protein for cytohesin exchange factors 1 [Source:MGI Symbol;Acc:MGI:2444159]	-2.37523	5.99156	148.62	3.4715e-34	1.48064e-31
ENSMUSG00000040274	12571	Cdk6	cyclin-dependent kinase 6 [Source:MGI Symbol;Acc:MGI:1277162]	-2.58202	3.42155	147.46	6.22666e-34	2.58936e-31
ENSMUSG00000068220	16852	Lgals1	lectin, galactose binding, soluble 1 [Source:MGI Symbol;Acc:MGI:96777]	2.97106	5.74716	146.636	9.42532e-34	3.82392e-31
ENSMUSG00000030785	12862	Cox6a2	cytochrome c oxidase subunit VIa polypeptide 2 [Source:MGI Symbol;Acc:MGI:104649]	3.54894	5.79065	146.306	1.11309e-33	4.40838e-31
ENSMUSG00000050830	319922	Vwc2	von Willebrand factor C domain containing 2 [Source:MGI Symbol;Acc:MGI:2442987]	2.75301	3.65926	145.112	2.02948e-33	7.85079e-31
ENSMUSG00000039257	58188	Vstm2b	V-set and transmembrane domain containing 2B [Source:MGI Symbol;Acc:MGI:1914525]	1.93276	4.95704	144.559	2.68126e-33	1.01364e-30
ENSMUSG00000095139	18992	Pou3f2	POU domain, class 3, transcription factor 2 [Source:MGI Symbol;Acc:MGI:101895]	-2.19584	5.61279	143.742	4.04485e-33	1.49516e-30
ENSMUSG00000061665	12488	Cd2ap	CD2-associated protein [Source:MGI Symbol;Acc:MGI:1330281]	-2.18466	3.1367	142.696	6.85143e-33	2.47754e-30
ENSMUSG00000085042	NA	Abhd11os	abhydrolase domain containing 11, opposite strand [Source:MGI Symbol;Acc:MGI:1917062]	4.20527	2.36485	141.922	1.01138e-32	3.57944e-30
ENSMUSG00000032269	15561	Htr3a	5-hydroxytryptamine (serotonin) receptor 3A [Source:MGI Symbol;Acc:MGI:96282]	3.05869	3.82971	141.259	1.41239e-32	4.89452e-30
ENSMUSG00000046378	233879	Asphd1	aspartate beta-hydroxylase domain containing 1 [Source:MGI Symbol;Acc:MGI:2685014]	1.52227	4.82139	141.123	1.51248e-32	5.13441e-30
ENSMUSG00000022216	19186	Psme1	proteasome (prosome, macropain) activator subunit 1 (PA28 alpha) [Source:MGI Symbol;Acc:MGI:1096367]	1.88816	4.77089	140.928	1.66838e-32	5.55038e-30
ENSMUSG00000005716	19293	Pvalb	parvalbumin [Source:MGI Symbol;Acc:MGI:97821]	3.88699	9.07093	140.594	1.97346e-32	6.41572e-30
ENSMUSG00000026568	70456	Mpc2	mitochondrial pyruvate carrier 2 [Source:MGI Symbol;Acc:MGI:1917706]	1.8421	6.52263	140.562	2.00564e-32	6.41572e-30
ENSMUSG00000027400	18610	Pdyn	prodynorphin [Source:MGI Symbol;Acc:MGI:97535]	2.27376	6.32476	140.501	2.06811e-32	6.49073e-30
ENSMUSG00000000552	29813	Zfp385a	zinc finger protein 385A [Source:MGI Symbol;Acc:MGI:1352495]	2.44213	3.35953	140.114	2.51311e-32	7.74132e-30
ENSMUSG00000011148	11565	Adssl1	adenylosuccinate synthetase like 1 [Source:MGI Symbol;Acc:MGI:87947]	1.92675	4.30555	140.042	2.60677e-32	7.88383e-30
ENSMUSG00000048616	18121	Nog	noggin [Source:MGI Symbol;Acc:MGI:104327]	2.52975	3.12244	139.682	3.12421e-32	9.28002e-30
ENSMUSG00000002416	68198	Ndufb2	NADH dehydrogenase (ubiquinone) 1 beta subcomplex, 2 [Source:MGI Symbol;Acc:MGI:1915448]	1.90424	6.07982	138.96	4.49341e-32	1.31129e-29
ENSMUSG00000029177	12615	Cenpa	centromere protein A [Source:MGI Symbol;Acc:MGI:88375]	2.93611	3.49871	138.814	4.83717e-32	1.38727e-29
ENSMUSG00000033938	66916	Ndufb7	NADH dehydrogenase (ubiquinone) 1 beta subcomplex, 7 [Source:MGI Symbol;Acc:MGI:1914166]	1.88295	6.63234	137.739	8.31242e-32	2.34354e-29
ENSMUSG00000061718	19049	Ppp1r1b	protein phosphatase 1, regulatory (inhibitor) subunit 1B [Source:MGI Symbol;Acc:MGI:94860]	3.07471	8.56083	137.562	9.0866e-32	2.51911e-29
ENSMUSG00000059518	70103	Znhit1	zinc finger, HIT domain containing 1 [Source:MGI Symbol;Acc:MGI:1917353]	1.58284	5.58363	137.301	1.0365e-31	2.82641e-29
ENSMUSG00000001988	18142	Npas1	neuronal PAS domain protein 1 [Source:MGI Symbol;Acc:MGI:109205]	3.34973	2.70405	137.263	1.05618e-31	2.83362e-29
ENSMUSG00000031458	66423	Coprs	coordinator of PRMT5, differentiation stimulator [Source:MGI Symbol;Acc:MGI:1913673]	1.94173	4.78335	135.669	2.35681e-31	6.22274e-29
ENSMUSG00000046178	18231	Nxph1	neurexophilin 1 [Source:MGI Symbol;Acc:MGI:107492]	2.64568	7.09002	135.628	2.40661e-31	6.25494e-29
ENSMUSG00000058975	16502	Kcnc1	potassium voltage gated channel, Shaw-related subfamily, member 1 [Source:MGI Symbol;Acc:MGI:96667]	1.65984	7.23469	135.111	3.12157e-31	7.98835e-29
ENSMUSG00000025400	21334	Tac2	tachykinin 2 [Source:MGI Symbol;Acc:MGI:98476]	3.42193	5.63529	135.03	3.25222e-31	8.19657e-29
ENSMUSG00000023328	11423	Ache	acetylcholinesterase [Source:MGI Symbol;Acc:MGI:87876]	2.15458	4.93484	134.818	3.61899e-31	8.98481e-29
ENSMUSG00000002728	67877	Naa20	N(alpha)-acetyltransferase 20, NatB catalytic subunit [Source:MGI Symbol;Acc:MGI:1915127]	1.57988	5.97513	134.224	4.87961e-31	1.19364e-28
ENSMUSG00000062352	16413	Itgb1bp1	integrin beta 1 binding protein 1 [Source:MGI Symbol;Acc:MGI:1306802]	1.69116	4.94088	134.127	5.12474e-31	1.23543e-28
ENSMUSG00000033307	17319	Mif	macrophage migration inhibitory factor (glycosylation-inhibiting factor) [Source:MGI Symbol;Acc:MGI:96982]	1.68322	6.18418	134.077	5.2557e-31	1.24891e-28
ENSMUSG00000031714	14388	Gab1	growth factor receptor bound protein 2-associated protein 1 [Source:MGI Symbol;Acc:MGI:108088]	-2.31605	4.83182	133.299	7.77898e-31	1.82247e-28
ENSMUSG00000032020	72828	Ubash3b	ubiquitin associated and SH3 domain containing, B [Source:MGI Symbol;Acc:MGI:1920078]	1.73274	7.06422	132.883	9.59181e-31	2.21598e-28
ENSMUSG00000028842	214150	Ago3	argonaute RISC catalytic subunit 3 [Source:MGI Symbol;Acc:MGI:2446634]	-1.90307	5.15189	132.534	1.14327e-30	2.6051e-28
ENSMUSG00000050071	19716	Bex1	brain expressed X-linked 1 [Source:MGI Symbol;Acc:MGI:1328321]	2.13897	5.63921	132.454	1.19043e-30	2.67588e-28
ENSMUSG00000027384	69487	Ndufaf5	NADH dehydrogenase (ubiquinone) complex I, assembly factor 5 [Source:MGI Symbol;Acc:MGI:1916737]	1.57369	5.82299	132.411	1.21609e-30	2.69712e-28
ENSMUSG00000049796	12918	Crh	corticotropin releasing hormone [Source:MGI Symbol;Acc:MGI:88496]	3.50478	4.06709	131.855	1.60959e-30	3.52289e-28
ENSMUSG00000025241	17281	Fyco1	FYVE and coiled-coil domain containing 1 [Source:MGI Symbol;Acc:MGI:107277]	-2.54213	5.50755	131.733	1.71183e-30	3.698e-28
ENSMUSG00000000088	12858	Cox5a	cytochrome c oxidase subunit Va [Source:MGI Symbol;Acc:MGI:88474]	1.82877	5.86353	131.467	1.95659e-30	4.13202e-28
ENSMUSG00000063856	14775	Gpx1	glutathione peroxidase 1 [Source:MGI Symbol;Acc:MGI:104887]	1.63949	7.00588	131.462	1.96243e-30	4.13202e-28
ENSMUSG00000047205	75219	Dusp18	dual specificity phosphatase 18 [Source:MGI Symbol;Acc:MGI:1922469]	-1.93888	5.69449	131.319	2.10858e-30	4.38426e-28
ENSMUSG00000032291	12903	Crabp1	cellular retinoic acid binding protein I [Source:MGI Symbol;Acc:MGI:88490]	3.42803	3.13434	130.59	3.0446e-30	6.25233e-28
ENSMUSG00000036197	223827	Gxylt1	glucoside xylosyltransferase 1 [Source:MGI Symbol;Acc:MGI:2684933]	-1.97201	3.4985	130.483	3.21241e-30	6.51649e-28
ENSMUSG00000039405	76453	Prss23	protease, serine 23 [Source:MGI Symbol;Acc:MGI:1923703]	2.29944	5.02881	130.443	3.27883e-30	6.57109e-28
ENSMUSG00000020205	21664	Phlda1	pleckstrin homology like domain, family A, member 1 [Source:MGI Symbol;Acc:MGI:1096880]	2.20312	4.63509	130.219	3.66892e-30	7.26533e-28
ENSMUSG00000045991	225631	Onecut2	one cut domain, family member 2 [Source:MGI Symbol;Acc:MGI:1891408]	-3.06772	2.82571	130.152	3.79584e-30	7.42823e-28
ENSMUSG00000024597	20496	Slc12a2	solute carrier family 12, member 2 [Source:MGI Symbol;Acc:MGI:101924]	-2.45942	6.63688	129.053	6.60453e-30	1.27744e-27
ENSMUSG00000038816	54366	Ctnnal1	catenin (cadherin associated protein), alpha-like 1 [Source:MGI Symbol;Acc:MGI:1859649]	-2.8136	3.66657	128.025	1.10849e-29	2.11938e-27
ENSMUSG00000045193	12696	Cirbp	cold inducible RNA binding protein [Source:MGI Symbol;Acc:MGI:893588]	1.71557	5.51552	127.911	1.17403e-29	2.21919e-27
ENSMUSG00000020810	114886	Cygb	cytoglobin [Source:MGI Symbol;Acc:MGI:2149481]	2.2994	5.19465	127.393	1.52374e-29	2.84786e-27
ENSMUSG00000049422	103172	Chchd10	coiled-coil-helix-coiled-coil-helix domain containing 10 [Source:MGI Symbol;Acc:MGI:2143558]	2.30728	6.76869	126.842	2.01187e-29	3.71839e-27
ENSMUSG00000085438	NA	1700020I14Rik	RIKEN cDNA 1700020I14 gene [Source:MGI Symbol;Acc:MGI:1913852]	-1.93006	8.30955	126.568	2.30952e-29	4.22161e-27
ENSMUSG00000019772	22353	Vip	vasoactive intestinal polypeptide [Source:MGI Symbol;Acc:MGI:98933]	3.27203	7.96119	126.278	2.67244e-29	4.83189e-27
ENSMUSG00000079598	665180	Clec2l	C-type lectin domain family 2, member L [Source:MGI Symbol;Acc:MGI:2141402]	1.67347	6.75718	126.207	2.77004e-29	4.95449e-27
ENSMUSG00000063661	223915	Krt73	keratin 73 [Source:MGI Symbol;Acc:MGI:3607712]	3.04296	2.68206	125.539	3.87836e-29	6.86304e-27
ENSMUSG00000020834	70451	Dhrs13	dehydrogenase/reductase (SDR family) member 13 [Source:MGI Symbol;Acc:MGI:1917701]	1.85183	3.13845	124.307	7.21693e-29	1.26365e-26
ENSMUSG00000034472	75141	Rasd2	RASD family, member 2 [Source:MGI Symbol;Acc:MGI:1922391]	2.02392	7.1425	124.189	7.65781e-29	1.32206e-26
ENSMUSG00000025466	69064	Fuom	fucose mutarotase [Source:MGI Symbol;Acc:MGI:1916314]	1.78364	5.53569	124.176	7.70951e-29	1.32206e-26
ENSMUSG00000063659	30928	Zbtb18	zinc finger and BTB domain containing 18 [Source:MGI Symbol;Acc:MGI:1353609]	-1.89602	6.60015	123.914	8.79777e-29	1.49329e-26
ENSMUSG00000003657	12308	Calb2	calbindin 2 [Source:MGI Symbol;Acc:MGI:101914]	2.33206	5.5351	123.815	9.24649e-29	1.5536e-26
ENSMUSG00000040929	19726	Rfx3	regulatory factor X, 3 (influences HLA class II expression) [Source:MGI Symbol;Acc:MGI:106582]	-2.15781	5.2891	123.685	9.87303e-29	1.64228e-26
ENSMUSG00000091636	320722	Akain1	A kinase (PRKA) anchor inhibitor 1 [Source:MGI Symbol;Acc:MGI:2444600]	2.50379	3.23741	123.44	1.11689e-28	1.83945e-26
ENSMUSG00000036782	67455	Klhl13	kelch-like 13 [Source:MGI Symbol;Acc:MGI:1914705]	2.05876	6.25177	121.213	3.43194e-28	5.59676e-26
ENSMUSG00000024944	56327	Arl2	ADP-ribosylation factor-like 2 [Source:MGI Symbol;Acc:MGI:1928393]	1.61512	6.23639	121.051	3.7241e-28	6.01423e-26
ENSMUSG00000051062	237730	Fbll1	fibrillarin-like 1 [Source:MGI Symbol;Acc:MGI:3034689]	2.02855	4.83119	120.392	5.19123e-28	8.28097e-26
ENSMUSG00000026830	77767	Ermn	ermin, ERM-like protein [Source:MGI Symbol;Acc:MGI:1925017]	-2.97153	6.00068	120.378	5.22726e-28	8.28097e-26
ENSMUSG00000026604	19250	Ptpn14	protein tyrosine phosphatase, non-receptor type 14 [Source:MGI Symbol;Acc:MGI:102467]	-2.76122	2.21993	118.717	1.20781e-27	1.89535e-25
ENSMUSG00000030357	14228	Fkbp4	FK506 binding protein 4 [Source:MGI Symbol;Acc:MGI:95543]	1.49467	7.05031	118.642	1.25473e-27	1.9314e-25
ENSMUSG00000062252	328789	Lhfpl5	lipoma HMGIC fusion partner-like 5 [Source:MGI Symbol;Acc:MGI:1915382]	2.53128	3.55533	118.629	1.26268e-27	1.9314e-25
ENSMUSG00000018166	13867	Erbb3	erb-b2 receptor tyrosine kinase 3 [Source:MGI Symbol;Acc:MGI:95411]	-3.00827	3.7418	118.624	1.26562e-27	1.9314e-25
ENSMUSG00000023064	20618	Sncg	synuclein, gamma [Source:MGI Symbol;Acc:MGI:1298397]	3.14213	2.8951	117.867	1.85421e-27	2.80391e-25
ENSMUSG00000020042	74007	Btbd11	BTB (POZ) domain containing 11 [Source:MGI Symbol;Acc:MGI:1921257]	1.84458	5.68714	117.841	1.87828e-27	2.81471e-25
ENSMUSG00000017491	218772	Rarb	retinoic acid receptor, beta [Source:MGI Symbol;Acc:MGI:97857]	2.32683	5.44707	117.689	2.02816e-27	3.01218e-25
ENSMUSG00000042197	98403	Zfp451	zinc finger protein 451 [Source:MGI Symbol;Acc:MGI:2137896]	-1.41607	5.74685	117.389	2.3589e-27	3.47238e-25
ENSMUSG00000008575	18028	Nfib	nuclear factor I/B [Source:MGI Symbol;Acc:MGI:103188]	-1.82688	7.38668	117.165	2.64117e-27	3.85379e-25
ENSMUSG00000004366	20604	Sst	somatostatin [Source:MGI Symbol;Acc:MGI:98326]	3.93483	10.1831	116.99	2.88457e-27	4.17235e-25
ENSMUSG00000070287	245020	Slc35g2	solute carrier family 35, member G2 [Source:MGI Symbol;Acc:MGI:2685365]	2.12978	5.65446	116.428	3.82981e-27	5.49181e-25
ENSMUSG00000079478	56390	Sssca1	Sjogren syndrome/scleroderma autoantigen 1 [Source:MGI Symbol;Acc:MGI:1913482]	1.89166	3.86945	116.399	3.88702e-27	5.52621e-25
ENSMUSG00000021214	105349	Akr1c18	aldo-keto reductase family 1, member C18 [Source:MGI Symbol;Acc:MGI:2145420]	3.22251	3.40759	116.22	4.25286e-27	5.96249e-25
ENSMUSG00000049866	320982	Arl4c	ADP-ribosylation factor-like 4C [Source:MGI Symbol;Acc:MGI:2445172]	1.77706	5.74964	116.215	4.26558e-27	5.96249e-25
ENSMUSG00000030611	67994	Mrps11	mitochondrial ribosomal protein S11 [Source:MGI Symbol;Acc:MGI:1915244]	1.52308	5.09736	115.789	5.28521e-27	7.32618e-25
ENSMUSG00000027495	67017	Fam210b	family with sequence similarity 210, member B [Source:MGI Symbol;Acc:MGI:1914267]	2.08297	4.76648	115.643	5.68979e-27	7.82182e-25
ENSMUSG00000024383	26405	Map3k2	mitogen-activated protein kinase kinase kinase 2 [Source:MGI Symbol;Acc:MGI:1346873]	-1.72997	3.96343	115.497	6.12401e-27	8.34974e-25
ENSMUSG00000020061	109272	Mybpc1	myosin binding protein C, slow-type [Source:MGI Symbol;Acc:MGI:1336213]	2.3158	3.51583	114.392	1.06937e-26	1.44617e-24
ENSMUSG00000025499	15461	Hras	Harvey rat sarcoma virus oncogene [Source:MGI Symbol;Acc:MGI:96224]	1.57736	6.2453	114.373	1.07987e-26	1.44859e-24
ENSMUSG00000048776	19227	Pthlh	parathyroid hormone-like peptide [Source:MGI Symbol;Acc:MGI:97800]	3.24311	3.47448	114.121	1.22576e-26	1.62166e-24
ENSMUSG00000036098	225908	Myrf	myelin regulatory factor [Source:MGI Symbol;Acc:MGI:2684944]	-2.78617	4.94736	114.117	1.22838e-26	1.62166e-24
ENSMUSG00000054196	68588	Cthrc1	collagen triple helix repeat containing 1 [Source:MGI Symbol;Acc:MGI:1915838]	1.83067	4.32363	114.023	1.2881e-26	1.68711e-24
ENSMUSG00000032289	207596	Thsd4	thrombospondin, type I, domain containing 4 [Source:MGI Symbol;Acc:MGI:2672033]	-2.54829	3.06244	113.587	1.60463e-26	2.08527e-24
ENSMUSG00000031925	270118	Maml2	mastermind like 2 (Drosophila) [Source:MGI Symbol;Acc:MGI:2389460]	-2.31047	5.00147	113.344	1.81403e-26	2.33912e-24
ENSMUSG00000040112	232536	Mrps35	mitochondrial ribosomal protein S35 [Source:MGI Symbol;Acc:MGI:2385255]	1.59624	4.27644	113.126	2.02471e-26	2.59069e-24
ENSMUSG00000025521	73067	Tmem192	transmembrane protein 192 [Source:MGI Symbol;Acc:MGI:1920317]	1.55911	3.77022	113.017	2.13986e-26	2.71714e-24
ENSMUSG00000038195	280408	Rilp	Rab interacting lysosomal protein [Source:MGI Symbol;Acc:MGI:2144271]	2.64374	1.91077	112.997	2.16098e-26	2.72317e-24
ENSMUSG00000049946	234290	BC030500	cDNA sequence BC030500 [Source:MGI Symbol;Acc:MGI:2447770]	2.0001	4.23266	112.717	2.48876e-26	3.10281e-24
ENSMUSG00000068284	207806	Usf3	upstream transcription factor family member 3 [Source:MGI Symbol;Acc:MGI:2685454]	-1.62984	5.11967	112.708	2.49956e-26	3.10281e-24
ENSMUSG00000038173	320981	Enpp6	ectonucleotide pyrophosphatase/phosphodiesterase 6 [Source:MGI Symbol;Acc:MGI:2445171]	-3.2601	5.26847	112.524	2.74336e-26	3.38022e-24
ENSMUSG00000025825	66383	Iscu	iron-sulfur cluster assembly enzyme [Source:MGI Symbol;Acc:MGI:1913633]	1.80875	5.12119	112.367	2.96956e-26	3.63203e-24
ENSMUSG00000029819	109648	Npy	neuropeptide Y [Source:MGI Symbol;Acc:MGI:97374]	3.71744	10.3615	112.254	3.14329e-26	3.81646e-24
ENSMUSG00000040943	214133	Tet2	tet methylcytosine dioxygenase 2 [Source:MGI Symbol;Acc:MGI:2443298]	-1.97782	4.71531	111.972	3.62302e-26	4.36706e-24
ENSMUSG00000027009	16401	Itga4	integrin alpha 4 [Source:MGI Symbol;Acc:MGI:96603]	-3.19826	2.93182	111.856	3.84312e-26	4.59902e-24
ENSMUSG00000030500	140919	Slc17a6	solute carrier family 17 (sodium-dependent inorganic phosphate cotransporter), member 6 [Source:MGI Symbol;Acc:MGI:2156052]	-3.25987	5.75737	111.706	4.14401e-26	4.92368e-24
ENSMUSG00000074754	228715	Smim26	small integral membrane protein 26 [Source:MGI Symbol;Acc:MGI:2685407]	1.87029	5.65545	111.356	4.94499e-26	5.83368e-24
ENSMUSG00000060240	57754	Cend1	cell cycle exit and neuronal differentiation 1 [Source:MGI Symbol;Acc:MGI:1929898]	1.88453	8.10867	111.081	5.68016e-26	6.65379e-24
ENSMUSG00000031285	13193	Dcx	doublecortin [Source:MGI Symbol;Acc:MGI:1277171]	-2.12235	5.2534	110.735	6.76448e-26	7.86856e-24
ENSMUSG00000037652	241915	Phc3	polyhomeotic-like 3 (Drosophila) [Source:MGI Symbol;Acc:MGI:2181434]	-1.53163	4.87365	110.567	7.36311e-26	8.50542e-24
ENSMUSG00000047656	107328	Trpt1	tRNA phosphotransferase 1 [Source:MGI Symbol;Acc:MGI:1333115]	1.6944	3.73646	110.202	8.84803e-26	1.01502e-23
ENSMUSG00000039982	207521	Dtx4	deltex 4, E3 ubiquitin ligase [Source:MGI Symbol;Acc:MGI:2672905]	-1.51385	5.32044	109.991	9.84315e-26	1.11404e-23
ENSMUSG00000022500	56722	Litaf	LPS-induced TN factor [Source:MGI Symbol;Acc:MGI:1929512]	-2.74233	4.96945	109.991	9.84511e-26	1.11404e-23
ENSMUSG00000030879	27397	Mrpl17	mitochondrial ribosomal protein L17 [Source:MGI Symbol;Acc:MGI:1351608]	1.40114	5.77743	109.78	1.09481e-25	1.23048e-23
ENSMUSG00000061762	21333	Tac1	tachykinin 1 [Source:MGI Symbol;Acc:MGI:98474]	3.04555	7.87573	109.607	1.19486e-25	1.33391e-23
ENSMUSG00000024298	208292	Zfp871	zinc finger protein 871 [Source:MGI Symbol;Acc:MGI:1921793]	-1.70362	5.98409	109.477	1.27586e-25	1.41485e-23
ENSMUSG00000031216	236920	Stard8	START domain containing 8 [Source:MGI Symbol;Acc:MGI:2448556]	-2.54489	4.3356	109.446	1.29581e-25	1.42746e-23
ENSMUSG00000025221	80906	Kcnip2	Kv channel-interacting protein 2 [Source:MGI Symbol;Acc:MGI:2135916]	1.42404	6.98281	109.314	1.38496e-25	1.51562e-23
ENSMUSG00000046432	12070	Bex3	brain expressed X-linked 3 [Source:MGI Symbol;Acc:MGI:1338016]	1.7513	8.02147	109.153	1.50201e-25	1.63297e-23
ENSMUSG00000045034	218440	Ankrd34b	ankyrin repeat domain 34B [Source:MGI Symbol;Acc:MGI:2443245]	1.94146	3.28358	109.132	1.51865e-25	1.64034e-23
ENSMUSG00000100303	NA	2600014E21Rik	RIKEN cDNA 2600014E21 gene [Source:MGI Symbol;Acc:MGI:1919384]	-2.80497	1.639	108.926	1.68487e-25	1.80814e-23
ENSMUSG00000044813	230126	Shb	src homology 2 domain-containing transforming protein B [Source:MGI Symbol;Acc:MGI:98294]	2.42488	2.06004	108.847	1.75288e-25	1.86906e-23
ENSMUSG00000025959	93691	Klf7	Kruppel-like factor 7 (ubiquitous) [Source:MGI Symbol;Acc:MGI:1935151]	-1.53767	6.03283	108.568	2.01833e-25	2.1384e-23
ENSMUSG00000070858	381633	Gm1673	predicted gene 1673 [Source:MGI Symbol;Acc:MGI:2686519]	2.24497	3.11432	108.414	2.18153e-25	2.29668e-23
ENSMUSG00000026566	68481	Mpzl1	myelin protein zero-like 1 [Source:MGI Symbol;Acc:MGI:1915731]	-1.79808	5.14186	108.387	2.21054e-25	2.31259e-23
ENSMUSG00000005054	13014	Cstb	cystatin B [Source:MGI Symbol;Acc:MGI:109514]	1.55677	6.13737	107.865	2.87723e-25	2.99124e-23
ENSMUSG00000021703	218442	Serinc5	serine incorporator 5 [Source:MGI Symbol;Acc:MGI:2444223]	-2.06715	5.56859	107.833	2.92334e-25	3.0203e-23
ENSMUSG00000078117	NA	Gm16485	predicted gene 16485 [Source:MGI Symbol;Acc:MGI:3642771]	-1.96395	3.25103	107.742	3.06212e-25	3.14415e-23
ENSMUSG00000048967	67184	Yjefn3	YjeF N-terminal domain containing 3 [Source:MGI Symbol;Acc:MGI:2681845]	2.92372	1.89212	107.723	3.09139e-25	3.15473e-23
ENSMUSG00000034761	399510	Map4k5	mitogen-activated protein kinase kinase kinase kinase 5 [Source:MGI Symbol;Acc:MGI:1925503]	-1.68482	4.59927	107.663	3.18538e-25	3.23083e-23
ENSMUSG00000021868	105675	Ppif	peptidylprolyl isomerase F (cyclophilin F) [Source:MGI Symbol;Acc:MGI:2145814]	1.89032	5.33854	107.63	3.23898e-25	3.26528e-23
ENSMUSG00000029161	68567	Cgref1	cell growth regulator with EF hand domain 1 [Source:MGI Symbol;Acc:MGI:1915817]	1.89055	4.86764	106.922	4.63081e-25	4.64029e-23
ENSMUSG00000045246	66733	Kcng4	potassium voltage-gated channel, subfamily G, member 4 [Source:MGI Symbol;Acc:MGI:1913983]	1.9987	3.3664	106.772	4.99498e-25	4.97524e-23
ENSMUSG00000028447	53598	Dctn3	dynactin 3 [Source:MGI Symbol;Acc:MGI:1859251]	1.33422	6.48255	106.727	5.1102e-25	5.05971e-23
ENSMUSG00000023911	76917	Flywch2	FLYWCH family member 2 [Source:MGI Symbol;Acc:MGI:1924167]	2.39206	3.59012	106.468	5.8211e-25	5.72948e-23
ENSMUSG00000002660	53895	Clpp	caseinolytic mitochondrial matrix peptidase proteolytic subunit [Source:MGI Symbol;Acc:MGI:1858213]	1.63628	6.85582	106.428	5.94041e-25	5.81252e-23
ENSMUSG00000039680	121022	Mrps6	mitochondrial ribosomal protein S6 [Source:MGI Symbol;Acc:MGI:2153111]	1.85041	5.04405	106.315	6.2888e-25	6.11742e-23
ENSMUSG00000008822	66204	Acyp1	acylphosphatase 1, erythrocyte (common) type [Source:MGI Symbol;Acc:MGI:1913454]	1.59541	4.7941	106.262	6.46155e-25	6.24892e-23
ENSMUSG00000003847	54446	Nfat5	nuclear factor of activated T cells 5 [Source:MGI Symbol;Acc:MGI:1859333]	-1.87607	5.31771	105.905	7.73558e-25	7.43778e-23
ENSMUSG00000036192	225998	Rorb	RAR-related orphan receptor beta [Source:MGI Symbol;Acc:MGI:1343464]	-3.54754	7.04571	105.893	7.78296e-25	7.44033e-23
ENSMUSG00000041444	330914	Arhgap32	Rho GTPase activating protein 32 [Source:MGI Symbol;Acc:MGI:2450166]	-1.62649	6.41766	105.761	8.31842e-25	7.90678e-23
ENSMUSG00000055296	242474	Tmem245	transmembrane protein 245 [Source:MGI Symbol;Acc:MGI:2445107]	-2.27826	6.75802	105.455	9.70949e-25	9.17658e-23
ENSMUSG00000015714	76893	Cers2	ceramide synthase 2 [Source:MGI Symbol;Acc:MGI:1924143]	-2.11497	6.25829	105.393	1.00152e-24	9.41204e-23
ENSMUSG00000033287	72844	Kctd17	potassium channel tetramerisation domain containing 17 [Source:MGI Symbol;Acc:MGI:1920094]	1.62957	4.55073	105.11	1.15514e-24	1.07948e-22
ENSMUSG00000018339	14778	Gpx3	glutathione peroxidase 3 [Source:MGI Symbol;Acc:MGI:105102]	2.60966	3.33254	104.343	1.70145e-24	1.58112e-22
ENSMUSG00000020219	30055	Timm13	translocase of inner mitochondrial membrane 13 [Source:MGI Symbol;Acc:MGI:1353432]	1.58777	6.82268	104.268	1.76693e-24	1.63284e-22
ENSMUSG00000029231	18595	Pdgfra	platelet derived growth factor receptor, alpha polypeptide [Source:MGI Symbol;Acc:MGI:97530]	-2.87881	5.61001	104.105	1.91884e-24	1.76342e-22
ENSMUSG00000073676	15528	Hspe1	heat shock protein 1 (chaperonin 10) [Source:MGI Symbol;Acc:MGI:104680]	1.8089	5.77788	103.912	2.11471e-24	1.93275e-22
ENSMUSG00000027695	18805	Pld1	phospholipase D1 [Source:MGI Symbol;Acc:MGI:109585]	-2.31906	3.30926	103.883	2.14573e-24	1.95039e-22
ENSMUSG00000032854	22239	Ugt8a	UDP galactosyltransferase 8A [Source:MGI Symbol;Acc:MGI:109522]	-2.99619	7.31792	103.453	2.66659e-24	2.39999e-22
ENSMUSG00000056899	93757	Immp2l	IMP2 inner mitochondrial membrane peptidase-like (S. cerevisiae) [Source:MGI Symbol;Acc:MGI:2135611]	1.77224	3.58716	103.451	2.66922e-24	2.39999e-22
ENSMUSG00000028382	230257	Ptbp3	polypyrimidine tract binding protein 3 [Source:MGI Symbol;Acc:MGI:1923334]	-1.76323	4.06742	103.393	2.7484e-24	2.4579e-22
ENSMUSG00000039607	207181	Rbms3	RNA binding motif, single stranded interacting protein [Source:MGI Symbol;Acc:MGI:2444477]	1.36442	5.3938	103.376	2.77163e-24	2.46542e-22
ENSMUSG00000022607	14083	Ptk2	PTK2 protein tyrosine kinase 2 [Source:MGI Symbol;Acc:MGI:95481]	-1.41156	6.28804	103.085	3.21004e-24	2.84021e-22
ENSMUSG00000028865	69655	Cd164l2	CD164 sialomucin-like 2 [Source:MGI Symbol;Acc:MGI:1916905]	1.79205	3.33351	102.989	3.36997e-24	2.96593e-22
ENSMUSG00000009828	56542	Ick	intestinal cell kinase [Source:MGI Symbol;Acc:MGI:1934157]	-1.49721	4.3134	102.939	3.45565e-24	3.02533e-22
ENSMUSG00000033615	12889	Cplx1	complexin 1 [Source:MGI Symbol;Acc:MGI:104727]	2.13519	9.28321	102.543	4.22007e-24	3.67522e-22
ENSMUSG00000022577	23934	Ly6h	lymphocyte antigen 6 complex, locus H [Source:MGI Symbol;Acc:MGI:1346030]	1.88239	4.6056	102.18	5.06989e-24	4.39232e-22
ENSMUSG00000022514	16180	Il1rap	interleukin 1 receptor accessory protein [Source:MGI Symbol;Acc:MGI:104975]	-2.47581	5.56654	102.169	5.0989e-24	4.39456e-22
ENSMUSG00000031129	331004	Slc9a9	solute carrier family 9 (sodium/hydrogen exchanger), member 9 [Source:MGI Symbol;Acc:MGI:2679732]	-2.0016	4.8395	102.037	5.45039e-24	4.67329e-22
ENSMUSG00000031409	66104	Tceal6	transcription elongation factor A (SII)-like 6 [Source:MGI Symbol;Acc:MGI:1923939]	1.73174	4.26456	101.922	5.77497e-24	4.9262e-22
ENSMUSG00000025268	80884	Maged2	melanoma antigen, family D, 2 [Source:MGI Symbol;Acc:MGI:1933391]	1.50894	5.81337	101.732	6.35517e-24	5.39347e-22
ENSMUSG00000018470	16499	Kcnab3	potassium voltage-gated channel, shaker-related subfamily, beta member 3 [Source:MGI Symbol;Acc:MGI:1336208]	1.60594	5.81186	101.276	8.00132e-24	6.7514e-22
ENSMUSG00000074607	269389	Tox2	TOX high mobility group box family member 2 [Source:MGI Symbol;Acc:MGI:3611233]	1.85421	4.41755	101.267	8.03641e-24	6.7514e-22
ENSMUSG00000028955	22319	Vamp3	vesicle-associated membrane protein 3 [Source:MGI Symbol;Acc:MGI:1321389]	-2.00995	5.93439	101.095	8.76854e-24	7.32944e-22
ENSMUSG00000033007	241118	Asic4	acid-sensing (proton-gated) ion channel family member 4 [Source:MGI Symbol;Acc:MGI:2652846]	2.70181	2.21483	100.932	9.52159e-24	7.91911e-22
ENSMUSG00000097558	NA	Gm26902	predicted gene, 26902 [Source:MGI Symbol;Acc:MGI:5477396]	2.8309	1.11549	100.872	9.81419e-24	8.12185e-22
ENSMUSG00000027087	16410	Itgav	integrin alpha V [Source:MGI Symbol;Acc:MGI:96608]	-2.2996	6.65784	100.797	1.01899e-23	8.391e-22
ENSMUSG00000024953	54683	Prdx5	peroxiredoxin 5 [Source:MGI Symbol;Acc:MGI:1859821]	1.76303	8.46182	100.202	1.37597e-23	1.12748e-21
ENSMUSG00000038538	320538	Ubn2	ubinuclein 2 [Source:MGI Symbol;Acc:MGI:2444236]	-2.08216	5.87138	99.9942	1.52847e-23	1.2463e-21
ENSMUSG00000042826	14166	Fgf11	fibroblast growth factor 11 [Source:MGI Symbol;Acc:MGI:109167]	1.61166	4.11455	99.9086	1.59596e-23	1.29498e-21
ENSMUSG00000018821	69534	Avpi1	arginine vasopressin-induced 1 [Source:MGI Symbol;Acc:MGI:1916784]	1.52658	4.46275	99.8743	1.62386e-23	1.31122e-21
ENSMUSG00000036748	67116	Cuedc2	CUE domain containing 2 [Source:MGI Symbol;Acc:MGI:1914366]	1.3659	6.4306	99.7978	1.68778e-23	1.35626e-21
ENSMUSG00000022013	66148	Dnajc15	DnaJ heat shock protein family (Hsp40) member C15 [Source:MGI Symbol;Acc:MGI:1913398]	1.57895	6.04459	99.5998	1.86526e-23	1.49167e-21
ENSMUSG00000031636	53318	Pdlim3	PDZ and LIM domain 3 [Source:MGI Symbol;Acc:MGI:1859274]	3.05163	1.92862	99.1393	2.35355e-23	1.87315e-21
ENSMUSG00000024446	67676	Rpp21	ribonuclease P 21 subunit [Source:MGI Symbol;Acc:MGI:1914926]	1.41184	5.76819	99.0785	2.42687e-23	1.92231e-21
ENSMUSG00000020267	15254	Hint1	histidine triad nucleotide binding protein 1 [Source:MGI Symbol;Acc:MGI:1321133]	1.81948	8.53238	98.8446	2.7311e-23	2.15304e-21
ENSMUSG00000029769	232664	Ccdc136	coiled-coil domain containing 136 [Source:MGI Symbol;Acc:MGI:1918128]	1.53012	6.21936	98.6359	3.03468e-23	2.38108e-21
ENSMUSG00000019158	69094	Tmem160	transmembrane protein 160 [Source:MGI Symbol;Acc:MGI:1916344]	1.83464	3.74858	98.5786	3.1237e-23	2.43942e-21
ENSMUSG00000030213	54343	Atf7ip	activating transcription factor 7 interacting protein [Source:MGI Symbol;Acc:MGI:1858965]	-1.48012	5.62049	98.4049	3.4101e-23	2.65063e-21
ENSMUSG00000035168	66860	Tanc1	tetratricopeptide repeat, ankyrin repeat and coiled-coil containing 1 [Source:MGI Symbol;Acc:MGI:1914110]	-1.52819	4.09928	97.9936	4.19745e-23	3.24746e-21
ENSMUSG00000071176	234094	Arhgef10	Rho guanine nucleotide exchange factor (GEF) 10 [Source:MGI Symbol;Acc:MGI:2444453]	-2.39961	3.68706	97.9715	4.24447e-23	3.26864e-21
ENSMUSG00000006315	69804	Tmem147	transmembrane protein 147 [Source:MGI Symbol;Acc:MGI:1915011]	1.34059	7.45993	97.7689	4.70179e-23	3.60413e-21
ENSMUSG00000042485	66175	Mustn1	musculoskeletal, embryonic nuclear protein 1 [Source:MGI Symbol;Acc:MGI:1913425]	2.6586	2.1358	97.7063	4.85282e-23	3.70284e-21
ENSMUSG00000048988	243312	Elfn1	leucine rich repeat and fibronectin type III, extracellular 1 [Source:MGI Symbol;Acc:MGI:2442479]	2.01295	3.59343	97.6382	5.0225e-23	3.81481e-21
ENSMUSG00000002379	69875	Ndufa11	NADH dehydrogenase (ubiquinone) 1 alpha subcomplex 11 [Source:MGI Symbol;Acc:MGI:1917125]	1.75202	8.30973	97.5719	5.19347e-23	3.92674e-21
ENSMUSG00000034324	208213	Tmem132c	transmembrane protein 132C [Source:MGI Symbol;Acc:MGI:2443061]	1.86618	3.44127	97.5402	5.27733e-23	3.97209e-21
ENSMUSG00000047907	228911	Tshz2	teashirt zinc finger family member 2 [Source:MGI Symbol;Acc:MGI:2153084]	-2.20052	4.38096	97.472	5.46221e-23	4.09272e-21
ENSMUSG00000021262	14026	Evl	Ena-vasodilator stimulated phosphoprotein [Source:MGI Symbol;Acc:MGI:1194884]	1.68112	4.30739	97.3952	5.67827e-23	4.23553e-21
ENSMUSG00000050705	69662	2310061I04Rik	RIKEN cDNA 2310061I04 gene [Source:MGI Symbol;Acc:MGI:1916912]	1.38501	5.20033	97.3445	5.82561e-23	4.32603e-21
ENSMUSG00000051107	NA	Gm15440	predicted gene 15440 [Source:MGI Symbol;Acc:MGI:3642353]	-1.98935	5.85695	97.1713	6.35807e-23	4.70045e-21
ENSMUSG00000036199	67184	Ndufa13	NADH dehydrogenase (ubiquinone) 1 alpha subcomplex, 13 [Source:MGI Symbol;Acc:MGI:1914434]	1.81101	8.2986	97.0135	6.88556e-23	5.06789e-21
ENSMUSG00000027309	228602	4930402H24Rik	RIKEN cDNA 4930402H24 gene [Source:MGI Symbol;Acc:MGI:1923029]	-1.64175	6.82772	96.9468	7.12158e-23	5.21852e-21
ENSMUSG00000046593	320500	Tmem215	transmembrane protein 215 [Source:MGI Symbol;Acc:MGI:2444167]	-2.16415	4.75678	96.6878	8.11667e-23	5.92161e-21
ENSMUSG00000025270	11656	Alas2	aminolevulinic acid synthase 2, erythroid [Source:MGI Symbol;Acc:MGI:87990]	-3.31493	2.71629	96.529	8.79455e-23	6.38814e-21
ENSMUSG00000024985	21416	Tcf7l2	transcription factor 7 like 2, T cell specific, HMG box [Source:MGI Symbol;Acc:MGI:1202879]	-2.15187	5.21044	96.3692	9.53408e-23	6.89521e-21
ENSMUSG00000027673	66046	Ndufb5	NADH dehydrogenase (ubiquinone) 1 beta subcomplex, 5 [Source:MGI Symbol;Acc:MGI:1913296]	1.72686	8.61641	96.3592	9.58214e-23	6.89997e-21
ENSMUSG00000032840	76792	2410131K14Rik	RIKEN cDNA 2410131K14 gene [Source:MGI Symbol;Acc:MGI:1924042]	1.36578	4.79878	96.1943	1.04143e-22	7.46688e-21
ENSMUSG00000040118	12293	Cacna2d1	calcium channel, voltage-dependent, alpha2/delta subunit 1 [Source:MGI Symbol;Acc:MGI:88295]	-2.30871	8.54886	96.1728	1.0528e-22	7.49434e-21
ENSMUSG00000054871	72309	Tmem158	transmembrane protein 158 [Source:MGI Symbol;Acc:MGI:1919559]	1.6999	4.31119	96.1701	1.05427e-22	7.49434e-21
ENSMUSG00000040624	213783	Plekhg1	pleckstrin homology domain containing, family G (with RhoGef domain) member 1 [Source:MGI Symbol;Acc:MGI:2676551]	-2.21716	4.14408	96.0948	1.09512e-22	7.75156e-21
ENSMUSG00000020183	70574	Cpm	carboxypeptidase M [Source:MGI Symbol;Acc:MGI:1917824]	-2.04583	4.07738	95.8953	1.21124e-22	8.50306e-21
ENSMUSG00000033965	20502	Slc16a2	solute carrier family 16 (monocarboxylic acid transporters), member 2 [Source:MGI Symbol;Acc:MGI:1203732]	-1.61709	6.55347	95.8948	1.21151e-22	8.50306e-21
ENSMUSG00000030522	233315	Mtmr10	myotubularin related protein 10 [Source:MGI Symbol;Acc:MGI:2142292]	-2.35427	3.38844	95.7467	1.30562e-22	9.12506e-21
ENSMUSG00000071654	107197	Uqcc3	ubiquinol-cytochrome c reductase complex assembly factor 3 [Source:MGI Symbol;Acc:MGI:2147553]	1.58184	5.56292	95.4956	1.48224e-22	1.03161e-20
ENSMUSG00000030647	68197	Ndufc2	NADH dehydrogenase (ubiquinone) 1, subcomplex unknown, 2 [Source:MGI Symbol;Acc:MGI:1344370]	1.5881	7.66198	95.429	1.5329e-22	1.06243e-20
ENSMUSG00000001707	66143	Eef1e1	eukaryotic translation elongation factor 1 epsilon 1 [Source:MGI Symbol;Acc:MGI:1913393]	1.57841	6.12096	94.9194	1.98301e-22	1.36331e-20
ENSMUSG00000059742	170738	Kcnh7	potassium voltage-gated channel, subfamily H (eag-related), member 7 [Source:MGI Symbol;Acc:MGI:2159566]	-1.95461	7.07253	94.919	1.98341e-22	1.36331e-20
ENSMUSG00000028082	27059	Sh3d19	SH3 domain protein D19 [Source:MGI Symbol;Acc:MGI:1350923]	-1.82832	3.34999	94.8837	2.01902e-22	1.38207e-20
ENSMUSG00000056966	118446	Gjc3	gap junction protein, gamma 3 [Source:MGI Symbol;Acc:MGI:2153041]	-2.80502	5.65215	94.3906	2.5902e-22	1.7658e-20
ENSMUSG00000059187	320265	Fam19a1	family with sequence similarity 19, member A1 [Source:MGI Symbol;Acc:MGI:2443695]	-2.51816	6.49416	94.2208	2.82222e-22	1.91611e-20
ENSMUSG00000037523	228607	Mavs	mitochondrial antiviral signaling protein [Source:MGI Symbol;Acc:MGI:2444773]	-2.22337	3.02205	94.0204	3.12284e-22	2.1116e-20
ENSMUSG00000030660	18704	Pik3c2a	phosphatidylinositol 3-kinase, C2 domain containing, alpha polypeptide [Source:MGI Symbol;Acc:MGI:1203729]	-1.94728	3.73884	93.8829	3.3475e-22	2.25434e-20
ENSMUSG00000037499	66208	Nenf	neuron derived neurotrophic factor [Source:MGI Symbol;Acc:MGI:1913458]	1.45753	5.40679	93.6734	3.72135e-22	2.496e-20
ENSMUSG00000032959	23980	Pebp1	phosphatidylethanolamine binding protein 1 [Source:MGI Symbol;Acc:MGI:1344408]	1.48088	6.35045	93.5993	3.8633e-22	2.58081e-20
ENSMUSG00000021392	70930	Nol8	nucleolar protein 8 [Source:MGI Symbol;Acc:MGI:1918180]	1.38702	5.69704	93.5287	4.00343e-22	2.66373e-20
ENSMUSG00000037031	70423	Tspan15	tetraspanin 15 [Source:MGI Symbol;Acc:MGI:1917673]	-2.74353	4.2097	93.1656	4.80971e-22	3.18744e-20
ENSMUSG00000034701	18012	Neurod1	neurogenic differentiation 1 [Source:MGI Symbol;Acc:MGI:1339708]	-2.82065	3.57944	92.8955	5.51304e-22	3.63905e-20
ENSMUSG00000021278	93835	Amn	amnionless [Source:MGI Symbol;Acc:MGI:1934943]	1.84313	3.21628	92.7878	5.82122e-22	3.82728e-20
ENSMUSG00000038393	56338	Txnip	thioredoxin interacting protein [Source:MGI Symbol;Acc:MGI:1889549]	-2.36576	3.43502	92.7662	5.88529e-22	3.85417e-20
ENSMUSG00000040865	227195	Ino80d	INO80 complex subunit D [Source:MGI Symbol;Acc:MGI:3027003]	-1.37366	4.27022	92.5644	6.51697e-22	4.25111e-20
ENSMUSG00000024006	106504	Stk38	serine/threonine kinase 38 [Source:MGI Symbol;Acc:MGI:2442572]	-1.84749	4.51675	92.5019	6.72585e-22	4.37023e-20
ENSMUSG00000042750	12069	Bex2	brain expressed X-linked 2 [Source:MGI Symbol;Acc:MGI:1338017]	1.74805	8.04979	92.485	6.78363e-22	4.39062e-20
ENSMUSG00000003072	66043	Atp5d	ATP synthase, H+ transporting, mitochondrial F1 complex, delta subunit [Source:MGI Symbol;Acc:MGI:1913293]	1.68944	7.43816	92.4391	6.94297e-22	4.47633e-20
ENSMUSG00000035456	77630	Prdm8	PR domain containing 8 [Source:MGI Symbol;Acc:MGI:1924880]	-2.13973	3.83852	92.3898	7.11793e-22	4.57141e-20
ENSMUSG00000025810	18186	Nrp1	neuropilin 1 [Source:MGI Symbol;Acc:MGI:106206]	-2.00202	6.1392	92.2868	7.49816e-22	4.79709e-20
ENSMUSG00000050473	76157	Slc35d3	solute carrier family 35, member D3 [Source:MGI Symbol;Acc:MGI:1923407]	2.1162	2.68456	92.1048	8.22037e-22	5.23899e-20
ENSMUSG00000042599	338523	Kdm7a	lysine (K)-specific demethylase 7A [Source:MGI Symbol;Acc:MGI:2443388]	-1.27191	5.29291	92.0578	8.4182e-22	5.34459e-20
ENSMUSG00000036533	260409	Cdc42ep3	CDC42 effector protein (Rho GTPase binding) 3 [Source:MGI Symbol;Acc:MGI:2384718]	1.77226	4.62268	92.0358	8.51234e-22	5.38381e-20
ENSMUSG00000022450	67130	Ndufa6	NADH dehydrogenase (ubiquinone) 1 alpha subcomplex, 6 (B14) [Source:MGI Symbol;Acc:MGI:1914380]	1.90556	8.15218	91.9934	8.69665e-22	5.47955e-20
ENSMUSG00000015882	209707	Lcorl	ligand dependent nuclear receptor corepressor-like [Source:MGI Symbol;Acc:MGI:2651932]	-1.76527	4.10386	91.9462	8.90661e-22	5.59066e-20
ENSMUSG00000020841	12874	Cpd	carboxypeptidase D [Source:MGI Symbol;Acc:MGI:107265]	-1.6661	6.51085	91.8084	9.54865e-22	5.97114e-20
ENSMUSG00000002768	17256	Mea1	male enhanced antigen 1 [Source:MGI Symbol;Acc:MGI:96957]	1.47456	6.63471	91.6737	1.02214e-21	6.36305e-20
ENSMUSG00000050967	263764	Creg2	cellular repressor of E1A-stimulated genes 2 [Source:MGI Symbol;Acc:MGI:1928333]	-1.60884	6.49323	91.6678	1.02519e-21	6.36305e-20
ENSMUSG00000035293	217558	G2e3	G2/M-phase specific E3 ubiquitin ligase [Source:MGI Symbol;Acc:MGI:2444298]	-2.06791	3.28826	91.5657	1.07948e-21	6.6751e-20
ENSMUSG00000026023	271697	Cdk15	cyclin-dependent kinase 15 [Source:MGI Symbol;Acc:MGI:3583944]	2.78262	1.10975	91.4815	1.12643e-21	6.93964e-20
ENSMUSG00000030729	70974	Pgm2l1	phosphoglucomutase 2-like 1 [Source:MGI Symbol;Acc:MGI:1918224]	-1.9221	8.41365	91.2591	1.26039e-21	7.73631e-20
ENSMUSG00000025321	320910	Itgb8	integrin beta 8 [Source:MGI Symbol;Acc:MGI:1338035]	-2.68401	5.21077	91.1523	1.33029e-21	8.12379e-20
ENSMUSG00000029600	100764	Rita1	RBPJ interacting and tubulin associated 1 [Source:MGI Symbol;Acc:MGI:1922021]	1.55785	3.76854	91.1478	1.33329e-21	8.12379e-20
ENSMUSG00000010406	68836	Mrpl52	mitochondrial ribosomal protein L52 [Source:MGI Symbol;Acc:MGI:1916086]	1.89887	4.77651	90.722	1.65342e-21	1.00376e-19
ENSMUSG00000042737	68563	Dpm3	dolichyl-phosphate mannosyltransferase polypeptide 3 [Source:MGI Symbol;Acc:MGI:1915813]	1.66221	5.24773	90.6146	1.7457e-21	1.05593e-19
ENSMUSG00000021647	27220	Cartpt	CART prepropeptide [Source:MGI Symbol;Acc:MGI:1351330]	2.29838	4.57656	90.5867	1.77044e-21	1.06372e-19
ENSMUSG00000062300	19294	Nectin2	nectin cell adhesion molecule 2 [Source:MGI Symbol;Acc:MGI:97822]	2.21582	2.82595	90.5857	1.77138e-21	1.06372e-19
ENSMUSG00000014361	17289	Mertk	c-mer proto-oncogene tyrosine kinase [Source:MGI Symbol;Acc:MGI:96965]	-2.70578	5.4315	90.5041	1.84593e-21	1.10451e-19
ENSMUSG00000015092	59022	Edf1	endothelial differentiation-related factor 1 [Source:MGI Symbol;Acc:MGI:1891227]	1.83576	5.66691	90.4387	1.90793e-21	1.13751e-19
ENSMUSG00000043673	238076	Kcns3	potassium voltage-gated channel, delayed-rectifier, subfamily S, member 3 [Source:MGI Symbol;Acc:MGI:1098804]	2.20959	4.48642	90.3479	1.99757e-21	1.1867e-19
ENSMUSG00000055639	13134	Dach1	dachshund 1 (Drosophila) [Source:MGI Symbol;Acc:MGI:1277991]	1.73689	3.29187	90.2955	2.05119e-21	1.21422e-19
ENSMUSG00000038845	18673	Phb	prohibitin [Source:MGI Symbol;Acc:MGI:97572]	1.5396	4.77288	90.2785	2.06884e-21	1.22032e-19
ENSMUSG00000037685	11980	Atp8a1	ATPase, aminophospholipid transporter (APLT), class I, type 8A, member 1 [Source:MGI Symbol;Acc:MGI:1330848]	-1.72808	8.62085	90.256	2.09252e-21	1.22993e-19
ENSMUSG00000018770	228033	Atp5g3	ATP synthase, H+ transporting, mitochondrial F0 complex, subunit C3 (subunit 9) [Source:MGI Symbol;Acc:MGI:2442035]	2.11054	9.24484	90.1923	2.161e-21	1.26571e-19
ENSMUSG00000030002	72102	Dusp11	dual specificity phosphatase 11 (RNA/RNP complex 1-interacting) [Source:MGI Symbol;Acc:MGI:1919352]	-1.82352	4.62167	90.1609	2.19554e-21	1.28143e-19
ENSMUSG00000056629	14227	Fkbp2	FK506 binding protein 2 [Source:MGI Symbol;Acc:MGI:95542]	1.74886	5.90452	90.0878	2.27819e-21	1.32502e-19
ENSMUSG00000070867	666048	Trabd2b	TraB domain containing 2B [Source:MGI Symbol;Acc:MGI:3650152]	-2.88744	3.16184	90.04	2.33398e-21	1.35273e-19
ENSMUSG00000024776	76630	Stambpl1	STAM binding protein like 1 [Source:MGI Symbol;Acc:MGI:1923880]	1.48244	4.5579	90.0322	2.34316e-21	1.35334e-19
ENSMUSG00000020843	56322	Timm22	translocase of inner mitochondrial membrane 22 [Source:MGI Symbol;Acc:MGI:1929742]	1.24775	5.86708	90.0145	2.36426e-21	1.3608e-19
ENSMUSG00000045071	230259	E130308A19Rik	RIKEN cDNA E130308A19 gene [Source:MGI Symbol;Acc:MGI:2442164]	-1.38411	3.75628	89.9961	2.38633e-21	1.36877e-19
ENSMUSG00000027581	20262	Stmn3	stathmin-like 3 [Source:MGI Symbol;Acc:MGI:1277137]	1.6258	9.1328	89.8947	2.51175e-21	1.43576e-19
ENSMUSG00000023026	239667	Dip2b	disco interacting protein 2 homolog B [Source:MGI Symbol;Acc:MGI:2145977]	-1.21382	6.15316	89.7702	2.67497e-21	1.52382e-19
ENSMUSG00000001666	13202	Ddt	D-dopachrome tautomerase [Source:MGI Symbol;Acc:MGI:1298381]	1.98282	4.58387	89.7373	2.71981e-21	1.54407e-19
ENSMUSG00000022217	85308	Emc9	ER membrane protein complex subunit 9 [Source:MGI Symbol;Acc:MGI:1934682]	1.40371	3.88776	89.6375	2.86053e-21	1.61844e-19
ENSMUSG00000038205	108097	Prkab2	protein kinase, AMP-activated, beta 2 non-catalytic subunit [Source:MGI Symbol;Acc:MGI:1336185]	-1.44077	5.18871	89.4363	3.16673e-21	1.78561e-19
ENSMUSG00000032263	12040	Bckdhb	branched chain ketoacid dehydrogenase E1, beta polypeptide [Source:MGI Symbol;Acc:MGI:88137]	1.63579	4.75089	89.3056	3.38301e-21	1.90111e-19
ENSMUSG00000021696	74559	Elovl7	ELOVL family member 7, elongation of long chain fatty acids (yeast) [Source:MGI Symbol;Acc:MGI:1921809]	-2.3046	5.09581	89.23	3.51486e-21	1.96856e-19
ENSMUSG00000034462	18764	Pkd2	polycystic kidney disease 2 [Source:MGI Symbol;Acc:MGI:1099818]	-1.56622	4.30416	89.1882	3.58987e-21	2.00382e-19
ENSMUSG00000020721	78455	Helz	helicase with zinc finger domain [Source:MGI Symbol;Acc:MGI:1925705]	-1.27368	6.22205	89.0419	3.86536e-21	2.15038e-19
ENSMUSG00000039154	20420	Shd	src homology 2 domain-containing transforming protein D [Source:MGI Symbol;Acc:MGI:1099461]	1.92088	3.80089	88.9561	4.0367e-21	2.23821e-19
ENSMUSG00000027859	18049	Ngf	nerve growth factor [Source:MGI Symbol;Acc:MGI:97321]	2.56937	3.68367	88.8925	4.16857e-21	2.30365e-19
ENSMUSG00000024038	78330	Ndufv3	NADH dehydrogenase (ubiquinone) flavoprotein 3 [Source:MGI Symbol;Acc:MGI:1890894]	1.80457	7.86252	88.6192	4.78613e-21	2.63618e-19
ENSMUSG00000021102	73046	Glrx5	glutaredoxin 5 [Source:MGI Symbol;Acc:MGI:1920296]	1.93212	4.75669	88.4253	5.27914e-21	2.89813e-19
ENSMUSG00000031534	102032	Smim19	small integral membrane protein 19 [Source:MGI Symbol;Acc:MGI:2142501]	1.51625	5.1301	88.2763	5.69222e-21	3.11462e-19
ENSMUSG00000015243	11303	Abca1	ATP-binding cassette, sub-family A (ABC1), member 1 [Source:MGI Symbol;Acc:MGI:99607]	-1.94035	4.88775	88.2637	5.72851e-21	3.11688e-19
ENSMUSG00000028521	242585	Slc35d1	solute carrier family 35 (UDP-glucuronic acid/UDP-N-acetylgalactosamine dual transporter), member D1 [Source:MGI Symbol;Acc:MGI:2140361]	-1.62373	4.16242	88.2603	5.73844e-21	3.11688e-19
ENSMUSG00000079669	NA	Gm17396	predicted gene, 17396 [Source:MGI Symbol;Acc:MGI:4937030]	2.82602	2.46271	88.2554	5.75257e-21	3.11688e-19
ENSMUSG00000031059	104130	Ndufb11	NADH dehydrogenase (ubiquinone) 1 beta subcomplex, 11 [Source:MGI Symbol;Acc:MGI:1349919]	1.6196	7.66151	88.2017	5.91084e-21	3.19224e-19
ENSMUSG00000021738	246103	Atxn7	ataxin 7 [Source:MGI Symbol;Acc:MGI:2179277]	-1.56089	3.91088	88.1694	6.0083e-21	3.23437e-19
ENSMUSG00000022452	69029	Smdt1	single-pass membrane protein with aspartate rich tail 1 [Source:MGI Symbol;Acc:MGI:1916279]	1.91109	6.43448	88.1504	6.06632e-21	3.25507e-19
ENSMUSG00000055839	67673	Elob	elongin B [Source:MGI Symbol;Acc:MGI:1914923]	1.64308	7.46259	88.1341	6.11631e-21	3.27134e-19
ENSMUSG00000037610	72413	Kcnmb2	potassium large conductance calcium-activated channel, subfamily M, beta member 2 [Source:MGI Symbol;Acc:MGI:1919663]	2.60006	3.8584	88.0582	6.35558e-21	3.38842e-19
ENSMUSG00000014243	69747	Zswim7	zinc finger SWIM-type containing 7 [Source:MGI Symbol;Acc:MGI:1916997]	1.41701	4.09433	88.0248	6.46393e-21	3.43518e-19
ENSMUSG00000049184	75029	Purg	purine-rich element binding protein G [Source:MGI Symbol;Acc:MGI:1922279]	-1.6557	4.53944	87.987	6.5886e-21	3.49028e-19
ENSMUSG00000024194	67675	Cuta	cutA divalent cation tolerance homolog [Source:MGI Symbol;Acc:MGI:1914925]	1.33535	6.53301	87.9543	6.69857e-21	3.53727e-19
ENSMUSG00000034402	238271	Kcnh5	potassium voltage-gated channel, subfamily H (eag-related), member 5 [Source:MGI Symbol;Acc:MGI:3584508]	-1.93609	3.50771	87.899	6.88832e-21	3.62596e-19
ENSMUSG00000003380	14470	Rabac1	Rab acceptor 1 (prenylated) [Source:MGI Symbol;Acc:MGI:1201692]	1.46295	7.6445	87.7632	7.37776e-21	3.86924e-19
ENSMUSG00000032340	18007	Neo1	neogenin [Source:MGI Symbol;Acc:MGI:1097159]	-1.68078	6.37951	87.7581	7.39701e-21	3.86924e-19
ENSMUSG00000087006	620695	Gm13889	predicted gene 13889 [Source:MGI Symbol;Acc:MGI:3652053]	2.0807	2.8974	87.7266	7.51584e-21	3.91908e-19
ENSMUSG00000020098	13180	Pcbd1	pterin 4 alpha carbinolamine dehydratase/dimerization cofactor of hepatocyte nuclear factor 1 alpha (TCF1) 1 [Source:MGI Symbol;Acc:MGI:94873]	2.17196	2.95958	87.6496	7.81387e-21	4.06174e-19
ENSMUSG00000022678	67203	Nde1	nudE neurodevelopment protein 1 [Source:MGI Symbol;Acc:MGI:1914453]	-2.71414	4.8452	87.5256	8.31959e-21	4.31115e-19
ENSMUSG00000034773	217216	BC030867	cDNA sequence BC030867 [Source:MGI Symbol;Acc:MGI:2387601]	2.45789	1.80149	87.5168	8.35661e-21	4.31689e-19
ENSMUSG00000036611	67484	Eepd1	endonuclease/exonuclease/phosphatase family domain containing 1 [Source:MGI Symbol;Acc:MGI:1914734]	1.39042	4.58537	87.5078	8.39482e-21	4.3232e-19
ENSMUSG00000037234	320191	Hook3	hook microtubule tethering protein 3 [Source:MGI Symbol;Acc:MGI:2443554]	-1.22218	5.77119	87.4294	8.73446e-21	4.48423e-19
ENSMUSG00000036699	72693	Zcchc12	zinc finger, CCHC domain containing 12 [Source:MGI Symbol;Acc:MGI:1919943]	2.51974	6.61718	87.2743	9.44687e-21	4.83505e-19
ENSMUSG00000030652	12850	Coq7	demethyl-Q 7 [Source:MGI Symbol;Acc:MGI:107207]	1.40352	5.95754	87.1066	1.02826e-20	5.23903e-19
ENSMUSG00000006390	54325	Elovl1	elongation of very long chain fatty acids (FEN1/Elo2, SUR4/Elo3, yeast)-like 1 [Source:MGI Symbol;Acc:MGI:1858959]	-2.60407	5.11035	87.1034	1.02992e-20	5.23903e-19
ENSMUSG00000031385	140571	Plxnb3	plexin B3 [Source:MGI Symbol;Acc:MGI:2154240]	-2.67484	4.11037	87.0614	1.05204e-20	5.33524e-19
ENSMUSG00000043419	NA	Chd3os	chromodomain helicase DNA binding protein 3, opposite strand [Source:MGI Symbol;Acc:MGI:1915359]	1.72055	7.20055	87.043	1.06185e-20	5.36865e-19
ENSMUSG00000068966	241311	Zbtb34	zinc finger and BTB domain containing 34 [Source:MGI Symbol;Acc:MGI:2685195]	-1.59518	3.15507	86.9278	1.12556e-20	5.67353e-19
ENSMUSG00000042675	66090	Ypel3	yippee-like 3 (Drosophila) [Source:MGI Symbol;Acc:MGI:1913340]	1.97287	6.80714	86.8172	1.19032e-20	5.9818e-19
ENSMUSG00000003955	70186	Fam162a	family with sequence similarity 162, member A [Source:MGI Symbol;Acc:MGI:1917436]	1.73972	5.5309	86.7614	1.22438e-20	6.13444e-19
ENSMUSG00000033845	27395	Mrpl15	mitochondrial ribosomal protein L15 [Source:MGI Symbol;Acc:MGI:1351639]	1.24039	5.58544	86.748	1.23271e-20	6.15765e-19
ENSMUSG00000026768	241226	Itga8	integrin alpha 8 [Source:MGI Symbol;Acc:MGI:109442]	-3.13567	1.66445	86.6438	1.29935e-20	6.47109e-19
ENSMUSG00000020153	75406	Ndufs7	NADH dehydrogenase (ubiquinone) Fe-S protein 7 [Source:MGI Symbol;Acc:MGI:1922656]	1.44083	7.86853	86.5921	1.3338e-20	6.62279e-19
ENSMUSG00000090063	NA	Dlx6os1	distal-less homeobox 6, opposite strand 1 [Source:MGI Symbol;Acc:MGI:2443217]	2.18504	5.10499	86.5581	1.35691e-20	6.71752e-19
ENSMUSG00000090223	18546	Pcp4	Purkinje cell protein 4 [Source:MGI Symbol;Acc:MGI:97509]	2.08413	9.03022	86.5503	1.36229e-20	6.72413e-19
ENSMUSG00000068551	68910	Zfp467	zinc finger protein 467 [Source:MGI Symbol;Acc:MGI:1916160]	2.12686	3.67877	86.3193	1.53111e-20	7.53504e-19
ENSMUSG00000022231	20356	Sema5a	sema domain, seven thrombospondin repeats (type 1 and type 1-like), transmembrane domain (TM) and short cytoplasmic domain, (semaphorin) 5A [Source:MGI Symbol;Acc:MGI:107556]	-1.38038	6.68479	86.298	1.54764e-20	7.59394e-19
ENSMUSG00000033386	20321	Frrs1	ferric-chelate reductase 1 [Source:MGI Symbol;Acc:MGI:108076]	-4.41901	1.10564	86.2651	1.57361e-20	7.69866e-19
ENSMUSG00000067879	76982	3110035E14Rik	RIKEN cDNA 3110035E14 gene [Source:MGI Symbol;Acc:MGI:1924232]	-2.42673	7.62316	86.2355	1.59731e-20	7.7917e-19
ENSMUSG00000063626	210801	Unc5d	unc-5 netrin receptor D [Source:MGI Symbol;Acc:MGI:2389364]	-1.47311	6.26051	86.2031	1.62374e-20	7.89744e-19
ENSMUSG00000028013	74776	Ppa2	pyrophosphatase (inorganic) 2 [Source:MGI Symbol;Acc:MGI:1922026]	1.24751	5.61619	86.165	1.65534e-20	8.02768e-19
ENSMUSG00000040133	381413	Gpr176	G protein-coupled receptor 176 [Source:MGI Symbol;Acc:MGI:2685858]	1.65942	4.90492	86.0994	1.71111e-20	8.27401e-19
ENSMUSG00000010066	56808	Cacna2d2	calcium channel, voltage-dependent, alpha 2/delta subunit 2 [Source:MGI Symbol;Acc:MGI:1929813]	1.63108	4.74272	86.0818	1.72641e-20	8.32382e-19
ENSMUSG00000031990	83964	Jam3	junction adhesion molecule 3 [Source:MGI Symbol;Acc:MGI:1933825]	-2.34733	5.47896	86.0443	1.75952e-20	8.45893e-19
ENSMUSG00000020089	67895	Ppa1	pyrophosphatase (inorganic) 1 [Source:MGI Symbol;Acc:MGI:97831]	1.28485	6.89219	86.0112	1.78917e-20	8.57669e-19
ENSMUSG00000052726	240776	Kcnt2	potassium channel, subfamily T, member 2 [Source:MGI Symbol;Acc:MGI:3036273]	-2.09625	4.83352	85.9746	1.82259e-20	8.71175e-19
ENSMUSG00000022489	18574	Pde1b	phosphodiesterase 1B, Ca2+-calmodulin dependent [Source:MGI Symbol;Acc:MGI:97523]	1.8114	5.98856	85.9323	1.86205e-20	8.87487e-19
ENSMUSG00000070283	66706	Ndufaf3	NADH dehydrogenase (ubiquinone) 1 alpha subcomplex, assembly factor 3 [Source:MGI Symbol;Acc:MGI:1913956]	1.17185	5.6381	85.9047	1.88817e-20	8.97365e-19
ENSMUSG00000059588	54598	Calcrl	calcitonin receptor-like [Source:MGI Symbol;Acc:MGI:1926944]	-2.66038	2.14013	85.7191	2.07395e-20	9.82852e-19
ENSMUSG00000059412	11936	Fxyd2	FXYD domain-containing ion transport regulator 2 [Source:MGI Symbol;Acc:MGI:1195260]	2.23632	3.73932	85.6694	2.12676e-20	1.00501e-18
ENSMUSG00000086606	NA	Gm13205	predicted gene 13205 [Source:MGI Symbol;Acc:MGI:3700976]	1.70117	2.78472	85.4606	2.36364e-20	1.11379e-18
ENSMUSG00000029086	19126	Prom1	prominin 1 [Source:MGI Symbol;Acc:MGI:1100886]	-2.46538	4.50313	85.4112	2.42348e-20	1.13876e-18
ENSMUSG00000000253	66355	Gmpr	guanosine monophosphate reductase [Source:MGI Symbol;Acc:MGI:1913605]	1.25445	5.39491	85.35	2.49958e-20	1.17121e-18
ENSMUSG00000024008	240058	Cpne5	copine V [Source:MGI Symbol;Acc:MGI:2385908]	1.39591	6.58789	85.3085	2.55264e-20	1.19271e-18
ENSMUSG00000040125	233919	Gpr26	G protein-coupled receptor 26 [Source:MGI Symbol;Acc:MGI:2441758]	-1.54711	6.95671	85.261	2.61473e-20	1.2183e-18
ENSMUSG00000021773	69156	Comtd1	catechol-O-methyltransferase domain containing 1 [Source:MGI Symbol;Acc:MGI:1916406]	1.79002	2.25411	85.1703	2.7374e-20	1.2719e-18
ENSMUSG00000040452	215654	Cdh12	cadherin 12 [Source:MGI Symbol;Acc:MGI:109503]	-1.60215	5.84027	85.1237	2.80266e-20	1.29859e-18
ENSMUSG00000046922	140741	Gpr6	G protein-coupled receptor 6 [Source:MGI Symbol;Acc:MGI:2155249]	2.58126	4.77943	85.1027	2.83267e-20	1.30885e-18
ENSMUSG00000003411	69908	Rab3b	RAB3B, member RAS oncogene family [Source:MGI Symbol;Acc:MGI:1917158]	2.37225	8.20785	85.0806	2.86452e-20	1.3199e-18
ENSMUSG00000028613	16975	Lrp8	low density lipoprotein receptor-related protein 8, apolipoprotein e receptor [Source:MGI Symbol;Acc:MGI:1340044]	-1.51373	6.0761	84.9968	2.98847e-20	1.37321e-18
ENSMUSG00000022551	66445	Cyc1	cytochrome c-1 [Source:MGI Symbol;Acc:MGI:1913695]	1.63879	7.74113	84.8877	3.15794e-20	1.44708e-18
ENSMUSG00000021770	67630	Samd8	sterile alpha motif domain containing 8 [Source:MGI Symbol;Acc:MGI:1914880]	-1.45601	7.05354	84.8413	3.23292e-20	1.47737e-18
ENSMUSG00000030310	232333	Slc6a1	solute carrier family 6 (neurotransmitter transporter, GABA), member 1 [Source:MGI Symbol;Acc:MGI:95627]	1.69653	8.96438	84.7813	3.3326e-20	1.51875e-18
ENSMUSG00000036461	13709	Elf1	E74-like factor 1 [Source:MGI Symbol;Acc:MGI:107180]	-2.09792	2.07191	84.7204	3.43683e-20	1.56197e-18
ENSMUSG00000039384	63953	Dusp10	dual specificity phosphatase 10 [Source:MGI Symbol;Acc:MGI:1927070]	1.67076	4.16525	84.5926	3.66635e-20	1.66175e-18
ENSMUSG00000045573	18619	Penk	preproenkephalin [Source:MGI Symbol;Acc:MGI:104629]	2.99424	10.0258	84.5811	3.6878e-20	1.66693e-18
ENSMUSG00000034297	327987	Med13	mediator complex subunit 13 [Source:MGI Symbol;Acc:MGI:3029632]	-1.29919	5.65977	84.5103	3.82221e-20	1.723e-18
ENSMUSG00000044628	68846	Rnf208	ring finger protein 208 [Source:MGI Symbol;Acc:MGI:1916096]	1.41702	6.79883	84.328	4.1914e-20	1.88432e-18
ENSMUSG00000029875	239650	Ccdc184	coiled-coil domain containing 184 [Source:MGI Symbol;Acc:MGI:2146066]	1.63871	4.59972	84.2396	4.38297e-20	1.96513e-18
ENSMUSG00000044550	594844	Tceal3	transcription elongation factor A (SII)-like 3 [Source:MGI Symbol;Acc:MGI:1913354]	1.47455	4.52836	83.9691	5.02563e-20	2.24722e-18
ENSMUSG00000019428	14232	Fkbp8	FK506 binding protein 8 [Source:MGI Symbol;Acc:MGI:1341070]	1.45943	6.86759	83.9332	5.1177e-20	2.28225e-18
ENSMUSG00000055541	52855	Lair1	leukocyte-associated Ig-like receptor 1 [Source:MGI Symbol;Acc:MGI:105492]	-1.92491	4.14516	83.8939	5.22064e-20	2.32193e-18
ENSMUSG00000021508	57266	Cxcl14	chemokine (C-X-C motif) ligand 14 [Source:MGI Symbol;Acc:MGI:1888514]	1.95322	6.67242	83.7942	5.49059e-20	2.43548e-18
ENSMUSG00000024074	50766	Crim1	cysteine rich transmembrane BMP regulator 1 (chordin like) [Source:MGI Symbol;Acc:MGI:1354756]	-1.63286	5.78244	83.7627	5.57862e-20	2.46794e-18
ENSMUSG00000037428	381677	Vgf	VGF nerve growth factor inducible [Source:MGI Symbol;Acc:MGI:1343180]	1.79817	6.10929	83.6718	5.84137e-20	2.57733e-18
ENSMUSG00000024754	83921	Tmem2	transmembrane protein 2 [Source:MGI Symbol;Acc:MGI:1890373]	-1.68034	5.06703	83.5952	6.07189e-20	2.67195e-18
ENSMUSG00000042671	67792	Rgs8	regulator of G-protein signaling 8 [Source:MGI Symbol;Acc:MGI:108408]	1.19446	5.29604	83.5463	6.22395e-20	2.73164e-18
ENSMUSG00000028403	68268	Zdhhc21	zinc finger, DHHC domain containing 21 [Source:MGI Symbol;Acc:MGI:1915518]	-1.302	6.13449	83.4395	6.56974e-20	2.87582e-18
ENSMUSG00000037280	207839	Galnt6	UDP-N-acetyl-alpha-D-galactosamine:polypeptide N-acetylgalactosaminyltransferase 6 [Source:MGI Symbol;Acc:MGI:1891640]	-2.46974	2.5903	83.3463	6.88691e-20	3.00674e-18
ENSMUSG00000052584	72661	Serp2	stress-associated endoplasmic reticulum protein family member 2 [Source:MGI Symbol;Acc:MGI:1919911]	1.80333	4.89089	83.3128	7.00448e-20	3.05006e-18
ENSMUSG00000016487	67533	Ppfibp1	PTPRF interacting protein, binding protein 1 (liprin beta 1) [Source:MGI Symbol;Acc:MGI:1914783]	-1.92928	4.42928	83.2996	7.0513e-20	3.06244e-18
ENSMUSG00000039960	69581	Rhou	ras homolog family member U [Source:MGI Symbol;Acc:MGI:1916831]	-1.87938	5.47472	83.2662	7.17162e-20	3.10658e-18
ENSMUSG00000027858	70747	Tspan2	tetraspanin 2 [Source:MGI Symbol;Acc:MGI:1917997]	-1.92269	7.84867	83.1906	7.45095e-20	3.2192e-18
ENSMUSG00000015202	215748	Cnksr3	Cnksr family member 3 [Source:MGI Symbol;Acc:MGI:2674130]	-2.45365	3.02514	83.1357	7.66109e-20	3.30141e-18
ENSMUSG00000021747	74430	4930452B06Rik	RIKEN cDNA 4930452B06 gene [Source:MGI Symbol;Acc:MGI:1926154]	1.67289	3.76344	82.9978	8.21427e-20	3.53065e-18
ENSMUSG00000026452	20980	Syt2	synaptotagmin II [Source:MGI Symbol;Acc:MGI:99666]	1.76068	5.80934	82.9595	8.3752e-20	3.59054e-18
ENSMUSG00000044876	72667	Zfp444	zinc finger protein 444 [Source:MGI Symbol;Acc:MGI:1923365]	1.36605	3.87935	82.9532	8.4021e-20	3.59282e-18
ENSMUSG00000041431	268697	Ccnb1	cyclin B1 [Source:MGI Symbol;Acc:MGI:88302]	-2.59415	1.19764	82.8802	8.71799e-20	3.71834e-18
ENSMUSG00000033446	67168	Lpar6	lysophosphatidic acid receptor 6 [Source:MGI Symbol;Acc:MGI:1914418]	-2.49522	2.37225	82.8514	8.84597e-20	3.76327e-18
ENSMUSG00000020100	71279	Slc29a3	solute carrier family 29 (nucleoside transporters), member 3 [Source:MGI Symbol;Acc:MGI:1918529]	-2.25221	3.87319	82.8237	8.97069e-20	3.80659e-18
ENSMUSG00000034880	94065	Mrpl34	mitochondrial ribosomal protein L34 [Source:MGI Symbol;Acc:MGI:2137227]	1.82019	4.69519	82.7257	9.42681e-20	3.98996e-18
ENSMUSG00000014329	83675	Bicc1	BicC family RNA binding protein 1 [Source:MGI Symbol;Acc:MGI:1933388]	-1.95675	2.30799	82.7074	9.51457e-20	4.01689e-18
ENSMUSG00000063802	66245	Hspbp1	HSPA (heat shock 70kDa) binding protein, cytoplasmic cochaperone 1 [Source:MGI Symbol;Acc:MGI:1913495]	1.67686	5.4725	82.566	1.02198e-19	4.3037e-18
ENSMUSG00000073705	69928	Apitd1	apoptosis-inducing, TAF9-like domain 1 [Source:MGI Symbol;Acc:MGI:1917178]	2.16693	1.91763	82.5286	1.04153e-19	4.37496e-18
ENSMUSG00000040612	100039795	Ildr2	immunoglobulin-like domain containing receptor 2 [Source:MGI Symbol;Acc:MGI:1196370]	-1.73149	7.29024	82.4535	1.08185e-19	4.53288e-18
ENSMUSG00000062078	19317	Qk	quaking [Source:MGI Symbol;Acc:MGI:97837]	-2.45366	9.30349	82.365	1.13142e-19	4.72863e-18
ENSMUSG00000023904	353502	Hcfc1r1	host cell factor C1 regulator 1 (XPO1-dependent) [Source:MGI Symbol;Acc:MGI:2663619]	1.56249	6.73715	82.3065	1.16538e-19	4.85839e-18
ENSMUSG00000027602	66734	Map1lc3a	microtubule-associated protein 1 light chain 3 alpha [Source:MGI Symbol;Acc:MGI:1915661]	1.40864	6.99432	82.2784	1.18206e-19	4.91561e-18
ENSMUSG00000028461	622404	Ccdc107	coiled-coil domain containing 107 [Source:MGI Symbol;Acc:MGI:1913423]	1.63018	3.89065	82.2504	1.19896e-19	4.97344e-18
ENSMUSG00000027544	18019	Nfatc2	nuclear factor of activated T cells, cytoplasmic, calcineurin dependent 2 [Source:MGI Symbol;Acc:MGI:102463]	1.75044	3.65944	82.1633	1.25296e-19	5.18453e-18
ENSMUSG00000039640	56282	Mrpl12	mitochondrial ribosomal protein L12 [Source:MGI Symbol;Acc:MGI:1926273]	1.67582	5.30605	82.1372	1.26959e-19	5.22983e-18
ENSMUSG00000016664	23970	Pacsin2	protein kinase C and casein kinase substrate in neurons 2 [Source:MGI Symbol;Acc:MGI:1345153]	1.27594	5.53492	82.1363	1.2702e-19	5.22983e-18
ENSMUSG00000051483	12408	Cbr1	carbonyl reductase 1 [Source:MGI Symbol;Acc:MGI:88284]	1.25199	5.53215	82.097	1.29567e-19	5.32153e-18
ENSMUSG00000059474	103537	Mbtd1	mbt domain containing 1 [Source:MGI Symbol;Acc:MGI:2143977]	-1.56805	4.51236	81.9219	1.41572e-19	5.80026e-18
ENSMUSG00000084890	NA	A830036E02Rik	RIKEN cDNA A830036E02 gene [Source:MGI Symbol;Acc:MGI:3686876]	-2.49737	4.86943	81.7339	1.55698e-19	6.35812e-18
ENSMUSG00000060962	73712	Dmkn	dermokine [Source:MGI Symbol;Acc:MGI:1920962]	2.31806	4.50479	81.7307	1.55952e-19	6.35812e-18
ENSMUSG00000091811	66300	Inafm1	InaF motif containing 1 [Source:MGI Symbol;Acc:MGI:1913550]	1.66232	4.56465	81.7239	1.56493e-19	6.36454e-18
ENSMUSG00000020814	67622	Mxra7	matrix-remodelling associated 7 [Source:MGI Symbol;Acc:MGI:1914872]	1.7838	3.09347	81.708	1.57751e-19	6.40006e-18
ENSMUSG00000014599	12977	Csf1	colony stimulating factor 1 (macrophage) [Source:MGI Symbol;Acc:MGI:1339753]	-1.97131	3.03913	81.6529	1.62212e-19	6.56503e-18
ENSMUSG00000022223	654795	Sdr39u1	short chain dehydrogenase/reductase family 39U, member 1 [Source:MGI Symbol;Acc:MGI:1916876]	1.29657	6.62588	81.4658	1.78323e-19	7.19959e-18
ENSMUSG00000087141	433022	Plcxd2	phosphatidylinositol-specific phospholipase C, X domain containing 2 [Source:MGI Symbol;Acc:MGI:3647874]	-1.34596	7.04734	81.3108	1.92874e-19	7.76818e-18
ENSMUSG00000022671	72083	Mzt2	mitotic spindle organizing protein 2 [Source:MGI Symbol;Acc:MGI:1922845]	1.25916	4.79985	81.3055	1.93385e-19	7.76997e-18
ENSMUSG00000020778	69535	Ten1	TEN1 telomerase capping complex subunit [Source:MGI Symbol;Acc:MGI:1916785]	1.2169	5.22219	81.2332	2.00593e-19	8.04016e-18
ENSMUSG00000018446	12261	C1qbp	complement component 1, q subcomponent binding protein [Source:MGI Symbol;Acc:MGI:1194505]	1.53008	5.95162	81.2112	2.0284e-19	8.11066e-18
ENSMUSG00000029404	65105	Arl6ip4	ADP-ribosylation factor-like 6 interacting protein 4 [Source:MGI Symbol;Acc:MGI:1929500]	1.63371	4.80988	81.1186	2.12574e-19	8.47953e-18
ENSMUSG00000034570	170835	Inpp5j	inositol polyphosphate 5-phosphatase J [Source:MGI Symbol;Acc:MGI:2158663]	1.86149	3.17833	81.11	2.13499e-19	8.49604e-18
ENSMUSG00000045932	15958	Ifit2	interferon-induced protein with tetratricopeptide repeats 2 [Source:MGI Symbol;Acc:MGI:99449]	1.64007	3.98718	81.07	2.17868e-19	8.64918e-18
ENSMUSG00000026765	71897	Lypd6b	LY6/PLAUR domain containing 6B [Source:MGI Symbol;Acc:MGI:1919147]	1.44909	5.0524	80.9555	2.30857e-19	9.14305e-18
ENSMUSG00000032487	19225	Ptgs2	prostaglandin-endoperoxide synthase 2 [Source:MGI Symbol;Acc:MGI:97798]	-2.63993	3.23614	80.8813	2.39692e-19	9.47039e-18
ENSMUSG00000027287	20619	Snap23	synaptosomal-associated protein 23 [Source:MGI Symbol;Acc:MGI:109356]	-1.86579	3.74356	80.7079	2.61667e-19	1.03142e-17
ENSMUSG00000033105	16987	Lss	lanosterol synthase [Source:MGI Symbol;Acc:MGI:1336155]	-1.37098	5.10166	80.6526	2.69095e-19	1.05819e-17
ENSMUSG00000006057	11951	Atp5g1	ATP synthase, H+ transporting, mitochondrial F0 complex, subunit C1 (subunit 9) [Source:MGI Symbol;Acc:MGI:107653]	1.49427	5.64672	80.6127	2.74593e-19	1.07726e-17
ENSMUSG00000071547	70021	Nt5dc2	5'-nucleotidase domain containing 2 [Source:MGI Symbol;Acc:MGI:1917271]	1.81346	3.2572	80.587	2.78182e-19	1.08877e-17
ENSMUSG00000039458	268783	Mtmr12	myotubularin related protein 12 [Source:MGI Symbol;Acc:MGI:2443034]	-1.30142	4.33147	80.5554	2.82673e-19	1.10375e-17
ENSMUSG00000028412	100434	Slc44a1	solute carrier family 44, member 1 [Source:MGI Symbol;Acc:MGI:2140592]	-1.60907	7.03485	80.5169	2.88226e-19	1.1228e-17
ENSMUSG00000053835	15042	H2-T24	histocompatibility 2, T region locus 24 [Source:MGI Symbol;Acc:MGI:95958]	-2.16602	5.10578	80.5027	2.90301e-19	1.12824e-17
ENSMUSG00000032299	66199	Commd4	COMM domain containing 4 [Source:MGI Symbol;Acc:MGI:1913449]	1.10154	5.97064	80.4394	2.99761e-19	1.16229e-17
ENSMUSG00000042747	66059	Krtcap2	keratinocyte associated protein 2 [Source:MGI Symbol;Acc:MGI:1913309]	1.23697	6.27664	80.4024	3.05417e-19	1.18147e-17
ENSMUSG00000056220	18783	Pla2g4a	phospholipase A2, group IVA (cytosolic, calcium-dependent) [Source:MGI Symbol;Acc:MGI:1195256]	-2.76525	2.38035	80.3465	3.14192e-19	1.21259e-17
ENSMUSG00000097392	NA	D930016D06Rik	RIKEN cDNA D930016D06 gene [Source:MGI Symbol;Acc:MGI:2442700]	-2.48309	3.59864	80.3303	3.16781e-19	1.21975e-17
ENSMUSG00000079227	12774	Ccr5	chemokine (C-C motif) receptor 5 [Source:MGI Symbol;Acc:MGI:107182]	-2.79305	1.93874	80.2577	3.28623e-19	1.26243e-17
ENSMUSG00000046318	320924	Ccbe1	collagen and calcium binding EGF domains 1 [Source:MGI Symbol;Acc:MGI:2445053]	-2.54785	2.33203	80.2204	3.34885e-19	1.28352e-17
ENSMUSG00000024966	20867	Stip1	stress-induced phosphoprotein 1 [Source:MGI Symbol;Acc:MGI:109130]	1.16194	6.85878	80.1072	3.54645e-19	1.35613e-17
ENSMUSG00000049881	NA	2810025M15Rik	RIKEN cDNA 2810025M15 gene [Source:MGI Symbol;Acc:MGI:1917203]	1.39373	4.94504	80.0767	3.60158e-19	1.37405e-17
ENSMUSG00000074505	270120	Fat3	FAT atypical cadherin 3 [Source:MGI Symbol;Acc:MGI:2444314]	-1.83242	6.26623	79.9194	3.90002e-19	1.48338e-17
ENSMUSG00000021460	11992	Auh	AU RNA binding protein/enoyl-coenzyme A hydratase [Source:MGI Symbol;Acc:MGI:1338011]	1.32481	5.79302	79.9164	3.90599e-19	1.48338e-17
ENSMUSG00000048281	239133	Dleu7	deleted in lymphocytic leukemia, 7 [Source:MGI Symbol;Acc:MGI:2447771]	1.91121	3.31384	79.8251	4.09066e-19	1.54998e-17
ENSMUSG00000076441	11898	Ass1	argininosuccinate synthetase 1 [Source:MGI Symbol;Acc:MGI:88090]	1.67789	3.03417	79.7696	4.20707e-19	1.59047e-17
ENSMUSG00000020914	21973	Top2a	topoisomerase (DNA) II alpha [Source:MGI Symbol;Acc:MGI:98790]	-2.59228	2.33844	79.7401	4.27042e-19	1.61075e-17
ENSMUSG00000019873	28193	Reep3	receptor accessory protein 3 [Source:MGI Symbol;Acc:MGI:88930]	-2.71684	5.87174	79.7025	4.35239e-19	1.63422e-17
ENSMUSG00000042401	72832	Crtac1	cartilage acidic protein 1 [Source:MGI Symbol;Acc:MGI:1920082]	1.4102	6.80914	79.6981	4.36224e-19	1.63422e-17
ENSMUSG00000016763	64706	Scube1	signal peptide, CUB domain, EGF-like 1 [Source:MGI Symbol;Acc:MGI:1890616]	-2.56428	5.87232	79.6946	4.36991e-19	1.63422e-17
ENSMUSG00000076258	NA	Gm23935	predicted gene, 23935 [Source:MGI Symbol;Acc:MGI:5453712]	1.94571	6.20885	79.6937	4.37195e-19	1.63422e-17
ENSMUSG00000030222	232441	Rerg	RAS-like, estrogen-regulated, growth-inhibitor [Source:MGI Symbol;Acc:MGI:2665139]	2.12016	3.85576	79.6675	4.43037e-19	1.65235e-17
ENSMUSG00000020477	64660	Mrps24	mitochondrial ribosomal protein S24 [Source:MGI Symbol;Acc:MGI:1928142]	1.76543	4.40816	79.5215	4.76998e-19	1.77503e-17
ENSMUSG00000026321	21934	Tnfrsf11a	tumor necrosis factor receptor superfamily, member 11a, NFKB activator [Source:MGI Symbol;Acc:MGI:1314891]	-2.13934	2.14852	79.4705	4.8949e-19	1.81745e-17
ENSMUSG00000007613	21812	Tgfbr1	transforming growth factor, beta receptor I [Source:MGI Symbol;Acc:MGI:98728]	-1.99719	4.57713	79.4612	4.91789e-19	1.82192e-17
ENSMUSG00000002661	66400	Alkbh7	alkB homolog 7 [Source:MGI Symbol;Acc:MGI:1913650]	1.99249	2.96566	79.3108	5.3069e-19	1.96167e-17
ENSMUSG00000042246	209760	Tmc7	transmembrane channel-like gene family 7 [Source:MGI Symbol;Acc:MGI:2443317]	-2.08289	3.67805	79.2479	5.47853e-19	2.02017e-17
ENSMUSG00000097006	NA	9530082P21Rik	RIKEN cDNA 9530082P21 gene [Source:MGI Symbol;Acc:MGI:3603340]	1.36797	7.48302	79.244	5.48945e-19	2.02017e-17
ENSMUSG00000070319	53356	Eif3g	eukaryotic translation initiation factor 3, subunit G [Source:MGI Symbol;Acc:MGI:1858258]	1.33791	5.40164	79.1526	5.74933e-19	2.11113e-17
ENSMUSG00000037221	68929	Mospd3	motile sperm domain containing 3 [Source:MGI Symbol;Acc:MGI:1916179]	1.41081	4.37601	79.0122	6.17276e-19	2.26162e-17
ENSMUSG00000020022	66414	Ndufa12	NADH dehydrogenase (ubiquinone) 1 alpha subcomplex, 12 [Source:MGI Symbol;Acc:MGI:1913664]	1.83997	7.1599	78.9835	6.26315e-19	2.2897e-17
ENSMUSG00000003199	68047	Mpnd	MPN domain containing [Source:MGI Symbol;Acc:MGI:1915297]	1.51737	5.55658	78.9124	6.49243e-19	2.36422e-17
ENSMUSG00000020541	71943	Tom1l1	target of myb1-like 1 (chicken) [Source:MGI Symbol;Acc:MGI:1919193]	-1.89718	4.63918	78.9115	6.49541e-19	2.36422e-17
ENSMUSG00000023020	66379	Cox14	cytochrome c oxidase assembly protein 14 [Source:MGI Symbol;Acc:MGI:1913629]	1.52591	6.65622	78.9071	6.50995e-19	2.36433e-17
ENSMUSG00000041797	217262	Abca9	ATP-binding cassette, sub-family A (ABC1), member 9 [Source:MGI Symbol;Acc:MGI:2386796]	-2.55206	2.6133	78.8836	6.58801e-19	2.38747e-17
ENSMUSG00000009376	17295	Met	met proto-oncogene [Source:MGI Symbol;Acc:MGI:96969]	-2.3537	4.29085	78.862	6.66036e-19	2.40385e-17
ENSMUSG00000061950	70351	Ppp4r1	protein phosphatase 4, regulatory subunit 1 [Source:MGI Symbol;Acc:MGI:1917601]	-1.92694	4.52112	78.8615	6.66209e-19	2.40385e-17
ENSMUSG00000030201	16974	Lrp6	low density lipoprotein receptor-related protein 6 [Source:MGI Symbol;Acc:MGI:1298218]	-1.45293	5.12384	78.7949	6.89064e-19	2.48093e-17
ENSMUSG00000052688	226421	Rab7b	RAB7B, member RAS oncogene family [Source:MGI Symbol;Acc:MGI:2442295]	-2.52472	3.60914	78.7011	7.22566e-19	2.59593e-17
ENSMUSG00000026895	68375	Ndufa8	NADH dehydrogenase (ubiquinone) 1 alpha subcomplex, 8 [Source:MGI Symbol;Acc:MGI:1915625]	1.46461	7.7407	78.6775	7.31232e-19	2.6214e-17
ENSMUSG00000073664	269198	Nbeal1	neurobeachin like 1 [Source:MGI Symbol;Acc:MGI:2444343]	-1.70609	4.44029	78.5733	7.70833e-19	2.75743e-17
ENSMUSG00000019797	67851	1700021F05Rik	RIKEN cDNA 1700021F05 gene [Source:MGI Symbol;Acc:MGI:1915101]	1.33264	5.4165	78.5441	7.82303e-19	2.79245e-17
ENSMUSG00000092083	98741	Kcnb2	potassium voltage gated channel, Shab-related subfamily, member 2 [Source:MGI Symbol;Acc:MGI:99632]	-1.44356	5.65596	78.4546	8.18574e-19	2.91567e-17
ENSMUSG00000046727	66060	Cystm1	cysteine-rich transmembrane module containing 1 [Source:MGI Symbol;Acc:MGI:1913310]	1.50366	5.87675	78.384	8.48344e-19	3.01525e-17
ENSMUSG00000054263	16880	Lifr	leukemia inhibitory factor receptor [Source:MGI Symbol;Acc:MGI:96788]	-1.96018	5.97471	78.3425	8.66384e-19	3.07016e-17
ENSMUSG00000090841	17904	Myl6	myosin, light polypeptide 6, alkali, smooth muscle and non-muscle [Source:MGI Symbol;Acc:MGI:109318]	1.41956	6.5391	78.34	8.67485e-19	3.07016e-17
ENSMUSG00000040415	80904	Dtx3	deltex 3, E3 ubiquitin ligase [Source:MGI Symbol;Acc:MGI:2135752]	1.24433	6.65284	78.2885	8.90371e-19	3.13978e-17
ENSMUSG00000048240	14708	Gng7	guanine nucleotide binding protein (G protein), gamma 7 [Source:MGI Symbol;Acc:MGI:95787]	1.73056	8.85813	78.2873	8.90931e-19	3.13978e-17
ENSMUSG00000017291	216965	Taok1	TAO kinase 1 [Source:MGI Symbol;Acc:MGI:1914490]	-1.5949	8.9614	78.2567	9.04837e-19	3.18204e-17
ENSMUSG00000057337	53374	Chst3	carbohydrate (chondroitin 6/keratan) sulfotransferase 3 [Source:MGI Symbol;Acc:MGI:1858224]	-2.58906	2.0185	78.1129	9.73153e-19	3.40927e-17
ENSMUSG00000086596	382111	Susd5	sushi domain containing 5 [Source:MGI Symbol;Acc:MGI:2685972]	-2.38949	3.31122	78.1121	9.73551e-19	3.40927e-17
ENSMUSG00000078713	68512	Tomm5	translocase of outer mitochondrial membrane 5 homolog (yeast) [Source:MGI Symbol;Acc:MGI:1915762]	1.53484	5.14613	78.072	9.93513e-19	3.47187e-17
ENSMUSG00000068696	64378	Gpr88	G-protein coupled receptor 88 [Source:MGI Symbol;Acc:MGI:1927653]	1.44495	7.67279	77.9628	1.05e-18	3.66157e-17
ENSMUSG00000060735	239336	Rxfp3	relaxin family peptide receptor 3 [Source:MGI Symbol;Acc:MGI:2441827]	2.53848	2.19719	77.9488	1.05749e-18	3.67996e-17
ENSMUSG00000025993	53945	Slc40a1	solute carrier family 40 (iron-regulated transporter), member 1 [Source:MGI Symbol;Acc:MGI:1315204]	-2.03322	3.52683	77.8169	1.13046e-18	3.92537e-17
ENSMUSG00000036097	226151	Fam178a	family with sequence similarity 178, member A [Source:MGI Symbol;Acc:MGI:1924968]	-1.58121	5.04432	77.813	1.13273e-18	3.92537e-17
ENSMUSG00000024474	24010	Ik	IK cytokine [Source:MGI Symbol;Acc:MGI:1345142]	1.24287	7.33739	77.7624	1.16212e-18	4.01887e-17
ENSMUSG00000038495	229603	Otud7b	OTU domain containing 7B [Source:MGI Symbol;Acc:MGI:2654703]	-1.62685	5.97815	77.5476	1.29565e-18	4.47134e-17
ENSMUSG00000043388	243339	Tmem130	transmembrane protein 130 [Source:MGI Symbol;Acc:MGI:3607706]	1.44209	7.63153	77.4903	1.33373e-18	4.59324e-17
ENSMUSG00000030098	243547	Grip2	glutamate receptor interacting protein 2 [Source:MGI Symbol;Acc:MGI:2681173]	1.23018	3.85936	77.4045	1.39297e-18	4.78733e-17
ENSMUSG00000071014	230075	Ndufb6	NADH dehydrogenase (ubiquinone) 1 beta subcomplex, 6 [Source:MGI Symbol;Acc:MGI:2684983]	1.64509	5.79796	77.3514	1.43094e-18	4.9077e-17
ENSMUSG00000025579	14387	Gaa	glucosidase, alpha, acid [Source:MGI Symbol;Acc:MGI:95609]	1.53131	7.99207	77.3215	1.45275e-18	4.97224e-17
ENSMUSG00000024099	72900	Ndufv2	NADH dehydrogenase (ubiquinone) flavoprotein 2 [Source:MGI Symbol;Acc:MGI:1920150]	1.50961	8.3499	77.2829	1.48141e-18	5.0599e-17
ENSMUSG00000055373	14348	Fut9	fucosyltransferase 9 [Source:MGI Symbol;Acc:MGI:1330859]	-1.7227	7.71038	77.1531	1.58205e-18	5.39258e-17
ENSMUSG00000070880	14415	Gad1	glutamate decarboxylase 1 [Source:MGI Symbol;Acc:MGI:95632]	2.5431	9.87781	76.9729	1.73323e-18	5.89582e-17
ENSMUSG00000031543	11733	Ank1	ankyrin 1, erythroid [Source:MGI Symbol;Acc:MGI:88024]	1.61912	2.88018	76.9059	1.79303e-18	6.08679e-17
ENSMUSG00000058571	23888	Gpc6	glypican 6 [Source:MGI Symbol;Acc:MGI:1346322]	-2.16127	4.52952	76.8901	1.80745e-18	6.12324e-17
ENSMUSG00000057388	67681	Mrpl18	mitochondrial ribosomal protein L18 [Source:MGI Symbol;Acc:MGI:1914931]	1.27584	6.6883	76.8747	1.8216e-18	6.15864e-17
ENSMUSG00000013822	66126	Elof1	ELF1 homolog, elongation factor 1 [Source:MGI Symbol;Acc:MGI:1913376]	1.38208	6.71732	76.8376	1.8561e-18	6.26256e-17
ENSMUSG00000004151	14009	Etv1	ets variant 1 [Source:MGI Symbol;Acc:MGI:99254]	-1.33486	5.539	76.7892	1.90211e-18	6.40478e-17
ENSMUSG00000025208	94067	Mrpl43	mitochondrial ribosomal protein L43 [Source:MGI Symbol;Acc:MGI:2137229]	1.32158	5.59322	76.7616	1.92893e-18	6.482e-17
ENSMUSG00000032312	12988	Csk	c-src tyrosine kinase [Source:MGI Symbol;Acc:MGI:88537]	1.76733	3.21281	76.7544	1.93596e-18	6.49249e-17
ENSMUSG00000026103	14660	Gls	glutaminase [Source:MGI Symbol;Acc:MGI:95752]	-1.19364	7.78185	76.7319	1.95818e-18	6.5538e-17
ENSMUSG00000021607	94066	Mrpl36	mitochondrial ribosomal protein L36 [Source:MGI Symbol;Acc:MGI:2137228]	1.21145	6.13905	76.6645	2.02609e-18	6.75429e-17
ENSMUSG00000074345	244882	Tnfaip8l3	tumor necrosis factor, alpha-induced protein 8-like 3 [Source:MGI Symbol;Acc:MGI:2685363]	2.10169	2.86807	76.6644	2.02621e-18	6.75429e-17
ENSMUSG00000059361	228777	Nrsn2	neurensin 2 [Source:MGI Symbol;Acc:MGI:2684969]	2.24038	7.75692	76.6482	2.04288e-18	6.79627e-17
ENSMUSG00000057229	66349	Atp5sl	ATP5S-like [Source:MGI Symbol;Acc:MGI:1913599]	1.36988	5.59566	76.6304	2.06144e-18	6.84432e-17
ENSMUSG00000023939	68463	Mrpl14	mitochondrial ribosomal protein L14 [Source:MGI Symbol;Acc:MGI:1333864]	1.41936	5.21604	76.5186	2.18146e-18	7.22837e-17
ENSMUSG00000025204	67264	Ndufb8	NADH dehydrogenase (ubiquinone) 1 beta subcomplex 8 [Source:MGI Symbol;Acc:MGI:1914514]	1.6409	7.97794	76.5146	2.18596e-18	7.22889e-17
ENSMUSG00000026896	71586	Ifih1	interferon induced with helicase C domain 1 [Source:MGI Symbol;Acc:MGI:1918836]	-2.3504	1.56298	76.4948	2.20795e-18	7.2871e-17
ENSMUSG00000002731	23992	Prkra	protein kinase, interferon inducible double stranded RNA dependent activator [Source:MGI Symbol;Acc:MGI:1344375]	1.72577	4.37096	76.4516	2.25675e-18	7.43343e-17
ENSMUSG00000018217	18858	Pmp22	peripheral myelin protein 22 [Source:MGI Symbol;Acc:MGI:97631]	-1.65788	4.85807	76.4222	2.29057e-18	7.52991e-17
ENSMUSG00000039601	53901	Rcan2	regulator of calcineurin 2 [Source:MGI Symbol;Acc:MGI:1858219]	1.53928	7.27103	76.3554	2.36945e-18	7.77385e-17
ENSMUSG00000022856	66664	Tmem41a	transmembrane protein 41a [Source:MGI Symbol;Acc:MGI:1913914]	1.56539	4.83691	76.2648	2.48066e-18	8.12268e-17
ENSMUSG00000033701	72482	Acbd6	acyl-Coenzyme A binding domain containing 6 [Source:MGI Symbol;Acc:MGI:1919732]	1.45968	4.93754	76.1966	2.56782e-18	8.39159e-17
ENSMUSG00000071567	NA	A830039N20Rik	RIKEN cDNA A830039N20 gene [Source:MGI Symbol;Acc:MGI:2445176]	-1.55443	6.77336	75.9124	2.96529e-18	9.67148e-17
ENSMUSG00000019889	19272	Ptprk	protein tyrosine phosphatase, receptor type, K [Source:MGI Symbol;Acc:MGI:103310]	-1.87032	5.37722	75.8517	3.0579e-18	9.95402e-17
ENSMUSG00000053297	NA	AI854703	expressed sequence AI854703 [Source:MGI Symbol;Acc:MGI:2141510]	1.2166	5.13075	75.8337	3.08585e-18	1.00254e-16
ENSMUSG00000049076	78618	Acap2	ArfGAP with coiled-coil, ankyrin repeat and PH domains 2 [Source:MGI Symbol;Acc:MGI:1925868]	-1.39393	5.28541	75.7156	3.27608e-18	1.06227e-16
ENSMUSG00000026383	226352	Epb41l5	erythrocyte membrane protein band 4.1 like 5 [Source:MGI Symbol;Acc:MGI:103006]	-1.64438	4.37117	75.631	3.41948e-18	1.10661e-16
ENSMUSG00000033740	240690	St18	suppression of tumorigenicity 18 [Source:MGI Symbol;Acc:MGI:2446700]	-1.89737	2.97217	75.5309	3.59731e-18	1.1619e-16
ENSMUSG00000042380	80284	Smim12	small integral membrane protein 12 [Source:MGI Symbol;Acc:MGI:1933141]	1.3618	4.95025	75.502	3.65039e-18	1.17676e-16
ENSMUSG00000024902	66419	Mrpl11	mitochondrial ribosomal protein L11 [Source:MGI Symbol;Acc:MGI:2137215]	1.17169	5.95611	75.4069	3.83047e-18	1.23242e-16
ENSMUSG00000022748	66497	Cmss1	cms small ribosomal subunit 1 [Source:MGI Symbol;Acc:MGI:1913747]	1.53434	2.97024	75.3576	3.92725e-18	1.26112e-16
ENSMUSG00000038319	16511	Kcnh2	potassium voltage-gated channel, subfamily H (eag-related), member 2 [Source:MGI Symbol;Acc:MGI:1341722]	2.19375	1.79629	75.2491	4.14921e-18	1.32983e-16
ENSMUSG00000014633	66531	Cmc2	COX assembly mitochondrial protein 2 [Source:MGI Symbol;Acc:MGI:1913781]	1.32018	4.38595	75.2219	4.20684e-18	1.3457e-16
ENSMUSG00000046404	226418	Yod1	YOD1 deubiquitinase [Source:MGI Symbol;Acc:MGI:2442596]	-2.11424	6.9833	75.1472	4.36892e-18	1.39487e-16
ENSMUSG00000034009	381489	Rxfp1	relaxin/insulin-like family peptide receptor 1 [Source:MGI Symbol;Acc:MGI:2682211]	-1.91985	4.5133	75.0623	4.56087e-18	1.45336e-16
ENSMUSG00000037625	18417	Cldn11	claudin 11 [Source:MGI Symbol;Acc:MGI:106925]	-2.41308	8.7303	74.9469	4.83556e-18	1.53654e-16
ENSMUSG00000021807	68045	2700060E02Rik	RIKEN cDNA 2700060E02 gene [Source:MGI Symbol;Acc:MGI:1915295]	1.26053	5.37591	74.9449	4.84036e-18	1.53654e-16
ENSMUSG00000035236	320271	Scai	suppressor of cancer cell invasion [Source:MGI Symbol;Acc:MGI:2443716]	-1.69125	6.05587	74.9129	4.91955e-18	1.5587e-16
ENSMUSG00000034744	56174	Nagk	N-acetylglucosamine kinase [Source:MGI Symbol;Acc:MGI:1860418]	1.12393	5.41675	74.7928	5.22813e-18	1.65332e-16
ENSMUSG00000020251	74782	Glt8d2	glycosyltransferase 8 domain containing 2 [Source:MGI Symbol;Acc:MGI:1922032]	-2.38198	3.51667	74.772	5.28327e-18	1.66759e-16
ENSMUSG00000017188	52469	Coa3	cytochrome C oxidase assembly factor 3 [Source:MGI Symbol;Acc:MGI:1098757]	1.31923	8.09056	74.6139	5.72401e-18	1.80328e-16
ENSMUSG00000048706	52829	Lurap1l	leucine rich adaptor protein 1-like [Source:MGI Symbol;Acc:MGI:106510]	1.68612	4.48123	74.6074	5.74273e-18	1.80576e-16
ENSMUSG00000046523	67516	Kctd4	potassium channel tetramerisation domain containing 4 [Source:MGI Symbol;Acc:MGI:1914766]	-1.72297	4.51388	74.5657	5.86521e-18	1.84079e-16
ENSMUSG00000033579	338521	Fa2h	fatty acid 2-hydroxylase [Source:MGI Symbol;Acc:MGI:2443327]	-2.91812	5.58994	74.536	5.95435e-18	1.86525e-16
ENSMUSG00000029798	67138	Herc6	hect domain and RLD 6 [Source:MGI Symbol;Acc:MGI:1914388]	-2.41631	2.64991	74.5135	6.02251e-18	1.88305e-16
ENSMUSG00000042258	16392	Isl1	ISL1 transcription factor, LIM/homeodomain [Source:MGI Symbol;Acc:MGI:101791]	2.77353	2.67665	74.4184	6.31968e-18	1.97226e-16
ENSMUSG00000027131	68032	Emc4	ER membrane protein complex subunit 4 [Source:MGI Symbol;Acc:MGI:1915282]	1.32795	7.25196	74.3993	6.38115e-18	1.98772e-16
ENSMUSG00000020949	30795	Fkbp3	FK506 binding protein 3 [Source:MGI Symbol;Acc:MGI:1353460]	1.20077	7.54725	74.2968	6.7211e-18	2.0897e-16
ENSMUSG00000062627	320713	Mysm1	myb-like, SWIRM and MPN domains 1 [Source:MGI Symbol;Acc:MGI:2444584]	-1.78433	5.10448	74.2904	6.74318e-18	2.09265e-16
ENSMUSG00000026014	77300	Raph1	Ras association (RalGDS/AF-6) and pleckstrin homology domains 1 [Source:MGI Symbol;Acc:MGI:1924550]	-1.45758	5.83546	74.1587	7.20824e-18	2.23281e-16
ENSMUSG00000040532	68758	Abhd11	abhydrolase domain containing 11 [Source:MGI Symbol;Acc:MGI:1916008]	1.03414	4.88935	74.1512	7.23585e-18	2.2372e-16
ENSMUSG00000023886	64074	Smoc2	SPARC related modular calcium binding 2 [Source:MGI Symbol;Acc:MGI:1929881]	-2.14565	3.54589	74.0676	7.54873e-18	2.3296e-16
ENSMUSG00000001053	212706	N4bp3	NEDD4 binding protein 3 [Source:MGI Symbol;Acc:MGI:2442218]	2.28675	1.48983	73.9186	8.14076e-18	2.50765e-16
ENSMUSG00000020097	20397	Sgpl1	sphingosine phosphate lyase 1 [Source:MGI Symbol;Acc:MGI:1261415]	-1.41417	4.93173	73.7414	8.90516e-18	2.73805e-16
ENSMUSG00000086316	NA	2210013O21Rik	RIKEN cDNA 2210013O21 gene [Source:MGI Symbol;Acc:MGI:1917373]	1.71011	6.36175	73.7211	8.99727e-18	2.76127e-16
ENSMUSG00000049690	210356	Nckap5	NCK-associated protein 5 [Source:MGI Symbol;Acc:MGI:2686394]	-2.69197	3.08757	73.6058	9.53838e-18	2.92194e-16
ENSMUSG00000021496	72562	Pcbd2	pterin 4 alpha carbinolamine dehydratase/dimerization cofactor of hepatocyte nuclear factor 1 alpha (TCF1) 2 [Source:MGI Symbol;Acc:MGI:1919812]	2.1706	2.49903	73.5759	9.68407e-18	2.96112e-16
ENSMUSG00000006782	12799	Cnp	2',3'-cyclic nucleotide 3' phosphodiesterase [Source:MGI Symbol;Acc:MGI:88437]	-2.20082	8.83532	73.5458	9.83301e-18	3.00114e-16
ENSMUSG00000034342	12402	Cbl	Casitas B-lineage lymphoma [Source:MGI Symbol;Acc:MGI:88279]	-1.42742	4.23847	73.5099	1.00134e-17	3.05061e-16
ENSMUSG00000006403	240913	Adamts4	a disintegrin-like and metallopeptidase (reprolysin type) with thrombospondin type 1 motif, 4 [Source:MGI Symbol;Acc:MGI:1339949]	-2.37425	5.5384	73.493	1.00994e-17	3.07117e-16
ENSMUSG00000052336	13051	Cx3cr1	chemokine (C-X3-C motif) receptor 1 [Source:MGI Symbol;Acc:MGI:1333815]	-2.44985	6.3105	73.4356	1.03973e-17	3.1469e-16
ENSMUSG00000021079	30056	Timm9	translocase of inner mitochondrial membrane 9 [Source:MGI Symbol;Acc:MGI:1353436]	1.20096	5.34249	73.4343	1.04042e-17	3.1469e-16
ENSMUSG00000021606	407785	Ndufs6	NADH dehydrogenase (ubiquinone) Fe-S protein 6 [Source:MGI Symbol;Acc:MGI:107932]	1.75933	7.4257	73.4341	1.04052e-17	3.1469e-16
ENSMUSG00000035413	103743	Tmem98	transmembrane protein 98 [Source:MGI Symbol;Acc:MGI:1923457]	-2.3421	4.03984	73.3952	1.06124e-17	3.20376e-16
ENSMUSG00000020178	11540	Adora2a	adenosine A2a receptor [Source:MGI Symbol;Acc:MGI:99402]	2.88357	3.66437	73.3579	1.08149e-17	3.25897e-16
ENSMUSG00000078348	66125	Sf3b5	splicing factor 3b, subunit 5 [Source:MGI Symbol;Acc:MGI:1913375]	1.19838	5.39499	73.3395	1.09161e-17	3.2835e-16
ENSMUSG00000022237	67434	Ankrd33b	ankyrin repeat domain 33B [Source:MGI Symbol;Acc:MGI:1917904]	-1.27619	4.76324	73.3019	1.11259e-17	3.33639e-16
ENSMUSG00000080904	NA	Gm11966	predicted gene 11966 [Source:MGI Symbol;Acc:MGI:3649988]	2.29034	1.29959	73.3008	1.1132e-17	3.33639e-16
ENSMUSG00000037465	21847	Klf10	Kruppel-like factor 10 [Source:MGI Symbol;Acc:MGI:1101353]	-1.91485	5.39263	73.2653	1.13341e-17	3.39086e-16
ENSMUSG00000025701	11689	Alox5	arachidonate 5-lipoxygenase [Source:MGI Symbol;Acc:MGI:87999]	-2.93699	1.35918	73.2522	1.14098e-17	3.40738e-16
ENSMUSG00000055320	21676	Tead1	TEA domain family member 1 [Source:MGI Symbol;Acc:MGI:101876]	-2.59161	3.33776	73.0834	1.24286e-17	3.70497e-16
ENSMUSG00000050299	NA	Gm9843	predicted gene 9843 [Source:MGI Symbol;Acc:MGI:3708621]	2.00356	2.86898	73.0748	1.24829e-17	3.71451e-16
ENSMUSG00000055723	66922	Rras2	related RAS viral (r-ras) oncogene 2 [Source:MGI Symbol;Acc:MGI:1914172]	-1.7404	4.34933	73.0693	1.25177e-17	3.71821e-16
ENSMUSG00000036850	107733	Mrpl41	mitochondrial ribosomal protein L41 [Source:MGI Symbol;Acc:MGI:1333816]	1.35297	6.45201	73.0377	1.27199e-17	3.77153e-16
ENSMUSG00000022257	114128	Laptm4b	lysosomal-associated protein transmembrane 4B [Source:MGI Symbol;Acc:MGI:1890494]	1.44462	7.22199	73.0263	1.27932e-17	3.78652e-16
ENSMUSG00000031380	14205	Vegfd	vascular endothelial growth factor D [Source:MGI Symbol;Acc:MGI:108037]	-2.9778	1.72415	73.0069	1.29197e-17	3.81716e-16
ENSMUSG00000036353	70839	P2ry12	purinergic receptor P2Y, G-protein coupled 12 [Source:MGI Symbol;Acc:MGI:1918089]	-1.96914	6.17939	72.8828	1.37583e-17	4.05772e-16
ENSMUSG00000030655	233789	Smg1	SMG1 homolog, phosphatidylinositol 3-kinase-related kinase (C. elegans) [Source:MGI Symbol;Acc:MGI:1919742]	-1.81963	5.26455	72.7556	1.46741e-17	4.32016e-16
ENSMUSG00000090258	211151	Churc1	churchill domain containing 1 [Source:MGI Symbol;Acc:MGI:1923684]	1.51427	4.95221	72.7296	1.48686e-17	4.36968e-16
ENSMUSG00000029145	13667	Eif2b4	eukaryotic translation initiation factor 2B, subunit 4 delta [Source:MGI Symbol;Acc:MGI:95300]	1.18535	4.76957	72.7249	1.49038e-17	4.37232e-16
ENSMUSG00000036372	69038	Tmem258	transmembrane protein 258 [Source:MGI Symbol;Acc:MGI:1916288]	1.4257	7.10869	72.7192	1.49475e-17	4.3734e-16
ENSMUSG00000028470	68917	Hint2	histidine triad nucleotide binding protein 2 [Source:MGI Symbol;Acc:MGI:1916167]	1.77493	3.9138	72.7162	1.497e-17	4.3734e-16
ENSMUSG00000029212	14400	Gabrb1	gamma-aminobutyric acid (GABA) A receptor, subunit beta 1 [Source:MGI Symbol;Acc:MGI:95619]	-1.48444	5.28455	72.714	1.49864e-17	4.3734e-16
ENSMUSG00000002477	20641	Snrpd1	small nuclear ribonucleoprotein D1 [Source:MGI Symbol;Acc:MGI:98344]	1.31059	5.17679	72.6325	1.56184e-17	4.54984e-16
ENSMUSG00000024309	14976	Pfdn6	prefoldin subunit 6 [Source:MGI Symbol;Acc:MGI:95908]	1.39733	4.94341	72.5885	1.59709e-17	4.64441e-16
ENSMUSG00000038766	213054	Gabpb2	GA repeat binding protein, beta 2 [Source:MGI Symbol;Acc:MGI:95612]	-1.97522	2.83685	72.4908	1.67815e-17	4.87161e-16
ENSMUSG00000043822	66548	Adamtsl5	ADAMTS-like 5 [Source:MGI Symbol;Acc:MGI:1913798]	2.4118	1.79605	72.4551	1.70876e-17	4.95182e-16
ENSMUSG00000047721	NA	Bola2	bolA-like 2 (E. coli) [Source:MGI Symbol;Acc:MGI:1913412]	1.64481	6.14007	72.442	1.72016e-17	4.97621e-16
ENSMUSG00000005625	19185	Psmd4	proteasome (prosome, macropain) 26S subunit, non-ATPase, 4 [Source:MGI Symbol;Acc:MGI:1201670]	1.13687	6.42243	72.383	1.77237e-17	5.11833e-16
ENSMUSG00000032112	60409	Trappc4	trafficking protein particle complex 4 [Source:MGI Symbol;Acc:MGI:1926211]	1.11886	6.89686	72.3654	1.78821e-17	5.15512e-16
ENSMUSG00000040269	66230	Mrps28	mitochondrial ribosomal protein S28 [Source:MGI Symbol;Acc:MGI:1913480]	1.47236	4.3924	72.257	1.88919e-17	5.4368e-16
ENSMUSG00000061601	26875	Pclo	piccolo (presynaptic cytomatrix protein) [Source:MGI Symbol;Acc:MGI:1349390]	-1.56867	7.87089	72.2379	1.90755e-17	5.48017e-16
ENSMUSG00000036814	102680	Slc6a20a	solute carrier family 6 (neurotransmitter transporter), member 20A [Source:MGI Symbol;Acc:MGI:2143217]	-2.83439	2.73285	72.1886	1.95578e-17	5.60903e-16
ENSMUSG00000073910	214944	Mob3b	MOB kinase activator 3B [Source:MGI Symbol;Acc:MGI:2664539]	-2.00837	4.64047	72.1673	1.97708e-17	5.66037e-16
ENSMUSG00000026235	13838	Epha4	Eph receptor A4 [Source:MGI Symbol;Acc:MGI:98277]	-1.76944	8.74651	72.1056	2.03979e-17	5.82987e-16
ENSMUSG00000023224	12258	Serping1	serine (or cysteine) peptidase inhibitor, clade G, member 1 [Source:MGI Symbol;Acc:MGI:894696]	-2.78862	2.76415	72.0583	2.08937e-17	5.96133e-16
ENSMUSG00000022836	107589	Mylk	myosin, light polypeptide kinase [Source:MGI Symbol;Acc:MGI:894806]	-1.69028	3.34812	72.0374	2.11161e-17	6.01446e-16
ENSMUSG00000026349	NA	Ccnt2	cyclin T2 [Source:MGI Symbol;Acc:MGI:1920199]	-2.28587	5.4127	71.9301	2.22957e-17	6.33959e-16
ENSMUSG00000067028	241175	Cntnap5b	contactin associated protein-like 5B [Source:MGI Symbol;Acc:MGI:3664583]	-1.51092	4.29724	71.8495	2.32254e-17	6.59269e-16
ENSMUSG00000079110	12335	Capn3	calpain 3 [Source:MGI Symbol;Acc:MGI:107437]	-2.07069	2.98039	71.802	2.37907e-17	6.74164e-16
ENSMUSG00000053226	23863	Dand5	DAN domain family member 5, BMP antagonist [Source:MGI Symbol;Acc:MGI:1344365]	1.36353	3.65093	71.7642	2.42507e-17	6.86031e-16
ENSMUSG00000024925	68209	Rnaseh2c	ribonuclease H2, subunit C [Source:MGI Symbol;Acc:MGI:1915459]	1.88662	2.6504	71.7223	2.47723e-17	6.99597e-16
ENSMUSG00000057130	27366	Txnl4a	thioredoxin-like 4A [Source:MGI Symbol;Acc:MGI:1351613]	1.23831	5.16065	71.7148	2.48663e-17	7.0106e-16
ENSMUSG00000049119	242297	Fam110b	family with sequence similarity 110, member B [Source:MGI Symbol;Acc:MGI:1916593]	1.40697	5.3932	71.6793	2.53172e-17	7.12565e-16
ENSMUSG00000028532	320508	Cachd1	cache domain containing 1 [Source:MGI Symbol;Acc:MGI:2444177]	-1.34887	4.33902	71.6297	2.59624e-17	7.29491e-16
ENSMUSG00000034487	68304	Kdelc2	KDEL (Lys-Asp-Glu-Leu) containing 2 [Source:MGI Symbol;Acc:MGI:1923765]	-1.81675	2.81596	71.571	2.67465e-17	7.50255e-16
ENSMUSG00000032410	24127	Xrn1	5'-3' exoribonuclease 1 [Source:MGI Symbol;Acc:MGI:891964]	-1.43386	5.06174	71.4701	2.81493e-17	7.88274e-16
ENSMUSG00000040997	105501	Abhd4	abhydrolase domain containing 4 [Source:MGI Symbol;Acc:MGI:1915938]	-2.10854	6.98852	71.3409	3.00536e-17	8.40187e-16
ENSMUSG00000002104	19400	Rapsn	receptor-associated protein of the synapse [Source:MGI Symbol;Acc:MGI:99422]	2.43734	1.48733	71.3119	3.04987e-17	8.50167e-16
ENSMUSG00000087694	NA	A530058N18Rik	RIKEN cDNA A530058N18 gene [Source:MGI Symbol;Acc:MGI:2444858]	1.97974	3.31841	71.311	3.05128e-17	8.50167e-16
ENSMUSG00000022947	109857	Cbr3	carbonyl reductase 3 [Source:MGI Symbol;Acc:MGI:1309992]	2.41854	2.79143	71.2871	3.08849e-17	8.59096e-16
ENSMUSG00000007721	234388	Ccdc124	coiled-coil domain containing 124 [Source:MGI Symbol;Acc:MGI:1916403]	1.26502	5.50555	71.2379	3.16643e-17	8.79306e-16
ENSMUSG00000027327	67326	1700037H04Rik	RIKEN cDNA 1700037H04 gene [Source:MGI Symbol;Acc:MGI:1914576]	1.65877	6.5017	71.1879	3.24766e-17	9.0036e-16
ENSMUSG00000037474	76843	Dtl	denticleless E3 ubiquitin protein ligase [Source:MGI Symbol;Acc:MGI:1924093]	-2.51365	3.17684	71.1615	3.2915e-17	9.10994e-16
ENSMUSG00000056515	106572	Rab31	RAB31, member RAS oncogene family [Source:MGI Symbol;Acc:MGI:1914603]	-2.09301	7.0349	71.1047	3.38763e-17	9.36043e-16
ENSMUSG00000022656	58998	Nectin3	nectin cell adhesion molecule 3 [Source:MGI Symbol;Acc:MGI:1930171]	-1.76744	5.73156	71.0498	3.48315e-17	9.60842e-16
ENSMUSG00000029101	71729	Rgs12	regulator of G-protein signaling 12 [Source:MGI Symbol;Acc:MGI:1918979]	1.34592	5.36029	71.045	3.49164e-17	9.61588e-16
ENSMUSG00000024650	18399	Slc22a6	solute carrier family 22 (organic anion transporter), member 6 [Source:MGI Symbol;Acc:MGI:892001]	-3.5665	1.66299	71.0217	3.53312e-17	9.69898e-16
ENSMUSG00000052456	56495	Asna1	arsA arsenite transporter, ATP-binding, homolog 1 (bacterial) [Source:MGI Symbol;Acc:MGI:1928379]	1.21759	5.67696	71.0215	3.53347e-17	9.69898e-16
ENSMUSG00000025135	66156	Anapc11	anaphase promoting complex subunit 11 [Source:MGI Symbol;Acc:MGI:1913406]	1.34474	7.10625	70.9896	3.5912e-17	9.8412e-16
ENSMUSG00000030465	234353	Psd3	pleckstrin and Sec7 domain containing 3 [Source:MGI Symbol;Acc:MGI:1918215]	-1.62836	8.14665	70.9822	3.6047e-17	9.84711e-16
ENSMUSG00000034832	194388	Tet3	tet methylcytosine dioxygenase 3 [Source:MGI Symbol;Acc:MGI:2446229]	-1.17709	5.49484	70.9819	3.6052e-17	9.84711e-16
ENSMUSG00000025019	212391	Lcor	ligand dependent nuclear receptor corepressor [Source:MGI Symbol;Acc:MGI:2443930]	-2.51116	3.61312	70.9078	3.74314e-17	1.02071e-15
ENSMUSG00000070493	14004	Chchd2	coiled-coil-helix-coiled-coil-helix domain containing 2 [Source:MGI Symbol;Acc:MGI:1261428]	1.85644	6.80023	70.8928	3.77176e-17	1.02683e-15
ENSMUSG00000037824	52588	Tspan14	tetraspanin 14 [Source:MGI Symbol;Acc:MGI:1196325]	-1.71134	6.1274	70.8361	3.88171e-17	1.05504e-15
ENSMUSG00000029560	231834	Snx8	sorting nexin 8 [Source:MGI Symbol;Acc:MGI:2443816]	2.10178	3.24873	70.8311	3.89158e-17	1.056e-15
ENSMUSG00000049751	66483	Rpl36al	ribosomal protein L36A-like [Source:MGI Symbol;Acc:MGI:1913733]	1.38645	5.0426	70.8219	3.90974e-17	1.05919e-15
ENSMUSG00000062054	67732	Iah1	isoamyl acetate-hydrolyzing esterase 1 homolog [Source:MGI Symbol;Acc:MGI:1914982]	1.20932	4.44581	70.8138	3.92582e-17	1.06182e-15
ENSMUSG00000020621	105014	Rdh14	retinol dehydrogenase 14 (all-trans and 9-cis) [Source:MGI Symbol;Acc:MGI:1920402]	1.23842	5.55377	70.7399	4.07559e-17	1.10054e-15
ENSMUSG00000025199	12675	Chuk	conserved helix-loop-helix ubiquitous kinase [Source:MGI Symbol;Acc:MGI:99484]	-2.07877	4.55158	70.6901	4.17986e-17	1.12687e-15
ENSMUSG00000042225	56068	Ammecr1	Alport syndrome, mental retardation, midface hypoplasia and elliptocytosis chromosomal region gene 1 [Source:MGI Symbol;Acc:MGI:1860206]	-1.92961	3.02151	70.6734	4.21543e-17	1.13462e-15
ENSMUSG00000038056	231051	Kmt2c	lysine (K)-specific methyltransferase 2C [Source:MGI Symbol;Acc:MGI:2444959]	-1.3289	6.32582	70.6219	4.32698e-17	1.16276e-15
ENSMUSG00000025381	56530	Cnpy2	canopy FGF signaling regulator 2 [Source:MGI Symbol;Acc:MGI:1928477]	1.08216	5.97164	70.5259	4.54254e-17	1.2174e-15
ENSMUSG00000021241	74316	Isca2	iron-sulfur cluster assembly 2 [Source:MGI Symbol;Acc:MGI:1921566]	1.72908	6.55212	70.5249	4.54493e-17	1.2174e-15
ENSMUSG00000074649	NA	BC029722	cDNA sequence BC029722 [Source:MGI Symbol;Acc:MGI:3584273]	1.56569	2.62001	70.464	4.68751e-17	1.25357e-15
ENSMUSG00000024844	23825	Banf1	barrier to autointegration factor 1 [Source:MGI Symbol;Acc:MGI:1346330]	1.5306	6.34434	70.3908	4.86474e-17	1.29888e-15
ENSMUSG00000042272	228071	Sestd1	SEC14 and spectrin domains 1 [Source:MGI Symbol;Acc:MGI:1916262]	-1.50588	5.48539	70.3261	5.02694e-17	1.34003e-15
ENSMUSG00000021275	104859	Tecpr2	tectonin beta-propeller repeat containing 2 [Source:MGI Symbol;Acc:MGI:2144865]	-1.3414	5.28278	70.3179	5.04779e-17	1.34344e-15
ENSMUSG00000032135	84004	Mcam	melanoma cell adhesion molecule [Source:MGI Symbol;Acc:MGI:1933966]	-2.63038	4.23288	70.2839	5.13551e-17	1.3646e-15
ENSMUSG00000027954	13636	Efna1	ephrin A1 [Source:MGI Symbol;Acc:MGI:103236]	-3.20939	2.66493	70.1932	5.37709e-17	1.42651e-15
ENSMUSG00000027996	20319	Sfrp2	secreted frizzled-related protein 2 [Source:MGI Symbol;Acc:MGI:108078]	2.55018	2.45375	70.0661	5.73515e-17	1.51908e-15
ENSMUSG00000039278	30052	Pcsk1n	proprotein convertase subtilisin/kexin type 1 inhibitor [Source:MGI Symbol;Acc:MGI:1353431]	2.17055	6.24106	70.0611	5.74965e-17	1.5205e-15
ENSMUSG00000031897	19171	Psmb10	proteasome (prosome, macropain) subunit, beta type 10 [Source:MGI Symbol;Acc:MGI:1096380]	1.20873	5.84248	70.0431	5.8022e-17	1.52987e-15
ENSMUSG00000062753	106672	AI413582	expressed sequence AI413582 [Source:MGI Symbol;Acc:MGI:2146839]	1.44359	5.93592	70.0427	5.80346e-17	1.52987e-15
ENSMUSG00000030731	20981	Syt3	synaptotagmin III [Source:MGI Symbol;Acc:MGI:99665]	1.44483	5.06363	69.9942	5.94792e-17	1.56547e-15
ENSMUSG00000032193	16835	Ldlr	low density lipoprotein receptor [Source:MGI Symbol;Acc:MGI:96765]	-1.96242	4.34976	69.99	5.96046e-17	1.56629e-15
ENSMUSG00000023967	68565	Mrps18a	mitochondrial ribosomal protein S18A [Source:MGI Symbol;Acc:MGI:1915815]	1.07151	6.40367	69.8981	6.24471e-17	1.6384e-15
ENSMUSG00000063200	70078	Nol7	nucleolar protein 7 [Source:MGI Symbol;Acc:MGI:1917328]	1.38028	5.51204	69.8638	6.35427e-17	1.66452e-15
ENSMUSG00000026730	19212	Pter	phosphotriesterase related [Source:MGI Symbol;Acc:MGI:107372]	-2.3071	6.53759	69.8525	6.39085e-17	1.67147e-15
ENSMUSG00000031133	73341	Arhgef6	Rac/Cdc42 guanine nucleotide exchange factor (GEF) 6 [Source:MGI Symbol;Acc:MGI:1920591]	1.41131	3.96788	69.8038	6.55073e-17	1.7106e-15
ENSMUSG00000059013	27387	Sh2d3c	SH2 domain containing 3C [Source:MGI Symbol;Acc:MGI:1351631]	1.6321	3.31369	69.7955	6.5782e-17	1.71507e-15
ENSMUSG00000097184	NA	4632428C04Rik	RIKEN cDNA 4632428C04 gene [Source:MGI Symbol;Acc:MGI:1921600]	2.77104	0.897575	69.7811	6.62651e-17	1.72497e-15
ENSMUSG00000036777	68743	Anln	anillin, actin binding protein [Source:MGI Symbol;Acc:MGI:1920174]	-1.95405	4.03975	69.7407	6.76362e-17	1.75791e-15
ENSMUSG00000038805	20473	Six3	sine oculis-related homeobox 3 [Source:MGI Symbol;Acc:MGI:102764]	2.61252	3.35077	69.5797	7.33873e-17	1.90239e-15
ENSMUSG00000005917	18423	Otx1	orthodenticle homeobox 1 [Source:MGI Symbol;Acc:MGI:97450]	-2.16795	1.709	69.5787	7.34242e-17	1.90239e-15
ENSMUSG00000033006	20665	Sox10	SRY (sex determining region Y)-box 10 [Source:MGI Symbol;Acc:MGI:98358]	-2.55326	3.9686	69.5709	7.3716e-17	1.90699e-15
ENSMUSG00000014418	246694	Hps5	HPS5, biogenesis of lysosomal organelles complex 2 subunit 2 [Source:MGI Symbol;Acc:MGI:2180307]	-2.12581	3.36074	69.4794	7.72163e-17	1.99443e-15
ENSMUSG00000021876	58809	Rnase4	ribonuclease, RNase A family 4 [Source:MGI Symbol;Acc:MGI:1926217]	-1.86787	4.8163	69.4371	7.88892e-17	2.03449e-15
ENSMUSG00000028648	595136	Ndufs5	NADH dehydrogenase (ubiquinone) Fe-S protein 5 [Source:MGI Symbol;Acc:MGI:1890889]	1.78021	5.05379	69.4051	8.01813e-17	2.06461e-15
ENSMUSG00000029428	13852	Stx2	syntaxin 2 [Source:MGI Symbol;Acc:MGI:108059]	-1.98675	3.30148	69.3948	8.06028e-17	2.07225e-15
ENSMUSG00000069094	18583	Pde7a	phosphodiesterase 7A [Source:MGI Symbol;Acc:MGI:1202402]	-1.30659	4.59155	69.3588	8.20853e-17	2.10711e-15
ENSMUSG00000021361	66154	Tmem14c	transmembrane protein 14C [Source:MGI Symbol;Acc:MGI:1913404]	0.986874	6.55451	69.2149	8.83006e-17	2.26316e-15
ENSMUSG00000061816	17901	Myl1	myosin, light polypeptide 1 [Source:MGI Symbol;Acc:MGI:97269]	3.15955	0.0499241	69.1939	8.92453e-17	2.28386e-15
ENSMUSG00000038034	140559	Igsf8	immunoglobulin superfamily, member 8 [Source:MGI Symbol;Acc:MGI:2154090]	1.22339	7.39797	69.1843	8.96794e-17	2.29144e-15
ENSMUSG00000022111	50933	Uchl3	ubiquitin carboxyl-terminal esterase L3 (ubiquitin thiolesterase) [Source:MGI Symbol;Acc:MGI:1355274]	1.21247	4.81399	69.1553	9.10054e-17	2.32176e-15
ENSMUSG00000015889	16993	Lta4h	leukotriene A4 hydrolase [Source:MGI Symbol;Acc:MGI:96836]	1.03046	5.49566	69.0635	9.5346e-17	2.42877e-15
ENSMUSG00000020000	59012	Moxd1	monooxygenase, DBH-like 1 [Source:MGI Symbol;Acc:MGI:1921582]	1.96088	3.79399	69.0067	9.8128e-17	2.49581e-15
ENSMUSG00000058503	68152	Fam133b	family with sequence similarity 133, member B [Source:MGI Symbol;Acc:MGI:1915402]	1.15164	5.29335	68.984	9.92644e-17	2.52086e-15
ENSMUSG00000027199	67092	Gatm	glycine amidinotransferase (L-arginine:glycine amidinotransferase) [Source:MGI Symbol;Acc:MGI:1914342]	-2.31808	6.50279	68.9378	1.01617e-16	2.57667e-15
ENSMUSG00000050002	75731	Idnk	idnK gluconokinase homolog (E. coli) [Source:MGI Symbol;Acc:MGI:1922981]	1.54136	5.30032	68.918	1.02646e-16	2.5988e-15
ENSMUSG00000024256	11516	Adcyap1	adenylate cyclase activating polypeptide 1 [Source:MGI Symbol;Acc:MGI:105094]	-2.20304	4.48211	68.9131	1.02902e-16	2.60132e-15
ENSMUSG00000049112	18430	Oxtr	oxytocin receptor [Source:MGI Symbol;Acc:MGI:109147]	1.52174	3.74518	68.9053	1.03307e-16	2.60759e-15
ENSMUSG00000032575	74840	Manf	mesencephalic astrocyte-derived neurotrophic factor [Source:MGI Symbol;Acc:MGI:1922090]	1.05857	5.92512	68.8805	1.04613e-16	2.63656e-15
ENSMUSG00000067847	67067	Romo1	reactive oxygen species modulator 1 [Source:MGI Symbol;Acc:MGI:1914317]	1.72063	6.09978	68.7466	1.11962e-16	2.81752e-15
ENSMUSG00000087497	NA	2810001G20Rik	RIKEN cDNA 2810001G20 gene [Source:MGI Symbol;Acc:MGI:1913706]	1.36401	3.39793	68.6802	1.15796e-16	2.90959e-15
ENSMUSG00000026923	18128	Notch1	notch 1 [Source:MGI Symbol;Acc:MGI:97363]	-2.79436	2.73161	68.6772	1.15975e-16	2.90969e-15
ENSMUSG00000060923	75572	Acyp2	acylphosphatase 2, muscle type [Source:MGI Symbol;Acc:MGI:1922822]	1.47603	5.6558	68.6477	1.1772e-16	2.94902e-15
ENSMUSG00000063564	237759	Col23a1	collagen, type XXIII, alpha 1 [Source:MGI Symbol;Acc:MGI:2653243]	-1.90091	3.99115	68.6259	1.19032e-16	2.9774e-15
ENSMUSG00000063787	66121	Chchd1	coiled-coil-helix-coiled-coil-helix domain containing 1 [Source:MGI Symbol;Acc:MGI:1913371]	1.50115	6.21322	68.5608	1.23024e-16	3.07265e-15
ENSMUSG00000035093	70354	Secisbp2l	SECIS binding protein 2-like [Source:MGI Symbol;Acc:MGI:1917604]	-1.27291	7.14318	68.5572	1.23248e-16	3.07362e-15
ENSMUSG00000029192	100855	Tbc1d14	TBC1 domain family, member 14 [Source:MGI Symbol;Acc:MGI:1098708]	-1.03911	6.00553	68.5543	1.23434e-16	3.07365e-15
ENSMUSG00000006218	277743	Fam131c	family with sequence similarity 131, member C [Source:MGI Symbol;Acc:MGI:2685539]	3.06656	0.273004	68.549	1.23762e-16	3.07723e-15
ENSMUSG00000024414	94064	Mrpl27	mitochondrial ribosomal protein L27 [Source:MGI Symbol;Acc:MGI:2137224]	1.32626	5.91163	68.4756	1.28457e-16	3.18918e-15
ENSMUSG00000020128	245944	Vps54	VPS54 GARP complex subunit [Source:MGI Symbol;Acc:MGI:2178798]	-1.61443	4.43617	68.4578	1.2962e-16	3.21326e-15
ENSMUSG00000020447	237636	Npc1l1	NPC1-like 1 [Source:MGI Symbol;Acc:MGI:2685089]	-2.7564	1.9175	68.4146	1.32494e-16	3.27962e-15
ENSMUSG00000050552	66096	Lamtor4	late endosomal/lysosomal adaptor, MAPK and MTOR activator 4 [Source:MGI Symbol;Acc:MGI:1913346]	1.5354	5.51344	68.3183	1.39125e-16	3.43865e-15
ENSMUSG00000021215	56349	Net1	neuroepithelial cell transforming gene 1 [Source:MGI Symbol;Acc:MGI:1927138]	-1.63075	3.39914	68.2838	1.41577e-16	3.49331e-15
ENSMUSG00000041420	17537	Meis3	Meis homeobox 3 [Source:MGI Symbol;Acc:MGI:108519]	1.31892	4.37469	68.2813	1.41757e-16	3.49331e-15
ENSMUSG00000020651	23985	Slc26a4	solute carrier family 26, member 4 [Source:MGI Symbol;Acc:MGI:1346029]	-2.12425	1.89458	68.1899	1.48486e-16	3.65373e-15
ENSMUSG00000029073	79554	Cptp	ceramide-1-phosphate transfer protein [Source:MGI Symbol;Acc:MGI:1933107]	1.33413	5.57421	68.1852	1.4884e-16	3.65703e-15
ENSMUSG00000054034	331532	Tceal5	transcription elongation factor A (SII)-like 5 [Source:MGI Symbol;Acc:MGI:3036236]	1.59943	5.46182	68.1081	1.54772e-16	3.79716e-15
ENSMUSG00000015247	66536	Nipsnap3b	nipsnap homolog 3B (C. elegans) [Source:MGI Symbol;Acc:MGI:1913786]	1.35147	4.55187	68.0372	1.60436e-16	3.93034e-15
ENSMUSG00000079593	NA	Gm14597	predicted gene 14597 [Source:MGI Symbol;Acc:MGI:3711766]	1.41173	3.94764	67.8552	1.75953e-16	4.30411e-15
ENSMUSG00000047787	396184	Flrt1	fibronectin leucine rich transmembrane protein 1 [Source:MGI Symbol;Acc:MGI:3026647]	-1.26505	6.79553	67.8283	1.78371e-16	4.35687e-15
ENSMUSG00000067787	53619	Blcap	bladder cancer associated protein [Source:MGI Symbol;Acc:MGI:1858907]	1.33011	6.46145	67.7502	1.85581e-16	4.52633e-15
ENSMUSG00000030612	67308	Mrpl46	mitochondrial ribosomal protein L46 [Source:MGI Symbol;Acc:MGI:1914558]	1.12506	5.80279	67.7149	1.88928e-16	4.60122e-15
ENSMUSG00000009291	108705	Pttg1ip	pituitary tumor-transforming 1 interacting protein [Source:MGI Symbol;Acc:MGI:2652132]	-1.69531	5.53963	67.6923	1.91104e-16	4.6474e-15
ENSMUSG00000006301	69660	Tmbim1	transmembrane BAX inhibitor motif containing 1 [Source:MGI Symbol;Acc:MGI:1916910]	-2.56895	5.01996	67.6774	1.92556e-16	4.67305e-15
ENSMUSG00000009585	80287	Apobec3	apolipoprotein B mRNA editing enzyme, catalytic polypeptide 3 [Source:MGI Symbol;Acc:MGI:1933111]	-2.67458	1.76292	67.6757	1.92721e-16	4.67305e-15
ENSMUSG00000033278	19274	Ptprm	protein tyrosine phosphatase, receptor type, M [Source:MGI Symbol;Acc:MGI:102694]	1.34087	5.63646	67.6683	1.93446e-16	4.6838e-15
ENSMUSG00000016427	54405	Ndufa1	NADH dehydrogenase (ubiquinone) 1 alpha subcomplex, 1 [Source:MGI Symbol;Acc:MGI:1929511]	2.00227	9.02527	67.604	1.99859e-16	4.83206e-15
ENSMUSG00000030137	53857	Tuba8	tubulin, alpha 8 [Source:MGI Symbol;Acc:MGI:1858225]	1.66749	3.94665	67.5919	2.01089e-16	4.85473e-15
ENSMUSG00000046997	211949	Spsb4	splA/ryanodine receptor domain and SOCS box containing 4 [Source:MGI Symbol;Acc:MGI:2183445]	1.96695	2.53244	67.5868	2.01614e-16	4.86035e-15
ENSMUSG00000066406	75547	Akap13	A kinase (PRKA) anchor protein 13 [Source:MGI Symbol;Acc:MGI:2676556]	-1.67474	4.71585	67.5429	2.06152e-16	4.96256e-15
ENSMUSG00000025239	29806	Limd1	LIM domains containing 1 [Source:MGI Symbol;Acc:MGI:1352502]	-2.15962	3.8552	67.5372	2.06744e-16	4.96963e-15
ENSMUSG00000091387	218476	Gcnt4	glucosaminyl (N-acetyl) transferase 4, core 2 (beta-1,6-N-acetylglucosaminyltransferase) [Source:MGI Symbol;Acc:MGI:2684919]	-2.38549	2.94223	67.4513	2.15959e-16	5.18363e-15
ENSMUSG00000028790	20218	Khdrbs1	KH domain containing, RNA binding, signal transduction associated 1 [Source:MGI Symbol;Acc:MGI:893579]	1.10576	5.84487	67.4468	2.16446e-16	5.18784e-15
ENSMUSG00000020440	11844	Arf5	ADP-ribosylation factor 5 [Source:MGI Symbol;Acc:MGI:99434]	1.40495	6.22835	67.4353	2.17712e-16	5.21068e-15
ENSMUSG00000038690	57423	Atp5j2	ATP synthase, H+ transporting, mitochondrial F0 complex, subunit F2 [Source:MGI Symbol;Acc:MGI:1927558]	1.81484	8.66394	67.4056	2.21024e-16	5.27837e-15
ENSMUSG00000002833	15193	Hdgfrp2	hepatoma-derived growth factor, related protein 2 [Source:MGI Symbol;Acc:MGI:1194492]	1.40251	4.15581	67.4042	2.21175e-16	5.27837e-15
ENSMUSG00000039830	50913	Olig2	oligodendrocyte transcription factor 2 [Source:MGI Symbol;Acc:MGI:1355331]	-2.46691	3.35958	67.349	2.27461e-16	5.4206e-15
ENSMUSG00000048271	381626	Rbm33	RNA binding motif protein 33 [Source:MGI Symbol;Acc:MGI:1919670]	-1.07803	5.00581	67.3199	2.30836e-16	5.49317e-15
ENSMUSG00000048481	232934	Mypop	Myb-related transcription factor, partner of profilin [Source:MGI Symbol;Acc:MGI:2446472]	1.4097	3.88077	67.2831	2.35192e-16	5.58885e-15
ENSMUSG00000022840	224129	Adcy5	adenylate cyclase 5 [Source:MGI Symbol;Acc:MGI:99673]	1.49745	8.05031	67.2183	2.43049e-16	5.7673e-15
ENSMUSG00000035585	66078	Tsen34	tRNA splicing endonuclease subunit 34 [Source:MGI Symbol;Acc:MGI:1913328]	1.52989	4.52321	67.1868	2.46967e-16	5.85191e-15
ENSMUSG00000030108	14412	Slc6a13	solute carrier family 6 (neurotransmitter transporter, GABA), member 13 [Source:MGI Symbol;Acc:MGI:95629]	-3.07657	2.58124	67.1742	2.48541e-16	5.88084e-15
ENSMUSG00000022708	56490	Zbtb20	zinc finger and BTB domain containing 20 [Source:MGI Symbol;Acc:MGI:1929213]	-2.28572	8.18325	67.1303	2.54137e-16	6.00471e-15
ENSMUSG00000031386	15161	Hcfc1	host cell factor C1 [Source:MGI Symbol;Acc:MGI:105942]	-1.01338	5.71401	67.0587	2.63544e-16	6.21814e-15
ENSMUSG00000049493	102502	Pls1	plastin 1 (I-isoform) [Source:MGI Symbol;Acc:MGI:104809]	-1.90009	3.65761	67.0474	2.65061e-16	6.24508e-15
ENSMUSG00000010607	66268	Pigyl	phosphatidylinositol glycan anchor biosynthesis, class Y-like [Source:MGI Symbol;Acc:MGI:1913518]	1.52508	4.01047	67.0314	2.67215e-16	6.28693e-15
ENSMUSG00000031149	54637	Praf2	PRA1 domain family 2 [Source:MGI Symbol;Acc:MGI:1859607]	1.63326	6.46304	66.8772	2.88953e-16	6.78877e-15
ENSMUSG00000037916	17995	Ndufv1	NADH dehydrogenase (ubiquinone) flavoprotein 1 [Source:MGI Symbol;Acc:MGI:107851]	1.22793	7.48113	66.8053	2.99691e-16	7.03111e-15
ENSMUSG00000037984	11922	Neurod6	neurogenic differentiation 6 [Source:MGI Symbol;Acc:MGI:106593]	-2.86151	6.21886	66.7782	3.0384e-16	7.11359e-15
ENSMUSG00000039252	246316	Lgi2	leucine-rich repeat LGI family, member 2 [Source:MGI Symbol;Acc:MGI:2180196]	1.4582	5.4453	66.7768	3.04062e-16	7.11359e-15
ENSMUSG00000031932	14608	Gpr83	G protein-coupled receptor 83 [Source:MGI Symbol;Acc:MGI:95712]	1.45189	6.42348	66.7349	3.10587e-16	7.25603e-15
ENSMUSG00000004642	20492	Slbp	stem-loop binding protein [Source:MGI Symbol;Acc:MGI:108402]	1.27261	4.47614	66.6396	3.25968e-16	7.6047e-15
ENSMUSG00000085007	NA	Gm11549	predicted gene 11549 [Source:MGI Symbol;Acc:MGI:3650339]	-1.85478	5.38628	66.5865	3.34873e-16	7.8015e-15
ENSMUSG00000022687	117606	Boc	biregional cell adhesion molecule-related/down-regulated by oncogenes (Cdon) binding protein [Source:MGI Symbol;Acc:MGI:2151153]	-2.5254	3.30305	66.5582	3.39711e-16	7.90314e-15
ENSMUSG00000027080	381379	Med19	mediator complex subunit 19 [Source:MGI Symbol;Acc:MGI:1914234]	0.9846	5.07199	66.5505	3.41051e-16	7.92324e-15
ENSMUSG00000061702	320208	Tmem91	transmembrane protein 91 [Source:MGI Symbol;Acc:MGI:2443589]	1.57936	5.58752	66.5122	3.47736e-16	8.06727e-15
ENSMUSG00000020722	12299	Cacng1	calcium channel, voltage-dependent, gamma subunit 1 [Source:MGI Symbol;Acc:MGI:1206582]	3.48094	0.97303	66.4245	3.63558e-16	8.42259e-15
ENSMUSG00000032297	76183	Celf6	CUGBP, Elav-like family member 6 [Source:MGI Symbol;Acc:MGI:1923433]	1.95211	3.65095	66.3039	3.86494e-16	8.9363e-15
ENSMUSG00000025207	26456	Sema4g	sema domain, immunoglobulin domain (Ig), transmembrane domain (TM) and short cytoplasmic domain, (semaphorin) 4G [Source:MGI Symbol;Acc:MGI:1347047]	1.35214	4.56462	66.3023	3.86806e-16	8.9363e-15
ENSMUSG00000065990	66077	Aurkaip1	aurora kinase A interacting protein 1 [Source:MGI Symbol;Acc:MGI:1913327]	1.43659	5.94073	66.2658	3.94029e-16	9.09054e-15
ENSMUSG00000029507	56361	Pus1	pseudouridine synthase 1 [Source:MGI Symbol;Acc:MGI:1929237]	1.42581	3.57835	66.2462	3.97983e-16	9.16904e-15
ENSMUSG00000025083	226250	Afap1l2	actin filament associated protein 1-like 2 [Source:MGI Symbol;Acc:MGI:2147658]	-2.67494	2.1447	66.241	3.99017e-16	9.18014e-15
ENSMUSG00000037979	215707	Ccdc92	coiled-coil domain containing 92 [Source:MGI Symbol;Acc:MGI:106485]	1.31484	5.12736	66.1164	4.25055e-16	9.7657e-15
ENSMUSG00000073680	320587	Tmem88b	transmembrane protein 88B [Source:MGI Symbol;Acc:MGI:2444329]	-2.40625	5.63748	66.1029	4.27982e-16	9.81938e-15
ENSMUSG00000055415	319767	Atp10b	ATPase, class V, type 10B [Source:MGI Symbol;Acc:MGI:2442688]	-2.70687	1.86434	66.0913	4.30507e-16	9.8637e-15
ENSMUSG00000019988	17997	Nedd1	neural precursor cell expressed, developmentally down-regulated gene 1 [Source:MGI Symbol;Acc:MGI:97293]	-2.41137	1.70146	66.0256	4.45099e-16	1.0184e-14
ENSMUSG00000100147	NA	1700047M11Rik	RIKEN cDNA 1700047M11 gene [Source:MGI Symbol;Acc:MGI:1914580]	-2.48667	4.26697	65.987	4.5391e-16	1.03713e-14
ENSMUSG00000041084	66357	Ostc	oligosaccharyltransferase complex subunit (non-catalytic) [Source:MGI Symbol;Acc:MGI:1913607]	1.21905	6.73092	65.9726	4.5723e-16	1.04329e-14
ENSMUSG00000058351	66487	Smim4	small integral membrane protein 4 [Source:MGI Symbol;Acc:MGI:1913737]	1.8082	4.29726	65.9651	4.58976e-16	1.04584e-14
ENSMUSG00000016494	12490	Cd34	CD34 antigen [Source:MGI Symbol;Acc:MGI:88329]	-2.08013	5.71341	65.9281	4.67683e-16	1.06422e-14
ENSMUSG00000039706	16826	Ldb2	LIM domain binding 2 [Source:MGI Symbol;Acc:MGI:894670]	-1.33802	5.7009	65.8502	4.86531e-16	1.1056e-14
ENSMUSG00000026672	71648	Optn	optineurin [Source:MGI Symbol;Acc:MGI:1918898]	1.33409	3.675	65.8424	4.88469e-16	1.10848e-14
ENSMUSG00000020163	66594	Uqcr11	ubiquinol-cytochrome c reductase, complex III subunit XI [Source:MGI Symbol;Acc:MGI:1913844]	1.94867	8.27246	65.8351	4.90274e-16	1.11107e-14
ENSMUSG00000027313	69065	Chac1	ChaC, cation transport regulator 1 [Source:MGI Symbol;Acc:MGI:1916315]	1.57444	2.74697	65.8224	4.93433e-16	1.1167e-14
ENSMUSG00000037646	666173	Vps13b	vacuolar protein sorting 13B [Source:MGI Symbol;Acc:MGI:1916380]	-1.30111	5.1194	65.7862	5.02599e-16	1.1359e-14
ENSMUSG00000020300	67579	Cpeb4	cytoplasmic polyadenylation element binding protein 4 [Source:MGI Symbol;Acc:MGI:1914829]	-1.17661	5.64644	65.7753	5.05366e-16	1.1406e-14
ENSMUSG00000042045	66402	Sln	sarcolipin [Source:MGI Symbol;Acc:MGI:1913652]	2.31827	3.19238	65.7347	5.1589e-16	1.1623e-14
ENSMUSG00000026279	67026	Thap4	THAP domain containing 4 [Source:MGI Symbol;Acc:MGI:1914276]	1.29251	4.04357	65.7329	5.16374e-16	1.1623e-14
ENSMUSG00000055681	59042	Cope	coatomer protein complex, subunit epsilon [Source:MGI Symbol;Acc:MGI:1891702]	1.01915	7.24264	65.6491	5.38797e-16	1.21113e-14
ENSMUSG00000057411	214917	Fam173a	family with sequence similarity 173, member A [Source:MGI Symbol;Acc:MGI:2384888]	1.14313	5.92183	65.6261	5.45117e-16	1.22368e-14
ENSMUSG00000033177	208171	Tmprss7	transmembrane serine protease 7 [Source:MGI Symbol;Acc:MGI:2686594]	-2.7606	3.05258	65.6143	5.48385e-16	1.22936e-14
ENSMUSG00000022150	13132	Dab2	disabled 2, mitogen-responsive phosphoprotein [Source:MGI Symbol;Acc:MGI:109175]	-2.03235	3.26971	65.5674	5.61604e-16	1.2573e-14
ENSMUSG00000023391	13392	Dlx2	distal-less homeobox 2 [Source:MGI Symbol;Acc:MGI:94902]	2.55386	2.0224	65.538	5.7004e-16	1.27447e-14
ENSMUSG00000039103	68810	Nexn	nexilin [Source:MGI Symbol;Acc:MGI:1916060]	2.15786	4.80976	65.5092	5.78438e-16	1.29151e-14
ENSMUSG00000032733	235406	Snx33	sorting nexin 33 [Source:MGI Symbol;Acc:MGI:2443239]	-2.28346	2.45177	65.482	5.86471e-16	1.30769e-14
ENSMUSG00000001334	384061	Fndc5	fibronectin type III domain containing 5 [Source:MGI Symbol;Acc:MGI:1917614]	1.21017	7.05073	65.449	5.96363e-16	1.32797e-14
ENSMUSG00000032085	21345	Tagln	transgelin [Source:MGI Symbol;Acc:MGI:106012]	2.09587	2.59837	65.442	5.98492e-16	1.33092e-14
ENSMUSG00000000563	11950	Atp5f1	ATP synthase, H+ transporting, mitochondrial F0 complex, subunit B1 [Source:MGI Symbol;Acc:MGI:1100495]	1.34332	8.74617	65.4342	6.00883e-16	1.33446e-14
ENSMUSG00000002068	12447	Ccne1	cyclin E1 [Source:MGI Symbol;Acc:MGI:88316]	1.32444	4.82325	65.423	6.0429e-16	1.34024e-14
ENSMUSG00000001773	53320	Folh1	folate hydrolase 1 [Source:MGI Symbol;Acc:MGI:1858193]	-2.86531	2.39897	65.4113	6.07893e-16	1.34643e-14
ENSMUSG00000040521	66399	Tsfm	Ts translation elongation factor, mitochondrial [Source:MGI Symbol;Acc:MGI:1913649]	1.4958	3.58338	65.379	6.17944e-16	1.36519e-14
ENSMUSG00000087260	68576	Lamtor5	late endosomal/lysosomal adaptor, MAPK and MTOR activator 5 [Source:MGI Symbol;Acc:MGI:1915826]	1.26196	5.94186	65.3788	6.18002e-16	1.36519e-14
ENSMUSG00000049649	14748	Gpr3	G-protein coupled receptor 3 [Source:MGI Symbol;Acc:MGI:101908]	1.7845	2.52495	65.2773	6.50675e-16	1.43545e-14
ENSMUSG00000009569	239719	Mkl2	MKL/myocardin-like 2 [Source:MGI Symbol;Acc:MGI:3050795]	-1.437	7.89073	65.2336	6.65239e-16	1.46564e-14
ENSMUSG00000048772	68777	Tmem53	transmembrane protein 53 [Source:MGI Symbol;Acc:MGI:1916027]	1.76148	2.5539	65.2127	6.72341e-16	1.47933e-14
ENSMUSG00000033061	19711	Resp18	regulated endocrine-specific protein 18 [Source:MGI Symbol;Acc:MGI:1098222]	1.7163	7.54785	65.1753	6.85215e-16	1.50566e-14
ENSMUSG00000024816	67457	Frmd8	FERM domain containing 8 [Source:MGI Symbol;Acc:MGI:1914707]	-1.77536	3.61567	65.1101	7.08278e-16	1.55429e-14
ENSMUSG00000028211	60599	Trp53inp1	transformation related protein 53 inducible nuclear protein 1 [Source:MGI Symbol;Acc:MGI:1926609]	-2.19559	3.13494	65.0497	7.30343e-16	1.6006e-14
ENSMUSG00000074738	230991	Fndc10	fibronectin type III domain containing 10 [Source:MGI Symbol;Acc:MGI:2444790]	1.3054	3.91762	65.038	7.34686e-16	1.60689e-14
ENSMUSG00000037152	66377	Ndufc1	NADH dehydrogenase (ubiquinone) 1, subcomplex unknown, 1 [Source:MGI Symbol;Acc:MGI:1913627]	1.89445	8.18922	65.0367	7.35148e-16	1.60689e-14
ENSMUSG00000030268	12035	Bcat1	branched chain aminotransferase 1, cytosolic [Source:MGI Symbol;Acc:MGI:104861]	1.24297	7.10159	64.9931	7.51603e-16	1.6407e-14
ENSMUSG00000035637	76238	Grhpr	glyoxylate reductase/hydroxypyruvate reductase [Source:MGI Symbol;Acc:MGI:1923488]	1.19906	4.68709	64.9549	7.66307e-16	1.67061e-14
ENSMUSG00000057719	269016	Sh3rf2	SH3 domain containing ring finger 2 [Source:MGI Symbol;Acc:MGI:2444628]	2.25662	3.20597	64.8844	7.94241e-16	1.72924e-14
ENSMUSG00000024218	68776	Taf11	TATA-box binding protein associated factor 11 [Source:MGI Symbol;Acc:MGI:1916026]	1.06951	4.96401	64.8762	7.97565e-16	1.73421e-14
ENSMUSG00000050856	11958	Atp5k	ATP synthase, H+ transporting, mitochondrial F1F0 complex, subunit E [Source:MGI Symbol;Acc:MGI:106636]	1.90168	9.01911	64.8216	8.1994e-16	1.78053e-14
ENSMUSG00000005575	22192	Ube2m	ubiquitin-conjugating enzyme E2M [Source:MGI Symbol;Acc:MGI:108278]	1.42921	6.39774	64.7694	8.41961e-16	1.82597e-14
ENSMUSG00000016458	22431	Wt1	Wilms tumor 1 homolog [Source:MGI Symbol;Acc:MGI:98968]	2.35855	1.07511	64.7668	8.43071e-16	1.82599e-14
ENSMUSG00000001056	52530	Nhp2	NHP2 ribonucleoprotein [Source:MGI Symbol;Acc:MGI:1098547]	1.08422	5.26452	64.7609	8.45586e-16	1.82906e-14
ENSMUSG00000032740	108686	Ccdc88a	coiled coil domain containing 88A [Source:MGI Symbol;Acc:MGI:1925177]	-1.00333	6.87839	64.7301	8.58933e-16	1.85552e-14
ENSMUSG00000005501	227334	Usp40	ubiquitin specific peptidase 40 [Source:MGI Symbol;Acc:MGI:2443184]	-2.00511	4.57198	64.7232	8.6193e-16	1.85958e-14
ENSMUSG00000036362	74191	P2ry13	purinergic receptor P2Y, G-protein coupled 13 [Source:MGI Symbol;Acc:MGI:1921441]	-2.09383	3.84048	64.7157	8.65229e-16	1.86428e-14
ENSMUSG00000022468	19011	Endou	endonuclease, polyU-specific [Source:MGI Symbol;Acc:MGI:97746]	-2.74475	2.37276	64.7088	8.68253e-16	1.86837e-14
ENSMUSG00000027366	66552	Sppl2a	signal peptide peptidase like 2A [Source:MGI Symbol;Acc:MGI:1913802]	-1.15661	5.9775	64.6405	8.98905e-16	1.93183e-14
ENSMUSG00000024431	14815	Nr3c1	nuclear receptor subfamily 3, group C, member 1 [Source:MGI Symbol;Acc:MGI:95824]	-1.2424	6.49516	64.6132	9.11408e-16	1.95519e-14
ENSMUSG00000026436	13714	Elk4	ELK4, member of ETS oncogene family [Source:MGI Symbol;Acc:MGI:102853]	-1.17096	5.36094	64.6117	9.12122e-16	1.95519e-14
ENSMUSG00000001520	60345	Nrip2	nuclear receptor interacting protein 2 [Source:MGI Symbol;Acc:MGI:1891884]	1.49143	4.67575	64.6003	9.174e-16	1.96397e-14
ENSMUSG00000034320	13521	Slc26a2	solute carrier family 26 (sulfate transporter), member 2 [Source:MGI Symbol;Acc:MGI:892977]	-1.65315	3.93602	64.4816	9.74374e-16	2.08225e-14
ENSMUSG00000063632	20666	Sox11	SRY (sex determining region Y)-box 11 [Source:MGI Symbol;Acc:MGI:98359]	-1.5995	6.94132	64.48	9.75154e-16	2.08225e-14
ENSMUSG00000029622	11867	Arpc1b	actin related protein 2/3 complex, subunit 1B [Source:MGI Symbol;Acc:MGI:1343142]	-2.03857	4.7115	64.3789	1.02651e-15	2.18911e-14
ENSMUSG00000041974	224008	Spidr	scaffolding protein involved in DNA repair [Source:MGI Symbol;Acc:MGI:1924834]	-2.4516	1.58284	64.3566	1.0382e-15	2.2108e-14
ENSMUSG00000020774	11484	Aspa	aspartoacylase [Source:MGI Symbol;Acc:MGI:87914]	-2.46433	4.26484	64.3544	1.03934e-15	2.2108e-14
ENSMUSG00000051518	66538	Rps19bp1	ribosomal protein S19 binding protein 1 [Source:MGI Symbol;Acc:MGI:1913788]	1.46294	3.84928	64.2757	1.08172e-15	2.29801e-14
ENSMUSG00000005125	17988	Ndrg1	N-myc downstream regulated gene 1 [Source:MGI Symbol;Acc:MGI:1341799]	-2.22656	5.1382	64.2546	1.09336e-15	2.31977e-14
ENSMUSG00000015804	66999	Med28	mediator complex subunit 28 [Source:MGI Symbol;Acc:MGI:1914249]	1.22556	6.04349	64.2252	1.10983e-15	2.35171e-14
ENSMUSG00000025582	18164	Nptx1	neuronal pentraxin 1 [Source:MGI Symbol;Acc:MGI:107811]	-2.15405	7.05286	64.1903	1.12965e-15	2.38781e-14
ENSMUSG00000015013	59005	Trappc2l	trafficking protein particle complex 2-like [Source:MGI Symbol;Acc:MGI:1916295]	1.2419	7.09753	64.1892	1.13029e-15	2.38781e-14
ENSMUSG00000040055	14623	Gjb6	gap junction protein, beta 6 [Source:MGI Symbol;Acc:MGI:107588]	-2.16715	7.05266	64.1876	1.13117e-15	2.38781e-14
ENSMUSG00000028927	18600	Padi2	peptidyl arginine deiminase, type II [Source:MGI Symbol;Acc:MGI:1338892]	-2.15545	4.09224	64.0927	1.18698e-15	2.50244e-14
ENSMUSG00000016252	67126	Atp5e	ATP synthase, H+ transporting, mitochondrial F1 complex, epsilon subunit [Source:MGI Symbol;Acc:MGI:1855697]	1.76632	8.4215	64.0752	1.1976e-15	2.52163e-14
ENSMUSG00000038412	56295	Higd1a	HIG1 domain family, member 1A [Source:MGI Symbol;Acc:MGI:1930666]	1.23082	7.40486	63.9416	1.28162e-15	2.69514e-14
ENSMUSG00000026347	72160	Tmem163	transmembrane protein 163 [Source:MGI Symbol;Acc:MGI:1919410]	-1.86305	5.2428	63.9286	1.29009e-15	2.70952e-14
ENSMUSG00000024959	12015	Bad	BCL2-associated agonist of cell death [Source:MGI Symbol;Acc:MGI:1096330]	1.47592	4.97349	63.8982	1.31017e-15	2.74822e-14
ENSMUSG00000024759	109168	Atl3	atlastin GTPase 3 [Source:MGI Symbol;Acc:MGI:1924270]	-1.51103	3.55652	63.7479	1.41402e-15	2.96231e-14
ENSMUSG00000004071	66626	Cdip1	cell death inducing Trp53 target 1 [Source:MGI Symbol;Acc:MGI:1913876]	1.21483	8.20049	63.6727	1.46907e-15	3.07378e-14
ENSMUSG00000021576	18570	Pdcd6	programmed cell death 6 [Source:MGI Symbol;Acc:MGI:109283]	1.22417	6.7523	63.6692	1.47165e-15	3.07531e-14
ENSMUSG00000091817	NA	Gm17091	predicted gene 17091 [Source:MGI Symbol;Acc:MGI:4937918]	3.30766	-0.144737	63.6183	1.51022e-15	3.1501e-14
ENSMUSG00000036356	234356	Csgalnact1	chondroitin sulfate N-acetylgalactosaminyltransferase 1 [Source:MGI Symbol;Acc:MGI:2442354]	-1.71728	4.42468	63.617	1.51123e-15	3.1501e-14
ENSMUSG00000049960	66242	Mrps16	mitochondrial ribosomal protein S16 [Source:MGI Symbol;Acc:MGI:1913492]	1.43894	5.24363	63.611	1.51579e-15	3.15565e-14
ENSMUSG00000030786	16409	Itgam	integrin alpha M [Source:MGI Symbol;Acc:MGI:96607]	-2.43674	4.2137	63.5427	1.5693e-15	3.26297e-14
ENSMUSG00000001158	66618	Snrnp27	small nuclear ribonucleoprotein 27 (U4/U6.U5) [Source:MGI Symbol;Acc:MGI:1913868]	1.16898	6.21648	63.5231	1.58499e-15	3.29148e-14
ENSMUSG00000034932	66047	Mrpl54	mitochondrial ribosomal protein L54 [Source:MGI Symbol;Acc:MGI:1913297]	1.72787	4.16203	63.5045	1.60001e-15	3.31853e-14
ENSMUSG00000079654	101359	Prrt4	proline-rich transmembrane protein 4 [Source:MGI Symbol;Acc:MGI:2141677]	2.07293	1.57903	63.4983	1.60507e-15	3.32488e-14
ENSMUSG00000020599	19739	Rgs9	regulator of G-protein signaling 9 [Source:MGI Symbol;Acc:MGI:1338824]	2.01849	5.32119	63.4954	1.60742e-15	3.3256e-14
ENSMUSG00000073678	241062	Pgap1	post-GPI attachment to proteins 1 [Source:MGI Symbol;Acc:MGI:2443342]	-1.30753	5.38139	63.3737	1.70989e-15	3.5332e-14
ENSMUSG00000026787	14417	Gad2	glutamic acid decarboxylase 2 [Source:MGI Symbol;Acc:MGI:95634]	2.07538	8.75764	63.3582	1.72338e-15	3.55667e-14
ENSMUSG00000031740	17390	Mmp2	matrix metallopeptidase 2 [Source:MGI Symbol;Acc:MGI:97009]	-2.34555	2.12452	63.2821	1.79124e-15	3.69213e-14
ENSMUSG00000068391	93696	Chrac1	chromatin accessibility complex 1 [Source:MGI Symbol;Acc:MGI:2135796]	1.12041	4.89544	63.2678	1.80433e-15	3.71166e-14
ENSMUSG00000028982	70556	Slc25a33	solute carrier family 25, member 33 [Source:MGI Symbol;Acc:MGI:1917806]	1.57942	4.83628	63.2668	1.80518e-15	3.71166e-14
ENSMUSG00000024620	18596	Pdgfrb	platelet derived growth factor receptor, beta polypeptide [Source:MGI Symbol;Acc:MGI:97531]	-2.51308	3.22044	63.2616	1.80995e-15	3.71688e-14
ENSMUSG00000030869	70316	Ndufab1	NADH dehydrogenase (ubiquinone) 1, alpha/beta subcomplex, 1 [Source:MGI Symbol;Acc:MGI:1917566]	1.38508	4.74284	63.222	1.84675e-15	3.78777e-14
ENSMUSG00000063018	NA	2010204K13Rik	RIKEN cDNA 2010204K13 gene [Source:MGI Symbol;Acc:MGI:1922859]	2.03203	5.22295	63.2111	1.85698e-15	3.80406e-14
ENSMUSG00000039835	215819	Nhsl1	NHS-like 1 [Source:MGI Symbol;Acc:MGI:106390]	-2.46968	4.79983	63.1802	1.88636e-15	3.85948e-14
ENSMUSG00000021188	109181	Trip11	thyroid hormone receptor interactor 11 [Source:MGI Symbol;Acc:MGI:1924393]	-1.30924	4.74885	63.1778	1.88867e-15	3.85948e-14
ENSMUSG00000050447	320343	Lypd6	LY6/PLAUR domain containing 6 [Source:MGI Symbol;Acc:MGI:2443848]	1.66087	5.77979	63.1668	1.89918e-15	3.87619e-14
ENSMUSG00000061650	192191	Med9	mediator complex subunit 9 [Source:MGI Symbol;Acc:MGI:2183151]	1.28045	4.32269	63.1585	1.90728e-15	3.88794e-14
ENSMUSG00000034789	19336	Rab24	RAB24, member RAS oncogene family [Source:MGI Symbol;Acc:MGI:105065]	1.22977	5.44627	63.1351	1.93008e-15	3.92747e-14
ENSMUSG00000024012	56462	Mtch1	mitochondrial carrier 1 [Source:MGI Symbol;Acc:MGI:1929261]	1.28675	8.31934	63.1337	1.93139e-15	3.92747e-14
ENSMUSG00000048583	16002	Igf2	insulin-like growth factor 2 [Source:MGI Symbol;Acc:MGI:96434]	-2.74988	3.92142	63.1139	1.95089e-15	3.96229e-14
ENSMUSG00000063455	330286	D630045J12Rik	RIKEN cDNA D630045J12 gene [Source:MGI Symbol;Acc:MGI:2669829]	-1.80766	5.5368	63.1086	1.95615e-15	3.96813e-14
ENSMUSG00000025854	80752	Fam20c	family with sequence similarity 20, member C [Source:MGI Symbol;Acc:MGI:2136853]	1.2697	5.00805	63.0425	2.02296e-15	4.09535e-14
ENSMUSG00000061479	53607	Snrpa	small nuclear ribonucleoprotein polypeptide A [Source:MGI Symbol;Acc:MGI:1855690]	1.34453	4.22997	63.0417	2.02379e-15	4.09535e-14
ENSMUSG00000070687	15552	Htr1d	5-hydroxytryptamine (serotonin) receptor 1D [Source:MGI Symbol;Acc:MGI:96276]	2.168	2.21247	62.9648	2.10435e-15	4.25318e-14
ENSMUSG00000055430	58243	Nap1l5	nucleosome assembly protein 1-like 5 [Source:MGI Symbol;Acc:MGI:1923555]	1.98715	8.45498	62.9554	2.11439e-15	4.26829e-14
ENSMUSG00000024059	78785	Clip4	CAP-GLY domain containing linker protein family, member 4 [Source:MGI Symbol;Acc:MGI:1919100]	1.17852	5.86243	62.9522	2.11784e-15	4.27007e-14
ENSMUSG00000096188	97487	Cmtm4	CKLF-like MARVEL transmembrane domain containing 4 [Source:MGI Symbol;Acc:MGI:2142888]	-1.27838	5.83567	62.922	2.15052e-15	4.33072e-14
ENSMUSG00000005699	56513	Pard6a	par-6 family cell polarity regulator alpha [Source:MGI Symbol;Acc:MGI:1927223]	1.24939	5.45408	62.7206	2.38209e-15	4.79126e-14
ENSMUSG00000021556	105348	Golm1	golgi membrane protein 1 [Source:MGI Symbol;Acc:MGI:1917329]	-1.24774	4.85882	62.7177	2.38565e-15	4.79262e-14
ENSMUSG00000037110	241694	Ralgapa2	Ral GTPase activating protein, alpha subunit 2 (catalytic) [Source:MGI Symbol;Acc:MGI:3036245]	-1.75888	4.26053	62.691	2.4182e-15	4.85215e-14
ENSMUSG00000057497	66488	Fam136a	family with sequence similarity 136, member A [Source:MGI Symbol;Acc:MGI:1913738]	1.0301	5.23595	62.6578	2.45928e-15	4.92863e-14
ENSMUSG00000074872	381418	Ctxn2	cortexin 2 [Source:MGI Symbol;Acc:MGI:2139444]	1.94507	5.34962	62.6255	2.50001e-15	5.00424e-14
ENSMUSG00000046818	73284	Ddit4l	DNA-damage-inducible transcript 4-like [Source:MGI Symbol;Acc:MGI:1920534]	-1.67923	5.33816	62.6041	2.52732e-15	5.05282e-14
ENSMUSG00000024570	68731	Rbfa	ribosome binding factor A [Source:MGI Symbol;Acc:MGI:1915981]	1.5133	3.24524	62.5944	2.5398e-15	5.07168e-14
ENSMUSG00000031781	109006	Ciapin1	cytokine induced apoptosis inhibitor 1 [Source:MGI Symbol;Acc:MGI:1922083]	0.961511	6.02566	62.5481	2.60012e-15	5.18589e-14
ENSMUSG00000040811	72205	Eml2	echinoderm microtubule associated protein like 2 [Source:MGI Symbol;Acc:MGI:1919455]	1.39692	5.10685	62.5363	2.61573e-15	5.20849e-14
ENSMUSG00000036278	107227	Macrod1	MACRO domain containing 1 [Source:MGI Symbol;Acc:MGI:2147583]	2.26997	2.35769	62.5349	2.61771e-15	5.20849e-14
ENSMUSG00000029166	100732	Mapre3	microtubule-associated protein, RP/EB family, member 3 [Source:MGI Symbol;Acc:MGI:2140967]	1.17665	5.99233	62.5133	2.64647e-15	5.25942e-14
ENSMUSG00000030889	233813	Vwa3a	von Willebrand factor A domain containing 3A [Source:MGI Symbol;Acc:MGI:3041229]	-2.76444	1.89702	62.4762	2.69682e-15	5.35308e-14
ENSMUSG00000033054	244879	Npat	nuclear protein in the AT region [Source:MGI Symbol;Acc:MGI:107605]	-1.21979	4.30642	62.4297	2.76122e-15	5.4744e-14
ENSMUSG00000024346	67199	Pfdn1	prefoldin 1 [Source:MGI Symbol;Acc:MGI:1914449]	1.36997	6.81461	62.359	2.86215e-15	5.66774e-14
ENSMUSG00000027177	15259	Hipk3	homeodomain interacting protein kinase 3 [Source:MGI Symbol;Acc:MGI:1314882]	-1.23732	5.54286	62.3292	2.90587e-15	5.74748e-14
ENSMUSG00000025358	12566	Cdk2	cyclin-dependent kinase 2 [Source:MGI Symbol;Acc:MGI:104772]	-3.51366	0.774695	62.2865	2.96958e-15	5.86651e-14
ENSMUSG00000006050	24068	Sra1	steroid receptor RNA activator 1 [Source:MGI Symbol;Acc:MGI:1344414]	1.0849	6.7545	62.2415	3.03814e-15	5.99483e-14
ENSMUSG00000026354	226413	Lct	lactase [Source:MGI Symbol;Acc:MGI:104576]	-1.83718	1.96994	62.2339	3.0499e-15	6.0109e-14
ENSMUSG00000004341	75512	Gpx6	glutathione peroxidase 6 [Source:MGI Symbol;Acc:MGI:1922762]	2.99193	1.19915	62.2023	3.09927e-15	6.10098e-14
ENSMUSG00000059278	78304	Naa38	N(alpha)-acetyltransferase 38, NatC auxiliary subunit [Source:MGI Symbol;Acc:MGI:1925554]	1.5255	5.59574	62.1887	3.12071e-15	6.13592e-14
ENSMUSG00000029084	12494	Cd38	CD38 antigen [Source:MGI Symbol;Acc:MGI:107474]	-3.69556	3.37844	62.1795	3.13541e-15	6.15755e-14
ENSMUSG00000029713	14693	Gnb2	guanine nucleotide binding protein (G protein), beta 2 [Source:MGI Symbol;Acc:MGI:95784]	1.06494	5.94199	62.1712	3.14862e-15	6.17056e-14
ENSMUSG00000029918	14548	Mrps33	mitochondrial ribosomal protein S33 [Source:MGI Symbol;Acc:MGI:1338046]	1.49929	5.58398	62.1707	3.14946e-15	6.17056e-14
ENSMUSG00000051851	72865	Cxx1c	CAAX box 1C [Source:MGI Symbol;Acc:MGI:1920115]	1.36868	6.61015	62.1381	3.20196e-15	6.26605e-14
ENSMUSG00000020116	66249	Pno1	partner of NOB1 homolog [Source:MGI Symbol;Acc:MGI:1913499]	1.17917	4.82801	62.1159	3.23833e-15	6.32978e-14
ENSMUSG00000054387	17248	Mdm4	transformed mouse 3T3 cell double minute 4 [Source:MGI Symbol;Acc:MGI:107934]	-1.30223	5.40417	62.1123	3.24416e-15	6.33372e-14
ENSMUSG00000031902	18021	Nfatc3	nuclear factor of activated T cells, cytoplasmic, calcineurin dependent 3 [Source:MGI Symbol;Acc:MGI:103296]	-1.9512	2.06328	62.1061	3.25444e-15	6.34634e-14
ENSMUSG00000024829	353242	Mrpl21	mitochondrial ribosomal protein L21 [Source:MGI Symbol;Acc:MGI:2660674]	1.27972	5.70155	62.1037	3.25838e-15	6.34659e-14
ENSMUSG00000026463	381290	Atp2b4	ATPase, Ca++ transporting, plasma membrane 4 [Source:MGI Symbol;Acc:MGI:88111]	-1.7253	7.70367	62.0561	3.33818e-15	6.49441e-14
ENSMUSG00000020096	65971	Tbata	thymus, brain and testes associated [Source:MGI Symbol;Acc:MGI:1923820]	-2.15103	2.0675	61.98	3.4696e-15	6.74152e-14
ENSMUSG00000034714	117160	Ttyh2	tweety family member 2 [Source:MGI Symbol;Acc:MGI:2157091]	-3.02624	6.72756	61.9779	3.4733e-15	6.74152e-14
ENSMUSG00000041881	66416	Ndufa7	NADH dehydrogenase (ubiquinone) 1 alpha subcomplex, 7 (B14.5a) [Source:MGI Symbol;Acc:MGI:1913666]	1.54701	7.84862	61.9487	3.5253e-15	6.83447e-14
ENSMUSG00000022799	12549	Arhgap31	Rho GTPase activating protein 31 [Source:MGI Symbol;Acc:MGI:1333857]	-1.54381	4.13416	61.9245	3.56878e-15	6.91072e-14
ENSMUSG00000097452	NA	Gm2824	predicted gene 2824 [Source:MGI Symbol;Acc:MGI:3780995]	-1.98598	2.03756	61.9061	3.60238e-15	6.96768e-14
ENSMUSG00000021171	52635	Esyt2	extended synaptotagmin-like protein 2 [Source:MGI Symbol;Acc:MGI:1261845]	-1.29639	4.62001	61.804	3.794e-15	7.32977e-14
ENSMUSG00000022427	223696	Tomm22	translocase of outer mitochondrial membrane 22 homolog (yeast) [Source:MGI Symbol;Acc:MGI:2450248]	1.20551	5.71532	61.7997	3.80228e-15	7.33725e-14
ENSMUSG00000035530	20918	Eif1	eukaryotic translation initiation factor 1 [Source:MGI Symbol;Acc:MGI:105125]	1.26154	7.37163	61.7434	3.91259e-15	7.54137e-14
ENSMUSG00000035275	242570	Raver2	ribonucleoprotein, PTB-binding 2 [Source:MGI Symbol;Acc:MGI:2443623]	-1.91753	3.70069	61.7372	3.92488e-15	7.55629e-14
ENSMUSG00000028070	246703	Apoa1bp	apolipoprotein A-I binding protein [Source:MGI Symbol;Acc:MGI:2180167]	1.06608	5.50343	61.722	3.95541e-15	7.60627e-14
ENSMUSG00000021290	70257	2010107E04Rik	RIKEN cDNA 2010107E04 gene [Source:MGI Symbol;Acc:MGI:1917507]	1.81294	8.76915	61.7037	3.99236e-15	7.66847e-14
ENSMUSG00000048424	223332	Ranbp3l	RAN binding protein 3-like [Source:MGI Symbol;Acc:MGI:2444654]	-2.91189	2.32236	61.6761	4.04863e-15	7.76758e-14
ENSMUSG00000029715	74097	Pop7	processing of precursor 7, ribonuclease P family, (S. cerevisiae) [Source:MGI Symbol;Acc:MGI:1921347]	1.11425	4.86716	61.5786	4.25407e-15	8.15233e-14
ENSMUSG00000085133	NA	B930095G15Rik	RIKEN cDNA B930095G15 gene [Source:MGI Symbol;Acc:MGI:2443701]	-2.71356	7.6973	61.5295	4.36166e-15	8.34888e-14
ENSMUSG00000031538	18791	Plat	plasminogen activator, tissue [Source:MGI Symbol;Acc:MGI:97610]	-1.62632	5.59651	61.4205	4.60996e-15	8.81403e-14
ENSMUSG00000034566	71679	Atp5h	ATP synthase, H+ transporting, mitochondrial F0 complex, subunit D [Source:MGI Symbol;Acc:MGI:1918929]	1.4956	7.21945	61.3915	4.67815e-15	8.93413e-14
ENSMUSG00000045316	68636	Fahd1	fumarylacetoacetate hydrolase domain containing 1 [Source:MGI Symbol;Acc:MGI:1915886]	1.21692	4.37987	61.3864	4.69033e-15	8.94713e-14
ENSMUSG00000030671	18576	Pde3b	phosphodiesterase 3B, cGMP-inhibited [Source:MGI Symbol;Acc:MGI:1333863]	-1.6583	3.62795	61.3449	4.79027e-15	9.12731e-14
ENSMUSG00000076439	17441	Mog	myelin oligodendrocyte glycoprotein [Source:MGI Symbol;Acc:MGI:97435]	-2.69131	8.2516	61.333	4.81928e-15	9.17207e-14
ENSMUSG00000030697	56420	Ppp4c	protein phosphatase 4, catalytic subunit [Source:MGI Symbol;Acc:MGI:1891763]	1.31654	4.17406	61.3029	4.89366e-15	9.30299e-14
ENSMUSG00000035242	18245	Oaz1	ornithine decarboxylase antizyme 1 [Source:MGI Symbol;Acc:MGI:109433]	1.61278	5.59501	61.2335	5.0692e-15	9.6257e-14
ENSMUSG00000030047	232201	Arhgap25	Rho GTPase activating protein 25 [Source:MGI Symbol;Acc:MGI:2443687]	-2.01805	3.26896	61.2261	5.08831e-15	9.65096e-14
ENSMUSG00000037926	237860	Ssh2	slingshot homolog 2 (Drosophila) [Source:MGI Symbol;Acc:MGI:2679255]	-1.18104	5.51658	61.1458	5.30014e-15	1.00413e-13
ENSMUSG00000035273	15442	Hpse	heparanase [Source:MGI Symbol;Acc:MGI:1343124]	2.1202	1.64575	61.1343	5.33114e-15	1.00885e-13
ENSMUSG00000038055	58239	Dexi	dexamethasone-induced transcript [Source:MGI Symbol;Acc:MGI:1926236]	1.36572	4.26692	61.0982	5.42969e-15	1.02634e-13
ENSMUSG00000051502	70240	Ufsp1	UFM1-specific peptidase 1 [Source:MGI Symbol;Acc:MGI:1917490]	1.5739	2.44177	61.0287	5.62478e-15	1.062e-13
ENSMUSG00000035992	216742	Fnip1	folliculin interacting protein 1 [Source:MGI Symbol;Acc:MGI:2444668]	-1.05328	5.31414	60.9748	5.78094e-15	1.09025e-13
ENSMUSG00000044894	22272	Uqcrq	ubiquinol-cytochrome c reductase, complex III subunit VII [Source:MGI Symbol;Acc:MGI:107807]	1.71913	9.37045	60.919	5.9472e-15	1.12034e-13
ENSMUSG00000052428	68944	Tmco1	transmembrane and coiled-coil domains 1 [Source:MGI Symbol;Acc:MGI:1921173]	1.01899	6.60962	60.9054	5.9884e-15	1.12682e-13
ENSMUSG00000026393	59125	Nek7	NIMA (never in mitosis gene a)-related expressed kinase 7 [Source:MGI Symbol;Acc:MGI:1890645]	1.5069	6.96664	60.8609	6.12533e-15	1.15128e-13
ENSMUSG00000026915	20744	Strbp	spermatid perinuclear RNA binding protein [Source:MGI Symbol;Acc:MGI:104626]	-1.49298	8.52235	60.8402	6.19024e-15	1.16217e-13
ENSMUSG00000032558	74025	Nphp3	nephronophthisis 3 (adolescent) [Source:MGI Symbol;Acc:MGI:1921275]	-2.78444	1.51245	60.8228	6.24491e-15	1.17111e-13
ENSMUSG00000000290	16414	Itgb2	integrin beta 2 [Source:MGI Symbol;Acc:MGI:96611]	-2.82211	2.34512	60.8102	6.28509e-15	1.17732e-13
ENSMUSG00000027365	58800	Trpm7	transient receptor potential cation channel, subfamily M, member 7 [Source:MGI Symbol;Acc:MGI:1929996]	-1.49158	4.87314	60.7457	6.49443e-15	1.21517e-13
ENSMUSG00000036860	67212	Mrpl55	mitochondrial ribosomal protein L55 [Source:MGI Symbol;Acc:MGI:1914462]	1.20965	6.28159	60.7411	6.50952e-15	1.21662e-13
ENSMUSG00000064264	232969	Zfp428	zinc finger protein 428 [Source:MGI Symbol;Acc:MGI:1916463]	1.81173	2.10955	60.7257	6.56094e-15	1.22486e-13
ENSMUSG00000002996	73389	Hbp1	high mobility group box transcription factor 1 [Source:MGI Symbol;Acc:MGI:894659]	-1.00986	5.59972	60.6796	6.7161e-15	1.25242e-13
ENSMUSG00000021982	71891	Cdadc1	cytidine and dCMP deaminase domain containing 1 [Source:MGI Symbol;Acc:MGI:1919141]	1.08798	5.45827	60.6551	6.80045e-15	1.26673e-13
ENSMUSG00000034317	66949	Trim59	tripartite motif-containing 59 [Source:MGI Symbol;Acc:MGI:1914199]	-1.82587	3.49844	60.6171	6.93296e-15	1.28996e-13
ENSMUSG00000022706	18100	Mrpl40	mitochondrial ribosomal protein L40 [Source:MGI Symbol;Acc:MGI:1332635]	1.19773	5.08107	60.4236	7.64895e-15	1.42159e-13
ENSMUSG00000064179	21955	Tnnt1	troponin T1, skeletal, slow [Source:MGI Symbol;Acc:MGI:1333868]	2.35339	2.08398	60.4209	7.65957e-15	1.42198e-13
ENSMUSG00000026721	29809	Rabgap1l	RAB GTPase activating protein 1-like [Source:MGI Symbol;Acc:MGI:1352507]	-1.16966	6.32232	60.413	7.6904e-15	1.42611e-13
ENSMUSG00000004285	66144	Atp6v1f	ATPase, H+ transporting, lysosomal V1 subunit F [Source:MGI Symbol;Acc:MGI:1913394]	1.22944	7.65979	60.3659	7.87638e-15	1.45897e-13
ENSMUSG00000001313	11858	Rnd2	Rho family GTPase 2 [Source:MGI Symbol;Acc:MGI:1338755]	1.80862	6.61064	60.327	8.03394e-15	1.4865e-13
ENSMUSG00000025278	286940	Flnb	filamin, beta [Source:MGI Symbol;Acc:MGI:2446089]	-2.65723	4.15765	60.3229	8.05062e-15	1.48793e-13
ENSMUSG00000040721	239102	Zfhx2	zinc finger homeobox 2 [Source:MGI Symbol;Acc:MGI:2686934]	-1.33428	4.58952	60.2384	8.4036e-15	1.55145e-13
ENSMUSG00000073982	56212	Rhog	ras homolog family member G [Source:MGI Symbol;Acc:MGI:1928370]	-1.8855	4.37086	60.1859	8.63088e-15	1.59164e-13
ENSMUSG00000028634	16656	Hivep3	human immunodeficiency virus type I enhancer binding protein 3 [Source:MGI Symbol;Acc:MGI:106589]	-1.07455	6.24753	60.165	8.72316e-15	1.60688e-13
ENSMUSG00000048482	12064	Bdnf	brain derived neurotrophic factor [Source:MGI Symbol;Acc:MGI:88145]	-2.51317	6.33475	60.1598	8.74592e-15	1.60929e-13
ENSMUSG00000078681	68634	Tm2d3	TM2 domain containing 3 [Source:MGI Symbol;Acc:MGI:1915884]	1.24545	6.99679	60.1301	8.87899e-15	1.63197e-13
ENSMUSG00000048058	241576	Ldlrad3	low density lipoprotein receptor class A domain containing 3 [Source:MGI Symbol;Acc:MGI:2138856]	-2.15925	3.52237	60.0753	9.12967e-15	1.67619e-13
ENSMUSG00000055775	17885	Myh8	myosin, heavy polypeptide 8, skeletal muscle, perinatal [Source:MGI Symbol;Acc:MGI:1339712]	2.97678	0.421542	60.0109	9.43313e-15	1.73e-13
ENSMUSG00000031207	17698	Msn	moesin [Source:MGI Symbol;Acc:MGI:97167]	-2.02331	4.82516	59.9633	9.66429e-15	1.77044e-13
ENSMUSG00000025486	64384	Sirt3	sirtuin 3 [Source:MGI Symbol;Acc:MGI:1927665]	1.27712	7.44095	59.961	9.67566e-15	1.77057e-13
ENSMUSG00000011884	56356	Gltp	glycolipid transfer protein [Source:MGI Symbol;Acc:MGI:1929253]	-1.74644	5.22639	59.9499	9.73011e-15	1.77858e-13
ENSMUSG00000039105	66290	Atp6v1g1	ATPase, H+ transporting, lysosomal V1 subunit G1 [Source:MGI Symbol;Acc:MGI:1913540]	1.14561	5.67585	59.931	9.82411e-15	1.79379e-13
ENSMUSG00000027359	26458	Slc27a2	solute carrier family 27 (fatty acid transporter), member 2 [Source:MGI Symbol;Acc:MGI:1347099]	1.86736	3.17096	59.9003	9.97846e-15	1.81998e-13
ENSMUSG00000035000	13482	Dpp4	dipeptidylpeptidase 4 [Source:MGI Symbol;Acc:MGI:94919]	-2.85344	2.10545	59.8812	1.00757e-14	1.83571e-13
ENSMUSG00000038342	208104	Mlxip	MLX interacting protein [Source:MGI Symbol;Acc:MGI:2141183]	-1.34582	3.86592	59.8586	1.01924e-14	1.85493e-13
ENSMUSG00000026000	14768	Lancl1	LanC (bacterial lantibiotic synthetase component C)-like 1 [Source:MGI Symbol;Acc:MGI:1336997]	1.12974	7.47278	59.8507	1.02332e-14	1.86032e-13
ENSMUSG00000018509	73139	Cenpv	centromere protein V [Source:MGI Symbol;Acc:MGI:1920389]	1.14517	4.54848	59.7499	1.0771e-14	1.95594e-13
ENSMUSG00000049929	78134	Lpar4	lysophosphatidic acid receptor 4 [Source:MGI Symbol;Acc:MGI:1925384]	-3.03193	1.08975	59.6757	1.11848e-14	2.02887e-13
ENSMUSG00000044030	272359	Irf2bp1	interferon regulatory factor 2 binding protein 1 [Source:MGI Symbol;Acc:MGI:2442159]	1.78842	4.5807	59.6052	1.15927e-14	2.10057e-13
ENSMUSG00000037493	56506	Cib2	calcium and integrin binding family member 2 [Source:MGI Symbol;Acc:MGI:1929293]	1.58157	4.13455	59.5771	1.17596e-14	2.1285e-13
ENSMUSG00000007655	12389	Cav1	caveolin 1, caveolae protein [Source:MGI Symbol;Acc:MGI:102709]	-2.6827	3.7574	59.5742	1.17771e-14	2.12935e-13
ENSMUSG00000058260	71907	Serpina9	serine (or cysteine) peptidase inhibitor, clade A (alpha-1 antiproteinase, antitrypsin), member 9 [Source:MGI Symbol;Acc:MGI:1919157]	2.46785	2.83749	59.5032	1.22095e-14	2.20513e-13
ENSMUSG00000072694	NA	1500011B03Rik	RIKEN cDNA 1500011B03 gene [Source:MGI Symbol;Acc:MGI:1913486]	1.15942	6.65886	59.4895	1.22948e-14	2.21813e-13
ENSMUSG00000023905	27279	Tnfrsf12a	tumor necrosis factor receptor superfamily, member 12a [Source:MGI Symbol;Acc:MGI:1351484]	1.8757	3.23295	59.474	1.23923e-14	2.2333e-13
ENSMUSG00000022246	75646	Rai14	retinoic acid induced 14 [Source:MGI Symbol;Acc:MGI:1922896]	-3.08248	2.46281	59.4413	1.25995e-14	2.26819e-13
ENSMUSG00000023192	108068	Grm2	glutamate receptor, metabotropic 2 [Source:MGI Symbol;Acc:MGI:1351339]	-2.01395	5.53466	59.3859	1.29591e-14	2.3304e-13
ENSMUSG00000054428	11983	Atpif1	ATPase inhibitory factor 1 [Source:MGI Symbol;Acc:MGI:1196457]	1.67373	8.60238	59.344	1.32381e-14	2.37799e-13
ENSMUSG00000090069	NA	E430024P14Rik	RIKEN cDNA E430024P14 gene [Source:MGI Symbol;Acc:MGI:2445079]	1.85028	2.35955	59.3213	1.33917e-14	2.403e-13
ENSMUSG00000045312	218454	Lhfpl2	lipoma HMGIC fusion partner-like 2 [Source:MGI Symbol;Acc:MGI:2145236]	-1.89806	3.65356	59.2671	1.37658e-14	2.46747e-13
ENSMUSG00000053641	102442	Dennd4a	DENN/MADD domain containing 4A [Source:MGI Symbol;Acc:MGI:2142979]	-0.956632	5.29179	59.2548	1.38522e-14	2.48027e-13
ENSMUSG00000022304	64705	Dpys	dihydropyrimidinase [Source:MGI Symbol;Acc:MGI:1928679]	2.04275	0.967543	59.2108	1.41653e-14	2.53362e-13
ENSMUSG00000085980	NA	Gm12408	predicted gene 12408 [Source:MGI Symbol;Acc:MGI:3649921]	2.736	0.841388	59.2031	1.4221e-14	2.54084e-13
ENSMUSG00000027203	110074	Dut	deoxyuridine triphosphatase [Source:MGI Symbol;Acc:MGI:1346051]	1.26701	4.62791	59.1587	1.45457e-14	2.59606e-13
ENSMUSG00000059534	66152	Uqcr10	ubiquinol-cytochrome c reductase, complex III subunit X [Source:MGI Symbol;Acc:MGI:1913402]	1.75202	9.5112	59.1536	1.45829e-14	2.59992e-13
ENSMUSG00000064284	72355	Cdpf1	cysteine rich, DPF motif domain containing 1 [Source:MGI Symbol;Acc:MGI:1919605]	1.31498	3.87452	59.1044	1.49522e-14	2.6629e-13
ENSMUSG00000042043	21371	Tbca	tubulin cofactor A [Source:MGI Symbol;Acc:MGI:107549]	1.59336	5.99937	59.0039	1.57364e-14	2.79956e-13
ENSMUSG00000022309	11600	Angpt1	angiopoietin 1 [Source:MGI Symbol;Acc:MGI:108448]	-2.07463	2.81842	58.9951	1.58067e-14	2.80906e-13
ENSMUSG00000060038	330817	Dhps	deoxyhypusine synthase [Source:MGI Symbol;Acc:MGI:2683592]	1.01259	4.94156	58.9382	1.62704e-14	2.88839e-13
ENSMUSG00000005510	68349	Ndufs3	NADH dehydrogenase (ubiquinone) Fe-S protein 3 [Source:MGI Symbol;Acc:MGI:1915599]	1.05377	5.60408	58.8973	1.6612e-14	2.94588e-13
ENSMUSG00000054720	100604	Lrrc8c	leucine rich repeat containing 8 family, member C [Source:MGI Symbol;Acc:MGI:2140839]	-1.25785	5.06787	58.8662	1.68763e-14	2.98956e-13
ENSMUSG00000002767	27398	Mrpl2	mitochondrial ribosomal protein L2 [Source:MGI Symbol;Acc:MGI:1351622]	1.31832	4.26144	58.8554	1.69692e-14	3.00283e-13
ENSMUSG00000040767	78372	Snrnp25	small nuclear ribonucleoprotein 25 (U11/U12) [Source:MGI Symbol;Acc:MGI:1925622]	1.27415	4.48459	58.8441	1.70671e-14	3.0164e-13
ENSMUSG00000043366	170639	Olfr78	olfactory receptor 78 [Source:MGI Symbol;Acc:MGI:2157548]	-3.40938	0.562606	58.8424	1.70822e-14	3.0164e-13
ENSMUSG00000025815	209692	Dhtkd1	dehydrogenase E1 and transketolase domain containing 1 [Source:MGI Symbol;Acc:MGI:2445096]	-2.68561	3.07587	58.8049	1.74109e-14	3.07118e-13
ENSMUSG00000034898	70598	Filip1	filamin A interacting protein 1 [Source:MGI Symbol;Acc:MGI:1917848]	1.77505	3.2355	58.8021	1.74357e-14	3.07231e-13
ENSMUSG00000018899	16362	Irf1	interferon regulatory factor 1 [Source:MGI Symbol;Acc:MGI:96590]	-2.02459	1.69743	58.77	1.77226e-14	3.11955e-13
ENSMUSG00000029816	93695	Gpnmb	glycoprotein (transmembrane) nmb [Source:MGI Symbol;Acc:MGI:1934765]	2.08599	2.41983	58.7624	1.77908e-14	3.12825e-13
ENSMUSG00000039131	54120	Gipc2	GIPC PDZ domain containing family, member 2 [Source:MGI Symbol;Acc:MGI:1889209]	2.04109	2.06012	58.6694	1.86517e-14	3.27616e-13
ENSMUSG00000029712	83766	Actl6b	actin-like 6B [Source:MGI Symbol;Acc:MGI:1933548]	1.07124	5.50123	58.5838	1.94815e-14	3.4183e-13
ENSMUSG00000022864	67102	D16Ertd472e	DNA segment, Chr 16, ERATO Doi 472, expressed [Source:MGI Symbol;Acc:MGI:1196400]	-2.10154	2.2291	58.5708	1.96103e-14	3.43728e-13
ENSMUSG00000067719	NA	Gm10221	predicted gene 10221 [Source:MGI Symbol;Acc:MGI:3708709]	2.03586	1.68423	58.5663	1.96557e-14	3.44161e-13
ENSMUSG00000090061	319807	Nwd2	NACHT and WD repeat domain containing 2 [Source:MGI Symbol;Acc:MGI:1920464]	-2.05573	5.90319	58.5181	2.01424e-14	3.52313e-13
ENSMUSG00000039910	17684	Cited2	Cbp/p300-interacting transactivator, with Glu/Asp-rich carboxy-terminal domain, 2 [Source:MGI Symbol;Acc:MGI:1306784]	1.83856	5.75379	58.5125	2.02004e-14	3.52955e-13
ENSMUSG00000058624	14544	Gda	guanine deaminase [Source:MGI Symbol;Acc:MGI:95678]	-1.5492	7.01616	58.3954	2.14387e-14	3.73813e-13
ENSMUSG00000071226	330409	Cecr2	CECR2, histone acetyl-lysine reader [Source:MGI Symbol;Acc:MGI:1923799]	-2.30378	1.79499	58.3954	2.14391e-14	3.73813e-13
ENSMUSG00000004748	67900	Mtfp1	mitochondrial fission process 1 [Source:MGI Symbol;Acc:MGI:1916686]	1.12187	7.00631	58.3787	2.16214e-14	3.76597e-13
ENSMUSG00000022552	106025	Sharpin	SHANK-associated RH domain interacting protein [Source:MGI Symbol;Acc:MGI:1913331]	1.18272	4.85892	58.3624	2.18017e-14	3.7934e-13
ENSMUSG00000032802	76650	Srxn1	sulfiredoxin 1 homolog (S. cerevisiae) [Source:MGI Symbol;Acc:MGI:104971]	1.21312	6.43371	58.3572	2.18596e-14	3.7995e-13
ENSMUSG00000040048	68342	Ndufb10	NADH dehydrogenase (ubiquinone) 1 beta subcomplex, 10 [Source:MGI Symbol;Acc:MGI:1915592]	1.32028	8.28015	58.2973	2.25355e-14	3.9129e-13
ENSMUSG00000030772	50781	Dkk3	dickkopf WNT signaling pathway inhibitor 3 [Source:MGI Symbol;Acc:MGI:1354952]	-2.35101	7.80139	58.2814	2.27183e-14	3.94053e-13
ENSMUSG00000059355	414077	Wdr83os	WD repeat domain 83 opposite strand [Source:MGI Symbol;Acc:MGI:3041257]	1.08698	5.66039	58.2416	2.31824e-14	4.01684e-13
ENSMUSG00000066258	76681	Trim12a	tripartite motif-containing 12A [Source:MGI Symbol;Acc:MGI:1923931]	-3.00541	1.09789	58.2291	2.33303e-14	4.03825e-13
ENSMUSG00000071451	69666	Psmg4	proteasome (prosome, macropain) assembly chaperone 4 [Source:MGI Symbol;Acc:MGI:1916916]	1.7063	3.6966	58.1917	2.37778e-14	4.11144e-13
ENSMUSG00000050914	654824	Ankrd37	ankyrin repeat domain 37 [Source:MGI Symbol;Acc:MGI:3603344]	1.60118	3.209	58.1577	2.41925e-14	4.1788e-13
ENSMUSG00000074743	21824	Thbd	thrombomodulin [Source:MGI Symbol;Acc:MGI:98736]	-2.58313	3.94287	58.1171	2.4697e-14	4.26151e-13
ENSMUSG00000028964	57320	Park7	Parkinson disease (autosomal recessive, early onset) 7 [Source:MGI Symbol;Acc:MGI:2135637]	1.1416	8.00459	58.0612	2.54086e-14	4.37976e-13
ENSMUSG00000039385	12563	Cdh6	cadherin 6 [Source:MGI Symbol;Acc:MGI:107435]	-2.08473	3.46003	58.0497	2.55578e-14	4.40091e-13
ENSMUSG00000006494	228026	Pdk1	pyruvate dehydrogenase kinase, isoenzyme 1 [Source:MGI Symbol;Acc:MGI:1926119]	-1.29537	5.02011	58.0382	2.5708e-14	4.41913e-13
ENSMUSG00000025558	105445	Dock9	dedicator of cytokinesis 9 [Source:MGI Symbol;Acc:MGI:106321]	-1.32133	6.13106	58.0375	2.57167e-14	4.41913e-13
ENSMUSG00000033020	69833	Polr2f	polymerase (RNA) II (DNA directed) polypeptide F [Source:MGI Symbol;Acc:MGI:1349393]	1.29542	5.37347	58.0339	2.57638e-14	4.42265e-13
ENSMUSG00000002897	16172	Il17ra	interleukin 17 receptor A [Source:MGI Symbol;Acc:MGI:107399]	-2.07372	2.65828	58.0019	2.61868e-14	4.49063e-13
ENSMUSG00000000126	216795	Wnt9a	wingless-type MMTV integration site family, member 9A [Source:MGI Symbol;Acc:MGI:2446084]	-2.08864	2.73468	57.9948	2.62808e-14	4.50211e-13
ENSMUSG00000048562	320145	Sp8	trans-acting transcription factor 8 [Source:MGI Symbol;Acc:MGI:2443471]	1.84026	4.20735	57.9054	2.75031e-14	4.70349e-13
ENSMUSG00000043668	244579	Tox3	TOX high mobility group box family member 3 [Source:MGI Symbol;Acc:MGI:3039593]	1.28224	4.53434	57.9047	2.75129e-14	4.70349e-13
ENSMUSG00000029823	192196	Luc7l2	LUC7-like 2 (S. cerevisiae) [Source:MGI Symbol;Acc:MGI:2183260]	-1.50415	6.05152	57.9026	2.75421e-14	4.70364e-13
ENSMUSG00000043432	243813	Leng9	leukocyte receptor cluster (LRC) member 9 [Source:MGI Symbol;Acc:MGI:2444509]	1.24825	3.06226	57.8856	2.7781e-14	4.73958e-13
ENSMUSG00000042541	20422	Sem1	SEM1, 26S proteasome complex subunit [Source:MGI Symbol;Acc:MGI:109238]	1.5466	7.86841	57.8694	2.80109e-14	4.77391e-13
ENSMUSG00000028565	18027	Nfia	nuclear factor I/A [Source:MGI Symbol;Acc:MGI:108056]	-2.65347	8.72221	57.8534	2.82398e-14	4.808e-13
ENSMUSG00000036398	76497	Ppp1r11	protein phosphatase 1, regulatory (inhibitor) subunit 11 [Source:MGI Symbol;Acc:MGI:1923747]	1.31069	7.58454	57.8281	2.86049e-14	4.86518e-13
ENSMUSG00000021951	68043	Eef1akmt1	eukaryotic translation elongation factor 1 alpha lysine methyltransferase 1 [Source:MGI Symbol;Acc:MGI:1915293]	0.988604	6.3611	57.7587	2.96328e-14	5.03484e-13
ENSMUSG00000025986	227059	Slc39a10	solute carrier family 39 (zinc transporter), member 10 [Source:MGI Symbol;Acc:MGI:1914515]	-1.45899	7.8455	57.7529	2.97202e-14	5.04454e-13
ENSMUSG00000027583	72147	Zbtb46	zinc finger and BTB domain containing 46 [Source:MGI Symbol;Acc:MGI:1919397]	-1.69094	3.06199	57.7365	2.99692e-14	5.08163e-13
ENSMUSG00000031879	68523	Fam96b	family with sequence similarity 96, member B [Source:MGI Symbol;Acc:MGI:1915773]	1.36086	5.10572	57.7013	3.05099e-14	5.16804e-13
ENSMUSG00000024208	67267	Uqcc2	ubiquinol-cytochrome c reductase complex assembly factor 2 [Source:MGI Symbol;Acc:MGI:1914517]	1.50792	6.45036	57.6768	3.08924e-14	5.2275e-13
ENSMUSG00000019920	110829	Lims1	LIM and senescent cell antigen-like domains 1 [Source:MGI Symbol;Acc:MGI:1195263]	-1.44229	4.93693	57.642	3.14447e-14	5.31471e-13
ENSMUSG00000028527	11639	Ak4	adenylate kinase 4 [Source:MGI Symbol;Acc:MGI:87979]	-1.89144	4.73077	57.6403	3.14716e-14	5.31471e-13
ENSMUSG00000097375	NA	6720427I07Rik	RIKEN cDNA 6720427I07 gene [Source:MGI Symbol;Acc:MGI:1924398]	-3.95828	1.78632	57.5863	3.23465e-14	5.45692e-13
ENSMUSG00000028184	99633	Adgrl2	adhesion G protein-coupled receptor L2 [Source:MGI Symbol;Acc:MGI:2139714]	-1.28702	6.38873	57.5779	3.24858e-14	5.46981e-13
ENSMUSG00000091498	NA	Mpc1-ps	mitochondrial pyruvate carrier 1, pseudogene [Source:MGI Symbol;Acc:MGI:3781628]	1.18157	4.49453	57.5777	3.24887e-14	5.46981e-13
ENSMUSG00000032841	72446	Prr5l	proline rich 5 like [Source:MGI Symbol;Acc:MGI:1919696]	-2.56796	3.63604	57.5511	3.29313e-14	5.53803e-13
ENSMUSG00000028772	619605	Zcchc17	zinc finger, CCHC domain containing 17 [Source:MGI Symbol;Acc:MGI:1919955]	1.25573	7.89493	57.5493	3.29605e-14	5.53803e-13
ENSMUSG00000025958	12912	Creb1	cAMP responsive element binding protein 1 [Source:MGI Symbol;Acc:MGI:88494]	-0.95049	5.5565	57.5367	3.31724e-14	5.56802e-13
ENSMUSG00000040229	23890	Gpr34	G protein-coupled receptor 34 [Source:MGI Symbol;Acc:MGI:1346334]	-1.78522	4.22913	57.533	3.32353e-14	5.57294e-13
ENSMUSG00000015222	17756	Map2	microtubule-associated protein 2 [Source:MGI Symbol;Acc:MGI:97175]	-1.54126	9.47523	57.5275	3.33293e-14	5.58309e-13
ENSMUSG00000024193	21652	Phf1	PHD finger protein 1 [Source:MGI Symbol;Acc:MGI:98647]	1.74951	2.15799	57.5103	3.3621e-14	5.62627e-13
ENSMUSG00000018040	74778	Rrp7a	ribosomal RNA processing 7 homolog A (S. cerevisiae) [Source:MGI Symbol;Acc:MGI:1922028]	1.04149	4.21479	57.4928	3.39216e-14	5.67087e-13
ENSMUSG00000027401	21818	Tgm3	transglutaminase 3, E polypeptide [Source:MGI Symbol;Acc:MGI:98732]	-2.32465	0.926034	57.471	3.42994e-14	5.72827e-13
ENSMUSG00000019647	20358	Sema6a	sema domain, transmembrane domain (TM), and cytoplasmic domain, (semaphorin) 6A [Source:MGI Symbol;Acc:MGI:1203727]	-1.03075	5.63737	57.4279	3.50591e-14	5.84927e-13
ENSMUSG00000053317	66212	Sec61b	Sec61 beta subunit [Source:MGI Symbol;Acc:MGI:1913462]	1.56862	3.51562	57.404	3.54885e-14	5.91499e-13
ENSMUSG00000028413	14595	B4galt1	UDP-Gal:betaGlcNAc beta 1,4- galactosyltransferase, polypeptide 1 [Source:MGI Symbol;Acc:MGI:95705]	-2.47252	3.23909	57.402	3.55251e-14	5.91516e-13
ENSMUSG00000020720	66997	Psmd12	proteasome (prosome, macropain) 26S subunit, non-ATPase, 12 [Source:MGI Symbol;Acc:MGI:1914247]	1.07451	6.49509	57.3746	3.60238e-14	5.9922e-13
ENSMUSG00000025036	94279	Sfxn2	sideroflexin 2 [Source:MGI Symbol;Acc:MGI:2137678]	-2.0694	2.37542	57.3656	3.61878e-14	6.01347e-13
ENSMUSG00000033751	102060	Gadd45gip1	growth arrest and DNA-damage-inducible, gamma interacting protein 1 [Source:MGI Symbol;Acc:MGI:1914947]	1.51137	2.91995	57.3362	3.6733e-14	6.09798e-13
ENSMUSG00000047260	66048	Emc6	ER membrane protein complex subunit 6 [Source:MGI Symbol;Acc:MGI:1913298]	1.30839	5.08018	57.3308	3.68335e-14	6.10856e-13
ENSMUSG00000038291	102141	Snx25	sorting nexin 25 [Source:MGI Symbol;Acc:MGI:2142610]	1.11373	5.90707	57.2884	3.76376e-14	6.23569e-13
ENSMUSG00000016024	16803	Lbp	lipopolysaccharide binding protein [Source:MGI Symbol;Acc:MGI:1098776]	-2.89077	2.2163	57.2552	3.82771e-14	6.33533e-13
ENSMUSG00000028484	101739	Psip1	PC4 and SFRS1 interacting protein 1 [Source:MGI Symbol;Acc:MGI:2142116]	1.05503	7.6471	57.2338	3.86967e-14	6.39841e-13
ENSMUSG00000053580	77097	Tanc2	tetratricopeptide repeat, ankyrin repeat and coiled-coil containing 2 [Source:MGI Symbol;Acc:MGI:2444121]	-1.26765	7.74182	57.1768	3.98342e-14	6.57996e-13
ENSMUSG00000027004	20378	Frzb	frizzled-related protein [Source:MGI Symbol;Acc:MGI:892032]	-1.76554	5.13051	57.1356	4.06771e-14	6.70806e-13
ENSMUSG00000002578	22781	Ikzf4	IKAROS family zinc finger 4 [Source:MGI Symbol;Acc:MGI:1343139]	-1.21674	3.93767	57.135	4.06903e-14	6.70806e-13
ENSMUSG00000008348	22190	Ubc	ubiquitin C [Source:MGI Symbol;Acc:MGI:98889]	1.17719	8.27923	57.1176	4.10521e-14	6.76099e-13
ENSMUSG00000031950	93739	Gabarapl2	gamma-aminobutyric acid (GABA) A receptor-associated protein-like 2 [Source:MGI Symbol;Acc:MGI:1890602]	0.978463	5.26652	57.0542	4.23972e-14	6.97562e-13
ENSMUSG00000033543	235459	Gtf2a2	general transcription factor II A, 2 [Source:MGI Symbol;Acc:MGI:1933289]	1.37866	5.92206	57.0296	4.29301e-14	7.05155e-13
ENSMUSG00000063838	58804	1700027J19Rik	CDC42 effector protein (Rho GTPase binding) 5 [Source:MGI Symbol;Acc:MGI:1929745]	3.06134	0.343051	57.029	4.29435e-14	7.05155e-13
ENSMUSG00000026163	77629	Sphkap	SPHK1 interactor, AKAP domain containing [Source:MGI Symbol;Acc:MGI:1924879]	-1.46206	6.82109	56.9943	4.37069e-14	7.16696e-13
ENSMUSG00000027882	20912	Stxbp3	syntaxin binding protein 3 [Source:MGI Symbol;Acc:MGI:107362]	-1.81057	4.21145	56.9932	4.37325e-14	7.16696e-13
ENSMUSG00000002580	103742	Mien1	migration and invasion enhancer 1 [Source:MGI Symbol;Acc:MGI:1913678]	1.3416	6.46378	56.9797	4.40339e-14	7.20924e-13
ENSMUSG00000028455	66592	Stoml2	stomatin (Epb7.2)-like 2 [Source:MGI Symbol;Acc:MGI:1913842]	1.25061	5.25624	56.9702	4.42458e-14	7.23681e-13
ENSMUSG00000055567	329178	Unc80	unc-80, NALCN activator [Source:MGI Symbol;Acc:MGI:2652882]	-1.13541	7.3332	56.9387	4.49603e-14	7.34646e-13
ENSMUSG00000037710	52637	Cisd1	CDGSH iron sulfur domain 1 [Source:MGI Symbol;Acc:MGI:1261855]	1.30044	7.66179	56.9241	4.52959e-14	7.39404e-13
ENSMUSG00000028062	83409	Lamtor2	late endosomal/lysosomal adaptor, MAPK and MTOR activator 2 [Source:MGI Symbol;Acc:MGI:1932697]	1.35749	7.02271	56.9115	4.55873e-14	7.43431e-13
ENSMUSG00000031813	73711	Mvb12a	multivesicular body subunit 12A [Source:MGI Symbol;Acc:MGI:1920961]	1.3934	3.33332	56.882	4.62774e-14	7.53945e-13
ENSMUSG00000030036	57377	Mogs	mannosyl-oligosaccharide glucosidase [Source:MGI Symbol;Acc:MGI:1929872]	1.29493	4.3457	56.8424	4.72172e-14	7.68504e-13
ENSMUSG00000031820	68251	Babam1	BRISC and BRCA1 A complex member 1 [Source:MGI Symbol;Acc:MGI:1915501]	1.30245	5.21452	56.8221	4.77065e-14	7.75709e-13
ENSMUSG00000040298	330660	Btbd16	BTB (POZ) domain containing 16 [Source:MGI Symbol;Acc:MGI:3045247]	-2.48114	1.58992	56.7815	4.87027e-14	7.91134e-13
ENSMUSG00000015668	72621	Pdzd11	PDZ domain containing 11 [Source:MGI Symbol;Acc:MGI:1919871]	1.20396	6.23964	56.7309	4.99725e-14	8.10969e-13
ENSMUSG00000067336	12168	Bmpr2	bone morphogenetic protein receptor, type II (serine/threonine kinase) [Source:MGI Symbol;Acc:MGI:1095407]	-1.32909	7.4345	56.6835	5.11912e-14	8.29937e-13
ENSMUSG00000052305	15129	Hbb-bs	hemoglobin, beta adult s chain [Source:MGI Symbol;Acc:MGI:5474852]	-3.02731	6.10097	56.5864	5.37825e-14	8.71099e-13
ENSMUSG00000018168	22780	Ikzf3	IKAROS family zinc finger 3 [Source:MGI Symbol;Acc:MGI:1342542]	3.22884	0.996174	56.4545	5.75125e-14	9.30606e-13
ENSMUSG00000028399	19266	Ptprd	protein tyrosine phosphatase, receptor type, D [Source:MGI Symbol;Acc:MGI:97812]	-1.44555	8.61324	56.4215	5.84884e-14	9.45478e-13
ENSMUSG00000097466	NA	D430036J16Rik	RIKEN cDNA D430036J16 gene [Source:MGI Symbol;Acc:MGI:2441977]	1.73952	2.79686	56.4189	5.85654e-14	9.45803e-13
ENSMUSG00000027163	76501	Commd9	COMM domain containing 9 [Source:MGI Symbol;Acc:MGI:1923751]	0.997219	5.21403	56.412	5.87701e-14	9.48188e-13
ENSMUSG00000001700	107022	Gramd3	GRAM domain containing 3 [Source:MGI Symbol;Acc:MGI:1914815]	-2.34528	4.362	56.4093	5.88507e-14	9.48568e-13
ENSMUSG00000022788	224014	Fgd4	FYVE, RhoGEF and PH domain containing 4 [Source:MGI Symbol;Acc:MGI:2183747]	-1.88589	4.23114	56.3942	5.93049e-14	9.54964e-13
ENSMUSG00000031230	80903	Fgf16	fibroblast growth factor 16 [Source:MGI Symbol;Acc:MGI:1931627]	2.22542	0.438772	56.3554	6.04858e-14	9.73038e-13
ENSMUSG00000043496	66873	Tril	TLR4 interactor with leucine-rich repeats [Source:MGI Symbol;Acc:MGI:1914123]	-2.44116	4.95515	56.3318	6.12177e-14	9.8386e-13
ENSMUSG00000001445	107732	Mrpl10	mitochondrial ribosomal protein L10 [Source:MGI Symbol;Acc:MGI:1333801]	0.9357	5.32343	56.2543	6.36777e-14	1.0215e-12
ENSMUSG00000025035	56350	Arl3	ADP-ribosylation factor-like 3 [Source:MGI Symbol;Acc:MGI:1929699]	1.27812	7.08018	56.2542	6.36823e-14	1.0215e-12
ENSMUSG00000020246	67933	Hcfc2	host cell factor C2 [Source:MGI Symbol;Acc:MGI:1915183]	-1.00392	4.89168	56.2459	6.39507e-14	1.02481e-12
ENSMUSG00000029632	NA	Ndufa4	NADH dehydrogenase (ubiquinone) 1 alpha subcomplex, 4 [Source:MGI Symbol;Acc:MGI:107686]	1.7853	10.4814	56.213	6.50314e-14	1.04113e-12
ENSMUSG00000028393	17025	Alad	aminolevulinate, delta-, dehydratase [Source:MGI Symbol;Acc:MGI:96853]	1.12242	4.36423	56.2057	6.5273e-14	1.04399e-12
ENSMUSG00000039518	386463	Cdsn	corneodesmosin [Source:MGI Symbol;Acc:MGI:3505689]	-2.59829	0.611679	56.0518	7.05874e-14	1.12791e-12
ENSMUSG00000028452	269523	Vcp	valosin containing protein [Source:MGI Symbol;Acc:MGI:99919]	1.097	5.36416	56.0441	7.08636e-14	1.13123e-12
ENSMUSG00000016344	66496	Ppdpf	pancreatic progenitor cell differentiation and proliferation factor [Source:MGI Symbol;Acc:MGI:1913746]	1.52127	3.40299	56.0384	7.10707e-14	1.13345e-12
ENSMUSG00000026395	19264	Ptprc	protein tyrosine phosphatase, receptor type, C [Source:MGI Symbol;Acc:MGI:97810]	-2.82627	1.71173	56.0272	7.14741e-14	1.13879e-12
ENSMUSG00000054021	68346	Sirt5	sirtuin 5 [Source:MGI Symbol;Acc:MGI:1915596]	1.17964	3.60591	56.0061	7.22475e-14	1.15001e-12
ENSMUSG00000025141	68515	Myadml2	myeloid-associated differentiation marker-like 2 [Source:MGI Symbol;Acc:MGI:1915765]	1.77439	2.0138	55.9089	7.59079e-14	1.20712e-12
ENSMUSG00000031438	66889	Rnf128	ring finger protein 128 [Source:MGI Symbol;Acc:MGI:1914139]	1.15451	5.41341	55.8688	7.74733e-14	1.23084e-12
ENSMUSG00000026209	13437	Dnpep	aspartyl aminopeptidase [Source:MGI Symbol;Acc:MGI:1278328]	1.05235	5.64623	55.8557	7.79887e-14	1.23785e-12
ENSMUSG00000020475	56012	Pgam2	phosphoglycerate mutase 2 [Source:MGI Symbol;Acc:MGI:1933118]	1.39711	3.5209	55.8457	7.83898e-14	1.24303e-12
ENSMUSG00000026966	68475	Ssna1	SS nuclear autoantigen 1 [Source:MGI Symbol;Acc:MGI:1915725]	0.973931	5.85944	55.8389	7.86595e-14	1.24612e-12
ENSMUSG00000021811	108671	Dnajc9	DnaJ heat shock protein family (Hsp40) member C9 [Source:MGI Symbol;Acc:MGI:1915326]	1.3366	4.17901	55.8021	8.01444e-14	1.26843e-12
ENSMUSG00000073838	233870	Tufm	Tu translation elongation factor, mitochondrial [Source:MGI Symbol;Acc:MGI:1923686]	1.21071	3.92051	55.7852	8.08382e-14	1.2782e-12
ENSMUSG00000032239	55934	Rp9	retinitis pigmentosa 9 (human) [Source:MGI Symbol;Acc:MGI:2157166]	1.30236	4.39767	55.7515	8.22349e-14	1.29905e-12
ENSMUSG00000021476	56541	Habp4	hyaluronic acid binding protein 4 [Source:MGI Symbol;Acc:MGI:1891713]	1.26985	6.76866	55.744	8.25519e-14	1.30282e-12
ENSMUSG00000026315	20725	Serpinb8	serine (or cysteine) peptidase inhibitor, clade B, member 8 [Source:MGI Symbol;Acc:MGI:894657]	-3.28245	3.07462	55.7318	8.30622e-14	1.30963e-12
ENSMUSG00000038622	69790	Med30	mediator complex subunit 30 [Source:MGI Symbol;Acc:MGI:1917040]	1.44313	4.05137	55.7241	8.33918e-14	1.31358e-12
ENSMUSG00000026987	407823	Baz2b	bromodomain adjacent to zinc finger domain, 2B [Source:MGI Symbol;Acc:MGI:2442782]	-1.03555	4.91811	55.6903	8.48376e-14	1.33509e-12
ENSMUSG00000048368	27047	Omd	osteomodulin [Source:MGI Symbol;Acc:MGI:1350918]	-3.24045	0.932387	55.686	8.50202e-14	1.3367e-12
ENSMUSG00000032913	269473	Lrig2	leucine-rich repeats and immunoglobulin-like domains 2 [Source:MGI Symbol;Acc:MGI:2443718]	-1.93305	5.2652	55.6784	8.53515e-14	1.34064e-12
ENSMUSG00000040268	101476	Plekha1	pleckstrin homology domain containing, family A (phosphoinositide binding specific) member 1 [Source:MGI Symbol;Acc:MGI:2442213]	-0.934397	6.40528	55.6623	8.6052e-14	1.35037e-12
ENSMUSG00000061032	18114	Rrp1	ribosomal RNA processing 1 homolog (S. cerevisiae) [Source:MGI Symbol;Acc:MGI:1203500]	1.18362	7.32686	55.6595	8.61764e-14	1.35105e-12
ENSMUSG00000026478	226519	Lamc1	laminin, gamma 1 [Source:MGI Symbol;Acc:MGI:99914]	-1.57655	4.3444	55.6427	8.69156e-14	1.36135e-12
ENSMUSG00000035027	26396	Map2k2	mitogen-activated protein kinase kinase 2 [Source:MGI Symbol;Acc:MGI:1346867]	1.12794	4.78329	55.6384	8.71062e-14	1.36305e-12
ENSMUSG00000050953	14609	Gja1	gap junction protein, alpha 1 [Source:MGI Symbol;Acc:MGI:95713]	-3.17416	8.458	55.6162	8.80951e-14	1.37723e-12
ENSMUSG00000028563	94043	Tm2d1	TM2 domain containing 1 [Source:MGI Symbol;Acc:MGI:2137022]	1.2976	4.54454	55.6011	8.87759e-14	1.38657e-12
ENSMUSG00000068373	241589	D430041D05Rik	RIKEN cDNA D430041D05 gene [Source:MGI Symbol;Acc:MGI:2181743]	-1.51569	7.66637	55.5586	9.07157e-14	1.41554e-12
ENSMUSG00000003438	66525	Timm50	translocase of inner mitochondrial membrane 50 [Source:MGI Symbol;Acc:MGI:1913775]	1.09239	4.38368	55.5503	9.1096e-14	1.42014e-12
ENSMUSG00000022913	56088	Psmg1	proteasome (prosome, macropain) assembly chaperone 1 [Source:MGI Symbol;Acc:MGI:1860263]	1.22203	3.47901	55.5386	9.16417e-14	1.42731e-12
ENSMUSG00000096780	NA	Tmem181b-ps	transmembrane protein 181B, pseudogene [Source:MGI Symbol;Acc:MGI:3779544]	-3.04406	3.04657	55.4937	9.37605e-14	1.45894e-12
ENSMUSG00000026031	12633	Cflar	CASP8 and FADD-like apoptosis regulator [Source:MGI Symbol;Acc:MGI:1336166]	-1.79666	4.41996	55.4846	9.41918e-14	1.46429e-12
ENSMUSG00000049086	107771	Bmyc	brain expressed myelocytomatosis oncogene [Source:MGI Symbol;Acc:MGI:88184]	1.68713	4.1863	55.4737	9.4719e-14	1.47111e-12
ENSMUSG00000008036	232910	Ap2s1	adaptor-related protein complex 2, sigma 1 subunit [Source:MGI Symbol;Acc:MGI:2141861]	1.20732	5.37859	55.4695	9.49181e-14	1.47282e-12
ENSMUSG00000027852	18176	Nras	neuroblastoma ras oncogene [Source:MGI Symbol;Acc:MGI:97376]	-1.60217	8.16545	55.4492	9.59073e-14	1.48679e-12
ENSMUSG00000009418	215690	Nav1	neuron navigator 1 [Source:MGI Symbol;Acc:MGI:2183683]	-1.27895	7.78048	55.42	9.73398e-14	1.50759e-12
ENSMUSG00000096883	435145	Shisa8	shisa family member 8 [Source:MGI Symbol;Acc:MGI:2146080]	2.50074	0.789009	55.3977	9.84539e-14	1.52343e-12
ENSMUSG00000022428	73739	Cby1	chibby family member 1, beta catenin antagonist [Source:MGI Symbol;Acc:MGI:1920989]	1.15992	4.63227	55.3811	9.92852e-14	1.53486e-12
ENSMUSG00000058443	434434	Rpl10-ps3	ribosomal protein L10, pseudogene 3 [Source:MGI Symbol;Acc:MGI:3704336]	1.83589	0.971007	55.3754	9.95726e-14	1.53787e-12
ENSMUSG00000047881	100532	Rell1	RELT-like 1 [Source:MGI Symbol;Acc:MGI:2140767]	-1.51299	4.76267	55.3709	9.98035e-14	1.54001e-12
ENSMUSG00000029126	18196	Nsg1	neuron specific gene family member 1 [Source:MGI Symbol;Acc:MGI:109149]	1.49116	7.8337	55.3559	1.00568e-13	1.55037e-12
ENSMUSG00000026421	13007	Csrp1	cysteine and glycine-rich protein 1 [Source:MGI Symbol;Acc:MGI:88549]	-2.36886	5.80925	55.3125	1.02813e-13	1.58351e-12
ENSMUSG00000039515	110854	Ptpa	protein phosphatase 2 protein activator [Source:MGI Symbol;Acc:MGI:1346006]	1.10062	7.54346	55.2579	1.05709e-13	1.62661e-12
ENSMUSG00000039270	230316	Megf9	multiple EGF-like-domains 9 [Source:MGI Symbol;Acc:MGI:1918264]	-1.23195	7.18918	55.2074	1.08457e-13	1.66736e-12
ENSMUSG00000049928	93896	Glp2r	glucagon-like peptide 2 receptor [Source:MGI Symbol;Acc:MGI:2136733]	-2.46845	1.7398	55.198	1.08981e-13	1.67285e-12
ENSMUSG00000004328	53417	Hif3a	hypoxia inducible factor 3, alpha subunit [Source:MGI Symbol;Acc:MGI:1859778]	-3.72815	1.20806	55.1974	1.09016e-13	1.67285e-12
ENSMUSG00000033306	210126	Lpp	LIM domain containing preferred translocation partner in lipoma [Source:MGI Symbol;Acc:MGI:2441849]	-2.47315	4.26552	55.1929	1.09264e-13	1.67488e-12
ENSMUSG00000059208	76936	Hnrnpm	heterogeneous nuclear ribonucleoprotein M [Source:MGI Symbol;Acc:MGI:1926465]	1.08018	5.46895	55.1913	1.0935e-13	1.67488e-12
ENSMUSG00000031381	18700	Piga	phosphatidylinositol glycan anchor biosynthesis, class A [Source:MGI Symbol;Acc:MGI:99461]	-1.50805	2.96995	55.1543	1.11428e-13	1.70514e-12
ENSMUSG00000049001	68169	Ndnf	neuron-derived neurotrophic factor [Source:MGI Symbol;Acc:MGI:1915419]	1.72831	3.59335	55.1494	1.11706e-13	1.70783e-12
ENSMUSG00000028555	230603	Ttc39a	tetratricopeptide repeat domain 39A [Source:MGI Symbol;Acc:MGI:2444350]	1.93592	1.82963	55.1192	1.13438e-13	1.73272e-12
ENSMUSG00000078771	14017	Evi2a	ecotropic viral integration site 2a [Source:MGI Symbol;Acc:MGI:95458]	-2.00595	5.68848	55.0771	1.15895e-13	1.76862e-12
ENSMUSG00000007950	64296	Abhd8	abhydrolase domain containing 8 [Source:MGI Symbol;Acc:MGI:1918946]	1.33568	5.19899	55.0707	1.16271e-13	1.77273e-12
ENSMUSG00000094500	72632	Smim18	small integral membrane protein 18 [Source:MGI Symbol;Acc:MGI:1919882]	1.37776	5.35401	55.0604	1.1688e-13	1.78039e-12
ENSMUSG00000022672	19090	Prkdc	protein kinase, DNA activated, catalytic polypeptide [Source:MGI Symbol;Acc:MGI:104779]	-1.29212	4.01978	55.0475	1.17654e-13	1.79054e-12
ENSMUSG00000039163	67899	Cmc1	COX assembly mitochondrial protein 1 [Source:MGI Symbol;Acc:MGI:1915149]	1.35346	4.48843	54.8902	1.27454e-13	1.93791e-12
ENSMUSG00000019852	215821	Arfgef3	ARFGEF family member 3 [Source:MGI Symbol;Acc:MGI:106387]	-1.4157	5.40497	54.8708	1.28717e-13	1.95532e-12
ENSMUSG00000051355	17846	Commd1	COMM domain containing 1 [Source:MGI Symbol;Acc:MGI:109474]	1.33002	4.54811	54.8559	1.29698e-13	1.96843e-12
ENSMUSG00000046546	224093	Fam43a	family with sequence similarity 43, member A [Source:MGI Symbol;Acc:MGI:2676309]	1.72857	2.48541	54.7205	1.38947e-13	2.10687e-12
ENSMUSG00000069919	15122	Hba-a1	hemoglobin alpha, adult chain 1 [Source:MGI Symbol;Acc:MGI:96015]	-2.48757	4.58608	54.7142	1.39393e-13	2.11171e-12
ENSMUSG00000044164	328234	Rnf182	ring finger protein 182 [Source:MGI Symbol;Acc:MGI:3045355]	-1.3923	4.59485	54.7091	1.3976e-13	2.11535e-12
ENSMUSG00000017400	217154	Stac2	SH3 and cysteine rich domain 2 [Source:MGI Symbol;Acc:MGI:2144518]	1.44603	5.39456	54.697	1.40621e-13	2.12645e-12
ENSMUSG00000048758	19944	Rpl29	ribosomal protein L29 [Source:MGI Symbol;Acc:MGI:99687]	1.34053	4.27456	54.6487	1.44123e-13	2.17742e-12
ENSMUSG00000053768	66075	Chchd3	coiled-coil-helix-coiled-coil-helix domain containing 3 [Source:MGI Symbol;Acc:MGI:1913325]	1.17746	6.23282	54.6101	1.46982e-13	2.2186e-12
ENSMUSG00000027188	210622	Pamr1	peptidase domain containing associated with muscle regeneration 1 [Source:MGI Symbol;Acc:MGI:2445082]	-2.39789	5.68034	54.5837	1.48969e-13	2.24655e-12
ENSMUSG00000021743	54713	Fezf2	Fez family zinc finger 2 [Source:MGI Symbol;Acc:MGI:1859823]	-2.18155	4.30106	54.5796	1.49279e-13	2.2492e-12
ENSMUSG00000037999	212285	Arap2	ArfGAP with RhoGAP domain, ankyrin repeat and PH domain 2 [Source:MGI Symbol;Acc:MGI:2684416]	-1.17763	6.28982	54.5399	1.52327e-13	2.29304e-12
ENSMUSG00000063694	13063	Cycs	cytochrome c, somatic [Source:MGI Symbol;Acc:MGI:88578]	1.26594	4.84116	54.4955	1.55801e-13	2.34322e-12
ENSMUSG00000066839	26940	Ecsit	ECSIT signalling integrator [Source:MGI Symbol;Acc:MGI:1349469]	0.923213	5.54315	54.4668	1.58093e-13	2.37479e-12
ENSMUSG00000017221	22123	Psmd3	proteasome (prosome, macropain) 26S subunit, non-ATPase, 3 [Source:MGI Symbol;Acc:MGI:98858]	1.07782	4.69355	54.4657	1.58186e-13	2.37479e-12
ENSMUSG00000035891	223753	Cerk	ceramide kinase [Source:MGI Symbol;Acc:MGI:2386052]	1.33556	4.97628	54.4532	1.59192e-13	2.38773e-12
ENSMUSG00000023089	68202	Ndufa5	NADH dehydrogenase (ubiquinone) 1 alpha subcomplex, 5 [Source:MGI Symbol;Acc:MGI:1915452]	1.755	8.72716	54.4384	1.604e-13	2.40369e-12
ENSMUSG00000086567	NA	Gm2830	predicted gene 2830 [Source:MGI Symbol;Acc:MGI:3781002]	2.10835	3.19864	54.4315	1.60959e-13	2.4099e-12
ENSMUSG00000030103	20893	Bhlhe40	basic helix-loop-helix family, member e40 [Source:MGI Symbol;Acc:MGI:1097714]	-1.402	6.09004	54.4286	1.612e-13	2.41133e-12
ENSMUSG00000052387	226025	Trpm3	transient receptor potential cation channel, subfamily M, member 3 [Source:MGI Symbol;Acc:MGI:2443101]	-1.87397	3.76213	54.3813	1.65125e-13	2.46783e-12
ENSMUSG00000027562	12349	Car2	carbonic anhydrase 2 [Source:MGI Symbol;Acc:MGI:88269]	-2.03912	8.46596	54.3359	1.6899e-13	2.52332e-12
ENSMUSG00000022956	28080	Atp5o	ATP synthase, H+ transporting, mitochondrial F1 complex, O subunit [Source:MGI Symbol;Acc:MGI:106341]	1.47962	9.15442	54.3079	1.71415e-13	2.55723e-12
ENSMUSG00000042712	22381	Tceal9	transcription elongation factor A like 9 [Source:MGI Symbol;Acc:MGI:109567]	1.21154	6.89788	54.2689	1.74851e-13	2.60615e-12
ENSMUSG00000079242	NA	C730034F03Rik	RIKEN cDNA C730034F03 gene [Source:MGI Symbol;Acc:MGI:2441921]	-2.54708	1.12896	54.2549	1.76097e-13	2.62186e-12
ENSMUSG00000020635	14226	Fkbp1b	FK506 binding protein 1b [Source:MGI Symbol;Acc:MGI:1336205]	1.38429	5.29953	54.2535	1.7622e-13	2.62186e-12
ENSMUSG00000045083	242384	Lingo2	leucine rich repeat and Ig domain containing 2 [Source:MGI Symbol;Acc:MGI:2442298]	-1.37705	5.91751	54.2254	1.78758e-13	2.65725e-12
ENSMUSG00000036764	30045	Dnajc12	DnaJ heat shock protein family (Hsp40) member C12 [Source:MGI Symbol;Acc:MGI:1353428]	1.53687	4.32954	54.1623	1.84597e-13	2.74159e-12
ENSMUSG00000005882	56046	Uqcc1	ubiquinol-cytochrome c reductase complex assembly factor 1 [Source:MGI Symbol;Acc:MGI:1929472]	0.966171	5.13366	54.1308	1.87573e-13	2.78331e-12
ENSMUSG00000046834	16678	Krt1	keratin 1 [Source:MGI Symbol;Acc:MGI:96698]	2.40692	1.82266	54.1194	1.88666e-13	2.79704e-12
ENSMUSG00000000568	11991	Hnrnpd	heterogeneous nuclear ribonucleoprotein D [Source:MGI Symbol;Acc:MGI:101947]	1.11131	6.32588	54.1129	1.89293e-13	2.80382e-12
ENSMUSG00000032615	103850	Nt5m	5',3'-nucleotidase, mitochondrial [Source:MGI Symbol;Acc:MGI:1917127]	1.20107	5.66579	54.1027	1.90275e-13	2.81587e-12
ENSMUSG00000033308	99586	Dpyd	dihydropyrimidine dehydrogenase [Source:MGI Symbol;Acc:MGI:2139667]	-2.17909	1.62438	54.0566	1.94799e-13	2.88025e-12
ENSMUSG00000020709	216991	Adap2	ArfGAP with dual PH domains 2 [Source:MGI Symbol;Acc:MGI:2663075]	-2.56854	2.25335	53.9949	2.01015e-13	2.96952e-12
ENSMUSG00000021037	217737	Ahsa1	AHA1, activator of heat shock protein ATPase 1 [Source:MGI Symbol;Acc:MGI:2387603]	1.04297	6.66236	53.9867	2.01853e-13	2.97926e-12
ENSMUSG00000043168	NA	4930426D05Rik	RIKEN cDNA 4930426D05 gene [Source:MGI Symbol;Acc:MGI:1921894]	2.76166	-0.405917	53.9768	2.02875e-13	2.99168e-12
ENSMUSG00000038122	544696	Tbc1d32	TBC1 domain family, member 32 [Source:MGI Symbol;Acc:MGI:2442827]	-1.34713	3.26802	53.9537	2.05271e-13	3.02433e-12
ENSMUSG00000043940	72145	Wdfy3	WD repeat and FYVE domain containing 3 [Source:MGI Symbol;Acc:MGI:1096875]	-1.2792	6.97974	53.9508	2.05574e-13	3.02612e-12
ENSMUSG00000074247	66498	Dda1	DET1 and DDB1 associated 1 [Source:MGI Symbol;Acc:MGI:1913748]	1.25467	5.02807	53.9214	2.08677e-13	3.06908e-12
ENSMUSG00000019362	101966	D8Ertd738e	DNA segment, Chr 8, ERATO Doi 738, expressed [Source:MGI Symbol;Acc:MGI:1289231]	1.38986	6.67854	53.8669	2.14547e-13	3.15263e-12
ENSMUSG00000026782	329165	Abi2	abl-interactor 2 [Source:MGI Symbol;Acc:MGI:106913]	-1.11449	8.04702	53.8508	2.16302e-13	3.17561e-12
ENSMUSG00000045534	16493	Kcna5	potassium voltage-gated channel, shaker-related subfamily, member 5 [Source:MGI Symbol;Acc:MGI:96662]	2.14751	2.48216	53.8437	2.17091e-13	3.18438e-12
ENSMUSG00000026179	56695	Pnkd	paroxysmal nonkinesiogenic dyskinesia [Source:MGI Symbol;Acc:MGI:1930773]	0.985249	7.12376	53.8272	2.18919e-13	3.20837e-12
ENSMUSG00000002413	109880	Braf	Braf transforming gene [Source:MGI Symbol;Acc:MGI:88190]	-1.44749	6.97935	53.7744	2.24885e-13	3.29291e-12
ENSMUSG00000014402	22088	Tsg101	tumor susceptibility gene 101 [Source:MGI Symbol;Acc:MGI:106581]	0.941625	5.90706	53.7614	2.26378e-13	3.31185e-12
ENSMUSG00000051504	233274	Siglech	sialic acid binding Ig-like lectin H [Source:MGI Symbol;Acc:MGI:2443256]	-1.87262	5.0502	53.7233	2.30815e-13	3.37379e-12
ENSMUSG00000057766	225187	Ankrd29	ankyrin repeat domain 29 [Source:MGI Symbol;Acc:MGI:2687055]	1.47446	5.95619	53.7196	2.31244e-13	3.37709e-12
ENSMUSG00000043510	100900	Hscb	HscB iron-sulfur cluster co-chaperone [Source:MGI Symbol;Acc:MGI:2141135]	1.31031	3.10223	53.6922	2.34488e-13	3.42147e-12
ENSMUSG00000032330	12866	Cox7a2	cytochrome c oxidase subunit VIIa 2 [Source:MGI Symbol;Acc:MGI:1316715]	1.70248	9.63338	53.663	2.38e-13	3.46967e-12
ENSMUSG00000040850	103554	Psme4	proteasome (prosome, macropain) activator subunit 4 [Source:MGI Symbol;Acc:MGI:2143994]	-1.16133	5.7117	53.6593	2.38454e-13	3.47324e-12
ENSMUSG00000001998	108011	Ap4e1	adaptor-related protein complex AP-4, epsilon 1 [Source:MGI Symbol;Acc:MGI:1336993]	-2.00506	2.36983	53.6542	2.39074e-13	3.47923e-12
ENSMUSG00000000567	20682	Sox9	SRY (sex determining region Y)-box 9 [Source:MGI Symbol;Acc:MGI:98371]	-2.33444	5.59142	53.6403	2.4077e-13	3.50085e-12
ENSMUSG00000028789	242669	Azin2	antizyme inhibitor 2 [Source:MGI Symbol;Acc:MGI:2442093]	1.21061	4.23652	53.6078	2.44784e-13	3.5561e-12
ENSMUSG00000051695	23983	Pcbp1	poly(rC) binding protein 1 [Source:MGI Symbol;Acc:MGI:1345635]	1.36942	6.79743	53.5904	2.46959e-13	3.58457e-12
ENSMUSG00000039328	68867	Rnf122	ring finger protein 122 [Source:MGI Symbol;Acc:MGI:1916117]	-1.65336	4.13968	53.5793	2.4836e-13	3.60175e-12
ENSMUSG00000031370	22184	Zrsr2	zinc finger (CCCH type), RNA binding motif and serine/arginine rich 2 [Source:MGI Symbol;Acc:MGI:103287]	1.09158	5.65349	53.5674	2.49872e-13	3.62053e-12
ENSMUSG00000040254	108151	Sema3d	sema domain, immunoglobulin domain (Ig), short basic domain, secreted, (semaphorin) 3D [Source:MGI Symbol;Acc:MGI:1860118]	-1.9417	3.20277	53.5623	2.50524e-13	3.62682e-12
ENSMUSG00000052155	11480	Acvr2a	activin receptor IIA [Source:MGI Symbol;Acc:MGI:102806]	-1.34364	5.28202	53.5575	2.51132e-13	3.63247e-12
ENSMUSG00000019494	26893	Cops6	COP9 signalosome subunit 6 [Source:MGI Symbol;Acc:MGI:1349439]	1.07299	7.2114	53.4884	2.6012e-13	3.7592e-12
ENSMUSG00000022401	321003	Xpnpep3	X-prolyl aminopeptidase 3, mitochondrial [Source:MGI Symbol;Acc:MGI:2445217]	-1.23569	4.12845	53.4758	2.61793e-13	3.78009e-12
ENSMUSG00000027274	59030	Mkks	McKusick-Kaufman syndrome [Source:MGI Symbol;Acc:MGI:1891836]	1.15858	6.92175	53.395	2.72791e-13	3.93548e-12
ENSMUSG00000029994	11746	Anxa4	annexin A4 [Source:MGI Symbol;Acc:MGI:88030]	-1.75725	2.73665	53.3789	2.75034e-13	3.9644e-12
ENSMUSG00000046442	320472	Ppm1e	protein phosphatase 1E (PP2C domain containing) [Source:MGI Symbol;Acc:MGI:2444096]	-1.21965	6.74541	53.3757	2.75489e-13	3.96751e-12
ENSMUSG00000060510	77519	Zfp266	zinc finger protein 266 [Source:MGI Symbol;Acc:MGI:1924769]	-1.51829	5.81055	53.3694	2.76375e-13	3.97683e-12
ENSMUSG00000038371	319934	Sbf2	SET binding factor 2 [Source:MGI Symbol;Acc:MGI:1921831]	-1.12612	4.75496	53.3258	2.82567e-13	4.06242e-12
ENSMUSG00000038954	109115	Supt3	suppressor of Ty 3 [Source:MGI Symbol;Acc:MGI:1923723]	1.26369	3.48006	53.3141	2.8426e-13	4.08323e-12
ENSMUSG00000030983	66165	Bccip	BRCA2 and CDKN1A interacting protein [Source:MGI Symbol;Acc:MGI:1913415]	0.968943	5.85657	53.2857	2.88401e-13	4.13915e-12
ENSMUSG00000045007	103768	Tubg2	tubulin, gamma 2 [Source:MGI Symbol;Acc:MGI:2144208]	0.911205	5.07652	53.2626	2.91816e-13	4.18455e-12
ENSMUSG00000022548	11815	Apod	apolipoprotein D [Source:MGI Symbol;Acc:MGI:88056]	-2.17715	7.28415	53.2406	2.95093e-13	4.22595e-12
ENSMUSG00000020955	11782	Ap4s1	adaptor-related protein complex AP-4, sigma 1 [Source:MGI Symbol;Acc:MGI:1337065]	1.42451	5.20053	53.2398	2.95212e-13	4.22595e-12
ENSMUSG00000018585	11927	Atox1	antioxidant 1 copper chaperone [Source:MGI Symbol;Acc:MGI:1333855]	1.38165	7.55766	53.2194	2.98299e-13	4.26647e-12
ENSMUSG00000041124	78100	Msantd4	Myb/SANT-like DNA-binding domain containing 4 with coiled-coils [Source:MGI Symbol;Acc:MGI:1925350]	0.992385	6.33681	53.1727	3.0548e-13	4.36542e-12
ENSMUSG00000052033	109054	Pfdn4	prefoldin 4 [Source:MGI Symbol;Acc:MGI:1923512]	1.39004	5.68178	53.1507	3.08915e-13	4.41072e-12
ENSMUSG00000014496	105522	Ankrd28	ankyrin repeat domain 28 [Source:MGI Symbol;Acc:MGI:2145661]	-1.37632	4.26309	53.0692	3.21994e-13	4.59352e-12
ENSMUSG00000026519	208795	Tmem63a	transmembrane protein 63a [Source:MGI Symbol;Acc:MGI:2384789]	-2.84634	3.8826	53.0672	3.22322e-13	4.59426e-12
ENSMUSG00000040651	218850	Fam208a	family with sequence similarity 208, member A [Source:MGI Symbol;Acc:MGI:1921694]	-1.5362	4.80915	53.0518	3.24861e-13	4.62649e-12
ENSMUSG00000056211	226412	R3hdm1	R3H domain containing 1 [Source:MGI Symbol;Acc:MGI:2448514]	-1.83828	8.09132	53.0427	3.26371e-13	4.64401e-12
ENSMUSG00000021969	75965	Zdhhc20	zinc finger, DHHC domain containing 20 [Source:MGI Symbol;Acc:MGI:1923215]	-1.19698	5.82781	52.985	3.36098e-13	4.77834e-12
ENSMUSG00000075478	76965	Slitrk1	SLIT and NTRK-like family, member 1 [Source:MGI Symbol;Acc:MGI:2679446]	-1.48898	5.88762	52.9785	3.37223e-13	4.79024e-12
ENSMUSG00000048154	381022	Kmt2d	lysine (K)-specific methyltransferase 2D [Source:MGI Symbol;Acc:MGI:2682319]	-2.0142	7.10932	52.9596	3.40475e-13	4.83231e-12
ENSMUSG00000028334	94181	Nans	N-acetylneuraminic acid synthase (sialic acid synthase) [Source:MGI Symbol;Acc:MGI:2149820]	1.23018	2.86008	52.9523	3.41743e-13	4.84616e-12
ENSMUSG00000101335	NA	Gm28229	predicted gene 28229 [Source:MGI Symbol;Acc:MGI:5578935]	-2.94964	0.852045	52.9432	3.43329e-13	4.86043e-12
ENSMUSG00000069917	110257	Hba-a2	hemoglobin alpha, adult chain 2 [Source:MGI Symbol;Acc:MGI:96016]	-2.46857	4.12778	52.9432	3.43333e-13	4.86043e-12
ENSMUSG00000086782	NA	E130102H24Rik	RIKEN cDNA E130102H24 gene [Source:MGI Symbol;Acc:MGI:1925116]	-2.76977	1.20552	52.898	3.51321e-13	4.96928e-12
ENSMUSG00000061132	17060	Blnk	B cell linker [Source:MGI Symbol;Acc:MGI:96878]	-2.0992	3.06401	52.8615	3.57909e-13	5.05816e-12
ENSMUSG00000034023	211651	Fancd2	Fanconi anemia, complementation group D2 [Source:MGI Symbol;Acc:MGI:2448480]	-1.79294	2.77046	52.8242	3.64785e-13	5.15097e-12
ENSMUSG00000031533	57312	Mrps31	mitochondrial ribosomal protein S31 [Source:MGI Symbol;Acc:MGI:1913153]	1.05479	4.8076	52.7837	3.72375e-13	5.25368e-12
ENSMUSG00000024085	17158	Man2a1	mannosidase 2, alpha 1 [Source:MGI Symbol;Acc:MGI:104669]	-1.42228	3.59744	52.7662	3.7571e-13	5.29624e-12
ENSMUSG00000008318	320100	Relt	RELT tumor necrosis factor receptor [Source:MGI Symbol;Acc:MGI:2443373]	1.49771	3.05906	52.7637	3.76192e-13	5.29854e-12
ENSMUSG00000049760	224904	2410015M20Rik	RIKEN cDNA 2410015M20 gene [Source:MGI Symbol;Acc:MGI:2442174]	1.41703	6.98981	52.7577	3.77333e-13	5.31012e-12
ENSMUSG00000033777	279572	Tlr13	toll-like receptor 13 [Source:MGI Symbol;Acc:MGI:3045213]	-2.70737	0.729582	52.7295	3.82803e-13	5.38254e-12
ENSMUSG00000028779	67898	Pef1	penta-EF hand domain containing 1 [Source:MGI Symbol;Acc:MGI:1915148]	1.05874	6.07319	52.7266	3.83368e-13	5.38593e-12
ENSMUSG00000027305	69702	Ndufaf1	NADH dehydrogenase (ubiquinone) 1 alpha subcomplex, assembly factor 1 [Source:MGI Symbol;Acc:MGI:1916952]	1.0289	5.21973	52.6905	3.90481e-13	5.48123e-12
ENSMUSG00000028655	76574	Mfsd2a	major facilitator superfamily domain containing 2A [Source:MGI Symbol;Acc:MGI:1923824]	-2.26503	5.03763	52.6853	3.91506e-13	5.49099e-12
ENSMUSG00000027076	30059	Timm10	translocase of inner mitochondrial membrane 10 [Source:MGI Symbol;Acc:MGI:1353429]	1.26468	6.00514	52.6824	3.92081e-13	5.49443e-12
ENSMUSG00000030737	101488	Slco2b1	solute carrier organic anion transporter family, member 2b1 [Source:MGI Symbol;Acc:MGI:1351872]	-1.91784	3.86348	52.6771	3.93153e-13	5.50481e-12
ENSMUSG00000036537	69942	Rnf113a1	ring finger protein 113A1 [Source:MGI Symbol;Acc:MGI:1917192]	1.31756	3.21142	52.6404	4.00569e-13	5.60392e-12
ENSMUSG00000036873	66421	2410004B18Rik	RIKEN cDNA 2410004B18 gene [Source:MGI Symbol;Acc:MGI:1913671]	1.14224	4.70787	52.6247	4.03787e-13	5.6442e-12
ENSMUSG00000049420	77220	Tmem200a	transmembrane protein 200A [Source:MGI Symbol;Acc:MGI:1924470]	-1.32988	4.41267	52.6077	4.07292e-13	5.68841e-12
ENSMUSG00000000078	23849	Klf6	Kruppel-like factor 6 [Source:MGI Symbol;Acc:MGI:1346318]	-1.0013	5.38873	52.6046	4.07928e-13	5.69251e-12
ENSMUSG00000024914	66556	Drap1	Dr1 associated protein 1 (negative cofactor 2 alpha) [Source:MGI Symbol;Acc:MGI:1913806]	1.52534	5.27537	52.5928	4.1039e-13	5.72207e-12
ENSMUSG00000097974	NA	Gm10605	predicted gene 10605 [Source:MGI Symbol;Acc:MGI:3642596]	1.84469	1.85466	52.5787	4.13356e-13	5.75859e-12
ENSMUSG00000024426	73242	Atat1	alpha tubulin acetyltransferase 1 [Source:MGI Symbol;Acc:MGI:1913869]	1.1834	5.89699	52.5637	4.16515e-13	5.79775e-12
ENSMUSG00000050505	219257	Pcdh20	protocadherin 20 [Source:MGI Symbol;Acc:MGI:2443376]	-1.20785	5.23024	52.5395	4.21689e-13	5.86487e-12
ENSMUSG00000039568	207740	Ubald1	UBA-like domain containing 1 [Source:MGI Symbol;Acc:MGI:1916255]	1.3443	5.43018	52.53	4.2372e-13	5.88818e-12
ENSMUSG00000026270	23830	Capn10	calpain 10 [Source:MGI Symbol;Acc:MGI:1344392]	1.17204	4.3386	52.5205	4.25784e-13	5.91192e-12
ENSMUSG00000032259	13489	Drd2	dopamine receptor D2 [Source:MGI Symbol;Acc:MGI:94924]	2.42725	3.50258	52.4067	4.51171e-13	6.2592e-12
ENSMUSG00000022604	74201	Cep97	centrosomal protein 97 [Source:MGI Symbol;Acc:MGI:1921451]	-1.02103	3.94525	52.4015	4.52371e-13	6.27062e-12
ENSMUSG00000085549	NA	1700047F07Rik	RIKEN cDNA 1700047F07 gene [Source:MGI Symbol;Acc:MGI:1920570]	-2.5858	1.9077	52.3997	4.52791e-13	6.27122e-12
ENSMUSG00000042155	277396	Klhl23	kelch-like 23 [Source:MGI Symbol;Acc:MGI:2683536]	-1.04279	6.41129	52.3805	4.57241e-13	6.32757e-12
ENSMUSG00000063171	NA	Rps4l	ribosomal protein S4-like [Source:MGI Symbol;Acc:MGI:1913434]	1.79465	3.86568	52.3635	4.61211e-13	6.37721e-12
ENSMUSG00000031634	192169	Ufsp2	UFM1-specific peptidase 2 [Source:MGI Symbol;Acc:MGI:1913679]	0.952605	6.67471	52.3493	4.64566e-13	6.41827e-12
ENSMUSG00000037364	83701	Srrt	serrate RNA effector molecule homolog (Arabidopsis) [Source:MGI Symbol;Acc:MGI:1933527]	1.26004	4.94771	52.3231	4.70808e-13	6.49911e-12
ENSMUSG00000039661	66959	Dusp26	dual specificity phosphatase 26 (putative) [Source:MGI Symbol;Acc:MGI:1914209]	1.22932	5.84621	52.3176	4.72128e-13	6.51192e-12
ENSMUSG00000073940	15129	Hbb-bt	hemoglobin, beta adult t chain [Source:MGI Symbol;Acc:MGI:5474850]	-3.26071	4.06536	52.313	4.73235e-13	6.52178e-12
ENSMUSG00000000355	68995	Mcts1	malignant T cell amplified sequence 1 [Source:MGI Symbol;Acc:MGI:1916245]	1.16946	6.97659	52.2955	4.77469e-13	6.57469e-12
ENSMUSG00000032366	22003	Tpm1	tropomyosin 1, alpha [Source:MGI Symbol;Acc:MGI:98809]	1.02782	7.83468	52.2724	4.83124e-13	6.64189e-12
ENSMUSG00000026276	NA	2018-09-02	septin 2 [Source:MGI Symbol;Acc:MGI:97298]	-1.48885	8.18059	52.2723	4.83148e-13	6.64189e-12
ENSMUSG00000030209	14812	Grin2b	glutamate receptor, ionotropic, NMDA2B (epsilon 2) [Source:MGI Symbol;Acc:MGI:95821]	-1.63264	9.54215	52.2609	4.85945e-13	6.67482e-12
ENSMUSG00000030862	55987	Cpxm2	carboxypeptidase X 2 (M14 family) [Source:MGI Symbol;Acc:MGI:1926006]	-2.0183	1.42414	52.2552	4.87373e-13	6.68892e-12
ENSMUSG00000032525	18087	Nktr	natural killer tumor recognition sequence [Source:MGI Symbol;Acc:MGI:97346]	-1.70566	5.62064	52.2199	4.9621e-13	6.80458e-12
ENSMUSG00000015790	20930	Surf1	surfeit gene 1 [Source:MGI Symbol;Acc:MGI:98443]	0.953872	6.43315	52.1482	5.1465e-13	7.04985e-12
ENSMUSG00000020496	108660	Rnf187	ring finger protein 187 [Source:MGI Symbol;Acc:MGI:1914224]	1.28149	8.71428	52.1471	5.14944e-13	7.04985e-12
ENSMUSG00000024197	66905	Plin3	perilipin 3 [Source:MGI Symbol;Acc:MGI:1914155]	-3.17882	2.6022	52.1415	5.1642e-13	7.06425e-12
ENSMUSG00000056596	69539	Trnp1	TMF1-regulated nuclear protein 1 [Source:MGI Symbol;Acc:MGI:1916789]	1.41375	6.97741	52.1199	5.22138e-13	7.1366e-12
ENSMUSG00000050323	76947	Ndufaf6	NADH dehydrogenase (ubiquinone) complex I, assembly factor 6 [Source:MGI Symbol;Acc:MGI:1924197]	1.19877	2.65937	52.1161	5.23152e-13	7.14459e-12
ENSMUSG00000039656	20182	Rxrb	retinoid X receptor beta [Source:MGI Symbol;Acc:MGI:98215]	1.12588	4.28013	52.0454	5.42321e-13	7.40031e-12
ENSMUSG00000000792	114479	Slc5a5	solute carrier family 5 (sodium iodide symporter), member 5 [Source:MGI Symbol;Acc:MGI:2149330]	1.37899	4.13768	52.0372	5.4459e-13	7.42517e-12
ENSMUSG00000029442	269701	Wdr66	WD repeat domain 66 [Source:MGI Symbol;Acc:MGI:1918495]	-2.88276	1.54045	52.0178	5.49987e-13	7.49262e-12
ENSMUSG00000050600	100043757	Zfp831	zinc finger protein 831 [Source:MGI Symbol;Acc:MGI:3641861]	-1.5912	2.74712	52.013	5.51346e-13	7.50498e-12
ENSMUSG00000070733	72313	Fryl	FRY like transcription coactivator [Source:MGI Symbol;Acc:MGI:1919563]	-1.41633	5.32962	51.9747	5.62191e-13	7.64636e-12
ENSMUSG00000024548	240427	Setbp1	SET binding protein 1 [Source:MGI Symbol;Acc:MGI:1933199]	-1.00217	4.67947	51.9282	5.75688e-13	7.82353e-12
ENSMUSG00000032413	114713	Rasa2	RAS p21 protein activator 2 [Source:MGI Symbol;Acc:MGI:2149960]	-1.25809	5.30635	51.9133	5.80061e-13	7.87652e-12
ENSMUSG00000039904	14763	Gpr37	G protein-coupled receptor 37 [Source:MGI Symbol;Acc:MGI:1313297]	-2.02983	5.44368	51.9014	5.83594e-13	7.91803e-12
ENSMUSG00000075706	625249	Gpx4	glutathione peroxidase 4 [Source:MGI Symbol;Acc:MGI:104767]	1.54337	6.33911	51.8853	5.88383e-13	7.97649e-12
ENSMUSG00000031758	75796	Cdyl2	chromodomain protein, Y chromosome-like 2 [Source:MGI Symbol;Acc:MGI:1923046]	-1.01508	5.0127	51.8553	5.97449e-13	8.0928e-12
ENSMUSG00000024176	20681	Sox8	SRY (sex determining region Y)-box 8 [Source:MGI Symbol;Acc:MGI:98370]	-1.35039	4.36658	51.8448	6.00658e-13	8.12966e-12
ENSMUSG00000024187	106581	Fam234a	family with sequence similarity 234, member A [Source:MGI Symbol;Acc:MGI:2146854]	-1.60279	4.66881	51.8376	6.02877e-13	8.15306e-12
ENSMUSG00000035439	76478	Haus8	4HAUS augmin-like complex, subunit 8 [Source:MGI Symbol;Acc:MGI:1923728]	1.18202	3.06859	51.7896	6.17783e-13	8.34785e-12
ENSMUSG00000051316	24074	Taf7	TATA-box binding protein associated factor 7 [Source:MGI Symbol;Acc:MGI:1346348]	1.07262	4.32211	51.7814	6.20365e-13	8.37593e-12
ENSMUSG00000020083	69894	2010107G23Rik	RIKEN cDNA 2010107G23 gene [Source:MGI Symbol;Acc:MGI:1917144]	1.12121	4.40991	51.7505	6.30216e-13	8.50203e-12
ENSMUSG00000061360	68479	Phf5a	PHD finger protein 5A [Source:MGI Symbol;Acc:MGI:2156864]	1.04389	5.70885	51.746	6.31663e-13	8.51466e-12
ENSMUSG00000036572	68134	Upf3b	UPF3 regulator of nonsense transcripts homolog B (yeast) [Source:MGI Symbol;Acc:MGI:1915384]	0.989847	5.49458	51.7311	6.36466e-13	8.57245e-12
ENSMUSG00000027312	11990	Atrn	attractin [Source:MGI Symbol;Acc:MGI:1341628]	-1.14767	7.18615	51.6665	6.57739e-13	8.85181e-12
ENSMUSG00000020994	18949	Pnn	pinin [Source:MGI Symbol;Acc:MGI:1100514]	-1.07642	5.35244	51.6574	6.60824e-13	8.87934e-12
ENSMUSG00000031422	56397	Morf4l2	mortality factor 4 like 2 [Source:MGI Symbol;Acc:MGI:1927167]	1.14814	7.31535	51.6573	6.60853e-13	8.87934e-12
ENSMUSG00000022890	11957	Atp5j	ATP synthase, H+ transporting, mitochondrial F0 complex, subunit F [Source:MGI Symbol;Acc:MGI:107777]	1.73991	9.36021	51.6531	6.62253e-13	8.89098e-12
ENSMUSG00000041203	68544	2310036O22Rik	RIKEN cDNA 2310036O22 gene [Source:MGI Symbol;Acc:MGI:1922833]	1.37774	4.95248	51.6447	6.651e-13	8.92199e-12
ENSMUSG00000061119	72461	Prcp	prolylcarboxypeptidase (angiotensinase C) [Source:MGI Symbol;Acc:MGI:1919711]	-1.47809	3.65719	51.6225	6.72678e-13	9.01637e-12
ENSMUSG00000040188	24044	Scamp2	secretory carrier membrane protein 2 [Source:MGI Symbol;Acc:MGI:1346518]	-1.33802	4.91257	51.5987	6.80858e-13	9.11868e-12
ENSMUSG00000025997	22779	Ikzf2	IKAROS family zinc finger 2 [Source:MGI Symbol;Acc:MGI:1342541]	-2.37955	2.56464	51.5707	6.90645e-13	9.24231e-12
ENSMUSG00000039529	54670	Atp8b1	ATPase, class I, type 8B, member 1 [Source:MGI Symbol;Acc:MGI:1859665]	-2.76315	0.709667	51.5618	6.93796e-13	9.27701e-12
ENSMUSG00000027977	83398	Ndst3	N-deacetylase/N-sulfotransferase (heparan glucosaminyl) 3 [Source:MGI Symbol;Acc:MGI:1932544]	-1.26347	4.48474	51.5596	6.94574e-13	9.27996e-12
ENSMUSG00000026605	108000	Cenpf	centromere protein F [Source:MGI Symbol;Acc:MGI:1313302]	-2.27811	1.77506	51.553	6.96909e-13	9.30368e-12
ENSMUSG00000063882	66576	Uqcrh	ubiquinol-cytochrome c reductase hinge protein [Source:MGI Symbol;Acc:MGI:1913826]	1.70534	9.00693	51.5205	7.08536e-13	9.45132e-12
ENSMUSG00000033377	114301	Palmd	palmdelphin [Source:MGI Symbol;Acc:MGI:2148896]	-1.82668	3.60242	51.503	7.14862e-13	9.52791e-12
ENSMUSG00000030284	171508	Creld1	cysteine-rich with EGF-like domains 1 [Source:MGI Symbol;Acc:MGI:2152539]	1.20588	5.18196	51.5015	7.15423e-13	9.52791e-12
ENSMUSG00000024290	19877	Rock1	Rho-associated coiled-coil containing protein kinase 1 [Source:MGI Symbol;Acc:MGI:107927]	-1.87951	5.99121	51.4962	7.17344e-13	9.54584e-12
ENSMUSG00000061578	333050	Ksr2	kinase suppressor of ras 2 [Source:MGI Symbol;Acc:MGI:3610315]	-1.01084	5.06086	51.488	7.20347e-13	9.57814e-12
ENSMUSG00000032589	12217	Bsn	bassoon [Source:MGI Symbol;Acc:MGI:1277955]	-1.58973	8.75151	51.4776	7.24196e-13	9.61995e-12
ENSMUSG00000051671	67892	Coa6	cytochrome c oxidase assembly factor 6 [Source:MGI Symbol;Acc:MGI:1915142]	1.49138	3.5151	51.4764	7.24648e-13	9.61995e-12
ENSMUSG00000053965	242202	Pde5a	phosphodiesterase 5A, cGMP-specific [Source:MGI Symbol;Acc:MGI:2651499]	1.51701	3.28807	51.4539	7.32977e-13	9.7185e-12
ENSMUSG00000036030	235472	Prtg	protogenin [Source:MGI Symbol;Acc:MGI:2444710]	-2.42156	1.32226	51.4532	7.33241e-13	9.7185e-12
ENSMUSG00000064326	30954	Siva1	SIVA1, apoptosis-inducing factor [Source:MGI Symbol;Acc:MGI:1353606]	1.1817	3.74416	51.438	7.38938e-13	9.78623e-12
ENSMUSG00000040824	107686	Snrpd2	small nuclear ribonucleoprotein D2 [Source:MGI Symbol;Acc:MGI:98345]	1.22126	5.431	51.4261	7.43443e-13	9.83805e-12
ENSMUSG00000024067	66310	Dpy30	dpy-30, histone methyltransferase complex regulatory subunit [Source:MGI Symbol;Acc:MGI:1913560]	1.23095	6.35757	51.424	7.44233e-13	9.84067e-12
ENSMUSG00000045036	381107	Tmem232	transmembrane protein 232 [Source:MGI Symbol;Acc:MGI:2685786]	-1.9159	1.85327	51.4133	7.48299e-13	9.88659e-12
ENSMUSG00000031231	66142	Cox7b	cytochrome c oxidase subunit VIIb [Source:MGI Symbol;Acc:MGI:1913392]	1.67913	9.16905	51.4048	7.51528e-13	9.92136e-12
ENSMUSG00000035696	73469	Rnf38	ring finger protein 38 [Source:MGI Symbol;Acc:MGI:1920719]	-1.06469	4.91382	51.383	7.59942e-13	1.00245e-11
ENSMUSG00000024516	66286	Sec11c	SEC11 homolog C, signal peptidase complex subunit [Source:MGI Symbol;Acc:MGI:1913536]	0.991595	6.28001	51.3504	7.72679e-13	1.01829e-11
ENSMUSG00000025809	16412	Itgb1	integrin beta 1 (fibronectin receptor beta) [Source:MGI Symbol;Acc:MGI:96610]	-1.23068	6.25273	51.3491	7.73174e-13	1.01829e-11
ENSMUSG00000027133	66181	Nop10	NOP10 ribonucleoprotein [Source:MGI Symbol;Acc:MGI:1913431]	1.70988	8.35108	51.3123	7.87813e-13	1.03675e-11
ENSMUSG00000042406	11911	Atf4	activating transcription factor 4 [Source:MGI Symbol;Acc:MGI:88096]	1.07551	6.33427	51.3074	7.89767e-13	1.0385e-11
ENSMUSG00000029397	68098	Rchy1	ring finger and CHY zinc finger domain containing 1 [Source:MGI Symbol;Acc:MGI:1915348]	1.07632	5.58834	51.22	8.25718e-13	1.08491e-11
ENSMUSG00000040713	433375	Creg1	cellular repressor of E1A-stimulated genes 1 [Source:MGI Symbol;Acc:MGI:1344382]	1.22664	4.55284	51.1983	8.34911e-13	1.09613e-11
ENSMUSG00000036402	14701	Gng12	guanine nucleotide binding protein (G protein), gamma 12 [Source:MGI Symbol;Acc:MGI:1336171]	-1.83068	6.57958	51.1961	8.35855e-13	1.0965e-11
ENSMUSG00000038126	269702	Mphosph9	M-phase phosphoprotein 9 [Source:MGI Symbol;Acc:MGI:2443138]	-1.65437	4.0079	51.1679	8.47932e-13	1.11147e-11
ENSMUSG00000030161	57436	Gabarapl1	gamma-aminobutyric acid (GABA) A receptor-associated protein-like 1 [Source:MGI Symbol;Acc:MGI:1914980]	1.35275	8.9914	51.1485	8.56371e-13	1.12164e-11
ENSMUSG00000021592	77041	Arsk	arylsulfatase K [Source:MGI Symbol;Acc:MGI:1924291]	-1.61988	2.75452	51.1466	8.57208e-13	1.12186e-11
ENSMUSG00000026032	66495	Ndufb3	NADH dehydrogenase (ubiquinone) 1 beta subcomplex 3 [Source:MGI Symbol;Acc:MGI:1913745]	1.46559	7.18612	51.1214	8.68281e-13	1.13546e-11
ENSMUSG00000002395	67023	Use1	unconventional SNARE in the ER 1 homolog (S. cerevisiae) [Source:MGI Symbol;Acc:MGI:1914273]	0.985269	6.39624	51.1134	8.7179e-13	1.13879e-11
ENSMUSG00000062760	72301	1810041L15Rik	RIKEN cDNA 1810041L15 gene [Source:MGI Symbol;Acc:MGI:1919551]	-1.14427	6.19532	51.1125	8.72202e-13	1.13879e-11
ENSMUSG00000022696	320007	Sidt1	SID1 transmembrane family, member 1 [Source:MGI Symbol;Acc:MGI:2443155]	-1.66198	6.72204	51.1042	8.75927e-13	1.14276e-11
ENSMUSG00000078515	68817	Ddi2	DNA-damage inducible protein 2 [Source:MGI Symbol;Acc:MGI:1917244]	-1.27198	6.12104	51.0723	8.90275e-13	1.16057e-11
ENSMUSG00000035278	78670	Plekhj1	pleckstrin homology domain containing, family J member 1 [Source:MGI Symbol;Acc:MGI:1925920]	1.24282	4.31011	51.0576	8.96954e-13	1.16836e-11
ENSMUSG00000026201	20872	Stk16	serine/threonine kinase 16 [Source:MGI Symbol;Acc:MGI:1313271]	1.02558	5.57864	51.045	9.0271e-13	1.17494e-11
ENSMUSG00000024565	20689	Sall3	sal-like 3 (Drosophila) [Source:MGI Symbol;Acc:MGI:109295]	-1.65681	2.79422	50.9801	9.33071e-13	1.2135e-11
ENSMUSG00000051185	67698	Fam174a	family with sequence similarity 174, member A [Source:MGI Symbol;Acc:MGI:1914948]	1.41678	5.85486	50.9609	9.42248e-13	1.22412e-11
ENSMUSG00000024841	69860	Eif1ad	eukaryotic translation initiation factor 1A domain containing [Source:MGI Symbol;Acc:MGI:1917110]	1.15628	4.95076	50.9599	9.42707e-13	1.22412e-11
ENSMUSG00000039068	108946	Zzz3	zinc finger, ZZ domain containing 3 [Source:MGI Symbol;Acc:MGI:1920453]	-0.915836	4.99166	50.9581	9.43586e-13	1.22431e-11
ENSMUSG00000005899	77626	Smpd4	sphingomyelin phosphodiesterase 4 [Source:MGI Symbol;Acc:MGI:1924876]	-2.13829	4.99079	50.9515	9.46763e-13	1.22747e-11
ENSMUSG00000029048	67830	Rer1	retention in endoplasmic reticulum sorting receptor 1 [Source:MGI Symbol;Acc:MGI:1915080]	1.01477	5.56911	50.9426	9.51084e-13	1.23211e-11
ENSMUSG00000054312	66292	Mrps21	mitochondrial ribosomal protein S21 [Source:MGI Symbol;Acc:MGI:1913542]	1.48363	6.77628	50.9347	9.54903e-13	1.2361e-11
ENSMUSG00000039954	269019	Stk32a	serine/threonine kinase 32A [Source:MGI Symbol;Acc:MGI:2442403]	1.79225	2.47398	50.9206	9.61794e-13	1.24405e-11
ENSMUSG00000030020	243548	Prickle2	prickle planar cell polarity protein 2 [Source:MGI Symbol;Acc:MGI:1925144]	-1.25508	7.49965	50.898	9.7294e-13	1.25749e-11
ENSMUSG00000046352	14619	Gjb2	gap junction protein, beta 2 [Source:MGI Symbol;Acc:MGI:95720]	-2.64506	2.86216	50.8959	9.73951e-13	1.25782e-11
ENSMUSG00000027406	170718	Idh3b	isocitrate dehydrogenase 3 (NAD+) beta [Source:MGI Symbol;Acc:MGI:2158650]	1.15376	8.16962	50.8772	9.83295e-13	1.2689e-11
ENSMUSG00000041000	67525	Trim62	tripartite motif-containing 62 [Source:MGI Symbol;Acc:MGI:1914775]	1.12128	4.63617	50.8688	9.87534e-13	1.27338e-11
ENSMUSG00000020265	20610	Sumo3	small ubiquitin-like modifier 3 [Source:MGI Symbol;Acc:MGI:1336201]	1.10067	7.65709	50.8375	1.0034e-12	1.29284e-11
ENSMUSG00000046480	399548	Scn4b	sodium channel, type IV, beta [Source:MGI Symbol;Acc:MGI:2687406]	1.74327	6.31356	50.8299	1.0073e-12	1.29686e-11
ENSMUSG00000019738	69920	Polr2i	polymerase (RNA) II (DNA directed) polypeptide I [Source:MGI Symbol;Acc:MGI:1917170]	1.15858	5.25497	50.8181	1.01336e-12	1.30366e-11
ENSMUSG00000025949	18711	Pikfyve	phosphoinositide kinase, FYVE finger containing [Source:MGI Symbol;Acc:MGI:1335106]	-1.22548	4.83469	50.8165	1.01417e-12	1.30369e-11
ENSMUSG00000028337	107684	Coro2a	coronin, actin binding protein 2A [Source:MGI Symbol;Acc:MGI:1345966]	-1.17284	4.07086	50.8078	1.01867e-12	1.30846e-11
ENSMUSG00000024777	225849	Ppp2r5b	protein phosphatase 2, regulatory subunit B', beta [Source:MGI Symbol;Acc:MGI:2388480]	1.2822	4.23177	50.7998	1.02286e-12	1.31271e-11
ENSMUSG00000013584	19378	Aldh1a2	aldehyde dehydrogenase family 1, subfamily A2 [Source:MGI Symbol;Acc:MGI:107928]	-2.5286	1.87069	50.7984	1.02356e-12	1.31271e-11
ENSMUSG00000075595	268469	Zfp652	zinc finger protein 652 [Source:MGI Symbol;Acc:MGI:2442221]	-1.23546	4.75441	50.7706	1.03817e-12	1.33043e-11
ENSMUSG00000006442	20810	Srm	spermidine synthase [Source:MGI Symbol;Acc:MGI:102690]	1.08677	5.48593	50.72	1.06527e-12	1.3641e-11
ENSMUSG00000020790	11736	Ankfy1	ankyrin repeat and FYVE domain containing 1 [Source:MGI Symbol;Acc:MGI:1337008]	-1.22801	4.72836	50.7146	1.0682e-12	1.3668e-11
ENSMUSG00000030917	233806	Tmem159	transmembrane protein 159 [Source:MGI Symbol;Acc:MGI:1925752]	-1.32572	4.38393	50.7056	1.07314e-12	1.37207e-11
ENSMUSG00000053877	100043597	Srcap	Snf2-related CREBBP activator protein [Source:MGI Symbol;Acc:MGI:2444036]	-1.13028	5.95482	50.6982	1.07719e-12	1.37619e-11
ENSMUSG00000008855	15184	Hdac5	histone deacetylase 5 [Source:MGI Symbol;Acc:MGI:1333784]	1.03668	5.2046	50.6819	1.08618e-12	1.38661e-11
ENSMUSG00000026248	69163	Mrpl44	mitochondrial ribosomal protein L44 [Source:MGI Symbol;Acc:MGI:1916413]	1.08267	5.15996	50.6664	1.09475e-12	1.39648e-11
ENSMUSG00000032705	97827	Exd2	exonuclease 3'-5' domain containing 2 [Source:MGI Symbol;Acc:MGI:1922485]	-1.21056	6.22776	50.6239	1.11876e-12	1.4254e-11
ENSMUSG00000037197	76938	Rbm17	RNA binding motif protein 17 [Source:MGI Symbol;Acc:MGI:1924188]	0.996012	5.18125	50.6232	1.11914e-12	1.4254e-11
ENSMUSG00000020441	67862	2310033P09Rik	RIKEN cDNA 2310033P09 gene [Source:MGI Symbol;Acc:MGI:1915112]	0.971545	3.61328	50.5908	1.13777e-12	1.44642e-11
ENSMUSG00000021771	22334	Vdac2	voltage-dependent anion channel 2 [Source:MGI Symbol;Acc:MGI:106915]	1.09423	7.99786	50.5903	1.13808e-12	1.44642e-11
ENSMUSG00000028864	15234	Hgf	hepatocyte growth factor [Source:MGI Symbol;Acc:MGI:96079]	-2.55929	1.04605	50.59	1.13825e-12	1.44642e-11
ENSMUSG00000007207	20907	Stx1a	syntaxin 1A (brain) [Source:MGI Symbol;Acc:MGI:109355]	-1.45055	7.701	50.5196	1.17982e-12	1.49728e-11
ENSMUSG00000042462	66422	Dctpp1	dCTP pyrophosphatase 1 [Source:MGI Symbol;Acc:MGI:1913672]	1.19811	4.74247	50.5192	1.18008e-12	1.49728e-11
ENSMUSG00000056158	72605	Car10	carbonic anhydrase 10 [Source:MGI Symbol;Acc:MGI:1919855]	-1.29295	7.21816	50.5121	1.18435e-12	1.50156e-11
ENSMUSG00000056938	67131	Acbd4	acyl-Coenzyme A binding domain containing 4 [Source:MGI Symbol;Acc:MGI:1914381]	1.28548	2.79584	50.4981	1.19279e-12	1.51111e-11
ENSMUSG00000034903	319876	Cobll1	Cobl-like 1 [Source:MGI Symbol;Acc:MGI:2442894]	-2.88745	1.88571	50.4955	1.19441e-12	1.51201e-11
ENSMUSG00000022466	71919	Rpap3	RNA polymerase II associated protein 3 [Source:MGI Symbol;Acc:MGI:1277218]	1.11111	4.44654	50.4837	1.20161e-12	1.51997e-11
ENSMUSG00000026360	19735	Rgs2	regulator of G-protein signaling 2 [Source:MGI Symbol;Acc:MGI:1098271]	1.43736	6.89743	50.4499	1.22249e-12	1.54521e-11
ENSMUSG00000020940	69441	1700023F06Rik	RIKEN cDNA 1700023F06 gene [Source:MGI Symbol;Acc:MGI:1916691]	2.8107	0.491285	50.4378	1.23005e-12	1.55358e-11
ENSMUSG00000029815	75593	Malsu1	mitochondrial assembly of ribosomal large subunit 1 [Source:MGI Symbol;Acc:MGI:1922843]	1.50579	2.92113	50.3934	1.25814e-12	1.58785e-11
ENSMUSG00000058706	68364	0610030E20Rik	RIKEN cDNA 0610030E20 gene [Source:MGI Symbol;Acc:MGI:1915614]	-1.30057	3.21943	50.3621	1.27836e-12	1.61215e-11
ENSMUSG00000036371	66870	Serbp1	serpine1 mRNA binding protein 1 [Source:MGI Symbol;Acc:MGI:1914120]	1.00559	7.42648	50.358	1.28105e-12	1.61432e-11
ENSMUSG00000027860	229658	Vangl1	vang-like 1 (van gogh, Drosophila) [Source:MGI Symbol;Acc:MGI:2159344]	-2.40481	1.40629	50.3523	1.28478e-12	1.61779e-11
ENSMUSG00000078765	233073	U2af1l4	U2 small nuclear RNA auxiliary factor 1-like 4 [Source:MGI Symbol;Acc:MGI:2678374]	0.980396	5.34696	50.308	1.3141e-12	1.65346e-11
ENSMUSG00000035681	268345	Kcnc2	potassium voltage gated channel, Shaw-related subfamily, member 2 [Source:MGI Symbol;Acc:MGI:96668]	1.37898	7.44206	50.3001	1.31943e-12	1.65891e-11
ENSMUSG00000028187	70285	Rpf1	ribosome production factor 1 homolog [Source:MGI Symbol;Acc:MGI:1917535]	1.35343	3.56084	50.2961	1.32213e-12	1.66104e-11
ENSMUSG00000002055	54141	Spag5	sperm associated antigen 5 [Source:MGI Symbol;Acc:MGI:1927470]	-2.20707	2.78799	50.2912	1.32545e-12	1.66396e-11
ENSMUSG00000087022	NA	9130024F11Rik	RIKEN cDNA 9130024F11 gene [Source:MGI Symbol;Acc:MGI:1926150]	-2.20065	3.77894	50.2748	1.33656e-12	1.67665e-11
ENSMUSG00000026640	18845	Plxna2	plexin A2 [Source:MGI Symbol;Acc:MGI:107684]	-1.31793	7.69925	50.248	1.35495e-12	1.69844e-11
ENSMUSG00000037296	67207	Lsm1	LSM1 homolog, mRNA degradation associated [Source:MGI Symbol;Acc:MGI:1914457]	1.36155	4.79352	50.16	1.41711e-12	1.77501e-11
ENSMUSG00000021338	68732	Carmil1	capping protein regulator and myosin 1 linker 1 [Source:MGI Symbol;Acc:MGI:1915982]	-1.7703	3.81831	50.129	1.43962e-12	1.80186e-11
ENSMUSG00000096054	64009	Syne1	spectrin repeat containing, nuclear envelope 1 [Source:MGI Symbol;Acc:MGI:1927152]	-1.32425	7.86803	50.1038	1.45822e-12	1.82376e-11
ENSMUSG00000057522	20747	Spop	speckle-type POZ protein [Source:MGI Symbol;Acc:MGI:1343085]	-1.37485	7.36406	50.0903	1.46833e-12	1.83503e-11
ENSMUSG00000036473	18209	Tbc1d24	TBC1 domain family, member 24 [Source:MGI Symbol;Acc:MGI:2443456]	-1.06674	5.76643	50.0653	1.48713e-12	1.85713e-11
ENSMUSG00000047888	213988	Tnrc6b	trinucleotide repeat containing 6b [Source:MGI Symbol;Acc:MGI:2443730]	-1.07954	5.56886	50.0106	1.52921e-12	1.90825e-11
ENSMUSG00000025085	226251	Ablim1	actin-binding LIM protein 1 [Source:MGI Symbol;Acc:MGI:1194500]	-1.06762	6.77671	49.9672	1.56335e-12	1.94939e-11
ENSMUSG00000035033	21375	Tbr1	T-box brain gene 1 [Source:MGI Symbol;Acc:MGI:107404]	-2.5853	5.74572	49.92	1.60147e-12	1.99476e-11
ENSMUSG00000019689	66117	Fmc1	formation of mitochondrial complex V assembly factor 1 [Source:MGI Symbol;Acc:MGI:1913367]	1.70687	4.91885	49.9183	1.60282e-12	1.99476e-11
ENSMUSG00000024165	52009	Hn1l	hematological and neurological expressed 1-like [Source:MGI Symbol;Acc:MGI:1196260]	-1.6161	2.51141	49.9177	1.60334e-12	1.99476e-11
ENSMUSG00000006941	68969	Eif1b	eukaryotic translation initiation factor 1B [Source:MGI Symbol;Acc:MGI:1916219]	1.20271	7.07312	49.9033	1.61516e-12	2.00796e-11
ENSMUSG00000032002	76863	Dcun1d5	DCN1, defective in cullin neddylation 1, domain containing 5 (S. cerevisiae) [Source:MGI Symbol;Acc:MGI:1924113]	1.17177	6.04723	49.896	1.62116e-12	2.01379e-11
ENSMUSG00000028514	329908	Usp24	ubiquitin specific peptidase 24 [Source:MGI Symbol;Acc:MGI:1919936]	-1.1023	4.74814	49.8946	1.62227e-12	2.01379e-11
ENSMUSG00000097453	NA	Gm26894	predicted gene, 26894 [Source:MGI Symbol;Acc:MGI:5477388]	2.39008	0.588748	49.8816	1.63311e-12	2.02574e-11
ENSMUSG00000028518	108079	Prkaa2	protein kinase, AMP-activated, alpha 2 catalytic subunit [Source:MGI Symbol;Acc:MGI:1336173]	-1.07546	5.25135	49.8722	1.6409e-12	2.03388e-11
ENSMUSG00000069874	54396	Irgm2	immunity-related GTPase family M member 2 [Source:MGI Symbol;Acc:MGI:1926262]	-2.77459	1.25824	49.8633	1.64839e-12	2.04165e-11
ENSMUSG00000032463	23873	Faim	Fas apoptotic inhibitory molecule [Source:MGI Symbol;Acc:MGI:1344387]	1.21413	4.37474	49.8577	1.65311e-12	2.04597e-11
ENSMUSG00000042453	19699	Reln	reelin [Source:MGI Symbol;Acc:MGI:103022]	1.4839	7.47854	49.8365	1.67103e-12	2.06661e-11
ENSMUSG00000047084	83485	Ngrn	neugrin, neurite outgrowth associated [Source:MGI Symbol;Acc:MGI:1933212]	1.0447	4.78951	49.8244	1.6814e-12	2.07789e-11
ENSMUSG00000005681	11807	Apoa2	apolipoprotein A-II [Source:MGI Symbol;Acc:MGI:88050]	1.97455	1.09276	49.806	1.69728e-12	2.09596e-11
ENSMUSG00000087687	100503890	Pet100	PET100 homolog [Source:MGI Symbol;Acc:MGI:3615306]	1.36253	6.12821	49.7586	1.73873e-12	2.14556e-11
ENSMUSG00000029066	66448	Mrpl20	mitochondrial ribosomal protein L20 [Source:MGI Symbol;Acc:MGI:2137221]	1.284	7.42661	49.7077	1.78447e-12	2.1988e-11
ENSMUSG00000019054	66437	Fis1	fission, mitochondrial 1 [Source:MGI Symbol;Acc:MGI:1913687]	1.28776	7.632	49.7076	1.78453e-12	2.1988e-11
ENSMUSG00000075467	52838	Dnlz	DNL-type zinc finger [Source:MGI Symbol;Acc:MGI:106559]	1.21943	4.624	49.7039	1.78787e-12	2.20129e-11
ENSMUSG00000081225	242546	Cyp2j12	cytochrome P450, family 2, subfamily j, polypeptide 12 [Source:MGI Symbol;Acc:MGI:3717097]	-2.65867	2.34802	49.6981	1.79323e-12	2.20574e-11
ENSMUSG00000037486	NA	Asxl2	additional sex combs like 2 (Drosophila) [Source:MGI Symbol;Acc:MGI:1922552]	-1.29568	4.88673	49.6971	1.79414e-12	2.20574e-11
ENSMUSG00000031232	67075	Magt1	magnesium transporter 1 [Source:MGI Symbol;Acc:MGI:1914325]	-2.44173	5.06543	49.6921	1.79867e-12	2.20969e-11
ENSMUSG00000060257	545474	Scrt2	scratch family zinc finger 2 [Source:MGI Symbol;Acc:MGI:2139287]	1.65717	1.9081	49.682	1.80795e-12	2.21944e-11
ENSMUSG00000028949	66993	Smarcd3	SWI/SNF related, matrix associated, actin dependent regulator of chromatin, subfamily d, member 3 [Source:MGI Symbol;Acc:MGI:1914243]	1.4844	2.3716	49.6756	1.81385e-12	2.22505e-11
ENSMUSG00000043372	71059	Hexim2	hexamethylene bis-acetamide inducible 2 [Source:MGI Symbol;Acc:MGI:1918309]	1.60993	2.97727	49.6457	1.84171e-12	2.25755e-11
ENSMUSG00000007989	14365	Fzd3	frizzled class receptor 3 [Source:MGI Symbol;Acc:MGI:108476]	-1.21671	4.52927	49.6173	1.8686e-12	2.28883e-11
ENSMUSG00000055720	69459	Ubl7	ubiquitin-like 7 (bone marrow stromal cell-derived) [Source:MGI Symbol;Acc:MGI:1916709]	0.924956	6.16475	49.5989	1.88622e-12	2.30871e-11
ENSMUSG00000073616	66915	Cops9	COP9 signalosome subunit 9 [Source:MGI Symbol;Acc:MGI:1914165]	1.32076	7.21535	49.5883	1.89643e-12	2.3195e-11
ENSMUSG00000033983	12812	Coil	coilin [Source:MGI Symbol;Acc:MGI:104842]	1.2393	2.79112	49.5836	1.90098e-12	2.32336e-11
ENSMUSG00000043067	244745	Dpy19l1	dpy-19-like 1 (C. elegans) [Source:MGI Symbol;Acc:MGI:1915685]	-1.29746	7.18287	49.5573	1.92657e-12	2.35291e-11
ENSMUSG00000053137	19094	Mapk11	mitogen-activated protein kinase 11 [Source:MGI Symbol;Acc:MGI:1338024]	-1.60087	4.65929	49.514	1.96959e-12	2.40368e-11
ENSMUSG00000035953	219024	Tmem55b	transmembrane protein 55b [Source:MGI Symbol;Acc:MGI:2448501]	1.03613	6.33779	49.4772	2.00692e-12	2.44744e-11
ENSMUSG00000022421	73340	Nptxr	neuronal pentraxin receptor [Source:MGI Symbol;Acc:MGI:1920590]	-1.73474	9.261	49.4622	2.02229e-12	2.46438e-11
ENSMUSG00000031970	72185	Dbndd1	dysbindin (dystrobrevin binding protein 1) domain containing 1 [Source:MGI Symbol;Acc:MGI:1919435]	1.21019	4.16421	49.4137	2.07296e-12	2.52428e-11
ENSMUSG00000028367	22166	Txn1	thioredoxin 1 [Source:MGI Symbol;Acc:MGI:98874]	1.19947	7.00201	49.4081	2.07883e-12	2.52957e-11
ENSMUSG00000030711	20887	Sult1a1	sulfotransferase family 1A, phenol-preferring, member 1 [Source:MGI Symbol;Acc:MGI:102896]	-2.26873	4.56098	49.3958	2.09193e-12	2.54365e-11
ENSMUSG00000002105	68427	Slc39a13	solute carrier family 39 (metal ion transporter), member 13 [Source:MGI Symbol;Acc:MGI:1915677]	1.24455	4.06867	49.3651	2.12493e-12	2.58189e-11
ENSMUSG00000034731	380921	Dgkh	diacylglycerol kinase, eta [Source:MGI Symbol;Acc:MGI:2444188]	-1.51025	5.00364	49.3532	2.13782e-12	2.59566e-11
ENSMUSG00000018126	207495	Baiap2l2	BAI1-associated protein 2-like 2 [Source:MGI Symbol;Acc:MGI:2652819]	2.44418	-0.0893525	49.3418	2.1503e-12	2.60891e-11
ENSMUSG00000021996	13885	Esd	esterase D/formylglutathione hydrolase [Source:MGI Symbol;Acc:MGI:95421]	1.08188	6.98072	49.3297	2.16364e-12	2.62318e-11
ENSMUSG00000043162	66459	Pyurf	Pigy upstream reading frame [Source:MGI Symbol;Acc:MGI:1913709]	1.52224	3.87589	49.3238	2.1701e-12	2.62909e-11
ENSMUSG00000021194	12652	Chga	chromogranin A [Source:MGI Symbol;Acc:MGI:88394]	1.20783	6.27482	49.2654	2.23571e-12	2.70661e-11
ENSMUSG00000003299	66163	Mrpl4	mitochondrial ribosomal protein L4 [Source:MGI Symbol;Acc:MGI:2137210]	1.0871	5.23195	49.248	2.25558e-12	2.72868e-11
ENSMUSG00000060798	380614	Intu	inturned planar cell polarity protein [Source:MGI Symbol;Acc:MGI:2443752]	-1.57105	2.30915	49.1778	2.33781e-12	2.8261e-11
ENSMUSG00000052593	11491	Adam17	a disintegrin and metallopeptidase domain 17 [Source:MGI Symbol;Acc:MGI:1096335]	-1.57358	3.21015	49.1445	2.37781e-12	2.87237e-11
ENSMUSG00000028106	75137	Rprd2	regulation of nuclear pre-mRNA domain containing 2 [Source:MGI Symbol;Acc:MGI:1922387]	-0.842353	5.23334	49.1291	2.39655e-12	2.8929e-11
ENSMUSG00000047547	74325	Cltb	clathrin, light polypeptide (Lcb) [Source:MGI Symbol;Acc:MGI:1921575]	1.18247	7.10262	49.1272	2.39889e-12	2.89363e-11
ENSMUSG00000000125	22415	Wnt3	wingless-type MMTV integration site family, member 3 [Source:MGI Symbol;Acc:MGI:98955]	-1.67263	1.93652	49.1208	2.40672e-12	2.90097e-11
ENSMUSG00000036545	216725	Adamts2	a disintegrin-like and metallopeptidase (reprolysin type) with thrombospondin type 1 motif, 2 [Source:MGI Symbol;Acc:MGI:1347356]	-1.91399	3.02198	49.1137	2.41551e-12	2.90946e-11
ENSMUSG00000026437	18557	Cdk18	cyclin-dependent kinase 18 [Source:MGI Symbol;Acc:MGI:97518]	-1.39158	3.70436	49.0973	2.43576e-12	2.93172e-11
ENSMUSG00000043154	235542	Ppp2r3a	protein phosphatase 2, regulatory subunit B'', alpha [Source:MGI Symbol;Acc:MGI:2442104]	-1.12296	5.37504	49.0868	2.44877e-12	2.94525e-11
ENSMUSG00000068184	75597	Ndufaf2	NADH dehydrogenase (ubiquinone) 1 alpha subcomplex, assembly factor 2 [Source:MGI Symbol;Acc:MGI:1922847]	1.33372	6.0675	49.0584	2.48452e-12	2.98609e-11
ENSMUSG00000004268	14791	Emg1	EMG1 N1-specific pseudouridine methyltransferase [Source:MGI Symbol;Acc:MGI:1315195]	0.979295	5.42286	49.0517	2.493e-12	2.99412e-11
ENSMUSG00000036469	72925	2018-03-01	membrane-associated ring finger (C3HC4) 1 [Source:MGI Symbol;Acc:MGI:1920175]	-1.33593	4.38896	49.0436	2.50341e-12	3.00446e-11
ENSMUSG00000048138	226049	Dmrt2	doublesex and mab-3 related transcription factor 2 [Source:MGI Symbol;Acc:MGI:1330307]	1.79789	0.962704	49.007	2.55052e-12	3.05878e-11
ENSMUSG00000015659	321007	Serac1	serine active site containing 1 [Source:MGI Symbol;Acc:MGI:2447813]	-1.69881	2.68126	48.9975	2.56295e-12	3.07148e-11
ENSMUSG00000047617	227622	BC029214	cDNA sequence BC029214 [Source:MGI Symbol;Acc:MGI:2442831]	1.26366	4.75014	48.9707	2.59812e-12	3.11139e-11
ENSMUSG00000028398	66928	Tmem261	transmembrane protein 261 [Source:MGI Symbol;Acc:MGI:1914178]	1.0875	4.90176	48.9578	2.61525e-12	3.12964e-11
ENSMUSG00000048078	23966	Tenm4	teneurin transmembrane protein 4 [Source:MGI Symbol;Acc:MGI:2447063]	-1.1587	6.7594	48.9471	2.62958e-12	3.14453e-11
ENSMUSG00000057967	14172	Fgf18	fibroblast growth factor 18 [Source:MGI Symbol;Acc:MGI:1277980]	2.07157	0.983512	48.9187	2.66797e-12	3.18815e-11
ENSMUSG00000019849	19072	Prep	prolyl endopeptidase [Source:MGI Symbol;Acc:MGI:1270863]	1.10351	3.86389	48.9148	2.67328e-12	3.1922e-11
ENSMUSG00000023175	12215	Bsg	basigin [Source:MGI Symbol;Acc:MGI:88208]	1.26758	7.39706	48.9115	2.67775e-12	3.19524e-11
ENSMUSG00000037740	99045	Mrps26	mitochondrial ribosomal protein S26 [Source:MGI Symbol;Acc:MGI:1333830]	1.15521	4.59852	48.9071	2.68372e-12	3.20007e-11
ENSMUSG00000020483	68097	Dynll2	dynein light chain LC8-type 2 [Source:MGI Symbol;Acc:MGI:1915347]	1.45317	8.10222	48.9018	2.69107e-12	3.20654e-11
ENSMUSG00000068882	20823	Ssb	Sjogren syndrome antigen B [Source:MGI Symbol;Acc:MGI:98423]	0.957099	7.08087	48.8916	2.70513e-12	3.22099e-11
ENSMUSG00000016559	15081	H3f3b	H3 histone, family 3B [Source:MGI Symbol;Acc:MGI:1101768]	1.0781	7.09092	48.8755	2.72742e-12	3.2452e-11
ENSMUSG00000027489	56846	Necab3	N-terminal EF-hand calcium binding protein 3 [Source:MGI Symbol;Acc:MGI:1861721]	-1.32023	5.71929	48.8552	2.75579e-12	3.27661e-11
ENSMUSG00000093536	100042450	Smim17	small integral membrane protein 17 [Source:MGI Symbol;Acc:MGI:4365374]	1.34914	2.73141	48.8459	2.76877e-12	3.2897e-11
ENSMUSG00000036528	19024	Ppfibp2	PTPRF interacting protein, binding protein 2 (liprin beta 2) [Source:MGI Symbol;Acc:MGI:894649]	-1.67058	2.88245	48.8395	2.77795e-12	3.29813e-11
ENSMUSG00000022564	66168	Grina	glutamate receptor, ionotropic, N-methyl D-aspartate-associated protein 1 (glutamate binding) [Source:MGI Symbol;Acc:MGI:1913418]	1.27906	9.24711	48.8381	2.77984e-12	3.29813e-11
ENSMUSG00000046230	271564	Vps13a	vacuolar protein sorting 13A [Source:MGI Symbol;Acc:MGI:2444304]	-1.4268	4.22007	48.8022	2.83127e-12	3.35676e-11
ENSMUSG00000054162	72902	Spock3	sparc/osteonectin, cwcv and kazal-like domains proteoglycan 3 [Source:MGI Symbol;Acc:MGI:1920152]	1.67079	7.50747	48.7889	2.85044e-12	3.37708e-11
ENSMUSG00000040606	71529	Kazn	kazrin, periplakin interacting protein [Source:MGI Symbol;Acc:MGI:1918779]	1.07878	6.16129	48.7583	2.89526e-12	3.42774e-11
ENSMUSG00000026388	73103	3110009E18Rik	RIKEN cDNA 3110009E18 gene [Source:MGI Symbol;Acc:MGI:1920353]	1.27085	2.30586	48.7394	2.92328e-12	3.45845e-11
ENSMUSG00000022681	18203	Ntan1	N-terminal Asn amidase [Source:MGI Symbol;Acc:MGI:108471]	1.04657	5.31161	48.7129	2.96315e-12	3.50313e-11
ENSMUSG00000038463	320078	Olfml2b	olfactomedin-like 2B [Source:MGI Symbol;Acc:MGI:2443310]	-2.55074	3.31824	48.7102	2.96726e-12	3.5055e-11
ENSMUSG00000051985	226438	Igfn1	immunoglobulin-like and fibronectin type III domain containing 1 [Source:MGI Symbol;Acc:MGI:3045352]	-2.56517	1.44428	48.7055	2.97429e-12	3.51131e-11
ENSMUSG00000071649	72727	B3gat3	beta-1,3-glucuronyltransferase 3 (glucuronosyltransferase I) [Source:MGI Symbol;Acc:MGI:1919977]	0.934706	6.33015	48.701	2.98116e-12	3.51693e-11
ENSMUSG00000039016	30057	Timm8b	translocase of inner mitochondrial membrane 8B [Source:MGI Symbol;Acc:MGI:1353424]	1.52807	8.40632	48.687	3.00253e-12	3.53962e-11
ENSMUSG00000067925	66158	Cxx1a	CAAX box 1A [Source:MGI Symbol;Acc:MGI:1913408]	1.42744	3.26264	48.6549	3.05202e-12	3.59338e-11
ENSMUSG00000051343	52055	Rab11fip5	RAB11 family interacting protein 5 (class I) [Source:MGI Symbol;Acc:MGI:1098586]	1.08533	5.93407	48.6546	3.05245e-12	3.59338e-11
ENSMUSG00000023805	20975	Synj2	synaptojanin 2 [Source:MGI Symbol;Acc:MGI:1201671]	-1.13019	4.71064	48.6524	3.056e-12	3.59502e-11
ENSMUSG00000018761	24070	Mpdu1	mannose-P-dolichol utilization defect 1 [Source:MGI Symbol;Acc:MGI:1346040]	1.07596	5.94777	48.6286	3.09329e-12	3.63631e-11
ENSMUSG00000024811	74493	Tnks2	tankyrase, TRF1-interacting ankyrin-related ADP-ribose polymerase 2 [Source:MGI Symbol;Acc:MGI:1921743]	-1.03084	7.09995	48.6045	3.13144e-12	3.67856e-11
ENSMUSG00000022935	14805	Grik1	glutamate receptor, ionotropic, kainate 1 [Source:MGI Symbol;Acc:MGI:95814]	1.62387	4.58987	48.5883	3.15746e-12	3.70651e-11
ENSMUSG00000004455	19047	Ppp1cc	protein phosphatase 1, catalytic subunit, gamma isoform [Source:MGI Symbol;Acc:MGI:104872]	1.53248	1.82897	48.5852	3.16245e-12	3.70975e-11
ENSMUSG00000049907	68939	Rasl11b	RAS-like, family 11, member B [Source:MGI Symbol;Acc:MGI:1916189]	-1.19543	5.58825	48.5801	3.17067e-12	3.71676e-11
ENSMUSG00000006717	66834	Acot13	acyl-CoA thioesterase 13 [Source:MGI Symbol;Acc:MGI:1914084]	1.17132	6.95742	48.5739	3.18069e-12	3.72588e-11
ENSMUSG00000015501	15273	Hivep2	human immunodeficiency virus type I enhancer binding protein 2 [Source:MGI Symbol;Acc:MGI:1338076]	-1.21176	7.48739	48.5641	3.19664e-12	3.74193e-11
ENSMUSG00000047181	217125	Samd14	sterile alpha motif domain containing 14 [Source:MGI Symbol;Acc:MGI:2384945]	1.56836	3.33185	48.5567	3.20873e-12	3.75344e-11
ENSMUSG00000023262	109652	Acy1	aminoacylase 1 [Source:MGI Symbol;Acc:MGI:87913]	1.55224	3.6606	48.5505	3.21894e-12	3.76275e-11
ENSMUSG00000040717	171463	Il17rd	interleukin 17 receptor D [Source:MGI Symbol;Acc:MGI:2159727]	-2.38509	1.17929	48.5318	3.2497e-12	3.79604e-11
ENSMUSG00000071042	240168	Rasgrp3	RAS, guanyl releasing protein 3 [Source:MGI Symbol;Acc:MGI:3028579]	-1.93332	3.01494	48.5258	3.2597e-12	3.80505e-11
ENSMUSG00000035765	69190	Dym	dymeclin [Source:MGI Symbol;Acc:MGI:1918480]	1.14445	5.09576	48.5002	3.3025e-12	3.85003e-11
ENSMUSG00000056153	54607	Socs6	suppressor of cytokine signaling 6 [Source:MGI Symbol;Acc:MGI:1924885]	-1.07642	4.0775	48.5	3.30287e-12	3.85003e-11
ENSMUSG00000018293	18643	Pfn1	profilin 1 [Source:MGI Symbol;Acc:MGI:97549]	1.27626	6.73024	48.4866	3.3256e-12	3.87382e-11
ENSMUSG00000067367	17089	Lyar	Ly1 antibody reactive clone [Source:MGI Symbol;Acc:MGI:107470]	1.21163	2.80244	48.4478	3.39203e-12	3.94843e-11
ENSMUSG00000041377	29862	Ninj2	ninjurin 2 [Source:MGI Symbol;Acc:MGI:1352751]	-2.25621	2.8367	48.4349	3.41431e-12	3.96906e-11
ENSMUSG00000038175	218203	Mylip	myosin regulatory light chain interacting protein [Source:MGI Symbol;Acc:MGI:2388271]	-1.46825	3.8227	48.4348	3.41453e-12	3.96906e-11
ENSMUSG00000039989	12418	Cbx4	chromobox 4 [Source:MGI Symbol;Acc:MGI:1195985]	1.49639	4.67794	48.4066	3.46393e-12	4.02367e-11
ENSMUSG00000028251	77032	Tstd3	thiosulfate sulfurtransferase (rhodanese)-like domain containing 3 [Source:MGI Symbol;Acc:MGI:1924282]	1.31088	4.51035	48.3977	3.47985e-12	4.03934e-11
ENSMUSG00000022449	223838	Adamts20	a disintegrin-like and metallopeptidase (reprolysin type) with thrombospondin type 1 motif, 20 [Source:MGI Symbol;Acc:MGI:2660628]	-2.07551	2.57706	48.3796	3.51198e-12	4.07379e-11
ENSMUSG00000032380	13143	Dapk2	death-associated protein kinase 2 [Source:MGI Symbol;Acc:MGI:1341297]	-1.58248	1.81788	48.3749	3.52054e-12	4.08088e-11
ENSMUSG00000003873	12028	Bax	BCL2-associated X protein [Source:MGI Symbol;Acc:MGI:99702]	1.05521	5.59079	48.3593	3.54856e-12	4.1105e-11
ENSMUSG00000031934	55991	Panx1	pannexin 1 [Source:MGI Symbol;Acc:MGI:1860055]	1.21277	4.75279	48.352	3.56175e-12	4.12032e-11
ENSMUSG00000024070	75292	Prkd3	protein kinase D3 [Source:MGI Symbol;Acc:MGI:1922542]	-1.79407	4.67447	48.3519	3.56199e-12	4.12032e-11
ENSMUSG00000040794	67445	C1qtnf4	C1q and tumor necrosis factor related protein 4 [Source:MGI Symbol;Acc:MGI:1914695]	1.37363	3.37505	48.3374	3.58844e-12	4.14803e-11
ENSMUSG00000028480	384009	Glipr2	GLI pathogenesis-related 2 [Source:MGI Symbol;Acc:MGI:1917770]	-2.6234	1.348	48.309	3.64082e-12	4.20293e-11
ENSMUSG00000019194	20266	Scn1b	sodium channel, voltage-gated, type I, beta [Source:MGI Symbol;Acc:MGI:98247]	1.10487	5.97716	48.3089	3.64099e-12	4.20293e-11
ENSMUSG00000078648	NA	Gm17546	predicted gene, 17546 [Source:MGI Symbol;Acc:MGI:4937180]	2.77529	0.247864	48.3043	3.64949e-12	4.20982e-11
ENSMUSG00000044475	69090	Ascc1	activating signal cointegrator 1 complex subunit 1 [Source:MGI Symbol;Acc:MGI:1916340]	1.04486	4.77086	48.2629	3.72736e-12	4.29346e-11
ENSMUSG00000064370	17711	mt-Cytb	mitochondrially encoded cytochrome b [Source:MGI Symbol;Acc:MGI:102501]	-4.71325	14.3287	48.2626	3.7279e-12	4.29346e-11
ENSMUSG00000026596	11352	Abl2	v-abl Abelson murine leukemia viral oncogene 2 (arg, Abelson-related gene) [Source:MGI Symbol;Acc:MGI:87860]	-1.07941	6.11149	48.2605	3.73192e-12	4.29346e-11
ENSMUSG00000041629	28081	Fam104a	family with sequence similarity 104, member A [Source:MGI Symbol;Acc:MGI:106351]	1.12867	3.51538	48.2603	3.73232e-12	4.29346e-11
ENSMUSG00000090053	242481	Palm2	paralemmin 2 [Source:MGI Symbol;Acc:MGI:1934601]	-1.87606	2.17758	48.2421	3.76718e-12	4.33056e-11
ENSMUSG00000036196	224661	Slc26a8	solute carrier family 26, member 8 [Source:MGI Symbol;Acc:MGI:2385046]	-1.9119	1.47832	48.2329	3.78475e-12	4.34776e-11
ENSMUSG00000030270	211232	Cpne9	copine family member IX [Source:MGI Symbol;Acc:MGI:2443052]	-1.35306	4.70137	48.2192	3.8114e-12	4.37536e-11
ENSMUSG00000034000	241159	Neu4	sialidase 4 [Source:MGI Symbol;Acc:MGI:2661364]	-2.54707	3.65007	48.2033	3.84247e-12	4.40798e-11
ENSMUSG00000037843	277432	Vstm2l	V-set and transmembrane domain containing 2-like [Source:MGI Symbol;Acc:MGI:2685537]	1.69124	2.78039	48.1934	3.86191e-12	4.42722e-11
ENSMUSG00000041592	237979	Sdk2	sidekick cell adhesion molecule 2 [Source:MGI Symbol;Acc:MGI:2443847]	-1.51317	4.53715	48.1702	3.90776e-12	4.47669e-11
ENSMUSG00000006715	57441	Gmnn	geminin [Source:MGI Symbol;Acc:MGI:1927344]	1.28428	2.86126	48.1543	3.93957e-12	4.51003e-11
ENSMUSG00000087528	NA	9830144P21Rik	RIKEN cDNA 9830144P21 gene [Source:MGI Symbol;Acc:MGI:3041171]	-4.82837	1.1945	48.142	3.96442e-12	4.53536e-11
ENSMUSG00000041653	116939	Pnpla3	patatin-like phospholipase domain containing 3 [Source:MGI Symbol;Acc:MGI:2151796]	-2.20907	2.8127	48.1237	4.00159e-12	4.57474e-11
ENSMUSG00000029602	19415	Rasal1	RAS protein activator like 1 (GAP1 like) [Source:MGI Symbol;Acc:MGI:1330842]	-1.49397	4.33426	48.0781	4.09583e-12	4.67926e-11
ENSMUSG00000038305	67198	Spats2l	spermatogenesis associated, serine-rich 2-like [Source:MGI Symbol;Acc:MGI:1914448]	1.13104	5.28646	48.0513	4.15222e-12	4.74043e-11
ENSMUSG00000022747	54613	St3gal6	ST3 beta-galactoside alpha-2,3-sialyltransferase 6 [Source:MGI Symbol;Acc:MGI:1888707]	1.16591	3.99119	48.0427	4.17048e-12	4.758e-11
ENSMUSG00000027956	70652	Tmem144	transmembrane protein 144 [Source:MGI Symbol;Acc:MGI:1917902]	-1.72478	3.06742	48.041	4.17392e-12	4.75867e-11
ENSMUSG00000039552	212892	Rsph4a	radial spoke head 4 homolog A (Chlamydomonas) [Source:MGI Symbol;Acc:MGI:3027894]	-2.30085	0.935207	48.0243	4.20963e-12	4.79609e-11
ENSMUSG00000019471	12539	Cdc37	cell division cycle 37 [Source:MGI Symbol;Acc:MGI:109531]	1.24338	4.9979	48.0128	4.23453e-12	4.82116e-11
ENSMUSG00000030022	101401	Adamts9	a disintegrin-like and metallopeptidase (reprolysin type) with thrombospondin type 1 motif, 9 [Source:MGI Symbol;Acc:MGI:1916320]	-2.74511	0.837237	47.9925	4.2785e-12	4.86789e-11
ENSMUSG00000020220	230895	Vps13d	vacuolar protein sorting 13D [Source:MGI Symbol;Acc:MGI:2448530]	-1.01474	5.586	47.9856	4.29361e-12	4.88174e-11
ENSMUSG00000050912	71929	Tmem123	transmembrane protein 123 [Source:MGI Symbol;Acc:MGI:1919179]	-1.76854	3.33935	47.9594	4.35141e-12	4.94408e-11
ENSMUSG00000021040	NA	Slirp	SRA stem-loop interacting RNA binding protein [Source:MGI Symbol;Acc:MGI:1916394]	1.50757	6.34103	47.953	4.36551e-12	4.95671e-11
ENSMUSG00000033585	17984	Ndn	necdin [Source:MGI Symbol;Acc:MGI:97290]	1.15825	7.24037	47.9375	4.40028e-12	4.99278e-11
ENSMUSG00000031596	11988	Slc7a2	solute carrier family 7 (cationic amino acid transporter, y+ system), member 2 [Source:MGI Symbol;Acc:MGI:99828]	-2.27229	4.02152	47.9256	4.42713e-12	5.01982e-11
ENSMUSG00000052364	NA	B630019K06Rik	RIKEN cDNA B630019K06 gene [Source:MGI Symbol;Acc:MGI:2147918]	1.40609	4.68049	47.8901	4.50793e-12	5.10796e-11
ENSMUSG00000019890	67405	Nts	neurotensin [Source:MGI Symbol;Acc:MGI:1328351]	2.12332	4.86176	47.8853	4.51897e-12	5.11699e-11
ENSMUSG00000032702	107351	Kank1	KN motif and ankyrin repeat domains 1 [Source:MGI Symbol;Acc:MGI:2147707]	-2.28325	4.4543	47.8657	4.56434e-12	5.16485e-11
ENSMUSG00000021115	22367	Vrk1	vaccinia related kinase 1 [Source:MGI Symbol;Acc:MGI:1261847]	0.959592	4.21147	47.8617	4.5738e-12	5.17203e-11
ENSMUSG00000096954	NA	Gdap10	ganglioside-induced differentiation-associated-protein 10 [Source:MGI Symbol;Acc:MGI:1338008]	-4.56941	2.06191	47.8566	4.58561e-12	5.18187e-11
ENSMUSG00000020715	78943	Ern1	endoplasmic reticulum (ER) to nucleus signalling 1 [Source:MGI Symbol;Acc:MGI:1930134]	-1.48919	2.1417	47.8441	4.61487e-12	5.21139e-11
ENSMUSG00000036817	77053	Sun1	Sad1 and UNC84 domain containing 1 [Source:MGI Symbol;Acc:MGI:1924303]	-1.23981	6.78083	47.8252	4.65965e-12	5.25839e-11
ENSMUSG00000036186	56279	Fam69b	family with sequence similarity 69, member B [Source:MGI Symbol;Acc:MGI:1927576]	1.2055	6.07763	47.7909	4.74196e-12	5.34764e-11
ENSMUSG00000024955	26379	Esrra	estrogen related receptor, alpha [Source:MGI Symbol;Acc:MGI:1346831]	1.55185	1.68898	47.7717	4.78851e-12	5.39648e-11
ENSMUSG00000030854	19259	Ptpn5	protein tyrosine phosphatase, non-receptor type 5 [Source:MGI Symbol;Acc:MGI:97807]	1.08768	7.83607	47.7679	4.79774e-12	5.40042e-11
ENSMUSG00000053025	64176	Sv2b	synaptic vesicle glycoprotein 2 b [Source:MGI Symbol;Acc:MGI:1927338]	-2.15767	8.67606	47.7676	4.7985e-12	5.40042e-11
ENSMUSG00000039313	209743	AF529169	cDNA sequence AF529169 [Source:MGI Symbol;Acc:MGI:2667167]	1.63216	2.27255	47.7635	4.80857e-12	5.40809e-11
ENSMUSG00000070697	65961	Utp3	UTP3 small subunit processome component [Source:MGI Symbol;Acc:MGI:1919230]	0.972393	4.98719	47.7401	4.86633e-12	5.46936e-11
ENSMUSG00000005973	19672	Rcn1	reticulocalbin 1 [Source:MGI Symbol;Acc:MGI:104559]	1.20626	4.76908	47.6953	4.97886e-12	5.59205e-11
ENSMUSG00000075376	319817	Rc3h2	ring finger and CCCH-type zinc finger domains 2 [Source:MGI Symbol;Acc:MGI:2442789]	-0.978697	6.44924	47.6146	5.18806e-12	5.82309e-11
ENSMUSG00000032051	14148	Fdx1	ferredoxin 1 [Source:MGI Symbol;Acc:MGI:103224]	1.29575	2.67245	47.6076	5.20671e-12	5.84008e-11
ENSMUSG00000033904	101565	Ccp110	centriolar coiled coil protein 110 [Source:MGI Symbol;Acc:MGI:2141942]	-1.17641	5.32578	47.6035	5.21745e-12	5.84818e-11
ENSMUSG00000038764	545622	Ptpn3	protein tyrosine phosphatase, non-receptor type 3 [Source:MGI Symbol;Acc:MGI:105307]	-1.56925	4.78851	47.5968	5.23537e-12	5.86432e-11
ENSMUSG00000092492	NA	B230208B08Rik	RIKEN cDNA B230208B08 gene [Source:MGI Symbol;Acc:MGI:2442149]	-3.03836	-0.108443	47.5848	5.26765e-12	5.8965e-11
ENSMUSG00000030527	70461	Crtc3	CREB regulated transcription coactivator 3 [Source:MGI Symbol;Acc:MGI:1917711]	-1.13725	3.52771	47.5543	5.35007e-12	5.98239e-11
ENSMUSG00000029832	18025	Nfe2l3	nuclear factor, erythroid derived 2, like 3 [Source:MGI Symbol;Acc:MGI:1339958]	-1.95163	2.01802	47.5538	5.35162e-12	5.98239e-11
ENSMUSG00000078963	66255	Hsbp1l1	heat shock factor binding protein 1-like 1 [Source:MGI Symbol;Acc:MGI:1913505]	1.70893	2.60876	47.5502	5.3613e-12	5.98239e-11
ENSMUSG00000020546	20913	Stxbp4	syntaxin binding protein 4 [Source:MGI Symbol;Acc:MGI:1342296]	-1.12302	4.92425	47.55	5.36188e-12	5.98239e-11
ENSMUSG00000028329	22590	Xpa	xeroderma pigmentosum, complementation group A [Source:MGI Symbol;Acc:MGI:99135]	1.34647	2.99804	47.5498	5.36236e-12	5.98239e-11
ENSMUSG00000031994	30806	Adamts8	a disintegrin-like and metallopeptidase (reprolysin type) with thrombospondin type 1 motif, 8 [Source:MGI Symbol;Acc:MGI:1353468]	1.8391	3.52593	47.52	5.44462e-12	6.0701e-11
ENSMUSG00000063796	19879	Slc22a8	solute carrier family 22 (organic anion transporter), member 8 [Source:MGI Symbol;Acc:MGI:1336187]	-2.65337	3.33558	47.5175	5.45143e-12	6.07361e-11
ENSMUSG00000020080	216019	Hkdc1	hexokinase domain containing 1 [Source:MGI Symbol;Acc:MGI:2384910]	-2.13209	2.65789	47.4621	5.60771e-12	6.24355e-11
ENSMUSG00000006498	19205	Ptbp1	polypyrimidine tract binding protein 1 [Source:MGI Symbol;Acc:MGI:97791]	-1.60006	2.3784	47.4529	5.63422e-12	6.26887e-11
ENSMUSG00000034993	26949	Vat1	vesicle amine transport 1 [Source:MGI Symbol;Acc:MGI:1349450]	1.71447	3.57728	47.4499	5.64267e-12	6.27408e-11
ENSMUSG00000039737	66801	Prkrip1	Prkr interacting protein 1 (IL11 inducible) [Source:MGI Symbol;Acc:MGI:1914051]	0.843761	4.73157	47.4317	5.69548e-12	6.32856e-11
ENSMUSG00000049985	77318	Ankrd55	ankyrin repeat domain 55 [Source:MGI Symbol;Acc:MGI:1924568]	2.088	1.88422	47.421	5.72669e-12	6.359e-11
ENSMUSG00000026817	11636	Ak1	adenylate kinase 1 [Source:MGI Symbol;Acc:MGI:87977]	1.16315	6.49908	47.4156	5.74227e-12	6.37204e-11
ENSMUSG00000047649	70333	Cd3eap	CD3E antigen, epsilon polypeptide associated protein [Source:MGI Symbol;Acc:MGI:1917583]	0.942245	4.88957	47.4137	5.748e-12	6.37415e-11
ENSMUSG00000027952	68603	Pmvk	phosphomevalonate kinase [Source:MGI Symbol;Acc:MGI:1915853]	0.941611	6.56828	47.3808	5.84517e-12	6.47758e-11
ENSMUSG00000023235	20300	Ccl25	chemokine (C-C motif) ligand 25 [Source:MGI Symbol;Acc:MGI:1099448]	1.1657	3.95061	47.3755	5.86111e-12	6.49093e-11
ENSMUSG00000046731	216858	Kctd11	potassium channel tetramerisation domain containing 11 [Source:MGI Symbol;Acc:MGI:2448712]	-2.21961	0.734425	47.3402	5.9675e-12	6.60435e-11
ENSMUSG00000029642	20018	Polr1d	polymerase (RNA) I polypeptide D [Source:MGI Symbol;Acc:MGI:108403]	1.02569	5.66439	47.3266	6.00903e-12	6.64589e-11
ENSMUSG00000061518	12859	Cox5b	cytochrome c oxidase subunit Vb [Source:MGI Symbol;Acc:MGI:88475]	1.68539	6.68801	47.2925	6.1146e-12	6.75816e-11
ENSMUSG00000014294	17991	Ndufa2	NADH dehydrogenase (ubiquinone) 1 alpha subcomplex, 2 [Source:MGI Symbol;Acc:MGI:1343103]	1.67442	8.46252	47.2882	6.12791e-12	6.76837e-11
ENSMUSG00000027848	99543	Olfml3	olfactomedin-like 3 [Source:MGI Symbol;Acc:MGI:1914877]	-1.90503	5.02428	47.2578	6.22378e-12	6.8697e-11
ENSMUSG00000030790	11535	Adm	adrenomedullin [Source:MGI Symbol;Acc:MGI:108058]	1.89553	1.70369	47.2559	6.22976e-12	6.87174e-11
ENSMUSG00000064302	76707	Clasp1	CLIP associating protein 1 [Source:MGI Symbol;Acc:MGI:1923957]	-0.979276	5.62443	47.208	6.38385e-12	7.03705e-11
ENSMUSG00000022176	140743	Rem2	rad and gem related GTP binding protein 2 [Source:MGI Symbol;Acc:MGI:2155260]	1.7788	1.96643	47.2058	6.39119e-12	7.04047e-11
ENSMUSG00000019066	19340	Rab3d	RAB3D, member RAS oncogene family [Source:MGI Symbol;Acc:MGI:97844]	-1.30612	3.13485	47.193	6.43314e-12	7.08199e-11
ENSMUSG00000021520	67530	Uqcrb	ubiquinol-cytochrome c reductase binding protein [Source:MGI Symbol;Acc:MGI:1914780]	1.64494	7.56051	47.1599	6.54249e-12	7.1976e-11
ENSMUSG00000023971	224823	Rrp36	ribosomal RNA processing 36 homolog (S. cerevisiae) [Source:MGI Symbol;Acc:MGI:2385053]	1.1022	3.36405	47.1576	6.5501e-12	7.20122e-11
ENSMUSG00000045752	56844	Tssc4	tumor-suppressing subchromosomal transferable fragment 4 [Source:MGI Symbol;Acc:MGI:1861712]	1.09416	3.97936	47.1482	6.58186e-12	7.23135e-11
ENSMUSG00000032171	23988	Pin1	protein (peptidyl-prolyl cis/trans isomerase) NIMA-interacting 1 [Source:MGI Symbol;Acc:MGI:1346036]	1.0345	5.7922	47.1366	6.62085e-12	7.26939e-11
ENSMUSG00000031639	142980	Tlr3	toll-like receptor 3 [Source:MGI Symbol;Acc:MGI:2156367]	-2.364	3.07848	47.1347	6.62726e-12	7.27162e-11
ENSMUSG00000022206	18162	Npr3	natriuretic peptide receptor 3 [Source:MGI Symbol;Acc:MGI:97373]	-2.13589	2.22423	47.1233	6.66602e-12	7.30933e-11
ENSMUSG00000052229	574402	Gpr17	G protein-coupled receptor 17 [Source:MGI Symbol;Acc:MGI:3584514]	-2.26549	5.50457	47.0988	6.74975e-12	7.39264e-11
ENSMUSG00000030287	16439	Itpr2	inositol 1,4,5-triphosphate receptor 2 [Source:MGI Symbol;Acc:MGI:99418]	-2.18323	5.31429	47.0985	6.75088e-12	7.39264e-11
ENSMUSG00000041199	106707	Rpusd1	RNA pseudouridylate synthase domain containing 1 [Source:MGI Symbol;Acc:MGI:1919186]	0.880589	4.75467	47.0923	6.77221e-12	7.41111e-11
ENSMUSG00000021748	68263	Pdhb	pyruvate dehydrogenase (lipoamide) beta [Source:MGI Symbol;Acc:MGI:1915513]	1.13097	7.68224	47.0905	6.77822e-12	7.41281e-11
ENSMUSG00000044712	625098	Slc38a6	solute carrier family 38, member 6 [Source:MGI Symbol;Acc:MGI:3648156]	-2.54362	2.31239	47.0848	6.79819e-12	7.42977e-11
ENSMUSG00000096914	270049	Galntl6	UDP-N-acetyl-alpha-D-galactosamine:polypeptide N-acetylgalactosaminyltransferase-like 6 [Source:MGI Symbol;Acc:MGI:1913581]	1.7455	4.03384	47.0727	6.84036e-12	7.47094e-11
ENSMUSG00000063446	272031	Plppr1	phospholipid phosphatase related 1 [Source:MGI Symbol;Acc:MGI:2445015]	1.6897	4.21277	47.0641	6.87031e-12	7.49873e-11
ENSMUSG00000026888	50915	Grb14	growth factor receptor bound protein 14 [Source:MGI Symbol;Acc:MGI:1355324]	-1.37924	6.15767	47.0607	6.88235e-12	7.50696e-11
ENSMUSG00000022193	19173	Psmb5	proteasome (prosome, macropain) subunit, beta type 5 [Source:MGI Symbol;Acc:MGI:1194513]	1.07349	4.96372	47.0479	6.92717e-12	7.5474e-11
ENSMUSG00000009863	67680	Sdhb	succinate dehydrogenase complex, subunit B, iron sulfur (Ip) [Source:MGI Symbol;Acc:MGI:1914930]	1.1671	8.47732	47.047	6.93048e-12	7.5474e-11
ENSMUSG00000020308	110012	Tpgs1	tubulin polyglutamylase complex subunit 1 [Source:MGI Symbol;Acc:MGI:106618]	1.21518	4.06788	47.0463	6.93304e-12	7.5474e-11
ENSMUSG00000021371	76137	Mcur1	mitochondrial calcium uniporter regulator 1 [Source:MGI Symbol;Acc:MGI:1923387]	-2.00756	4.56493	47.021	7.02289e-12	7.6402e-11
ENSMUSG00000029001	230903	Fbxo44	F-box protein 44 [Source:MGI Symbol;Acc:MGI:1354744]	0.860334	6.59684	47.0142	7.04732e-12	7.66178e-11
ENSMUSG00000072982	NA	9230009I02Rik	RIKEN cDNA 9230009I02 gene [Source:MGI Symbol;Acc:MGI:3588229]	2.58151	-0.124415	46.987	7.14577e-12	7.76374e-11
ENSMUSG00000040818	211922	Dennd6a	DENN/MADD domain containing 6A [Source:MGI Symbol;Acc:MGI:2442980]	-0.972613	3.85006	46.9657	7.22383e-12	7.84342e-11
ENSMUSG00000047953	14729	Gp5	glycoprotein 5 (platelet) [Source:MGI Symbol;Acc:MGI:1096363]	2.20597	-0.219561	46.961	7.24136e-12	7.85732e-11
ENSMUSG00000052372	331461	Il1rapl1	interleukin 1 receptor accessory protein-like 1 [Source:MGI Symbol;Acc:MGI:2687319]	-1.36834	4.99973	46.955	7.26336e-12	7.87606e-11
ENSMUSG00000056665	223626	Them6	thioesterase superfamily member 6 [Source:MGI Symbol;Acc:MGI:1925301]	1.46219	1.83556	46.9084	7.43842e-12	8.06063e-11
ENSMUSG00000033966	381113	Cdkl4	cyclin-dependent kinase-like 4 [Source:MGI Symbol;Acc:MGI:3587025]	-1.53108	3.95159	46.8215	7.77551e-12	8.42043e-11
ENSMUSG00000028476	53614	Reck	reversion-inducing-cysteine-rich protein with kazal motifs [Source:MGI Symbol;Acc:MGI:1855698]	-2.32042	2.03388	46.8138	7.80615e-12	8.44812e-11
ENSMUSG00000057315	231532	Arhgap24	Rho GTPase activating protein 24 [Source:MGI Symbol;Acc:MGI:1922647]	1.37365	3.03484	46.7945	7.88344e-12	8.52621e-11
ENSMUSG00000037188	230824	Grhl3	grainyhead-like 3 (Drosophila) [Source:MGI Symbol;Acc:MGI:2655333]	2.10533	0.59038	46.7849	7.9223e-12	8.56267e-11
ENSMUSG00000053453	66231	Thoc7	THO complex 7 [Source:MGI Symbol;Acc:MGI:1913481]	1.02635	5.80681	46.78	7.94208e-12	8.57848e-11
ENSMUSG00000021917	69019	Spcs1	signal peptidase complex subunit 1 homolog (S. cerevisiae) [Source:MGI Symbol;Acc:MGI:1916269]	1.24145	8.15798	46.7587	8.02864e-12	8.66634e-11
ENSMUSG00000037533	192786	Rapgef6	Rap guanine nucleotide exchange factor (GEF) 6 [Source:MGI Symbol;Acc:MGI:2384761]	-1.21278	4.87663	46.7333	8.13355e-12	8.77389e-11
ENSMUSG00000076437	72657	Selenoh	selenoprotein H [Source:MGI Symbol;Acc:MGI:1919907]	1.15625	4.2541	46.7243	8.17103e-12	8.80861e-11
ENSMUSG00000041660	170442	Bbox1	butyrobetaine (gamma), 2-oxoglutarate dioxygenase 1 (gamma-butyrobetaine hydroxylase) [Source:MGI Symbol;Acc:MGI:1891372]	-3.63857	0.580586	46.6784	8.36469e-12	9.01155e-11
ENSMUSG00000046186	235505	Cd109	CD109 antigen [Source:MGI Symbol;Acc:MGI:2445221]	-2.81299	0.95411	46.6695	8.40253e-12	9.04645e-11
ENSMUSG00000031198	67391	Fundc2	FUN14 domain containing 2 [Source:MGI Symbol;Acc:MGI:1914641]	1.20051	6.73927	46.6637	8.4274e-12	9.06736e-11
ENSMUSG00000029134	665270	Plb1	phospholipase B1 [Source:MGI Symbol;Acc:MGI:1922406]	-1.94898	2.80702	46.6497	8.48785e-12	9.1265e-11
ENSMUSG00000050272	13508	Dscam	DS cell adhesion molecule [Source:MGI Symbol;Acc:MGI:1196281]	-1.06893	5.79666	46.6385	8.53681e-12	9.17321e-11
ENSMUSG00000038046	67390	Mrm3	mitochondrial rRNA methyltransferase 3 [Source:MGI Symbol;Acc:MGI:1914640]	1.26802	2.72087	46.6008	8.70249e-12	9.3452e-11
ENSMUSG00000050944	319634	Efcab5	EF-hand calcium binding domain 5 [Source:MGI Symbol;Acc:MGI:2442440]	-2.0878	1.76097	46.5821	8.786e-12	9.42879e-11
ENSMUSG00000068037	17171	Mas1	MAS1 oncogene [Source:MGI Symbol;Acc:MGI:96918]	-1.67847	4.72147	46.5743	8.82076e-12	9.4565e-11
ENSMUSG00000048355	76219	Arxes1	adipocyte-related X-chromosome expressed sequence 1 [Source:MGI Symbol;Acc:MGI:1923469]	1.12205	5.96194	46.5738	8.82318e-12	9.4565e-11
ENSMUSG00000022122	13618	Ednrb	endothelin receptor type B [Source:MGI Symbol;Acc:MGI:102720]	-2.41305	6.22853	46.5391	8.98064e-12	9.61906e-11
ENSMUSG00000028271	229906	Gtf2b	general transcription factor IIB [Source:MGI Symbol;Acc:MGI:2385191]	0.924525	5.41718	46.5282	9.03102e-12	9.6668e-11
ENSMUSG00000037818	269423	Abhd18	abhydrolase domain containing 18 [Source:MGI Symbol;Acc:MGI:1915468]	-1.21517	3.59051	46.524	9.05025e-12	9.68114e-11
ENSMUSG00000031960	234734	Aars	alanyl-tRNA synthetase [Source:MGI Symbol;Acc:MGI:2384560]	1.09877	7.41041	46.5189	9.07395e-12	9.70027e-11
ENSMUSG00000027555	71934	Car13	carbonic anhydrase 13 [Source:MGI Symbol;Acc:MGI:1931322]	-3.26739	0.144603	46.4754	9.27775e-12	9.91176e-11
ENSMUSG00000049643	66367	2310022A10Rik	RIKEN cDNA 2310022A10 gene [Source:MGI Symbol;Acc:MGI:1913617]	1.05019	3.68387	46.468	9.31272e-12	9.94274e-11
ENSMUSG00000034248	67712	Slc25a37	solute carrier family 25, member 37 [Source:MGI Symbol;Acc:MGI:1914962]	-1.23707	4.47751	46.4536	9.3816e-12	1.00098e-10
ENSMUSG00000036990	73945	Otud4	OTU domain containing 4 [Source:MGI Symbol;Acc:MGI:1098801]	-1.00714	4.76155	46.4499	9.39916e-12	1.00222e-10
ENSMUSG00000034192	67678	Lsm3	LSM3 homolog, U6 small nuclear RNA and mRNA degradation associated [Source:MGI Symbol;Acc:MGI:1914928]	1.29495	5.63649	46.4352	9.4699e-12	1.00911e-10
ENSMUSG00000019899	16773	Lama2	laminin, alpha 2 [Source:MGI Symbol;Acc:MGI:99912]	-2.08631	2.90853	46.4303	9.49337e-12	1.01097e-10
ENSMUSG00000053550	232813	Shisa7	shisa family member 7 [Source:MGI Symbol;Acc:MGI:3605641]	-1.17281	6.52192	46.4272	9.50852e-12	1.01193e-10
ENSMUSG00000042707	75563	Dnali1	dynein, axonemal, light intermediate polypeptide 1 [Source:MGI Symbol;Acc:MGI:1922813]	-3.01272	-0.47233	46.4097	9.59413e-12	1.02039e-10
ENSMUSG00000017376	18099	Nlk	nemo like kinase [Source:MGI Symbol;Acc:MGI:1201387]	-0.882899	6.85849	46.3858	9.71151e-12	1.03221e-10
ENSMUSG00000022370	68537	Mrpl13	mitochondrial ribosomal protein L13 [Source:MGI Symbol;Acc:MGI:2137218]	1.21645	6.13898	46.3668	9.8063e-12	1.04162e-10
ENSMUSG00000021548	66671	Ccnh	cyclin H [Source:MGI Symbol;Acc:MGI:1913921]	0.999715	6.23489	46.3385	9.94877e-12	1.05608e-10
ENSMUSG00000079508	68316	Apoo	apolipoprotein O [Source:MGI Symbol;Acc:MGI:1915566]	1.25477	3.41861	46.2833	1.02333e-11	1.08559e-10
ENSMUSG00000014226	12301	Cacybp	calcyclin binding protein [Source:MGI Symbol;Acc:MGI:1270839]	0.958609	6.57759	46.2712	1.02966e-11	1.09162e-10
ENSMUSG00000020363	14584	Gfpt2	glutamine fructose-6-phosphate transaminase 2 [Source:MGI Symbol;Acc:MGI:1338883]	1.36239	3.8359	46.2679	1.03141e-11	1.09277e-10
ENSMUSG00000034161	20289	Scx	scleraxis [Source:MGI Symbol;Acc:MGI:102934]	2.79544	-0.471241	46.2656	1.03259e-11	1.09332e-10
ENSMUSG00000037653	243043	Kctd8	potassium channel tetramerisation domain containing 8 [Source:MGI Symbol;Acc:MGI:2443804]	1.53976	3.81263	46.2612	1.03492e-11	1.09483e-10
ENSMUSG00000031425	18823	Plp1	proteolipid protein (myelin) 1 [Source:MGI Symbol;Acc:MGI:97623]	-2.87837	12.4276	46.2604	1.03533e-11	1.09483e-10
ENSMUSG00000024109	18189	Nrxn1	neurexin I [Source:MGI Symbol;Acc:MGI:1096391]	-1.39274	10.4147	46.2545	1.03847e-11	1.09745e-10
ENSMUSG00000050064	242109	Zfp697	zinc finger protein 697 [Source:MGI Symbol;Acc:MGI:2139736]	-1.33958	3.96109	46.2497	1.04105e-11	1.09948e-10
ENSMUSG00000092417	81845	Gpank1	G patch domain and ankyrin repeats 1 [Source:MGI Symbol;Acc:MGI:2148975]	1.44519	2.94656	46.2082	1.06333e-11	1.1223e-10
ENSMUSG00000044033	545428	Ccdc141	coiled-coil domain containing 141 [Source:MGI Symbol;Acc:MGI:1919735]	-2.04404	3.68305	46.2007	1.06739e-11	1.12587e-10
ENSMUSG00000038000	497652	Acd	adrenocortical dysplasia [Source:MGI Symbol;Acc:MGI:87873]	0.945437	5.19392	46.1926	1.07182e-11	1.12941e-10
ENSMUSG00000020962	83602	Gtf2a1	general transcription factor II A, 1 [Source:MGI Symbol;Acc:MGI:1933277]	-1.16112	5.17923	46.1921	1.0721e-11	1.12941e-10
ENSMUSG00000051278	71643	Zgrf1	zinc finger, GRF-type containing 1 [Source:MGI Symbol;Acc:MGI:1918893]	-2.52438	1.78303	46.1285	1.10748e-11	1.16594e-10
ENSMUSG00000017868	27219	Sgk2	serum/glucocorticoid regulated kinase 2 [Source:MGI Symbol;Acc:MGI:1351318]	-2.38647	2.01145	46.1245	1.10969e-11	1.16753e-10
ENSMUSG00000023791	72084	Pigx	phosphatidylinositol glycan anchor biosynthesis, class X [Source:MGI Symbol;Acc:MGI:1919334]	1.13477	4.07562	46.1186	1.11307e-11	1.16977e-10
ENSMUSG00000020775	60441	Mrpl38	mitochondrial ribosomal protein L38 [Source:MGI Symbol;Acc:MGI:1926269]	0.997566	4.51423	46.1183	1.11323e-11	1.16977e-10
ENSMUSG00000037892	73173	Pcdh18	protocadherin 18 [Source:MGI Symbol;Acc:MGI:1920423]	1.54908	3.72999	46.1165	1.11426e-11	1.17011e-10
ENSMUSG00000039114	68404	Nrn1	neuritin 1 [Source:MGI Symbol;Acc:MGI:1915654]	-2.39704	7.62459	46.1137	1.11584e-11	1.17103e-10
ENSMUSG00000097545	NA	Mir124a-1hg	Mir124-1 host gene (non-protein coding) [Source:MGI Symbol;Acc:MGI:2442197]	-3.4368	5.29292	46.0828	1.13362e-11	1.18894e-10
ENSMUSG00000050121	226115	Opalin	oligodendrocytic myelin paranodal and inner loop protein [Source:MGI Symbol;Acc:MGI:2657025]	-2.40767	5.84813	46.078	1.1364e-11	1.1911e-10
ENSMUSG00000029202	71521	Pds5a	PDS5 cohesin associated factor A [Source:MGI Symbol;Acc:MGI:1918771]	-1.39411	3.13204	46.0193	1.17093e-11	1.22653e-10
ENSMUSG00000006219	74202	Fblim1	filamin binding LIM protein 1 [Source:MGI Symbol;Acc:MGI:1921452]	2.08843	1.60488	45.9553	1.20979e-11	1.26644e-10
ENSMUSG00000049489	69109	Fam58b	family with sequence similarity 58, member B [Source:MGI Symbol;Acc:MGI:1916359]	1.11963	3.579	45.9402	1.21916e-11	1.27544e-10
ENSMUSG00000020218	24117	Wif1	Wnt inhibitory factor 1 [Source:MGI Symbol;Acc:MGI:1344332]	2.61951	1.75348	45.9233	1.22974e-11	1.2857e-10
ENSMUSG00000064367	17721	mt-Nd5	mitochondrially encoded NADH dehydrogenase 5 [Source:MGI Symbol;Acc:MGI:102496]	-4.28316	12.1769	45.9211	1.23112e-11	1.28633e-10
ENSMUSG00000055044	54132	Pdlim1	PDZ and LIM domain 1 (elfin) [Source:MGI Symbol;Acc:MGI:1860611]	-2.03919	2.31477	45.8639	1.26761e-11	1.32363e-10
ENSMUSG00000046743	329628	Fat4	FAT atypical cadherin 4 [Source:MGI Symbol;Acc:MGI:3045256]	-1.59865	2.79605	45.8579	1.27153e-11	1.32689e-10
ENSMUSG00000033335	13430	Dnm2	dynamin 2 [Source:MGI Symbol;Acc:MGI:109547]	-1.59457	3.3278	45.8523	1.27515e-11	1.32983e-10
ENSMUSG00000019846	16775	Lama4	laminin, alpha 4 [Source:MGI Symbol;Acc:MGI:109321]	-1.77915	2.66062	45.8398	1.28329e-11	1.33749e-10
ENSMUSG00000013622	381629	Atraid	all-trans retinoic acid induced differentiation factor [Source:MGI Symbol;Acc:MGI:1918918]	1.04043	6.87637	45.8338	1.28722e-11	1.34074e-10
ENSMUSG00000002820	235040	Atg4d	autophagy related 4D, cysteine peptidase [Source:MGI Symbol;Acc:MGI:2444308]	1.30072	2.40835	45.8272	1.29158e-11	1.34444e-10
ENSMUSG00000035835	216152	Plppr3	phospholipid phosphatase related 3 [Source:MGI Symbol;Acc:MGI:2388640]	1.36771	3.14139	45.7941	1.31361e-11	1.36652e-10
ENSMUSG00000049265	16527	Kcnk3	potassium channel, subfamily K, member 3 [Source:MGI Symbol;Acc:MGI:1100509]	1.21233	4.92186	45.7906	1.31592e-11	1.36806e-10
ENSMUSG00000034203	72170	Chchd4	coiled-coil-helix-coiled-coil-helix domain containing 4 [Source:MGI Symbol;Acc:MGI:1919420]	1.12647	5.43907	45.7869	1.31844e-11	1.36983e-10
ENSMUSG00000021364	54326	Elovl2	elongation of very long chain fatty acids (FEN1/Elo2, SUR4/Elo3, yeast)-like 2 [Source:MGI Symbol;Acc:MGI:1858960]	-2.11339	4.53945	45.7789	1.32382e-11	1.37456e-10
ENSMUSG00000075284	215280	Wipf1	WAS/WASL interacting protein family, member 1 [Source:MGI Symbol;Acc:MGI:2178801]	-1.68538	4.16051	45.7764	1.32549e-11	1.37543e-10
ENSMUSG00000059173	18573	Pde1a	phosphodiesterase 1A, calmodulin-dependent [Source:MGI Symbol;Acc:MGI:1201792]	-1.55687	7.53319	45.7721	1.32844e-11	1.37764e-10
ENSMUSG00000040043	56516	Rbms2	RNA binding motif, single stranded interacting protein 2 [Source:MGI Symbol;Acc:MGI:1861776]	-1.38159	3.61812	45.7575	1.33834e-11	1.38703e-10
ENSMUSG00000057182	20269	Scn3a	sodium channel, voltage-gated, type III, alpha [Source:MGI Symbol;Acc:MGI:98249]	-1.19347	6.514	45.7371	1.35239e-11	1.40073e-10
ENSMUSG00000013089	104156	Etv5	ets variant 5 [Source:MGI Symbol;Acc:MGI:1096867]	-0.88285	5.86772	45.7261	1.35997e-11	1.4077e-10
ENSMUSG00000061315	17938	Naca	nascent polypeptide-associated complex alpha polypeptide [Source:MGI Symbol;Acc:MGI:106095]	0.97931	5.17306	45.7172	1.36619e-11	1.41247e-10
ENSMUSG00000096472	12581	Cdkn2d	cyclin-dependent kinase inhibitor 2D (p19, inhibits CDK4) [Source:MGI Symbol;Acc:MGI:105387]	0.953612	6.27544	45.7171	1.36628e-11	1.41247e-10
ENSMUSG00000097267	NA	1700109K24Rik	RIKEN cDNA 1700109K24 gene [Source:MGI Symbol;Acc:MGI:1921553]	-4.15593	-0.266537	45.7125	1.36945e-11	1.41487e-10
ENSMUSG00000028609	17149	Magoh	mago homolog, exon junction complex core component [Source:MGI Symbol;Acc:MGI:1330312]	1.08037	5.34953	45.7056	1.37426e-11	1.41896e-10
ENSMUSG00000043008	239743	Klhl6	kelch-like 6 [Source:MGI Symbol;Acc:MGI:2686922]	-2.46378	2.07291	45.7035	1.37577e-11	1.41964e-10
ENSMUSG00000019578	66530	Ubxn6	UBX domain protein 6 [Source:MGI Symbol;Acc:MGI:1913780]	1.21988	5.58121	45.6772	1.39439e-11	1.43796e-10
ENSMUSG00000027315	20732	Spint1	serine protease inhibitor, Kunitz type 1 [Source:MGI Symbol;Acc:MGI:1338033]	1.98967	2.22774	45.6747	1.39612e-11	1.43885e-10
ENSMUSG00000058761	108937	Rnf169	ring finger protein 169 [Source:MGI Symbol;Acc:MGI:1920257]	-0.89069	5.47368	45.6698	1.39966e-11	1.44161e-10
ENSMUSG00000007817	328365	Zmiz1	zinc finger, MIZ-type containing 1 [Source:MGI Symbol;Acc:MGI:3040693]	-0.866892	6.33486	45.6588	1.40754e-11	1.44882e-10
ENSMUSG00000029647	72587	Pan3	PAN3 poly(A) specific ribonuclease subunit [Source:MGI Symbol;Acc:MGI:1919837]	-1.57997	5.63178	45.6434	1.41864e-11	1.45935e-10
ENSMUSG00000073154	NA	9330158H04Rik	RIKEN cDNA 9330158H04 gene [Source:MGI Symbol;Acc:MGI:2442094]	1.62837	1.61204	45.6233	1.43328e-11	1.4735e-10
ENSMUSG00000009470	238799	Tnpo1	transportin 1 [Source:MGI Symbol;Acc:MGI:2681523]	-1.66771	5.53601	45.6106	1.44259e-11	1.48215e-10
ENSMUSG00000036943	235442	Rab8b	RAB8B, member RAS oncogene family [Source:MGI Symbol;Acc:MGI:2442982]	-1.03519	4.75774	45.6074	1.44494e-11	1.48305e-10
ENSMUSG00000009640	66233	Dmap1	DNA methyltransferase 1-associated protein 1 [Source:MGI Symbol;Acc:MGI:1913483]	1.26471	3.44569	45.607	1.44525e-11	1.48305e-10
ENSMUSG00000003549	13870	Ercc1	excision repair cross-complementing rodent repair deficiency, complementation group 1 [Source:MGI Symbol;Acc:MGI:95412]	0.959638	4.17558	45.5971	1.45259e-11	1.48967e-10
ENSMUSG00000029463	68948	Fam216a	family with sequence similarity 216, member A [Source:MGI Symbol;Acc:MGI:1916198]	1.35481	3.99259	45.5928	1.45579e-11	1.49203e-10
ENSMUSG00000029919	54486	Hpgds	hematopoietic prostaglandin D synthase [Source:MGI Symbol;Acc:MGI:1859384]	-1.78231	4.16413	45.5732	1.4704e-11	1.50607e-10
ENSMUSG00000029090	70693	Adgra3	adhesion G protein-coupled receptor A3 [Source:MGI Symbol;Acc:MGI:1917943]	0.982547	4.77607	45.569	1.47355e-11	1.50837e-10
ENSMUSG00000061118	66114	Dnajc30	DnaJ heat shock protein family (Hsp40) member C30 [Source:MGI Symbol;Acc:MGI:1913364]	1.19876	3.73424	45.5609	1.47964e-11	1.51367e-10
ENSMUSG00000031068	30926	Glrx3	glutaredoxin 3 [Source:MGI Symbol;Acc:MGI:1353653]	1.05151	5.89117	45.5187	1.51192e-11	1.54574e-10
ENSMUSG00000035674	66091	Ndufa3	NADH dehydrogenase (ubiquinone) 1 alpha subcomplex, 3 [Source:MGI Symbol;Acc:MGI:1913341]	1.77986	9.42984	45.5153	1.51454e-11	1.54747e-10
ENSMUSG00000054237	70567	Fra10ac1	FRA10AC1 homolog (human) [Source:MGI Symbol;Acc:MGI:1917817]	1.01165	4.22051	45.5062	1.52154e-11	1.55368e-10
ENSMUSG00000053004	15465	Hrh1	histamine receptor H1 [Source:MGI Symbol;Acc:MGI:107619]	-1.38457	4.49929	45.505	1.52253e-11	1.55373e-10
ENSMUSG00000004798	29869	Ulk2	unc-51 like kinase 2 [Source:MGI Symbol;Acc:MGI:1352758]	-0.886748	6.58932	45.4864	1.53702e-11	1.56756e-10
ENSMUSG00000004677	17925	Myo9b	myosin IXb [Source:MGI Symbol;Acc:MGI:106624]	-1.68083	3.26053	45.4693	1.55049e-11	1.58032e-10
ENSMUSG00000040462	216440	Os9	amplified in osteosarcoma [Source:MGI Symbol;Acc:MGI:1924301]	1.10438	6.65761	45.4641	1.55463e-11	1.58357e-10
ENSMUSG00000027238	228564	Frmd5	FERM domain containing 5 [Source:MGI Symbol;Acc:MGI:2442557]	1.04034	4.86964	45.4586	1.55899e-11	1.58705e-10
ENSMUSG00000020211	20222	Sf3a2	splicing factor 3a, subunit 2 [Source:MGI Symbol;Acc:MGI:104912]	1.57902	1.81626	45.456	1.56107e-11	1.58818e-10
ENSMUSG00000027111	16403	Itga6	integrin alpha 6 [Source:MGI Symbol;Acc:MGI:96605]	-1.44624	4.48243	45.4492	1.56649e-11	1.59272e-10
ENSMUSG00000032621	218543	Srek1	splicing regulatory glutamine/lysine-rich protein 1 [Source:MGI Symbol;Acc:MGI:2145245]	-1.11155	5.85171	45.4464	1.5687e-11	1.594e-10
ENSMUSG00000034891	104069	Sncb	synuclein, beta [Source:MGI Symbol;Acc:MGI:1889011]	1.51245	6.29933	45.4111	1.59729e-11	1.62206e-10
ENSMUSG00000024962	22340	Vegfb	vascular endothelial growth factor B [Source:MGI Symbol;Acc:MGI:106199]	1.76786	4.53719	45.4018	1.60486e-11	1.62876e-10
ENSMUSG00000028111	13038	Ctsk	cathepsin K [Source:MGI Symbol;Acc:MGI:107823]	-1.82727	3.7239	45.3928	1.61223e-11	1.63524e-10
ENSMUSG00000044519	382867	Zfp488	zinc finger protein 488 [Source:MGI Symbol;Acc:MGI:2686052]	-2.70576	1.20389	45.3886	1.61574e-11	1.6378e-10
ENSMUSG00000047714	66849	Ppp1r2	protein phosphatase 1, regulatory (inhibitor) subunit 2 [Source:MGI Symbol;Acc:MGI:1914099]	1.44446	5.61311	45.386	1.6179e-11	1.63899e-10
ENSMUSG00000000902	20587	Smarcb1	SWI/SNF related, matrix associated, actin dependent regulator of chromatin, subfamily b, member 1 [Source:MGI Symbol;Acc:MGI:1328366]	0.811257	6.3454	45.3742	1.62765e-11	1.64721e-10
ENSMUSG00000028416	12017	Bag1	BCL2-associated athanogene 1 [Source:MGI Symbol;Acc:MGI:108047]	1.64865	6.43136	45.3738	1.628e-11	1.64721e-10
ENSMUSG00000004591	109333	Pkn2	protein kinase N2 [Source:MGI Symbol;Acc:MGI:109211]	-1.18654	4.19404	45.3638	1.63629e-11	1.65459e-10
ENSMUSG00000009145	93838	Dqx1	DEAQ RNA-dependent ATPase [Source:MGI Symbol;Acc:MGI:2136388]	-2.48407	-0.00319707	45.3566	1.6423e-11	1.65966e-10
ENSMUSG00000022889	27393	Mrpl39	mitochondrial ribosomal protein L39 [Source:MGI Symbol;Acc:MGI:1351620]	1.09562	4.81082	45.3503	1.64766e-11	1.66406e-10
ENSMUSG00000093930	208715	Hmgcs1	3-hydroxy-3-methylglutaryl-Coenzyme A synthase 1 [Source:MGI Symbol;Acc:MGI:107592]	-1.21609	8.3133	45.3404	1.65596e-11	1.67143e-10
ENSMUSG00000018459	114644	Slc13a3	solute carrier family 13 (sodium-dependent dicarboxylate transporter), member 3 [Source:MGI Symbol;Acc:MGI:2149635]	-2.29193	3.73525	45.3263	1.66792e-11	1.68248e-10
ENSMUSG00000030127	26894	Cops7a	COP9 signalosome subunit 7A [Source:MGI Symbol;Acc:MGI:1349400]	0.908793	7.05258	45.3178	1.67519e-11	1.68879e-10
ENSMUSG00000045655	219170	Fam216b	family with sequence similarity 216, member B [Source:MGI Symbol;Acc:MGI:2145738]	-5.43542	-1.09518	45.3077	1.68383e-11	1.69648e-10
ENSMUSG00000067870	NA	Rpl31-ps8	ribosomal protein L31, pseudogene 8 [Source:MGI Symbol;Acc:MGI:3647726]	1.57234	2.83276	45.2922	1.69722e-11	1.70893e-10
ENSMUSG00000035227	66624	Spcs2	signal peptidase complex subunit 2 homolog (S. cerevisiae) [Source:MGI Symbol;Acc:MGI:1913874]	0.91024	6.73599	45.289	1.69997e-11	1.71067e-10
ENSMUSG00000020396	380684	Nefh	neurofilament, heavy polypeptide [Source:MGI Symbol;Acc:MGI:97309]	1.10135	6.16521	45.258	1.72715e-11	1.73697e-10
ENSMUSG00000024007	68816	Ppil1	peptidylprolyl isomerase (cyclophilin)-like 1 [Source:MGI Symbol;Acc:MGI:1916066]	0.97309	5.52082	45.2128	1.76742e-11	1.77639e-10
ENSMUSG00000047216	227485	Cdh19	cadherin 19, type 2 [Source:MGI Symbol;Acc:MGI:3588198]	-2.45004	2.60252	45.195	1.78364e-11	1.79161e-10
ENSMUSG00000075020	NA	Mir670hg	MIR670 host gene (non-protein coding) [Source:MGI Symbol;Acc:MGI:3041234]	1.94116	3.43846	45.1797	1.79758e-11	1.80452e-10
ENSMUSG00000063320	544717	1190007I07Rik	RIKEN cDNA 1190007I07 gene [Source:MGI Symbol;Acc:MGI:3698433]	1.45504	2.62003	45.1713	1.80529e-11	1.81117e-10
ENSMUSG00000032554	22041	Trf	transferrin [Source:MGI Symbol;Acc:MGI:98821]	-2.45922	5.84216	45.1682	1.80816e-11	1.81295e-10
ENSMUSG00000030335	66493	Mrpl51	mitochondrial ribosomal protein L51 [Source:MGI Symbol;Acc:MGI:1913743]	1.2082	5.44776	45.151	1.82415e-11	1.82788e-10
ENSMUSG00000097767	NA	Miat	myocardial infarction associated transcript (non-protein coding) [Source:MGI Symbol;Acc:MGI:2444886]	-3.15331	4.68181	45.1335	1.84049e-11	1.84315e-10
ENSMUSG00000021643	20365	Serf1	small EDRK-rich factor 1 [Source:MGI Symbol;Acc:MGI:1337114]	1.50189	4.47091	45.1143	1.8586e-11	1.86016e-10
ENSMUSG00000043831	75099	Lysmd4	LysM, putative peptidoglycan-binding, domain containing 4 [Source:MGI Symbol;Acc:MGI:1922349]	1.01448	4.39464	45.1117	1.86106e-11	1.86151e-10
ENSMUSG00000029047	668173	Pex10	peroxisomal biogenesis factor 10 [Source:MGI Symbol;Acc:MGI:2684988]	0.972604	3.70862	45.0868	1.88494e-11	1.88426e-10
ENSMUSG00000029238	12753	Clock	circadian locomotor output cycles kaput [Source:MGI Symbol;Acc:MGI:99698]	-1.01096	5.00163	45.0811	1.89046e-11	1.88864e-10
ENSMUSG00000038807	380711	Rap1gap2	RAP1 GTPase activating protein 2 [Source:MGI Symbol;Acc:MGI:3028623]	-1.26524	7.56118	45.0752	1.89616e-11	1.8932e-10
ENSMUSG00000044328	216964	Trp53i13	transformation related protein 53 inducible protein 13 [Source:MGI Symbol;Acc:MGI:1915125]	1.99498	1.05215	45.073	1.89827e-11	1.89417e-10
ENSMUSG00000047414	399558	Flrt2	fibronectin leucine rich transmembrane protein 2 [Source:MGI Symbol;Acc:MGI:3603594]	-1.20483	6.90531	45.0642	1.90681e-11	1.90155e-10
ENSMUSG00000068706	NA	Gm10250	predicted pseudogene 10250 [Source:MGI Symbol;Acc:MGI:3642408]	1.83213	1.61025	45.0553	1.91545e-11	1.90902e-10
ENSMUSG00000000378	216527	Ccm2	cerebral cavernous malformation 2 [Source:MGI Symbol;Acc:MGI:2384924]	0.92805	4.81873	45.0326	1.93785e-11	1.9302e-10
ENSMUSG00000090523	71683	Gypc	glycophorin C [Source:MGI Symbol;Acc:MGI:1098566]	-2.36291	0.617121	45.03	1.94038e-11	1.93155e-10
ENSMUSG00000031633	11739	Slc25a4	solute carrier family 25 (mitochondrial carrier, adenine nucleotide translocator), member 4 [Source:MGI Symbol;Acc:MGI:1353495]	1.37237	10.4678	45.0076	1.9627e-11	1.9526e-10
ENSMUSG00000050854	230678	Tmem125	transmembrane protein 125 [Source:MGI Symbol;Acc:MGI:1923409]	-2.18339	3.01646	45.0034	1.96689e-11	1.95561e-10
ENSMUSG00000041961	407821	Znrf3	zinc and ring finger 3 [Source:MGI Symbol;Acc:MGI:3039616]	-1.87995	6.02469	44.9956	1.97481e-11	1.96231e-10
ENSMUSG00000027806	72033	Tsc22d2	TSC22 domain family, member 2 [Source:MGI Symbol;Acc:MGI:1919283]	-1.07341	5.06593	44.9929	1.97747e-11	1.96377e-10
ENSMUSG00000024900	12894	Cpt1a	carnitine palmitoyltransferase 1a, liver [Source:MGI Symbol;Acc:MGI:1098296]	-2.2699	4.38865	44.9759	1.99472e-11	1.97972e-10
ENSMUSG00000053063	232413	Clec12a	C-type lectin domain family 12, member a [Source:MGI Symbol;Acc:MGI:3040968]	2.68789	1.38783	44.962	2.00893e-11	1.9917e-10
ENSMUSG00000003355	66120	Fkbp11	FK506 binding protein 11 [Source:MGI Symbol;Acc:MGI:1913370]	1.99513	1.17492	44.9618	2.00918e-11	1.9917e-10
ENSMUSG00000022770	13383	Dlg1	discs, large homolog 1 (Drosophila) [Source:MGI Symbol;Acc:MGI:107231]	-1.26175	6.47883	44.9594	2.01165e-11	1.99184e-10
ENSMUSG00000015522	11863	Arnt	aryl hydrocarbon receptor nuclear translocator [Source:MGI Symbol;Acc:MGI:88071]	-1.5101	3.4682	44.9593	2.01172e-11	1.99184e-10
ENSMUSG00000032673	67939	Prorsd1	prolyl-tRNA synthetase domain containing 1 [Source:MGI Symbol;Acc:MGI:1915189]	1.30902	2.77745	44.8941	2.07987e-11	2.05809e-10
ENSMUSG00000045503	66460	Sys1	SYS1 Golgi-localized integral membrane protein homolog (S. cerevisiae) [Source:MGI Symbol;Acc:MGI:1913710]	0.871955	5.48122	44.8916	2.08244e-11	2.05941e-10
ENSMUSG00000061731	14042	Ext1	exostoses (multiple) 1 [Source:MGI Symbol;Acc:MGI:894663]	-1.09529	6.02653	44.8502	2.12697e-11	2.10156e-10
ENSMUSG00000037833	328381	Sh2d4b	SH2 domain containing 4B [Source:MGI Symbol;Acc:MGI:1925182]	-4.98338	-1.09735	44.8485	2.1288e-11	2.10156e-10
ENSMUSG00000047409	69274	Ctdspl	CTD (carboxy-terminal domain, RNA polymerase II, polypeptide A) small phosphatase-like [Source:MGI Symbol;Acc:MGI:1916524]	-0.861429	4.54686	44.8485	2.12885e-11	2.10156e-10
ENSMUSG00000038718	18516	Pbx3	pre B cell leukemia homeobox 3 [Source:MGI Symbol;Acc:MGI:97496]	1.49126	4.33491	44.8334	2.14534e-11	2.11658e-10
ENSMUSG00000096936	NA	Gm3510	predicted gene 3510 [Source:MGI Symbol;Acc:MGI:3781687]	-1.65261	1.73746	44.8076	2.17375e-11	2.14334e-10
ENSMUSG00000022148	23880	Fyb	FYN binding protein [Source:MGI Symbol;Acc:MGI:1346327]	-2.0286	3.50171	44.7909	2.19238e-11	2.15956e-10
ENSMUSG00000032763	216136	Ilvbl	ilvB (bacterial acetolactate synthase)-like [Source:MGI Symbol;Acc:MGI:1351911]	1.07151	4.73145	44.7905	2.19279e-11	2.15956e-10
ENSMUSG00000057110	26920	Cntrl	centriolin [Source:MGI Symbol;Acc:MGI:1889576]	-2.22578	3.07985	44.7756	2.20955e-11	2.17477e-10
ENSMUSG00000071074	28064	Yipf3	Yip1 domain family, member 3 [Source:MGI Symbol;Acc:MGI:106280]	0.942428	5.6699	44.7392	2.25109e-11	2.21435e-10
ENSMUSG00000043333	230726	Rhbdl2	rhomboid, veinlet-like 2 (Drosophila) [Source:MGI Symbol;Acc:MGI:3608413]	-3.61359	-0.0681666	44.7065	2.2889e-11	2.25021e-10
ENSMUSG00000043190	218341	Rfesd	Rieske (Fe-S) domain containing [Source:MGI Symbol;Acc:MGI:2145198]	1.0544	3.89724	44.6829	2.31668e-11	2.27618e-10
ENSMUSG00000041559	14264	Fmod	fibromodulin [Source:MGI Symbol;Acc:MGI:1328364]	-2.49771	3.23308	44.6769	2.32379e-11	2.28181e-10
ENSMUSG00000025255	80892	Zfhx4	zinc finger homeodomain 4 [Source:MGI Symbol;Acc:MGI:2137668]	-1.68686	3.05817	44.6694	2.33272e-11	2.28923e-10
ENSMUSG00000033453	235130	Adamts15	a disintegrin-like and metallopeptidase (reprolysin type) with thrombospondin type 1 motif, 15 [Source:MGI Symbol;Acc:MGI:2449569]	1.51546	3.33233	44.6211	2.39105e-11	2.34509e-10
ENSMUSG00000063646	76071	Jakmip1	janus kinase and microtubule interacting protein 1 [Source:MGI Symbol;Acc:MGI:1923321]	1.12311	5.15566	44.5873	2.43266e-11	2.38449e-10
ENSMUSG00000037531	74600	Mrpl47	mitochondrial ribosomal protein L47 [Source:MGI Symbol;Acc:MGI:1921850]	0.969328	4.93633	44.5854	2.43495e-11	2.38533e-10
ENSMUSG00000041130	213753	Zfp598	zinc finger protein 598 [Source:MGI Symbol;Acc:MGI:2670965]	1.23716	2.94233	44.5819	2.43942e-11	2.3883e-10
ENSMUSG00000041696	70784	Rasl12	RAS-like, family 12 [Source:MGI Symbol;Acc:MGI:1918034]	-2.37885	0.199325	44.5641	2.46161e-11	2.40861e-10
ENSMUSG00000022521	12914	Crebbp	CREB binding protein [Source:MGI Symbol;Acc:MGI:1098280]	-0.92314	8.06625	44.5501	2.47936e-11	2.42376e-10
ENSMUSG00000024978	14732	Gpam	glycerol-3-phosphate acyltransferase, mitochondrial [Source:MGI Symbol;Acc:MGI:109162]	-2.56668	2.43882	44.5496	2.48e-11	2.42376e-10
ENSMUSG00000038295	213948	Atg9b	autophagy related 9B [Source:MGI Symbol;Acc:MGI:2685420]	1.87987	1.53965	44.545	2.48574e-11	2.42794e-10
ENSMUSG00000029920	13990	Smarcad1	SWI/SNF-related, matrix-associated actin-dependent regulator of chromatin, subfamily a, containing DEAD/H box 1 [Source:MGI Symbol;Acc:MGI:95453]	-0.989045	4.01675	44.5222	2.51485e-11	2.45493e-10
ENSMUSG00000100691	NA	2010320M18Rik	RIKEN cDNA 2010320M18 gene [Source:MGI Symbol;Acc:MGI:1919343]	1.33444	4.00607	44.5171	2.5214e-11	2.45988e-10
ENSMUSG00000000776	67065	Polr3d	polymerase (RNA) III (DNA directed) polypeptide D [Source:MGI Symbol;Acc:MGI:1914315]	1.11643	3.80532	44.4264	2.64105e-11	2.5751e-10
ENSMUSG00000019997	14219	Ctgf	connective tissue growth factor [Source:MGI Symbol;Acc:MGI:95537]	-1.85234	3.96466	44.4162	2.65485e-11	2.58704e-10
ENSMUSG00000028741	69902	Mrto4	mRNA turnover 4, ribosome maturation factor [Source:MGI Symbol;Acc:MGI:1917152]	0.887728	4.55811	44.373	2.714e-11	2.64313e-10
ENSMUSG00000026827	14571	Gpd2	glycerol phosphate dehydrogenase 2, mitochondrial [Source:MGI Symbol;Acc:MGI:99778]	-1.44275	8.34187	44.3605	2.73139e-11	2.65851e-10
ENSMUSG00000000168	235339	Dlat	dihydrolipoamide S-acetyltransferase (E2 component of pyruvate dehydrogenase complex) [Source:MGI Symbol;Acc:MGI:2385311]	1.0307	6.62964	44.3502	2.74582e-11	2.67099e-10
ENSMUSG00000038543	229600	BC028528	cDNA sequence BC028528 [Source:MGI Symbol;Acc:MGI:2385885]	-2.14482	1.71118	44.3451	2.75301e-11	2.67643e-10
ENSMUSG00000028456	22249	Unc13b	unc-13 homolog B (C. elegans) [Source:MGI Symbol;Acc:MGI:1342278]	-2.04376	4.63084	44.3045	2.81066e-11	2.73087e-10
ENSMUSG00000024621	12978	Csf1r	colony stimulating factor 1 receptor [Source:MGI Symbol;Acc:MGI:1339758]	-1.92102	5.46764	44.279	2.84748e-11	2.76503e-10
ENSMUSG00000022339	55960	Ebag9	estrogen receptor-binding fragment-associated gene 9 [Source:MGI Symbol;Acc:MGI:1859920]	0.941196	4.40057	44.2675	2.86427e-11	2.77971e-10
ENSMUSG00000026260	67273	Ndufa10	NADH dehydrogenase (ubiquinone) 1 alpha subcomplex 10 [Source:MGI Symbol;Acc:MGI:1914523]	1.04952	7.503	44.2532	2.88534e-11	2.79853e-10
ENSMUSG00000004110	12290	Cacna1e	calcium channel, voltage-dependent, R type, alpha 1E subunit [Source:MGI Symbol;Acc:MGI:106217]	-1.32708	7.61897	44.2456	2.89658e-11	2.8078e-10
ENSMUSG00000049536	237052	Tceal1	transcription elongation factor A (SII)-like 1 [Source:MGI Symbol;Acc:MGI:2385317]	1.27664	5.70103	44.232	2.91667e-11	2.82562e-10
ENSMUSG00000027215	12521	Cd82	CD82 antigen [Source:MGI Symbol;Acc:MGI:104651]	-2.16416	4.16166	44.2016	2.96235e-11	2.86821e-10
ENSMUSG00000058603	NA	Rpl28-ps1	ribosomal protein L28, pseudogene 1 [Source:MGI Symbol;Acc:MGI:3705349]	2.04015	1.12056	44.1801	2.99515e-11	2.89827e-10
ENSMUSG00000037279	107586	Ovol2	ovo like zinc finger 2 [Source:MGI Symbol;Acc:MGI:1338039]	-1.7325	1.93152	44.1615	3.02367e-11	2.92417e-10
ENSMUSG00000021706	218441	Zfyve16	zinc finger, FYVE domain containing 16 [Source:MGI Symbol;Acc:MGI:2145181]	-1.41522	3.09036	44.153	3.03682e-11	2.93518e-10
ENSMUSG00000002812	14248	Flii	flightless I actin binding protein [Source:MGI Symbol;Acc:MGI:1342286]	1.04727	4.53833	44.1429	3.05253e-11	2.94865e-10
ENSMUSG00000070780	245945	Rbm47	RNA binding motif protein 47 [Source:MGI Symbol;Acc:MGI:2384294]	-2.63314	1.09158	44.1071	3.10894e-11	3.0014e-10
ENSMUSG00000031508	102334	Ankrd10	ankyrin repeat domain 10 [Source:MGI Symbol;Acc:MGI:1921840]	-1.03301	4.75703	44.088	3.13946e-11	3.0291e-10
ENSMUSG00000027162	22343	Lin7c	lin-7 homolog C (C. elegans) [Source:MGI Symbol;Acc:MGI:1330839]	-1.01959	6.3159	44.0813	3.15021e-11	3.03772e-10
ENSMUSG00000032271	18113	Nnmt	nicotinamide N-methyltransferase [Source:MGI Symbol;Acc:MGI:1099443]	1.91984	1.5684	44.0801	3.15207e-11	3.03775e-10
ENSMUSG00000022723	NA	Crybg3	beta-gamma crystallin domain containing 3 [Source:MGI Symbol;Acc:MGI:2676311]	-1.88122	2.29455	44.0593	3.18574e-11	3.06841e-10
ENSMUSG00000064345	17717	mt-Nd2	mitochondrially encoded NADH dehydrogenase 2 [Source:MGI Symbol;Acc:MGI:102500]	-4.40603	12.0178	44.0558	3.19148e-11	3.07217e-10
ENSMUSG00000020297	18197	Nsg2	neuron specific gene family member 2 [Source:MGI Symbol;Acc:MGI:1202070]	1.19973	8.66951	44.0114	3.2647e-11	3.13908e-10
ENSMUSG00000041642	16565	Kif21b	kinesin family member 21B [Source:MGI Symbol;Acc:MGI:109234]	-0.972502	5.92037	44.0114	3.26476e-11	3.13908e-10
ENSMUSG00000051256	67767	Jagn1	jagunal homolog 1 [Source:MGI Symbol;Acc:MGI:1915017]	1.01932	6.20876	43.9992	3.28506e-11	3.15677e-10
ENSMUSG00000031557	83436	Plekha2	pleckstrin homology domain-containing, family A (phosphoinositide binding specific) member 2 [Source:MGI Symbol;Acc:MGI:1928144]	-1.34774	3.52623	43.984	3.31079e-11	3.17966e-10
ENSMUSG00000045817	12193	Zfp36l2	zinc finger protein 36, C3H type-like 2 [Source:MGI Symbol;Acc:MGI:107945]	-2.42014	1.98374	43.9595	3.35241e-11	3.21777e-10
ENSMUSG00000009681	110279	Bcr	breakpoint cluster region [Source:MGI Symbol;Acc:MGI:88141]	0.821756	6.73778	43.9583	3.35447e-11	3.21789e-10
ENSMUSG00000064247	403178	Plcxd1	phosphatidylinositol-specific phospholipase C, X domain containing 1 [Source:MGI Symbol;Acc:MGI:2685422]	1.13709	2.9059	43.9393	3.38727e-11	3.24748e-10
ENSMUSG00000033420	69538	Antxr1	anthrax toxin receptor 1 [Source:MGI Symbol;Acc:MGI:1916788]	-2.30204	3.1483	43.9265	3.40935e-11	3.26537e-10
ENSMUSG00000095123	NA	Gm21781	predicted gene, 21781 [Source:MGI Symbol;Acc:MGI:5433945]	-4.08934	2.32429	43.9262	3.40986e-11	3.26537e-10
ENSMUSG00000079304	71149	4933413G19Rik	RIKEN cDNA 4933413G19 gene [Source:MGI Symbol;Acc:MGI:1918399]	-3.46495	0.324268	43.9095	3.4392e-11	3.29158e-10
ENSMUSG00000034560	319277	Washc4	WASH complex subunit 4 [Source:MGI Symbol;Acc:MGI:2441787]	-0.890831	4.71775	43.8977	3.45992e-11	3.30951e-10
ENSMUSG00000021149	69237	Gtpbp4	GTP binding protein 4 [Source:MGI Symbol;Acc:MGI:1916487]	0.831139	6.2533	43.895	3.46472e-11	3.31023e-10
ENSMUSG00000021217	243931	Tshz3	teashirt zinc finger family member 3 [Source:MGI Symbol;Acc:MGI:2442819]	-0.944283	5.4022	43.8944	3.46582e-11	3.31023e-10
ENSMUSG00000002205	101568	Vrk3	vaccinia related kinase 3 [Source:MGI Symbol;Acc:MGI:2182465]	0.995515	4.7662	43.8939	3.46665e-11	3.31023e-10
ENSMUSG00000032688	240354	Malt1	MALT1 paracaspase [Source:MGI Symbol;Acc:MGI:2445027]	-2.56241	1.14568	43.864	3.51999e-11	3.35924e-10
ENSMUSG00000022342	67498	Kcnv1	potassium channel, subfamily V, member 1 [Source:MGI Symbol;Acc:MGI:1914748]	-1.52205	7.12993	43.8619	3.52382e-11	3.36097e-10
ENSMUSG00000022090	213019	Pdlim2	PDZ and LIM domain 2 [Source:MGI Symbol;Acc:MGI:2384850]	-1.75793	6.57639	43.8555	3.53528e-11	3.36996e-10
ENSMUSG00000020905	216835	Usp43	ubiquitin specific peptidase 43 [Source:MGI Symbol;Acc:MGI:2444541]	-2.45595	1.51148	43.8486	3.54784e-11	3.38e-10
ENSMUSG00000090553	20643	Snrpe	small nuclear ribonucleoprotein E [Source:MGI Symbol;Acc:MGI:98346]	1.1746	5.49174	43.8424	3.55908e-11	3.38876e-10
ENSMUSG00000004880	98386	Lbr	lamin B receptor [Source:MGI Symbol;Acc:MGI:2138281]	-1.37492	3.80174	43.8273	3.58661e-11	3.41303e-10
ENSMUSG00000030111	232345	A2m	alpha-2-macroglobulin [Source:MGI Symbol;Acc:MGI:2449119]	-2.55431	2.10832	43.8141	3.61092e-11	3.43419e-10
ENSMUSG00000024525	114663	Impa2	inositol (myo)-1(or 4)-monophosphatase 2 [Source:MGI Symbol;Acc:MGI:2149728]	1.84331	1.86143	43.8106	3.61743e-11	3.43842e-10
ENSMUSG00000026442	269116	Nfasc	neurofascin [Source:MGI Symbol;Acc:MGI:104753]	-1.19887	8.70011	43.7829	3.66895e-11	3.4854e-10
ENSMUSG00000028861	66407	Mrps15	mitochondrial ribosomal protein S15 [Source:MGI Symbol;Acc:MGI:1913657]	1.1489	4.6283	43.771	3.69141e-11	3.50473e-10
ENSMUSG00000039533	75104	Mmd2	monocyte to macrophage differentiation-associated 2 [Source:MGI Symbol;Acc:MGI:1922354]	-1.82514	8.45798	43.7593	3.71343e-11	3.52363e-10
ENSMUSG00000054693	11487	Adam10	a disintegrin and metallopeptidase domain 10 [Source:MGI Symbol;Acc:MGI:109548]	-1.27668	7.16283	43.7163	3.79605e-11	3.59997e-10
ENSMUSG00000020807	74477	4933427D14Rik	RIKEN cDNA 4933427D14 gene [Source:MGI Symbol;Acc:MGI:1921727]	-1.31276	3.75257	43.7086	3.81089e-11	3.61199e-10
ENSMUSG00000048070	193003	Pirt	phosphoinositide-interacting regulator of transient receptor potential channels [Source:MGI Symbol;Acc:MGI:2443635]	-2.83813	0.0627128	43.6994	3.82885e-11	3.62694e-10
ENSMUSG00000046756	50529	Mrps7	mitchondrial ribosomal protein S7 [Source:MGI Symbol;Acc:MGI:1354367]	1.10883	4.98748	43.695	3.83745e-11	3.63302e-10
ENSMUSG00000040187	272322	Arntl2	aryl hydrocarbon receptor nuclear translocator-like 2 [Source:MGI Symbol;Acc:MGI:2684845]	-2.05174	1.5383	43.6796	3.86773e-11	3.6596e-10
ENSMUSG00000004843	68942	Chmp2b	charged multivesicular body protein 2B [Source:MGI Symbol;Acc:MGI:1916192]	1.0237	6.38872	43.6451	3.93659e-11	3.72264e-10
ENSMUSG00000030849	14183	Fgfr2	fibroblast growth factor receptor 2 [Source:MGI Symbol;Acc:MGI:95523]	-1.40638	5.19463	43.6368	3.95344e-11	3.73591e-10
ENSMUSG00000054405	68598	Dnajc8	DnaJ heat shock protein family (Hsp40) member C8 [Source:MGI Symbol;Acc:MGI:1915848]	1.02184	7.26658	43.6359	3.95511e-11	3.73591e-10
ENSMUSG00000022972	68001	1110004E09Rik	RIKEN cDNA 1110004E09 gene [Source:MGI Symbol;Acc:MGI:1915251]	1.14078	4.18205	43.6306	3.96598e-11	3.74405e-10
ENSMUSG00000052160	104759	Pld4	phospholipase D family, member 4 [Source:MGI Symbol;Acc:MGI:2144765]	-2.00484	3.50582	43.6271	3.97295e-11	3.7485e-10
ENSMUSG00000040423	381305	Rc3h1	RING CCCH (C3H) domains 1 [Source:MGI Symbol;Acc:MGI:2685397]	-0.968793	5.38135	43.6009	4.02659e-11	3.79695e-10
ENSMUSG00000018677	68066	Slc25a39	solute carrier family 25, member 39 [Source:MGI Symbol;Acc:MGI:1196386]	1.24991	5.83968	43.5828	4.06406e-11	3.83011e-10
ENSMUSG00000024873	12794	Cnih2	cornichon family AMPA receptor auxiliary protein 2 [Source:MGI Symbol;Acc:MGI:1277225]	1.0023	5.88647	43.58	4.06985e-11	3.8334e-10
ENSMUSG00000053279	11668	Aldh1a1	aldehyde dehydrogenase family 1, subfamily A1 [Source:MGI Symbol;Acc:MGI:1353450]	-2.42596	7.35427	43.564	4.10322e-11	3.86264e-10
ENSMUSG00000051413	54711	Plagl2	pleiomorphic adenoma gene-like 2 [Source:MGI Symbol;Acc:MGI:1933165]	-1.35808	2.62377	43.5542	4.12381e-11	3.87983e-10
ENSMUSG00000027078	56791	Ube2l6	ubiquitin-conjugating enzyme E2L 6 [Source:MGI Symbol;Acc:MGI:1914500]	-1.3806	2.67087	43.552	4.12848e-11	3.88203e-10
ENSMUSG00000045877	NA	4933415A04Rik	RIKEN cDNA 4933415A04 gene [Source:MGI Symbol;Acc:MGI:1922977]	-2.09305	2.37406	43.5399	4.154e-11	3.90383e-10
ENSMUSG00000096926	NA	Gm26823	predicted gene, 26823 [Source:MGI Symbol;Acc:MGI:5477317]	-3.88363	-0.138831	43.5382	4.15754e-11	3.90494e-10
ENSMUSG00000041235	320790	Chd7	chromodomain helicase DNA binding protein 7 [Source:MGI Symbol;Acc:MGI:2444748]	-1.43871	3.51567	43.5366	4.16097e-11	3.90596e-10
ENSMUSG00000054894	68055	Atp5s	ATP synthase, H+ transporting, mitochondrial F0 complex, subunit S [Source:MGI Symbol;Acc:MGI:1915305]	1.08896	4.32854	43.5317	4.17146e-11	3.9136e-10
ENSMUSG00000030237	28250	Slco1a4	solute carrier organic anion transporter family, member 1a4 [Source:MGI Symbol;Acc:MGI:1351896]	-3.99587	3.61312	43.5262	4.18312e-11	3.92233e-10
ENSMUSG00000052632	211914	Asap2	ArfGAP with SH3 domain, ankyrin repeat and PH domain 2 [Source:MGI Symbol;Acc:MGI:2685438]	-0.957555	3.84626	43.4889	4.26373e-11	3.99565e-10
ENSMUSG00000066440	211978	Zfyve26	zinc finger, FYVE domain containing 26 [Source:MGI Symbol;Acc:MGI:1924767]	-1.36148	3.60753	43.4749	4.29435e-11	4.02208e-10
ENSMUSG00000037601	18102	Nme1	NME/NM23 nucleoside diphosphate kinase 1 [Source:MGI Symbol;Acc:MGI:97355]	1.01854	8.22955	43.4487	4.35229e-11	4.07406e-10
ENSMUSG00000029249	19712	Rest	RE1-silencing transcription factor [Source:MGI Symbol;Acc:MGI:104897]	-2.07148	2.7646	43.4089	4.44154e-11	4.15526e-10
ENSMUSG00000036422	18530	Pcdh8	protocadherin 8 [Source:MGI Symbol;Acc:MGI:1306800]	1.06504	5.57369	43.3885	4.48821e-11	4.19656e-10
ENSMUSG00000003546	74764	Klc4	kinesin light chain 4 [Source:MGI Symbol;Acc:MGI:1922014]	1.6939	2.62279	43.3685	4.53427e-11	4.23627e-10
ENSMUSG00000084786	66177	Ubl5	ubiquitin-like 5 [Source:MGI Symbol;Acc:MGI:1913427]	1.47398	8.42366	43.3679	4.53577e-11	4.23627e-10
ENSMUSG00000062070	18655	Pgk1	phosphoglycerate kinase 1 [Source:MGI Symbol;Acc:MGI:97555]	1.10708	5.8571	43.3571	4.56075e-11	4.25721e-10
ENSMUSG00000028977	69743	Casz1	castor zinc finger 1 [Source:MGI Symbol;Acc:MGI:1196251]	1.2468	2.29408	43.3422	4.59564e-11	4.28711e-10
ENSMUSG00000025613	12469	Cct8	chaperonin containing Tcp1, subunit 8 (theta) [Source:MGI Symbol;Acc:MGI:107183]	0.981545	7.81935	43.3412	4.59794e-11	4.28711e-10
ENSMUSG00000052512	78286	Nav2	neuron navigator 2 [Source:MGI Symbol;Acc:MGI:2183691]	-1.98045	6.28861	43.339	4.60313e-11	4.28955e-10
ENSMUSG00000048215	NA	A630023P12Rik	RIKEN cDNA A630023P12 gene [Source:MGI Symbol;Acc:MGI:2445162]	-2.25041	1.03134	43.3334	4.61631e-11	4.29942e-10
ENSMUSG00000038462	66694	Uqcrfs1	ubiquinol-cytochrome c reductase, Rieske iron-sulfur polypeptide 1 [Source:MGI Symbol;Acc:MGI:1913944]	1.41491	7.47451	43.2976	4.7015e-11	4.37632e-10
ENSMUSG00000020358	15384	Hnrnpab	heterogeneous nuclear ribonucleoprotein A/B [Source:MGI Symbol;Acc:MGI:1330294]	0.970617	5.43665	43.27	4.76849e-11	4.43619e-10
ENSMUSG00000024997	11757	Prdx3	peroxiredoxin 3 [Source:MGI Symbol;Acc:MGI:88034]	1.03614	7.33978	43.2331	4.85904e-11	4.51791e-10
ENSMUSG00000095098	240514	Ccdc85b	coiled-coil domain containing 85B [Source:MGI Symbol;Acc:MGI:2147607]	1.7002	1.36044	43.2242	4.88143e-11	4.53619e-10
ENSMUSG00000022901	12524	Cd86	CD86 antigen [Source:MGI Symbol;Acc:MGI:101773]	-2.08467	2.22951	43.2146	4.90524e-11	4.55326e-10
ENSMUSG00000024378	170459	Stard4	StAR-related lipid transfer (START) domain containing 4 [Source:MGI Symbol;Acc:MGI:2156764]	-1.33569	4.39857	43.2146	4.90528e-11	4.55326e-10
ENSMUSG00000044707	380694	Ccnjl	cyclin J-like [Source:MGI Symbol;Acc:MGI:2685723]	-1.33269	2.34366	43.1906	4.96579e-11	4.60686e-10
ENSMUSG00000015478	54197	Rnf5	ring finger protein 5 [Source:MGI Symbol;Acc:MGI:1860076]	1.10814	3.91354	43.1719	5.01355e-11	4.64858e-10
ENSMUSG00000028622	56280	Mrpl37	mitochondrial ribosomal protein L37 [Source:MGI Symbol;Acc:MGI:1926268]	0.962998	4.93042	43.1554	5.05599e-11	4.68531e-10
ENSMUSG00000063317	76179	Usp31	ubiquitin specific peptidase 31 [Source:MGI Symbol;Acc:MGI:1923429]	-0.897495	6.13078	43.1526	5.06321e-11	4.68939e-10
ENSMUSG00000043801	NA	Oaz1-ps	ornithine decarboxylase antizyme 1, pseudogene [Source:MGI Symbol;Acc:MGI:108188]	1.46507	1.91145	43.1389	5.09873e-11	4.71966e-10
ENSMUSG00000001911	18032	Nfix	nuclear factor I/X [Source:MGI Symbol;Acc:MGI:97311]	-1.16301	7.21224	43.1305	5.12075e-11	4.73741e-10
ENSMUSG00000018076	76199	Med13l	mediator complex subunit 13-like [Source:MGI Symbol;Acc:MGI:2670178]	-0.94038	6.92253	43.1168	5.15677e-11	4.76808e-10
ENSMUSG00000056268	329260	Dennd1b	DENN/MADD domain containing 1B [Source:MGI Symbol;Acc:MGI:2447812]	-1.35828	3.36193	43.1127	5.1676e-11	4.77544e-10
ENSMUSG00000021368	67046	Tbc1d7	TBC1 domain family, member 7 [Source:MGI Symbol;Acc:MGI:1914296]	1.00708	5.5286	43.0955	5.21307e-11	4.81478e-10
ENSMUSG00000026435	212980	Slc45a3	solute carrier family 45, member 3 [Source:MGI Symbol;Acc:MGI:1922082]	-2.55478	1.35818	43.0734	5.2723e-11	4.86678e-10
ENSMUSG00000041308	20650	Sntb2	syntrophin, basic 2 [Source:MGI Symbol;Acc:MGI:101771]	-1.18792	2.7132	43.0619	5.30343e-11	4.8928e-10
ENSMUSG00000003868	20174	Ruvbl2	RuvB-like protein 2 [Source:MGI Symbol;Acc:MGI:1342299]	0.978447	4.37954	43.0495	5.33722e-11	4.92124e-10
ENSMUSG00000015943	69168	Bola1	bolA-like 1 (E. coli) [Source:MGI Symbol;Acc:MGI:1916418]	1.52965	3.55698	43.0403	5.36246e-11	4.94178e-10
ENSMUSG00000026675	15490	Hsd17b7	hydroxysteroid (17-beta) dehydrogenase 7 [Source:MGI Symbol;Acc:MGI:1330808]	-1.18449	4.95544	43.0343	5.37876e-11	4.95406e-10
ENSMUSG00000048040	76976	Arxes2	adipocyte-related X-chromosome expressed sequence 2 [Source:MGI Symbol;Acc:MGI:1924226]	0.984428	6.58176	43.0265	5.40045e-11	4.97128e-10
ENSMUSG00000016308	22209	Ube2a	ubiquitin-conjugating enzyme E2A [Source:MGI Symbol;Acc:MGI:102959]	0.896276	5.93043	43.0106	5.44437e-11	5.00894e-10
ENSMUSG00000045589	230235	Frrs1l	ferric-chelate reductase 1 like [Source:MGI Symbol;Acc:MGI:2442704]	-1.21841	9.01261	43.0029	5.46593e-11	5.026e-10
ENSMUSG00000018858	68572	Mrpl58	mitochondrial ribosomal protein L58 [Source:MGI Symbol;Acc:MGI:1915822]	0.852149	5.66362	42.9875	5.50917e-11	5.06296e-10
ENSMUSG00000034171	14073	Faah	fatty acid amide hydrolase [Source:MGI Symbol;Acc:MGI:109609]	-1.12305	7.0836	42.9792	5.53237e-11	5.08148e-10
ENSMUSG00000029616	67397	Erp29	endoplasmic reticulum protein 29 [Source:MGI Symbol;Acc:MGI:1914647]	0.928269	6.0638	42.9732	5.54945e-11	5.09434e-10
ENSMUSG00000024403	66237	Atp6v1g2	ATPase, H+ transporting, lysosomal V1 subunit G2 [Source:MGI Symbol;Acc:MGI:1913487]	1.44691	9.42067	42.952	5.60996e-11	5.14705e-10
ENSMUSG00000009079	14030	Ewsr1	Ewing sarcoma breakpoint region 1 [Source:MGI Symbol;Acc:MGI:99960]	1.05174	5.83933	42.9399	5.64463e-11	5.176e-10
ENSMUSG00000035649	319885	Zcchc7	zinc finger, CCHC domain containing 7 [Source:MGI Symbol;Acc:MGI:2442912]	-1.91537	5.208	42.9045	5.7479e-11	5.2678e-10
ENSMUSG00000001285	60315	Myg1	melanocyte proliferating gene 1 [Source:MGI Symbol;Acc:MGI:1929864]	0.742879	5.27518	42.884	5.80833e-11	5.32025e-10
ENSMUSG00000026826	18227	Nr4a2	nuclear receptor subfamily 4, group A, member 2 [Source:MGI Symbol;Acc:MGI:1352456]	-1.62761	5.86288	42.8795	5.82177e-11	5.32962e-10
ENSMUSG00000044583	170743	Tlr7	toll-like receptor 7 [Source:MGI Symbol;Acc:MGI:2176882]	-2.16185	1.30059	42.8723	5.84316e-11	5.34627e-10
ENSMUSG00000022436	20401	Sh3bp1	SH3-domain binding protein 1 [Source:MGI Symbol;Acc:MGI:104603]	1.05176	6.92702	42.8595	5.88161e-11	5.37849e-10
ENSMUSG00000045160	78653	Bola3	bolA-like 3 (E. coli) [Source:MGI Symbol;Acc:MGI:1925903]	1.22892	3.88983	42.8416	5.93565e-11	5.42492e-10
ENSMUSG00000002345	72368	Borcs8	BLOC-1 related complex subunit 8 [Source:MGI Symbol;Acc:MGI:1919618]	0.998562	5.62734	42.8388	5.94407e-11	5.42964e-10
ENSMUSG00000038545	66515	Cul7	cullin 7 [Source:MGI Symbol;Acc:MGI:1913765]	1.25802	3.34278	42.8297	5.97188e-11	5.45205e-10
ENSMUSG00000029551	66506	Psmg3	proteasome (prosome, macropain) assembly chaperone 3 [Source:MGI Symbol;Acc:MGI:1913756]	1.07898	4.18319	42.8235	5.99092e-11	5.46643e-10
ENSMUSG00000021253	21809	Tgfb3	transforming growth factor, beta 3 [Source:MGI Symbol;Acc:MGI:98727]	1.07447	3.69809	42.8187	6.00563e-11	5.47684e-10
ENSMUSG00000031816	234814	Mthfsd	methenyltetrahydrofolate synthetase domain containing [Source:MGI Symbol;Acc:MGI:2679252]	0.993832	4.00442	42.8148	6.01765e-11	5.4848e-10
ENSMUSG00000023963	56050	Cyp39a1	cytochrome P450, family 39, subfamily a, polypeptide 1 [Source:MGI Symbol;Acc:MGI:1927096]	-1.85684	2.733	42.7809	6.1227e-11	5.57749e-10
ENSMUSG00000036751	110323	Cox6b1	cytochrome c oxidase, subunit VIb polypeptide 1 [Source:MGI Symbol;Acc:MGI:107460]	1.67669	9.93951	42.7719	6.1509e-11	5.60012e-10
ENSMUSG00000005534	16337	Insr	insulin receptor [Source:MGI Symbol;Acc:MGI:96575]	-1.06818	5.2014	42.7545	6.20601e-11	5.6472e-10
ENSMUSG00000001380	15115	Hars	histidyl-tRNA synthetase [Source:MGI Symbol;Acc:MGI:108087]	0.923227	6.83805	42.7459	6.23332e-11	5.66895e-10
ENSMUSG00000038605	229011	Samd10	sterile alpha motif domain containing 10 [Source:MGI Symbol;Acc:MGI:2443872]	1.07639	4.32095	42.7193	6.31846e-11	5.74324e-10
ENSMUSG00000023959	224796	Clic5	chloride intracellular channel 5 [Source:MGI Symbol;Acc:MGI:1917912]	-2.42033	1.43263	42.7133	6.33797e-11	5.75783e-10
ENSMUSG00000019806	66253	Aig1	androgen-induced 1 [Source:MGI Symbol;Acc:MGI:1913503]	0.947084	6.76267	42.6846	6.43181e-11	5.83988e-10
ENSMUSG00000061778	76763	Mospd2	motile sperm domain containing 2 [Source:MGI Symbol;Acc:MGI:1924013]	-1.12061	3.81551	42.6679	6.48671e-11	5.88652e-10
ENSMUSG00000033454	268564	Zbtb1	zinc finger and BTB domain containing 1 [Source:MGI Symbol;Acc:MGI:2442326]	-1.17576	3.65919	42.6573	6.52213e-11	5.91544e-10
ENSMUSG00000046805	17476	Mpeg1	macrophage expressed gene 1 [Source:MGI Symbol;Acc:MGI:1333743]	-2.24954	3.92725	42.6498	6.54719e-11	5.93493e-10
ENSMUSG00000038507	243771	Parp12	poly (ADP-ribose) polymerase family, member 12 [Source:MGI Symbol;Acc:MGI:2143990]	-2.06115	2.03203	42.6234	6.63603e-11	6.01218e-10
ENSMUSG00000025436	68876	Atp23	ATP23 metallopeptidase and ATP synthase assembly factor homolog [Source:MGI Symbol;Acc:MGI:1916984]	1.40722	2.72006	42.597	6.72621e-11	6.09057e-10
ENSMUSG00000030246	16832	Ldhb	lactate dehydrogenase B [Source:MGI Symbol;Acc:MGI:96763]	1.33851	10.0187	42.5577	6.86271e-11	6.21079e-10
ENSMUSG00000005161	21672	Prdx2	peroxiredoxin 2 [Source:MGI Symbol;Acc:MGI:109486]	1.11674	8.53398	42.5491	6.89297e-11	6.23478e-10
ENSMUSG00000028049	24045	Scamp3	secretory carrier membrane protein 3 [Source:MGI Symbol;Acc:MGI:1346346]	1.01794	5.51259	42.5172	7.00625e-11	6.3338e-10
ENSMUSG00000024325	19763	Ring1	ring finger protein 1 [Source:MGI Symbol;Acc:MGI:1101770]	1.21828	2.80381	42.5156	7.01193e-11	6.33549e-10
ENSMUSG00000002844	11544	Adprh	ADP-ribosylarginine hydrolase [Source:MGI Symbol;Acc:MGI:1098234]	1.00894	6.5308	42.4968	7.07981e-11	6.39335e-10
ENSMUSG00000060675	225845	Pla2g16	phospholipase A2, group XVI [Source:MGI Symbol;Acc:MGI:2179715]	-2.21503	4.74425	42.4772	7.1512e-11	6.45432e-10
ENSMUSG00000039345	239706	Mettl22	methyltransferase like 22 [Source:MGI Symbol;Acc:MGI:2384301]	0.944972	4.7644	42.4757	7.1567e-11	6.45578e-10
ENSMUSG00000001270	12709	Ckb	creatine kinase, brain [Source:MGI Symbol;Acc:MGI:88407]	1.67639	9.87623	42.4588	7.21864e-11	6.50812e-10
ENSMUSG00000048285	319710	Frmd6	FERM domain containing 6 [Source:MGI Symbol;Acc:MGI:2442579]	-1.46699	3.66939	42.4576	7.22309e-11	6.50861e-10
ENSMUSG00000020792	53413	Exoc7	exocyst complex component 7 [Source:MGI Symbol;Acc:MGI:1859270]	0.800301	5.33592	42.4547	7.23395e-11	6.51487e-10
ENSMUSG00000033676	14402	Gabrb3	gamma-aminobutyric acid (GABA) A receptor, subunit beta 3 [Source:MGI Symbol;Acc:MGI:95621]	-1.13327	8.14372	42.4353	7.30578e-11	6.57599e-10
ENSMUSG00000039191	19664	Rbpj	recombination signal binding protein for immunoglobulin kappa J region [Source:MGI Symbol;Acc:MGI:96522]	-1.19292	3.42048	42.3961	7.45393e-11	6.70571e-10
ENSMUSG00000027674	58869	Pex5l	peroxisomal biogenesis factor 5-like [Source:MGI Symbol;Acc:MGI:1916672]	-1.30577	5.36065	42.3698	7.55462e-11	6.79262e-10
ENSMUSG00000038255	18013	Neurod2	neurogenic differentiation 2 [Source:MGI Symbol;Acc:MGI:107755]	-2.48854	4.11033	42.3679	7.56202e-11	6.79561e-10
ENSMUSG00000072772	14790	Grcc10	gene rich cluster, C10 gene [Source:MGI Symbol;Acc:MGI:1315201]	1.18429	3.93246	42.3568	7.60502e-11	6.83056e-10
ENSMUSG00000021716	67288	Srek1ip1	splicing regulatory glutamine/lysine-rich protein 1interacting protein 1 [Source:MGI Symbol;Acc:MGI:1914538]	0.928436	5.34559	42.323	7.73782e-11	6.94608e-10
ENSMUSG00000024556	107029	Me2	malic enzyme 2, NAD(+)-dependent, mitochondrial [Source:MGI Symbol;Acc:MGI:2147351]	1.04162	4.59713	42.2294	8.11699e-11	7.28253e-10
ENSMUSG00000029402	76167	Snrnp35	small nuclear ribonucleoprotein 35 (U11/U12) [Source:MGI Symbol;Acc:MGI:1923417]	1.34157	2.95103	42.2271	8.12657e-11	7.28719e-10
ENSMUSG00000022033	52033	Pbk	PDZ binding kinase [Source:MGI Symbol;Acc:MGI:1289156]	-2.54506	1.46624	42.2183	8.1634e-11	7.31531e-10
ENSMUSG00000097640	NA	Gm20033	predicted gene, 20033 [Source:MGI Symbol;Acc:MGI:5012218]	2.35651	0.0897548	42.2175	8.16672e-11	7.31531e-10
ENSMUSG00000048458	109050	Fam212b	family with sequence similarity 212, member B [Source:MGI Symbol;Acc:MGI:1923497]	-0.949869	6.30704	42.2143	8.18009e-11	7.32334e-10
ENSMUSG00000028522	71148	Mier1	MEIR1 treanscription regulator [Source:MGI Symbol;Acc:MGI:1918398]	-0.993147	5.2793	42.1776	8.33478e-11	7.45781e-10
ENSMUSG00000022757	21787	Tfg	Trk-fused gene [Source:MGI Symbol;Acc:MGI:1338041]	0.950871	6.12369	42.1742	8.34932e-11	7.4668e-10
ENSMUSG00000043284	216821	Tmem11	transmembrane protein 11 [Source:MGI Symbol;Acc:MGI:2144726]	0.9193	4.99924	42.1489	8.45805e-11	7.55998e-10
ENSMUSG00000034810	20272	Scn7a	sodium channel, voltage-gated, type VII, alpha [Source:MGI Symbol;Acc:MGI:102965]	-1.76612	2.05743	42.1411	8.49192e-11	7.58618e-10
ENSMUSG00000028957	18628	Per3	period circadian clock 3 [Source:MGI Symbol;Acc:MGI:1277134]	-1.93749	5.97174	42.136	8.51417e-11	7.60197e-10
ENSMUSG00000029570	16848	Lfng	LFNG O-fucosylpeptide 3-beta-N-acetylglucosaminyltransferase [Source:MGI Symbol;Acc:MGI:1095413]	-2.48916	1.974	42.1217	8.57683e-11	7.65381e-10
ENSMUSG00000044447	68813	Dock5	dedicator of cytokinesis 5 [Source:MGI Symbol;Acc:MGI:2652871]	-1.95198	1.89899	42.1058	8.64655e-11	7.71189e-10
ENSMUSG00000041779	170829	Tram2	translocating chain-associating membrane protein 2 [Source:MGI Symbol;Acc:MGI:1924817]	-2.74894	1.02308	42.0981	8.68062e-11	7.73812e-10
ENSMUSG00000058153	56747	Sez6l	seizure related 6 homolog like [Source:MGI Symbol;Acc:MGI:1935121]	-1.45258	7.25979	42.0748	8.78495e-11	7.82693e-10
ENSMUSG00000065954	320165	Tacc1	transforming, acidic coiled-coil containing protein 1 [Source:MGI Symbol;Acc:MGI:2443510]	-1.33441	7.2211	42.0599	8.852e-11	7.88245e-10
ENSMUSG00000000560	14395	Gabra2	gamma-aminobutyric acid (GABA) A receptor, subunit alpha 2 [Source:MGI Symbol;Acc:MGI:95614]	-1.12358	5.86601	42.0533	8.88201e-11	7.90494e-10
ENSMUSG00000039148	20227	Sart1	squamous cell carcinoma antigen recognized by T cells 1 [Source:MGI Symbol;Acc:MGI:1309453]	1.16883	4.6094	42.0379	8.95206e-11	7.96302e-10
ENSMUSG00000041733	52064	Coq5	coenzyme Q5 methyltransferase [Source:MGI Symbol;Acc:MGI:1098643]	0.913162	5.22945	42.0295	8.99087e-11	7.99174e-10
ENSMUSG00000018189	56207	Uchl5	ubiquitin carboxyl-terminal esterase L5 [Source:MGI Symbol;Acc:MGI:1914848]	1.06225	5.95671	42.0288	8.99395e-11	7.99174e-10
ENSMUSG00000063236	117171	1110038F14Rik	RIKEN cDNA 1110038F14 gene [Source:MGI Symbol;Acc:MGI:2152337]	0.938484	3.73649	42.0256	9.00878e-11	8.00064e-10
ENSMUSG00000015289	66192	Lage3	L antigen family, member 3 [Source:MGI Symbol;Acc:MGI:1913442]	1.16208	5.40449	42.0168	9.04936e-11	8.03239e-10
ENSMUSG00000005687	68183	Bcas2	breast carcinoma amplified sequence 2 [Source:MGI Symbol;Acc:MGI:1915433]	0.908021	5.86711	42.012	9.0713e-11	8.04757e-10
ENSMUSG00000040706	75986	Agmat	agmatine ureohydrolase (agmatinase) [Source:MGI Symbol;Acc:MGI:1923236]	1.99592	0.860494	41.999	9.13221e-11	8.09393e-10
ENSMUSG00000024430	71132	Cabyr	calcium-binding tyrosine-(Y)-phosphorylation regulated (fibrousheathin 2) [Source:MGI Symbol;Acc:MGI:1918382]	-0.924005	4.29351	41.9987	9.13329e-11	8.09393e-10
ENSMUSG00000034751	328329	Mast4	microtubule associated serine/threonine kinase family member 4 [Source:MGI Symbol;Acc:MGI:1918885]	-1.26638	4.69375	41.9968	9.14233e-11	8.09763e-10
ENSMUSG00000033149	208177	Phldb2	pleckstrin homology like domain, family B, member 2 [Source:MGI Symbol;Acc:MGI:2444981]	-2.13707	1.95342	41.9902	9.1734e-11	8.12083e-10
ENSMUSG00000000581	57316	C1d	C1D nuclear receptor co-repressor [Source:MGI Symbol;Acc:MGI:1927354]	1.15659	7.3001	41.9882	9.18263e-11	8.12467e-10
ENSMUSG00000047412	235132	Zbtb44	zinc finger and BTB domain containing 44 [Source:MGI Symbol;Acc:MGI:1925123]	-1.26831	3.37144	41.9797	9.22274e-11	8.15583e-10
ENSMUSG00000020225	68212	Tmbim4	transmembrane BAX inhibitor motif containing 4 [Source:MGI Symbol;Acc:MGI:1915462]	0.925358	6.34959	41.9706	9.26548e-11	8.1867e-10
ENSMUSG00000044320	73598	1700001O22Rik	RIKEN cDNA 1700001O22 gene [Source:MGI Symbol;Acc:MGI:1923631]	2.02241	1.20348	41.9702	9.2675e-11	8.1867e-10
ENSMUSG00000023106	68184	Denr	density-regulated protein [Source:MGI Symbol;Acc:MGI:1915434]	1.00309	6.0689	41.9575	9.32803e-11	8.2358e-10
ENSMUSG00000027316	14588	Gfra4	glial cell line derived neurotrophic factor family receptor alpha 4 [Source:MGI Symbol;Acc:MGI:1341873]	0.867666	5.56822	41.9418	9.4032e-11	8.29777e-10
ENSMUSG00000022912	19128	Pros1	protein S (alpha) [Source:MGI Symbol;Acc:MGI:1095733]	-1.94062	3.16235	41.9342	9.43956e-11	8.32543e-10
ENSMUSG00000002107	14007	Celf2	CUGBP, Elav-like family member 2 [Source:MGI Symbol;Acc:MGI:1338822]	-1.04344	8.75601	41.8997	9.60781e-11	8.46934e-10
ENSMUSG00000019960	67603	Dusp6	dual specificity phosphatase 6 [Source:MGI Symbol;Acc:MGI:1914853]	-1.15838	5.96206	41.8717	9.74612e-11	8.5867e-10
ENSMUSG00000022353	211401	Mtss1	metastasis suppressor 1 [Source:MGI Symbol;Acc:MGI:2384818]	0.955015	4.7172	41.8581	9.81429e-11	8.63984e-10
ENSMUSG00000000934	72960	Top1mt	DNA topoisomerase 1, mitochondrial [Source:MGI Symbol;Acc:MGI:1920210]	1.28844	2.46169	41.8576	9.81682e-11	8.63984e-10
ENSMUSG00000025991	227231	Cps1	carbamoyl-phosphate synthetase 1 [Source:MGI Symbol;Acc:MGI:891996]	2.39451	0.976081	41.847	9.86997e-11	8.67813e-10
ENSMUSG00000047344	236285	Lancl3	LanC lantibiotic synthetase component C-like 3 (bacterial) [Source:MGI Symbol;Acc:MGI:2443335]	1.2717	2.98118	41.8465	9.87248e-11	8.67813e-10
ENSMUSG00000034160	108155	Ogt	O-linked N-acetylglucosamine (GlcNAc) transferase (UDP-N-acetylglucosamine:polypeptide-N-acetylglucosaminyl transferase) [Source:MGI Symbol;Acc:MGI:1339639]	-1.46335	7.28115	41.8459	9.87598e-11	8.67813e-10
ENSMUSG00000061111	192173	Fam195b	family with sequence similarity 195, member B [Source:MGI Symbol;Acc:MGI:2384752]	0.974202	6.47688	41.8367	9.92211e-11	8.71406e-10
ENSMUSG00000021764	17993	Ndufs4	NADH dehydrogenase (ubiquinone) Fe-S protein 4 [Source:MGI Symbol;Acc:MGI:1343135]	1.22319	8.13982	41.8325	9.94371e-11	8.72842e-10
ENSMUSG00000023274	12504	Cd4	CD4 antigen [Source:MGI Symbol;Acc:MGI:88335]	2.47047	4.60537	41.8306	9.95336e-11	8.73229e-10
ENSMUSG00000027007	70599	Ssfa2	sperm specific antigen 2 [Source:MGI Symbol;Acc:MGI:1917849]	-2.16304	4.74991	41.8294	9.95934e-11	8.73293e-10
ENSMUSG00000040331	67872	Nsmce4a	NSE4 homolog A, SMC5-SMC6 complex component [Source:MGI Symbol;Acc:MGI:1915122]	1.08411	4.90204	41.8182	1.00169e-10	8.77875e-10
ENSMUSG00000024041	12954	Cryaa	crystallin, alpha A [Source:MGI Symbol;Acc:MGI:88515]	3.05172	-0.142907	41.811	1.00537e-10	8.80361e-10
ENSMUSG00000029868	NA	Trpv6	transient receptor potential cation channel, subfamily V, member 6 [Source:MGI Symbol;Acc:MGI:1927259]	-1.76546	3.25782	41.8104	1.00567e-10	8.80361e-10
ENSMUSG00000025578	30951	Cbx8	chromobox 8 [Source:MGI Symbol;Acc:MGI:1353589]	1.64532	2.13834	41.8095	1.00611e-10	8.80361e-10
ENSMUSG00000066306	101706	Numa1	nuclear mitotic apparatus protein 1 [Source:MGI Symbol;Acc:MGI:2443665]	-1.1323	4.54434	41.7967	1.01276e-10	8.85709e-10
ENSMUSG00000022940	56176	Pigp	phosphatidylinositol glycan anchor biosynthesis, class P [Source:MGI Symbol;Acc:MGI:1860433]	1.05387	4.63355	41.786	1.0183e-10	8.90087e-10
ENSMUSG00000027896	229699	Slc16a4	solute carrier family 16 (monocarboxylic acid transporters), member 4 [Source:MGI Symbol;Acc:MGI:2385183]	-3.38966	0.584728	41.7756	1.02373e-10	8.94366e-10
ENSMUSG00000022801	70144	Lrch3	leucine-rich repeats and calponin homology (CH) domain containing 3 [Source:MGI Symbol;Acc:MGI:1917394]	-1.5719	3.65071	41.7661	1.02869e-10	8.98231e-10
ENSMUSG00000000392	14089	Fap	fibroblast activation protein [Source:MGI Symbol;Acc:MGI:109608]	-2.90877	1.32918	41.7619	1.03091e-10	8.99693e-10
ENSMUSG00000075705	27361	Msrb1	methionine sulfoxide reductase B1 [Source:MGI Symbol;Acc:MGI:1351642]	1.02645	4.15798	41.7547	1.03472e-10	9.02193e-10
ENSMUSG00000021337	214189	Scgn	secretagogin, EF-hand calcium binding protein [Source:MGI Symbol;Acc:MGI:2384873]	2.07688	1.05588	41.7545	1.03486e-10	9.02193e-10
ENSMUSG00000014776	78688	Nol3	nucleolar protein 3 (apoptosis repressor with CARD domain) [Source:MGI Symbol;Acc:MGI:1925938]	1.76012	1.87669	41.7456	1.03956e-10	9.0582e-10
ENSMUSG00000049252	94217	Lrp1b	low density lipoprotein-related protein 1B (deleted in tumors) [Source:MGI Symbol;Acc:MGI:2151136]	-1.5293	5.69484	41.7436	1.04065e-10	9.06289e-10
ENSMUSG00000055612	66953	Cdca7	cell division cycle associated 7 [Source:MGI Symbol;Acc:MGI:1914203]	1.36322	2.45592	41.7084	1.05953e-10	9.2225e-10
ENSMUSG00000040747	12508	Cd53	CD53 antigen [Source:MGI Symbol;Acc:MGI:88341]	-1.82018	5.10172	41.6985	1.06491e-10	9.26451e-10
ENSMUSG00000072966	245607	Gprasp2	G protein-coupled receptor associated sorting protein 2 [Source:MGI Symbol;Acc:MGI:2442071]	1.39872	7.00204	41.6733	1.07874e-10	9.37995e-10
ENSMUSG00000026820	96979	Ptges2	prostaglandin E synthase 2 [Source:MGI Symbol;Acc:MGI:1917592]	0.942222	5.1483	41.6674	1.082e-10	9.40333e-10
ENSMUSG00000032384	214897	Csnk1g1	casein kinase 1, gamma 1 [Source:MGI Symbol;Acc:MGI:2660884]	-1.16043	5.26539	41.656	1.08832e-10	9.4533e-10
ENSMUSG00000027999	66350	Pla2g12a	phospholipase A2, group XIIA [Source:MGI Symbol;Acc:MGI:1913600]	0.986113	3.95304	41.6548	1.08899e-10	9.45423e-10
ENSMUSG00000001794	12336	Capns1	calpain, small subunit 1 [Source:MGI Symbol;Acc:MGI:88266]	0.991815	7.42308	41.6491	1.09217e-10	9.47689e-10
ENSMUSG00000019254	232807	Ppp1r12c	protein phosphatase 1, regulatory (inhibitor) subunit 12C [Source:MGI Symbol;Acc:MGI:1924258]	1.07608	5.21049	41.6458	1.09399e-10	9.48775e-10
ENSMUSG00000018287	216873	Spag7	sperm associated antigen 7 [Source:MGI Symbol;Acc:MGI:107380]	0.911886	6.13569	41.6373	1.09875e-10	9.52405e-10
ENSMUSG00000056529	19204	Ptafr	platelet-activating factor receptor [Source:MGI Symbol;Acc:MGI:106066]	-2.30845	2.77408	41.6108	1.11377e-10	9.64923e-10
ENSMUSG00000075224	241528	Lrrc55	leucine rich repeat containing 55 [Source:MGI Symbol;Acc:MGI:2685197]	-1.10734	4.4679	41.5929	1.12401e-10	9.73285e-10
ENSMUSG00000028478	12757	Clta	clathrin, light polypeptide (Lca) [Source:MGI Symbol;Acc:MGI:894297]	1.07278	7.21149	41.5659	1.13962e-10	9.86285e-10
ENSMUSG00000029468	18439	P2rx7	purinergic receptor P2X, ligand-gated ion channel, 7 [Source:MGI Symbol;Acc:MGI:1339957]	-1.94276	2.22697	41.5573	1.14466e-10	9.90135e-10
ENSMUSG00000053475	21930	Tnfaip6	tumor necrosis factor alpha induced protein 6 [Source:MGI Symbol;Acc:MGI:1195266]	-2.00262	3.51032	41.5444	1.15221e-10	9.9615e-10
ENSMUSG00000047123	106759	Ticam1	toll-like receptor adaptor molecule 1 [Source:MGI Symbol;Acc:MGI:2147032]	-1.46803	1.73562	41.5253	1.16353e-10	1.00541e-09
ENSMUSG00000029304	20750	Spp1	secreted phosphoprotein 1 [Source:MGI Symbol;Acc:MGI:98389]	1.12593	4.62865	41.511	1.17208e-10	1.01228e-09
ENSMUSG00000022437	68653	Samm50	SAMM50 sorting and assembly machinery component [Source:MGI Symbol;Acc:MGI:1915903]	1.03672	4.54721	41.5058	1.17524e-10	1.01448e-09
ENSMUSG00000064351	17708	mt-Co1	mitochondrially encoded cytochrome c oxidase I [Source:MGI Symbol;Acc:MGI:102504]	-3.96548	13.8337	41.4945	1.182e-10	1.01978e-09
ENSMUSG00000038587	83397	Akap12	A kinase (PRKA) anchor protein (gravin) 12 [Source:MGI Symbol;Acc:MGI:1932576]	-1.07038	3.9506	41.4693	1.19737e-10	1.03251e-09
ENSMUSG00000004264	12034	Phb2	prohibitin 2 [Source:MGI Symbol;Acc:MGI:102520]	0.966917	5.21119	41.4672	1.19868e-10	1.0331e-09
ENSMUSG00000024843	12660	Chka	choline kinase alpha [Source:MGI Symbol;Acc:MGI:107760]	-1.13802	5.71797	41.4635	1.2009e-10	1.03448e-09
ENSMUSG00000029777	353172	Gars	glycyl-tRNA synthetase [Source:MGI Symbol;Acc:MGI:2449057]	1.08545	7.19833	41.4482	1.21033e-10	1.04207e-09
ENSMUSG00000027099	53375	Mtx2	metaxin 2 [Source:MGI Symbol;Acc:MGI:1859652]	1.30896	5.49404	41.3884	1.24795e-10	1.07389e-09
ENSMUSG00000097535	NA	Gm26592	predicted gene, 26592 [Source:MGI Symbol;Acc:MGI:5477086]	2.62764	-0.387491	41.3808	1.25281e-10	1.07752e-09
ENSMUSG00000048277	20973	Syngr2	synaptogyrin 2 [Source:MGI Symbol;Acc:MGI:1328324]	-2.04201	2.70642	41.3647	1.26315e-10	1.08581e-09
ENSMUSG00000024524	14680	Gnal	guanine nucleotide binding protein, alpha stimulating, olfactory type [Source:MGI Symbol;Acc:MGI:95774]	1.1264	8.05625	41.3638	1.26376e-10	1.08581e-09
ENSMUSG00000022847	21832	Thpo	thrombopoietin [Source:MGI Symbol;Acc:MGI:101875]	-2.73131	2.18957	41.3563	1.26862e-10	1.08943e-09
ENSMUSG00000034825	78593	Nrip3	nuclear receptor interacting protein 3 [Source:MGI Symbol;Acc:MGI:1925843]	0.897899	7.29839	41.349	1.27336e-10	1.09294e-09
ENSMUSG00000051768	22594	Xrcc1	X-ray repair complementing defective repair in Chinese hamster cells 1 [Source:MGI Symbol;Acc:MGI:99137]	1.22581	2.8922	41.3446	1.27627e-10	1.09466e-09
ENSMUSG00000034998	14236	Foxn2	forkhead box N2 [Source:MGI Symbol;Acc:MGI:1347478]	-1.39533	4.26689	41.3439	1.27668e-10	1.09466e-09
ENSMUSG00000031954	23837	Cfdp1	craniofacial development protein 1 [Source:MGI Symbol;Acc:MGI:1344403]	1.03125	7.56682	41.3361	1.28178e-10	1.09847e-09
ENSMUSG00000090291	278795	Lrrc10b	leucine rich repeat containing 10B [Source:MGI Symbol;Acc:MGI:2685551]	1.32445	4.13557	41.3263	1.28822e-10	1.10341e-09
ENSMUSG00000028222	12307	Calb1	calbindin 1 [Source:MGI Symbol;Acc:MGI:88248]	1.26235	7.86688	41.3111	1.29828e-10	1.1112e-09
ENSMUSG00000047146	52463	Tet1	tet methylcytosine dioxygenase 1 [Source:MGI Symbol;Acc:MGI:1098693]	-1.05522	4.78421	41.3106	1.29865e-10	1.1112e-09
ENSMUSG00000015126	68327	Tsr3	TSR3 20S rRNA accumulation [Source:MGI Symbol;Acc:MGI:1915577]	0.977113	3.05371	41.284	1.31643e-10	1.12584e-09
ENSMUSG00000061024	59014	Rrs1	ribosome biogenesis regulator 1 [Source:MGI Symbol;Acc:MGI:1929721]	1.1718	3.3251	41.282	1.31779e-10	1.12642e-09
ENSMUSG00000008136	14200	Fhl2	four and a half LIM domains 2 [Source:MGI Symbol;Acc:MGI:1338762]	-1.23787	5.08213	41.2793	1.31956e-10	1.12735e-09
ENSMUSG00000015653	74051	Steap2	six transmembrane epithelial antigen of prostate 2 [Source:MGI Symbol;Acc:MGI:1921301]	0.972279	4.4781	41.2722	1.32437e-10	1.13089e-09
ENSMUSG00000041633	207474	Kctd12b	potassium channel tetramerisation domain containing 12b [Source:MGI Symbol;Acc:MGI:2444667]	-2.42734	1.8378	41.2698	1.32599e-10	1.13155e-09
ENSMUSG00000025868	67044	Higd2a	HIG1 domain family, member 2A [Source:MGI Symbol;Acc:MGI:1914294]	1.15208	7.42059	41.2691	1.32651e-10	1.13155e-09
ENSMUSG00000051232	195040	Tmem199	transmembrane protein 199 [Source:MGI Symbol;Acc:MGI:2144113]	1.07468	5.75746	41.2675	1.32755e-10	1.13185e-09
ENSMUSG00000004730	13733	Adgre1	adhesion G protein-coupled receptor E1 [Source:MGI Symbol;Acc:MGI:106912]	-2.19715	3.08416	41.2546	1.3364e-10	1.13882e-09
ENSMUSG00000026377	67949	Nifk	nucleolar protein interacting with the FHA domain of MKI67 [Source:MGI Symbol;Acc:MGI:1915199]	0.878465	5.46001	41.2446	1.34323e-10	1.14405e-09
ENSMUSG00000027091	69082	Zc3h15	zinc finger CCCH-type containing 15 [Source:MGI Symbol;Acc:MGI:1919747]	0.925341	6.96013	41.2309	1.35267e-10	1.1515e-09
ENSMUSG00000089922	NA	Gm43517	predicted gene 43517 [Source:MGI Symbol;Acc:MGI:5663654]	1.57858	4.03116	41.2246	1.35702e-10	1.15461e-09
ENSMUSG00000037295	100017	Ldlrap1	low density lipoprotein receptor adaptor protein 1 [Source:MGI Symbol;Acc:MGI:2140175]	-2.71221	0.895162	41.2222	1.35871e-10	1.15546e-09
ENSMUSG00000034235	78787	Usp54	ubiquitin specific peptidase 54 [Source:MGI Symbol;Acc:MGI:1926037]	-1.18071	5.31558	41.215	1.3637e-10	1.15911e-09
ENSMUSG00000078572	NA	Ndufaf8	NADH dehydrogenase (ubiquinone) 1 alpha subcomplex assembly factor 8 [Source:MGI Symbol;Acc:MGI:1913676]	1.42654	3.3862	41.1891	1.38188e-10	1.17396e-09
ENSMUSG00000097347	NA	Gm17275	predicted gene, 17275 [Source:MGI Symbol;Acc:MGI:4936909]	-3.85841	-0.448889	41.1498	1.41e-10	1.19724e-09
ENSMUSG00000054944	NA	5330416C01Rik	RIKEN cDNA 5330416C01 gene [Source:MGI Symbol;Acc:MGI:2685378]	-2.69971	0.279912	41.1466	1.41228e-10	1.19857e-09
ENSMUSG00000084628	NA	Gm22613	predicted gene, 22613 [Source:MGI Symbol;Acc:MGI:5452390]	-4.48993	0.229911	41.1447	1.41368e-10	1.19914e-09
ENSMUSG00000036766	227325	Dner	delta/notch-like EGF repeat containing [Source:MGI Symbol;Acc:MGI:2152889]	1.30967	8.57177	41.11	1.43898e-10	1.21998e-09
ENSMUSG00000046516	12856	Cox17	cytochrome c oxidase assembly protein 17 [Source:MGI Symbol;Acc:MGI:1333806]	1.76807	3.79006	41.0931	1.45147e-10	1.22994e-09
ENSMUSG00000076498	NA	Trbc2	T cell receptor beta, constant 2 [Source:MGI Symbol;Acc:MGI:4835227]	-1.49705	3.8621	41.092	1.45228e-10	1.23e-09
ENSMUSG00000025869	28126	Nop16	NOP16 nucleolar protein [Source:MGI Symbol;Acc:MGI:107862]	0.828507	5.42601	41.0493	1.4844e-10	1.25657e-09
ENSMUSG00000058325	330662	Dock1	dedicator of cytokinesis 1 [Source:MGI Symbol;Acc:MGI:2429765]	-2.49057	4.85703	41.0393	1.49198e-10	1.26234e-09
ENSMUSG00000001123	16859	Lgals9	lectin, galactose binding, soluble 9 [Source:MGI Symbol;Acc:MGI:109496]	-1.72922	3.74761	41.0247	1.50314e-10	1.27114e-09
ENSMUSG00000059734	225887	Ndufs8	NADH dehydrogenase (ubiquinone) Fe-S protein 8 [Source:MGI Symbol;Acc:MGI:2385079]	1.18262	8.13192	41.0223	1.505e-10	1.27207e-09
ENSMUSG00000002324	56739	Rec8	REC8 meiotic recombination protein [Source:MGI Symbol;Acc:MGI:1929645]	1.93059	1.13445	41.0182	1.50815e-10	1.27408e-09
ENSMUSG00000007739	12464	Cct4	chaperonin containing Tcp1, subunit 4 (delta) [Source:MGI Symbol;Acc:MGI:104689]	0.908159	6.78231	41.0163	1.50965e-10	1.2747e-09
ENSMUSG00000097182	NA	A830009L08Rik	RIKEN cDNA A830009L08 gene [Source:MGI Symbol;Acc:MGI:2443762]	-1.70314	2.94873	40.9993	1.52286e-10	1.2852e-09
ENSMUSG00000031506	320139	Ptpn7	protein tyrosine phosphatase, non-receptor type 7 [Source:MGI Symbol;Acc:MGI:2156893]	2.57187	0.616379	40.9604	1.55343e-10	1.31033e-09
ENSMUSG00000020640	20403	Itsn2	intersectin 2 [Source:MGI Symbol;Acc:MGI:1338049]	-0.913461	4.2567	40.9558	1.55712e-10	1.31278e-09
ENSMUSG00000014195	56354	Dnajc7	DnaJ heat shock protein family (Hsp40) member C7 [Source:MGI Symbol;Acc:MGI:1928373]	0.771684	6.81512	40.9334	1.57506e-10	1.32723e-09
ENSMUSG00000036114	69961	Rpp25l	ribonuclease P/MRP 25 subunit-like [Source:MGI Symbol;Acc:MGI:1917211]	1.13186	3.84191	40.9027	1.60002e-10	1.34758e-09
ENSMUSG00000079022	69700	Col22a1	collagen, type XXII, alpha 1 [Source:MGI Symbol;Acc:MGI:1916950]	-2.15126	0.758651	40.8956	1.60585e-10	1.35181e-09
ENSMUSG00000041567	68054	Serpina12	serine (or cysteine) peptidase inhibitor, clade A (alpha-1 antiproteinase, antitrypsin), member 12 [Source:MGI Symbol;Acc:MGI:1915304]	2.79892	-0.118432	40.8569	1.63797e-10	1.37815e-09
ENSMUSG00000031698	213435	Mylk3	myosin light chain kinase 3 [Source:MGI Symbol;Acc:MGI:2443063]	-2.61512	1.17714	40.855	1.63953e-10	1.37877e-09
ENSMUSG00000032449	192287	Slc25a36	solute carrier family 25, member 36 [Source:MGI Symbol;Acc:MGI:1924909]	-1.1431	6.08779	40.854	1.64039e-10	1.37879e-09
ENSMUSG00000029623	231887	Pdap1	PDGFA associated protein 1 [Source:MGI Symbol;Acc:MGI:2448536]	1.17045	6.02633	40.8508	1.64308e-10	1.38035e-09
ENSMUSG00000028677	66743	Rnf220	ring finger protein 220 [Source:MGI Symbol;Acc:MGI:1913993]	1.05025	6.05613	40.8486	1.64494e-10	1.38122e-09
ENSMUSG00000059498	14131	Fcgr3	Fc receptor, IgG, low affinity III [Source:MGI Symbol;Acc:MGI:95500]	-1.6051	5.07366	40.845	1.64793e-10	1.38303e-09
ENSMUSG00000040711	268396	Sh3pxd2b	SH3 and PX domains 2B [Source:MGI Symbol;Acc:MGI:2442062]	-1.30317	3.36028	40.8324	1.6586e-10	1.39128e-09
ENSMUSG00000030614	68472	Tmem126b	transmembrane protein 126B [Source:MGI Symbol;Acc:MGI:1915722]	0.886579	5.20661	40.8296	1.66096e-10	1.39256e-09
ENSMUSG00000038679	83925	Trps1	transcriptional repressor GATA binding 1 [Source:MGI Symbol;Acc:MGI:1927616]	-1.23172	5.44243	40.8257	1.66431e-10	1.39467e-09
ENSMUSG00000029722	231801	Agfg2	ArfGAP with FG repeats 2 [Source:MGI Symbol;Acc:MGI:2443267]	0.925996	4.81513	40.8088	1.67872e-10	1.40603e-09
ENSMUSG00000025128	59058	Bhlhe22	basic helix-loop-helix family, member e22 [Source:MGI Symbol;Acc:MGI:1930001]	-2.01468	3.86374	40.7862	1.69828e-10	1.4217e-09
ENSMUSG00000051041	244198	Olfml1	olfactomedin-like 1 [Source:MGI Symbol;Acc:MGI:2679264]	-2.195	3.20069	40.7721	1.71059e-10	1.43128e-09
ENSMUSG00000054252	14184	Fgfr3	fibroblast growth factor receptor 3 [Source:MGI Symbol;Acc:MGI:95524]	-2.47356	5.89753	40.771	1.71158e-10	1.43128e-09
ENSMUSG00000024583	53382	Txnl1	thioredoxin-like 1 [Source:MGI Symbol;Acc:MGI:1860078]	1.00613	6.18515	40.7701	1.71231e-10	1.43128e-09
ENSMUSG00000026924	227648	Sec16a	SEC16 homolog A, endoplasmic reticulum export factor [Source:MGI Symbol;Acc:MGI:2139207]	-0.85227	4.78715	40.6975	1.77711e-10	1.4847e-09
ENSMUSG00000043557	74762	Mdga1	MAM domain containing glycosylphosphatidylinositol anchor 1 [Source:MGI Symbol;Acc:MGI:1922012]	-1.4436	3.83385	40.6931	1.78118e-10	1.48736e-09
ENSMUSG00000027669	14696	Gnb4	guanine nucleotide binding protein (G protein), beta 4 [Source:MGI Symbol;Acc:MGI:104581]	-0.749568	6.11818	40.6783	1.79471e-10	1.4979e-09
ENSMUSG00000062963	66155	Ufc1	ubiquitin-fold modifier conjugating enzyme 1 [Source:MGI Symbol;Acc:MGI:1913405]	0.953846	7.03581	40.6641	1.8078e-10	1.50808e-09
ENSMUSG00000001120	59093	Pcbp3	poly(rC) binding protein 3 [Source:MGI Symbol;Acc:MGI:1890470]	1.0164	5.2967	40.6559	1.81538e-10	1.51363e-09
ENSMUSG00000037139	242702	Myom3	myomesin family, member 3 [Source:MGI Symbol;Acc:MGI:2685280]	-2.69062	2.64109	40.6483	1.82244e-10	1.51876e-09
ENSMUSG00000041351	110351	Rap1gap	Rap1 GTPase-activating protein [Source:MGI Symbol;Acc:MGI:109338]	1.17027	4.73027	40.6424	1.82793e-10	1.52246e-09
ENSMUSG00000047141	72020	Zfp654	zinc finger protein 654 [Source:MGI Symbol;Acc:MGI:1919270]	-1.15875	3.49923	40.6416	1.82872e-10	1.52246e-09
ENSMUSG00000086324	NA	Gm15564	predicted gene 15564 [Source:MGI Symbol;Acc:MGI:3783013]	1.53676	11.1039	40.6362	1.83373e-10	1.52588e-09
[truncated: 14,635 more rows]
