# Supplementary material for: The Differences in Local Translatome across Distinct Neuron Types Is Mediated by Both Baseline Cellular Differences and Post-transcriptional Mechanisms
Source: eNeuro. 2019 Feb 4;5(6):ENEURO.0320-18.2018. doi: 10.1523/ENEURO.0320-18.2018 (PMC6361723; doi:10.1523/ENEURO.0320-18.2018)
Supplement: Figure 2-3 — DE results between TRAP RBP4-TRAP and TRAP VGAT-TRAP. Table of differential expression results between RBP4-TRAP and TRAP VGAT-TRAP. Genes with transcripts enriched in each cell type compared with each other. Column names are as in Figure 2-1. Download Figure 2-3, XLS file. [file sup_enu-eN-NWR-0320-18-s04.xls]

## Sheet: Supplemental Table 3 Rough DE_R
ensembl_gene_id	entrezgene	external_gene_name	description	logFC	logCPM	LR	PValue	FDR
ENSMUSG00000038370	66425	Pcp4l1	Purkinje cell protein 4-like 1 [Source:MGI Symbol;Acc:MGI:1913675]	-4.82161	7.16726	574.578	5.6686e-127	7.96891e-123
ENSMUSG00000041911	13390	Dlx1	distal-less homeobox 1 [Source:MGI Symbol;Acc:MGI:94901]	-5.19778	4.29782	564.585	8.45761e-125	5.94486e-121
ENSMUSG00000071234	627191	Syndig1l	synapse differentiation inducing 1 like [Source:MGI Symbol;Acc:MGI:2685107]	-4.61323	5.58531	419.375	3.33819e-93	1.56428e-89
ENSMUSG00000068859	381373	Sp9	trans-acting transcription factor 9 [Source:MGI Symbol;Acc:MGI:3574660]	-5.00742	3.23993	400.301	4.73563e-89	1.66434e-85
ENSMUSG00000032020	72828	Ubash3b	ubiquitin associated and SH3 domain containing, B [Source:MGI Symbol;Acc:MGI:1920078]	-3.65842	6.50336	359.714	3.25051e-80	9.13914e-77
ENSMUSG00000029755	13395	Dlx5	distal-less homeobox 5 [Source:MGI Symbol;Acc:MGI:101926]	-5.69311	2.59412	339.369	8.75473e-76	2.05123e-72
ENSMUSG00000029754	13396	Dlx6	distal-less homeobox 6 [Source:MGI Symbol;Acc:MGI:101927]	-5.46398	2.31527	335.624	5.72794e-75	1.15033e-71
ENSMUSG00000086496	NA	Gm14204	predicted gene 14204 [Source:MGI Symbol;Acc:MGI:3651576]	-4.39728	3.63858	332.476	2.77632e-74	4.87869e-71
ENSMUSG00000039607	207181	Rbms3	RNA binding motif, single stranded interacting protein [Source:MGI Symbol;Acc:MGI:2444477]	-4.25531	4.86432	331.894	3.71827e-74	5.80793e-71
ENSMUSG00000074622	16658	Mafb	v-maf musculoaponeurotic fibrosarcoma oncogene family, protein B (avian) [Source:MGI Symbol;Acc:MGI:104555]	-4.11151	4.43074	313.787	3.26758e-70	4.59357e-67
ENSMUSG00000026890	16874	Lhx6	LIM homeobox protein 6 [Source:MGI Symbol;Acc:MGI:1306803]	-4.86552	4.59927	311.342	1.11379e-69	1.42343e-66
ENSMUSG00000068696	64378	Gpr88	G-protein coupled receptor 88 [Source:MGI Symbol;Acc:MGI:1927653]	-3.14245	7.2095	304.009	4.40985e-68	5.16614e-65
ENSMUSG00000046178	18231	Nxph1	neurexophilin 1 [Source:MGI Symbol;Acc:MGI:107492]	-4.27735	6.54998	303.594	5.42845e-68	5.87024e-65
ENSMUSG00000027849	54524	Syt6	synaptotagmin VI [Source:MGI Symbol;Acc:MGI:1859544]	-3.92154	4.74313	290.452	3.96351e-65	3.97993e-62
ENSMUSG00000021680	12919	Crhbp	corticotropin releasing hormone binding protein [Source:MGI Symbol;Acc:MGI:88497]	-4.38484	5.99256	290.288	4.30408e-65	4.03378e-62
ENSMUSG00000019772	22353	Vip	vasoactive intestinal polypeptide [Source:MGI Symbol;Acc:MGI:98933]	-5.8353	7.29396	289.552	6.22427e-65	5.4688e-62
ENSMUSG00000062309	102614	Rpp25	ribonuclease P/MRP 25 subunit [Source:MGI Symbol;Acc:MGI:2143151]	-4.41299	4.69538	287.085	2.14682e-64	1.77529e-61
ENSMUSG00000025221	80906	Kcnip2	Kv channel-interacting protein 2 [Source:MGI Symbol;Acc:MGI:2135916]	-2.21756	6.58161	286.414	3.00573e-64	2.34747e-61
ENSMUSG00000090063	NA	Dlx6os1	distal-less homeobox 6, opposite strand 1 [Source:MGI Symbol;Acc:MGI:2443217]	-5.50109	4.33976	285.144	5.68384e-64	4.20544e-61
ENSMUSG00000030310	232333	Slc6a1	solute carrier family 6 (neurotransmitter transporter, GABA), member 1 [Source:MGI Symbol;Acc:MGI:95627]	-4.17073	8.56957	281.423	3.67755e-63	2.58495e-60
ENSMUSG00000020042	74007	Btbd11	BTB (POZ) domain containing 11 [Source:MGI Symbol;Acc:MGI:1921257]	-3.98309	5.1726	273.718	1.75593e-61	1.17547e-58
ENSMUSG00000034324	208213	Tmem132c	transmembrane protein 132C [Source:MGI Symbol;Acc:MGI:2443061]	-3.93547	3.03899	266.229	7.52877e-60	4.75957e-57
ENSMUSG00000049866	320982	Arl4c	ADP-ribosylation factor-like 4C [Source:MGI Symbol;Acc:MGI:2445172]	-2.97464	5.22658	266.162	7.78704e-60	4.75957e-57
ENSMUSG00000026787	14417	Gad2	glutamic acid decarboxylase 2 [Source:MGI Symbol;Acc:MGI:95634]	-4.71834	8.11962	247.585	8.72733e-56	5.11204e-53
ENSMUSG00000045731	18155	Pnoc	prepronociceptin [Source:MGI Symbol;Acc:MGI:105308]	-5.12722	4.82589	244.142	4.91505e-55	2.76383e-52
ENSMUSG00000035681	268345	Kcnc2	potassium voltage gated channel, Shaw-related subfamily, member 2 [Source:MGI Symbol;Acc:MGI:96668]	-3.33367	7.00046	240.957	2.43286e-54	1.31543e-51
ENSMUSG00000035277	11878	Arx	aristaless related homeobox [Source:MGI Symbol;Acc:MGI:1097716]	-4.82533	3.53288	234.992	4.86209e-53	2.53153e-50
ENSMUSG00000021214	105349	Akr1c18	aldo-keto reductase family 1, member C18 [Source:MGI Symbol;Acc:MGI:2145420]	-5.61157	2.68412	232.358	1.82436e-52	9.15961e-50
ENSMUSG00000025400	21334	Tac2	tachykinin 2 [Source:MGI Symbol;Acc:MGI:98476]	-5.31939	5.04018	231.363	3.00613e-52	1.45725e-49
ENSMUSG00000048776	19227	Pthlh	parathyroid hormone-like peptide [Source:MGI Symbol;Acc:MGI:97800]	-5.87831	2.76041	228.696	1.14735e-51	5.3765e-49
ENSMUSG00000026023	271697	Cdk15	cyclin-dependent kinase 15 [Source:MGI Symbol;Acc:MGI:3583944]	-5.982	0.42729	226.87	2.87095e-51	1.30193e-48
ENSMUSG00000038805	20473	Six3	sine oculis-related homeobox 3 [Source:MGI Symbol;Acc:MGI:102764]	-5.62691	2.63891	224.524	9.32565e-51	4.09688e-48
ENSMUSG00000027495	67017	Fam210b	family with sequence similarity 210, member B [Source:MGI Symbol;Acc:MGI:1914267]	-2.80207	4.27482	223.19	1.82205e-50	7.76194e-48
ENSMUSG00000055435	17132	Maf	avian musculoaponeurotic fibrosarcoma oncogene homolog [Source:MGI Symbol;Acc:MGI:96909]	-3.73085	5.53661	220.778	6.11755e-50	2.52942e-47
ENSMUSG00000047344	236285	Lancl3	LanC lantibiotic synthetase component C-like 3 (bacterial) [Source:MGI Symbol;Acc:MGI:2443335]	-3.40429	2.55636	216.023	6.66723e-49	2.67794e-46
ENSMUSG00000028464	22004	Tpm2	tropomyosin 2, beta [Source:MGI Symbol;Acc:MGI:98810]	-4.39507	2.69848	213.613	2.23691e-48	8.73512e-46
ENSMUSG00000058975	16502	Kcnc1	potassium voltage gated channel, Shaw-related subfamily, member 1 [Source:MGI Symbol;Acc:MGI:96667]	-2.93414	6.82987	210.849	8.96707e-48	3.407e-45
ENSMUSG00000068220	16852	Lgals1	lectin, galactose binding, soluble 1 [Source:MGI Symbol;Acc:MGI:96777]	-3.99819	5.08259	209.585	1.69191e-47	6.25919e-45
ENSMUSG00000024524	14680	Gnal	guanine nucleotide binding protein, alpha stimulating, olfactory type [Source:MGI Symbol;Acc:MGI:95774]	-2.31209	7.73	209.291	1.96092e-47	7.06835e-45
ENSMUSG00000037610	72413	Kcnmb2	potassium large conductance calcium-activated channel, subfamily M, beta member 2 [Source:MGI Symbol;Acc:MGI:1919663]	-4.49495	3.2761	199.286	2.99013e-45	1.05088e-42
ENSMUSG00000045036	381107	Tmem232	transmembrane protein 232 [Source:MGI Symbol;Acc:MGI:2685786]	3.82806	2.73239	197.091	9.00879e-45	3.08892e-42
ENSMUSG00000031367	108012	Ap1s2	adaptor-related protein complex 1, sigma 2 subunit [Source:MGI Symbol;Acc:MGI:1889383]	-2.79729	5.83517	195.805	1.71953e-44	5.75552e-42
ENSMUSG00000068615	14617	Gjd2	gap junction protein, delta 2 [Source:MGI Symbol;Acc:MGI:1334209]	-4.06079	2.97643	194.09	4.07124e-44	1.33101e-41
ENSMUSG00000029819	109648	Npy	neuropeptide Y [Source:MGI Symbol;Acc:MGI:97374]	-4.94095	9.63404	193.685	4.98797e-44	1.59366e-41
ENSMUSG00000030337	22317	Vamp1	vesicle-associated membrane protein 1 [Source:MGI Symbol;Acc:MGI:1313276]	-2.07136	6.31512	193.091	6.72484e-44	2.10084e-41
ENSMUSG00000039313	209743	AF529169	cDNA sequence AF529169 [Source:MGI Symbol;Acc:MGI:2667167]	-4.28979	1.80282	192.385	9.58765e-44	2.93007e-41
ENSMUSG00000004151	14009	Etv1	ets variant 1 [Source:MGI Symbol;Acc:MGI:99254]	2.24471	5.85773	191.837	1.26306e-43	3.7779e-41
ENSMUSG00000034472	75141	Rasd2	RASD family, member 2 [Source:MGI Symbol;Acc:MGI:1922391]	-2.78427	6.66416	190.405	2.59328e-43	7.59507e-41
ENSMUSG00000026393	59125	Nek7	NIMA (never in mitosis gene a)-related expressed kinase 7 [Source:MGI Symbol;Acc:MGI:1890645]	-3.71701	6.55037	188.156	8.03048e-43	2.30393e-40
ENSMUSG00000055612	66953	Cdca7	cell division cycle associated 7 [Source:MGI Symbol;Acc:MGI:1914203]	-3.62246	1.97603	187.501	1.11637e-42	3.13878e-40
ENSMUSG00000050830	319922	Vwc2	von Willebrand factor C domain containing 2 [Source:MGI Symbol;Acc:MGI:2442987]	-3.90375	3.08991	182.839	1.16327e-41	3.20653e-39
ENSMUSG00000048988	243312	Elfn1	leucine rich repeat and fibronectin type III, extracellular 1 [Source:MGI Symbol;Acc:MGI:2442479]	-3.53041	3.1964	182.46	1.40699e-41	3.80373e-39
ENSMUSG00000045573	18619	Penk	preproenkephalin [Source:MGI Symbol;Acc:MGI:104629]	-4.92065	9.3518	181.82	1.94092e-41	5.14819e-39
ENSMUSG00000050473	76157	Slc35d3	solute carrier family 35, member D3 [Source:MGI Symbol;Acc:MGI:1923407]	-4.16605	2.15947	181.125	2.75278e-41	7.16642e-39
ENSMUSG00000037771	22348	Slc32a1	solute carrier family 32 (GABA vesicular transporter), member 1 [Source:MGI Symbol;Acc:MGI:1194488]	-4.30345	4.67265	180.169	4.45075e-41	1.13761e-38
ENSMUSG00000027859	18049	Ngf	nerve growth factor [Source:MGI Symbol;Acc:MGI:97321]	-4.22253	3.04833	179.777	5.42006e-41	1.36063e-38
ENSMUSG00000032269	15561	Htr3a	5-hydroxytryptamine (serotonin) receptor 3A [Source:MGI Symbol;Acc:MGI:96282]	-4.34924	3.36992	174.905	6.27916e-40	1.54864e-37
ENSMUSG00000085042	NA	Abhd11os	abhydrolase domain containing 11, opposite strand [Source:MGI Symbol;Acc:MGI:1917062]	-5.20555	1.56212	174.309	8.47601e-40	2.05441e-37
ENSMUSG00000030785	12862	Cox6a2	cytochrome c oxidase subunit VIa polypeptide 2 [Source:MGI Symbol;Acc:MGI:104649]	-3.75489	5.12773	172.2	2.44678e-39	5.82997e-37
ENSMUSG00000040133	381413	Gpr176	G protein-coupled receptor 176 [Source:MGI Symbol;Acc:MGI:2685858]	-2.78713	4.49872	171.192	4.06222e-39	9.51777e-37
ENSMUSG00000028971	12854	Cort	cortistatin [Source:MGI Symbol;Acc:MGI:109538]	-3.69192	3.96701	170.421	5.98739e-39	1.37985e-36
ENSMUSG00000031551	15930	Ido1	indoleamine 2,3-dioxygenase 1 [Source:MGI Symbol;Acc:MGI:96416]	-4.62366	2.7744	167.068	3.23294e-38	7.33044e-36
ENSMUSG00000036782	67455	Klhl13	kelch-like 13 [Source:MGI Symbol;Acc:MGI:1914705]	-3.24509	5.74725	165.005	9.12345e-38	2.03583e-35
ENSMUSG00000000214	21823	Th	tyrosine hydroxylase [Source:MGI Symbol;Acc:MGI:98735]	-4.65373	2.65724	164.771	1.02664e-37	2.25509e-35
ENSMUSG00000023064	20618	Sncg	synuclein, gamma [Source:MGI Symbol;Acc:MGI:1298397]	-4.73562	2.18281	164.032	1.48833e-37	3.21891e-35
ENSMUSG00000079669	NA	Gm17396	predicted gene, 17396 [Source:MGI Symbol;Acc:MGI:4937030]	-4.29771	1.73669	163.016	2.48192e-37	5.28648e-35
ENSMUSG00000048376	14062	F2r	coagulation factor II (thrombin) receptor [Source:MGI Symbol;Acc:MGI:101802]	-3.07987	2.41493	162.953	2.56133e-37	5.37421e-35
ENSMUSG00000020178	11540	Adora2a	adenosine A2a receptor [Source:MGI Symbol;Acc:MGI:99402]	-5.49981	2.9903	162.016	4.10405e-37	8.48452e-35
ENSMUSG00000031133	73341	Arhgef6	Rac/Cdc42 guanine nucleotide exchange factor (GEF) 6 [Source:MGI Symbol;Acc:MGI:1920591]	-3.70859	3.52676	158.628	2.25653e-36	4.59744e-34
ENSMUSG00000070880	14415	Gad1	glutamate decarboxylase 1 [Source:MGI Symbol;Acc:MGI:95632]	-4.49127	9.15822	158.482	2.42885e-36	4.87783e-34
ENSMUSG00000053519	70357	Kcnip1	Kv channel-interacting protein 1 [Source:MGI Symbol;Acc:MGI:1917607]	-3.83342	5.91575	158.314	2.64322e-36	5.23358e-34
ENSMUSG00000046207	104709	Pik3r6	phosphoinositide-3-kinase, regulatory subunit 6 [Source:MGI Symbol;Acc:MGI:2144613]	3.16631	2.14972	158.212	2.78219e-36	5.43222e-34
ENSMUSG00000007207	20907	Stx1a	syntaxin 1A (brain) [Source:MGI Symbol;Acc:MGI:109355]	2.57587	8.08771	155.707	9.80972e-36	1.88911e-33
ENSMUSG00000045777	320802	Ifitm10	interferon induced transmembrane protein 10 [Source:MGI Symbol;Acc:MGI:2444776]	-2.01389	4.09945	154.058	2.2489e-35	4.27231e-33
ENSMUSG00000017491	218772	Rarb	retinoic acid receptor, beta [Source:MGI Symbol;Acc:MGI:97857]	-3.53678	4.78641	153.992	2.3256e-35	4.35911e-33
ENSMUSG00000057719	269016	Sh3rf2	SH3 domain containing ring finger 2 [Source:MGI Symbol;Acc:MGI:2444628]	-5.23101	2.46589	153.423	3.09641e-35	5.72755e-33
ENSMUSG00000049796	12918	Crh	corticotropin releasing hormone [Source:MGI Symbol;Acc:MGI:88496]	-4.67767	3.38926	151.981	6.39614e-35	1.16775e-32
ENSMUSG00000061762	21333	Tac1	tachykinin 1 [Source:MGI Symbol;Acc:MGI:98474]	-4.35327	7.28036	151.475	8.25344e-35	1.48752e-32
ENSMUSG00000011148	11565	Adssl1	adenylosuccinate synthetase like 1 [Source:MGI Symbol;Acc:MGI:87947]	-2.28528	3.8451	151.176	9.5939e-35	1.70723e-32
ENSMUSG00000027401	21818	Tgm3	transglutaminase 3, E polypeptide [Source:MGI Symbol;Acc:MGI:98732]	3.76338	1.60238	150.967	1.06554e-34	1.87242e-32
ENSMUSG00000021508	57266	Cxcl14	chemokine (C-X-C motif) ligand 14 [Source:MGI Symbol;Acc:MGI:1888514]	-3.60622	6.25177	150.469	1.36902e-34	2.37602e-32
ENSMUSG00000030222	232441	Rerg	RAS-like, estrogen-regulated, growth-inhibitor [Source:MGI Symbol;Acc:MGI:2665139]	-3.38392	3.2817	149.63	2.08871e-34	3.58086e-32
ENSMUSG00000051910	20679	Sox6	SRY (sex determining region Y)-box 6 [Source:MGI Symbol;Acc:MGI:98368]	-3.98557	4.80972	149.33	2.42832e-34	4.11293e-32
ENSMUSG00000022747	54613	St3gal6	ST3 beta-galactoside alpha-2,3-sialyltransferase 6 [Source:MGI Symbol;Acc:MGI:1888707]	-2.86485	3.65425	148.816	3.14614e-34	5.26529e-32
ENSMUSG00000015843	20183	Rxrg	retinoid X receptor gamma [Source:MGI Symbol;Acc:MGI:98216]	-3.46659	4.58688	148.557	3.58432e-34	5.92804e-32
ENSMUSG00000032322	19200	Pstpip1	proline-serine-threonine phosphatase-interacting protein 1 [Source:MGI Symbol;Acc:MGI:1321396]	3.43343	1.63381	147.024	7.75464e-34	1.26761e-31
ENSMUSG00000028555	230603	Ttc39a	tetratricopeptide repeat domain 39A [Source:MGI Symbol;Acc:MGI:2444350]	-3.45514	1.3944	146.646	9.37659e-34	1.51513e-31
ENSMUSG00000001988	18142	Npas1	neuronal PAS domain protein 1 [Source:MGI Symbol;Acc:MGI:109205]	-4.17214	2.02545	146.539	9.89536e-34	1.58078e-31
ENSMUSG00000039601	53901	Rcan2	regulator of calcineurin 2 [Source:MGI Symbol;Acc:MGI:1858219]	-2.21053	6.83916	145.338	1.81201e-33	2.86216e-31
ENSMUSG00000050447	320343	Lypd6	LY6/PLAUR domain containing 6 [Source:MGI Symbol;Acc:MGI:2443848]	-2.64737	5.46325	144.053	3.45911e-33	5.40313e-31
ENSMUSG00000039405	76453	Prss23	protease, serine 23 [Source:MGI Symbol;Acc:MGI:1923703]	-3.15545	4.45623	143.622	4.29802e-33	6.63973e-31
ENSMUSG00000004366	20604	Sst	somatostatin [Source:MGI Symbol;Acc:MGI:98326]	-4.23318	9.48359	142.924	6.10814e-33	9.33351e-31
ENSMUSG00000040606	71529	Kazn	kazrin, periplakin interacting protein [Source:MGI Symbol;Acc:MGI:1918779]	-2.13711	5.82605	142.461	7.71164e-33	1.1657e-30
ENSMUSG00000039706	16826	Ldb2	LIM domain binding 2 [Source:MGI Symbol;Acc:MGI:894670]	2.10116	6.04105	141.666	1.15063e-32	1.72081e-30
ENSMUSG00000061718	19049	Ppp1r1b	protein phosphatase 1, regulatory (inhibitor) subunit 1B [Source:MGI Symbol;Acc:MGI:94860]	-3.97317	7.86381	141.253	1.41631e-32	2.09584e-30
ENSMUSG00000043822	66548	Adamtsl5	ADAMTS-like 5 [Source:MGI Symbol;Acc:MGI:1913798]	-4.92531	1.22632	141.145	1.49598e-32	2.19068e-30
ENSMUSG00000055044	54132	Pdlim1	PDZ and LIM domain 1 (elfin) [Source:MGI Symbol;Acc:MGI:1860611]	3.88786	3.1607	140.941	1.65729e-32	2.40187e-30
ENSMUSG00000032673	67939	Prorsd1	prolyl-tRNA synthetase domain containing 1 [Source:MGI Symbol;Acc:MGI:1915189]	-2.68062	2.45848	140.184	2.42659e-32	3.48092e-30
ENSMUSG00000027583	72147	Zbtb46	zinc finger and BTB domain containing 46 [Source:MGI Symbol;Acc:MGI:1919397]	2.21568	3.37099	139.72	3.06443e-32	4.3515e-30
ENSMUSG00000021743	54713	Fezf2	Fez family zinc finger 2 [Source:MGI Symbol;Acc:MGI:1859823]	4.09418	5.11983	138.742	5.01483e-32	7.04985e-30
ENSMUSG00000023484	19132	Prph	peripherin [Source:MGI Symbol;Acc:MGI:97774]	3.60108	1.40143	137.931	7.5448e-32	1.05015e-29
ENSMUSG00000046546	224093	Fam43a	family with sequence similarity 43, member A [Source:MGI Symbol;Acc:MGI:2676309]	-3.86828	2.00637	137.65	8.69193e-32	1.19795e-29
ENSMUSG00000063661	223915	Krt73	keratin 73 [Source:MGI Symbol;Acc:MGI:3607712]	-4.21497	2.00289	137.431	9.70355e-32	1.32439e-29
ENSMUSG00000031837	117148	Necab2	N-terminal EF-hand calcium binding protein 2 [Source:MGI Symbol;Acc:MGI:2152211]	-2.36685	5.48027	137.193	1.09419e-31	1.47905e-29
ENSMUSG00000010066	56808	Cacna2d2	calcium channel, voltage-dependent, alpha 2/delta subunit 2 [Source:MGI Symbol;Acc:MGI:1929813]	-2.62784	4.32986	136.338	1.68317e-31	2.25352e-29
ENSMUSG00000096014	20664	Sox1	SRY (sex determining region Y)-box 1 [Source:MGI Symbol;Acc:MGI:98357]	-4.3937	2.95574	135.503	2.56282e-31	3.39888e-29
ENSMUSG00000010461	14051	Eya4	EYA transcriptional coactivator and phosphatase 4 [Source:MGI Symbol;Acc:MGI:1337104]	-3.78782	1.45354	134.418	4.42541e-31	5.81425e-29
ENSMUSG00000033788	26903	Dysf	dysferlin [Source:MGI Symbol;Acc:MGI:1349385]	2.5063	2.52384	133.965	5.5596e-31	7.23675e-29
ENSMUSG00000001313	11858	Rnd2	Rho family GTPase 2 [Source:MGI Symbol;Acc:MGI:1338755]	-3.4404	6.28478	133.291	7.80731e-31	1.00693e-28
ENSMUSG00000030917	233806	Tmem159	transmembrane protein 159 [Source:MGI Symbol;Acc:MGI:1925752]	2.2862	4.68469	133.179	8.25977e-31	1.0556e-28
ENSMUSG00000045932	15958	Ifit2	interferon-induced protein with tetratricopeptide repeats 2 [Source:MGI Symbol;Acc:MGI:99449]	-3.01214	3.5616	133.011	8.99204e-31	1.13883e-28
ENSMUSG00000032946	19395	Rasgrp2	RAS, guanyl releasing protein 2 [Source:MGI Symbol;Acc:MGI:1333849]	-2.26803	3.76625	132.105	1.41914e-30	1.78127e-28
ENSMUSG00000085971	NA	Gm15411	predicted gene 15411 [Source:MGI Symbol;Acc:MGI:3705213]	3.6555	0.0821389	131.391	2.03355e-30	2.52988e-28
ENSMUSG00000038068	218215	Rnf144b	ring finger protein 144B [Source:MGI Symbol;Acc:MGI:2384986]	-2.49366	3.71621	131.093	2.36243e-30	2.91326e-28
ENSMUSG00000030790	11535	Adm	adrenomedullin [Source:MGI Symbol;Acc:MGI:108058]	-4.40053	1.19966	130.525	3.14482e-30	3.84434e-28
ENSMUSG00000057315	231532	Arhgap24	Rho GTPase activating protein 24 [Source:MGI Symbol;Acc:MGI:1922647]	-2.54585	2.68289	130.213	3.68003e-30	4.45982e-28
ENSMUSG00000059493	195727	Nhs	NHS actin remodeling regulator [Source:MGI Symbol;Acc:MGI:2684894]	-2.962	2.38888	129.696	4.77674e-30	5.73944e-28
ENSMUSG00000033965	20502	Slc16a2	solute carrier family 16 (monocarboxylic acid transporters), member 2 [Source:MGI Symbol;Acc:MGI:1203732]	2.00007	6.76754	129.142	6.31251e-30	7.52044e-28
ENSMUSG00000032265	212943	Fam46a	family with sequence similarity 46, member A [Source:MGI Symbol;Acc:MGI:2670964]	-3.39195	3.35643	128.465	8.87981e-30	1.04901e-27
ENSMUSG00000032714	71709	Syde1	synapse defective 1, Rho GTPase, homolog 1 (C. elegans) [Source:MGI Symbol;Acc:MGI:1918959]	-4.10002	2.23539	128.243	9.93246e-30	1.16359e-27
ENSMUSG00000015653	74051	Steap2	six transmembrane epithelial antigen of prostate 2 [Source:MGI Symbol;Acc:MGI:1921301]	-2.91849	4.16902	127.624	1.35667e-29	1.5762e-27
ENSMUSG00000039384	63953	Dusp10	dual specificity phosphatase 10 [Source:MGI Symbol;Acc:MGI:1927070]	-4.15237	3.61247	127.345	1.5614e-29	1.7992e-27
ENSMUSG00000023391	13392	Dlx2	distal-less homeobox 2 [Source:MGI Symbol;Acc:MGI:94902]	-4.7066	1.33565	127.31	1.58878e-29	1.81586e-27
ENSMUSG00000062209	13869	Erbb4	erb-b2 receptor tyrosine kinase 4 [Source:MGI Symbol;Acc:MGI:104771]	-3.57437	5.69058	127.26	1.62952e-29	1.8474e-27
ENSMUSG00000024992	110855	Pde6c	phosphodiesterase 6C, cGMP specific, cone, alpha prime [Source:MGI Symbol;Acc:MGI:105956]	4.19546	1.47099	126.977	1.87895e-29	2.11314e-27
ENSMUSG00000020053	16000	Igf1	insulin-like growth factor 1 [Source:MGI Symbol;Acc:MGI:96432]	-3.41302	4.74644	126.958	1.89775e-29	2.11735e-27
ENSMUSG00000087694	NA	A530058N18Rik	RIKEN cDNA A530058N18 gene [Source:MGI Symbol;Acc:MGI:2444858]	-3.86791	2.76917	126.472	2.42377e-29	2.68295e-27
ENSMUSG00000032698	16909	Lmo2	LIM domain only 2 [Source:MGI Symbol;Acc:MGI:102811]	-2.64336	4.30589	126.225	2.74479e-29	3.01455e-27
ENSMUSG00000060735	239336	Rxfp3	relaxin family peptide receptor 3 [Source:MGI Symbol;Acc:MGI:2441827]	-5.20783	1.66583	125.975	3.11316e-29	3.39263e-27
ENSMUSG00000024957	16528	Kcnk4	potassium channel, subfamily K, member 4 [Source:MGI Symbol;Acc:MGI:1298234]	2.72343	2.51422	125.931	3.18365e-29	3.44275e-27
ENSMUSG00000033007	241118	Asic4	acid-sensing (proton-gated) ion channel family member 4 [Source:MGI Symbol;Acc:MGI:2652846]	-3.5017	1.76248	125.834	3.34243e-29	3.58686e-27
ENSMUSG00000038011	56087	Dnah10	dynein, axonemal, heavy chain 10 [Source:MGI Symbol;Acc:MGI:1860299]	3.36871	1.20713	125.8	3.40094e-29	3.62201e-27
ENSMUSG00000030847	29810	Bag3	BCL2-associated athanogene 3 [Source:MGI Symbol;Acc:MGI:1352493]	-3.26519	2.70423	124.528	6.45586e-29	6.8238e-27
ENSMUSG00000001334	384061	Fndc5	fibronectin type III domain containing 5 [Source:MGI Symbol;Acc:MGI:1917614]	-1.98165	6.75861	123.72	9.70322e-29	1.01797e-26
ENSMUSG00000037708	381350	Spag6	sperm associated antigen 6 [Source:MGI Symbol;Acc:MGI:3040687]	4.51203	0.413783	122.716	1.60923e-28	1.67574e-26
ENSMUSG00000020121	117600	Srgap1	SLIT-ROBO Rho GTPase activating protein 1 [Source:MGI Symbol;Acc:MGI:2152936]	-2.30765	3.90493	122.057	2.24329e-28	2.31884e-26
ENSMUSG00000021478	13488	Drd1	dopamine receptor D1 [Source:MGI Symbol;Acc:MGI:99578]	-3.08985	5.45468	122.006	2.30163e-28	2.36178e-26
ENSMUSG00000020080	216019	Hkdc1	hexokinase domain containing 1 [Source:MGI Symbol;Acc:MGI:2384910]	3.20372	3.13474	121.859	2.47893e-28	2.52527e-26
ENSMUSG00000061132	17060	Blnk	B cell linker [Source:MGI Symbol;Acc:MGI:96878]	2.87042	3.42074	121.26	3.35245e-28	3.39056e-26
ENSMUSG00000037279	107586	Ovol2	ovo like zinc finger 2 [Source:MGI Symbol;Acc:MGI:1338039]	3.23009	2.56322	120.987	3.84636e-28	3.8623e-26
ENSMUSG00000052551	94191	Adarb2	adenosine deaminase, RNA-specific, B2 [Source:MGI Symbol;Acc:MGI:2151118]	-3.4839	3.96968	120.962	3.89443e-28	3.88283e-26
ENSMUSG00000036902	74513	Neto2	neuropilin (NRP) and tolloid (TLL)-like 2 [Source:MGI Symbol;Acc:MGI:1921763]	-2.20803	6.56453	120.645	4.57011e-28	4.52441e-26
ENSMUSG00000059187	320265	Fam19a1	family with sequence similarity 19, member A1 [Source:MGI Symbol;Acc:MGI:2443695]	3.57029	6.76557	120.593	4.69167e-28	4.61228e-26
ENSMUSG00000100303	NA	2600014E21Rik	RIKEN cDNA 2600014E21 gene [Source:MGI Symbol;Acc:MGI:1919384]	2.99065	1.99519	119.849	6.82732e-28	6.66518e-26
ENSMUSG00000024256	11516	Adcyap1	adenylate cyclase activating polypeptide 1 [Source:MGI Symbol;Acc:MGI:105094]	4.26471	4.97835	119.322	8.90465e-28	8.63321e-26
ENSMUSG00000027820	17380	Mme	membrane metallo endopeptidase [Source:MGI Symbol;Acc:MGI:97004]	-4.22179	2.43283	118.76	1.18193e-27	1.13805e-25
ENSMUSG00000036611	67484	Eepd1	endonuclease/exonuclease/phosphatase family domain containing 1 [Source:MGI Symbol;Acc:MGI:1914734]	-1.88672	4.182	118.637	1.25786e-27	1.20293e-25
ENSMUSG00000091898	21924	Tnnc1	troponin C, cardiac/slow skeletal [Source:MGI Symbol;Acc:MGI:98779]	4.08524	5.29041	118.445	1.3851e-27	1.31566e-25
ENSMUSG00000031932	14608	Gpr83	G protein-coupled receptor 83 [Source:MGI Symbol;Acc:MGI:95712]	-3.01088	5.98757	117.774	1.94327e-27	1.82275e-25
ENSMUSG00000020218	24117	Wif1	Wnt inhibitory factor 1 [Source:MGI Symbol;Acc:MGI:1344332]	-5.03556	1.17075	117.772	1.94489e-27	1.82275e-25
ENSMUSG00000020205	21664	Phlda1	pleckstrin homology like domain, family A, member 1 [Source:MGI Symbol;Acc:MGI:1096880]	-2.47841	4.06803	117.536	2.19091e-27	2.03972e-25
ENSMUSG00000000552	29813	Zfp385a	zinc finger protein 385A [Source:MGI Symbol;Acc:MGI:1352495]	-2.32027	2.84675	116.943	2.95444e-27	2.73247e-25
ENSMUSG00000035910	195208	Dcdc2a	doublecortin domain containing 2a [Source:MGI Symbol;Acc:MGI:2652818]	2.21812	3.03215	116.673	3.38581e-27	3.11096e-25
ENSMUSG00000003411	69908	Rab3b	RAB3B, member RAS oncogene family [Source:MGI Symbol;Acc:MGI:1917158]	-2.50708	7.71185	116.642	3.4394e-27	3.13968e-25
ENSMUSG00000031506	320139	Ptpn7	protein tyrosine phosphatase, non-receptor type 7 [Source:MGI Symbol;Acc:MGI:2156893]	-6.51151	-0.125033	116.372	3.94088e-27	3.57425e-25
ENSMUSG00000047935	NA	Gm5607	predicted gene 5607 [Source:MGI Symbol;Acc:MGI:3645522]	-3.47319	2.42314	115.942	4.89495e-27	4.4111e-25
ENSMUSG00000004341	75512	Gpx6	glutathione peroxidase 6 [Source:MGI Symbol;Acc:MGI:1922762]	-6.45938	0.427384	115.866	5.08455e-27	4.55278e-25
ENSMUSG00000027777	30953	Schip1	schwannomin interacting protein 1 [Source:MGI Symbol;Acc:MGI:1353557]	2.03936	9.39076	115.537	6.00269e-27	5.34087e-25
ENSMUSG00000020814	67622	Mxra7	matrix-remodelling associated 7 [Source:MGI Symbol;Acc:MGI:1914872]	-2.74219	2.68017	115.142	7.3251e-27	6.47649e-25
ENSMUSG00000020810	114886	Cygb	cytoglobin [Source:MGI Symbol;Acc:MGI:2149481]	-2.2164	4.72974	115.105	7.46362e-27	6.55773e-25
ENSMUSG00000022468	19011	Endou	endonuclease, polyU-specific [Source:MGI Symbol;Acc:MGI:97746]	3.62345	2.67019	114.722	9.05243e-27	7.90429e-25
ENSMUSG00000000983	14038	Wfdc18	WAP four-disulfide core domain 18 [Source:MGI Symbol;Acc:MGI:107506]	3.53266	3.77423	114.671	9.28994e-27	8.0616e-25
ENSMUSG00000032291	12903	Crabp1	cellular retinoic acid binding protein I [Source:MGI Symbol;Acc:MGI:88490]	-5.68703	2.3537	114.397	1.06654e-26	9.19839e-25
ENSMUSG00000005917	18423	Otx1	orthodenticle homeobox 1 [Source:MGI Symbol;Acc:MGI:97450]	2.61508	1.99641	114.382	1.0748e-26	9.21315e-25
ENSMUSG00000021215	56349	Net1	neuroepithelial cell transforming gene 1 [Source:MGI Symbol;Acc:MGI:1927138]	2.32134	3.71455	113.895	1.37379e-26	1.17047e-24
ENSMUSG00000020651	23985	Slc26a4	solute carrier family 26, member 4 [Source:MGI Symbol;Acc:MGI:1346029]	2.72058	2.24027	113.771	1.46258e-26	1.23861e-24
ENSMUSG00000031543	11733	Ank1	ankyrin 1, erythroid [Source:MGI Symbol;Acc:MGI:88024]	-2.67468	2.53908	113.494	1.68228e-26	1.41613e-24
ENSMUSG00000048562	320145	Sp8	trans-acting transcription factor 8 [Source:MGI Symbol;Acc:MGI:2443471]	-4.51309	3.62496	112.096	3.40395e-26	2.84838e-24
ENSMUSG00000027674	58869	Pex5l	peroxisomal biogenesis factor 5-like [Source:MGI Symbol;Acc:MGI:1916672]	2.1387	5.74371	111.533	4.52241e-26	3.76189e-24
ENSMUSG00000064065	320495	Ipcef1	interaction protein for cytohesin exchange factors 1 [Source:MGI Symbol;Acc:MGI:2444159]	1.83305	6.05873	111.501	4.5951e-26	3.79302e-24
ENSMUSG00000028011	56720	Tdo2	tryptophan 2,3-dioxygenase [Source:MGI Symbol;Acc:MGI:1928486]	4.3615	2.28787	111.493	4.61379e-26	3.79302e-24
ENSMUSG00000022840	224129	Adcy5	adenylate cyclase 5 [Source:MGI Symbol;Acc:MGI:99673]	-2.04394	7.75079	111.474	4.65991e-26	3.80866e-24
ENSMUSG00000053965	242202	Pde5a	phosphodiesterase 5A, cGMP-specific [Source:MGI Symbol;Acc:MGI:2651499]	-3.66782	2.79166	111.264	5.17869e-26	4.20821e-24
ENSMUSG00000005672	16590	Kit	KIT proto-oncogene receptor tyrosine kinase [Source:MGI Symbol;Acc:MGI:96677]	-2.61196	5.85693	111.233	5.26059e-26	4.2502e-24
ENSMUSG00000020905	216835	Usp43	ubiquitin specific peptidase 43 [Source:MGI Symbol;Acc:MGI:2444541]	3.14531	1.82577	111.046	5.7821e-26	4.63516e-24
ENSMUSG00000030844	67865	Rgs10	regulator of G-protein signalling 10 [Source:MGI Symbol;Acc:MGI:1915115]	-2.49165	5.77571	111.039	5.80302e-26	4.63516e-24
ENSMUSG00000022687	117606	Boc	biregional cell adhesion molecule-related/down-regulated by oncogenes (Cdon) binding protein [Source:MGI Symbol;Acc:MGI:2151153]	3.41601	3.50956	111.015	5.87226e-26	4.66397e-24
ENSMUSG00000030098	243547	Grip2	glutamate receptor interacting protein 2 [Source:MGI Symbol;Acc:MGI:2681173]	-1.87328	3.52066	111.003	5.90909e-26	4.66685e-24
ENSMUSG00000026452	20980	Syt2	synaptotagmin II [Source:MGI Symbol;Acc:MGI:99666]	-2.54999	5.38797	110.717	6.82438e-26	5.35961e-24
ENSMUSG00000087057	NA	Gm11730	predicted gene 11730 [Source:MGI Symbol;Acc:MGI:3650941]	4.30735	0.844749	110.652	7.05284e-26	5.50827e-24
ENSMUSG00000030043	21336	Tacr1	tachykinin receptor 1 [Source:MGI Symbol;Acc:MGI:98475]	-3.1318	2.64462	110.627	7.14187e-26	5.54699e-24
ENSMUSG00000031380	14205	Vegfd	vascular endothelial growth factor D [Source:MGI Symbol;Acc:MGI:108037]	4.55589	2.31434	110.348	8.22023e-26	6.34945e-24
ENSMUSG00000037474	76843	Dtl	denticleless E3 ubiquitin protein ligase [Source:MGI Symbol;Acc:MGI:1924093]	3.34167	3.62673	110.147	9.10064e-26	6.99108e-24
ENSMUSG00000029618	18261	Ocm	oncomodulin [Source:MGI Symbol;Acc:MGI:97401]	3.54245	1.09087	110.103	9.30103e-26	7.10619e-24
ENSMUSG00000024747	26358	Aldh1a7	aldehyde dehydrogenase family 1, subfamily A7 [Source:MGI Symbol;Acc:MGI:1347050]	3.49286	1.70161	109.796	1.08622e-25	8.25407e-24
ENSMUSG00000026347	72160	Tmem163	transmembrane protein 163 [Source:MGI Symbol;Acc:MGI:1919410]	2.60289	5.53311	109.373	1.34427e-25	1.01601e-23
ENSMUSG00000029094	70292	Afap1	actin filament associated protein 1 [Source:MGI Symbol;Acc:MGI:1917542]	-2.61429	5.52688	108.339	2.26505e-25	1.70279e-23
ENSMUSG00000026730	19212	Pter	phosphotriesterase related [Source:MGI Symbol;Acc:MGI:107372]	3.24424	6.84442	108.323	2.28402e-25	1.70791e-23
ENSMUSG00000026514	72978	Cnih3	cornichon family AMPA receptor auxiliary protein 3 [Source:MGI Symbol;Acc:MGI:1920228]	1.83602	6.71575	108.292	2.32005e-25	1.72568e-23
ENSMUSG00000031636	53318	Pdlim3	PDZ and LIM domain 3 [Source:MGI Symbol;Acc:MGI:1859274]	-4.08916	1.29651	107.762	3.03014e-25	2.24198e-23
ENSMUSG00000005716	19293	Pvalb	parvalbumin [Source:MGI Symbol;Acc:MGI:97821]	-4.82067	8.2079	107.489	3.47902e-25	2.56063e-23
ENSMUSG00000042515	245631	Mum1l1	melanoma associated antigen (mutated) 1-like 1 [Source:MGI Symbol;Acc:MGI:2445062]	-2.4358	1.72423	107.295	3.83591e-25	2.80861e-23
ENSMUSG00000036040	77794	Adamtsl2	ADAMTS-like 2 [Source:MGI Symbol;Acc:MGI:1925044]	2.07928	4.38366	107.218	3.98759e-25	2.90454e-23
ENSMUSG00000022860	246048	Chodl	chondrolectin [Source:MGI Symbol;Acc:MGI:2179069]	-4.26891	1.3206	106.836	4.83582e-25	3.50422e-23
ENSMUSG00000096883	435145	Shisa8	shisa family member 8 [Source:MGI Symbol;Acc:MGI:2146080]	-3.5529	0.516995	106.686	5.21525e-25	3.75979e-23
ENSMUSG00000043673	238076	Kcns3	potassium voltage-gated channel, delayed-rectifier, subfamily S, member 3 [Source:MGI Symbol;Acc:MGI:1098804]	-3.24843	3.91735	106.592	5.46807e-25	3.92195e-23
ENSMUSG00000067879	76982	3110035E14Rik	RIKEN cDNA 3110035E14 gene [Source:MGI Symbol;Acc:MGI:1924232]	2.75491	7.81346	106.231	6.5623e-25	4.68288e-23
ENSMUSG00000020363	14584	Gfpt2	glutamine fructose-6-phosphate transaminase 2 [Source:MGI Symbol;Acc:MGI:1338883]	-2.8679	3.42321	106.148	6.84455e-25	4.85963e-23
ENSMUSG00000027400	18610	Pdyn	prodynorphin [Source:MGI Symbol;Acc:MGI:97535]	-2.64844	6.00268	105.87	7.87283e-25	5.56162e-23
ENSMUSG00000041674	NA	BC006965	cDNA sequence BC006965 [Source:MGI Symbol;Acc:MGI:2384955]	2.73544	2.89363	105.753	8.35076e-25	5.86975e-23
ENSMUSG00000061086	17896	Myl4	myosin, light polypeptide 4 [Source:MGI Symbol;Acc:MGI:97267]	3.76588	5.48518	105.714	8.52004e-25	5.93525e-23
ENSMUSG00000023868	23984	Pde10a	phosphodiesterase 10A [Source:MGI Symbol;Acc:MGI:1345143]	-3.05014	6.5837	105.712	8.52839e-25	5.93525e-23
ENSMUSG00000025812	93742	Pard3	par-3 family cell polarity regulator [Source:MGI Symbol;Acc:MGI:2135608]	-1.81539	4.18779	105.446	9.75311e-25	6.75415e-23
ENSMUSG00000090291	278795	Lrrc10b	leucine rich repeat containing 10B [Source:MGI Symbol;Acc:MGI:2685551]	-2.5543	3.8375	105.377	1.0099e-24	6.95941e-23
ENSMUSG00000029178	16599	Klf3	Kruppel-like factor 3 (basic) [Source:MGI Symbol;Acc:MGI:1342773]	-2.12964	4.01094	104.967	1.24168e-24	8.51491e-23
ENSMUSG00000015112	50799	Slc25a13	solute carrier family 25 (mitochondrial carrier, adenine nucleotide translocator), member 13 [Source:MGI Symbol;Acc:MGI:1354721]	-2.76656	1.03786	104.794	1.35528e-24	9.24881e-23
ENSMUSG00000036856	22417	Wnt4	wingless-type MMTV integration site family, member 4 [Source:MGI Symbol;Acc:MGI:98957]	2.77017	3.80655	104.44	1.62027e-24	1.10037e-22
ENSMUSG00000074345	244882	Tnfaip8l3	tumor necrosis factor, alpha-induced protein 8-like 3 [Source:MGI Symbol;Acc:MGI:2685363]	-3.21058	2.32632	103.574	2.50909e-24	1.69581e-22
ENSMUSG00000029560	231834	Snx8	sorting nexin 8 [Source:MGI Symbol;Acc:MGI:2443816]	-3.33318	2.79729	103.463	2.65249e-24	1.78415e-22
ENSMUSG00000085007	NA	Gm11549	predicted gene 11549 [Source:MGI Symbol;Acc:MGI:3650339]	2.66784	5.75237	103.339	2.82405e-24	1.8905e-22
ENSMUSG00000001053	212706	N4bp3	NEDD4 binding protein 3 [Source:MGI Symbol;Acc:MGI:2442218]	-2.98121	0.936291	103.293	2.89114e-24	1.92624e-22
ENSMUSG00000033966	381113	Cdkl4	cyclin-dependent kinase-like 4 [Source:MGI Symbol;Acc:MGI:3587025]	2.43464	4.43546	103.188	3.04805e-24	2.0212e-22
ENSMUSG00000028337	107684	Coro2a	coronin, actin binding protein 2A [Source:MGI Symbol;Acc:MGI:1345966]	1.51289	4.27054	103.082	3.21492e-24	2.12184e-22
ENSMUSG00000093460	NA	Six3os1	SIX homeobox 3, opposite strand 1 [Source:MGI Symbol;Acc:MGI:1925118]	-4.35815	0.500425	103.014	3.32766e-24	2.18599e-22
ENSMUSG00000015568	16956	Lpl	lipoprotein lipase [Source:MGI Symbol;Acc:MGI:96820]	-2.7885	5.43437	102.974	3.39539e-24	2.22011e-22
ENSMUSG00000070366	381925	Plpp4	phospholipid phosphatase 4 [Source:MGI Symbol;Acc:MGI:2685936]	-2.04187	2.56866	101.96	5.6662e-24	3.68775e-22
ENSMUSG00000030772	50781	Dkk3	dickkopf WNT signaling pathway inhibitor 3 [Source:MGI Symbol;Acc:MGI:1354952]	3.01697	8.06808	101.82	6.07916e-24	3.93829e-22
ENSMUSG00000032259	13489	Drd2	dopamine receptor D2 [Source:MGI Symbol;Acc:MGI:94924]	-4.56033	2.87813	101.643	6.6475e-24	4.28672e-22
ENSMUSG00000034773	217216	BC030867	cDNA sequence BC030867 [Source:MGI Symbol;Acc:MGI:2387601]	-3.11959	1.22047	101.164	8.46931e-24	5.4366e-22
ENSMUSG00000048087	11615	Gm4737	predicted gene 4737 [Source:MGI Symbol;Acc:MGI:3643647]	-4.3141	-0.660184	101.104	8.72622e-24	5.57606e-22
ENSMUSG00000060402	68947	Chst8	carbohydrate (N-acetylgalactosamine 4-0) sulfotransferase 8 [Source:MGI Symbol;Acc:MGI:1916197]	3.7519	3.00537	100.956	9.40678e-24	5.98374e-22
ENSMUSG00000070570	72961	Slc17a7	solute carrier family 17 (sodium-dependent inorganic phosphate cotransporter), member 7 [Source:MGI Symbol;Acc:MGI:1920211]	3.30268	9.06984	100.047	1.4882e-23	9.42391e-22
ENSMUSG00000023192	108068	Grm2	glutamate receptor, metabotropic 2 [Source:MGI Symbol;Acc:MGI:1351339]	3.03549	5.72303	99.9281	1.58032e-23	9.9624e-22
ENSMUSG00000070687	15552	Htr1d	5-hydroxytryptamine (serotonin) receptor 1D [Source:MGI Symbol;Acc:MGI:96276]	-3.83182	1.68826	99.7507	1.72844e-23	1.08475e-21
ENSMUSG00000029602	19415	Rasal1	RAS protein activator like 1 (GAP1 like) [Source:MGI Symbol;Acc:MGI:1330842]	2.48579	4.71151	99.6772	1.79376e-23	1.12074e-21
ENSMUSG00000026103	14660	Gls	glutaminase [Source:MGI Symbol;Acc:MGI:95752]	1.35445	7.94328	99.5792	1.88473e-23	1.17237e-21
ENSMUSG00000021613	12950	Hapln1	hyaluronan and proteoglycan link protein 1 [Source:MGI Symbol;Acc:MGI:1337006]	-3.79576	5.38908	99.5388	1.9236e-23	1.18897e-21
ENSMUSG00000029810	65963	Tmem176b	transmembrane protein 176B [Source:MGI Symbol;Acc:MGI:1916348]	-2.78832	6.22979	99.5339	1.92834e-23	1.18897e-21
ENSMUSG00000022665	67896	Ccdc80	coiled-coil domain containing 80 [Source:MGI Symbol;Acc:MGI:1915146]	2.538	4.54899	99.4001	2.06312e-23	1.26652e-21
ENSMUSG00000087022	NA	9130024F11Rik	RIKEN cDNA 9130024F11 gene [Source:MGI Symbol;Acc:MGI:1926150]	3.03156	4.2874	98.9798	2.55088e-23	1.55914e-21
ENSMUSG00000037892	73173	Pcdh18	protocadherin 18 [Source:MGI Symbol;Acc:MGI:1920423]	-2.81655	3.37258	98.6136	3.06902e-23	1.86772e-21
ENSMUSG00000022935	14805	Grik1	glutamate receptor, ionotropic, kainate 1 [Source:MGI Symbol;Acc:MGI:95814]	-2.75109	4.21867	98.3729	3.46569e-23	2.10003e-21
ENSMUSG00000030862	55987	Cpxm2	carboxypeptidase X 2 (M14 family) [Source:MGI Symbol;Acc:MGI:1926006]	2.81378	1.73562	98.3502	3.50559e-23	2.11509e-21
ENSMUSG00000032380	13143	Dapk2	death-associated protein kinase 2 [Source:MGI Symbol;Acc:MGI:1341297]	2.3179	2.07281	98.3309	3.53994e-23	2.12669e-21
ENSMUSG00000029101	71729	Rgs12	regulator of G-protein signaling 12 [Source:MGI Symbol;Acc:MGI:1918979]	-2.27356	5.07889	98.2452	3.69656e-23	2.21133e-21
ENSMUSG00000059713	53902	Rcan3	regulator of calcineurin 3 [Source:MGI Symbol;Acc:MGI:1858220]	-2.59444	5.06457	97.9941	4.19635e-23	2.49968e-21
ENSMUSG00000029563	114142	Foxp2	forkhead box P2 [Source:MGI Symbol;Acc:MGI:2148705]	-2.39612	4.7097	97.3823	5.71538e-23	3.39016e-21
ENSMUSG00000021534	69315	1700001L19Rik	RIKEN cDNA 1700001L19 gene [Source:MGI Symbol;Acc:MGI:1916565]	2.05994	4.05421	96.8909	7.32542e-23	4.32692e-21
ENSMUSG00000096606	100503386	Tpbgl	trophoblast glycoprotein-like [Source:MGI Symbol;Acc:MGI:3646425]	-3.29843	1.4485	96.8359	7.53179e-23	4.4302e-21
ENSMUSG00000085549	NA	1700047F07Rik	RIKEN cDNA 1700047F07 gene [Source:MGI Symbol;Acc:MGI:1920570]	3.07526	2.15166	96.6642	8.21421e-23	4.81147e-21
ENSMUSG00000025207	26456	Sema4g	sema domain, immunoglobulin domain (Ig), transmembrane domain (TM) and short cytoplasmic domain, (semaphorin) 4G [Source:MGI Symbol;Acc:MGI:1347047]	-1.71109	4.32438	96.4767	9.02983e-23	5.26728e-21
ENSMUSG00000046480	399548	Scn4b	sodium channel, type IV, beta [Source:MGI Symbol;Acc:MGI:2687406]	-2.65244	5.84477	96.3166	9.79073e-23	5.68752e-21
ENSMUSG00000047250	19224	Ptgs1	prostaglandin-endoperoxide synthase 1 [Source:MGI Symbol;Acc:MGI:97797]	-2.75059	4.71021	96.1296	1.07605e-22	6.22516e-21
ENSMUSG00000057280	18198	Musk	muscle, skeletal, receptor tyrosine kinase [Source:MGI Symbol;Acc:MGI:103581]	-4.41045	0.560612	95.663	1.36204e-22	7.84737e-21
ENSMUSG00000076498	NA	Trbc2	T cell receptor beta, constant 2 [Source:MGI Symbol;Acc:MGI:4835227]	2.546	4.21287	95.3457	1.59881e-22	9.17393e-21
ENSMUSG00000020096	65971	Tbata	thymus, brain and testes associated [Source:MGI Symbol;Acc:MGI:1923820]	2.34592	2.29564	95.1282	1.78445e-22	1.01975e-20
ENSMUSG00000046997	211949	Spsb4	splA/ryanodine receptor domain and SOCS box containing 4 [Source:MGI Symbol;Acc:MGI:2183445]	-3.46248	2.00363	94.531	2.41285e-22	1.37327e-20
ENSMUSG00000086596	382111	Susd5	sushi domain containing 5 [Source:MGI Symbol;Acc:MGI:2685972]	3.38404	3.5695	94.3833	2.59978e-22	1.4737e-20
ENSMUSG00000042258	16392	Isl1	ISL1 transcription factor, LIM/homeodomain [Source:MGI Symbol;Acc:MGI:101791]	-4.84331	1.92601	94.3366	2.66182e-22	1.5028e-20
ENSMUSG00000048138	226049	Dmrt2	doublesex and mab-3 related transcription factor 2 [Source:MGI Symbol;Acc:MGI:1330307]	-2.62309	0.514727	93.3168	4.45603e-22	2.50571e-20
ENSMUSG00000018470	16499	Kcnab3	potassium voltage-gated channel, shaker-related subfamily, beta member 3 [Source:MGI Symbol;Acc:MGI:1336208]	-1.50118	5.46228	93.2547	4.59797e-22	2.57523e-20
ENSMUSG00000050821	78408	Fam131a	family with sequence similarity 131, member A [Source:MGI Symbol;Acc:MGI:1925658]	1.97837	7.11263	93.2135	4.69479e-22	2.61902e-20
ENSMUSG00000002104	19400	Rapsn	receptor-associated protein of the synapse [Source:MGI Symbol;Acc:MGI:99422]	-2.7466	0.98509	93.0192	5.1789e-22	2.87766e-20
ENSMUSG00000024866	71670	Acy3	aspartoacylase (aminoacylase) 3 [Source:MGI Symbol;Acc:MGI:1918920]	3.07075	1.25864	92.9947	5.24334e-22	2.902e-20
ENSMUSG00000030905	12971	Crym	crystallin, mu [Source:MGI Symbol;Acc:MGI:102675]	2.32881	7.26106	92.8267	5.70805e-22	3.14682e-20
ENSMUSG00000049630	227580	C1ql3	C1q-like 3 [Source:MGI Symbol;Acc:MGI:2387350]	2.55022	5.9068	92.5637	6.51932e-22	3.58002e-20
ENSMUSG00000049265	16527	Kcnk3	potassium channel, subfamily K, member 3 [Source:MGI Symbol;Acc:MGI:1100509]	-1.89088	4.69146	92.3824	7.14471e-22	3.90819e-20
ENSMUSG00000023262	109652	Acy1	aminoacylase 1 [Source:MGI Symbol;Acc:MGI:87913]	-2.10121	3.36484	91.9188	9.03055e-22	4.9206e-20
ENSMUSG00000020000	59012	Moxd1	monooxygenase, DBH-like 1 [Source:MGI Symbol;Acc:MGI:1921582]	-3.36327	3.31981	91.802	9.57984e-22	5.19974e-20
ENSMUSG00000022421	73340	Nptxr	neuronal pentraxin receptor [Source:MGI Symbol;Acc:MGI:1920590]	2.16046	9.47247	91.4579	1.13994e-21	6.16355e-20
ENSMUSG00000027238	228564	Frmd5	FERM domain containing 5 [Source:MGI Symbol;Acc:MGI:2442557]	-1.55233	4.59175	91.3737	1.18946e-21	6.40668e-20
ENSMUSG00000035456	77630	Prdm8	PR domain containing 8 [Source:MGI Symbol;Acc:MGI:1924880]	2.52976	4.13962	91.3192	1.22267e-21	6.5604e-20
ENSMUSG00000034813	74053	Grip1	glutamate receptor interacting protein 1 [Source:MGI Symbol;Acc:MGI:1921303]	-1.70758	4.50858	91.0964	1.3684e-21	7.31442e-20
ENSMUSG00000000126	216795	Wnt9a	wingless-type MMTV integration site family, member 9A [Source:MGI Symbol;Acc:MGI:2446084]	2.45892	2.93309	91.0322	1.41354e-21	7.5137e-20
ENSMUSG00000021647	27220	Cartpt	CART prepropeptide [Source:MGI Symbol;Acc:MGI:1351330]	-2.64371	4.13521	91.0282	1.41637e-21	7.5137e-20
ENSMUSG00000048458	109050	Fam212b	family with sequence similarity 212, member B [Source:MGI Symbol;Acc:MGI:1923497]	1.40691	6.45951	90.9753	1.45474e-21	7.68827e-20
ENSMUSG00000036617	208618	Etl4	enhancer trap locus 4 [Source:MGI Symbol;Acc:MGI:95454]	-1.75744	6.35313	90.8465	1.55259e-21	8.17463e-20
ENSMUSG00000039518	386463	Cdsn	corneodesmosin [Source:MGI Symbol;Acc:MGI:3505689]	3.09754	0.809041	90.8097	1.58179e-21	8.29731e-20
ENSMUSG00000029304	20750	Spp1	secreted phosphoprotein 1 [Source:MGI Symbol;Acc:MGI:98389]	-3.11903	4.30903	90.4301	1.91629e-21	1.00146e-19
ENSMUSG00000053025	64176	Sv2b	synaptic vesicle glycoprotein 2 b [Source:MGI Symbol;Acc:MGI:1927338]	2.78623	8.90569	90.4141	1.93182e-21	1.00583e-19
ENSMUSG00000039114	68404	Nrn1	neuritin 1 [Source:MGI Symbol;Acc:MGI:1915654]	3.45028	7.96502	90.3639	1.98146e-21	1.02787e-19
ENSMUSG00000039252	246316	Lgi2	leucine-rich repeat LGI family, member 2 [Source:MGI Symbol;Acc:MGI:2180196]	-2.14888	5.08785	90.2506	2.09823e-21	1.08445e-19
ENSMUSG00000016194	15483	Hsd11b1	hydroxysteroid 11-beta dehydrogenase 1 [Source:MGI Symbol;Acc:MGI:103562]	2.87498	6.2861	90.2313	2.11878e-21	1.09106e-19
ENSMUSG00000020599	19739	Rgs9	regulator of G-protein signaling 9 [Source:MGI Symbol;Acc:MGI:1338824]	-3.59173	4.72305	90.143	2.21556e-21	1.13673e-19
ENSMUSG00000068551	68910	Zfp467	zinc finger protein 467 [Source:MGI Symbol;Acc:MGI:1916160]	-2.43123	3.30811	90.0135	2.36535e-21	1.20917e-19
ENSMUSG00000046922	140741	Gpr6	G protein-coupled receptor 6 [Source:MGI Symbol;Acc:MGI:2155249]	-3.05773	4.24856	89.9599	2.4304e-21	1.23792e-19
ENSMUSG00000053414	26559	Hunk	hormonally upregulated Neu-associated kinase [Source:MGI Symbol;Acc:MGI:1347352]	-1.60907	4.30935	89.854	2.56399e-21	1.30125e-19
ENSMUSG00000049001	68169	Ndnf	neuron-derived neurotrophic factor [Source:MGI Symbol;Acc:MGI:1915419]	-3.18325	3.28783	89.2563	3.46828e-21	1.75385e-19
ENSMUSG00000040016	19218	Ptger3	prostaglandin E receptor 3 (subtype EP3) [Source:MGI Symbol;Acc:MGI:97795]	3.57319	1.89971	89.2023	3.5644e-21	1.796e-19
ENSMUSG00000079022	69700	Col22a1	collagen, type XXII, alpha 1 [Source:MGI Symbol;Acc:MGI:1916950]	3.57667	1.26026	89.1746	3.61465e-21	1.81481e-19
ENSMUSG00000031698	213435	Mylk3	myosin light chain kinase 3 [Source:MGI Symbol;Acc:MGI:2443063]	3.72992	1.96708	88.676	4.6508e-21	2.32672e-19
ENSMUSG00000036907	226359	C1ql2	complement component 1, q subcomponent-like 2 [Source:MGI Symbol;Acc:MGI:3032521]	3.67375	1.73721	87.9646	6.66371e-21	3.32193e-19
ENSMUSG00000078137	383787	Ankrd63	ankyrin repeat domain 63 [Source:MGI Symbol;Acc:MGI:2686183]	-2.51199	4.26563	87.9178	6.82326e-21	3.38945e-19
ENSMUSG00000026765	71897	Lypd6b	LY6/PLAUR domain containing 6B [Source:MGI Symbol;Acc:MGI:1919147]	-1.67554	4.82073	87.8435	7.08451e-21	3.50683e-19
ENSMUSG00000034295	225288	Fhod3	formin homology 2 domain containing 3 [Source:MGI Symbol;Acc:MGI:1925847]	1.45192	5.46977	87.7095	7.58081e-21	3.73933e-19
ENSMUSG00000037419	71946	Endod1	endonuclease domain containing 1 [Source:MGI Symbol;Acc:MGI:1919196]	-1.31093	6.9926	87.6926	7.64615e-21	3.75838e-19
ENSMUSG00000042453	19699	Reln	reelin [Source:MGI Symbol;Acc:MGI:103022]	-2.23027	7.25715	87.4558	8.61838e-21	4.2215e-19
ENSMUSG00000030103	20893	Bhlhe40	basic helix-loop-helix family, member e40 [Source:MGI Symbol;Acc:MGI:1097714]	2.41589	6.54419	87.191	9.85287e-21	4.80943e-19
ENSMUSG00000034910	72135	Pygo1	pygopus 1 [Source:MGI Symbol;Acc:MGI:1919385]	-1.9639	4.8464	86.858	1.16599e-20	5.67178e-19
ENSMUSG00000026479	16782	Lamc2	laminin, gamma 2 [Source:MGI Symbol;Acc:MGI:99913]	2.1093	3.73158	86.838	1.17785e-20	5.70974e-19
ENSMUSG00000030792	50722	Dkkl1	dickkopf-like 1 [Source:MGI Symbol;Acc:MGI:1354963]	4.14566	3.54287	86.7293	1.24437e-20	6.01148e-19
ENSMUSG00000055639	13134	Dach1	dachshund 1 (Drosophila) [Source:MGI Symbol;Acc:MGI:1277991]	-2.83535	2.78729	86.7005	1.26262e-20	6.07874e-19
ENSMUSG00000000392	14089	Fap	fibroblast activation protein [Source:MGI Symbol;Acc:MGI:109608]	3.43372	1.69671	86.4375	1.44223e-20	6.91976e-19
ENSMUSG00000016763	64706	Scube1	signal peptide, CUB domain, EGF-like 1 [Source:MGI Symbol;Acc:MGI:1890616]	2.86101	6.04581	86.1779	1.64453e-20	7.86356e-19
ENSMUSG00000031119	14735	Gpc4	glypican 4 [Source:MGI Symbol;Acc:MGI:104902]	2.35397	4.8736	85.9251	1.86879e-20	8.90558e-19
ENSMUSG00000069132	18232	Nxph2	neurexophilin 2 [Source:MGI Symbol;Acc:MGI:107491]	-3.16589	2.54387	85.5352	2.27619e-20	1.08104e-18
ENSMUSG00000022206	18162	Npr3	natriuretic peptide receptor 3 [Source:MGI Symbol;Acc:MGI:97373]	2.49638	2.60331	85.4213	2.41104e-20	1.14123e-18
ENSMUSG00000016494	12490	Cd34	CD34 antigen [Source:MGI Symbol;Acc:MGI:88329]	2.57674	5.86765	85.2991	2.56479e-20	1.20993e-18
ENSMUSG00000062300	19294	Nectin2	nectin cell adhesion molecule 2 [Source:MGI Symbol;Acc:MGI:97822]	-2.48666	2.44281	85.2822	2.58677e-20	1.21622e-18
ENSMUSG00000046523	67516	Kctd4	potassium channel tetramerisation domain containing 4 [Source:MGI Symbol;Acc:MGI:1914766]	2.09922	4.77366	85.2436	2.63777e-20	1.23606e-18
ENSMUSG00000084946	NA	Dlx1as	distal-less homeobox 1, antisense [Source:MGI Symbol;Acc:MGI:1195983]	-3.9727	0.960703	84.9911	2.99706e-20	1.39975e-18
ENSMUSG00000037984	11922	Neurod6	neurogenic differentiation 6 [Source:MGI Symbol;Acc:MGI:106593]	3.49426	6.64177	84.736	3.40993e-20	1.58731e-18
ENSMUSG00000036699	72693	Zcchc12	zinc finger, CCHC domain containing 12 [Source:MGI Symbol;Acc:MGI:1919943]	-2.79665	6.16747	84.6668	3.53136e-20	1.63841e-18
ENSMUSG00000033453	235130	Adamts15	a disintegrin-like and metallopeptidase (reprolysin type) with thrombospondin type 1 motif, 15 [Source:MGI Symbol;Acc:MGI:2449569]	-3.20253	2.90945	84.6312	3.59539e-20	1.66263e-18
ENSMUSG00000050967	263764	Creg2	cellular repressor of E1A-stimulated genes 2 [Source:MGI Symbol;Acc:MGI:1928333]	1.49202	6.63774	84.431	3.97869e-20	1.83385e-18
ENSMUSG00000091636	320722	Akain1	A kinase (PRKA) anchor inhibitor 1 [Source:MGI Symbol;Acc:MGI:2444600]	-2.26942	2.77872	84.2586	4.34115e-20	1.99438e-18
ENSMUSG00000020061	109272	Mybpc1	myosin binding protein C, slow-type [Source:MGI Symbol;Acc:MGI:1336213]	-4.11782	2.98684	83.9473	5.08137e-20	2.32684e-18
ENSMUSG00000087301	NA	Gm13629	predicted gene 13629 [Source:MGI Symbol;Acc:MGI:3650683]	-2.33468	3.49888	83.902	5.19919e-20	2.37306e-18
ENSMUSG00000043668	244579	Tox3	TOX high mobility group box family member 3 [Source:MGI Symbol;Acc:MGI:3039593]	-1.51961	4.28815	83.8846	5.24528e-20	2.38635e-18
ENSMUSG00000030050	66283	Gkn1	gastrokine 1 [Source:MGI Symbol;Acc:MGI:1913533]	4.40742	0.112849	83.8379	5.37063e-20	2.43549e-18
ENSMUSG00000030170	22419	Wnt5b	wingless-type MMTV integration site family, member 5B [Source:MGI Symbol;Acc:MGI:98959]	-3.964	0.542668	83.7693	5.56017e-20	2.51334e-18
ENSMUSG00000085795	353310	Zfp703	zinc finger protein 703 [Source:MGI Symbol;Acc:MGI:2662729]	1.9334	3.51216	83.7172	5.70874e-20	2.57223e-18
ENSMUSG00000030889	233813	Vwa3a	von Willebrand factor A domain containing 3A [Source:MGI Symbol;Acc:MGI:3041229]	2.95101	2.28781	83.5969	6.06695e-20	2.72489e-18
ENSMUSG00000075296	621603	Aldh3b2	aldehyde dehydrogenase 3 family, member B2 [Source:MGI Symbol;Acc:MGI:2147613]	2.46806	3.37541	83.411	6.66514e-20	2.98403e-18
ENSMUSG00000034570	170835	Inpp5j	inositol polyphosphate 5-phosphatase J [Source:MGI Symbol;Acc:MGI:2158663]	-1.89937	2.80482	82.9672	8.34243e-20	3.72311e-18
ENSMUSG00000068417	667034	Pnp2	purine-nucleoside phosphorylase 2 [Source:MGI Symbol;Acc:MGI:3712328]	-4.41788	0.539437	82.4291	1.09531e-19	4.87274e-18
ENSMUSG00000035168	66860	Tanc1	tetratricopeptide repeat, ankyrin repeat and coiled-coil containing 1 [Source:MGI Symbol;Acc:MGI:1914110]	1.51743	4.25878	82.3623	1.13296e-19	5.02433e-18
ENSMUSG00000028111	13038	Ctsk	cathepsin K [Source:MGI Symbol;Acc:MGI:107823]	2.88459	4.21571	81.9605	1.38835e-19	6.13754e-18
ENSMUSG00000048215	NA	A630023P12Rik	RIKEN cDNA A630023P12 gene [Source:MGI Symbol;Acc:MGI:2445162]	3.28843	1.47679	81.6943	1.58854e-19	7.00053e-18
ENSMUSG00000097083	NA	D930019O06Rik	RIKEN cDNA D930019O06 [Source:MGI Symbol;Acc:MGI:3043219]	2.45609	1.83642	81.2335	2.00562e-19	8.81094e-18
ENSMUSG00000038255	18013	Neurod2	neurogenic differentiation 2 [Source:MGI Symbol;Acc:MGI:107755]	3.14678	4.48333	81.1926	2.04758e-19	8.96725e-18
ENSMUSG00000024059	78785	Clip4	CAP-GLY domain containing linker protein family, member 4 [Source:MGI Symbol;Acc:MGI:1919100]	-1.35554	5.60582	80.448	2.98449e-19	1.30298e-17
ENSMUSG00000044813	230126	Shb	src homology 2 domain-containing transforming protein B [Source:MGI Symbol;Acc:MGI:98294]	-2.53773	1.59123	80.2585	3.28502e-19	1.42975e-17
ENSMUSG00000038807	380711	Rap1gap2	RAP1 GTPase activating protein 2 [Source:MGI Symbol;Acc:MGI:3028623]	1.65842	7.71939	80.1272	3.51073e-19	1.52327e-17
ENSMUSG00000022489	18574	Pde1b	phosphodiesterase 1B, Ca2+-calmodulin dependent [Source:MGI Symbol;Acc:MGI:97523]	-1.96522	5.59757	79.6795	4.40351e-19	1.90476e-17
ENSMUSG00000031364	14829	Grpr	gastrin releasing peptide receptor [Source:MGI Symbol;Acc:MGI:95836]	-4.58508	1.62343	79.4812	4.86828e-19	2.09933e-17
ENSMUSG00000039081	218820	Zfp503	zinc finger protein 503 [Source:MGI Symbol;Acc:MGI:1353644]	-2.81104	0.488448	79.4093	5.0489e-19	2.17056e-17
ENSMUSG00000037221	68929	Mospd3	motile sperm domain containing 3 [Source:MGI Symbol;Acc:MGI:1916179]	-1.35422	4.15443	79.2974	5.34296e-19	2.28998e-17
ENSMUSG00000028559	100273	Osbpl9	oxysterol binding protein-like 9 [Source:MGI Symbol;Acc:MGI:1923784]	-1.26464	5.39796	79.152	5.75094e-19	2.45735e-17
ENSMUSG00000027765	18441	P2ry1	purinergic receptor P2Y, G-protein coupled 1 [Source:MGI Symbol;Acc:MGI:105049]	-3.72256	1.73948	79.0902	5.93368e-19	2.52775e-17
ENSMUSG00000043456	243937	Zfp536	zinc finger protein 536 [Source:MGI Symbol;Acc:MGI:1926102]	-2.62333	4.10065	78.9275	6.4433e-19	2.73655e-17
ENSMUSG00000060487	320825	Samd5	sterile alpha motif domain containing 5 [Source:MGI Symbol;Acc:MGI:2444815]	-2.32735	2.31116	78.5811	7.67802e-19	3.25113e-17
ENSMUSG00000035000	13482	Dpp4	dipeptidylpeptidase 4 [Source:MGI Symbol;Acc:MGI:94919]	3.33179	2.33068	78.3452	8.65173e-19	3.65243e-17
ENSMUSG00000052560	66871	Cpne8	copine VIII [Source:MGI Symbol;Acc:MGI:1914121]	1.27016	4.99849	78.1578	9.51295e-19	4.00398e-17
ENSMUSG00000023274	12504	Cd4	CD4 antigen [Source:MGI Symbol;Acc:MGI:88335]	-4.54712	3.94748	77.8986	1.08467e-18	4.55175e-17
ENSMUSG00000022773	106369	Ypel1	yippee-like 1 (Drosophila) [Source:MGI Symbol;Acc:MGI:1913303]	1.76786	4.38603	77.5158	1.31668e-18	5.50891e-17
ENSMUSG00000031654	12404	Cbln1	cerebellin 1 precursor protein [Source:MGI Symbol;Acc:MGI:88281]	3.24657	3.899	77.4711	1.34679e-18	5.61816e-17
ENSMUSG00000048967	67184	Yjefn3	YjeF N-terminal domain containing 3 [Source:MGI Symbol;Acc:MGI:2681845]	-2.57206	1.46345	77.4237	1.37951e-18	5.73763e-17
ENSMUSG00000058260	71907	Serpina9	serine (or cysteine) peptidase inhibitor, clade A (alpha-1 antiproteinase, antitrypsin), member 9 [Source:MGI Symbol;Acc:MGI:1919157]	-4.47185	2.28822	77.3911	1.40248e-18	5.81596e-17
ENSMUSG00000038677	268935	Scube3	signal peptide, CUB domain, EGF-like 3 [Source:MGI Symbol;Acc:MGI:3045253]	-3.04607	1.53901	77.0954	1.62892e-18	6.73511e-17
ENSMUSG00000063659	30928	Zbtb18	zinc finger and BTB domain containing 18 [Source:MGI Symbol;Acc:MGI:1353609]	1.73626	6.70934	77.0622	1.65658e-18	6.82939e-17
ENSMUSG00000039103	68810	Nexn	nexilin [Source:MGI Symbol;Acc:MGI:1916060]	-3.81203	4.21995	76.9806	1.72649e-18	7.09678e-17
ENSMUSG00000025776	83691	Crispld1	cysteine-rich secretory protein LCCL domain containing 1 [Source:MGI Symbol;Acc:MGI:1934666]	-2.76978	2.16965	76.8519	1.84273e-18	7.55252e-17
ENSMUSG00000020262	110532	Adarb1	adenosine deaminase, RNA-specific, B1 [Source:MGI Symbol;Acc:MGI:891999]	-1.25191	6.6751	76.7605	1.93e-18	7.88719e-17
ENSMUSG00000034171	14073	Faah	fatty acid amide hydrolase [Source:MGI Symbol;Acc:MGI:109609]	1.61807	7.29465	76.7068	1.98323e-18	8.08124e-17
ENSMUSG00000042489	269582	Clspn	claspin [Source:MGI Symbol;Acc:MGI:2445153]	-2.91386	1.19846	76.4373	2.27321e-18	9.23605e-17
ENSMUSG00000039982	207521	Dtx4	deltex 4, E3 ubiquitin ligase [Source:MGI Symbol;Acc:MGI:2672905]	1.43899	5.3521	76.4096	2.30523e-18	9.33915e-17
ENSMUSG00000027954	13636	Efna1	ephrin A1 [Source:MGI Symbol;Acc:MGI:103236]	3.45887	2.97751	76.1403	2.64214e-18	1.06733e-16
ENSMUSG00000035725	19108	Prkx	protein kinase, X-linked [Source:MGI Symbol;Acc:MGI:1309999]	-1.8119	3.80203	75.8122	3.1197e-18	1.25664e-16
ENSMUSG00000070867	666048	Trabd2b	TraB domain containing 2B [Source:MGI Symbol;Acc:MGI:3650152]	2.23315	3.28816	75.8009	3.13757e-18	1.26023e-16
ENSMUSG00000061731	14042	Ext1	exostoses (multiple) 1 [Source:MGI Symbol;Acc:MGI:894663]	1.47127	6.12217	75.448	3.75166e-18	1.50259e-16
ENSMUSG00000045733	212518	Sprn	shadow of prion protein [Source:MGI Symbol;Acc:MGI:3582583]	1.51758	7.8218	75.3703	3.90224e-18	1.55846e-16
ENSMUSG00000029999	21802	Tgfa	transforming growth factor alpha [Source:MGI Symbol;Acc:MGI:98724]	-1.93315	4.99334	75.2984	4.04683e-18	1.61162e-16
ENSMUSG00000021130	108760	Galnt16	UDP-N-acetyl-alpha-D-galactosamine:polypeptide N-acetylgalactosaminyltransferase 16 [Source:MGI Symbol;Acc:MGI:1917754]	1.66267	7.04198	74.926	4.88687e-18	1.94067e-16
ENSMUSG00000037362	18133	Nov	nephroblastoma overexpressed gene [Source:MGI Symbol;Acc:MGI:109185]	2.60111	6.18121	74.7166	5.43376e-18	2.15177e-16
ENSMUSG00000029361	18125	Nos1	nitric oxide synthase 1, neuronal [Source:MGI Symbol;Acc:MGI:97360]	-1.96903	5.38229	74.6753	5.54867e-18	2.1911e-16
ENSMUSG00000039058	229949	Ak5	adenylate kinase 5 [Source:MGI Symbol;Acc:MGI:2677491]	1.60595	6.48217	74.45	6.21931e-18	2.44905e-16
ENSMUSG00000033083	210789	Tbc1d4	TBC1 domain family, member 4 [Source:MGI Symbol;Acc:MGI:2429660]	-2.69722	3.0611	74.4434	6.24017e-18	2.4504e-16
ENSMUSG00000024940	16998	Ltbp3	latent transforming growth factor beta binding protein 3 [Source:MGI Symbol;Acc:MGI:1101355]	-2.09269	2.71863	74.3974	6.3873e-18	2.50119e-16
ENSMUSG00000027315	20732	Spint1	serine protease inhibitor, Kunitz type 1 [Source:MGI Symbol;Acc:MGI:1338033]	-3.52821	1.78297	74.3608	6.50696e-18	2.54097e-16
ENSMUSG00000013089	104156	Etv5	ets variant 5 [Source:MGI Symbol;Acc:MGI:1096867]	1.18443	6.00808	74.0776	7.5107e-18	2.9248e-16
ENSMUSG00000039954	269019	Stk32a	serine/threonine kinase 32A [Source:MGI Symbol;Acc:MGI:2442403]	-3.15869	2.10059	73.7447	8.89037e-18	3.45251e-16
ENSMUSG00000022790	207683	Igsf11	immunoglobulin superfamily, member 11 [Source:MGI Symbol;Acc:MGI:2388477]	-1.95479	5.3101	73.6947	9.11812e-18	3.5312e-16
ENSMUSG00000044167	56458	Foxo1	forkhead box O1 [Source:MGI Symbol;Acc:MGI:1890077]	-1.29002	5.40494	73.3946	1.06157e-17	4.09988e-16
ENSMUSG00000029442	269701	Wdr66	WD repeat domain 66 [Source:MGI Symbol;Acc:MGI:1918495]	2.69192	1.78807	73.1142	1.22358e-17	4.71263e-16
ENSMUSG00000053216	238555	Btn2a2	butyrophilin, subfamily 2, member A2 [Source:MGI Symbol;Acc:MGI:3606486]	-3.5857	0.828031	72.7847	1.44592e-17	5.55374e-16
ENSMUSG00000073877	100039863	Gm13306	predicted gene 13306 [Source:MGI Symbol;Acc:MGI:3713752]	2.8413	0.57524	72.5579	1.622e-17	6.21309e-16
ENSMUSG00000027210	17536	Meis2	Meis homeobox 2 [Source:MGI Symbol;Acc:MGI:108564]	-1.57076	6.69274	72.3938	1.76265e-17	6.7335e-16
ENSMUSG00000020656	195733	Grhl1	grainyhead-like 1 (Drosophila) [Source:MGI Symbol;Acc:MGI:2182540]	2.23534	2.72184	72.3714	1.78277e-17	6.79191e-16
ENSMUSG00000030500	140919	Slc17a6	solute carrier family 17 (sodium-dependent inorganic phosphate cotransporter), member 6 [Source:MGI Symbol;Acc:MGI:2156052]	3.02095	5.84565	72.3364	1.81472e-17	6.89494e-16
ENSMUSG00000024713	18552	Pcsk5	proprotein convertase subtilisin/kexin type 5 [Source:MGI Symbol;Acc:MGI:97515]	2.19852	5.07187	72.3087	1.84039e-17	6.97362e-16
ENSMUSG00000042826	14166	Fgf11	fibroblast growth factor 11 [Source:MGI Symbol;Acc:MGI:109167]	-1.98044	3.69923	72.302	1.84657e-17	6.97825e-16
ENSMUSG00000000782	21414	Tcf7	transcription factor 7, T cell specific [Source:MGI Symbol;Acc:MGI:98507]	-3.70333	1.12595	72.1541	1.99034e-17	7.50138e-16
ENSMUSG00000035620	237422	Ric8b	RIC8 guanine nucleotide exchange factor B [Source:MGI Symbol;Acc:MGI:2682307]	-1.29086	4.77565	71.9996	2.15242e-17	8.09058e-16
ENSMUSG00000030729	70974	Pgm2l1	phosphoglucomutase 2-like 1 [Source:MGI Symbol;Acc:MGI:1918224]	1.74747	8.63169	71.9536	2.20312e-17	8.25907e-16
ENSMUSG00000024517	225642	Grp	gastrin releasing peptide [Source:MGI Symbol;Acc:MGI:95833]	2.72088	3.74076	71.863	2.30669e-17	8.62431e-16
ENSMUSG00000079056	56461	Kcnip3	Kv channel interacting protein 3, calsenilin [Source:MGI Symbol;Acc:MGI:1929258]	1.84715	6.78286	71.7881	2.39596e-17	8.93432e-16
ENSMUSG00000043811	65079	Rtn4r	reticulon 4 receptor [Source:MGI Symbol;Acc:MGI:2136886]	2.53876	4.7935	71.7136	2.4881e-17	9.25336e-16
ENSMUSG00000019880	72780	Rspo3	R-spondin 3 [Source:MGI Symbol;Acc:MGI:1920030]	1.85585	4.54779	71.5691	2.67718e-17	9.9303e-16
ENSMUSG00000038764	545622	Ptpn3	protein tyrosine phosphatase, non-receptor type 3 [Source:MGI Symbol;Acc:MGI:105307]	1.78737	4.95198	71.503	2.76839e-17	1.02416e-15
ENSMUSG00000001520	60345	Nrip2	nuclear receptor interacting protein 2 [Source:MGI Symbol;Acc:MGI:1891884]	-1.73475	4.29972	71.0573	3.47002e-17	1.28035e-15
ENSMUSG00000033177	208171	Tmprss7	transmembrane serine protease 7 [Source:MGI Symbol;Acc:MGI:2686594]	2.65895	3.30239	70.9749	3.61805e-17	1.33148e-15
ENSMUSG00000033726	13796	Emx1	empty spiracles homeobox 1 [Source:MGI Symbol;Acc:MGI:95387]	3.03731	2.22279	70.7712	4.01143e-17	1.47239e-15
ENSMUSG00000008136	14200	Fhl2	four and a half LIM domains 2 [Source:MGI Symbol;Acc:MGI:1338762]	2.19741	5.53564	70.4799	4.64971e-17	1.70223e-15
ENSMUSG00000029816	93695	Gpnmb	glycoprotein (transmembrane) nmb [Source:MGI Symbol;Acc:MGI:1934765]	-3.00585	1.92108	70.3296	5.01792e-17	1.83226e-15
ENSMUSG00000030465	234353	Psd3	pleckstrin and Sec7 domain containing 3 [Source:MGI Symbol;Acc:MGI:1918215]	1.41964	8.22614	70.322	5.03717e-17	1.83452e-15
ENSMUSG00000027286	66606	Lrrc57	leucine rich repeat containing 57 [Source:MGI Symbol;Acc:MGI:1913856]	1.21017	5.71126	70.3145	5.05647e-17	1.83679e-15
ENSMUSG00000024521	58801	Pmaip1	phorbol-12-myristate-13-acetate-induced protein 1 [Source:MGI Symbol;Acc:MGI:1930146]	3.51887	0.473588	70.0467	5.79157e-17	2.0984e-15
ENSMUSG00000024074	50766	Crim1	cysteine rich transmembrane BMP regulator 1 (chordin like) [Source:MGI Symbol;Acc:MGI:1354756]	1.42554	5.93324	69.9997	5.93126e-17	2.14349e-15
ENSMUSG00000060962	73712	Dmkn	dermokine [Source:MGI Symbol;Acc:MGI:1920962]	-3.05063	3.89524	69.9596	6.05316e-17	2.18193e-15
ENSMUSG00000062252	328789	Lhfpl5	lipoma HMGIC fusion partner-like 5 [Source:MGI Symbol;Acc:MGI:1915382]	-2.28527	3.13388	69.8406	6.42949e-17	2.31166e-15
ENSMUSG00000020904	71860	Cfap52	cilia and flagella associated protein 52 [Source:MGI Symbol;Acc:MGI:1919110]	2.80648	0.649091	69.8114	6.52534e-17	2.34013e-15
ENSMUSG00000036578	57780	Fxyd7	FXYD domain-containing ion transport regulator 7 [Source:MGI Symbol;Acc:MGI:1889006]	1.84611	6.14197	69.3757	8.13872e-17	2.9113e-15
ENSMUSG00000019889	19272	Ptprk	protein tyrosine phosphatase, receptor type, K [Source:MGI Symbol;Acc:MGI:103310]	1.93963	5.49603	69.0905	9.40493e-17	3.3557e-15
ENSMUSG00000027489	56846	Necab3	N-terminal EF-hand calcium binding protein 3 [Source:MGI Symbol;Acc:MGI:1861721]	1.50597	5.85922	68.7877	1.09653e-16	3.90253e-15
ENSMUSG00000064179	21955	Tnnt1	troponin T1, skeletal, slow [Source:MGI Symbol;Acc:MGI:1333868]	-2.73648	1.56406	68.7603	1.11189e-16	3.9472e-15
ENSMUSG00000029134	665270	Plb1	phospholipase B1 [Source:MGI Symbol;Acc:MGI:1922406]	2.22178	2.80097	68.7284	1.13002e-16	4.00145e-15
ENSMUSG00000020912	268482	Krt12	keratin 12 [Source:MGI Symbol;Acc:MGI:96687]	2.16136	4.29849	68.6212	1.19316e-16	4.21443e-15
ENSMUSG00000049985	77318	Ankrd55	ankyrin repeat domain 55 [Source:MGI Symbol;Acc:MGI:1924568]	-3.01279	1.37862	68.5373	1.245e-16	4.38651e-15
ENSMUSG00000037306	230815	Man1c1	mannosidase, alpha, class 1C, member 1 [Source:MGI Symbol;Acc:MGI:2446214]	-1.32435	5.2609	67.9959	1.63832e-16	5.75788e-15
ENSMUSG00000042129	213391	Rassf4	Ras association (RalGDS/AF-6) domain family member 4 [Source:MGI Symbol;Acc:MGI:2386853]	-2.40295	2.74384	67.9305	1.69357e-16	5.9372e-15
ENSMUSG00000040751	56743	Lat2	linker for activation of T cells family, member 2 [Source:MGI Symbol;Acc:MGI:1926479]	2.73827	1.91983	67.8071	1.80302e-16	6.30519e-15
ENSMUSG00000020160	17268	Meis1	Meis homeobox 1 [Source:MGI Symbol;Acc:MGI:104717]	-2.84709	2.35913	67.7792	1.8287e-16	6.37912e-15
ENSMUSG00000023945	63993	Slc5a7	solute carrier family 5 (choline transporter), member 7 [Source:MGI Symbol;Acc:MGI:1927126]	-3.50473	2.20804	67.7003	1.90332e-16	6.62299e-15
ENSMUSG00000026163	77629	Sphkap	SPHK1 interactor, AKAP domain containing [Source:MGI Symbol;Acc:MGI:1924879]	1.58153	7.00566	67.5456	2.0587e-16	7.14597e-15
ENSMUSG00000002058	22248	Unc119	unc-119 lipid binding chaperone [Source:MGI Symbol;Acc:MGI:1328357]	-1.85199	3.79348	66.8122	2.98651e-16	1.0341e-14
ENSMUSG00000022441	77627	Efcab6	EF-hand calcium binding domain 6 [Source:MGI Symbol;Acc:MGI:1924877]	1.7436	1.44633	66.7702	3.05072e-16	1.05374e-14
ENSMUSG00000049112	18430	Oxtr	oxytocin receptor [Source:MGI Symbol;Acc:MGI:109147]	-2.00386	3.58666	66.6203	3.29177e-16	1.13421e-14
ENSMUSG00000000889	13166	Dbh	dopamine beta hydroxylase [Source:MGI Symbol;Acc:MGI:94864]	3.41452	0.853958	66.5905	3.34189e-16	1.14866e-14
ENSMUSG00000029177	12615	Cenpa	centromere protein A [Source:MGI Symbol;Acc:MGI:88375]	-2.68701	2.91214	66.4444	3.59907e-16	1.23404e-14
ENSMUSG00000040710	20452	St8sia4	ST8 alpha-N-acetyl-neuraminide alpha-2,8-sialyltransferase 4 [Source:MGI Symbol;Acc:MGI:106018]	-2.52971	3.54984	66.3803	3.71807e-16	1.27174e-14
ENSMUSG00000079110	12335	Capn3	calpain 3 [Source:MGI Symbol;Acc:MGI:107437]	2.47024	2.9755	66.3185	3.8364e-16	1.30903e-14
ENSMUSG00000003271	54200	Sult2b1	sulfotransferase family, cytosolic, 2B, member 1 [Source:MGI Symbol;Acc:MGI:1926342]	1.62378	3.67646	66.1151	4.25354e-16	1.44483e-14
ENSMUSG00000026156	280645	B3gat2	beta-1,3-glucuronyltransferase 2 (glucuronosyltransferase S) [Source:MGI Symbol;Acc:MGI:2389490]	-1.65997	3.29455	66.1144	4.25494e-16	1.44483e-14
ENSMUSG00000040972	230868	Igsf21	immunoglobulin superfamily, member 21 [Source:MGI Symbol;Acc:MGI:2681842]	1.58822	5.39175	66.045	4.40755e-16	1.49304e-14
ENSMUSG00000041669	170952	Prima1	proline rich membrane anchor 1 [Source:MGI Symbol;Acc:MGI:1926097]	-3.36478	0.0524177	65.9309	4.67001e-16	1.57815e-14
ENSMUSG00000044912	238266	Syt16	synaptotagmin XVI [Source:MGI Symbol;Acc:MGI:2673872]	1.36239	6.77706	65.7755	5.05324e-16	1.70356e-14
ENSMUSG00000016664	23970	Pacsin2	protein kinase C and casein kinase substrate in neurons 2 [Source:MGI Symbol;Acc:MGI:1345153]	-1.33343	5.25524	65.7237	5.18784e-16	1.74475e-14
ENSMUSG00000047228	232400	A2ml1	alpha-2-macroglobulin like 1 [Source:MGI Symbol;Acc:MGI:3039594]	2.23255	6.05988	65.6225	5.4612e-16	1.8323e-14
ENSMUSG00000030268	12035	Bcat1	branched chain aminotransferase 1, cytosolic [Source:MGI Symbol;Acc:MGI:104861]	-1.10823	6.84891	65.6137	5.48552e-16	1.83608e-14
ENSMUSG00000075270	241489	Pde11a	phosphodiesterase 11A [Source:MGI Symbol;Acc:MGI:3036251]	-2.97475	1.65125	65.5979	5.52969e-16	1.84647e-14
ENSMUSG00000100241	20508	Slc18a3	solute carrier family 18 (vesicular monoamine), member 3 [Source:MGI Symbol;Acc:MGI:1101061]	-4.4135	1.76365	65.5312	5.72007e-16	1.90552e-14
ENSMUSG00000038242	71872	Aox4	aldehyde oxidase 4 [Source:MGI Symbol;Acc:MGI:1919122]	2.90525	0.692915	65.5062	5.79303e-16	1.92526e-14
ENSMUSG00000031991	75469	Spata19	spermatogenesis associated 19 [Source:MGI Symbol;Acc:MGI:1922719]	3.41035	-0.0160341	65.3412	6.29918e-16	2.08853e-14
ENSMUSG00000027776	16159	Il12a	interleukin 12a [Source:MGI Symbol;Acc:MGI:96539]	2.97501	2.39023	65.1462	6.95429e-16	2.30031e-14
ENSMUSG00000027978	19142	Prss12	protease, serine 12 neurotrypsin (motopsin) [Source:MGI Symbol;Acc:MGI:1100881]	1.93096	4.78982	65.0587	7.27001e-16	2.3991e-14
ENSMUSG00000039131	54120	Gipc2	GIPC PDZ domain containing family, member 2 [Source:MGI Symbol;Acc:MGI:1889209]	-2.34302	1.59485	64.6219	9.074e-16	2.98741e-14
ENSMUSG00000022610	29857	Mapk12	mitogen-activated protein kinase 12 [Source:MGI Symbol;Acc:MGI:1353438]	2.28689	2.73664	64.431	9.99733e-16	3.2837e-14
ENSMUSG00000045912	237397	C2cd4c	C2 calcium-dependent domain containing 4C [Source:MGI Symbol;Acc:MGI:2685084]	1.82185	2.56644	64.4246	1.00296e-15	3.28664e-14
ENSMUSG00000025128	59058	Bhlhe22	basic helix-loop-helix family, member e22 [Source:MGI Symbol;Acc:MGI:1930001]	2.59007	4.12961	64.3658	1.03338e-15	3.37843e-14
ENSMUSG00000022696	320007	Sidt1	SID1 transmembrane family, member 1 [Source:MGI Symbol;Acc:MGI:2443155]	1.92677	6.84875	64.3387	1.04766e-15	3.41717e-14
ENSMUSG00000027996	20319	Sfrp2	secreted frizzled-related protein 2 [Source:MGI Symbol;Acc:MGI:108078]	-3.16154	2.01191	64.2586	1.09112e-15	3.55069e-14
ENSMUSG00000029219	231290	Slc10a4	solute carrier family 10 (sodium/bile acid cotransporter family), member 4 [Source:MGI Symbol;Acc:MGI:3606480]	-4.10998	1.79017	64.1735	1.1393e-15	3.69892e-14
ENSMUSG00000028266	16911	Lmo4	LIM domain only 4 [Source:MGI Symbol;Acc:MGI:109360]	1.50378	7.65238	64.1313	1.16397e-15	3.7703e-14
ENSMUSG00000057967	14172	Fgf18	fibroblast growth factor 18 [Source:MGI Symbol;Acc:MGI:1277980]	-2.18875	0.576794	64.0937	1.18643e-15	3.83421e-14
ENSMUSG00000049907	68939	Rasl11b	RAS-like, family 11, member B [Source:MGI Symbol;Acc:MGI:1916189]	1.54995	5.77859	64.0756	1.19736e-15	3.86065e-14
ENSMUSG00000026679	71233	Enkur	enkurin, TRPC channel interacting protein [Source:MGI Symbol;Acc:MGI:1918483]	2.52967	2.04707	64.0566	1.20896e-15	3.88913e-14
ENSMUSG00000075020	NA	Mir670hg	MIR670 host gene (non-protein coding) [Source:MGI Symbol;Acc:MGI:3041234]	-2.54585	2.99197	63.9399	1.28272e-15	4.11702e-14
ENSMUSG00000001103	NA	Sebox	SEBOX homeobox [Source:MGI Symbol;Acc:MGI:108012]	2.63934	1.53855	63.9281	1.29045e-15	4.13239e-14
ENSMUSG00000043067	244745	Dpy19l1	dpy-19-like 1 (C. elegans) [Source:MGI Symbol;Acc:MGI:1915685]	1.78504	7.29684	63.9003	1.30881e-15	4.18164e-14
ENSMUSG00000024990	19662	Rbp4	retinol binding protein 4, plasma [Source:MGI Symbol;Acc:MGI:97879]	-2.37063	5.11999	63.8892	1.31616e-15	4.1956e-14
ENSMUSG00000033278	19274	Ptprm	protein tyrosine phosphatase, receptor type, M [Source:MGI Symbol;Acc:MGI:102694]	-1.65468	5.3954	63.773	1.39616e-15	4.44054e-14
ENSMUSG00000039195	73737	1110008P14Rik	RIKEN cDNA 1110008P14 gene [Source:MGI Symbol;Acc:MGI:1920987]	1.64537	6.47409	63.675	1.46734e-15	4.65641e-14
ENSMUSG00000055723	66922	Rras2	related RAS viral (r-ras) oncogene 2 [Source:MGI Symbol;Acc:MGI:1914172]	1.77493	4.50197	63.5657	1.55103e-15	4.91091e-14
ENSMUSG00000042064	329421	Myo3b	myosin IIIB [Source:MGI Symbol;Acc:MGI:2448580]	-3.54138	-0.0758469	63.5482	1.56494e-15	4.94379e-14
ENSMUSG00000026321	21934	Tnfrsf11a	tumor necrosis factor receptor superfamily, member 11a, NFKB activator [Source:MGI Symbol;Acc:MGI:1314891]	2.14392	2.33664	63.4356	1.65698e-15	5.22285e-14
ENSMUSG00000027490	13555	E2f1	E2F transcription factor 1 [Source:MGI Symbol;Acc:MGI:101941]	1.41695	3.68866	63.1924	1.87467e-15	5.89576e-14
ENSMUSG00000012126	67586	Ubxn11	UBX domain protein 11 [Source:MGI Symbol;Acc:MGI:1914836]	1.29065	3.24486	63.1311	1.93399e-15	6.06876e-14
ENSMUSG00000029090	70693	Adgra3	adhesion G protein-coupled receptor A3 [Source:MGI Symbol;Acc:MGI:1917943]	-1.6496	4.52864	63.0506	2.01462e-15	6.3077e-14
ENSMUSG00000022021	56419	Diaph3	diaphanous related formin 3 [Source:MGI Symbol;Acc:MGI:1927222]	2.28418	2.80953	62.878	2.1991e-15	6.86999e-14
ENSMUSG00000030669	12310	Calca	calcitonin/calcitonin-related polypeptide, alpha [Source:MGI Symbol;Acc:MGI:2151253]	-3.14325	2.2713	62.8466	2.23453e-15	6.9652e-14
ENSMUSG00000024776	76630	Stambpl1	STAM binding protein like 1 [Source:MGI Symbol;Acc:MGI:1923880]	-1.287	4.24152	62.5599	2.58464e-15	8.0387e-14
ENSMUSG00000063011	56047	Msln	mesothelin [Source:MGI Symbol;Acc:MGI:1888992]	3.01545	1.68962	62.3998	2.8035e-15	8.70013e-14
ENSMUSG00000055078	110886	Gabra5	gamma-aminobutyric acid (GABA) A receptor, subunit alpha 5 [Source:MGI Symbol;Acc:MGI:95617]	1.7508	6.93328	62.1794	3.13557e-15	9.70923e-14
ENSMUSG00000034701	18012	Neurod1	neurogenic differentiation 1 [Source:MGI Symbol;Acc:MGI:1339708]	2.96369	4.0225	62.1098	3.24823e-15	1.0036e-13
ENSMUSG00000056854	18994	Pou3f4	POU domain, class 3, transcription factor 4 [Source:MGI Symbol;Acc:MGI:101894]	-2.08249	2.04549	61.8554	3.69636e-15	1.1374e-13
ENSMUSG00000038175	218203	Mylip	myosin regulatory light chain interacting protein [Source:MGI Symbol;Acc:MGI:2388271]	1.52517	3.94296	61.8547	3.6975e-15	1.1374e-13
ENSMUSG00000044252	64291	Osbpl1a	oxysterol binding protein-like 1A [Source:MGI Symbol;Acc:MGI:1927551]	1.1149	8.76935	61.8178	3.76759e-15	1.15644e-13
ENSMUSG00000028865	69655	Cd164l2	CD164 sialomucin-like 2 [Source:MGI Symbol;Acc:MGI:1916905]	-1.34493	3.03258	61.3924	4.67623e-15	1.43221e-13
ENSMUSG00000033308	99586	Dpyd	dihydropyrimidine dehydrogenase [Source:MGI Symbol;Acc:MGI:2139667]	2.29497	1.86478	61.1809	5.2064e-15	1.59112e-13
ENSMUSG00000031557	83436	Plekha2	pleckstrin homology domain-containing, family A (phosphoinositide binding specific) member 2 [Source:MGI Symbol;Acc:MGI:1928144]	1.48742	3.64381	61.1143	5.38544e-15	1.64227e-13
ENSMUSG00000093536	100042450	Smim17	small integral membrane protein 17 [Source:MGI Symbol;Acc:MGI:4365374]	-1.73879	2.33828	61.0815	5.4759e-15	1.66624e-13
ENSMUSG00000002105	68427	Slc39a13	solute carrier family 39 (metal ion transporter), member 13 [Source:MGI Symbol;Acc:MGI:1915677]	-1.70873	3.78064	61.058	5.54176e-15	1.68263e-13
ENSMUSG00000037973	232016	Ccdc129	coiled-coil domain containing 129 [Source:MGI Symbol;Acc:MGI:2685304]	2.60015	1.22691	60.956	5.83645e-15	1.76829e-13
ENSMUSG00000055214	319455	Pld5	phospholipase D family, member 5 [Source:MGI Symbol;Acc:MGI:2442056]	-1.90042	3.54327	60.8797	6.06698e-15	1.83418e-13
ENSMUSG00000037824	52588	Tspan14	tetraspanin 14 [Source:MGI Symbol;Acc:MGI:1196325]	1.59752	6.19842	60.7621	6.44054e-15	1.94294e-13
ENSMUSG00000019146	12300	Cacng2	calcium channel, voltage-dependent, gamma subunit 2 [Source:MGI Symbol;Acc:MGI:1316660]	-1.3458	6.28193	60.6194	6.92491e-15	2.08459e-13
ENSMUSG00000045875	11549	Adra1a	adrenergic receptor, alpha 1a [Source:MGI Symbol;Acc:MGI:104773]	-1.46911	4.33572	60.5209	7.27997e-15	2.18679e-13
ENSMUSG00000039257	58188	Vstm2b	V-set and transmembrane domain containing 2B [Source:MGI Symbol;Acc:MGI:1914525]	-1.37412	4.70648	60.4897	7.39639e-15	2.21702e-13
ENSMUSG00000019935	216227	Slc17a8	solute carrier family 17 (sodium-dependent inorganic phosphate cotransporter), member 8 [Source:MGI Symbol;Acc:MGI:3039629]	-2.27815	2.02029	60.3094	8.10606e-15	2.42457e-13
ENSMUSG00000020723	54377	Cacng4	calcium channel, voltage-dependent, gamma subunit 4 [Source:MGI Symbol;Acc:MGI:1859167]	-2.30584	6.02059	60.2735	8.25494e-15	2.46386e-13
ENSMUSG00000002504	65962	Slc9a3r2	solute carrier family 9 (sodium/hydrogen exchanger), member 3 regulator 2 [Source:MGI Symbol;Acc:MGI:1890662]	-1.65723	4.17631	59.81	1.04472e-14	3.11159e-13
ENSMUSG00000063446	272031	Plppr1	phospholipid phosphatase related 1 [Source:MGI Symbol;Acc:MGI:2445015]	-2.22149	3.91443	59.7388	1.08322e-14	3.21942e-13
ENSMUSG00000063415	232174	Cyp26b1	cytochrome P450, family 26, subfamily b, polypeptide 1 [Source:MGI Symbol;Acc:MGI:2176159]	2.11427	2.48035	59.5567	1.18821e-14	3.52401e-13
ENSMUSG00000030518	70638	Fam189a1	family with sequence similarity 189, member A1 [Source:MGI Symbol;Acc:MGI:1917888]	1.20435	6.39363	59.4076	1.28174e-14	3.79341e-13
ENSMUSG00000022842	107522	Ece2	endothelin converting enzyme 2 [Source:MGI Symbol;Acc:MGI:1101356]	-1.64372	3.86404	59.252	1.38719e-14	4.09688e-13
ENSMUSG00000097184	NA	4632428C04Rik	RIKEN cDNA 4632428C04 gene [Source:MGI Symbol;Acc:MGI:1921600]	-2.46824	0.255765	59.156	1.45653e-14	4.29264e-13
ENSMUSG00000041272	252838	Tox	thymocyte selection-associated high mobility group box [Source:MGI Symbol;Acc:MGI:2181659]	1.71823	5.63582	59.1247	1.47992e-14	4.35244e-13
ENSMUSG00000015890	71761	Amdhd1	amidohydrolase domain containing 1 [Source:MGI Symbol;Acc:MGI:1919011]	2.96531	1.62092	59.1036	1.49585e-14	4.39011e-13
ENSMUSG00000053783	74230	1700016K19Rik	RIKEN cDNA 1700016K19 gene [Source:MGI Symbol;Acc:MGI:1921480]	2.6687	1.01721	58.9186	1.64335e-14	4.81296e-13
ENSMUSG00000022508	12053	Bcl6	B cell leukemia/lymphoma 6 [Source:MGI Symbol;Acc:MGI:107187]	1.19253	3.96548	58.7508	1.78963e-14	5.23048e-13
ENSMUSG00000049556	235402	Lingo1	leucine rich repeat and Ig domain containing 1 [Source:MGI Symbol;Acc:MGI:1915522]	2.03263	7.67392	58.5497	1.98224e-14	5.78139e-13
ENSMUSG00000055775	17885	Myh8	myosin, heavy polypeptide 8, skeletal muscle, perinatal [Source:MGI Symbol;Acc:MGI:1339712]	-3.66178	-0.170756	58.5428	1.98915e-14	5.78954e-13
ENSMUSG00000023886	64074	Smoc2	SPARC related modular calcium binding 2 [Source:MGI Symbol;Acc:MGI:1929881]	2.04267	3.64681	58.5334	1.99871e-14	5.80536e-13
ENSMUSG00000070866	241514	Zfp804a	zinc finger protein 804A [Source:MGI Symbol;Acc:MGI:2442949]	-1.96715	4.83161	58.1142	2.4733e-14	7.16901e-13
ENSMUSG00000024534	67847	Sncaip	synuclein, alpha interacting protein (synphilin) [Source:MGI Symbol;Acc:MGI:1915097]	-2.14686	1.72184	57.9388	2.70399e-14	7.82154e-13
ENSMUSG00000044461	219134	Shisa2	shisa family member 2 [Source:MGI Symbol;Acc:MGI:2444716]	-1.80931	1.41537	57.8437	2.83791e-14	8.19205e-13
ENSMUSG00000034109	73124	Golim4	golgi integral membrane protein 4 [Source:MGI Symbol;Acc:MGI:1920374]	-1.81722	4.05314	57.7088	3.03936e-14	8.75561e-13
ENSMUSG00000049928	93896	Glp2r	glucagon-like peptide 2 receptor [Source:MGI Symbol;Acc:MGI:2136733]	2.93409	2.22855	57.6351	3.15551e-14	9.0716e-13
ENSMUSG00000024376	13824	Epb41l4a	erythrocyte membrane protein band 4.1 like 4a [Source:MGI Symbol;Acc:MGI:103007]	-2.18387	1.80064	57.586	3.23514e-14	9.28154e-13
ENSMUSG00000022257	114128	Laptm4b	lysosomal-associated protein transmembrane 4B [Source:MGI Symbol;Acc:MGI:1890494]	-1.45868	6.94966	57.5441	3.30481e-14	9.46212e-13
ENSMUSG00000039579	242443	Grin3a	glutamate receptor ionotropic, NMDA3A [Source:MGI Symbol;Acc:MGI:1933206]	-1.38635	6.52535	57.3884	3.57708e-14	1.02208e-12
ENSMUSG00000068744	56742	Psrc1	proline/serine-rich coiled-coil 1 [Source:MGI Symbol;Acc:MGI:1913099]	2.46284	1.40372	57.3834	3.58616e-14	1.0226e-12
ENSMUSG00000031665	58198	Sall1	sal-like 1 (Drosophila) [Source:MGI Symbol;Acc:MGI:1889585]	-2.2485	3.41109	57.2816	3.77673e-14	1.07476e-12
ENSMUSG00000051000	229488	Fam160a1	family with sequence similarity 160, member A1 [Source:MGI Symbol;Acc:MGI:2444746]	2.22347	1.30209	57.2729	3.79353e-14	1.07736e-12
ENSMUSG00000021919	12647	Chat	choline acetyltransferase [Source:MGI Symbol;Acc:MGI:88392]	-3.50146	1.36424	57.1814	3.97415e-14	1.12638e-12
ENSMUSG00000020019	57764	Ntn4	netrin 4 [Source:MGI Symbol;Acc:MGI:1888978]	-2.27981	1.85049	57.1403	4.05814e-14	1.14787e-12
ENSMUSG00000037703	241638	Lzts3	leucine zipper, putative tumor suppressor family member 3 [Source:MGI Symbol;Acc:MGI:2656976]	-0.928779	6.11422	57.074	4.19708e-14	1.18479e-12
ENSMUSG00000030270	211232	Cpne9	copine family member IX [Source:MGI Symbol;Acc:MGI:2443052]	1.38166	4.78857	56.842	4.72273e-14	1.3305e-12
ENSMUSG00000023966	75564	Rsph9	radial spoke head 9 homolog (Chlamydomonas) [Source:MGI Symbol;Acc:MGI:1922814]	1.35549	5.12979	56.582	5.3904e-14	1.51557e-12
ENSMUSG00000020737	15374	Hn1	hematological and neurological expressed sequence 1 [Source:MGI Symbol;Acc:MGI:1096361]	1.00622	6.03909	56.4847	5.66371e-14	1.58923e-12
ENSMUSG00000059900	94346	Tmem40	transmembrane protein 40 [Source:MGI Symbol;Acc:MGI:2137870]	3.083	1.64213	56.3615	6.02991e-14	1.68861e-12
ENSMUSG00000046318	320924	Ccbe1	collagen and calcium binding EGF domains 1 [Source:MGI Symbol;Acc:MGI:2445053]	2.073	2.5103	56.2184	6.48525e-14	1.81252e-12
ENSMUSG00000032788	216134	Pdxk	pyridoxal (pyridoxine, vitamin B6) kinase [Source:MGI Symbol;Acc:MGI:1351869]	-1.47929	6.7292	56.1865	6.59124e-14	1.83849e-12
ENSMUSG00000039835	215819	Nhsl1	NHS-like 1 [Source:MGI Symbol;Acc:MGI:106390]	2.39225	4.87043	56.1669	6.65719e-14	1.8532e-12
ENSMUSG00000097789	NA	Gm2115	predicted gene 2115 [Source:MGI Symbol;Acc:MGI:3780284]	-2.91744	1.90825	56.0298	7.13813e-14	1.98316e-12
ENSMUSG00000039552	212892	Rsph4a	radial spoke head 4 homolog A (Chlamydomonas) [Source:MGI Symbol;Acc:MGI:3027894]	2.55808	1.20506	56.0033	7.23493e-14	2.00609e-12
ENSMUSG00000042045	66402	Sln	sarcolipin [Source:MGI Symbol;Acc:MGI:1913652]	-2.67386	2.70342	55.9651	7.37683e-14	2.04141e-12
ENSMUSG00000022235	69574	Cmbl	carboxymethylenebutenolidase-like (Pseudomonas) [Source:MGI Symbol;Acc:MGI:1916824]	1.87523	3.60692	55.8461	7.8371e-14	2.16452e-12
ENSMUSG00000019066	19340	Rab3d	RAB3D, member RAS oncogene family [Source:MGI Symbol;Acc:MGI:97844]	1.32424	3.34433	55.7586	8.19374e-14	2.25858e-12
ENSMUSG00000043659	319239	Npsr1	neuropeptide S receptor 1 [Source:MGI Symbol;Acc:MGI:2441738]	3.40744	1.76056	55.7022	8.43256e-14	2.31986e-12
ENSMUSG00000035273	15442	Hpse	heparanase [Source:MGI Symbol;Acc:MGI:1343124]	-2.17634	1.26949	55.6953	8.46185e-14	2.32337e-12
ENSMUSG00000006389	17480	Mpl	myeloproliferative leukemia virus oncogene [Source:MGI Symbol;Acc:MGI:97076]	3.10771	0.847049	55.6207	8.78949e-14	2.40863e-12
ENSMUSG00000044788	328035	Fads6	fatty acid desaturase domain family, member 6 [Source:MGI Symbol;Acc:MGI:3039592]	-1.60238	3.78797	55.6164	8.80869e-14	2.40919e-12
ENSMUSG00000022894	23794	Adamts5	a disintegrin-like and metallopeptidase (reprolysin type) with thrombospondin type 1 motif, 5 (aggrecanase-2) [Source:MGI Symbol;Acc:MGI:1346321]	-2.03339	2.12338	55.526	9.22289e-14	2.51758e-12
ENSMUSG00000046093	170638	Hpcal4	hippocalcin-like 4 [Source:MGI Symbol;Acc:MGI:2157521]	1.16638	9.33108	55.5155	9.27238e-14	2.52618e-12
ENSMUSG00000048482	12064	Bdnf	brain derived neurotrophic factor [Source:MGI Symbol;Acc:MGI:88145]	3.08311	6.48322	55.4068	9.79968e-14	2.66468e-12
ENSMUSG00000037465	21847	Klf10	Kruppel-like factor 10 [Source:MGI Symbol;Acc:MGI:1101353]	2.0315	5.60612	55.0719	1.16199e-13	3.15353e-12
ENSMUSG00000032590	235606	Apeh	acylpeptide hydrolase [Source:MGI Symbol;Acc:MGI:88041]	-1.62272	3.96834	55.0333	1.18504e-13	3.20988e-12
ENSMUSG00000027257	80708	Pacsin3	protein kinase C and casein kinase substrate in neurons 3 [Source:MGI Symbol;Acc:MGI:1891410]	1.99578	2.92175	55.0278	1.18838e-13	3.21274e-12
ENSMUSG00000034993	26949	Vat1	vesicle amine transport 1 [Source:MGI Symbol;Acc:MGI:1349450]	-2.02092	3.27262	54.9391	1.24322e-13	3.35455e-12
ENSMUSG00000027381	12125	Bcl2l11	BCL2-like 11 (apoptosis facilitator) [Source:MGI Symbol;Acc:MGI:1197519]	-1.56393	2.85014	54.8436	1.30513e-13	3.51486e-12
ENSMUSG00000068196	12837	Col8a1	collagen, type VIII, alpha 1 [Source:MGI Symbol;Acc:MGI:88463]	2.54695	2.63347	54.7233	1.38751e-13	3.72956e-12
ENSMUSG00000036196	224661	Slc26a8	solute carrier family 26, member 8 [Source:MGI Symbol;Acc:MGI:2385046]	2.07976	1.7826	54.668	1.42715e-13	3.82879e-12
ENSMUSG00000019820	22288	Utrn	utrophin [Source:MGI Symbol;Acc:MGI:104631]	-1.3604	6.41101	54.6105	1.46952e-13	3.93495e-12
ENSMUSG00000026483	63913	Fam129a	family with sequence similarity 129, member A [Source:MGI Symbol;Acc:MGI:2137237]	-2.92577	1.39725	54.5706	1.49961e-13	4.00788e-12
ENSMUSG00000001943	57276	Vsig2	V-set and immunoglobulin domain containing 2 [Source:MGI Symbol;Acc:MGI:1928009]	1.67741	2.06513	54.4913	1.56135e-13	4.16497e-12
ENSMUSG00000024556	107029	Me2	malic enzyme 2, NAD(+)-dependent, mitochondrial [Source:MGI Symbol;Acc:MGI:2147351]	-1.35846	4.28915	54.3615	1.66798e-13	4.441e-12
ENSMUSG00000021108	18755	Prkch	protein kinase C, eta [Source:MGI Symbol;Acc:MGI:97600]	-2.53386	2.5643	54.2973	1.72337e-13	4.57981e-12
ENSMUSG00000022636	11658	Alcam	activated leukocyte cell adhesion molecule [Source:MGI Symbol;Acc:MGI:1313266]	-1.5148	8.16063	54.2475	1.76763e-13	4.68855e-12
ENSMUSG00000048616	18121	Nog	noggin [Source:MGI Symbol;Acc:MGI:104327]	-2.07958	2.71965	54.2279	1.78535e-13	4.72663e-12
ENSMUSG00000022607	14083	Ptk2	PTK2 protein tyrosine kinase 2 [Source:MGI Symbol;Acc:MGI:95481]	0.934226	6.3459	54.1124	1.89345e-13	5.00341e-12
ENSMUSG00000097146	NA	Gm4211	predicted gene 4211 [Source:MGI Symbol;Acc:MGI:3782387]	-2.34731	0.859492	53.9036	2.10574e-13	5.55393e-12
ENSMUSG00000084890	NA	A830036E02Rik	RIKEN cDNA A830036E02 gene [Source:MGI Symbol;Acc:MGI:3686876]	2.0319	5.13891	53.8483	2.16583e-13	5.70172e-12
ENSMUSG00000027247	228359	Arhgap1	Rho GTPase activating protein 1 [Source:MGI Symbol;Acc:MGI:2445003]	1.0609	6.32883	53.8211	2.19602e-13	5.77041e-12
ENSMUSG00000044864	99696	Ankrd50	ankyrin repeat domain 50 [Source:MGI Symbol;Acc:MGI:2139777]	-1.00477	4.99848	53.7708	2.25293e-13	5.90889e-12
ENSMUSG00000040703	74134	Cyp2s1	cytochrome P450, family 2, subfamily s, polypeptide 1 [Source:MGI Symbol;Acc:MGI:1921384]	-2.19573	2.58333	53.6718	2.36935e-13	6.20266e-12
ENSMUSG00000030854	19259	Ptpn5	protein tyrosine phosphatase, non-receptor type 5 [Source:MGI Symbol;Acc:MGI:97807]	-1.16322	7.62566	53.5481	2.52332e-13	6.59346e-12
ENSMUSG00000001666	13202	Ddt	D-dopachrome tautomerase [Source:MGI Symbol;Acc:MGI:1298381]	-1.61641	4.20362	53.4217	2.69109e-13	7.01879e-12
ENSMUSG00000024525	114663	Impa2	inositol (myo)-1(or 4)-monophosphatase 2 [Source:MGI Symbol;Acc:MGI:2149728]	-2.28836	1.35771	53.4178	2.69637e-13	7.01956e-12
ENSMUSG00000062098	228662	Btbd3	BTB (POZ) domain containing 3 [Source:MGI Symbol;Acc:MGI:2385155]	-1.13294	7.41774	53.4109	2.70592e-13	7.02595e-12
ENSMUSG00000006219	74202	Fblim1	filamin binding LIM protein 1 [Source:MGI Symbol;Acc:MGI:1921452]	-2.59458	1.14408	53.4088	2.70883e-13	7.02595e-12
ENSMUSG00000024219	224650	Anks1	ankyrin repeat and SAM domain containing 1 [Source:MGI Symbol;Acc:MGI:2446180]	-1.91029	3.24098	53.3915	2.73281e-13	7.0751e-12
ENSMUSG00000032846	67263	Zswim6	zinc finger SWIM-type containing 6 [Source:MGI Symbol;Acc:MGI:1914513]	-1.3438	3.59631	53.3836	2.74375e-13	7.09036e-12
ENSMUSG00000032297	76183	Celf6	CUGBP, Elav-like family member 6 [Source:MGI Symbol;Acc:MGI:1923433]	-1.81906	3.29171	53.3044	2.85662e-13	7.3685e-12
ENSMUSG00000022843	12724	Clcn2	chloride channel, voltage-sensitive 2 [Source:MGI Symbol;Acc:MGI:105061]	1.76211	5.24362	53.295	2.87036e-13	7.3904e-12
ENSMUSG00000053063	232413	Clec12a	C-type lectin domain family 12, member a [Source:MGI Symbol;Acc:MGI:3040968]	-3.93522	0.963849	53.1453	3.09766e-13	7.96104e-12
ENSMUSG00000026354	226413	Lct	lactase [Source:MGI Symbol;Acc:MGI:104576]	2.11657	2.02091	53.1254	3.12924e-13	8.02754e-12
ENSMUSG00000045034	218440	Ankrd34b	ankyrin repeat domain 34B [Source:MGI Symbol;Acc:MGI:2443245]	-1.62608	2.85794	53.0878	3.18962e-13	8.16752e-12
ENSMUSG00000021379	15904	Id4	inhibitor of DNA binding 4 [Source:MGI Symbol;Acc:MGI:99414]	-2.91638	4.33872	53.0101	3.3184e-13	8.47627e-12
ENSMUSG00000024427	24066	Spry4	sprouty homolog 4 (Drosophila) [Source:MGI Symbol;Acc:MGI:1345144]	-1.64116	3.8827	53.0078	3.32225e-13	8.47627e-12
ENSMUSG00000005107	117591	Slc2a9	solute carrier family 2 (facilitated glucose transporter), member 9 [Source:MGI Symbol;Acc:MGI:2152844]	5.1036	-0.503114	52.9183	3.47714e-13	8.85537e-12
ENSMUSG00000039115	104099	Itga9	integrin alpha 9 [Source:MGI Symbol;Acc:MGI:104756]	-1.82425	2.97867	52.8763	3.55232e-13	9.03046e-12
ENSMUSG00000074637	20674	Sox2	SRY (sex determining region Y)-box 2 [Source:MGI Symbol;Acc:MGI:98364]	-3.32258	3.7082	52.8464	3.60671e-13	9.15218e-12
ENSMUSG00000035594	110835	Chrna5	cholinergic receptor, nicotinic, alpha polypeptide 5 [Source:MGI Symbol;Acc:MGI:87889]	-2.37653	1.72575	52.7599	3.76918e-13	9.54365e-12
ENSMUSG00000029007	11610	Agtrap	angiotensin II, type I receptor-associated protein [Source:MGI Symbol;Acc:MGI:1339977]	-2.32299	3.06193	52.7571	3.77455e-13	9.54365e-12
ENSMUSG00000042514	225266	Klhl14	kelch-like 14 [Source:MGI Symbol;Acc:MGI:1921249]	-2.26158	0.859983	52.5591	4.17498e-13	1.05371e-11
ENSMUSG00000055523	73707	Gucy2g	guanylate cyclase 2g [Source:MGI Symbol;Acc:MGI:106025]	2.21036	2.54815	52.5054	4.29061e-13	1.08096e-11
ENSMUSG00000074896	15959	Ifit3	interferon-induced protein with tetratricopeptide repeats 3 [Source:MGI Symbol;Acc:MGI:1101055]	-2.56371	2.86595	52.4892	4.32616e-13	1.08796e-11
ENSMUSG00000050211	329502	Pla2g4e	phospholipase A2, group IVE [Source:MGI Symbol;Acc:MGI:1919144]	1.96953	3.53884	52.4803	4.34594e-13	1.09099e-11
ENSMUSG00000028527	11639	Ak4	adenylate kinase 4 [Source:MGI Symbol;Acc:MGI:87979]	1.86133	4.71666	52.45	4.41347e-13	1.10596e-11
ENSMUSG00000061298	78933	Agbl4	ATP/GTP binding protein-like 4 [Source:MGI Symbol;Acc:MGI:1918244]	1.66267	3.47196	52.4446	4.42566e-13	1.10705e-11
ENSMUSG00000022454	54003	Nell2	NEL-like 2 [Source:MGI Symbol;Acc:MGI:1858510]	1.79652	9.87804	52.2791	4.81478e-13	1.20224e-11
ENSMUSG00000022055	18039	Nefl	neurofilament, light polypeptide [Source:MGI Symbol;Acc:MGI:97313]	1.12111	8.88832	52.2656	4.84795e-13	1.20838e-11
ENSMUSG00000033377	114301	Palmd	palmdelphin [Source:MGI Symbol;Acc:MGI:2148896]	2.00591	3.88789	52.2363	4.92092e-13	1.2244e-11
ENSMUSG00000097636	NA	Mirt1	myocardial infarction associated transcript 1 [Source:MGI Symbol;Acc:MGI:1922001]	2.04238	1.42768	51.9683	5.6405e-13	1.40096e-11
ENSMUSG00000051435	329977	Fhad1	forkhead-associated (FHA) phosphopeptide binding domain 1 [Source:MGI Symbol;Acc:MGI:1920323]	1.6869	1.94028	51.8596	5.96131e-13	1.47803e-11
ENSMUSG00000022018	66214	Rgcc	regulator of cell cycle [Source:MGI Symbol;Acc:MGI:1913464]	-2.32941	3.16624	51.8518	5.98518e-13	1.48133e-11
ENSMUSG00000067369	215201	Trmt2b	TRM2 tRNA methyltransferase 2B [Source:MGI Symbol;Acc:MGI:2442530]	-1.77276	3.7279	51.7756	6.22193e-13	1.53722e-11
ENSMUSG00000022382	22422	Wnt7b	wingless-type MMTV integration site family, member 7B [Source:MGI Symbol;Acc:MGI:98962]	2.38065	2.73672	51.7433	6.32536e-13	1.56003e-11
ENSMUSG00000027297	17005	Ltk	leukocyte tyrosine kinase [Source:MGI Symbol;Acc:MGI:96840]	1.83485	3.96132	51.6783	6.53828e-13	1.60972e-11
ENSMUSG00000017670	140579	Elmo2	engulfment and cell motility 2 [Source:MGI Symbol;Acc:MGI:2153045]	1.05826	7.03921	51.6641	6.58548e-13	1.61851e-11
ENSMUSG00000054889	109620	Dsp	desmoplakin [Source:MGI Symbol;Acc:MGI:109611]	2.83698	2.24793	51.6193	6.73749e-13	1.65298e-11
ENSMUSG00000022103	14586	Gfra2	glial cell line derived neurotrophic factor family receptor alpha 2 [Source:MGI Symbol;Acc:MGI:1195462]	1.94975	5.65325	51.4623	7.29866e-13	1.78754e-11
ENSMUSG00000059173	18573	Pde1a	phosphodiesterase 1A, calmodulin-dependent [Source:MGI Symbol;Acc:MGI:1201792]	1.70779	7.74271	51.4004	7.5323e-13	1.84155e-11
ENSMUSG00000039713	269608	Plekhg5	pleckstrin homology domain containing, family G (with RhoGef domain) member 5 [Source:MGI Symbol;Acc:MGI:2652860]	1.34088	4.95353	51.3676	7.65915e-13	1.86931e-11
ENSMUSG00000049946	234290	BC030500	cDNA sequence BC030500 [Source:MGI Symbol;Acc:MGI:2447770]	-1.4619	3.82945	51.2797	8.00998e-13	1.95155e-11
ENSMUSG00000031758	75796	Cdyl2	chromodomain protein, Y chromosome-like 2 [Source:MGI Symbol;Acc:MGI:1923046]	1.07435	5.11848	51.2514	8.12609e-13	1.9758e-11
ENSMUSG00000035033	21375	Tbr1	T-box brain gene 1 [Source:MGI Symbol;Acc:MGI:107404]	2.25215	5.81826	51.2487	8.13762e-13	1.9758e-11
ENSMUSG00000097622	NA	A330033J07Rik	RIKEN cDNA A330033J07 gene [Source:MGI Symbol;Acc:MGI:2444369]	-3.00327	0.086252	51.2205	8.25515e-13	2.00088e-11
ENSMUSG00000038331	212712	Satb2	special AT-rich sequence binding protein 2 [Source:MGI Symbol;Acc:MGI:2679336]	2.61091	5.32886	51.1605	8.51123e-13	2.0594e-11
ENSMUSG00000041734	170643	Kirrel	kin of IRRE like (Drosophila) [Source:MGI Symbol;Acc:MGI:1891396]	-2.22	1.15383	51.1542	8.5388e-13	2.06252e-11
ENSMUSG00000038718	18516	Pbx3	pre B cell leukemia homeobox 3 [Source:MGI Symbol;Acc:MGI:97496]	-1.67961	3.97762	51.0789	8.87252e-13	2.13945e-11
ENSMUSG00000015766	13860	Eps8	epidermal growth factor receptor pathway substrate 8 [Source:MGI Symbol;Acc:MGI:104684]	-2.41366	4.79645	50.9966	9.25264e-13	2.22729e-11
ENSMUSG00000073643	69368	Wdfy1	WD repeat and FYVE domain containing 1 [Source:MGI Symbol;Acc:MGI:1916618]	1.51961	5.01655	50.9803	9.32965e-13	2.24199e-11
ENSMUSG00000032440	21813	Tgfbr2	transforming growth factor, beta receptor II [Source:MGI Symbol;Acc:MGI:98729]	-2.43334	3.07757	50.9064	9.68777e-13	2.32407e-11
ENSMUSG00000004455	19047	Ppp1cc	protein phosphatase 1, catalytic subunit, gamma isoform [Source:MGI Symbol;Acc:MGI:104872]	-1.34901	1.58891	50.8765	9.83656e-13	2.35575e-11
ENSMUSG00000036062	230085	Phf24	PHD finger protein 24 [Source:MGI Symbol;Acc:MGI:2140712]	1.00751	7.73711	50.7845	1.03086e-12	2.4646e-11
ENSMUSG00000028926	18647	Cdk14	cyclin-dependent kinase 14 [Source:MGI Symbol;Acc:MGI:894318]	1.10892	7.96673	50.726	1.06202e-12	2.53479e-11
ENSMUSG00000026418	21952	Tnni1	troponin I, skeletal, slow 1 [Source:MGI Symbol;Acc:MGI:105073]	-1.89628	3.37135	50.6342	1.11289e-12	2.6517e-11
ENSMUSG00000091387	218476	Gcnt4	glucosaminyl (N-acetyl) transferase 4, core 2 (beta-1,6-N-acetylglucosaminyltransferase) [Source:MGI Symbol;Acc:MGI:2684919]	2.41672	2.96119	50.534	1.17121e-12	2.78593e-11
ENSMUSG00000036545	216725	Adamts2	a disintegrin-like and metallopeptidase (reprolysin type) with thrombospondin type 1 motif, 2 [Source:MGI Symbol;Acc:MGI:1347356]	1.85801	3.20169	50.5025	1.19014e-12	2.82619e-11
ENSMUSG00000050989	74777	Selenon	selenoprotein N [Source:MGI Symbol;Acc:MGI:2151208]	-1.17069	4.0843	50.4734	1.20793e-12	2.86359e-11
ENSMUSG00000032340	18007	Neo1	neogenin [Source:MGI Symbol;Acc:MGI:1097159]	1.2169	6.48144	50.2196	1.37471e-12	3.25347e-11
ENSMUSG00000031490	13685	Eif4ebp1	eukaryotic translation initiation factor 4E binding protein 1 [Source:MGI Symbol;Acc:MGI:103267]	1.76005	1.05051	50.1196	1.44653e-12	3.41771e-11
ENSMUSG00000032312	12988	Csk	c-src tyrosine kinase [Source:MGI Symbol;Acc:MGI:88537]	-1.71539	2.8805	50.0345	1.51067e-12	3.56326e-11
ENSMUSG00000026676	74186	Ccdc3	coiled-coil domain containing 3 [Source:MGI Symbol;Acc:MGI:1921436]	2.45696	0.465392	49.9824	1.55134e-12	3.65305e-11
ENSMUSG00000036766	227325	Dner	delta/notch-like EGF repeat containing [Source:MGI Symbol;Acc:MGI:2152889]	-1.52342	8.35267	49.9789	1.5541e-12	3.65344e-11
ENSMUSG00000098027	NA	Gm27004	predicted gene, 27004 [Source:MGI Symbol;Acc:MGI:5504119]	2.64072	0.570594	49.9263	1.59632e-12	3.74643e-11
ENSMUSG00000028838	56219	Extl1	exostoses (multiple)-like 1 [Source:MGI Symbol;Acc:MGI:1888742]	1.3778	5.80382	49.9093	1.61017e-12	3.77262e-11
ENSMUSG00000062488	667370	Ifit3b	interferon-induced protein with tetratricopeptide repeats 3B [Source:MGI Symbol;Acc:MGI:3698419]	-2.54789	2.16139	49.8822	1.63255e-12	3.8187e-11
ENSMUSG00000037946	30938	Fgd3	FYVE, RhoGEF and PH domain containing 3 [Source:MGI Symbol;Acc:MGI:1353657]	-2.44408	2.32065	49.8379	1.66988e-12	3.89954e-11
ENSMUSG00000074607	269389	Tox2	TOX high mobility group box family member 2 [Source:MGI Symbol;Acc:MGI:3611233]	-1.61419	4.14566	49.7455	1.75036e-12	4.08068e-11
ENSMUSG00000002324	56739	Rec8	REC8 meiotic recombination protein [Source:MGI Symbol;Acc:MGI:1929645]	-2.46869	0.819632	49.6749	1.81457e-12	4.22337e-11
ENSMUSG00000019975	67454	Ikbip	IKBKB interacting protein [Source:MGI Symbol;Acc:MGI:1914704]	-1.43318	3.64713	49.6345	1.85224e-12	4.30394e-11
ENSMUSG00000050623	67077	Catsperz	cation channel sperm associated auxiliary subunit zeta [Source:MGI Symbol;Acc:MGI:1914327]	1.62357	3.1278	49.5582	1.92577e-12	4.4674e-11
ENSMUSG00000042155	277396	Klhl23	kelch-like 23 [Source:MGI Symbol;Acc:MGI:2683536]	1.15294	6.61145	49.4945	1.98933e-12	4.60726e-11
ENSMUSG00000030220	11857	Arhgdib	Rho, GDP dissociation inhibitor (GDI) beta [Source:MGI Symbol;Acc:MGI:101940]	-1.925	5.22788	49.4782	2.00585e-12	4.63787e-11
ENSMUSG00000015247	66536	Nipsnap3b	nipsnap homolog 3B (C. elegans) [Source:MGI Symbol;Acc:MGI:1913786]	-1.16262	4.27353	49.4621	2.02239e-12	4.66844e-11
ENSMUSG00000034528	243168	Hsd17b13	hydroxysteroid (17-beta) dehydrogenase 13 [Source:MGI Symbol;Acc:MGI:2140804]	4.26306	0.331802	49.4487	2.03632e-12	4.69288e-11
ENSMUSG00000031216	236920	Stard8	START domain containing 8 [Source:MGI Symbol;Acc:MGI:2448556]	1.44726	4.37751	49.3586	2.13195e-12	4.90522e-11
ENSMUSG00000027398	16176	Il1b	interleukin 1 beta [Source:MGI Symbol;Acc:MGI:96543]	3.14039	0.565121	49.245	2.25905e-12	5.18916e-11
ENSMUSG00000096914	270049	Galntl6	UDP-N-acetyl-alpha-D-galactosamine:polypeptide N-acetylgalactosaminyltransferase-like 6 [Source:MGI Symbol;Acc:MGI:1913581]	-2.10282	3.58094	49.2359	2.26961e-12	5.20492e-11
ENSMUSG00000002660	53895	Clpp	caseinolytic mitochondrial matrix peptidase proteolytic subunit [Source:MGI Symbol;Acc:MGI:1858213]	-1.07105	6.59675	49.2156	2.29316e-12	5.25036e-11
ENSMUSG00000076612	NA	Ighg2c	immunoglobulin heavy constant gamma 2C [Source:MGI Symbol;Acc:MGI:2686979]	1.60995	2.19407	49.0429	2.50428e-12	5.72443e-11
ENSMUSG00000095139	18992	Pou3f2	POU domain, class 3, transcription factor 2 [Source:MGI Symbol;Acc:MGI:101895]	1.48441	5.6256	48.9954	2.56562e-12	5.85512e-11
ENSMUSG00000050272	13508	Dscam	DS cell adhesion molecule [Source:MGI Symbol;Acc:MGI:1196281]	1.26122	5.93711	48.9194	2.66702e-12	6.07284e-11
ENSMUSG00000020891	11688	Alox8	arachidonate 8-lipoxygenase [Source:MGI Symbol;Acc:MGI:1098228]	-2.58695	1.67871	48.9174	2.66966e-12	6.07284e-11
ENSMUSG00000038205	108097	Prkab2	protein kinase, AMP-activated, beta 2 non-catalytic subunit [Source:MGI Symbol;Acc:MGI:1336185]	1.20139	5.38442	48.9065	2.68462e-12	6.09699e-11
ENSMUSG00000023367	66058	Tmem176a	transmembrane protein 176A [Source:MGI Symbol;Acc:MGI:1913308]	-2.50109	4.24595	48.8525	2.75956e-12	6.25707e-11
ENSMUSG00000027188	210622	Pamr1	peptidase domain containing associated with muscle regeneration 1 [Source:MGI Symbol;Acc:MGI:2445082]	2.46092	5.73869	48.8469	2.76743e-12	6.2607e-11
ENSMUSG00000097924	NA	A730020E08Rik	RIKEN cDNA A730020E08 gene [Source:MGI Symbol;Acc:MGI:2444999]	-1.35776	1.53109	48.845	2.77007e-12	6.2607e-11
ENSMUSG00000036356	234356	Csgalnact1	chondroitin sulfate N-acetylgalactosaminyltransferase 1 [Source:MGI Symbol;Acc:MGI:2442354]	1.46587	4.43482	48.8336	2.78632e-12	6.28733e-11
ENSMUSG00000057229	66349	Atp5sl	ATP5S-like [Source:MGI Symbol;Acc:MGI:1913599]	-1.0184	5.33694	48.8156	2.81198e-12	6.33506e-11
ENSMUSG00000056145	NA	AI504432	expressed sequence AI504432 [Source:MGI Symbol;Acc:MGI:2139742]	-1.42442	4.27962	48.8022	2.83126e-12	6.3683e-11
ENSMUSG00000041889	77552	Shisa4	shisa family member 4 [Source:MGI Symbol;Acc:MGI:1924802]	1.7618	7.16431	48.7907	2.84785e-12	6.39537e-11
ENSMUSG00000008393	52502	Carhsp1	calcium regulated heat stable protein 1 [Source:MGI Symbol;Acc:MGI:1196368]	-2.55749	5.405	48.6754	3.02033e-12	6.77189e-11
ENSMUSG00000028813	635169	CK137956	cDNA sequence CK137956 [Source:MGI Symbol;Acc:MGI:3616080]	1.9479	1.26307	48.5422	3.23255e-12	7.23617e-11
ENSMUSG00000005973	19672	Rcn1	reticulocalbin 1 [Source:MGI Symbol;Acc:MGI:104559]	-1.64706	4.50416	48.4783	3.33963e-12	7.464e-11
ENSMUSG00000019929	13179	Dcn	decorin [Source:MGI Symbol;Acc:MGI:94872]	3.9003	5.78164	48.3889	3.49546e-12	7.79987e-11
ENSMUSG00000022097	20389	Sftpc	surfactant associated protein C [Source:MGI Symbol;Acc:MGI:109517]	1.79225	1.88544	48.3741	3.52183e-12	7.84625e-11
ENSMUSG00000025889	20617	Snca	synuclein, alpha [Source:MGI Symbol;Acc:MGI:1277151]	1.71877	9.59504	48.3672	3.53425e-12	7.86147e-11
ENSMUSG00000023829	20517	Slc22a1	solute carrier family 22 (organic cation transporter), member 1 [Source:MGI Symbol;Acc:MGI:108111]	2.88011	0.76529	48.2271	3.79615e-12	8.43069e-11
ENSMUSG00000046593	320500	Tmem215	transmembrane protein 215 [Source:MGI Symbol;Acc:MGI:2444167]	1.73865	4.87629	48.111	4.02755e-12	8.9305e-11
ENSMUSG00000076441	11898	Ass1	argininosuccinate synthetase 1 [Source:MGI Symbol;Acc:MGI:88090]	-1.92392	2.71633	48.0405	4.17509e-12	9.24306e-11
ENSMUSG00000073154	NA	9330158H04Rik	RIKEN cDNA 9330158H04 gene [Source:MGI Symbol;Acc:MGI:2442094]	-1.7944	1.20786	47.904	4.47604e-12	9.89374e-11
ENSMUSG00000039419	66797	Cntnap2	contactin associated protein-like 2 [Source:MGI Symbol;Acc:MGI:1914047]	-1.12524	6.76701	47.8941	4.49885e-12	9.92854e-11
ENSMUSG00000050010	330096	Shisa3	shisa family member 3 [Source:MGI Symbol;Acc:MGI:3041225]	2.61786	0.928869	47.8164	4.68054e-12	1.03133e-10
ENSMUSG00000021010	27386	Npas3	neuronal PAS domain protein 3 [Source:MGI Symbol;Acc:MGI:1351610]	-2.40176	5.29462	47.7887	4.74728e-12	1.0444e-10
ENSMUSG00000000486	54204	2018-09-01	septin 1 [Source:MGI Symbol;Acc:MGI:1858916]	-2.13377	0.0614425	47.7835	4.75974e-12	1.04551e-10
ENSMUSG00000022237	67434	Ankrd33b	ankyrin repeat domain 33B [Source:MGI Symbol;Acc:MGI:1917904]	1.06389	4.89486	47.7754	4.77958e-12	1.04823e-10
ENSMUSG00000099907	NA	Gm10421	predicted gene 10421 [Source:MGI Symbol;Acc:MGI:3642601]	-2.5271	0.881292	47.7285	4.89519e-12	1.07191e-10
ENSMUSG00000034898	70598	Filip1	filamin A interacting protein 1 [Source:MGI Symbol;Acc:MGI:1917848]	-2.15276	2.84277	47.7075	4.94789e-12	1.08176e-10
ENSMUSG00000086732	NA	Gm6117	predicted gene 6117 [Source:MGI Symbol;Acc:MGI:3647032]	2.12515	0.562904	47.6306	5.14586e-12	1.1233e-10
ENSMUSG00000062352	16413	Itgb1bp1	integrin beta 1 binding protein 1 [Source:MGI Symbol;Acc:MGI:1306802]	-1.1614	4.66653	47.5785	5.28462e-12	1.1518e-10
ENSMUSG00000000317	12029	Bcl6b	B cell CLL/lymphoma 6, member B [Source:MGI Symbol;Acc:MGI:1278332]	2.10299	1.063	47.5085	5.47667e-12	1.19177e-10
ENSMUSG00000050896	269295	Rtn4rl2	reticulon 4 receptor-like 2 [Source:MGI Symbol;Acc:MGI:2669796]	2.98389	-0.402658	47.5055	5.48494e-12	1.19177e-10
ENSMUSG00000033615	12889	Cplx1	complexin 1 [Source:MGI Symbol;Acc:MGI:104727]	-1.33171	8.93301	47.3399	5.96859e-12	1.29485e-10
ENSMUSG00000034761	399510	Map4k5	mitogen-activated protein kinase kinase kinase kinase 5 [Source:MGI Symbol;Acc:MGI:1925503]	1.08868	4.6898	47.2793	6.15599e-12	1.33345e-10
ENSMUSG00000037058	67869	Paip2	polyadenylate-binding protein-interacting protein 2 [Source:MGI Symbol;Acc:MGI:1915119]	-1.09214	8.05812	47.1554	6.5576e-12	1.41826e-10
ENSMUSG00000046321	195646	Hs3st2	heparan sulfate (glucosamine) 3-O-sulfotransferase 2 [Source:MGI Symbol;Acc:MGI:1333802]	1.72922	5.74681	47.1435	6.59744e-12	1.42452e-10
ENSMUSG00000020919	20851	Stat5b	signal transducer and activator of transcription 5B [Source:MGI Symbol;Acc:MGI:103035]	-1.54256	2.59141	47.1407	6.60681e-12	1.42452e-10
ENSMUSG00000033849	26878	B3galt2	UDP-Gal:betaGlcNAc beta 1,3-galactosyltransferase, polypeptide 2 [Source:MGI Symbol;Acc:MGI:1349461]	1.73321	6.51437	47.1164	6.68923e-12	1.44008e-10
ENSMUSG00000021226	171210	Acot2	acyl-CoA thioesterase 2 [Source:MGI Symbol;Acc:MGI:2159605]	2.2385	5.38266	46.8917	7.50198e-12	1.61258e-10
ENSMUSG00000021253	21809	Tgfb3	transforming growth factor, beta 3 [Source:MGI Symbol;Acc:MGI:98727]	-1.57069	3.47314	46.7981	7.86898e-12	1.68889e-10
ENSMUSG00000062373	74868	Tmem65	transmembrane protein 65 [Source:MGI Symbol;Acc:MGI:1922118]	-1.22547	6.92087	46.7645	8.00504e-12	1.71547e-10
ENSMUSG00000026604	19250	Ptpn14	protein tyrosine phosphatase, non-receptor type 14 [Source:MGI Symbol;Acc:MGI:102467]	1.98031	2.46789	46.716	8.2055e-12	1.75575e-10
ENSMUSG00000017400	217154	Stac2	SH3 and cysteine rich domain 2 [Source:MGI Symbol;Acc:MGI:2144518]	-1.42402	5.09841	46.7094	8.23315e-12	1.75899e-10
ENSMUSG00000030047	232201	Arhgap25	Rho GTPase activating protein 25 [Source:MGI Symbol;Acc:MGI:2443687]	1.61272	3.39623	46.6858	8.33312e-12	1.77765e-10
ENSMUSG00000097049	NA	6530411M01Rik	RIKEN cDNA 6530411M01 gene [Source:MGI Symbol;Acc:MGI:1915041]	-2.30164	0.0306375	46.6625	8.43258e-12	1.79614e-10
ENSMUSG00000019828	14816	Grm1	glutamate receptor, metabotropic 1 [Source:MGI Symbol;Acc:MGI:1351338]	-1.49106	5.56665	46.5477	8.94148e-12	1.90165e-10
ENSMUSG00000050002	75731	Idnk	idnK gluconokinase homolog (E. coli) [Source:MGI Symbol;Acc:MGI:1922981]	-1.53184	4.95512	46.4778	9.26635e-12	1.96777e-10
ENSMUSG00000059149	213006	Mfsd4a	major facilitator superfamily domain containing 4A [Source:MGI Symbol;Acc:MGI:2442786]	1.21151	6.60601	46.4184	9.55132e-12	2.02523e-10
ENSMUSG00000058624	14544	Gda	guanine deaminase [Source:MGI Symbol;Acc:MGI:95678]	1.43255	7.2145	46.4	9.64162e-12	2.04129e-10
ENSMUSG00000071648	19881	Rom1	rod outer segment membrane protein 1 [Source:MGI Symbol;Acc:MGI:97998]	-2.94023	1.69011	46.3606	9.83736e-12	2.0796e-10
ENSMUSG00000021835	12159	Bmp4	bone morphogenetic protein 4 [Source:MGI Symbol;Acc:MGI:88180]	-1.98453	2.25359	46.1935	1.07132e-11	2.26135e-10
ENSMUSG00000022353	211401	Mtss1	metastasis suppressor 1 [Source:MGI Symbol;Acc:MGI:2384818]	-1.28827	4.54881	46.1685	1.0851e-11	2.28701e-10
ENSMUSG00000028545	67621	Bend5	BEN domain containing 5 [Source:MGI Symbol;Acc:MGI:1914871]	1.9183	3.38565	46.1179	1.11347e-11	2.34151e-10
ENSMUSG00000089661	12587	Mia	melanoma inhibitory activity [Source:MGI Symbol;Acc:MGI:109615]	-4.26617	-1.07986	46.1165	1.11429e-11	2.34151e-10
ENSMUSG00000021675	14064	F2rl2	coagulation factor II (thrombin) receptor-like 2 [Source:MGI Symbol;Acc:MGI:1298208]	2.87944	1.59551	46.0421	1.15742e-11	2.4285e-10
ENSMUSG00000058523	17844	Mup5	major urinary protein 5 [Source:MGI Symbol;Acc:MGI:104974]	4.29015	0.0213315	46.0318	1.16347e-11	2.43756e-10
ENSMUSG00000009376	17295	Met	met proto-oncogene [Source:MGI Symbol;Acc:MGI:96969]	2.01274	4.25617	45.8079	1.30436e-11	2.72868e-10
ENSMUSG00000025582	18164	Nptx1	neuronal pentraxin 1 [Source:MGI Symbol;Acc:MGI:107811]	1.63274	7.13746	45.7804	1.32281e-11	2.76316e-10
ENSMUSG00000051515	NA	Fam181b	family with sequence similarity 181, member B [Source:MGI Symbol;Acc:MGI:1930951]	-2.5106	2.7615	45.7086	1.37221e-11	2.86211e-10
ENSMUSG00000030357	14228	Fkbp4	FK506 binding protein 4 [Source:MGI Symbol;Acc:MGI:95543]	-0.890377	6.79453	45.6509	1.41318e-11	2.94319e-10
ENSMUSG00000030323	81896	Ift122	intraflagellar transport 122 [Source:MGI Symbol;Acc:MGI:1932386]	1.07805	4.80269	45.5677	1.4745e-11	3.06636e-10
ENSMUSG00000049436	22268	Upk1b	uroplakin 1B [Source:MGI Symbol;Acc:MGI:98912]	2.37591	0.887754	45.5384	1.49675e-11	3.10801e-10
ENSMUSG00000007039	51793	Ddah2	dimethylarginine dimethylaminohydrolase 2 [Source:MGI Symbol;Acc:MGI:1859016]	-2.13744	2.58536	45.5331	1.50084e-11	3.11193e-10
ENSMUSG00000033287	72844	Kctd17	potassium channel tetramerisation domain containing 17 [Source:MGI Symbol;Acc:MGI:1920094]	-1.06472	4.34873	45.5191	1.5116e-11	3.12962e-10
ENSMUSG00000019960	67603	Dusp6	dual specificity phosphatase 6 [Source:MGI Symbol;Acc:MGI:1914853]	1.58093	6.19999	45.4946	1.53061e-11	3.16432e-10
ENSMUSG00000020614	208659	Fam20a	family with sequence similarity 20, member A [Source:MGI Symbol;Acc:MGI:2388266]	1.62048	3.55003	45.4832	1.53952e-11	3.17806e-10
ENSMUSG00000032352	214345	Lrrc1	leucine rich repeat containing 1 [Source:MGI Symbol;Acc:MGI:2442313]	-1.81822	2.28228	45.48	1.54206e-11	3.17863e-10
ENSMUSG00000022641	70508	Bbx	bobby sox HMG box containing [Source:MGI Symbol;Acc:MGI:1917758]	-1.2173	5.23451	45.4573	1.56006e-11	3.21103e-10
ENSMUSG00000059108	213002	Ifitm6	interferon induced transmembrane protein 6 [Source:MGI Symbol;Acc:MGI:2686976]	2.95303	-0.543927	45.3466	1.65071e-11	3.39264e-10
ENSMUSG00000032807	11686	Alox12b	arachidonate 12-lipoxygenase, 12R type [Source:MGI Symbol;Acc:MGI:1274782]	3.25778	2.25828	45.3097	1.68217e-11	3.45226e-10
ENSMUSG00000003657	12308	Calb2	calbindin 2 [Source:MGI Symbol;Acc:MGI:101914]	-2.08246	5.23833	45.2942	1.69548e-11	3.47451e-10
ENSMUSG00000036225	106931	Kctd1	potassium channel tetramerisation domain containing 1 [Source:MGI Symbol;Acc:MGI:1918269]	-0.966638	5.79304	45.2843	1.70413e-11	3.48715e-10
ENSMUSG00000020834	70451	Dhrs13	dehydrogenase/reductase (SDR family) member 13 [Source:MGI Symbol;Acc:MGI:1917701]	-1.52328	2.84097	45.1936	1.7849e-11	3.6471e-10
ENSMUSG00000097929	NA	Tunar	Tcl1 upstream neural differentiation associated RNA [Source:MGI Symbol;Acc:MGI:1917202]	-1.56835	3.07639	45.1461	1.82868e-11	3.73113e-10
ENSMUSG00000053399	208936	Adamts18	a disintegrin-like and metallopeptidase (reprolysin type) with thrombospondin type 1 motif, 18 [Source:MGI Symbol;Acc:MGI:2442600]	2.28729	1.89518	45.1431	1.8315e-11	3.73147e-10
ENSMUSG00000023169	105727	Slc38a1	solute carrier family 38, member 1 [Source:MGI Symbol;Acc:MGI:2145895]	-1.35706	7.78607	45.1341	1.83992e-11	3.74322e-10
ENSMUSG00000023150	117198	Ivns1abp	influenza virus NS1A binding protein [Source:MGI Symbol;Acc:MGI:2152389]	-0.845339	7.11617	45.1075	1.8651e-11	3.78895e-10
ENSMUSG00000048899	194237	Rimkla	ribosomal modification protein rimK-like family member A [Source:MGI Symbol;Acc:MGI:3040686]	-1.47919	3.36277	45.0757	1.89558e-11	3.84533e-10
ENSMUSG00000030870	28018	Ubfd1	ubiquitin family domain containing 1 [Source:MGI Symbol;Acc:MGI:107301]	-1.05062	6.44069	45.0641	1.90691e-11	3.86272e-10
ENSMUSG00000021868	105675	Ppif	peptidylprolyl isomerase F (cyclophilin F) [Source:MGI Symbol;Acc:MGI:2145814]	-1.34512	4.99739	45.0456	1.92498e-11	3.89372e-10
ENSMUSG00000020447	237636	Npc1l1	NPC1-like 1 [Source:MGI Symbol;Acc:MGI:2685089]	2.54787	2.12137	45.025	1.94538e-11	3.92933e-10
ENSMUSG00000030137	53857	Tuba8	tubulin, alpha 8 [Source:MGI Symbol;Acc:MGI:1858225]	-1.90986	3.59625	44.9888	1.98161e-11	3.99677e-10
ENSMUSG00000040265	103967	Dnm3	dynamin 3 [Source:MGI Symbol;Acc:MGI:1341299]	-1.22295	6.94456	44.9045	2.06883e-11	4.16671e-10
ENSMUSG00000091243	73569	Vgll3	vestigial like family member 3 [Source:MGI Symbol;Acc:MGI:1920819]	2.34002	0.918575	44.8788	2.0962e-11	4.2158e-10
ENSMUSG00000027359	26458	Slc27a2	solute carrier family 27 (fatty acid transporter), member 2 [Source:MGI Symbol;Acc:MGI:1347099]	-2.14371	2.83944	44.8727	2.10273e-11	4.22288e-10
ENSMUSG00000030774	18479	Pak1	p21 protein (Cdc42/Rac)-activated kinase 1 [Source:MGI Symbol;Acc:MGI:1339975]	1.21426	9.08779	44.8601	2.1163e-11	4.24407e-10
ENSMUSG00000066760	26436	Psg16	pregnancy specific glycoprotein 16 [Source:MGI Symbol;Acc:MGI:1347249]	2.13421	1.91597	44.8022	2.17976e-11	4.36511e-10
ENSMUSG00000032224	76886	Fam81a	family with sequence similarity 81, member A [Source:MGI Symbol;Acc:MGI:1924136]	1.66427	8.5392	44.7405	2.24959e-11	4.49854e-10
ENSMUSG00000051354	268288	Samd3	sterile alpha motif domain containing 3 [Source:MGI Symbol;Acc:MGI:2685469]	2.90092	0.800554	44.6503	2.35556e-11	4.70376e-10
ENSMUSG00000032085	21345	Tagln	transgelin [Source:MGI Symbol;Acc:MGI:106012]	-3.19885	2.42882	44.6471	2.35942e-11	4.70478e-10
ENSMUSG00000035158	17342	Mitf	microphthalmia-associated transcription factor [Source:MGI Symbol;Acc:MGI:104554]	-1.43536	2.49561	44.6359	2.37301e-11	4.72518e-10
ENSMUSG00000019803	21907	Nr2e1	nuclear receptor subfamily 2, group E, member 1 [Source:MGI Symbol;Acc:MGI:1100526]	-2.69138	3.62476	44.6327	2.37683e-11	4.72582e-10
ENSMUSG00000050195	329065	Scd4	stearoyl-coenzyme A desaturase 4 [Source:MGI Symbol;Acc:MGI:2670997]	5.02884	-0.440856	44.6301	2.38006e-11	4.72582e-10
ENSMUSG00000057766	225187	Ankrd29	ankyrin repeat domain 29 [Source:MGI Symbol;Acc:MGI:2687055]	-1.654	5.59854	44.6033	2.41285e-11	4.78418e-10
ENSMUSG00000042671	67792	Rgs8	regulator of G-protein signaling 8 [Source:MGI Symbol;Acc:MGI:108408]	-1.46893	5.07931	44.6004	2.41642e-11	4.78452e-10
ENSMUSG00000053297	NA	AI854703	expressed sequence AI854703 [Source:MGI Symbol;Acc:MGI:2141510]	-1.01606	4.89999	44.4439	2.61752e-11	5.17539e-10
ENSMUSG00000001833	235072	2018-09-07	septin 7 [Source:MGI Symbol;Acc:MGI:1335094]	0.961403	9.47635	44.4064	2.6681e-11	5.26799e-10
ENSMUSG00000009569	239719	Mkl2	MKL/myocardin-like 2 [Source:MGI Symbol;Acc:MGI:3050795]	1.31965	8.07762	44.3378	2.76326e-11	5.44824e-10
ENSMUSG00000031093	75974	Dock11	dedicator of cytokinesis 11 [Source:MGI Symbol;Acc:MGI:1923224]	-1.96422	3.42722	44.3037	2.81191e-11	5.5319e-10
ENSMUSG00000049493	102502	Pls1	plastin 1 (I-isoform) [Source:MGI Symbol;Acc:MGI:104809]	1.59719	3.73162	44.3025	2.81357e-11	5.5319e-10
ENSMUSG00000002731	23992	Prkra	protein kinase, interferon inducible double stranded RNA dependent activator [Source:MGI Symbol;Acc:MGI:1344375]	-1.2817	4.04767	44.2711	2.85901e-11	5.61339e-10
ENSMUSG00000005583	17260	Mef2c	myocyte enhancer factor 2C [Source:MGI Symbol;Acc:MGI:99458]	1.13336	10.1382	44.214	2.94375e-11	5.77172e-10
ENSMUSG00000052298	72729	Cdc42se2	CDC42 small effector 2 [Source:MGI Symbol;Acc:MGI:1919979]	0.818603	7.91175	44.096	3.12661e-11	6.1217e-10
ENSMUSG00000065979	223978	Cpped1	calcineurin-like phosphoesterase domain containing 1 [Source:MGI Symbol;Acc:MGI:2443300]	0.943855	5.73921	44.0885	3.13855e-11	6.13653e-10
ENSMUSG00000012705	57264	Retn	resistin [Source:MGI Symbol;Acc:MGI:1888506]	-1.97047	0.453232	44.076	3.15871e-11	6.16739e-10
ENSMUSG00000014852	279028	Adamts13	a disintegrin-like and metallopeptidase (reprolysin type) with thrombospondin type 1 motif, 13 [Source:MGI Symbol;Acc:MGI:2685556]	1.55782	1.92666	44.0596	3.18535e-11	6.21078e-10
ENSMUSG00000064010	347708	Dppa1	developmental pluripotency associated 1 [Source:MGI Symbol;Acc:MGI:2157522]	5.41733	-0.143094	44.0565	3.19035e-11	6.21191e-10
ENSMUSG00000000378	216527	Ccm2	cerebral cavernous malformation 2 [Source:MGI Symbol;Acc:MGI:2384924]	-0.886228	4.64252	44.003	3.27869e-11	6.37508e-10
ENSMUSG00000054871	72309	Tmem158	transmembrane protein 158 [Source:MGI Symbol;Acc:MGI:1919559]	-1.64297	3.97151	43.934	3.39637e-11	6.59477e-10
ENSMUSG00000022864	67102	D16Ertd472e	DNA segment, Chr 16, ERATO Doi 472, expressed [Source:MGI Symbol;Acc:MGI:1196400]	2.0366	2.34708	43.8997	3.4564e-11	6.70102e-10
ENSMUSG00000029875	239650	Ccdc184	coiled-coil domain containing 184 [Source:MGI Symbol;Acc:MGI:2146066]	-1.75034	4.12	43.8968	3.46154e-11	6.70102e-10
ENSMUSG00000081096	NA	Gm12691	predicted gene 12691 [Source:MGI Symbol;Acc:MGI:3650220]	2.47674	0.437331	43.8946	3.46539e-11	6.70102e-10
ENSMUSG00000023805	20975	Synj2	synaptojanin 2 [Source:MGI Symbol;Acc:MGI:1201671]	1.15712	4.74792	43.881	3.48964e-11	6.73865e-10
ENSMUSG00000071369	26408	Map3k5	mitogen-activated protein kinase kinase kinase 5 [Source:MGI Symbol;Acc:MGI:1346876]	0.963112	5.02873	43.7994	3.63818e-11	7.01035e-10
ENSMUSG00000040205	16433	Cuzd1	CUB and zona pellucida-like domains 1 [Source:MGI Symbol;Acc:MGI:1202881]	3.23764	0.0293322	43.7982	3.64031e-11	7.01035e-10
ENSMUSG00000041930	433940	Fam222a	family with sequence similarity 222, member A [Source:MGI Symbol;Acc:MGI:3605543]	-1.76984	0.578447	43.7907	3.65432e-11	7.0277e-10
ENSMUSG00000015396	12522	Cd83	CD83 antigen [Source:MGI Symbol;Acc:MGI:1328316]	1.60685	3.99674	43.6816	3.86383e-11	7.42045e-10
ENSMUSG00000068747	20661	Sort1	sortilin 1 [Source:MGI Symbol;Acc:MGI:1338015]	1.20081	8.69301	43.6319	3.96322e-11	7.60095e-10
ENSMUSG00000087141	433022	Plcxd2	phosphatidylinositol-specific phospholipase C, X domain containing 2 [Source:MGI Symbol;Acc:MGI:3647874]	1.26699	7.03568	43.5418	4.15005e-11	7.94842e-10
ENSMUSG00000036598	244608	Ccdc113	coiled-coil domain containing 113 [Source:MGI Symbol;Acc:MGI:3606076]	1.39893	1.1723	43.4866	4.26863e-11	8.16441e-10
ENSMUSG00000042436	76293	Mfap4	microfibrillar-associated protein 4 [Source:MGI Symbol;Acc:MGI:1342276]	3.02825	2.26232	43.4482	4.35326e-11	8.31496e-10
ENSMUSG00000026950	17996	Neb	nebulin [Source:MGI Symbol;Acc:MGI:97292]	2.28033	1.9896	43.4419	4.36733e-11	8.33052e-10
ENSMUSG00000097684	NA	Gm26645	predicted gene, 26645 [Source:MGI Symbol;Acc:MGI:5477139]	-3.41946	1.92747	43.4285	4.39728e-11	8.37629e-10
ENSMUSG00000036712	74256	Cyld	CYLD lysine 63 deubiquitinase [Source:MGI Symbol;Acc:MGI:1921506]	-0.898994	6.08167	43.3344	4.61397e-11	8.77715e-10
ENSMUSG00000033295	19268	Ptprf	protein tyrosine phosphatase, receptor type, F [Source:MGI Symbol;Acc:MGI:102695]	1.17904	5.96699	43.2341	4.85658e-11	9.22618e-10
ENSMUSG00000058420	110058	Syt17	synaptotagmin XVII [Source:MGI Symbol;Acc:MGI:104966]	1.93759	4.39155	43.1661	5.02851e-11	9.53992e-10
ENSMUSG00000020085	71361	Aifm2	apoptosis-inducing factor, mitochondrion-associated 2 [Source:MGI Symbol;Acc:MGI:1918611]	-1.62932	2.32025	43.1622	5.03843e-11	9.54585e-10
ENSMUSG00000027004	20378	Frzb	frizzled-related protein [Source:MGI Symbol;Acc:MGI:892032]	1.53626	5.06948	43.1317	5.11758e-11	9.68276e-10
ENSMUSG00000048534	270152	Jaml	junction adhesion molecule like [Source:MGI Symbol;Acc:MGI:2685484]	3.88514	0.31547	43.1279	5.12768e-11	9.68884e-10
ENSMUSG00000039043	70420	Arpin	actin-related protein 2/3 complex inhibitor [Source:MGI Symbol;Acc:MGI:1917670]	-1.2519	3.21505	43.0585	5.31264e-11	1.00248e-09
ENSMUSG00000056296	72003	Synpr	synaptoporin [Source:MGI Symbol;Acc:MGI:1919253]	-1.68999	7.84737	43.0469	5.34427e-11	1.0071e-09
ENSMUSG00000060257	545474	Scrt2	scratch family zinc finger 2 [Source:MGI Symbol;Acc:MGI:2139287]	-1.42384	1.62412	43.0439	5.3524e-11	1.00728e-09
ENSMUSG00000026315	20725	Serpinb8	serine (or cysteine) peptidase inhibitor, clade B, member 8 [Source:MGI Symbol;Acc:MGI:894657]	2.4668	3.23985	43.0036	5.46406e-11	1.02692e-09
ENSMUSG00000000753	20317	Serpinf1	serine (or cysteine) peptidase inhibitor, clade F, member 1 [Source:MGI Symbol;Acc:MGI:108080]	-2.21372	2.80175	42.981	5.52733e-11	1.03743e-09
ENSMUSG00000031104	19337	Rab33a	RAB33A, member RAS oncogene family [Source:MGI Symbol;Acc:MGI:109493]	1.17229	5.67959	42.8807	5.81808e-11	1.09054e-09
ENSMUSG00000050370	12642	Ch25h	cholesterol 25-hydroxylase [Source:MGI Symbol;Acc:MGI:1333869]	-4.35675	-0.710649	42.7717	6.15151e-11	1.1515e-09
ENSMUSG00000037104	56468	Socs5	suppressor of cytokine signaling 5 [Source:MGI Symbol;Acc:MGI:2385459]	-1.16389	6.02329	42.7568	6.19866e-11	1.15811e-09
ENSMUSG00000025810	18186	Nrp1	neuropilin 1 [Source:MGI Symbol;Acc:MGI:106206]	1.69421	6.23578	42.7553	6.20327e-11	1.15811e-09
ENSMUSG00000049916	70458	2610318N02Rik	RIKEN cDNA 2610318N02 gene [Source:MGI Symbol;Acc:MGI:1917708]	-2.38782	-0.336195	42.7491	6.22294e-11	1.16024e-09
ENSMUSG00000052014	381673	A330070K13Rik	RIKEN cDNA A330070K13 gene [Source:MGI Symbol;Acc:MGI:2685897]	-1.97044	0.955614	42.6962	6.39377e-11	1.19051e-09
ENSMUSG00000024642	21888	Tle4	transducin-like enhancer of split 4 [Source:MGI Symbol;Acc:MGI:104633]	-0.996048	5.65784	42.6152	6.66388e-11	1.23916e-09
ENSMUSG00000025789	20450	St8sia2	ST8 alpha-N-acetyl-neuraminide alpha-2,8-sialyltransferase 2 [Source:MGI Symbol;Acc:MGI:106020]	-1.92401	2.5955	42.5813	6.7806e-11	1.2592e-09
ENSMUSG00000037653	243043	Kctd8	potassium channel tetramerisation domain containing 8 [Source:MGI Symbol;Acc:MGI:2443804]	-1.65495	3.44694	42.5217	6.99037e-11	1.29645e-09
ENSMUSG00000030088	107747	Aldh1l1	aldehyde dehydrogenase 1 family, member L1 [Source:MGI Symbol;Acc:MGI:1340024]	2.4009	6.28921	42.5081	7.03901e-11	1.30375e-09
ENSMUSG00000001508	20391	Sgca	sarcoglycan, alpha (dystrophin-associated glycoprotein) [Source:MGI Symbol;Acc:MGI:894698]	-3.45918	0.170972	42.375	7.5348e-11	1.39374e-09
ENSMUSG00000038244	320878	Mical2	microtubule associated monooxygenase, calponin and LIM domain containing 2 [Source:MGI Symbol;Acc:MGI:2444947]	1.213	7.43599	42.2162	8.17185e-11	1.50959e-09
ENSMUSG00000025163	12516	Cd7	CD7 antigen [Source:MGI Symbol;Acc:MGI:88344]	3.08956	1.51463	42.2131	8.18509e-11	1.51005e-09
ENSMUSG00000037185	74127	Krt80	keratin 80 [Source:MGI Symbol;Acc:MGI:1921377]	3.09779	0.401428	42.2078	8.20713e-11	1.51213e-09
ENSMUSG00000027864	19221	Ptgfrn	prostaglandin F2 receptor negative regulator [Source:MGI Symbol;Acc:MGI:1277114]	1.47538	4.70928	42.1695	8.3695e-11	1.54003e-09
ENSMUSG00000033316	231605	Galnt9	UDP-N-acetyl-alpha-D-galactosamine:polypeptide N-acetylgalactosaminyltransferase 9 [Source:MGI Symbol;Acc:MGI:2677965]	1.60739	6.67734	42.119	8.58869e-11	1.5783e-09
ENSMUSG00000038775	22351	Vill	villin-like [Source:MGI Symbol;Acc:MGI:1201781]	2.29805	0.833459	42.1069	8.64184e-11	1.58599e-09
ENSMUSG00000097452	NA	Gm2824	predicted gene 2824 [Source:MGI Symbol;Acc:MGI:3780995]	1.77707	2.09225	42.091	8.71212e-11	1.59571e-09
ENSMUSG00000037752	381560	Xkr8	X-linked Kx blood group related 8 [Source:MGI Symbol;Acc:MGI:2685877]	-2.14225	1.75264	42.0898	8.71748e-11	1.59571e-09
ENSMUSG00000041809	71877	Efhc1	EF-hand domain (C-terminal) containing 1 [Source:MGI Symbol;Acc:MGI:1919127]	1.8146	0.749212	42.0686	8.81261e-11	1.61102e-09
ENSMUSG00000026235	13838	Epha4	Eph receptor A4 [Source:MGI Symbol;Acc:MGI:98277]	1.32969	8.78831	42.0226	9.02233e-11	1.64722e-09
ENSMUSG00000030340	20276	Scnn1a	sodium channel, nonvoltage-gated 1 alpha [Source:MGI Symbol;Acc:MGI:101782]	1.81491	2.00271	41.9613	9.30975e-11	1.69698e-09
ENSMUSG00000038239	15464	Hrc	histidine rich calcium binding protein [Source:MGI Symbol;Acc:MGI:96226]	-2.99149	-0.324251	41.9594	9.31905e-11	1.69698e-09
ENSMUSG00000032015	18988	Pou2f3	POU domain, class 2, transcription factor 3 [Source:MGI Symbol;Acc:MGI:102565]	3.10503	-0.670204	41.9313	9.4539e-11	1.71931e-09
ENSMUSG00000027009	16401	Itga4	integrin alpha 4 [Source:MGI Symbol;Acc:MGI:96603]	2.09044	3.06017	41.7726	1.02528e-10	1.8622e-09
ENSMUSG00000022025	16840	Cnmd	chondromodulin [Source:MGI Symbol;Acc:MGI:1341171]	-2.69035	1.88154	41.7354	1.04499e-10	1.89554e-09
ENSMUSG00000061887	72475	Ssbp3	single-stranded DNA binding protein 3 [Source:MGI Symbol;Acc:MGI:1919725]	1.01093	7.44112	41.7324	1.04659e-10	1.896e-09
ENSMUSG00000046275	237858	Tusc5	tumor suppressor candidate 5 [Source:MGI Symbol;Acc:MGI:3029307]	-2.2971	1.35523	41.6053	1.11692e-10	2.02081e-09
ENSMUSG00000034574	208846	Daam1	dishevelled associated activator of morphogenesis 1 [Source:MGI Symbol;Acc:MGI:1914596]	-1.166	5.05506	41.572	1.13609e-10	2.05285e-09
ENSMUSG00000035891	223753	Cerk	ceramide kinase [Source:MGI Symbol;Acc:MGI:2386052]	-1.32067	4.78016	41.4992	1.17917e-10	2.12795e-09
ENSMUSG00000026475	19734	Rgs16	regulator of G-protein signaling 16 [Source:MGI Symbol;Acc:MGI:108407]	-2.24083	0.874457	41.4925	1.18322e-10	2.13252e-09
ENSMUSG00000078117	NA	Gm16485	predicted gene 16485 [Source:MGI Symbol;Acc:MGI:3642771]	1.2873	3.29054	41.458	1.20432e-10	2.16777e-09
ENSMUSG00000001911	18032	Nfix	nuclear factor I/X [Source:MGI Symbol;Acc:MGI:97311]	1.22852	7.27828	41.4067	1.23635e-10	2.22258e-09
ENSMUSG00000100851	NA	Gm28928	predicted gene 28928 [Source:MGI Symbol;Acc:MGI:5579634]	2.84162	1.30759	41.3868	1.24898e-10	2.24243e-09
ENSMUSG00000019831	83767	Wasf1	WAS protein family, member 1 [Source:MGI Symbol;Acc:MGI:1890563]	1.13268	8.53113	41.3832	1.25127e-10	2.24366e-09
ENSMUSG00000050064	242109	Zfp697	zinc finger protein 697 [Source:MGI Symbol;Acc:MGI:2139736]	1.22534	4.09357	41.3176	1.29396e-10	2.31727e-09
ENSMUSG00000035275	242570	Raver2	ribonucleoprotein, PTB-binding 2 [Source:MGI Symbol;Acc:MGI:2443623]	1.64768	3.80717	41.2524	1.33786e-10	2.39284e-09
ENSMUSG00000033063	238680	Cntnap3	contactin associated protein-like 3 [Source:MGI Symbol;Acc:MGI:3588199]	-2.89083	2.39018	41.1348	1.42081e-10	2.53796e-09
ENSMUSG00000018841	19364	Rad51d	RAD51 paralog D [Source:MGI Symbol;Acc:MGI:1261809]	-0.861018	3.72219	41.1316	1.42314e-10	2.53889e-09
ENSMUSG00000026167	22409	Wnt10a	wingless-type MMTV integration site family, member 10A [Source:MGI Symbol;Acc:MGI:108071]	2.006	1.29015	41.0948	1.45021e-10	2.5839e-09
ENSMUSG00000036192	225998	Rorb	RAR-related orphan receptor beta [Source:MGI Symbol;Acc:MGI:1343464]	2.39455	7.02078	41.0368	1.4939e-10	2.65839e-09
ENSMUSG00000051456	56534	Hspb3	heat shock protein 3 [Source:MGI Symbol;Acc:MGI:1928479]	1.84937	2.19351	41.033	1.49681e-10	2.66019e-09
ENSMUSG00000013367	210094	Iglon5	IgLON family member 5 [Source:MGI Symbol;Acc:MGI:2686277]	-1.50453	1.81272	41.0268	1.50159e-10	2.66369e-09
ENSMUSG00000029798	67138	Herc6	hect domain and RLD 6 [Source:MGI Symbol;Acc:MGI:1914388]	1.80197	2.67008	41.0255	1.50256e-10	2.66369e-09
ENSMUSG00000049420	77220	Tmem200a	transmembrane protein 200A [Source:MGI Symbol;Acc:MGI:1924470]	1.87726	4.51938	41.0142	1.51129e-10	2.67578e-09
ENSMUSG00000028086	50754	Fbxw7	F-box and WD-40 domain protein 7 [Source:MGI Symbol;Acc:MGI:1354695]	1.07372	9.04724	40.9814	1.53683e-10	2.71759e-09
ENSMUSG00000020023	319880	Tmcc3	transmembrane and coiled coil domains 3 [Source:MGI Symbol;Acc:MGI:2442900]	-1.35683	5.64611	40.9624	1.55184e-10	2.74068e-09
ENSMUSG00000045404	217826	Kcnk13	potassium channel, subfamily K, member 13 [Source:MGI Symbol;Acc:MGI:2384976]	-1.57585	2.1403	40.8663	1.63006e-10	2.87178e-09
ENSMUSG00000087006	620695	Gm13889	predicted gene 13889 [Source:MGI Symbol;Acc:MGI:3652053]	-1.37513	2.55446	40.8662	1.63016e-10	2.87178e-09
ENSMUSG00000032564	74020	Cpne4	copine IV [Source:MGI Symbol;Acc:MGI:1921270]	1.05912	6.19441	40.8485	1.64497e-10	2.89424e-09
ENSMUSG00000024486	15200	Hbegf	heparin-binding EGF-like growth factor [Source:MGI Symbol;Acc:MGI:96070]	-1.50772	4.60477	40.8448	1.64809e-10	2.89611e-09
ENSMUSG00000020122	13649	Egfr	epidermal growth factor receptor [Source:MGI Symbol;Acc:MGI:95294]	-1.86116	3.89778	40.8417	1.65075e-10	2.89716e-09
ENSMUSG00000020078	30930	Vps26a	VPS26 retromer complex component A [Source:MGI Symbol;Acc:MGI:1353654]	0.838665	5.51305	40.8265	1.66365e-10	2.91616e-09
ENSMUSG00000048706	52829	Lurap1l	leucine rich adaptor protein 1-like [Source:MGI Symbol;Acc:MGI:106510]	-1.28048	4.16256	40.8134	1.67477e-10	2.932e-09
ENSMUSG00000032263	12040	Bckdhb	branched chain ketoacid dehydrogenase E1, beta polypeptide [Source:MGI Symbol;Acc:MGI:88137]	-1.309	4.40823	40.7962	1.68963e-10	2.95434e-09
ENSMUSG00000031400	14381	G6pdx	glucose-6-phosphate dehydrogenase X-linked [Source:MGI Symbol;Acc:MGI:105979]	-1.13444	5.28215	40.7764	1.70683e-10	2.98069e-09
ENSMUSG00000026932	67991	Nacc2	nucleus accumbens associated 2, BEN and BTB (POZ) domain containing [Source:MGI Symbol;Acc:MGI:1915241]	-2.57954	6.47775	40.7631	1.71847e-10	2.99731e-09
ENSMUSG00000035439	76478	Haus8	4HAUS augmin-like complex, subunit 8 [Source:MGI Symbol;Acc:MGI:1923728]	-1.13595	2.81275	40.7206	1.75624e-10	3.05938e-09
ENSMUSG00000097640	NA	Gm20033	predicted gene, 20033 [Source:MGI Symbol;Acc:MGI:5012218]	-2.25826	-0.235267	40.6648	1.80714e-10	3.14415e-09
ENSMUSG00000046491	69183	C1qtnf2	C1q and tumor necrosis factor related protein 2 [Source:MGI Symbol;Acc:MGI:1916433]	-3.69248	-0.53649	40.6558	1.81546e-10	3.15473e-09
ENSMUSG00000057963	217837	Itpk1	inositol 1,3,4-triphosphate 5/6 kinase [Source:MGI Symbol;Acc:MGI:2446159]	1.13851	4.27957	40.6397	1.83049e-10	3.17692e-09
ENSMUSG00000037347	60322	Chst7	carbohydrate (N-acetylglucosamino) sulfotransferase 7 [Source:MGI Symbol;Acc:MGI:1891767]	-2.08181	0.0643409	40.5703	1.89668e-10	3.28773e-09
ENSMUSG00000048240	14708	Gng7	guanine nucleotide binding protein (G protein), gamma 7 [Source:MGI Symbol;Acc:MGI:95787]	-1.37193	8.69994	40.5127	1.95342e-10	3.38192e-09
ENSMUSG00000097745	NA	AI115009	expressed sequence AI115009 [Source:MGI Symbol;Acc:MGI:2139623]	1.89879	0.51157	40.5041	1.96204e-10	3.39267e-09
ENSMUSG00000031772	170571	Cntnap4	contactin associated protein-like 4 [Source:MGI Symbol;Acc:MGI:2183572]	-1.58809	5.41151	40.4826	1.98374e-10	3.42597e-09
ENSMUSG00000085208	NA	Brip1os	BRCA1 interacting protein C-terminal helicase 1, opposite strand [Source:MGI Symbol;Acc:MGI:1921288]	-1.34975	3.56601	40.4442	2.02307e-10	3.48962e-09
ENSMUSG00000038463	320078	Olfml2b	olfactomedin-like 2B [Source:MGI Symbol;Acc:MGI:2443310]	2.26969	3.38171	40.4383	2.02922e-10	3.49592e-09
ENSMUSG00000037257	66939	Aagab	alpha- and gamma-adaptin binding protein [Source:MGI Symbol;Acc:MGI:1914189]	1.0143	6.36829	40.4183	2.05011e-10	3.5276e-09
ENSMUSG00000043419	NA	Chd3os	chromodomain helicase DNA binding protein 3, opposite strand [Source:MGI Symbol;Acc:MGI:1915359]	-1.21943	6.87798	40.3883	2.08187e-10	3.57786e-09
ENSMUSG00000064036	71263	Mro	maestro [Source:MGI Symbol;Acc:MGI:2152817]	-1.79231	4.7841	40.3675	2.1041e-10	3.60833e-09
ENSMUSG00000036377	320827	C530008M17Rik	RIKEN cDNA C530008M17 gene [Source:MGI Symbol;Acc:MGI:2444817]	-1.09224	4.64499	40.3669	2.10473e-10	3.60833e-09
ENSMUSG00000034209	75668	Rasl10a	RAS-like, family 10, member A [Source:MGI Symbol;Acc:MGI:1922918]	1.46758	3.03439	40.255	2.2289e-10	3.81654e-09
ENSMUSG00000096054	64009	Syne1	spectrin repeat containing, nuclear envelope 1 [Source:MGI Symbol;Acc:MGI:1927152]	1.08525	7.92246	40.2437	2.24181e-10	3.83399e-09
ENSMUSG00000037679	70435	Inf2	inverted formin, FH2 and WH2 domain containing [Source:MGI Symbol;Acc:MGI:1917685]	-1.27733	4.8291	40.2082	2.28285e-10	3.89943e-09
ENSMUSG00000027544	18019	Nfatc2	nuclear factor of activated T cells, cytoplasmic, calcineurin dependent 2 [Source:MGI Symbol;Acc:MGI:102463]	-1.41344	3.2898	40.1641	2.33503e-10	3.98372e-09
ENSMUSG00000067925	66158	Cxx1a	CAAX box 1A [Source:MGI Symbol;Acc:MGI:1913408]	-1.36108	2.97905	39.9976	2.54277e-10	4.33288e-09
ENSMUSG00000100980	NA	Gm29100	predicted gene 29100 [Source:MGI Symbol;Acc:MGI:5579806]	2.4404	0.285434	39.9389	2.62033e-10	4.45964e-09
ENSMUSG00000029838	19242	Ptn	pleiotrophin [Source:MGI Symbol;Acc:MGI:97804]	1.41422	8.40374	39.9259	2.63787e-10	4.48405e-09
ENSMUSG00000061981	14252	Flot2	flotillin 2 [Source:MGI Symbol;Acc:MGI:103309]	0.90901	6.16789	39.8825	2.69713e-10	4.57926e-09
ENSMUSG00000068037	17171	Mas1	MAS1 oncogene [Source:MGI Symbol;Acc:MGI:96918]	2.45939	4.9234	39.8445	2.75011e-10	4.66357e-09
ENSMUSG00000097248	NA	Gm2694	predicted gene 2694 [Source:MGI Symbol;Acc:MGI:3780864]	1.98328	3.20394	39.817	2.78901e-10	4.72384e-09
ENSMUSG00000032487	19225	Ptgs2	prostaglandin-endoperoxide synthase 2 [Source:MGI Symbol;Acc:MGI:97798]	1.96097	3.40537	39.7634	2.86669e-10	4.84957e-09
ENSMUSG00000042638	14917	Gucy2c	guanylate cyclase 2c [Source:MGI Symbol;Acc:MGI:106903]	2.74443	-0.511217	39.7156	2.93774e-10	4.9638e-09
ENSMUSG00000006494	228026	Pdk1	pyruvate dehydrogenase kinase, isoenzyme 1 [Source:MGI Symbol;Acc:MGI:1926119]	1.173	5.07248	39.5775	3.15298e-10	5.32109e-09
ENSMUSG00000030898	12426	Cckbr	cholecystokinin B receptor [Source:MGI Symbol;Acc:MGI:99479]	1.65144	6.41337	39.5378	3.21767e-10	5.42373e-09
ENSMUSG00000046999	68725	1110032F04Rik	RIKEN cDNA 1110032F04 gene [Source:MGI Symbol;Acc:MGI:1915975]	1.50278	3.89603	39.527	3.23561e-10	5.44744e-09
ENSMUSG00000036890	227835	Gtdc1	glycosyltransferase-like domain containing 1 [Source:MGI Symbol;Acc:MGI:2444269]	1.2864	5.81053	39.466	3.33829e-10	5.6136e-09
ENSMUSG00000085912	NA	Trp53cor1	tumor protein p53 pathway corepressor 1 [Source:MGI Symbol;Acc:MGI:3801771]	-3.26904	-0.216547	39.433	3.39506e-10	5.70224e-09
ENSMUSG00000027506	21985	Tpd52	tumor protein D52 [Source:MGI Symbol;Acc:MGI:107749]	0.98608	5.68647	39.3961	3.45983e-10	5.8041e-09
ENSMUSG00000025658	245684	Cnksr2	connector enhancer of kinase suppressor of Ras 2 [Source:MGI Symbol;Acc:MGI:2661175]	1.04575	7.76478	39.2698	3.69107e-10	6.18463e-09
ENSMUSG00000052301	13446	Doc2a	double C2, alpha [Source:MGI Symbol;Acc:MGI:109446]	2.24178	0.977545	39.241	3.74593e-10	6.26908e-09
ENSMUSG00000039385	12563	Cdh6	cadherin 6 [Source:MGI Symbol;Acc:MGI:107435]	2.14005	3.64689	39.2166	3.79299e-10	6.3403e-09
ENSMUSG00000022947	109857	Cbr3	carbonyl reductase 3 [Source:MGI Symbol;Acc:MGI:1309992]	-2.30607	2.39399	39.1753	3.8741e-10	6.46818e-09
ENSMUSG00000062168	237178	Ppef1	protein phosphatase with EF hand calcium-binding domain 1 [Source:MGI Symbol;Acc:MGI:1097157]	2.42524	0.891991	39.1698	3.88508e-10	6.47882e-09
ENSMUSG00000041594	70551	Tmtc4	transmembrane and tetratricopeptide repeat containing 4 [Source:MGI Symbol;Acc:MGI:1921050]	-1.65779	4.3539	39.1665	3.89168e-10	6.48213e-09
ENSMUSG00000079657	328778	Rab26	RAB26, member RAS oncogene family [Source:MGI Symbol;Acc:MGI:2443284]	1.27557	4.9753	39.0949	4.03705e-10	6.71632e-09
ENSMUSG00000041000	67525	Trim62	tripartite motif-containing 62 [Source:MGI Symbol;Acc:MGI:1914775]	-1.16796	4.46528	39.0733	4.08194e-10	6.78296e-09
ENSMUSG00000073889	16157	Il11ra1	interleukin 11 receptor, alpha chain 1 [Source:MGI Symbol;Acc:MGI:107426]	1.34013	3.65937	38.9584	4.32935e-10	7.1842e-09
ENSMUSG00000038195	280408	Rilp	Rab interacting lysosomal protein [Source:MGI Symbol;Acc:MGI:2144271]	-1.96694	1.62549	38.9565	4.33362e-10	7.1842e-09
ENSMUSG00000024670	12511	Cd6	CD6 antigen [Source:MGI Symbol;Acc:MGI:103566]	2.48053	1.66234	38.9338	4.38428e-10	7.25962e-09
ENSMUSG00000053137	19094	Mapk11	mitogen-activated protein kinase 11 [Source:MGI Symbol;Acc:MGI:1338024]	1.56448	4.6956	38.8917	4.47979e-10	7.40904e-09
ENSMUSG00000047976	16485	Kcna1	potassium voltage-gated channel, shaker-related subfamily, member 1 [Source:MGI Symbol;Acc:MGI:96654]	-0.882078	8.8182	38.8581	4.55757e-10	7.52883e-09
ENSMUSG00000063458	76633	1700112E06Rik	RIKEN cDNA 1700112E06 gene [Source:MGI Symbol;Acc:MGI:1923883]	-3.5374	-0.123163	38.7239	4.88192e-10	8.05516e-09
ENSMUSG00000024084	70536	Qpct	glutaminyl-peptide cyclotransferase (glutaminyl cyclase) [Source:MGI Symbol;Acc:MGI:1917786]	-1.56618	4.82239	38.6429	5.08868e-10	8.38385e-09
ENSMUSG00000039629	320609	Strip2	striatin interacting protein 2 [Source:MGI Symbol;Acc:MGI:2444363]	-1.80982	4.49497	38.6413	5.09305e-10	8.38385e-09
ENSMUSG00000047330	57814	Kcne4	potassium voltage-gated channel, Isk-related subfamily, gene 4 [Source:MGI Symbol;Acc:MGI:1891125]	-3.38739	0.32781	38.6371	5.10391e-10	8.39191e-09
ENSMUSG00000040875	74486	Osbpl10	oxysterol binding protein-like 10 [Source:MGI Symbol;Acc:MGI:1921736]	1.85838	1.59877	38.6255	5.13438e-10	8.43214e-09
ENSMUSG00000000805	12351	Car4	carbonic anhydrase 4 [Source:MGI Symbol;Acc:MGI:1096574]	1.57157	5.92675	38.6203	5.14809e-10	8.44478e-09
ENSMUSG00000026437	18557	Cdk18	cyclin-dependent kinase 18 [Source:MGI Symbol;Acc:MGI:97518]	1.58285	3.78171	38.592	5.22331e-10	8.55819e-09
ENSMUSG00000050390	97130	C77080	expressed sequence C77080 [Source:MGI Symbol;Acc:MGI:2140651]	1.17931	4.21727	38.5598	5.31021e-10	8.69045e-09
ENSMUSG00000036334	242050	Igsf10	immunoglobulin superfamily, member 10 [Source:MGI Symbol;Acc:MGI:1923481]	-1.91377	1.6598	38.5316	5.38751e-10	8.80669e-09
ENSMUSG00000079055	110893	Slc8a3	solute carrier family 8 (sodium/calcium exchanger), member 3 [Source:MGI Symbol;Acc:MGI:107976]	-1.25252	4.80055	38.5071	5.45547e-10	8.90743e-09
ENSMUSG00000032890	242662	Rims3	regulating synaptic membrane exocytosis 3 [Source:MGI Symbol;Acc:MGI:2443331]	-1.01153	5.73945	38.476	5.54318e-10	9.04015e-09
ENSMUSG00000039714	235415	Cplx3	complexin 3 [Source:MGI Symbol;Acc:MGI:2384571]	-1.39348	4.43063	38.471	5.55738e-10	9.05281e-09
ENSMUSG00000026247	13599	Ecel1	endothelin converting enzyme-like 1 [Source:MGI Symbol;Acc:MGI:1343461]	-2.53157	2.39491	38.4675	5.56736e-10	9.05856e-09
ENSMUSG00000051951	497097	Xkr4	X-linked Kx blood group related 4 [Source:MGI Symbol;Acc:MGI:3528744]	-1.09069	4.65408	38.4647	5.57519e-10	9.06082e-09
ENSMUSG00000037242	29876	Clic4	chloride intracellular channel 4 (mitochondrial) [Source:MGI Symbol;Acc:MGI:1352754]	-1.81936	5.67134	38.4394	5.64811e-10	9.16261e-09
ENSMUSG00000019082	68267	Slc25a22	solute carrier family 25 (mitochondrial carrier, glutamate), member 22 [Source:MGI Symbol;Acc:MGI:1915517]	0.950993	7.04141	38.4384	5.65086e-10	9.16261e-09
ENSMUSG00000091811	66300	Inafm1	InaF motif containing 1 [Source:MGI Symbol;Acc:MGI:1913550]	-1.29814	4.34879	38.411	5.73083e-10	9.28157e-09
ENSMUSG00000056394	16881	Lig1	ligase I, DNA, ATP-dependent [Source:MGI Symbol;Acc:MGI:101789]	-1.15812	3.05287	38.1724	6.47631e-10	1.04769e-08
ENSMUSG00000027827	16497	Kcnab1	potassium voltage-gated channel, shaker-related subfamily, beta member 1 [Source:MGI Symbol;Acc:MGI:109155]	-1.62208	7.25109	38.1661	6.49714e-10	1.04985e-08
ENSMUSG00000000555	16402	Itga5	integrin alpha 5 (fibronectin receptor alpha) [Source:MGI Symbol;Acc:MGI:96604]	-2.83722	2.47486	38.1606	6.51546e-10	1.0516e-08
ENSMUSG00000030643	75985	Rab30	RAB30, member RAS oncogene family [Source:MGI Symbol;Acc:MGI:1923235]	-0.960526	3.52321	38.1327	6.60938e-10	1.06553e-08
ENSMUSG00000019990	29863	Pde7b	phosphodiesterase 7B [Source:MGI Symbol;Acc:MGI:1352752]	-1.90665	2.62153	38.1293	6.62094e-10	1.06618e-08
ENSMUSG00000025006	20411	Sorbs1	sorbin and SH3 domain containing 1 [Source:MGI Symbol;Acc:MGI:700014]	-1.57317	6.05831	38.1033	6.70954e-10	1.07921e-08
ENSMUSG00000063564	237759	Col23a1	collagen, type XXIII, alpha 1 [Source:MGI Symbol;Acc:MGI:2653243]	1.31663	4.16269	38.0684	6.83069e-10	1.09744e-08
ENSMUSG00000025417	117150	Pip4k2c	phosphatidylinositol-5-phosphate 4-kinase, type II, gamma [Source:MGI Symbol;Acc:MGI:2152214]	0.924727	5.74378	38.0073	7.04798e-10	1.13106e-08
ENSMUSG00000036095	217480	Dgkb	diacylglycerol kinase, beta [Source:MGI Symbol;Acc:MGI:2442474]	-1.05146	6.75431	37.9698	7.18477e-10	1.15169e-08
ENSMUSG00000052632	211914	Asap2	ArfGAP with SH3 domain, ankyrin repeat and PH domain 2 [Source:MGI Symbol;Acc:MGI:2685438]	1.05728	4.03074	37.9572	7.2314e-10	1.15785e-08
ENSMUSG00000026896	71586	Ifih1	interferon induced with helicase C domain 1 [Source:MGI Symbol;Acc:MGI:1918836]	1.64922	1.71705	37.931	7.32906e-10	1.17215e-08
ENSMUSG00000041548	80888	Hspb8	heat shock protein 8 [Source:MGI Symbol;Acc:MGI:2135756]	-2.57209	3.63203	37.8334	7.70496e-10	1.23087e-08
ENSMUSG00000045534	16493	Kcna5	potassium voltage-gated channel, shaker-related subfamily, member 5 [Source:MGI Symbol;Acc:MGI:96662]	-2.15383	2.26401	37.8272	7.72965e-10	1.23341e-08
ENSMUSG00000032724	99382	Abtb2	ankyrin repeat and BTB (POZ) domain containing 2 [Source:MGI Symbol;Acc:MGI:2139365]	-2.14577	3.81405	37.7675	7.96986e-10	1.2703e-08
ENSMUSG00000087165	NA	2010001A14Rik	RIKEN cDNA 2010001A14 gene [Source:MGI Symbol;Acc:MGI:1923766]	-2.2092	2.78164	37.7231	8.15354e-10	1.2981e-08
ENSMUSG00000026482	19731	Rgl1	ral guanine nucleotide dissociation stimulator,-like 1 [Source:MGI Symbol;Acc:MGI:107484]	0.713129	5.89665	37.7087	8.21382e-10	1.30622e-08
ENSMUSG00000048251	58208	Bcl11b	B cell leukemia/lymphoma 11B [Source:MGI Symbol;Acc:MGI:1929913]	-1.0268	6.20966	37.5767	8.78903e-10	1.39612e-08
ENSMUSG00000024063	77889	Lbh	limb-bud and heart [Source:MGI Symbol;Acc:MGI:1925139]	-3.52398	3.70284	37.567	8.83282e-10	1.40007e-08
ENSMUSG00000056158	72605	Car10	carbonic anhydrase 10 [Source:MGI Symbol;Acc:MGI:1919855]	1.36611	7.2652	37.5667	8.83383e-10	1.40007e-08
ENSMUSG00000042109	105859	Csdc2	cold shock domain containing C2, RNA binding [Source:MGI Symbol;Acc:MGI:2146027]	-1.29238	6.58071	37.5543	8.89033e-10	1.40744e-08
ENSMUSG00000024008	240058	Cpne5	copine V [Source:MGI Symbol;Acc:MGI:2385908]	-1.0927	6.41328	37.5122	9.08431e-10	1.43653e-08
ENSMUSG00000034023	211651	Fancd2	Fanconi anemia, complementation group D2 [Source:MGI Symbol;Acc:MGI:2448480]	1.45885	2.91392	37.5051	9.11754e-10	1.44016e-08
ENSMUSG00000038623	107769	Tm6sf1	transmembrane 6 superfamily member 1 [Source:MGI Symbol;Acc:MGI:1933209]	-1.5353	3.38741	37.4369	9.44165e-10	1.48968e-08
ENSMUSG00000040373	140723	Cacng5	calcium channel, voltage-dependent, gamma subunit 5 [Source:MGI Symbol;Acc:MGI:2157946]	-1.46479	4.23505	37.382	9.71163e-10	1.53056e-08
ENSMUSG00000021770	67630	Samd8	sterile alpha motif domain containing 8 [Source:MGI Symbol;Acc:MGI:1914880]	1.18312	7.25023	37.3243	1.00028e-09	1.57469e-08
ENSMUSG00000038112	244810	AW551984	expressed sequence AW551984 [Source:MGI Symbol;Acc:MGI:2143322]	-2.44374	3.1487	37.2739	1.02647e-09	1.61411e-08
ENSMUSG00000021719	52882	Rgs7bp	regulator of G-protein signalling 7 binding protein [Source:MGI Symbol;Acc:MGI:106334]	-1.17813	8.27633	37.1619	1.08718e-09	1.70766e-08
ENSMUSG00000024479	105853	Mal2	mal, T cell differentiation protein 2 [Source:MGI Symbol;Acc:MGI:2146021]	1.40768	8.20701	37.1278	1.10637e-09	1.73327e-08
ENSMUSG00000038020	268480	Rapgefl1	Rap guanine nucleotide exchange factor (GEF)-like 1 [Source:MGI Symbol;Acc:MGI:3611446]	0.811936	6.78033	37.1264	1.10716e-09	1.73327e-08
ENSMUSG00000029674	16885	Limk1	LIM-domain containing, protein kinase [Source:MGI Symbol;Acc:MGI:104572]	-1.53942	2.33604	37.1263	1.10718e-09	1.73327e-08
ENSMUSG00000005553	11944	Atp4a	ATPase, H+/K+ exchanging, gastric, alpha polypeptide [Source:MGI Symbol;Acc:MGI:88113]	2.33401	0.239017	37.0636	1.1434e-09	1.78798e-08
ENSMUSG00000029359	57816	Tesc	tescalcin [Source:MGI Symbol;Acc:MGI:1930803]	-1.37389	3.92484	37.019	1.16983e-09	1.82727e-08
ENSMUSG00000097131	NA	D230017M19Rik	RIKEN cDNA D230017M19 gene [Source:MGI Symbol;Acc:MGI:2445071]	-1.47617	1.41327	37.0072	1.17694e-09	1.83634e-08
ENSMUSG00000060260	101631	Pwwp2b	PWWP domain containing 2B [Source:MGI Symbol;Acc:MGI:2142008]	-1.46251	3.1664	37	1.1813e-09	1.8411e-08
ENSMUSG00000031134	19655	Rbmx	RNA binding motif protein, X chromosome [Source:MGI Symbol;Acc:MGI:1343044]	-1.33535	4.77457	36.9642	1.2032e-09	1.87315e-08
ENSMUSG00000052155	11480	Acvr2a	activin receptor IIA [Source:MGI Symbol;Acc:MGI:102806]	1.36645	5.52414	36.9611	1.20508e-09	1.87399e-08
ENSMUSG00000038319	16511	Kcnh2	potassium voltage-gated channel, subfamily H (eag-related), member 2 [Source:MGI Symbol;Acc:MGI:1341722]	-1.60164	1.57134	36.959	1.2064e-09	1.87399e-08
ENSMUSG00000097769	NA	Snhg4	small nucleolar RNA host gene 4 [Source:MGI Symbol;Acc:MGI:4937091]	-1.4311	3.65524	36.9274	1.22613e-09	1.90253e-08
ENSMUSG00000067724	231044	Gbx1	gastrulation brain homeobox 1 [Source:MGI Symbol;Acc:MGI:95667]	-3.99799	-1.07928	36.7908	1.31509e-09	2.03832e-08
ENSMUSG00000056214	93737	Pard6g	par-6 family cell polarity regulator gamma [Source:MGI Symbol;Acc:MGI:2135606]	-1.2038	2.7197	36.7405	1.34948e-09	2.08932e-08
ENSMUSG00000035615	666060	Frmpd1	FERM and PDZ domain containing 1 [Source:MGI Symbol;Acc:MGI:2446274]	-2.23779	2.9776	36.7035	1.3753e-09	2.12695e-08
ENSMUSG00000020173	12808	Cobl	cordon-bleu WH2 repeat [Source:MGI Symbol;Acc:MGI:105056]	1.38522	5.93015	36.6992	1.37832e-09	2.12928e-08
ENSMUSG00000050074	78709	Spink8	serine peptidase inhibitor, Kazal type 8 [Source:MGI Symbol;Acc:MGI:1925959]	1.85327	4.04545	36.6041	1.44728e-09	2.23336e-08
ENSMUSG00000004665	12798	Cnn2	calponin 2 [Source:MGI Symbol;Acc:MGI:105093]	-2.1413	1.84778	36.5961	1.45319e-09	2.24002e-08
ENSMUSG00000020323	73106	Prss57	protease, serine 57 [Source:MGI Symbol;Acc:MGI:1920356]	2.99117	-0.0930384	36.561	1.47962e-09	2.27826e-08
ENSMUSG00000028358	72701	Zfp618	zinc finger protein 618 [Source:MGI Symbol;Acc:MGI:1919950]	-1.23769	2.04924	36.5058	1.52215e-09	2.34119e-08
ENSMUSG00000032033	12023	Barx2	BarH-like homeobox 2 [Source:MGI Symbol;Acc:MGI:109617]	-1.44775	1.40012	36.4917	1.53319e-09	2.35558e-08
ENSMUSG00000029832	18025	Nfe2l3	nuclear factor, erythroid derived 2, like 3 [Source:MGI Symbol;Acc:MGI:1339958]	1.79676	2.13675	36.4328	1.58019e-09	2.42515e-08
ENSMUSG00000045613	243764	Chrm2	cholinergic receptor, muscarinic 2, cardiac [Source:MGI Symbol;Acc:MGI:88397]	-1.43021	4.2781	36.4198	1.59083e-09	2.43881e-08
ENSMUSG00000054855	223881	Rnd1	Rho family GTPase 1 [Source:MGI Symbol;Acc:MGI:2444878]	1.31854	3.12119	36.3514	1.64764e-09	2.52314e-08
ENSMUSG00000029185	68303	Fam114a1	family with sequence similarity 114, member A1 [Source:MGI Symbol;Acc:MGI:1915553]	-1.9474	2.50367	36.346	1.65214e-09	2.52729e-08
ENSMUSG00000086179	NA	Gm14317	predicted gene 14317 [Source:MGI Symbol;Acc:MGI:3651690]	1.61419	0.605338	36.3361	1.66063e-09	2.53752e-08
ENSMUSG00000038605	229011	Samd10	sterile alpha motif domain containing 10 [Source:MGI Symbol;Acc:MGI:2443872]	-1.11462	4.07555	36.3093	1.68357e-09	2.56977e-08
ENSMUSG00000039910	17684	Cited2	Cbp/p300-interacting transactivator, with Glu/Asp-rich carboxy-terminal domain, 2 [Source:MGI Symbol;Acc:MGI:1306784]	-1.65887	5.3944	36.2514	1.73437e-09	2.64444e-08
ENSMUSG00000038648	208647	Creb3l2	cAMP responsive element binding protein 3-like 2 [Source:MGI Symbol;Acc:MGI:2442695]	-1.66118	3.18747	36.1792	1.7998e-09	2.74124e-08
ENSMUSG00000030611	67994	Mrps11	mitochondrial ribosomal protein S11 [Source:MGI Symbol;Acc:MGI:1915244]	-0.776393	4.87551	36.1722	1.8063e-09	2.74816e-08
ENSMUSG00000036817	77053	Sun1	Sad1 and UNC84 domain containing 1 [Source:MGI Symbol;Acc:MGI:1924303]	1.10815	6.88935	36.1653	1.81268e-09	2.75488e-08
ENSMUSG00000070287	245020	Slc35g2	solute carrier family 35, member G2 [Source:MGI Symbol;Acc:MGI:2685365]	-1.54988	5.34072	36.1476	1.8292e-09	2.77699e-08
ENSMUSG00000050071	19716	Bex1	brain expressed X-linked 1 [Source:MGI Symbol;Acc:MGI:1328321]	-1.35304	5.23231	36.0893	1.88483e-09	2.85835e-08
ENSMUSG00000024420	225207	Zfp521	zinc finger protein 521 [Source:MGI Symbol;Acc:MGI:95459]	-1.74624	3.11152	36.0665	1.90699e-09	2.88884e-08
ENSMUSG00000040479	104418	Dgkz	diacylglycerol kinase zeta [Source:MGI Symbol;Acc:MGI:1278339]	1.1751	7.4861	36.0627	1.91073e-09	2.89139e-08
ENSMUSG00000048332	108927	Lhfp	lipoma HMGIC fusion partner [Source:MGI Symbol;Acc:MGI:1920048]	1.31246	5.36029	35.9171	2.05894e-09	3.11232e-08
ENSMUSG00000033032	106877	Afap1l1	actin filament associated protein 1-like 1 [Source:MGI Symbol;Acc:MGI:2147199]	1.30508	3.88315	35.8954	2.08201e-09	3.14381e-08
ENSMUSG00000072082	12449	Ccnf	cyclin F [Source:MGI Symbol;Acc:MGI:102551]	1.45033	1.98389	35.7668	2.22402e-09	3.35464e-08
ENSMUSG00000029705	13047	Cux1	cut-like homeobox 1 [Source:MGI Symbol;Acc:MGI:88568]	-1.05006	6.1898	35.7215	2.27639e-09	3.42996e-08
ENSMUSG00000021871	18950	Pnp	purine-nucleoside phosphorylase [Source:MGI Symbol;Acc:MGI:97365]	-1.72596	4.05492	35.701	2.30044e-09	3.46249e-08
ENSMUSG00000085035	NA	Gm12031	predicted gene 12031 [Source:MGI Symbol;Acc:MGI:3651406]	2.89357	0.143957	35.6744	2.33203e-09	3.50627e-08
ENSMUSG00000101337	100101919	Dnah7c	dynein, axonemal, heavy chain 7C [Source:MGI Symbol;Acc:MGI:3639762]	1.92313	1.33568	35.6709	2.33624e-09	3.50886e-08
ENSMUSG00000026205	22626	Slc23a3	solute carrier family 23 (nucleobase transporters), member 3 [Source:MGI Symbol;Acc:MGI:104516]	2.3732	0.517484	35.6646	2.3438e-09	3.51645e-08
ENSMUSG00000059401	333639	Mamld1	mastermind-like domain containing 1 [Source:MGI Symbol;Acc:MGI:3045303]	0.875465	5.38952	35.6513	2.3599e-09	3.53684e-08
ENSMUSG00000098557	239217	Kctd12	potassium channel tetramerisation domain containing 12 [Source:MGI Symbol;Acc:MGI:2145823]	-1.47323	5.37599	35.6395	2.37424e-09	3.55453e-08
ENSMUSG00000032431	56693	Crtap	cartilage associated protein [Source:MGI Symbol;Acc:MGI:1891221]	-1.77744	1.85385	35.5185	2.5264e-09	3.77832e-08
ENSMUSG00000043079	104027	Synpo	synaptopodin [Source:MGI Symbol;Acc:MGI:1099446]	0.970407	5.81499	35.4564	2.60818e-09	3.89647e-08
ENSMUSG00000043518	24004	Rai2	retinoic acid induced 2 [Source:MGI Symbol;Acc:MGI:1344378]	-0.983147	3.37591	35.4517	2.61453e-09	3.90181e-08
ENSMUSG00000030616	83671	Sytl2	synaptotagmin-like 2 [Source:MGI Symbol;Acc:MGI:1933366]	1.11597	5.94398	35.4424	2.6271e-09	3.9149e-08
ENSMUSG00000034112	69047	Atp2c2	ATPase, Ca++ transporting, type 2C, member 2 [Source:MGI Symbol;Acc:MGI:1916297]	2.60731	-0.0554661	35.4411	2.62887e-09	3.9149e-08
ENSMUSG00000041703	65100	Zic5	zinc finger protein of the cerebellum 5 [Source:MGI Symbol;Acc:MGI:1929518]	-2.19713	1.41693	35.4339	2.63855e-09	3.92516e-08
ENSMUSG00000039620	319582	6430573F11Rik	RIKEN cDNA 6430573F11 gene [Source:MGI Symbol;Acc:MGI:2442328]	1.09835	3.47672	35.3931	2.69444e-09	4.00407e-08
ENSMUSG00000047259	17202	Mc4r	melanocortin 4 receptor [Source:MGI Symbol;Acc:MGI:99457]	2.55844	2.64949	35.3844	2.7065e-09	4.01774e-08
ENSMUSG00000069911	574403	Fam196b	family with sequence similarity 196, member B [Source:MGI Symbol;Acc:MGI:3643491]	-2.82974	0.361965	35.1842	2.99947e-09	4.44794e-08
ENSMUSG00000086555	NA	Gm13446	predicted gene 13446 [Source:MGI Symbol;Acc:MGI:3649869]	1.20283	1.27005	35.144	3.06203e-09	4.5317e-08
ENSMUSG00000061353	20315	Cxcl12	chemokine (C-X-C motif) ligand 12 [Source:MGI Symbol;Acc:MGI:103556]	2.31196	4.59467	35.1438	3.06239e-09	4.5317e-08
ENSMUSG00000025408	13198	Ddit3	DNA-damage inducible transcript 3 [Source:MGI Symbol;Acc:MGI:109247]	-1.06561	4.17926	35.1371	3.07291e-09	4.54248e-08
ENSMUSG00000029868	NA	Trpv6	transient receptor potential cation channel, subfamily V, member 6 [Source:MGI Symbol;Acc:MGI:1927259]	1.64127	3.31852	35.0984	3.13456e-09	4.62874e-08
ENSMUSG00000048772	68777	Tmem53	transmembrane protein 53 [Source:MGI Symbol;Acc:MGI:1916027]	-1.64823	2.22226	35.0241	3.25642e-09	4.80365e-08
ENSMUSG00000038845	18673	Phb	prohibitin [Source:MGI Symbol;Acc:MGI:97572]	-0.975658	4.51627	34.9512	3.38079e-09	4.97975e-08
ENSMUSG00000040118	12293	Cacna2d1	calcium channel, voltage-dependent, alpha2/delta subunit 1 [Source:MGI Symbol;Acc:MGI:88295]	1.45817	8.54688	34.95	3.38289e-09	4.97975e-08
ENSMUSG00000007041	114584	Clic1	chloride intracellular channel 1 [Source:MGI Symbol;Acc:MGI:2148924]	-1.85328	4.14123	34.939	3.40206e-09	5.00274e-08
ENSMUSG00000032531	56332	Amotl2	angiomotin-like 2 [Source:MGI Symbol;Acc:MGI:1929286]	-1.44741	2.63509	34.9287	3.42e-09	5.02386e-08
ENSMUSG00000022053	13592	Ebf2	early B cell factor 2 [Source:MGI Symbol;Acc:MGI:894332]	2.7765	0.532583	34.911	3.45128e-09	5.06452e-08
ENSMUSG00000031539	64933	Ap3m2	adaptor-related protein complex 3, mu 2 subunit [Source:MGI Symbol;Acc:MGI:1929214]	0.865377	7.0556	34.8975	3.47522e-09	5.09433e-08
ENSMUSG00000047907	228911	Tshz2	teashirt zinc finger family member 2 [Source:MGI Symbol;Acc:MGI:2153084]	1.25746	4.39765	34.8694	3.52586e-09	5.1609e-08
ENSMUSG00000017747	80860	Ghdc	GH3 domain containing [Source:MGI Symbol;Acc:MGI:1931556]	-1.33354	2.73851	34.8682	3.52797e-09	5.1609e-08
ENSMUSG00000051985	226438	Igfn1	immunoglobulin-like and fibronectin type III domain containing 1 [Source:MGI Symbol;Acc:MGI:3045352]	2.19519	1.61222	34.8453	3.56975e-09	5.21658e-08
ENSMUSG00000020098	13180	Pcbd1	pterin 4 alpha carbinolamine dehydratase/dimerization cofactor of hepatocyte nuclear factor 1 alpha (TCF1) 1 [Source:MGI Symbol;Acc:MGI:94873]	-1.39903	2.60642	34.8431	3.57374e-09	5.21699e-08
ENSMUSG00000029201	22235	Ugdh	UDP-glucose dehydrogenase [Source:MGI Symbol;Acc:MGI:1306785]	-1.2371	4.46401	34.8347	3.5891e-09	5.23399e-08
ENSMUSG00000051316	24074	Taf7	TATA-box binding protein associated factor 7 [Source:MGI Symbol;Acc:MGI:1346348]	-0.865106	4.09914	34.8133	3.62886e-09	5.28647e-08
ENSMUSG00000025453	18115	Nnt	nicotinamide nucleotide transhydrogenase [Source:MGI Symbol;Acc:MGI:109279]	-1.01909	3.85462	34.8079	3.63899e-09	5.29575e-08
ENSMUSG00000021947	68631	Cryl1	crystallin, lambda 1 [Source:MGI Symbol;Acc:MGI:1915881]	0.96308	4.56667	34.7717	3.70722e-09	5.38946e-08
ENSMUSG00000022098	12153	Bmp1	bone morphogenetic protein 1 [Source:MGI Symbol;Acc:MGI:88176]	1.67734	4.50572	34.763	3.72391e-09	5.40813e-08
ENSMUSG00000035551	75426	Igfbpl1	insulin-like growth factor binding protein-like 1 [Source:MGI Symbol;Acc:MGI:1933198]	-2.45322	0.647112	34.7322	3.78314e-09	5.48848e-08
ENSMUSG00000058761	108937	Rnf169	ring finger protein 169 [Source:MGI Symbol;Acc:MGI:1920257]	0.869966	5.59386	34.7199	3.8072e-09	5.51769e-08
ENSMUSG00000050394	278097	Armcx6	armadillo repeat containing, X-linked 6 [Source:MGI Symbol;Acc:MGI:2147993]	-1.81826	0.848054	34.6423	3.96206e-09	5.73622e-08
ENSMUSG00000063229	16828	Ldha	lactate dehydrogenase A [Source:MGI Symbol;Acc:MGI:96759]	1.20938	8.70675	34.638	3.97074e-09	5.74287e-08
ENSMUSG00000024109	18189	Nrxn1	neurexin I [Source:MGI Symbol;Acc:MGI:1096391]	1.27898	10.4736	34.5755	4.10031e-09	5.92416e-08
ENSMUSG00000019936	13516	Epyc	epiphycan [Source:MGI Symbol;Acc:MGI:107942]	-1.98199	0.323048	34.5626	4.12769e-09	5.9576e-08
ENSMUSG00000050321	246317	Neto1	neuropilin (NRP) and tolloid (TLL)-like 1 [Source:MGI Symbol;Acc:MGI:2180216]	-1.21029	6.3227	34.489	4.28676e-09	6.18085e-08
ENSMUSG00000034327	105440	Kctd9	potassium channel tetramerisation domain containing 9 [Source:MGI Symbol;Acc:MGI:2145579]	-1.56604	3.26152	34.486	4.29324e-09	6.18349e-08
ENSMUSG00000059791	106582	Nrm	nurim (nuclear envelope membrane protein) [Source:MGI Symbol;Acc:MGI:2146855]	1.26655	2.45796	34.4841	4.29739e-09	6.18349e-08
ENSMUSG00000025986	227059	Slc39a10	solute carrier family 39 (zinc transporter), member 10 [Source:MGI Symbol;Acc:MGI:1914515]	1.53604	7.88733	34.4812	4.30379e-09	6.18636e-08
ENSMUSG00000090069	NA	E430024P14Rik	RIKEN cDNA E430024P14 gene [Source:MGI Symbol;Acc:MGI:2445079]	-1.35001	2.15023	34.4126	4.45831e-09	6.40193e-08
ENSMUSG00000050511	18386	Oprd1	opioid receptor, delta 1 [Source:MGI Symbol;Acc:MGI:97438]	-1.84641	1.08526	34.4036	4.47883e-09	6.42484e-08
ENSMUSG00000068962	232966	Zfp114	zinc finger protein 114 [Source:MGI Symbol;Acc:MGI:3037815]	-1.63252	0.604241	34.3182	4.67996e-09	6.70651e-08
ENSMUSG00000074872	381418	Ctxn2	cortexin 2 [Source:MGI Symbol;Acc:MGI:2139444]	-1.5627	5.01054	34.314	4.68997e-09	6.71401e-08
ENSMUSG00000054162	72902	Spock3	sparc/osteonectin, cwcv and kazal-like domains proteoglycan 3 [Source:MGI Symbol;Acc:MGI:1920152]	-1.57266	7.22568	34.2818	4.76811e-09	6.81893e-08
ENSMUSG00000021670	15357	Hmgcr	3-hydroxy-3-methylglutaryl-Coenzyme A reductase [Source:MGI Symbol;Acc:MGI:96159]	1.44187	7.73679	34.2498	4.84736e-09	6.92523e-08
ENSMUSG00000028634	16656	Hivep3	human immunodeficiency virus type I enhancer binding protein 3 [Source:MGI Symbol;Acc:MGI:106589]	0.890363	6.17908	34.2228	4.91487e-09	7.01454e-08
ENSMUSG00000000560	14395	Gabra2	gamma-aminobutyric acid (GABA) A receptor, subunit alpha 2 [Source:MGI Symbol;Acc:MGI:95614]	1.13548	6.1995	34.1897	4.99927e-09	7.12776e-08
ENSMUSG00000015484	329274	Fam163a	family with sequence similarity 163, member A [Source:MGI Symbol;Acc:MGI:3618859]	-1.96904	3.50702	34.1752	5.03657e-09	7.17367e-08
ENSMUSG00000026414	21956	Tnnt2	troponin T2, cardiac [Source:MGI Symbol;Acc:MGI:104597]	2.41314	1.67117	34.0979	5.24076e-09	7.45695e-08
ENSMUSG00000101693	NA	Gm19461	predicted gene, 19461 [Source:MGI Symbol;Acc:MGI:5011646]	-2.34481	-0.0227832	34.013	5.47456e-09	7.78173e-08
ENSMUSG00000031552	13524	Adam18	a disintegrin and metallopeptidase domain 18 [Source:MGI Symbol;Acc:MGI:105986]	2.64907	0.910474	33.9931	5.53073e-09	7.85364e-08
ENSMUSG00000050627	333433	Gpd1l	glycerol-3-phosphate dehydrogenase 1-like [Source:MGI Symbol;Acc:MGI:1289257]	0.8301	6.36043	33.9755	5.58118e-09	7.91287e-08
ENSMUSG00000005882	56046	Uqcc1	ubiquinol-cytochrome c reductase complex assembly factor 1 [Source:MGI Symbol;Acc:MGI:1929472]	-0.705866	5.01771	33.9746	5.5837e-09	7.91287e-08
ENSMUSG00000029915	23845	Clec5a	C-type lectin domain family 5, member a [Source:MGI Symbol;Acc:MGI:1345151]	-4.46157	1.59084	33.9595	5.62715e-09	7.96641e-08
ENSMUSG00000071517	100040233	Gm10334	predicted gene 10334 [Source:MGI Symbol;Acc:MGI:3641889]	2.86049	-0.693114	33.9387	5.68763e-09	8.04393e-08
ENSMUSG00000024981	433256	Acsl5	acyl-CoA synthetase long-chain family member 5 [Source:MGI Symbol;Acc:MGI:1919129]	1.22921	6.43573	33.9074	5.77973e-09	8.16598e-08
ENSMUSG00000032625	330267	Thsd7a	thrombospondin, type I, domain containing 7A [Source:MGI Symbol;Acc:MGI:2685683]	-1.10902	6.13371	33.9008	5.7994e-09	8.18554e-08
ENSMUSG00000041915	225339	Ammecr1l	AMME chromosomal region gene 1-like [Source:MGI Symbol;Acc:MGI:2442711]	-0.839943	4.57105	33.888	5.83773e-09	8.22597e-08
ENSMUSG00000041124	78100	Msantd4	Myb/SANT-like DNA-binding domain containing 4 with coiled-coils [Source:MGI Symbol;Acc:MGI:1925350]	-0.76541	6.1255	33.8873	5.83974e-09	8.22597e-08
ENSMUSG00000035064	13631	Eef2k	eukaryotic elongation factor-2 kinase [Source:MGI Symbol;Acc:MGI:1195261]	1.16807	4.71861	33.7883	6.14464e-09	8.64678e-08
ENSMUSG00000055976	71908	Cldn23	claudin 23 [Source:MGI Symbol;Acc:MGI:1919158]	2.42632	-0.281389	33.7265	6.34312e-09	8.91716e-08
ENSMUSG00000020251	74782	Glt8d2	glycosyltransferase 8 domain containing 2 [Source:MGI Symbol;Acc:MGI:1922032]	2.66286	3.56754	33.7132	6.38651e-09	8.96794e-08
ENSMUSG00000029033	140500	Acap3	ArfGAP with coiled-coil, ankyrin repeat and PH domains 3 [Source:MGI Symbol;Acc:MGI:2153589]	0.981686	5.4366	33.7115	6.392e-09	8.96794e-08
ENSMUSG00000043531	58178	Sorcs1	sortilin-related VPS10 domain containing receptor 1 [Source:MGI Symbol;Acc:MGI:1929666]	1.25531	6.43331	33.6904	6.46186e-09	9.05692e-08
ENSMUSG00000025534	110006	Gusb	glucuronidase, beta [Source:MGI Symbol;Acc:MGI:95872]	-1.05801	4.2726	33.6551	6.58033e-09	9.21377e-08
ENSMUSG00000030093	22421	Wnt7a	wingless-type MMTV integration site family, member 7A [Source:MGI Symbol;Acc:MGI:98961]	-1.48872	2.93943	33.6507	6.59504e-09	9.22518e-08
ENSMUSG00000090125	18991	Pou3f1	POU domain, class 3, transcription factor 1 [Source:MGI Symbol;Acc:MGI:101896]	1.42357	3.36287	33.6318	6.65953e-09	9.30189e-08
ENSMUSG00000079654	101359	Prrt4	proline-rich transmembrane protein 4 [Source:MGI Symbol;Acc:MGI:2141677]	-1.65857	1.43458	33.6307	6.66311e-09	9.30189e-08
ENSMUSG00000033885	218699	Pxk	PX domain containing serine/threonine kinase [Source:MGI Symbol;Acc:MGI:1289230]	-0.858654	4.78539	33.617	6.7105e-09	9.35875e-08
ENSMUSG00000021337	214189	Scgn	secretagogin, EF-hand calcium binding protein [Source:MGI Symbol;Acc:MGI:2384873]	-1.61284	0.712791	33.6016	6.76386e-09	9.42382e-08
ENSMUSG00000028832	16765	Stmn1	stathmin 1 [Source:MGI Symbol;Acc:MGI:96739]	1.19004	5.97302	33.5252	7.03455e-09	9.79126e-08
ENSMUSG00000051726	382571	Kcnf1	potassium voltage-gated channel, subfamily F, member 1 [Source:MGI Symbol;Acc:MGI:2687399]	1.39783	7.04083	33.5183	7.05979e-09	9.81667e-08
ENSMUSG00000020032	77976	Nuak1	NUAK family, SNF1-like kinase, 1 [Source:MGI Symbol;Acc:MGI:1925226]	0.990918	5.36497	33.512	7.08271e-09	9.8388e-08
ENSMUSG00000026141	12823	Col19a1	collagen, type XIX, alpha 1 [Source:MGI Symbol;Acc:MGI:1095415]	-1.31481	3.36453	33.499	7.1301e-09	9.89486e-08
ENSMUSG00000039960	69581	Rhou	ras homolog family member U [Source:MGI Symbol;Acc:MGI:1916831]	1.6438	5.71333	33.479	7.20359e-09	9.98699e-08
ENSMUSG00000041429	18207	Nthl1	nth (endonuclease III)-like 1 (E.coli) [Source:MGI Symbol;Acc:MGI:1313275]	-1.34352	1.15777	33.4727	7.22727e-09	1.00099e-07
ENSMUSG00000026885	74410	Ttll11	tubulin tyrosine ligase-like family, member 11 [Source:MGI Symbol;Acc:MGI:1921660]	-0.850632	4.14006	33.4347	7.36987e-09	1.01974e-07
ENSMUSG00000020175	76877	Rab36	RAB36, member RAS oncogene family [Source:MGI Symbol;Acc:MGI:1924127]	0.807588	5.09434	33.4171	7.43655e-09	1.02795e-07
ENSMUSG00000039458	268783	Mtmr12	myotubularin related protein 12 [Source:MGI Symbol;Acc:MGI:2443034]	0.925976	4.47149	33.3283	7.78434e-09	1.07497e-07
ENSMUSG00000051615	76108	Rap2a	RAS related protein 2a [Source:MGI Symbol;Acc:MGI:97855]	0.985419	7.08182	33.3197	7.8185e-09	1.07863e-07
ENSMUSG00000040612	100039795	Ildr2	immunoglobulin-like domain containing receptor 2 [Source:MGI Symbol;Acc:MGI:1196370]	1.0643	7.36633	33.2778	7.98888e-09	1.10106e-07
ENSMUSG00000067872	399599	Ccdc87	coiled-coil domain containing 87 [Source:MGI Symbol;Acc:MGI:3026882]	1.37948	0.979659	33.2567	8.07618e-09	1.112e-07
ENSMUSG00000031112	70415	Stk26	serine/threonine kinase 26 [Source:MGI Symbol;Acc:MGI:1917665]	-1.9976	0.776898	33.2483	8.11093e-09	1.11569e-07
ENSMUSG00000073481	67247	2018-03-02	mitochondrial amidoxime reducing component 2 [Source:MGI Symbol;Acc:MGI:1914497]	0.955958	5.92764	33.1374	8.58729e-09	1.18006e-07
ENSMUSG00000027419	18549	Pcsk2	proprotein convertase subtilisin/kexin type 2 [Source:MGI Symbol;Acc:MGI:97512]	1.19662	8.96172	33.1138	8.69179e-09	1.19325e-07
ENSMUSG00000035357	55983	Pdzrn3	PDZ domain containing RING finger 3 [Source:MGI Symbol;Acc:MGI:1933157]	1.18845	4.71632	33.0872	8.81168e-09	1.20853e-07
ENSMUSG00000019890	67405	Nts	neurotensin [Source:MGI Symbol;Acc:MGI:1328351]	-2.06949	4.47509	33.0727	8.8777e-09	1.2164e-07
ENSMUSG00000031925	270118	Maml2	mastermind like 2 (Drosophila) [Source:MGI Symbol;Acc:MGI:2389460]	1.55237	5.16757	33.0627	8.92333e-09	1.22146e-07
ENSMUSG00000025351	12512	Cd63	CD63 antigen [Source:MGI Symbol;Acc:MGI:99529]	-1.76688	5.91097	32.93	9.55362e-09	1.30552e-07
ENSMUSG00000031970	72185	Dbndd1	dysbindin (dystrobrevin binding protein 1) domain containing 1 [Source:MGI Symbol;Acc:MGI:1919435]	-1.17369	3.83543	32.9295	9.55598e-09	1.30552e-07
ENSMUSG00000086363	NA	A330102I10Rik	RIKEN cDNA A330102I10 gene [Source:MGI Symbol;Acc:MGI:1925170]	-1.42717	3.45635	32.9	9.70253e-09	1.32425e-07
ENSMUSG00000025268	80884	Maged2	melanoma antigen, family D, 2 [Source:MGI Symbol;Acc:MGI:1933391]	-1.12024	5.62587	32.8911	9.74665e-09	1.32898e-07
ENSMUSG00000059970	15512	Hspa2	heat shock protein 2 [Source:MGI Symbol;Acc:MGI:96243]	1.45448	5.74033	32.853	9.93984e-09	1.3525e-07
ENSMUSG00000006476	56876	Nsmf	NMDA receptor synaptonuclear signaling and neuronal migration factor [Source:MGI Symbol;Acc:MGI:1861755]	1.04977	7.97317	32.8523	9.94351e-09	1.3525e-07
ENSMUSG00000002771	14814	Grin2d	glutamate receptor, ionotropic, NMDA2D (epsilon 4) [Source:MGI Symbol;Acc:MGI:95823]	-1.32995	2.92039	32.8514	9.94798e-09	1.3525e-07
ENSMUSG00000004085	65964	Map3k20	mitogen-activated protein kinase kinase kinase 20 [Source:MGI Symbol;Acc:MGI:2443258]	-1.25973	3.16762	32.8175	1.01227e-08	1.37493e-07
ENSMUSG00000023046	16012	Igfbp6	insulin-like growth factor binding protein 6 [Source:MGI Symbol;Acc:MGI:96441]	1.62541	3.73364	32.7541	1.04585e-08	1.41917e-07
ENSMUSG00000097431	NA	Gm26782	predicted gene, 26782 [Source:MGI Symbol;Acc:MGI:5477276]	-1.07508	4.74048	32.7385	1.0543e-08	1.42925e-07
ENSMUSG00000038533	12396	Cbfa2t2	core-binding factor, runt domain, alpha subunit 2, translocated to, 2 (human) [Source:MGI Symbol;Acc:MGI:1333833]	1.46212	6.50623	32.6977	1.07664e-08	1.45813e-07
ENSMUSG00000029658	381693	Wdr95	WD40 repeat domain 95 [Source:MGI Symbol;Acc:MGI:1923042]	1.73685	0.968338	32.6487	1.10414e-08	1.49394e-07
ENSMUSG00000087331	NA	1810021B22Rik	RIKEN cDNA 1810021B22 gene [Source:MGI Symbol;Acc:MGI:1916370]	-2.08265	0.522073	32.6294	1.11512e-08	1.50735e-07
ENSMUSG00000021662	110596	Arhgef28	Rho guanine nucleotide exchange factor (GEF) 28 [Source:MGI Symbol;Acc:MGI:1346016]	1.1456	4.80572	32.6125	1.12487e-08	1.51907e-07
ENSMUSG00000020811	216881	Wscd1	WSC domain containing 1 [Source:MGI Symbol;Acc:MGI:2448493]	-0.934197	5.99697	32.6046	1.12949e-08	1.52383e-07
ENSMUSG00000018899	16362	Irf1	interferon regulatory factor 1 [Source:MGI Symbol;Acc:MGI:96590]	1.72182	1.98125	32.5922	1.13669e-08	1.53207e-07
ENSMUSG00000014773	13388	Dll1	delta-like 1 (Drosophila) [Source:MGI Symbol;Acc:MGI:104659]	-1.62443	0.868177	32.5021	1.19064e-08	1.60228e-07
ENSMUSG00000045027	70835	Prss22	protease, serine 22 [Source:MGI Symbol;Acc:MGI:1918085]	2.68861	0.689324	32.5014	1.19106e-08	1.60228e-07
ENSMUSG00000067578	228942	Cbln4	cerebellin 4 precursor protein [Source:MGI Symbol;Acc:MGI:2154433]	-1.59271	4.13594	32.4864	1.20028e-08	1.61315e-07
ENSMUSG00000006356	68337	Crip2	cysteine rich protein 2 [Source:MGI Symbol;Acc:MGI:1915587]	0.727488	6.94792	32.4366	1.23142e-08	1.65342e-07
ENSMUSG00000046607	12123	Hrk	harakiri, BCL2 interacting protein (contains only BH3 domain) [Source:MGI Symbol;Acc:MGI:1201608]	1.05583	5.92119	32.3972	1.25666e-08	1.6857e-07
ENSMUSG00000026768	241226	Itga8	integrin alpha 8 [Source:MGI Symbol;Acc:MGI:109442]	2.45779	1.92038	32.3867	1.26345e-08	1.69319e-07
ENSMUSG00000052726	240776	Kcnt2	potassium channel, subfamily T, member 2 [Source:MGI Symbol;Acc:MGI:3036273]	1.47941	4.73236	32.3819	1.26663e-08	1.69584e-07
ENSMUSG00000028488	20404	Sh3gl2	SH3-domain GRB2-like 2 [Source:MGI Symbol;Acc:MGI:700009]	1.12515	8.47419	32.3705	1.27404e-08	1.70413e-07
ENSMUSG00000033610	75735	Pank1	pantothenate kinase 1 [Source:MGI Symbol;Acc:MGI:1922985]	-1.37682	4.3992	32.3292	1.30144e-08	1.73912e-07
ENSMUSG00000090061	319807	Nwd2	NACHT and WD repeat domain containing 2 [Source:MGI Symbol;Acc:MGI:1920464]	1.46203	5.92376	32.2832	1.33259e-08	1.77762e-07
ENSMUSG00000029174	57915	Tbc1d1	TBC1 domain family, member 1 [Source:MGI Symbol;Acc:MGI:1889508]	1.07163	3.36999	32.283	1.33277e-08	1.77762e-07
ENSMUSG00000040483	327959	Xaf1	XIAP associated factor 1 [Source:MGI Symbol;Acc:MGI:3772572]	2.29869	1.63522	32.2726	1.33987e-08	1.78481e-07
ENSMUSG00000020689	16416	Itgb3	integrin beta 3 [Source:MGI Symbol;Acc:MGI:96612]	1.52466	2.45793	32.2714	1.3407e-08	1.78481e-07
ENSMUSG00000031994	30806	Adamts8	a disintegrin-like and metallopeptidase (reprolysin type) with thrombospondin type 1 motif, 8 [Source:MGI Symbol;Acc:MGI:1353468]	-1.86932	3.10052	32.2192	1.37722e-08	1.8317e-07
ENSMUSG00000021972	219150	Hmbox1	homeobox containing 1 [Source:MGI Symbol;Acc:MGI:2445066]	-1.30214	4.38086	32.1921	1.39657e-08	1.85567e-07
ENSMUSG00000020990	71091	Cdkl1	cyclin-dependent kinase-like 1 (CDC2-related kinase) [Source:MGI Symbol;Acc:MGI:1918341]	0.984082	3.26628	32.1864	1.4007e-08	1.85934e-07
ENSMUSG00000025555	223254	Farp1	FERM, RhoGEF (Arhgef) and pleckstrin domain protein 1 (chondrocyte-derived) [Source:MGI Symbol;Acc:MGI:2446173]	1.27095	5.55956	32.1846	1.40198e-08	1.85934e-07
ENSMUSG00000049191	331474	Rgag4	retrotransposon gag domain containing 4 [Source:MGI Symbol;Acc:MGI:3045324]	-1.17786	2.62412	32.1248	1.4458e-08	1.91565e-07
ENSMUSG00000020131	18551	Pcsk4	proprotein convertase subtilisin/kexin type 4 [Source:MGI Symbol;Acc:MGI:97514]	1.76085	1.33475	32.1085	1.45795e-08	1.92993e-07
ENSMUSG00000031230	80903	Fgf16	fibroblast growth factor 16 [Source:MGI Symbol;Acc:MGI:1931627]	-1.51103	0.0915721	32.0984	1.46559e-08	1.93822e-07
ENSMUSG00000032940	224344	Rbm11	RNA binding motif protein 11 [Source:MGI Symbol;Acc:MGI:2447622]	1.4283	2.61247	32.0725	1.48525e-08	1.96238e-07
ENSMUSG00000041975	228019	Mettl8	methyltransferase like 8 [Source:MGI Symbol;Acc:MGI:2385142]	-0.981954	4.05431	32.0679	1.48874e-08	1.96514e-07
ENSMUSG00000050534	15564	Htr5b	5-hydroxytryptamine (serotonin) receptor 5B [Source:MGI Symbol;Acc:MGI:96284]	2.26532	2.02439	32.0287	1.51908e-08	2.00256e-07
ENSMUSG00000044469	66443	Tnfaip8l1	tumor necrosis factor, alpha-induced protein 8-like 1 [Source:MGI Symbol;Acc:MGI:1913693]	1.33913	2.68706	32.0276	1.51994e-08	2.00256e-07
ENSMUSG00000055296	242474	Tmem245	transmembrane protein 245 [Source:MGI Symbol;Acc:MGI:2445107]	1.17792	6.76935	31.9949	1.54575e-08	2.03292e-07
ENSMUSG00000033161	11928	Atp1a1	ATPase, Na+/K+ transporting, alpha 1 polypeptide [Source:MGI Symbol;Acc:MGI:88105]	1.70828	8.53407	31.9948	1.54587e-08	2.03292e-07
ENSMUSG00000097974	NA	Gm10605	predicted gene 10605 [Source:MGI Symbol;Acc:MGI:3642596]	-1.56099	1.52361	31.9809	1.55697e-08	2.04515e-07
ENSMUSG00000055430	58243	Nap1l5	nucleosome assembly protein 1-like 5 [Source:MGI Symbol;Acc:MGI:1923555]	-1.50059	8.11568	31.9784	1.55893e-08	2.04515e-07
ENSMUSG00000022514	16180	Il1rap	interleukin 1 receptor accessory protein [Source:MGI Symbol;Acc:MGI:104975]	1.54889	5.61575	31.9777	1.55954e-08	2.04515e-07
ENSMUSG00000079037	19122	Prnp	prion protein [Source:MGI Symbol;Acc:MGI:97769]	1.11694	10.1264	31.9681	1.56722e-08	2.05331e-07
ENSMUSG00000047904	20606	Sstr2	somatostatin receptor 2 [Source:MGI Symbol;Acc:MGI:98328]	1.87547	5.82928	31.937	1.59256e-08	2.08457e-07
ENSMUSG00000042401	72832	Crtac1	cartilage acidic protein 1 [Source:MGI Symbol;Acc:MGI:1920082]	-1.33599	6.61506	31.9063	1.61789e-08	2.11574e-07
ENSMUSG00000058715	14127	Fcer1g	Fc receptor, IgE, high affinity I, gamma polypeptide [Source:MGI Symbol;Acc:MGI:95496]	-2.13221	4.85429	31.8811	1.63906e-08	2.14144e-07
ENSMUSG00000005686	11717	Ampd3	adenosine monophosphate deaminase 3 [Source:MGI Symbol;Acc:MGI:1096344]	-1.28925	4.27887	31.828	1.68444e-08	2.19869e-07
ENSMUSG00000040935	242726	Padi6	peptidyl arginine deiminase, type VI [Source:MGI Symbol;Acc:MGI:2655198]	2.3902	0.829601	31.8176	1.6935e-08	2.20847e-07
ENSMUSG00000072214	18951	2018-09-05	septin 5 [Source:MGI Symbol;Acc:MGI:1195461]	0.858409	6.38475	31.7864	1.72095e-08	2.24218e-07
ENSMUSG00000090523	71683	Gypc	glycophorin C [Source:MGI Symbol;Acc:MGI:1098566]	2.26692	0.727135	31.7736	1.73235e-08	2.25495e-07
ENSMUSG00000030707	12721	Coro1a	coronin, actin binding protein 1A [Source:MGI Symbol;Acc:MGI:1345961]	1.40746	5.37884	31.7478	1.75552e-08	2.28299e-07
ENSMUSG00000027634	29812	Ndrg3	N-myc downstream regulated gene 3 [Source:MGI Symbol;Acc:MGI:1352499]	0.831637	9.66369	31.7019	1.79745e-08	2.33535e-07
ENSMUSG00000025558	105445	Dock9	dedicator of cytokinesis 9 [Source:MGI Symbol;Acc:MGI:106321]	1.16004	6.34492	31.6788	1.81897e-08	2.36113e-07
ENSMUSG00000062859	21463	Tcp11	t-complex protein 11 [Source:MGI Symbol;Acc:MGI:98544]	3.04403	-0.691096	31.6337	1.86166e-08	2.41433e-07
ENSMUSG00000025404	71750	R3hdm2	R3H domain containing 2 [Source:MGI Symbol;Acc:MGI:1919000]	0.962575	6.4024	31.6222	1.87277e-08	2.42649e-07
ENSMUSG00000018339	14778	Gpx3	glutathione peroxidase 3 [Source:MGI Symbol;Acc:MGI:105102]	-1.3187	3.06092	31.6153	1.87946e-08	2.43292e-07
ENSMUSG00000069792	100034251	Wfdc17	WAP four-disulfide core domain 17 [Source:MGI Symbol;Acc:MGI:3649773]	3.01367	-0.496748	31.5966	1.89757e-08	2.4541e-07
ENSMUSG00000032532	12424	Cck	cholecystokinin [Source:MGI Symbol;Acc:MGI:88297]	1.53754	8.60788	31.5925	1.9016e-08	2.45704e-07
ENSMUSG00000039154	20420	Shd	src homology 2 domain-containing transforming protein D [Source:MGI Symbol;Acc:MGI:1099461]	-1.14033	3.59874	31.5565	1.93725e-08	2.50082e-07
ENSMUSG00000032058	73699	Ppp2r1b	protein phosphatase 2, regulatory subunit A, beta [Source:MGI Symbol;Acc:MGI:1920949]	-1.08951	3.97894	31.4928	2.00185e-08	2.58183e-07
ENSMUSG00000022377	13196	Asap1	ArfGAP with SH3 domain, ankyrin repeat and PH domain1 [Source:MGI Symbol;Acc:MGI:1342335]	0.851135	6.8636	31.4808	2.01421e-08	2.5954e-07
ENSMUSG00000032194	235041	Kank2	KN motif and ankyrin repeat domains 2 [Source:MGI Symbol;Acc:MGI:2384568]	-2.17057	2.59466	31.4703	2.02517e-08	2.60712e-07
ENSMUSG00000073000	NA	Gm10451	predicted gene 10451 [Source:MGI Symbol;Acc:MGI:3641898]	-2.07958	-0.538562	31.4507	2.04568e-08	2.63041e-07
ENSMUSG00000041741	54611	Pde3a	phosphodiesterase 3A, cGMP inhibited [Source:MGI Symbol;Acc:MGI:1860764]	-1.8673	2.17241	31.4493	2.04721e-08	2.63041e-07
ENSMUSG00000013076	75723	Amotl1	angiomotin-like 1 [Source:MGI Symbol;Acc:MGI:1922973]	-1.76212	6.09023	31.4465	2.05007e-08	2.63041e-07
ENSMUSG00000027367	99138	Stard7	START domain containing 7 [Source:MGI Symbol;Acc:MGI:2139090]	0.930395	7.54018	31.4459	2.05074e-08	2.63041e-07
ENSMUSG00000030110	19713	Ret	ret proto-oncogene [Source:MGI Symbol;Acc:MGI:97902]	-1.75053	2.52593	31.4424	2.05445e-08	2.63277e-07
ENSMUSG00000030613	66365	Ccdc90b	coiled-coil domain containing 90B [Source:MGI Symbol;Acc:MGI:1913615]	-1.21687	3.38429	31.4356	2.06163e-08	2.63956e-07
ENSMUSG00000020598	319504	Nrcam	neuronal cell adhesion molecule [Source:MGI Symbol;Acc:MGI:104750]	1.33069	8.4479	31.3884	2.11234e-08	2.701e-07
ENSMUSG00000028019	54635	Pdgfc	platelet-derived growth factor, C polypeptide [Source:MGI Symbol;Acc:MGI:1859631]	1.33839	3.05118	31.3874	2.11346e-08	2.701e-07
ENSMUSG00000059714	14251	Flot1	flotillin 1 [Source:MGI Symbol;Acc:MGI:1100500]	0.930136	5.70149	31.331	2.17576e-08	2.7781e-07
ENSMUSG00000005447	18476	Pafah1b3	platelet-activating factor acetylhydrolase, isoform 1b, subunit 3 [Source:MGI Symbol;Acc:MGI:108414]	-1.04275	2.86338	31.186	2.3445e-08	2.99084e-07
ENSMUSG00000003559	57344	As3mt	arsenic (+3 oxidation state) methyltransferase [Source:MGI Symbol;Acc:MGI:1929882]	-1.98555	3.89328	31.1723	2.36107e-08	3.00924e-07
ENSMUSG00000032280	21887	Tle3	transducin-like enhancer of split 3 [Source:MGI Symbol;Acc:MGI:104634]	1.03752	3.89936	31.1654	2.36956e-08	3.01732e-07
ENSMUSG00000038292	384619	Ccdc155	coiled-coil domain containing 155 [Source:MGI Symbol;Acc:MGI:2687329]	1.56735	1.25505	31.1272	2.41661e-08	3.07445e-07
ENSMUSG00000022865	13052	Cxadr	coxsackie virus and adenovirus receptor [Source:MGI Symbol;Acc:MGI:1201679]	1.15856	5.37709	31.1015	2.4488e-08	3.11258e-07
ENSMUSG00000025876	107448	Unc5a	unc-5 netrin receptor A [Source:MGI Symbol;Acc:MGI:894682]	1.36824	4.52843	31.0795	2.47671e-08	3.14306e-07
ENSMUSG00000041842	229474	Fhdc1	FH2 domain containing 1 [Source:MGI Symbol;Acc:MGI:2684972]	-1.70046	0.321951	31.0791	2.47724e-08	3.14306e-07
ENSMUSG00000045083	242384	Lingo2	leucine rich repeat and Ig domain containing 2 [Source:MGI Symbol;Acc:MGI:2442298]	1.02268	5.91695	31.0733	2.48462e-08	3.14957e-07
ENSMUSG00000001240	54409	Ramp2	receptor (calcitonin) activity modifying protein 2 [Source:MGI Symbol;Acc:MGI:1859650]	-1.31334	3.43754	31.0443	2.52208e-08	3.19419e-07
ENSMUSG00000052026	240332	Slc6a7	solute carrier family 6 (neurotransmitter transporter, L-proline), member 7 [Source:MGI Symbol;Acc:MGI:2147363]	1.62359	5.53978	30.9976	2.58342e-08	3.26893e-07
ENSMUSG00000027386	70370	Fbln7	fibulin 7 [Source:MGI Symbol;Acc:MGI:1917620]	1.80232	1.44338	30.9943	2.58787e-08	3.27161e-07
ENSMUSG00000021275	104859	Tecpr2	tectonin beta-propeller repeat containing 2 [Source:MGI Symbol;Acc:MGI:2144865]	0.943069	5.3831	30.966	2.62586e-08	3.31665e-07
ENSMUSG00000008489	15569	Elavl2	ELAV (embryonic lethal, abnormal vision, Drosophila)-like 2 (Hu antigen B) [Source:MGI Symbol;Acc:MGI:1100887]	-1.16264	6.38725	30.9561	2.63933e-08	3.32963e-07
ENSMUSG00000061878	20698	Sphk1	sphingosine kinase 1 [Source:MGI Symbol;Acc:MGI:1316649]	-2.26097	0.51116	30.955	2.64087e-08	3.32963e-07
ENSMUSG00000021990	219140	Spata13	spermatogenesis associated 13 [Source:MGI Symbol;Acc:MGI:104838]	-1.39456	3.42742	30.8961	2.7222e-08	3.42909e-07
ENSMUSG00000039519	13123	Cyp7b1	cytochrome P450, family 7, subfamily b, polypeptide 1 [Source:MGI Symbol;Acc:MGI:104978]	1.25414	4.19779	30.8747	2.75241e-08	3.46405e-07
ENSMUSG00000026463	381290	Atp2b4	ATPase, Ca++ transporting, plasma membrane 4 [Source:MGI Symbol;Acc:MGI:88111]	1.23066	7.77598	30.8475	2.79123e-08	3.50975e-07
ENSMUSG00000021959	50523	Lats2	large tumor suppressor 2 [Source:MGI Symbol;Acc:MGI:1354386]	-1.29093	3.53836	30.7739	2.89914e-08	3.6422e-07
ENSMUSG00000009681	110279	Bcr	breakpoint cluster region [Source:MGI Symbol;Acc:MGI:88141]	-0.809114	6.57962	30.7648	2.91276e-08	3.65604e-07
ENSMUSG00000001493	17285	Meox1	mesenchyme homeobox 1 [Source:MGI Symbol;Acc:MGI:103220]	2.54361	-0.497384	30.7515	2.93273e-08	3.67782e-07
ENSMUSG00000051029	282663	Serpinb1b	serine (or cysteine) peptidase inhibitor, clade B, member 1b [Source:MGI Symbol;Acc:MGI:2445361]	-1.88719	0.704571	30.72	2.98077e-08	3.73472e-07
ENSMUSG00000039646	246154	Vasn	vasorin [Source:MGI Symbol;Acc:MGI:2177651]	1.56739	2.49356	30.6795	3.04363e-08	3.81009e-07
ENSMUSG00000037902	19261	Sirpa	signal-regulatory protein alpha [Source:MGI Symbol;Acc:MGI:108563]	0.995799	9.07974	30.528	3.29084e-08	4.1159e-07
ENSMUSG00000036585	14164	Fgf1	fibroblast growth factor 1 [Source:MGI Symbol;Acc:MGI:95515]	-1.95781	6.2467	30.5077	3.32552e-08	4.15557e-07
ENSMUSG00000087633	NA	Gm14455	predicted gene 14455 [Source:MGI Symbol;Acc:MGI:3711286]	-1.61414	0.289533	30.4762	3.37984e-08	4.2197e-07
ENSMUSG00000039485	72480	Tspyl4	TSPY-like 4 [Source:MGI Symbol;Acc:MGI:106393]	-0.873436	8.20942	30.4262	3.46806e-08	4.326e-07
ENSMUSG00000023186	67776	Vwa5a	von Willebrand factor A domain containing 5A [Source:MGI Symbol;Acc:MGI:1915026]	-1.60001	3.19227	30.4078	3.50114e-08	4.36339e-07
ENSMUSG00000024143	104215	Rhoq	ras homolog family member Q [Source:MGI Symbol;Acc:MGI:1931553]	-1.59718	4.54912	30.4032	3.50942e-08	4.36983e-07
ENSMUSG00000046561	271970	Arsj	arylsulfatase J [Source:MGI Symbol;Acc:MGI:2443513]	2.18142	1.03092	30.4004	3.51459e-08	4.3724e-07
ENSMUSG00000019762	70337	Iyd	iodotyrosine deiodinase [Source:MGI Symbol;Acc:MGI:1917587]	2.01552	1.36683	30.3916	3.53048e-08	4.38829e-07
ENSMUSG00000035694	353025	Caps2	calcyphosphine 2 [Source:MGI Symbol;Acc:MGI:2441980]	-3.54265	-1.1206	30.3831	3.54599e-08	4.40367e-07
ENSMUSG00000050201	237987	Otop2	otopetrin 2 [Source:MGI Symbol;Acc:MGI:2388365]	2.69867	-0.102118	30.2924	3.71582e-08	4.6105e-07
ENSMUSG00000053963	381310	Stum	mechanosensory transduction mediator [Source:MGI Symbol;Acc:MGI:2138735]	1.00445	5.75975	30.2686	3.76167e-08	4.66327e-07
ENSMUSG00000085148	NA	Mir22hg	Mir22 host gene (non-protein coding) [Source:MGI Symbol;Acc:MGI:1914348]	1.08178	5.18821	30.2465	3.80472e-08	4.71249e-07
ENSMUSG00000038679	83925	Trps1	transcriptional repressor GATA binding 1 [Source:MGI Symbol;Acc:MGI:1927616]	-1.37138	5.26304	30.2257	3.84576e-08	4.75693e-07
ENSMUSG00000050910	237988	Cdr2l	cerebellar degeneration-related protein 2-like [Source:MGI Symbol;Acc:MGI:2684867]	-1.25124	4.85991	30.2249	3.84737e-08	4.75693e-07
ENSMUSG00000000078	23849	Klf6	Kruppel-like factor 6 [Source:MGI Symbol;Acc:MGI:1346318]	0.850244	5.46467	30.2163	3.86452e-08	4.77394e-07
ENSMUSG00000053368	140498	Rxfp2	relaxin/insulin-like family peptide receptor 2 [Source:MGI Symbol;Acc:MGI:2153463]	2.78016	1.13988	30.2088	3.87941e-08	4.78813e-07
ENSMUSG00000027335	11550	Adra1d	adrenergic receptor, alpha 1d [Source:MGI Symbol;Acc:MGI:106673]	1.84984	1.32705	30.2019	3.89331e-08	4.79908e-07
ENSMUSG00000056313	69068	1810011O10Rik	RIKEN cDNA 1810011O10 gene [Source:MGI Symbol;Acc:MGI:1916318]	-2.53794	0.491316	30.201	3.89511e-08	4.79908e-07
ENSMUSG00000030688	56018	Stard10	START domain containing 10 [Source:MGI Symbol;Acc:MGI:1860093]	-1.16561	2.85749	30.1986	3.89983e-08	4.80069e-07
ENSMUSG00000027568	18216	Ntsr1	neurotensin receptor 1 [Source:MGI Symbol;Acc:MGI:97386]	1.80662	3.31579	30.1713	3.95519e-08	4.86458e-07
ENSMUSG00000057058	78473	Skap1	src family associated phosphoprotein 1 [Source:MGI Symbol;Acc:MGI:1925723]	1.44903	1.48473	30.1513	3.99617e-08	4.91067e-07
ENSMUSG00000003355	66120	Fkbp11	FK506 binding protein 11 [Source:MGI Symbol;Acc:MGI:1913370]	-1.49033	0.977418	30.1368	4.0262e-08	4.94326e-07
ENSMUSG00000019888	67569	Mgat4c	MGAT4 family, member C [Source:MGI Symbol;Acc:MGI:1914819]	-1.19144	4.35386	30.119	4.06322e-08	4.98436e-07
ENSMUSG00000031258	331524	Xkrx	X-linked Kx blood group related, X-linked [Source:MGI Symbol;Acc:MGI:3584011]	-1.74607	0.997844	30.1044	4.09398e-08	5.01771e-07
ENSMUSG00000025141	68515	Myadml2	myeloid-associated differentiation marker-like 2 [Source:MGI Symbol;Acc:MGI:1915765]	-1.32559	1.66943	30.0438	4.22387e-08	5.16875e-07
ENSMUSG00000042406	11911	Atf4	activating transcription factor 4 [Source:MGI Symbol;Acc:MGI:88096]	-1.04767	6.06432	30.0435	4.22457e-08	5.16875e-07
ENSMUSG00000042485	66175	Mustn1	musculoskeletal, embryonic nuclear protein 1 [Source:MGI Symbol;Acc:MGI:1913425]	-1.43944	1.80544	30.0404	4.23137e-08	5.17258e-07
ENSMUSG00000045382	12767	Cxcr4	chemokine (C-X-C motif) receptor 4 [Source:MGI Symbol;Acc:MGI:109563]	-2.05042	-0.219494	30.0135	4.29058e-08	5.2404e-07
ENSMUSG00000027298	22174	Tyro3	TYRO3 protein tyrosine kinase 3 [Source:MGI Symbol;Acc:MGI:104294]	1.20404	6.32087	29.9653	4.39854e-08	5.36759e-07
ENSMUSG00000032202	11891	Rab27a	RAB27A, member RAS oncogene family [Source:MGI Symbol;Acc:MGI:1861441]	-1.27446	2.23656	29.9139	4.51669e-08	5.50699e-07
ENSMUSG00000063856	14775	Gpx1	glutathione peroxidase 1 [Source:MGI Symbol;Acc:MGI:104887]	-0.84926	6.75225	29.9069	4.53291e-08	5.52199e-07
ENSMUSG00000073856	434232	Iqck	IQ motif containing K [Source:MGI Symbol;Acc:MGI:3612188]	2.28014	1.14435	29.9005	4.54802e-08	5.53559e-07
ENSMUSG00000030322	17193	Mbd4	methyl-CpG binding domain protein 4 [Source:MGI Symbol;Acc:MGI:1333850]	0.985357	3.65477	29.8968	4.55662e-08	5.54126e-07
ENSMUSG00000024754	83921	Tmem2	transmembrane protein 2 [Source:MGI Symbol;Acc:MGI:1890373]	0.946898	5.09984	29.8707	4.61833e-08	5.61145e-07
ENSMUSG00000037406	330723	Htra4	HtrA serine peptidase 4 [Source:MGI Symbol;Acc:MGI:3036260]	2.16373	-0.00333808	29.8356	4.70266e-08	5.70897e-07
ENSMUSG00000031458	66423	Coprs	coordinator of PRMT5, differentiation stimulator [Source:MGI Symbol;Acc:MGI:1913673]	-1.0644	4.47462	29.8301	4.7162e-08	5.72048e-07
ENSMUSG00000032548	24059	Slco2a1	solute carrier organic anion transporter family, member 2a1 [Source:MGI Symbol;Acc:MGI:1346021]	2.11247	1.06325	29.8212	4.73777e-08	5.74169e-07
ENSMUSG00000075569	18861	Rsph10b	radial spoke head 10 homolog B (Chlamydomonas) [Source:MGI Symbol;Acc:MGI:1922386]	2.02929	2.11976	29.7985	4.79371e-08	5.80448e-07
ENSMUSG00000073530	23850	Pappa2	pappalysin 2 [Source:MGI Symbol;Acc:MGI:3051647]	2.6614	0.914115	29.7863	4.82396e-08	5.83608e-07
ENSMUSG00000052151	50784	Plpp2	phospholipid phosphatase 2 [Source:MGI Symbol;Acc:MGI:1354945]	-1.27079	2.53695	29.7809	4.83729e-08	5.84717e-07
ENSMUSG00000020732	58222	Rab37	RAB37, member RAS oncogene family [Source:MGI Symbol;Acc:MGI:1929945]	-2.38518	1.1565	29.772	4.85969e-08	5.86921e-07
ENSMUSG00000029376	665563	Mthfd2l	methylenetetrahydrofolate dehydrogenase (NADP+ dependent) 2-like [Source:MGI Symbol;Acc:MGI:1915871]	-1.31905	0.971672	29.7281	4.97092e-08	5.99839e-07
ENSMUSG00000022537	224090	Tmem44	transmembrane protein 44 [Source:MGI Symbol;Acc:MGI:1924489]	-0.876787	5.91182	29.7082	5.02221e-08	6.05508e-07
ENSMUSG00000046215	104582	Rprml	reprimo-like [Source:MGI Symbol;Acc:MGI:2144486]	1.14816	4.15723	29.6876	5.07596e-08	6.11351e-07
ENSMUSG00000038187	68815	Btbd10	BTB (POZ) domain containing 10 [Source:MGI Symbol;Acc:MGI:1916065]	1.28794	6.71651	29.6863	5.07937e-08	6.11351e-07
ENSMUSG00000023927	20230	Satb1	special AT-rich sequence binding protein 1 [Source:MGI Symbol;Acc:MGI:105084]	-1.04567	6.94848	29.6653	5.13446e-08	6.17453e-07
ENSMUSG00000024426	73242	Atat1	alpha tubulin acetyltransferase 1 [Source:MGI Symbol;Acc:MGI:1913869]	-0.903436	5.67902	29.6412	5.19885e-08	6.24661e-07
ENSMUSG00000052384	224109	Nrros	negative regulator of reactive oxygen species [Source:MGI Symbol;Acc:MGI:2445095]	1.21742	2.40175	29.6074	5.29031e-08	6.35108e-07
ENSMUSG00000030877	74466	Mfsd13b	major facilitator superfamily domain containing 13B [Source:MGI Symbol;Acc:MGI:1921716]	3.05083	-0.15181	29.6003	5.30977e-08	6.369e-07
ENSMUSG00000044816	98303	D630023F18Rik	RIKEN cDNA D630023F18 gene [Source:MGI Symbol;Acc:MGI:2138198]	1.38025	3.05902	29.5114	5.55893e-08	6.66219e-07
ENSMUSG00000073779	NA	Lrp8os2	low density lipoprotein receptor-related protein 8, apolipoprotein e receptor, opposite strand 2 [Source:MGI Symbol;Acc:MGI:3588233]	-2.33787	0.308255	29.4862	5.6316e-08	6.74353e-07
ENSMUSG00000049511	15551	Htr1b	5-hydroxytryptamine (serotonin) receptor 1B [Source:MGI Symbol;Acc:MGI:96274]	-1.33461	3.61023	29.4646	5.69477e-08	6.81337e-07
ENSMUSG00000020374	74563	Rasgef1c	RasGEF domain family, member 1C [Source:MGI Symbol;Acc:MGI:1921813]	0.913634	4.93169	29.4603	5.70742e-08	6.8227e-07
ENSMUSG00000007034	70129	Slc44a4	solute carrier family 44, member 4 [Source:MGI Symbol;Acc:MGI:1917379]	2.01749	0.692673	29.4387	5.77142e-08	6.89334e-07
ENSMUSG00000055471	11682	Alk	anaplastic lymphoma kinase [Source:MGI Symbol;Acc:MGI:103305]	-3.08157	-0.721971	29.4181	5.83293e-08	6.96089e-07
ENSMUSG00000005611	17540	Mrvi1	MRV integration site 1 [Source:MGI Symbol;Acc:MGI:1338023]	-3.62145	0.508776	29.4079	5.86379e-08	6.99179e-07
ENSMUSG00000035407	242553	Kank4	KN motif and ankyrin repeat domains 4 [Source:MGI Symbol;Acc:MGI:3043381]	-2.24934	0.720273	29.3927	5.90983e-08	7.04071e-07
ENSMUSG00000047205	75219	Dusp18	dual specificity phosphatase 18 [Source:MGI Symbol;Acc:MGI:1922469]	1.16689	5.68282	29.322	6.12961e-08	7.29636e-07
ENSMUSG00000041126	77605	H2afv	H2A histone family, member V [Source:MGI Symbol;Acc:MGI:1924855]	-1.0771	4.98916	29.319	6.1392e-08	7.3016e-07
ENSMUSG00000092492	NA	B230208B08Rik	RIKEN cDNA B230208B08 gene [Source:MGI Symbol;Acc:MGI:2442149]	2.63269	0.190572	29.2681	6.30231e-08	7.48926e-07
ENSMUSG00000026312	241201	Cdh7	cadherin 7, type 2 [Source:MGI Symbol;Acc:MGI:2442792]	-1.17606	4.94308	29.2351	6.41083e-08	7.61178e-07
ENSMUSG00000016526	226419	Dyrk3	dual-specificity tyrosine-(Y)-phosphorylation regulated kinase 3 [Source:MGI Symbol;Acc:MGI:1330300]	1.8014	2.72285	29.1691	6.63293e-08	7.86884e-07
ENSMUSG00000022321	320873	Cdh10	cadherin 10 [Source:MGI Symbol;Acc:MGI:107436]	1.35777	5.89905	29.1634	6.65249e-08	7.88539e-07
ENSMUSG00000039676	75568	Capsl	calcyphosine-like [Source:MGI Symbol;Acc:MGI:1922818]	1.85847	1.19051	29.1223	6.79511e-08	8.04766e-07
ENSMUSG00000026360	19735	Rgs2	regulator of G-protein signaling 2 [Source:MGI Symbol;Acc:MGI:1098271]	-1.2157	6.57248	29.0955	6.88959e-08	8.15268e-07
ENSMUSG00000041219	228482	Arhgap11a	Rho GTPase activating protein 11A [Source:MGI Symbol;Acc:MGI:2444300]	2.20352	1.93817	29.0415	7.08453e-08	8.37631e-07
ENSMUSG00000073096	243371	Lrrc61	leucine rich repeat containing 61 [Source:MGI Symbol;Acc:MGI:2652848]	-1.21432	2.54696	29.0252	7.14411e-08	8.43619e-07
ENSMUSG00000058173	170748	Smco4	single-pass membrane protein with coiled-coil domains 4 [Source:MGI Symbol;Acc:MGI:3039636]	-2.8551	-0.531515	29.0244	7.14718e-08	8.43619e-07
ENSMUSG00000070461	NA	9230112E08Rik	RIKEN cDNA 9230112E08 gene [Source:MGI Symbol;Acc:MGI:2444774]	0.952301	3.758	29.007	7.21179e-08	8.50532e-07
ENSMUSG00000023947	18037	Nfkbie	nuclear factor of kappa light polypeptide gene enhancer in B cells inhibitor, epsilon [Source:MGI Symbol;Acc:MGI:1194908]	-1.78741	0.90933	28.99	7.27527e-08	8.57299e-07
ENSMUSG00000062785	16504	Kcnc3	potassium voltage gated channel, Shaw-related subfamily, member 3 [Source:MGI Symbol;Acc:MGI:96669]	-1.16871	4.10741	28.9661	7.36544e-08	8.67197e-07
ENSMUSG00000057818	NA	1600029O15Rik	RIKEN cDNA 1600029O15 gene [Source:MGI Symbol;Acc:MGI:3045362]	1.97909	0.78114	28.9557	7.40528e-08	8.71159e-07
ENSMUSG00000041444	330914	Arhgap32	Rho GTPase activating protein 32 [Source:MGI Symbol;Acc:MGI:2450166]	1.04149	6.52145	28.922	7.5353e-08	8.85713e-07
ENSMUSG00000033355	67775	Rtp4	receptor transporter protein 4 [Source:MGI Symbol;Acc:MGI:1915025]	-1.82919	1.98451	28.9091	7.58568e-08	8.9089e-07
ENSMUSG00000085565	NA	Gm15721	predicted gene 15721 [Source:MGI Symbol;Acc:MGI:3783165]	1.16369	2.47055	28.9035	7.60769e-08	8.92729e-07
ENSMUSG00000003099	19060	Ppp5c	protein phosphatase 5, catalytic subunit [Source:MGI Symbol;Acc:MGI:102666]	0.817889	4.60242	28.8982	7.62825e-08	8.94394e-07
ENSMUSG00000030319	67088	Cand2	cullin-associated and neddylation-dissociated 2 (putative) [Source:MGI Symbol;Acc:MGI:1914338]	-1.77076	0.66934	28.8643	7.76299e-08	9.09434e-07
ENSMUSG00000024421	16774	Lama3	laminin, alpha 3 [Source:MGI Symbol;Acc:MGI:99909]	1.65978	0.710915	28.6689	8.58714e-08	1.00515e-06
ENSMUSG00000042978	104175	Sbk1	SH3-binding kinase 1 [Source:MGI Symbol;Acc:MGI:2135937]	-1.12503	6.7802	28.6451	8.69327e-08	1.01672e-06
ENSMUSG00000028186	22262	Uox	urate oxidase [Source:MGI Symbol;Acc:MGI:98907]	1.88134	0.535786	28.6345	8.74112e-08	1.02147e-06
ENSMUSG00000003309	11768	Ap1m2	adaptor protein complex AP-1, mu 2 subunit [Source:MGI Symbol;Acc:MGI:1336974]	1.75343	0.172476	28.6285	8.76833e-08	1.0238e-06
ENSMUSG00000029482	78894	Aacs	acetoacetyl-CoA synthetase [Source:MGI Symbol;Acc:MGI:1926144]	0.87975	4.76416	28.6233	8.79173e-08	1.02568e-06
ENSMUSG00000062257	330908	Opcml	opioid binding protein/cell adhesion molecule-like [Source:MGI Symbol;Acc:MGI:97397]	1.06678	8.6185	28.5909	8.93995e-08	1.0421e-06
ENSMUSG00000020657	217378	Dnajc27	DnaJ heat shock protein family (Hsp40) member C27 [Source:MGI Symbol;Acc:MGI:2443036]	-0.807965	6.91602	28.575	9.01374e-08	1.04984e-06
ENSMUSG00000053647	76854	Gper1	G protein-coupled estrogen receptor 1 [Source:MGI Symbol;Acc:MGI:1924104]	2.93665	1.05249	28.5644	9.06323e-08	1.05473e-06
ENSMUSG00000036086	226409	Zranb3	zinc finger, RAN-binding domain containing 3 [Source:MGI Symbol;Acc:MGI:1918362]	0.9385	2.68929	28.5517	9.12299e-08	1.0608e-06
ENSMUSG00000039652	208922	Cpeb3	cytoplasmic polyadenylation element binding protein 3 [Source:MGI Symbol;Acc:MGI:2443075]	-0.842329	4.55756	28.5188	9.27928e-08	1.07808e-06
ENSMUSG00000032773	12669	Chrm1	cholinergic receptor, muscarinic 1, CNS [Source:MGI Symbol;Acc:MGI:88396]	0.933997	7.93778	28.4716	9.5082e-08	1.10377e-06
ENSMUSG00000041923	319211	Nol4	nucleolar protein 4 [Source:MGI Symbol;Acc:MGI:2441684]	0.910506	5.81767	28.3942	9.8962e-08	1.14786e-06
ENSMUSG00000029167	19017	Ppargc1a	peroxisome proliferative activated receptor, gamma, coactivator 1 alpha [Source:MGI Symbol;Acc:MGI:1342774]	-0.998678	6.7205	28.3653	1.00449e-07	1.16415e-06
ENSMUSG00000048126	12835	Col6a3	collagen, type VI, alpha 3 [Source:MGI Symbol;Acc:MGI:88461]	-2.12394	1.10839	28.334	1.02087e-07	1.18216e-06
ENSMUSG00000030871	67417	Ears2	glutamyl-tRNA synthetase 2, mitochondrial [Source:MGI Symbol;Acc:MGI:1914667]	-0.931479	2.20351	28.3167	1.03004e-07	1.19179e-06
ENSMUSG00000021180	73086	Rps6ka5	ribosomal protein S6 kinase, polypeptide 5 [Source:MGI Symbol;Acc:MGI:1920336]	-1.3757	3.54952	28.3031	1.03729e-07	1.1992e-06
ENSMUSG00000041592	237979	Sdk2	sidekick cell adhesion molecule 2 [Source:MGI Symbol;Acc:MGI:2443847]	1.30263	4.53459	28.2923	1.04309e-07	1.20491e-06
ENSMUSG00000023949	21645	Tcte1	t-complex-associated testis expressed 1 [Source:MGI Symbol;Acc:MGI:98640]	-2.08371	0.187174	28.2805	1.04947e-07	1.21128e-06
ENSMUSG00000026546	71870	Cfap45	cilia and flagella associated protein 45 [Source:MGI Symbol;Acc:MGI:1919120]	1.94047	0.565887	28.2646	1.05814e-07	1.22028e-06
ENSMUSG00000061119	72461	Prcp	prolylcarboxypeptidase (angiotensinase C) [Source:MGI Symbol;Acc:MGI:1919711]	1.28299	3.57797	28.2147	1.08579e-07	1.25115e-06
ENSMUSG00000020319	216560	Wdpcp	WD repeat containing planar cell polarity effector [Source:MGI Symbol;Acc:MGI:2144467]	0.814641	3.42472	28.2089	1.08904e-07	1.25387e-06
ENSMUSG00000001687	24109	Ubl3	ubiquitin-like 3 [Source:MGI Symbol;Acc:MGI:1344373]	-0.961268	7.064	28.204	1.09179e-07	1.25601e-06
ENSMUSG00000000901	17385	Mmp11	matrix metallopeptidase 11 [Source:MGI Symbol;Acc:MGI:97008]	-1.49079	0.569856	28.1214	1.13941e-07	1.30972e-06
ENSMUSG00000031129	331004	Slc9a9	solute carrier family 9 (sodium/hydrogen exchanger), member 9 [Source:MGI Symbol;Acc:MGI:2679732]	1.19845	4.72717	28.1033	1.1501e-07	1.32093e-06
ENSMUSG00000073888	20301	Ccl27a	chemokine (C-C motif) ligand 27A [Source:MGI Symbol;Acc:MGI:1343459]	1.05476	5.549	28.084	1.16161e-07	1.33305e-06
ENSMUSG00000024883	225870	Rin1	Ras and Rab interactor 1 [Source:MGI Symbol;Acc:MGI:2385695]	0.862665	4.94443	28.0709	1.16948e-07	1.34099e-06
ENSMUSG00000032528	22354	Vipr1	vasoactive intestinal peptide receptor 1 [Source:MGI Symbol;Acc:MGI:109272]	1.55442	3.25849	28.0525	1.18066e-07	1.35271e-06
ENSMUSG00000037353	68614	Letmd1	LETM1 domain containing 1 [Source:MGI Symbol;Acc:MGI:1915864]	0.690945	6.58731	28.0489	1.1829e-07	1.35341e-06
ENSMUSG00000029123	64293	Stk32b	serine/threonine kinase 32B [Source:MGI Symbol;Acc:MGI:1927552]	-2.27345	1.65859	28.0484	1.1832e-07	1.35341e-06
ENSMUSG00000020562	75040	Efcab10	EF-hand calcium binding domain 10 [Source:MGI Symbol;Acc:MGI:1922290]	1.22055	2.16407	28.0442	1.18575e-07	1.35523e-06
ENSMUSG00000002108	22259	Nr1h3	nuclear receptor subfamily 1, group H, member 3 [Source:MGI Symbol;Acc:MGI:1352462]	-1.86209	1.24795	28.0168	1.20267e-07	1.37344e-06
ENSMUSG00000026749	59126	Nek6	NIMA (never in mitosis gene a)-related expressed kinase 6 [Source:MGI Symbol;Acc:MGI:1891638]	0.977667	4.62081	28.0095	1.20722e-07	1.37752e-06
ENSMUSG00000048385	170729	Scrt1	scratch family zinc finger 1 [Source:MGI Symbol;Acc:MGI:2176606]	-1.43396	2.91373	28.0015	1.21222e-07	1.3821e-06
ENSMUSG00000022089	57784	Bin3	bridging integrator 3 [Source:MGI Symbol;Acc:MGI:1929883]	0.948069	3.04175	27.9987	1.21397e-07	1.38298e-06
ENSMUSG00000022176	140743	Rem2	rad and gem related GTP binding protein 2 [Source:MGI Symbol;Acc:MGI:2155260]	-1.74961	1.51408	27.9954	1.21607e-07	1.38425e-06
ENSMUSG00000095930	245269	Nim1k	NIM1 serine/threonine protein kinase [Source:MGI Symbol;Acc:MGI:2442399]	0.9244	4.68586	27.9922	1.21806e-07	1.3854e-06
ENSMUSG00000000530	11482	Acvrl1	activin A receptor, type II-like 1 [Source:MGI Symbol;Acc:MGI:1338946]	-2.43141	2.24332	27.9386	1.25226e-07	1.42314e-06
ENSMUSG00000009633	14373	G0s2	G0/G1 switch gene 2 [Source:MGI Symbol;Acc:MGI:1316737]	-1.39879	1.44104	27.9285	1.2588e-07	1.42941e-06
ENSMUSG00000030123	67784	Plxnd1	plexin D1 [Source:MGI Symbol;Acc:MGI:2154244]	1.2961	3.68951	27.9183	1.26545e-07	1.43465e-06
ENSMUSG00000044288	12801	Cnr1	cannabinoid receptor 1 (brain) [Source:MGI Symbol;Acc:MGI:104615]	-1.44952	8.02547	27.9182	1.26552e-07	1.43465e-06
ENSMUSG00000027624	13821	Epb41l1	erythrocyte membrane protein band 4.1 like 1 [Source:MGI Symbol;Acc:MGI:103010]	-0.981313	8.71963	27.9168	1.26646e-07	1.43465e-06
ENSMUSG00000056870	70676	Gulp1	GULP, engulfment adaptor PTB domain containing 1 [Source:MGI Symbol;Acc:MGI:1920407]	-2.0545	1.06918	27.91	1.27089e-07	1.4385e-06
ENSMUSG00000059361	228777	Nrsn2	neurensin 2 [Source:MGI Symbol;Acc:MGI:2684969]	-1.67526	7.41324	27.8995	1.27782e-07	1.44518e-06
ENSMUSG00000049624	235504	Slc17a5	solute carrier family 17 (anion/sugar transporter), member 5 [Source:MGI Symbol;Acc:MGI:1924105]	0.958253	4.98425	27.8938	1.28159e-07	1.44828e-06
ENSMUSG00000057440	75739	Mpp7	membrane protein, palmitoylated 7 (MAGUK p55 subfamily member 7) [Source:MGI Symbol;Acc:MGI:1922989]	-1.2581	2.56083	27.8556	1.30712e-07	1.4759e-06
ENSMUSG00000029154	231293	Cwh43	cell wall biogenesis 43 C-terminal homolog [Source:MGI Symbol;Acc:MGI:2444131]	1.40698	2.31958	27.8541	1.30813e-07	1.4759e-06
ENSMUSG00000058153	56747	Sez6l	seizure related 6 homolog like [Source:MGI Symbol;Acc:MGI:1935121]	1.21474	7.34032	27.8415	1.31671e-07	1.48439e-06
ENSMUSG00000032719	226866	Sbspon	somatomedin B and thrombospondin, type 1 domain containing [Source:MGI Symbol;Acc:MGI:2684952]	-2.15162	-0.503978	27.8312	1.32371e-07	1.49109e-06
ENSMUSG00000027227	20322	Sord	sorbitol dehydrogenase [Source:MGI Symbol;Acc:MGI:98266]	-0.785938	4.36724	27.8185	1.33249e-07	1.4996e-06
ENSMUSG00000034308	74032	Sdr42e1	short chain dehydrogenase/reductase family 42E, member 1 [Source:MGI Symbol;Acc:MGI:1921282]	1.27543	2.85557	27.8171	1.33341e-07	1.4996e-06
ENSMUSG00000026179	56695	Pnkd	paroxysmal nonkinesiogenic dyskinesia [Source:MGI Symbol;Acc:MGI:1930773]	-0.65934	7.00179	27.7865	1.35467e-07	1.5223e-06
ENSMUSG00000060284	170574	Sp7	Sp7 transcription factor 7 [Source:MGI Symbol;Acc:MGI:2153568]	-2.43971	-0.453555	27.7799	1.35929e-07	1.52627e-06
ENSMUSG00000038151	12142	Prdm1	PR domain containing 1, with ZNF domain [Source:MGI Symbol;Acc:MGI:99655]	-2.9284	-0.447959	27.7777	1.36088e-07	1.52684e-06
ENSMUSG00000036923	216021	Stox1	storkhead box 1 [Source:MGI Symbol;Acc:MGI:2684909]	1.35841	1.94901	27.7614	1.37237e-07	1.53849e-06
ENSMUSG00000032769	277328	Trpa1	transient receptor potential cation channel, subfamily A, member 1 [Source:MGI Symbol;Acc:MGI:3522699]	3.70105	-0.488452	27.6876	1.42576e-07	1.59708e-06
ENSMUSG00000038917	NA	3930402G23Rik	RIKEN cDNA 3930402G23 gene [Source:MGI Symbol;Acc:MGI:1921277]	2.46485	-0.307871	27.6767	1.43382e-07	1.60483e-06
ENSMUSG00000017144	74194	Rnd3	Rho family GTPase 3 [Source:MGI Symbol;Acc:MGI:1921444]	-1.17476	4.44442	27.6691	1.43943e-07	1.60982e-06
ENSMUSG00000063887	192167	Nlgn1	neuroligin 1 [Source:MGI Symbol;Acc:MGI:2179435]	0.945859	7.0283	27.6635	1.44364e-07	1.61325e-06
ENSMUSG00000031780	20295	Ccl17	chemokine (C-C motif) ligand 17 [Source:MGI Symbol;Acc:MGI:1329039]	2.23715	3.27837	27.6444	1.45793e-07	1.62792e-06
ENSMUSG00000044933	20607	Sstr3	somatostatin receptor 3 [Source:MGI Symbol;Acc:MGI:98329]	1.66672	3.54639	27.5955	1.49527e-07	1.66829e-06
ENSMUSG00000075266	66311	Cenpw	centromere protein W [Source:MGI Symbol;Acc:MGI:1913561]	1.51227	2.72899	27.5624	1.52108e-07	1.69575e-06
ENSMUSG00000086822	NA	5330413P13Rik	RIKEN cDNA 5330413P13 gene [Source:MGI Symbol;Acc:MGI:3041161]	1.89768	0.806582	27.5464	1.53371e-07	1.70847e-06
ENSMUSG00000038879	223473	Nipal2	NIPA-like domain containing 2 [Source:MGI Symbol;Acc:MGI:1924488]	-1.33622	3.17052	27.5424	1.53688e-07	1.71064e-06
ENSMUSG00000028051	15168	Hcn3	hyperpolarization-activated, cyclic nucleotide-gated K+ 3 [Source:MGI Symbol;Acc:MGI:1298211]	-1.48148	2.44156	27.5354	1.54244e-07	1.71548e-06
ENSMUSG00000028790	20218	Khdrbs1	KH domain containing, RNA binding, signal transduction associated 1 [Source:MGI Symbol;Acc:MGI:893579]	-0.775807	5.60194	27.5125	1.56084e-07	1.73457e-06
ENSMUSG00000038323	73467	1700066M21Rik	RIKEN cDNA 1700066M21 gene [Source:MGI Symbol;Acc:MGI:1920717]	1.07136	4.3944	27.494	1.57584e-07	1.74985e-06
ENSMUSG00000040613	11810	Apobec1	apolipoprotein B mRNA editing enzyme, catalytic polypeptide 1 [Source:MGI Symbol;Acc:MGI:103298]	-3.0539	1.18279	27.4763	1.59029e-07	1.7645e-06
ENSMUSG00000029054	14403	Gabrd	gamma-aminobutyric acid (GABA) A receptor, subunit delta [Source:MGI Symbol;Acc:MGI:95622]	-1.10446	5.91412	27.4687	1.59656e-07	1.77007e-06
ENSMUSG00000043372	71059	Hexim2	hexamethylene bis-acetamide inducible 2 [Source:MGI Symbol;Acc:MGI:1918309]	-1.16956	2.72264	27.4304	1.6285e-07	1.80405e-06
ENSMUSG00000040648	227399	Ppip5k2	diphosphoinositol pentakisphosphate kinase 2 [Source:MGI Symbol;Acc:MGI:2142810]	-1.48168	4.29016	27.3739	1.67682e-07	1.85612e-06
ENSMUSG00000054453	236643	Sytl5	synaptotagmin-like 5 [Source:MGI Symbol;Acc:MGI:2668451]	-2.00445	1.19664	27.3722	1.67823e-07	1.85622e-06
ENSMUSG00000017417	72324	Plxdc1	plexin domain containing 1 [Source:MGI Symbol;Acc:MGI:1919574]	1.55078	4.83227	27.3144	1.72922e-07	1.91111e-06
ENSMUSG00000045180	110380	Shroom2	shroom family member 2 [Source:MGI Symbol;Acc:MGI:107194]	-0.877398	7.23479	27.2915	1.74983e-07	1.93238e-06
ENSMUSG00000025959	93691	Klf7	Kruppel-like factor 7 (ubiquitous) [Source:MGI Symbol;Acc:MGI:1935151]	0.731769	6.04789	27.2879	1.75309e-07	1.93446e-06
ENSMUSG00000022762	17968	Ncam2	neural cell adhesion molecule 2 [Source:MGI Symbol;Acc:MGI:97282]	1.19123	5.66723	27.2234	1.81249e-07	1.99843e-06
ENSMUSG00000016496	60533	Cd274	CD274 antigen [Source:MGI Symbol;Acc:MGI:1926446]	-2.14295	0.0983323	27.2124	1.82288e-07	2.00831e-06
ENSMUSG00000014554	27369	Dguok	deoxyguanosine kinase [Source:MGI Symbol;Acc:MGI:1351602]	-0.959817	3.73146	27.1807	1.85301e-07	2.03991e-06
ENSMUSG00000042429	11539	Adora1	adenosine A1 receptor [Source:MGI Symbol;Acc:MGI:99401]	0.996342	7.13788	27.1713	1.86205e-07	2.04733e-06
ENSMUSG00000032649	269132	Colgalt2	collagen beta(1-O)galactosyltransferase 2 [Source:MGI Symbol;Acc:MGI:2138232]	1.27573	2.27741	27.1706	1.86267e-07	2.04733e-06
ENSMUSG00000026833	56177	Olfm1	olfactomedin 1 [Source:MGI Symbol;Acc:MGI:1860437]	1.09436	10.5251	27.1499	1.8828e-07	2.06784e-06
ENSMUSG00000047656	107328	Trpt1	tRNA phosphotransferase 1 [Source:MGI Symbol;Acc:MGI:1333115]	-0.901107	3.50682	27.1351	1.89724e-07	2.08207e-06
ENSMUSG00000069670	432450	Nkain2	Na+/K+ transporting ATPase interacting 2 [Source:MGI Symbol;Acc:MGI:1923447]	0.967609	4.95273	27.1226	1.9095e-07	2.0939e-06
ENSMUSG00000018634	12921	Crhr1	corticotropin releasing hormone receptor 1 [Source:MGI Symbol;Acc:MGI:88498]	1.63651	3.79148	27.1042	1.92782e-07	2.11234e-06
ENSMUSG00000021848	18424	Otx2	orthodenticle homeobox 2 [Source:MGI Symbol;Acc:MGI:97451]	-3.12467	0.816947	27.0777	1.95438e-07	2.13977e-06
ENSMUSG00000044465	74349	Fam160a2	family with sequence similarity 160, member A2 [Source:MGI Symbol;Acc:MGI:1921599]	0.76762	4.56907	27.0077	2.02646e-07	2.21696e-06
ENSMUSG00000032763	216136	Ilvbl	ilvB (bacterial acetolactate synthase)-like [Source:MGI Symbol;Acc:MGI:1351911]	-0.965721	4.58856	26.9664	2.07024e-07	2.2631e-06
ENSMUSG00000024193	21652	Phf1	PHD finger protein 1 [Source:MGI Symbol;Acc:MGI:98647]	-1.08404	1.87065	26.9485	2.0895e-07	2.28238e-06
ENSMUSG00000038990	252966	Cables2	CDK5 and Abl enzyme substrate 2 [Source:MGI Symbol;Acc:MGI:2182335]	-1.01682	4.83395	26.9338	2.10545e-07	2.29801e-06
ENSMUSG00000039234	69608	Sec24d	Sec24 related gene family, member D (S. cerevisiae) [Source:MGI Symbol;Acc:MGI:1916858]	0.834568	2.46352	26.9235	2.1167e-07	2.3085e-06
ENSMUSG00000021974	14180	Fgf9	fibroblast growth factor 9 [Source:MGI Symbol;Acc:MGI:104723]	-1.10222	5.31008	26.9158	2.12515e-07	2.31592e-06
ENSMUSG00000047434	268880	Xxylt1	xyloside xylosyltransferase 1 [Source:MGI Symbol;Acc:MGI:2146443]	-1.12033	3.9757	26.9061	2.1358e-07	2.32572e-06
ENSMUSG00000034842	109979	Art3	ADP-ribosyltransferase 3 [Source:MGI Symbol;Acc:MGI:1202729]	-1.94998	1.71626	26.9046	2.13753e-07	2.3258e-06
ENSMUSG00000097182	NA	A830009L08Rik	RIKEN cDNA A830009L08 gene [Source:MGI Symbol;Acc:MGI:2443762]	1.34388	2.8623	26.9017	2.14076e-07	2.32752e-06
ENSMUSG00000020892	23801	Aloxe3	arachidonate lipoxygenase 3 [Source:MGI Symbol;Acc:MGI:1345140]	1.79585	2.95518	26.8927	2.15068e-07	2.33599e-06
ENSMUSG00000031790	17388	Mmp15	matrix metallopeptidase 15 [Source:MGI Symbol;Acc:MGI:109320]	-1.58295	2.44232	26.8916	2.15187e-07	2.33599e-06
ENSMUSG00000029802	26357	Abcg2	ATP-binding cassette, sub-family G (WHITE), member 2 [Source:MGI Symbol;Acc:MGI:1347061]	1.58767	4.50115	26.8896	2.15415e-07	2.33665e-06
ENSMUSG00000035547	12337	Capn5	calpain 5 [Source:MGI Symbol;Acc:MGI:1100859]	0.716142	5.38666	26.8572	2.19059e-07	2.37434e-06
ENSMUSG00000057469	50496	E2f6	E2F transcription factor 6 [Source:MGI Symbol;Acc:MGI:1354159]	-1.04593	4.14753	26.8511	2.19748e-07	2.37998e-06
ENSMUSG00000022658	56370	Tagln3	transgelin 3 [Source:MGI Symbol;Acc:MGI:1926784]	0.898179	8.76207	26.8371	2.21351e-07	2.3955e-06
ENSMUSG00000032207	15450	Lipc	lipase, hepatic [Source:MGI Symbol;Acc:MGI:96216]	2.31038	0.00570063	26.827	2.22507e-07	2.40616e-06
ENSMUSG00000022342	67498	Kcnv1	potassium channel, subfamily V, member 1 [Source:MGI Symbol;Acc:MGI:1914748]	1.57778	7.17855	26.7297	2.34002e-07	2.52852e-06
ENSMUSG00000014599	12977	Csf1	colony stimulating factor 1 (macrophage) [Source:MGI Symbol;Acc:MGI:1339753]	1.2225	3.04693	26.7182	2.35391e-07	2.54157e-06
ENSMUSG00000041028	66092	Ghitm	growth hormone inducible transmembrane protein [Source:MGI Symbol;Acc:MGI:1913342]	-0.706875	9.35807	26.6301	2.46371e-07	2.65809e-06
ENSMUSG00000054514	NA	Atad3aos	ATPase family, AAA domain containing 3A, opposite strand [Source:MGI Symbol;Acc:MGI:1917698]	-1.65975	0.535807	26.6199	2.4768e-07	2.67016e-06
ENSMUSG00000031972	11459	Acta1	actin, alpha 1, skeletal muscle [Source:MGI Symbol;Acc:MGI:87902]	0.865932	4.80223	26.5579	2.55752e-07	2.75507e-06
ENSMUSG00000022280	30945	Rnf19a	ring finger protein 19A [Source:MGI Symbol;Acc:MGI:1353623]	0.694308	4.98728	26.5404	2.5809e-07	2.77756e-06
ENSMUSG00000040181	14261	Fmo1	flavin containing monooxygenase 1 [Source:MGI Symbol;Acc:MGI:1310002]	-1.65674	3.14094	26.5393	2.58235e-07	2.77756e-06
ENSMUSG00000056091	20454	St3gal5	ST3 beta-galactoside alpha-2,3-sialyltransferase 5 [Source:MGI Symbol;Acc:MGI:1339963]	1.13156	6.69098	26.5338	2.58964e-07	2.78327e-06
ENSMUSG00000004317	12728	Clcn5	chloride channel, voltage-sensitive 5 [Source:MGI Symbol;Acc:MGI:99486]	-1.00506	4.0799	26.5155	2.61431e-07	2.80764e-06
ENSMUSG00000075478	76965	Slitrk1	SLIT and NTRK-like family, member 1 [Source:MGI Symbol;Acc:MGI:2679446]	1.37886	5.95067	26.5122	2.6188e-07	2.81032e-06
ENSMUSG00000043441	229357	Gpr149	G protein-coupled receptor 149 [Source:MGI Symbol;Acc:MGI:2443628]	-2.47869	0.784318	26.4968	2.63973e-07	2.83061e-06
ENSMUSG00000049107	18205	Ntf3	neurotrophin 3 [Source:MGI Symbol;Acc:MGI:97380]	1.59304	2.43707	26.4869	2.65329e-07	2.84299e-06
ENSMUSG00000001525	22154	Tubb5	tubulin, beta 5 class I [Source:MGI Symbol;Acc:MGI:107812]	0.85807	10.1794	26.4194	2.74768e-07	2.94188e-06
ENSMUSG00000052364	NA	B630019K06Rik	RIKEN cDNA B630019K06 gene [Source:MGI Symbol;Acc:MGI:2147918]	-1.1042	4.47959	26.3807	2.80327e-07	2.99911e-06
ENSMUSG00000075702	114679	Selenom	selenoprotein M [Source:MGI Symbol;Acc:MGI:2149786]	-1.03207	5.88211	26.3607	2.8324e-07	3.02798e-06
ENSMUSG00000037872	13349	Ackr1	atypical chemokine receptor 1 (Duffy blood group) [Source:MGI Symbol;Acc:MGI:1097689]	1.00352	6.80162	26.3412	2.86114e-07	3.05638e-06
ENSMUSG00000020758	192897	Itgb4	integrin beta 4 [Source:MGI Symbol;Acc:MGI:96613]	1.77302	1.49248	26.2459	3.00598e-07	3.20866e-06
ENSMUSG00000058400	229214	Qrfpr	pyroglutamylated RFamide peptide receptor [Source:MGI Symbol;Acc:MGI:2677633]	2.06085	3.52592	26.2199	3.04664e-07	3.2496e-06
ENSMUSG00000026094	98267	Stk17b	serine/threonine kinase 17b (apoptosis-inducing) [Source:MGI Symbol;Acc:MGI:2138162]	2.09362	3.79715	26.2054	3.06966e-07	3.27167e-06
ENSMUSG00000034810	20272	Scn7a	sodium channel, voltage-gated, type VII, alpha [Source:MGI Symbol;Acc:MGI:102965]	1.93486	2.1955	26.2008	3.07695e-07	3.27695e-06
ENSMUSG00000053931	71994	Cnn3	calponin 3, acidic [Source:MGI Symbol;Acc:MGI:1919244]	-1.33812	5.5614	26.1796	3.11089e-07	3.31059e-06
ENSMUSG00000042256	627626	Ptchd4	patched domain containing 4 [Source:MGI Symbol;Acc:MGI:1920485]	-1.11764	4.43521	26.173	3.12151e-07	3.31938e-06
ENSMUSG00000049686	109305	Orai1	ORAI calcium release-activated calcium modulator 1 [Source:MGI Symbol;Acc:MGI:1925542]	-1.25152	2.52156	26.1527	3.15459e-07	3.35202e-06
ENSMUSG00000027384	69487	Ndufaf5	NADH dehydrogenase (ubiquinone) complex I, assembly factor 5 [Source:MGI Symbol;Acc:MGI:1916737]	-0.709675	5.58999	26.1287	3.19408e-07	3.39142e-06
ENSMUSG00000075334	67874	Rprm	reprimo, TP53 dependent G2 arrest mediator candidate [Source:MGI Symbol;Acc:MGI:1915124]	1.27281	3.80911	26.094	3.25186e-07	3.45016e-06
ENSMUSG00000024664	60527	Fads3	fatty acid desaturase 3 [Source:MGI Symbol;Acc:MGI:1928740]	1.13424	5.34672	26.0891	3.26027e-07	3.45648e-06
ENSMUSG00000036278	107227	Macrod1	MACRO domain containing 1 [Source:MGI Symbol;Acc:MGI:2147583]	-1.46188	2.00609	26.0791	3.27706e-07	3.47166e-06
ENSMUSG00000047842	68203	Diras2	DIRAS family, GTP-binding RAS-like 2 [Source:MGI Symbol;Acc:MGI:1915453]	0.823617	7.37955	26.0471	3.33189e-07	3.52494e-06
ENSMUSG00000059412	11936	Fxyd2	FXYD domain-containing ion transport regulator 2 [Source:MGI Symbol;Acc:MGI:1195260]	-1.39558	3.37704	26.0468	3.33237e-07	3.52494e-06
ENSMUSG00000050640	231503	Tmem150c	transmembrane protein 150C [Source:MGI Symbol;Acc:MGI:3041258]	1.1349	5.15037	25.9837	3.4431e-07	3.63934e-06
ENSMUSG00000051243	320563	Islr2	immunoglobulin superfamily containing leucine-rich repeat 2 [Source:MGI Symbol;Acc:MGI:2444277]	1.47129	2.50768	25.979	3.45145e-07	3.64542e-06
ENSMUSG00000031146	18824	Plp2	proteolipid protein 2 [Source:MGI Symbol;Acc:MGI:1298382]	1.82458	0.869574	25.9717	3.46454e-07	3.6565e-06
ENSMUSG00000053007	231991	Creb5	cAMP responsive element binding protein 5 [Source:MGI Symbol;Acc:MGI:2443973]	-1.60538	1.38313	25.9606	3.48461e-07	3.67491e-06
ENSMUSG00000070565	226525	Rasal2	RAS protein activator like 2 [Source:MGI Symbol;Acc:MGI:2443881]	0.69315	6.05632	25.9585	3.48837e-07	3.67613e-06
ENSMUSG00000034164	140703	Emid1	EMI domain containing 1 [Source:MGI Symbol;Acc:MGI:2155091]	1.45609	2.07951	25.9542	3.49616e-07	3.68157e-06
ENSMUSG00000003134	54610	Tbc1d8	TBC1 domain family, member 8 [Source:MGI Symbol;Acc:MGI:1927225]	-1.18265	4.01665	25.9229	3.55336e-07	3.73901e-06
ENSMUSG00000074001	72330	Klhl40	kelch-like 40 [Source:MGI Symbol;Acc:MGI:1919580]	1.58765	4.05449	25.9062	3.58411e-07	3.76854e-06
ENSMUSG00000030403	22323	Vasp	vasodilator-stimulated phosphoprotein [Source:MGI Symbol;Acc:MGI:109268]	-1.71753	2.09804	25.9	3.59562e-07	3.77782e-06
ENSMUSG00000044629	380686	Cnrip1	cannabinoid receptor interacting protein 1 [Source:MGI Symbol;Acc:MGI:1917505]	0.929746	7.41548	25.8949	3.60519e-07	3.78505e-06
ENSMUSG00000036106	109270	Prr5	proline rich 5 (renal) [Source:MGI Symbol;Acc:MGI:1924714]	-2.03446	1.24639	25.8866	3.6207e-07	3.79849e-06
ENSMUSG00000032420	23959	Nt5e	5' nucleotidase, ecto [Source:MGI Symbol;Acc:MGI:99782]	-1.65897	2.84296	25.8796	3.63383e-07	3.80943e-06
ENSMUSG00000021716	67288	Srek1ip1	splicing regulatory glutamine/lysine-rich protein 1interacting protein 1 [Source:MGI Symbol;Acc:MGI:1914538]	-0.737595	5.14828	25.8664	3.6589e-07	3.83285e-06
ENSMUSG00000005681	11807	Apoa2	apolipoprotein A-II [Source:MGI Symbol;Acc:MGI:88050]	-1.2411	0.907412	25.8554	3.67969e-07	3.85175e-06
ENSMUSG00000034867	245886	Ankrd27	ankyrin repeat domain 27 (VPS9 domain) [Source:MGI Symbol;Acc:MGI:2444103]	0.804749	4.48047	25.8499	3.69023e-07	3.85992e-06
ENSMUSG00000036752	227613	Tubb4b	tubulin, beta 4B class IVB [Source:MGI Symbol;Acc:MGI:1915472]	0.994424	7.29753	25.8218	3.74443e-07	3.91369e-06
ENSMUSG00000030986	101437	Dhx32	DEAH (Asp-Glu-Ala-His) box polypeptide 32 [Source:MGI Symbol;Acc:MGI:2141813]	-0.959572	5.03772	25.7551	3.87602e-07	4.04823e-06
ENSMUSG00000091956	75697	C2cd4b	C2 calcium-dependent domain containing 4B [Source:MGI Symbol;Acc:MGI:1922947]	2.46894	-0.490863	25.751	3.88422e-07	4.05286e-06
ENSMUSG00000037568	226841	Vash2	vasohibin 2 [Source:MGI Symbol;Acc:MGI:2444826]	-1.60254	1.62477	25.75	3.88622e-07	4.05286e-06
ENSMUSG00000086567	NA	Gm2830	predicted gene 2830 [Source:MGI Symbol;Acc:MGI:3781002]	-1.45534	2.82004	25.7436	3.89915e-07	4.06332e-06
ENSMUSG00000097566	NA	A930024N18Rik	RIKEN cDNA A930024N18 gene [Source:MGI Symbol;Acc:MGI:4360907]	-1.72848	0.994778	25.7259	3.93515e-07	4.0978e-06
ENSMUSG00000025289	53381	Prdx4	peroxiredoxin 4 [Source:MGI Symbol;Acc:MGI:1859815]	1.0869	5.21237	25.7133	3.96091e-07	4.12157e-06
ENSMUSG00000000489	18591	Pdgfb	platelet derived growth factor, B polypeptide [Source:MGI Symbol;Acc:MGI:97528]	1.43343	4.04458	25.6745	4.04128e-07	4.20209e-06
ENSMUSG00000009214	66139	Tmem8c	transmembrane protein 8C [Source:MGI Symbol;Acc:MGI:1913389]	1.69236	0.572018	25.6192	4.15881e-07	4.32111e-06
ENSMUSG00000021870	83997	Slmap	sarcolemma associated protein [Source:MGI Symbol;Acc:MGI:1933549]	-0.674163	6.22712	25.6062	4.18696e-07	4.34714e-06
ENSMUSG00000074575	241794	Kcng1	potassium voltage-gated channel, subfamily G, member 1 [Source:MGI Symbol;Acc:MGI:3616086]	1.61855	5.22771	25.6023	4.19541e-07	4.3527e-06
ENSMUSG00000086119	NA	Gm2415	predicted gene 2415 [Source:MGI Symbol;Acc:MGI:3780582]	-1.06565	2.93425	25.5855	4.232e-07	4.38742e-06
ENSMUSG00000056215	74354	Lrguk	leucine-rich repeats and guanylate kinase domain containing [Source:MGI Symbol;Acc:MGI:1921604]	2.48354	-0.472475	25.5705	4.26502e-07	4.4184e-06
ENSMUSG00000006958	12667	Chrd	chordin [Source:MGI Symbol;Acc:MGI:1313268]	1.30855	3.48529	25.5561	4.29714e-07	4.4484e-06
ENSMUSG00000018932	26397	Map2k3	mitogen-activated protein kinase kinase 3 [Source:MGI Symbol;Acc:MGI:1346868]	1.07807	3.48057	25.5327	4.34945e-07	4.49923e-06
ENSMUSG00000039530	80286	Tusc3	tumor suppressor candidate 3 [Source:MGI Symbol;Acc:MGI:1933134]	1.20014	9.16766	25.5184	4.38178e-07	4.52934e-06
ENSMUSG00000020799	21689	Tekt1	tektin 1 [Source:MGI Symbol;Acc:MGI:1333819]	2.29248	0.225981	25.491	4.44442e-07	4.59072e-06
ENSMUSG00000075256	228094	Cerkl	ceramide kinase-like [Source:MGI Symbol;Acc:MGI:3037816]	1.90747	0.232684	25.4269	4.59465e-07	4.7424e-06
ENSMUSG00000028063	16905	Lmna	lamin A [Source:MGI Symbol;Acc:MGI:96794]	0.969958	3.94801	25.4104	4.63416e-07	4.77968e-06
ENSMUSG00000021704	382793	Mtx3	metaxin 3 [Source:MGI Symbol;Acc:MGI:2686040]	-0.932026	4.35178	25.4069	4.6426e-07	4.78487e-06
ENSMUSG00000073676	15528	Hspe1	heat shock protein 1 (chaperonin 10) [Source:MGI Symbol;Acc:MGI:104680]	-0.977923	5.50891	25.3773	4.7144e-07	4.85531e-06
ENSMUSG00000035032	208583	Nek11	NIMA (never in mitosis gene a)-related expressed kinase 11 [Source:MGI Symbol;Acc:MGI:2442276]	1.27336	0.67195	25.3753	4.71914e-07	4.85664e-06
ENSMUSG00000024962	22340	Vegfb	vascular endothelial growth factor B [Source:MGI Symbol;Acc:MGI:106199]	-1.29658	4.30329	25.3637	4.74759e-07	4.88235e-06
ENSMUSG00000001763	232670	Tspan33	tetraspanin 33 [Source:MGI Symbol;Acc:MGI:1919012]	1.15287	3.83896	25.359	4.75936e-07	4.89087e-06
ENSMUSG00000024659	16952	Anxa1	annexin A1 [Source:MGI Symbol;Acc:MGI:96819]	2.39087	1.61655	25.3495	4.78286e-07	4.91018e-06
ENSMUSG00000026672	71648	Optn	optineurin [Source:MGI Symbol;Acc:MGI:1918898]	-0.89999	3.55682	25.3485	4.78514e-07	4.91018e-06
ENSMUSG00000022419	97998	Deptor	DEP domain containing MTOR-interacting protein [Source:MGI Symbol;Acc:MGI:2146322]	0.827484	5.57115	25.31	4.88182e-07	5.00574e-06
ENSMUSG00000075330	NA	A930003A15Rik	RIKEN cDNA A930003A15 gene [Source:MGI Symbol;Acc:MGI:1915412]	-2.19079	-0.0635227	25.2953	4.91916e-07	5.04035e-06
ENSMUSG00000023942	63959	Slc29a1	solute carrier family 29 (nucleoside transporters), member 1 [Source:MGI Symbol;Acc:MGI:1927073]	-1.11418	4.05328	25.2867	4.94107e-07	5.05769e-06
ENSMUSG00000038446	71713	Cdc40	cell division cycle 40 [Source:MGI Symbol;Acc:MGI:1918963]	0.801445	5.60589	25.2858	4.94328e-07	5.05769e-06
ENSMUSG00000063760	268291	Rnf217	ring finger protein 217 [Source:MGI Symbol;Acc:MGI:3610311]	1.11863	4.59762	25.2653	4.99622e-07	5.10814e-06
ENSMUSG00000035048	69010	Anapc13	anaphase promoting complex subunit 13 [Source:MGI Symbol;Acc:MGI:1916260]	-1.30855	5.92787	25.2609	5.00762e-07	5.11607e-06
ENSMUSG00000074259	546134	Gramd2	GRAM domain containing 2 [Source:MGI Symbol;Acc:MGI:3528937]	1.4152	2.98607	25.2366	5.07098e-07	5.17704e-06
ENSMUSG00000045994	76898	B3gat1	beta-1,3-glucuronyltransferase 1 (glucuronosyltransferase P) [Source:MGI Symbol;Acc:MGI:1924148]	0.675388	6.60492	25.1888	5.19834e-07	5.30093e-06
ENSMUSG00000070509	244058	Rgma	repulsive guidance molecule family member A [Source:MGI Symbol;Acc:MGI:2679262]	1.23744	2.4305	25.1882	5.19988e-07	5.30093e-06
ENSMUSG00000017314	50997	Mpp2	membrane protein, palmitoylated 2 (MAGUK p55 subfamily member 2) [Source:MGI Symbol;Acc:MGI:1858257]	0.612722	6.05341	25.1836	5.21231e-07	5.30976e-06
ENSMUSG00000056972	27385	Magel2	melanoma antigen, family L, 2 [Source:MGI Symbol;Acc:MGI:1351648]	-2.17021	1.01566	25.1751	5.23546e-07	5.32948e-06
ENSMUSG00000047786	66643	Lix1	limb and CNS expressed 1 [Source:MGI Symbol;Acc:MGI:1913893]	1.48176	6.16044	25.1667	5.2583e-07	5.34824e-06
ENSMUSG00000006641	330064	Slc5a6	solute carrier family 5 (sodium-dependent vitamin transporter), member 6 [Source:MGI Symbol;Acc:MGI:2660847]	-1.19788	4.5115	25.1655	5.2615e-07	5.34824e-06
ENSMUSG00000026807	68870	Ak8	adenylate kinase 8 [Source:MGI Symbol;Acc:MGI:1916120]	2.10819	1.10424	25.1541	5.29259e-07	5.37541e-06
ENSMUSG00000001323	27364	Srr	serine racemase [Source:MGI Symbol;Acc:MGI:1351636]	0.776243	6.06424	25.1529	5.29588e-07	5.37541e-06
ENSMUSG00000022180	50934	Slc7a8	solute carrier family 7 (cationic amino acid transporter, y+ system), member 8 [Source:MGI Symbol;Acc:MGI:1355323]	1.18205	6.0868	25.1452	5.31726e-07	5.39322e-06
ENSMUSG00000038074	231997	Fkbp14	FK506 binding protein 14 [Source:MGI Symbol;Acc:MGI:2387639]	-1.01704	3.45872	25.142	5.326e-07	5.39672e-06
ENSMUSG00000020570	19027	Sypl	synaptophysin-like protein [Source:MGI Symbol;Acc:MGI:108081]	0.950379	6.15864	25.1411	5.32839e-07	5.39672e-06
ENSMUSG00000010406	68836	Mrpl52	mitochondrial ribosomal protein L52 [Source:MGI Symbol;Acc:MGI:1916086]	-0.947797	4.50224	25.1203	5.38633e-07	5.45148e-06
ENSMUSG00000035021	217578	Baz1a	bromodomain adjacent to zinc finger domain 1A [Source:MGI Symbol;Acc:MGI:1309478]	-2.09807	2.30915	25.1123	5.40872e-07	5.4702e-06
ENSMUSG00000003423	68845	Pih1d1	PIH1 domain containing 1 [Source:MGI Symbol;Acc:MGI:1916095]	0.69533	4.51792	25.1036	5.43324e-07	5.49105e-06
ENSMUSG00000040339	329739	Fam102b	family with sequence similarity 102, member B [Source:MGI Symbol;Acc:MGI:3036259]	-0.907544	5.81178	25.0256	5.65733e-07	5.71342e-06
ENSMUSG00000028399	19266	Ptprd	protein tyrosine phosphatase, receptor type, D [Source:MGI Symbol;Acc:MGI:97812]	0.910169	8.62831	25.0209	5.67131e-07	5.72342e-06
ENSMUSG00000032501	211770	Trib1	tribbles pseudokinase 1 [Source:MGI Symbol;Acc:MGI:2443397]	1.4622	4.24636	25.0166	5.68394e-07	5.73033e-06
ENSMUSG00000006395	68180	Hyi	hydroxypyruvate isomerase (putative) [Source:MGI Symbol;Acc:MGI:1915430]	-1.08317	1.47703	25.0158	5.6863e-07	5.73033e-06
ENSMUSG00000041014	18183	Nrg3	neuregulin 3 [Source:MGI Symbol;Acc:MGI:1097165]	0.914702	5.80552	25.0137	5.69245e-07	5.73241e-06
ENSMUSG00000036533	260409	Cdc42ep3	CDC42 effector protein (Rho GTPase binding) 3 [Source:MGI Symbol;Acc:MGI:2384718]	-1.20492	4.3154	24.9837	5.78178e-07	5.8182e-06
ENSMUSG00000068122	11609	Agtr2	angiotensin II receptor, type 2 [Source:MGI Symbol;Acc:MGI:87966]	-2.71737	0.264734	24.9559	5.86573e-07	5.89738e-06
ENSMUSG00000023345	70235	Poc1a	POC1 centriolar protein A [Source:MGI Symbol;Acc:MGI:1917485]	0.782654	4.65796	24.954	5.87137e-07	5.89738e-06
ENSMUSG00000038760	22045	Trhr	thyrotropin releasing hormone receptor [Source:MGI Symbol;Acc:MGI:98824]	2.02759	2.17863	24.9529	5.87495e-07	5.89738e-06
ENSMUSG00000021287	74335	Xrcc3	X-ray repair complementing defective repair in Chinese hamster cells 3 [Source:MGI Symbol;Acc:MGI:1921585]	-1.04604	2.80045	24.9521	5.87724e-07	5.89738e-06
ENSMUSG00000058620	11552	Adra2b	adrenergic receptor, alpha 2b [Source:MGI Symbol;Acc:MGI:87935]	-2.30613	1.50055	24.9321	5.93858e-07	5.95467e-06
ENSMUSG00000021071	94090	Trim9	tripartite motif-containing 9 [Source:MGI Symbol;Acc:MGI:2137354]	0.690625	8.10476	24.9189	5.97939e-07	5.99132e-06
ENSMUSG00000036862	233651	Dchs1	dachsous 1 (Drosophila) [Source:MGI Symbol;Acc:MGI:2685011]	-1.67392	2.5143	24.9088	6.0107e-07	6.01841e-06
ENSMUSG00000040407	100986	Akap9	A kinase (PRKA) anchor protein (yotiao) 9 [Source:MGI Symbol;Acc:MGI:2178217]	-0.954232	6.23056	24.8959	6.05098e-07	6.05442e-06
ENSMUSG00000021066	73991	Atl1	atlastin GTPase 1 [Source:MGI Symbol;Acc:MGI:1921241]	1.05561	7.86402	24.8776	6.10875e-07	6.10788e-06
ENSMUSG00000029151	22784	Slc30a3	solute carrier family 30 (zinc transporter), member 3 [Source:MGI Symbol;Acc:MGI:1345280]	1.11926	7.00922	24.8421	6.22219e-07	6.21689e-06
ENSMUSG00000040675	270685	Mthfd1l	methylenetetrahydrofolate dehydrogenase (NADP+ dependent) 1-like [Source:MGI Symbol;Acc:MGI:1924836]	1.02086	3.96909	24.8173	6.30293e-07	6.29308e-06
ENSMUSG00000024048	67268	Myl12a	myosin, light chain 12A, regulatory, non-sarcomeric [Source:MGI Symbol;Acc:MGI:1914518]	-0.943133	4.33599	24.8061	6.3395e-07	6.32511e-06
ENSMUSG00000007944	73032	Ttc9b	tetratricopeptide repeat domain 9B [Source:MGI Symbol;Acc:MGI:1920282]	1.05215	5.94396	24.7936	6.3808e-07	6.3618e-06
ENSMUSG00000050808	269328	Muc15	mucin 15 [Source:MGI Symbol;Acc:MGI:2442110]	3.0428	0.876207	24.7787	6.43042e-07	6.40672e-06
ENSMUSG00000043388	243339	Tmem130	transmembrane protein 130 [Source:MGI Symbol;Acc:MGI:3607706]	-1.1542	7.49696	24.7593	6.49542e-07	6.4669e-06
ENSMUSG00000037016	242022	Frem2	Fras1 related extracellular matrix protein 2 [Source:MGI Symbol;Acc:MGI:2444465]	-1.89579	1.57419	24.7455	6.54229e-07	6.50895e-06
ENSMUSG00000024875	68090	Yif1a	Yip1 interacting factor homolog A (S. cerevisiae) [Source:MGI Symbol;Acc:MGI:1915340]	-0.851707	4.95069	24.7293	6.59725e-07	6.55899e-06
ENSMUSG00000051950	381694	B3glct	beta-3-glucosyltransferase [Source:MGI Symbol;Acc:MGI:2685903]	0.834576	4.58172	24.7252	6.61136e-07	6.56838e-06
ENSMUSG00000015846	20181	Rxra	retinoid X receptor alpha [Source:MGI Symbol;Acc:MGI:98214]	-1.12599	3.45496	24.6713	6.79874e-07	6.74977e-06
ENSMUSG00000021747	74430	4930452B06Rik	RIKEN cDNA 4930452B06 gene [Source:MGI Symbol;Acc:MGI:1926154]	-1.02083	3.50902	24.6428	6.90025e-07	6.84571e-06
ENSMUSG00000017679	76080	Ttpal	tocopherol (alpha) transfer protein-like [Source:MGI Symbol;Acc:MGI:1923330]	0.690153	5.84332	24.6281	6.95287e-07	6.89305e-06
ENSMUSG00000043648	194908	Pld6	phospholipase D family, member 6 [Source:MGI Symbol;Acc:MGI:2687283]	-1.64519	0.0754126	24.6044	7.03913e-07	6.97364e-06
ENSMUSG00000070737	100039968	Tmem35b	transmembrane protein 35B [Source:MGI Symbol;Acc:MGI:3758095]	-1.42207	1.2355	24.5906	7.08967e-07	7.01877e-06
ENSMUSG00000008540	56615	Mgst1	microsomal glutathione S-transferase 1 [Source:MGI Symbol;Acc:MGI:1913850]	-2.05981	4.56368	24.5597	7.20424e-07	7.12718e-06
ENSMUSG00000045318	11553	Adra2c	adrenergic receptor, alpha 2c [Source:MGI Symbol;Acc:MGI:87936]	-1.17692	2.94698	24.5495	7.24254e-07	7.16003e-06
ENSMUSG00000028139	66353	Riiad1	regulatory subunit of type II PKA R-subunit (RIIa) domain containing 1 [Source:MGI Symbol;Acc:MGI:1913603]	1.70925	2.13736	24.5402	7.27767e-07	7.18971e-06
ENSMUSG00000050705	69662	2310061I04Rik	RIKEN cDNA 2310061I04 gene [Source:MGI Symbol;Acc:MGI:1916912]	-0.791136	4.97963	24.5321	7.30823e-07	7.21482e-06
ENSMUSG00000026904	94229	Slc4a10	solute carrier family 4, sodium bicarbonate cotransporter-like, member 10 [Source:MGI Symbol;Acc:MGI:2150150]	1.34161	7.57467	24.5151	7.37294e-07	7.2736e-06
ENSMUSG00000072812	NA	Ahnak2	AHNAK nucleoprotein 2 [Source:MGI Symbol;Acc:MGI:2144831]	2.02175	0.705049	24.468	7.55551e-07	7.44638e-06
ENSMUSG00000054021	68346	Sirt5	sirtuin 5 [Source:MGI Symbol;Acc:MGI:1915596]	-0.754946	3.40251	24.4672	7.55867e-07	7.44638e-06
ENSMUSG00000079330	213409	Lemd1	LEM domain containing 1 [Source:MGI Symbol;Acc:MGI:1922403]	0.823924	3.22226	24.4627	7.57606e-07	7.45828e-06
ENSMUSG00000027347	19419	Rasgrp1	RAS guanyl releasing protein 1 [Source:MGI Symbol;Acc:MGI:1314635]	0.857584	8.34816	24.432	7.69785e-07	7.57287e-06
ENSMUSG00000052713	269023	Zfp608	zinc finger protein 608 [Source:MGI Symbol;Acc:MGI:2442338]	-1.17978	3.83235	24.4176	7.75589e-07	7.62463e-06
ENSMUSG00000029386	NA	Tctn2	tectonic family member 2 [Source:MGI Symbol;Acc:MGI:1915228]	0.858411	4.88165	24.4118	7.77889e-07	7.64191e-06
ENSMUSG00000026458	68507	Ppfia4	protein tyrosine phosphatase, receptor type, f polypeptide (PTPRF), interacting protein (liprin), alpha 4 [Source:MGI Symbol;Acc:MGI:1915757]	-0.891037	5.21962	24.4028	7.81555e-07	7.67256e-06
ENSMUSG00000055805	57778	Fmnl1	formin-like 1 [Source:MGI Symbol;Acc:MGI:1888994]	0.868986	6.09904	24.3967	7.84023e-07	7.69141e-06
ENSMUSG00000054204	100294583	Fam150b	family with sequence similarity 150, member B [Source:MGI Symbol;Acc:MGI:3697448]	-1.8982	0.0630407	24.3883	7.87459e-07	7.71973e-06
ENSMUSG00000040795	230767	Iqcc	IQ motif containing C [Source:MGI Symbol;Acc:MGI:2446212]	-0.681937	3.53843	24.3791	7.91235e-07	7.74647e-06
ENSMUSG00000043773	NA	1700048O20Rik	RIKEN cDNA 1700048O20 gene [Source:MGI Symbol;Acc:MGI:1920637]	-1.40757	2.84146	24.3789	7.91288e-07	7.74647e-06
ENSMUSG00000028351	56710	Brinp1	bone morphogenic protein/retinoic acid inducible neural specific 1 [Source:MGI Symbol;Acc:MGI:1928478]	0.932614	8.61937	24.3718	7.94217e-07	7.76974e-06
ENSMUSG00000028995	84652	Fam126a	family with sequence similarity 126, member A [Source:MGI Symbol;Acc:MGI:2149839]	0.851352	4.49835	24.3564	8.00596e-07	7.82669e-06
ENSMUSG00000043162	66459	Pyurf	Pigy upstream reading frame [Source:MGI Symbol;Acc:MGI:1913709]	-1.18742	3.53838	24.3467	8.04658e-07	7.86093e-06
ENSMUSG00000041608	215446	Entpd3	ectonucleoside triphosphate diphosphohydrolase 3 [Source:MGI Symbol;Acc:MGI:1321386]	-1.35153	3.60001	24.3236	8.14371e-07	7.95029e-06
ENSMUSG00000069769	76626	Msi2	musashi RNA-binding protein 2 [Source:MGI Symbol;Acc:MGI:1923876]	-1.41515	5.04425	24.3175	8.16949e-07	7.96993e-06
ENSMUSG00000044847	72290	Lsm11	U7 snRNP-specific Sm-like protein LSM11 [Source:MGI Symbol;Acc:MGI:1919540]	1.05532	5.90683	24.315	8.17997e-07	7.97462e-06
ENSMUSG00000031928	17535	Mre11a	MRE11A homolog A, double strand break repair nuclease [Source:MGI Symbol;Acc:MGI:1100512]	-0.839108	2.80629	24.3077	8.2111e-07	7.99942e-06
ENSMUSG00000028607	12896	Cpt2	carnitine palmitoyltransferase 2 [Source:MGI Symbol;Acc:MGI:109176]	-1.83149	2.63953	24.2781	8.33827e-07	8.11769e-06
ENSMUSG00000010086	22671	Rnf112	ring finger protein 112 [Source:MGI Symbol;Acc:MGI:106611]	0.909564	5.99253	24.2764	8.34542e-07	8.11903e-06
ENSMUSG00000059456	19229	Ptk2b	PTK2 protein tyrosine kinase 2 beta [Source:MGI Symbol;Acc:MGI:104908]	1.00029	8.20917	24.2577	8.42706e-07	8.19278e-06
ENSMUSG00000100600	NA	A230077H06Rik	RIKEN cDNA A230077H06 gene [Source:MGI Symbol;Acc:MGI:2443592]	-1.38241	1.75182	24.2502	8.45971e-07	8.21884e-06
ENSMUSG00000005958	13845	Ephb3	Eph receptor B3 [Source:MGI Symbol;Acc:MGI:104770]	1.34916	3.87916	24.2406	8.50193e-07	8.25415e-06
ENSMUSG00000075271	78802	Ttc30a1	tetratricopeptide repeat domain 30A1 [Source:MGI Symbol;Acc:MGI:1926052]	-0.934404	2.03253	24.2377	8.51497e-07	8.26111e-06
ENSMUSG00000022216	19186	Psme1	proteasome (prosome, macropain) activator subunit 1 (PA28 alpha) [Source:MGI Symbol;Acc:MGI:1096367]	-0.761326	4.6329	24.236	8.52257e-07	8.26278e-06
ENSMUSG00000047419	76469	Cmya5	cardiomyopathy associated 5 [Source:MGI Symbol;Acc:MGI:1923719]	1.46119	1.62789	24.2238	8.57652e-07	8.30935e-06
ENSMUSG00000024563	17126	Smad2	SMAD family member 2 [Source:MGI Symbol;Acc:MGI:108051]	0.787259	4.86127	24.2021	8.67391e-07	8.39792e-06
ENSMUSG00000031198	67391	Fundc2	FUN14 domain containing 2 [Source:MGI Symbol;Acc:MGI:1914641]	-0.820089	6.54547	24.1646	8.84447e-07	8.55716e-06
ENSMUSG00000038936	109232	Sccpdh	saccharopine dehydrogenase (putative) [Source:MGI Symbol;Acc:MGI:1924486]	0.931281	6.7661	24.1334	8.98895e-07	8.69097e-06
ENSMUSG00000022667	57781	Cd200r1	CD200 receptor 1 [Source:MGI Symbol;Acc:MGI:1889024]	2.37819	0.0721587	24.1264	9.0215e-07	8.71644e-06
ENSMUSG00000044243	320522	Bhlha9	basic helix-loop-helix family, member a9 [Source:MGI Symbol;Acc:MGI:2444198]	1.57832	0.282639	24.0981	9.15498e-07	8.83934e-06
ENSMUSG00000038866	227449	Zcchc2	zinc finger, CCHC domain containing 2 [Source:MGI Symbol;Acc:MGI:2444114]	0.817958	4.21858	24.0702	9.28859e-07	8.96218e-06
ENSMUSG00000026782	329165	Abi2	abl-interactor 2 [Source:MGI Symbol;Acc:MGI:106913]	0.727212	8.15704	24.0603	9.33672e-07	9.00244e-06
ENSMUSG00000022044	56471	Stmn4	stathmin-like 4 [Source:MGI Symbol;Acc:MGI:1931224]	0.910656	7.30965	24.0194	9.53679e-07	9.18764e-06
ENSMUSG00000009013	56455	Dynll1	dynein light chain LC8-type 1 [Source:MGI Symbol;Acc:MGI:1861457]	0.902764	8.62044	24.0182	9.54288e-07	9.18764e-06
ENSMUSG00000020330	15366	Hmmr	hyaluronan mediated motility receptor (RHAMM) [Source:MGI Symbol;Acc:MGI:104667]	1.59956	0.868422	24.0171	9.5484e-07	9.18764e-06
ENSMUSG00000082373	NA	Gm13754	predicted gene 13754 [Source:MGI Symbol;Acc:MGI:3651213]	2.32068	0.184645	23.9965	9.65125e-07	9.28025e-06
ENSMUSG00000030584	29861	Dpf1	D4, zinc and double PHD fingers family 1 [Source:MGI Symbol;Acc:MGI:1352748]	0.779695	4.66929	23.9839	9.71466e-07	9.33483e-06
ENSMUSG00000035769	102448	Xylb	xylulokinase homolog (H. influenzae) [Source:MGI Symbol;Acc:MGI:2142985]	1.23073	2.05422	23.973	9.76958e-07	9.3812e-06
ENSMUSG00000036112	56307	Metap2	methionine aminopeptidase 2 [Source:MGI Symbol;Acc:MGI:1929701]	-0.781264	6.73645	23.9707	9.78147e-07	9.3862e-06
ENSMUSG00000036894	74012	Rap2b	RAP2B, member of RAS oncogene family [Source:MGI Symbol;Acc:MGI:1921262]	1.78823	7.14766	23.9686	9.79191e-07	9.38982e-06
ENSMUSG00000098657	NA	Gm27675	predicted gene, 27675 [Source:MGI Symbol;Acc:MGI:5531057]	-1.42012	0.995238	23.9631	9.82002e-07	9.41035e-06
ENSMUSG00000100546	NA	Gm29483	predicted gene 29483 [Source:MGI Symbol;Acc:MGI:5580189]	2.34659	-0.143999	23.9344	9.96753e-07	9.5452e-06
ENSMUSG00000034731	380921	Dgkh	diacylglycerol kinase, eta [Source:MGI Symbol;Acc:MGI:2444188]	0.972809	5.07553	23.9185	1.005e-06	9.6176e-06
ENSMUSG00000001383	66492	Zmat2	zinc finger, matrin type 2 [Source:MGI Symbol;Acc:MGI:1913742]	0.814471	8.65443	23.9065	1.0113e-06	9.67129e-06
ENSMUSG00000057895	22646	Zfp105	zinc finger protein 105 [Source:MGI Symbol;Acc:MGI:1277119]	-1.40031	1.93738	23.9007	1.01438e-06	9.69414e-06
ENSMUSG00000026525	13603	Opn3	opsin 3 [Source:MGI Symbol;Acc:MGI:1338022]	1.58025	4.12139	23.8855	1.02238e-06	9.76405e-06
ENSMUSG00000071647	225898	Eml3	echinoderm microtubule associated protein like 3 [Source:MGI Symbol;Acc:MGI:2387612]	-1.15223	2.7089	23.8702	1.03053e-06	9.83514e-06
ENSMUSG00000041870	68420	Ankrd13a	ankyrin repeat domain 13a [Source:MGI Symbol;Acc:MGI:1915670]	-1.26263	3.46277	23.8225	1.05638e-06	1.0075e-05
ENSMUSG00000023067	12575	Cdkn1a	cyclin-dependent kinase inhibitor 1A (P21) [Source:MGI Symbol;Acc:MGI:104556]	1.32322	4.66713	23.8022	1.06761e-06	1.01752e-05
ENSMUSG00000050592	241303	Fam78a	family with sequence similarity 78, member A [Source:MGI Symbol;Acc:MGI:2443569]	-1.2442	1.41037	23.7982	1.06985e-06	1.01897e-05
ENSMUSG00000059327	13607	Eda	ectodysplasin-A [Source:MGI Symbol;Acc:MGI:1195272]	1.07648	2.42804	23.7877	1.0757e-06	1.02384e-05
ENSMUSG00000044172	68509	Ptx4	pentraxin 4 [Source:MGI Symbol;Acc:MGI:1915759]	3.74099	-0.335271	23.7602	1.09118e-06	1.03788e-05
ENSMUSG00000044328	216964	Trp53i13	transformation related protein 53 inducible protein 13 [Source:MGI Symbol;Acc:MGI:1915125]	-1.61314	0.66827	23.7209	1.11366e-06	1.05854e-05
ENSMUSG00000067860	22773	Zic3	zinc finger protein of the cerebellum 3 [Source:MGI Symbol;Acc:MGI:106676]	-2.68562	1.00392	23.6975	1.12729e-06	1.07078e-05
ENSMUSG00000025474	74237	Tubgcp2	tubulin, gamma complex associated protein 2 [Source:MGI Symbol;Acc:MGI:1921487]	0.894043	5.20469	23.6757	1.14011e-06	1.08222e-05
ENSMUSG00000073422	14979	H2-Ke6	H2-K region expressed gene 6 [Source:MGI Symbol;Acc:MGI:95911]	-1.92762	-0.410279	23.6735	1.14146e-06	1.08277e-05
ENSMUSG00000048007	30058	Timm8a1	translocase of inner mitochondrial membrane 8A1 [Source:MGI Symbol;Acc:MGI:1353433]	-1.56877	1.14103	23.6707	1.1431e-06	1.0836e-05
ENSMUSG00000047261	14432	Gap43	growth associated protein 43 [Source:MGI Symbol;Acc:MGI:95639]	0.970806	8.43042	23.655	1.15247e-06	1.09174e-05
ENSMUSG00000062761	269639	Zfp512	zinc finger protein 512 [Source:MGI Symbol;Acc:MGI:1917345]	-0.796212	4.44174	23.6501	1.15543e-06	1.09381e-05
ENSMUSG00000034591	338365	Slc41a2	solute carrier family 41, member 2 [Source:MGI Symbol;Acc:MGI:2442940]	1.05623	4.70024	23.638	1.16272e-06	1.09996e-05
ENSMUSG00000026721	29809	Rabgap1l	RAB GTPase activating protein 1-like [Source:MGI Symbol;Acc:MGI:1352507]	0.750112	6.41368	23.6301	1.16747e-06	1.10305e-05
ENSMUSG00000045877	NA	4933415A04Rik	RIKEN cDNA 4933415A04 gene [Source:MGI Symbol;Acc:MGI:1922977]	1.96421	2.7178	23.63	1.16755e-06	1.10305e-05
ENSMUSG00000007867	76411	Ift43	intraflagellar transport 43 [Source:MGI Symbol;Acc:MGI:1923661]	-0.7967	3.21854	23.6204	1.17338e-06	1.10782e-05
ENSMUSG00000033676	14402	Gabrb3	gamma-aminobutyric acid (GABA) A receptor, subunit beta 3 [Source:MGI Symbol;Acc:MGI:95621]	0.829385	8.23417	23.6137	1.17749e-06	1.11095e-05
ENSMUSG00000022231	20356	Sema5a	sema domain, seven thrombospondin repeats (type 1 and type 1-like), transmembrane domain (TM) and short cytoplasmic domain, (semaphorin) 5A [Source:MGI Symbol;Acc:MGI:107556]	-0.900793	6.59589	23.592	1.19084e-06	1.12279e-05
ENSMUSG00000020435	74309	Osbp2	oxysterol binding protein 2 [Source:MGI Symbol;Acc:MGI:1921559]	0.847741	3.54974	23.5671	1.20635e-06	1.13666e-05
ENSMUSG00000036528	19024	Ppfibp2	PTPRF interacting protein, binding protein 2 (liprin beta 2) [Source:MGI Symbol;Acc:MGI:894649]	1.22799	2.92342	23.5632	1.20875e-06	1.13815e-05
ENSMUSG00000039358	13492	Drd5	dopamine receptor D5 [Source:MGI Symbol;Acc:MGI:94927]	1.35212	2.45578	23.5484	1.21811e-06	1.1462e-05
ENSMUSG00000035095	219148	Fam167a	family with sequence similarity 167, member A [Source:MGI Symbol;Acc:MGI:3606565]	-2.89949	0.223255	23.4971	1.25103e-06	1.17638e-05
ENSMUSG00000031517	234267	Gpm6a	glycoprotein m6a [Source:MGI Symbol;Acc:MGI:107671]	1.03633	11.7766	23.4948	1.25252e-06	1.177e-05
ENSMUSG00000044017	243277	Adgrd1	adhesion G protein-coupled receptor D1 [Source:MGI Symbol;Acc:MGI:3041203]	1.68604	2.60933	23.4769	1.26423e-06	1.18721e-05
ENSMUSG00000018398	20362	2018-09-08	septin 8 [Source:MGI Symbol;Acc:MGI:894310]	0.800616	7.55496	23.4551	1.27861e-06	1.19991e-05
ENSMUSG00000022715	74720	Tmem114	transmembrane protein 114 [Source:MGI Symbol;Acc:MGI:1921970]	1.60033	1.4537	23.4366	1.29098e-06	1.21072e-05
ENSMUSG00000042121	231637	Ssh1	slingshot homolog 1 (Drosophila) [Source:MGI Symbol;Acc:MGI:2686240]	-0.712206	4.3981	23.4255	1.29849e-06	1.21662e-05
ENSMUSG00000040563	235044	Plppr2	phospholipid phosphatase related 2 [Source:MGI Symbol;Acc:MGI:2384575]	0.908076	5.83501	23.4247	1.29901e-06	1.21662e-05
ENSMUSG00000025521	73067	Tmem192	transmembrane protein 192 [Source:MGI Symbol;Acc:MGI:1920317]	-0.736361	3.66411	23.4054	1.31211e-06	1.22807e-05
ENSMUSG00000056367	242894	Actr3b	ARP3 actin-related protein 3B [Source:MGI Symbol;Acc:MGI:2661120]	0.819787	6.59124	23.3655	1.33958e-06	1.25295e-05
ENSMUSG00000030697	56420	Ppp4c	protein phosphatase 4, catalytic subunit [Source:MGI Symbol;Acc:MGI:1891763]	-0.753139	4.00148	23.3608	1.34289e-06	1.25521e-05
ENSMUSG00000024261	20983	Syt4	synaptotagmin IV [Source:MGI Symbol;Acc:MGI:101759]	1.26753	9.14367	23.2985	1.38707e-06	1.29564e-05
ENSMUSG00000074227	20733	Spint2	serine protease inhibitor, Kunitz type 2 [Source:MGI Symbol;Acc:MGI:1338031]	1.17416	4.84323	23.2875	1.39503e-06	1.30221e-05
ENSMUSG00000059248	53860	2018-09-09	septin 9 [Source:MGI Symbol;Acc:MGI:1858222]	1.11167	5.06875	23.2826	1.3986e-06	1.30468e-05
ENSMUSG00000025384	71885	Faap100	Fanconi anemia core complex associated protein 100 [Source:MGI Symbol;Acc:MGI:1919135]	-1.01319	3.00567	23.266	1.41074e-06	1.31514e-05
ENSMUSG00000071567	NA	A830039N20Rik	RIKEN cDNA A830039N20 gene [Source:MGI Symbol;Acc:MGI:2445176]	0.87572	6.81714	23.2436	1.42728e-06	1.32967e-05
ENSMUSG00000072662	545893	Mansc4	MANSC domain containing 4 [Source:MGI Symbol;Acc:MGI:3645619]	-2.11646	-0.252864	23.2363	1.43267e-06	1.33381e-05
ENSMUSG00000062421	11841	Arf2	ADP-ribosylation factor 2 [Source:MGI Symbol;Acc:MGI:99595]	0.48822	5.94489	23.2263	1.44016e-06	1.33987e-05
ENSMUSG00000049313	20660	Sorl1	sortilin-related receptor, LDLR class A repeats-containing [Source:MGI Symbol;Acc:MGI:1202296]	1.28535	9.05601	23.225	1.44109e-06	1.33987e-05
ENSMUSG00000006205	56213	Htra1	HtrA serine peptidase 1 [Source:MGI Symbol;Acc:MGI:1929076]	-1.52053	7.82254	23.199	1.46076e-06	1.35726e-05
ENSMUSG00000023092	14199	Fhl1	four and a half LIM domains 1 [Source:MGI Symbol;Acc:MGI:1298387]	-0.636557	6.5149	23.161	1.48989e-06	1.38246e-05
ENSMUSG00000026668	68527	Ucma	upper zone of growth plate and cartilage matrix associated [Source:MGI Symbol;Acc:MGI:1915777]	2.144	0.690042	23.1599	1.49071e-06	1.38246e-05
ENSMUSG00000029306	15891	Ibsp	integrin binding sialoprotein [Source:MGI Symbol;Acc:MGI:96389]	2.42827	0.961827	23.1598	1.49083e-06	1.38246e-05
ENSMUSG00000057880	268860	Abat	4-aminobutyrate aminotransferase [Source:MGI Symbol;Acc:MGI:2443582]	-1.59166	8.44879	23.1451	1.50222e-06	1.3921e-05
ENSMUSG00000022041	110902	Chrna2	cholinergic receptor, nicotinic, alpha polypeptide 2 (neuronal) [Source:MGI Symbol;Acc:MGI:87886]	-2.28577	0.0694333	23.1065	1.53274e-06	1.41945e-05
ENSMUSG00000010554	67493	Mettl16	methyltransferase like 16 [Source:MGI Symbol;Acc:MGI:1914743]	-1.16895	4.17994	23.1017	1.53655e-06	1.42205e-05
ENSMUSG00000087336	NA	Gm15860	predicted gene 15860 [Source:MGI Symbol;Acc:MGI:3801778]	1.71152	0.529342	23.0993	1.53843e-06	1.42285e-05
ENSMUSG00000030579	22177	Tyrobp	TYRO protein tyrosine kinase binding protein [Source:MGI Symbol;Acc:MGI:1277211]	-1.84804	5.39161	23.0897	1.54613e-06	1.42903e-05
ENSMUSG00000036572	68134	Upf3b	UPF3 regulator of nonsense transcripts homolog B (yeast) [Source:MGI Symbol;Acc:MGI:1915384]	-0.655571	5.38644	23.0847	1.55022e-06	1.43186e-05
ENSMUSG00000045636	102103	Mtus1	mitochondrial tumor suppressor 1 [Source:MGI Symbol;Acc:MGI:2142572]	-0.870221	4.6505	23.0698	1.56222e-06	1.442e-05
ENSMUSG00000035403	241324	Crb2	crumbs family member 2 [Source:MGI Symbol;Acc:MGI:2679260]	1.45027	2.04538	23.0654	1.56586e-06	1.44441e-05
ENSMUSG00000050677	66717	Ccdc96	coiled-coil domain containing 96 [Source:MGI Symbol;Acc:MGI:1913967]	1.5374	0.524066	23.0437	1.58361e-06	1.45983e-05
ENSMUSG00000062151	208898	Unc13c	unc-13 homolog C (C. elegans) [Source:MGI Symbol;Acc:MGI:2149021]	-1.51923	6.30517	23.0412	1.58566e-06	1.46076e-05
ENSMUSG00000097730	NA	Gm26588	predicted gene, 26588 [Source:MGI Symbol;Acc:MGI:5477082]	-1.63389	1.59009	23.0194	1.60379e-06	1.47649e-05
ENSMUSG00000040151	23908	Hs2st1	heparan sulfate 2-O-sulfotransferase 1 [Source:MGI Symbol;Acc:MGI:1346049]	0.805242	6.16623	23.0136	1.60862e-06	1.47997e-05
ENSMUSG00000033880	19039	Lgals3bp	lectin, galactoside-binding, soluble, 3 binding protein [Source:MGI Symbol;Acc:MGI:99554]	1.19333	4.07901	23.0038	1.61682e-06	1.48655e-05
ENSMUSG00000053310	64011	Nrgn	neurogranin [Source:MGI Symbol;Acc:MGI:1927184]	1.08254	8.84262	23.0017	1.61858e-06	1.48719e-05
ENSMUSG00000086022	209550	Rad51ap2	RAD51 associated protein 2 [Source:MGI Symbol;Acc:MGI:3644580]	1.9391	0.639181	22.9912	1.62745e-06	1.49436e-05
ENSMUSG00000044067	73010	Gpr22	G protein-coupled receptor 22 [Source:MGI Symbol;Acc:MGI:1920260]	0.973549	7.16018	22.9737	1.64235e-06	1.50706e-05
ENSMUSG00000029917	243407	C130060K24Rik	RIKEN cDNA C130060K24 gene [Source:MGI Symbol;Acc:MGI:2441881]	-2.88618	-0.390334	22.9663	1.64863e-06	1.51183e-05
ENSMUSG00000030782	21804	Tgfb1i1	transforming growth factor beta 1 induced transcript 1 [Source:MGI Symbol;Acc:MGI:102784]	1.07985	4.20597	22.9535	1.65968e-06	1.52098e-05
ENSMUSG00000031642	59009	Sh3rf1	SH3 domain containing ring finger 1 [Source:MGI Symbol;Acc:MGI:1913066]	1.06057	5.73132	22.9436	1.66822e-06	1.52781e-05
ENSMUSG00000018362	16647	Kpna2	karyopherin (importin) alpha 2 [Source:MGI Symbol;Acc:MGI:103561]	1.68979	0.94151	22.9373	1.67371e-06	1.53183e-05
ENSMUSG00000033220	19354	Rac2	RAS-related C3 botulinum substrate 2 [Source:MGI Symbol;Acc:MGI:97846]	-1.72033	3.39531	22.9253	1.68419e-06	1.54042e-05
ENSMUSG00000024944	56327	Arl2	ADP-ribosylation factor-like 2 [Source:MGI Symbol;Acc:MGI:1928393]	-0.658925	6.0664	22.9137	1.69444e-06	1.54879e-05
ENSMUSG00000014932	22612	Yes1	YES proto-oncogene 1, Src family tyrosine kinase [Source:MGI Symbol;Acc:MGI:99147]	-1.89726	3.19993	22.8634	1.73934e-06	1.5888e-05
ENSMUSG00000002812	14248	Flii	flightless I actin binding protein [Source:MGI Symbol;Acc:MGI:1342286]	-0.955688	4.34416	22.8316	1.76832e-06	1.61422e-05
ENSMUSG00000032878	216613	Ccdc85a	coiled-coil domain containing 85A [Source:MGI Symbol;Acc:MGI:2445069]	0.93058	5.31094	22.8246	1.77475e-06	1.61905e-05
ENSMUSG00000036353	70839	P2ry12	purinergic receptor P2Y, G-protein coupled 12 [Source:MGI Symbol;Acc:MGI:1918089]	-1.94659	5.93035	22.8166	1.7822e-06	1.62478e-05
ENSMUSG00000036492	386454	Rnf39	ring finger protein 39 [Source:MGI Symbol;Acc:MGI:2156378]	1.33758	0.69229	22.815	1.78369e-06	1.62509e-05
ENSMUSG00000097209	NA	AU022754	expressed sequence AU022754 [Source:MGI Symbol;Acc:MGI:2146143]	2.07088	-0.113228	22.7656	1.83011e-06	1.6663e-05
ENSMUSG00000097734	NA	B930082K07Rik	RIKEN cDNA B930082K07 gene [Source:MGI Symbol;Acc:MGI:2445108]	1.23663	1.68739	22.7459	1.84896e-06	1.68238e-05
ENSMUSG00000021171	52635	Esyt2	extended synaptotagmin-like protein 2 [Source:MGI Symbol;Acc:MGI:1261845]	0.872468	4.70928	22.7343	1.86019e-06	1.69149e-05
ENSMUSG00000034902	18717	Pip5k1c	phosphatidylinositol-4-phosphate 5-kinase, type 1 gamma [Source:MGI Symbol;Acc:MGI:1298224]	0.629168	7.75007	22.6915	1.90204e-06	1.72844e-05
ENSMUSG00000021760	69590	Gpx8	glutathione peroxidase 8 (putative) [Source:MGI Symbol;Acc:MGI:1916840]	-1.70103	3.75832	22.6869	1.90667e-06	1.73152e-05
ENSMUSG00000087362	NA	Gm13710	predicted gene 13710 [Source:MGI Symbol;Acc:MGI:3650894]	2.03552	0.031855	22.5813	2.01438e-06	1.82745e-05
ENSMUSG00000048481	232934	Mypop	Myb-related transcription factor, partner of profilin [Source:MGI Symbol;Acc:MGI:2446472]	-0.984801	3.62189	22.5808	2.0149e-06	1.82745e-05
ENSMUSG00000033713	71375	Foxn3	forkhead box N3 [Source:MGI Symbol;Acc:MGI:1918625]	-1.15878	6.45273	22.5775	2.01837e-06	1.82942e-05
ENSMUSG00000040009	14687	Gnaz	guanine nucleotide binding protein, alpha z subunit [Source:MGI Symbol;Acc:MGI:95780]	0.691514	5.09513	22.5528	2.04442e-06	1.85183e-05
ENSMUSG00000062190	71835	Lancl2	LanC (bacterial lantibiotic synthetase component C)-like 2 [Source:MGI Symbol;Acc:MGI:1919085]	0.812339	6.39511	22.5324	2.06633e-06	1.87047e-05
ENSMUSG00000028518	108079	Prkaa2	protein kinase, AMP-activated, alpha 2 catalytic subunit [Source:MGI Symbol;Acc:MGI:1336173]	0.826438	5.33491	22.5218	2.07775e-06	1.8796e-05
ENSMUSG00000041324	16323	Inhba	inhibin beta-A [Source:MGI Symbol;Acc:MGI:96570]	-1.4646	3.44383	22.5019	2.09935e-06	1.89792e-05
ENSMUSG00000061411	329540	Nol4l	nucleolar protein 4-like [Source:MGI Symbol;Acc:MGI:1918765]	0.67389	5.52749	22.4931	2.109e-06	1.90542e-05
ENSMUSG00000087084	NA	Gm13016	predicted gene 13016 [Source:MGI Symbol;Acc:MGI:3650527]	1.75235	0.145157	22.4911	2.11122e-06	1.9062e-05
ENSMUSG00000029402	76167	Snrnp35	small nuclear ribonucleoprotein 35 (U11/U12) [Source:MGI Symbol;Acc:MGI:1923417]	-0.875815	2.71123	22.4783	2.12528e-06	1.91766e-05
ENSMUSG00000034402	238271	Kcnh5	potassium voltage-gated channel, subfamily H (eag-related), member 5 [Source:MGI Symbol;Acc:MGI:3584508]	1.30229	3.44951	22.4732	2.13095e-06	1.92155e-05
ENSMUSG00000029363	72151	Rfc5	replication factor C (activator 1) 5 [Source:MGI Symbol;Acc:MGI:1919401]	0.765661	3.68599	22.4445	2.16302e-06	1.94921e-05
ENSMUSG00000096943	NA	Gm26721	predicted gene, 26721 [Source:MGI Symbol;Acc:MGI:5477215]	1.16507	2.34609	22.4375	2.17091e-06	1.95501e-05
ENSMUSG00000066637	75516	Ttc32	tetratricopeptide repeat domain 32 [Source:MGI Symbol;Acc:MGI:1922766]	-1.43867	0.611081	22.4364	2.17223e-06	1.95501e-05
ENSMUSG00000028699	66805	Tspan1	tetraspanin 1 [Source:MGI Symbol;Acc:MGI:1914055]	2.38447	-0.637296	22.3934	2.22132e-06	1.99791e-05
ENSMUSG00000036941	114615	Elac1	elaC ribonuclease Z 1 [Source:MGI Symbol;Acc:MGI:1890495]	-0.669922	4.41776	22.3882	2.22733e-06	2.00203e-05
ENSMUSG00000090799	546611	Klhl33	kelch-like 33 [Source:MGI Symbol;Acc:MGI:3644593]	-2.05781	-0.348468	22.386	2.22988e-06	2.00305e-05
ENSMUSG00000035585	66078	Tsen34	tRNA splicing endonuclease subunit 34 [Source:MGI Symbol;Acc:MGI:1913328]	-0.988777	4.29145	22.3537	2.26782e-06	2.03582e-05
ENSMUSG00000062054	67732	Iah1	isoamyl acetate-hydrolyzing esterase 1 homolog [Source:MGI Symbol;Acc:MGI:1914982]	-0.726947	4.24107	22.3436	2.27968e-06	2.04516e-05
ENSMUSG00000053110	22601	Yap1	yes-associated protein 1 [Source:MGI Symbol;Acc:MGI:103262]	1.34917	3.79082	22.3292	2.29684e-06	2.05925e-05
ENSMUSG00000003363	18807	Pld3	phospholipase D family, member 3 [Source:MGI Symbol;Acc:MGI:1333782]	1.35946	10.1541	22.3248	2.30217e-06	2.06271e-05
ENSMUSG00000036972	22774	Zic4	zinc finger protein of the cerebellum 4 [Source:MGI Symbol;Acc:MGI:107201]	-1.91283	1.76701	22.3154	2.31347e-06	2.07151e-05
ENSMUSG00000057060	210027	Slc35f3	solute carrier family 35, member F3 [Source:MGI Symbol;Acc:MGI:2444426]	-0.914344	3.67103	22.31	2.31991e-06	2.07596e-05
ENSMUSG00000063897	236082	DHRSX	dehydrogenase/reductase SDR family member on chromosome X homolog [Source:RefSeq peptide;Acc:NP_001028498]	-1.07215	1.77318	22.3081	2.32229e-06	2.07668e-05
ENSMUSG00000064125	73072	Prr36	proline rich 36 [Source:MGI Symbol;Acc:MGI:3605626]	0.850544	4.03064	22.3069	2.32367e-06	2.07668e-05
ENSMUSG00000040282	399568	BC052040	cDNA sequence BC052040 [Source:MGI Symbol;Acc:MGI:3026886]	-1.04543	2.59088	22.2757	2.3617e-06	2.10933e-05
ENSMUSG00000021587	18548	Pcsk1	proprotein convertase subtilisin/kexin type 1 [Source:MGI Symbol;Acc:MGI:97511]	1.72673	4.26081	22.273	2.36507e-06	2.11099e-05
ENSMUSG00000023094	76467	Msrb2	methionine sulfoxide reductase B2 [Source:MGI Symbol;Acc:MGI:1923717]	0.702908	4.58354	22.2611	2.37984e-06	2.12283e-05
ENSMUSG00000022306	22762	Zfpm2	zinc finger protein, multitype 2 [Source:MGI Symbol;Acc:MGI:1334444]	0.900156	3.97681	22.2467	2.39766e-06	2.13737e-05
ENSMUSG00000055128	68755	Cgrrf1	cell growth regulator with ring finger domain 1 [Source:MGI Symbol;Acc:MGI:1916368]	-0.747003	4.39402	22.227	2.42247e-06	2.15632e-05
ENSMUSG00000032869	228769	Psmf1	proteasome (prosome, macropain) inhibitor subunit 1 [Source:MGI Symbol;Acc:MGI:1346072]	0.719624	6.08386	22.2262	2.42349e-06	2.15632e-05
ENSMUSG00000030075	18488	Cntn3	contactin 3 [Source:MGI Symbol;Acc:MGI:99534]	1.08012	5.05512	22.2261	2.42352e-06	2.15632e-05
ENSMUSG00000042272	228071	Sestd1	SEC14 and spectrin domains 1 [Source:MGI Symbol;Acc:MGI:1916262]	0.815198	5.6057	22.2094	2.4447e-06	2.17379e-05
ENSMUSG00000028222	12307	Calb1	calbindin 1 [Source:MGI Symbol;Acc:MGI:88248]	-1.32701	7.57374	22.2038	2.4519e-06	2.17881e-05
ENSMUSG00000018965	22629	Ywhah	tyrosine 3-monooxygenase/tryptophan 5-monooxygenase activation protein, eta polypeptide [Source:MGI Symbol;Acc:MGI:109194]	1.01537	8.22159	22.1912	2.46802e-06	2.19175e-05
ENSMUSG00000059363	14297	Fxn	frataxin [Source:MGI Symbol;Acc:MGI:1096879]	-1.02669	1.86762	22.1876	2.4726e-06	2.19443e-05
ENSMUSG00000068742	12953	Cry2	cryptochrome 2 (photolyase-like) [Source:MGI Symbol;Acc:MGI:1270859]	0.641238	6.56411	22.1805	2.48185e-06	2.20125e-05
ENSMUSG00000039529	54670	Atp8b1	ATPase, class I, type 8B, member 1 [Source:MGI Symbol;Acc:MGI:1859665]	2.09578	0.796521	22.1719	2.49298e-06	2.20973e-05
ENSMUSG00000039206	231871	Daglb	diacylglycerol lipase, beta [Source:MGI Symbol;Acc:MGI:2442032]	0.816233	5.93594	22.1201	2.56117e-06	2.26874e-05
ENSMUSG00000097068	NA	Gm26760	predicted gene, 26760 [Source:MGI Symbol;Acc:MGI:5477254]	-2.21906	0.477036	22.1055	2.5807e-06	2.2846e-05
ENSMUSG00000021596	78771	Mctp1	multiple C2 domains, transmembrane 1 [Source:MGI Symbol;Acc:MGI:1926021]	-0.885944	6.36309	22.0934	2.59701e-06	2.2976e-05
ENSMUSG00000083674	NA	Zfp133-ps	zinc finger protein 133, pseudogene [Source:MGI Symbol;Acc:MGI:2176612]	-1.37563	1.59901	22.0732	2.62443e-06	2.32039e-05
ENSMUSG00000053819	108058	Camk2d	calcium/calmodulin-dependent protein kinase II, delta [Source:MGI Symbol;Acc:MGI:1341265]	0.863404	7.11263	22.0621	2.63976e-06	2.33248e-05
ENSMUSG00000042759	171504	Apobr	apolipoprotein B receptor [Source:MGI Symbol;Acc:MGI:2176230]	-2.80342	-0.272201	22.0451	2.66324e-06	2.35175e-05
ENSMUSG00000016552	239554	Foxred2	FAD-dependent oxidoreductase domain containing 2 [Source:MGI Symbol;Acc:MGI:106315]	-0.936042	4.08282	21.9924	2.73737e-06	2.41569e-05
ENSMUSG00000027852	18176	Nras	neuroblastoma ras oncogene [Source:MGI Symbol;Acc:MGI:97376]	1.32643	8.27896	21.9818	2.75255e-06	2.42756e-05
ENSMUSG00000074782	NA	4833422C13Rik	RIKEN cDNA 4833422C13 gene [Source:MGI Symbol;Acc:MGI:3603826]	1.1432	2.13724	21.9603	2.78354e-06	2.45335e-05
ENSMUSG00000021200	65256	Asb2	ankyrin repeat and SOCS box-containing 2 [Source:MGI Symbol;Acc:MGI:1929743]	-1.41917	0.145319	21.9578	2.78717e-06	2.45501e-05
ENSMUSG00000051864	223754	Tbc1d22a	TBC1 domain family, member 22a [Source:MGI Symbol;Acc:MGI:1289265]	0.719168	4.38663	21.9357	2.81946e-06	2.4819e-05
ENSMUSG00000058897	77018	Col25a1	collagen, type XXV, alpha 1 [Source:MGI Symbol;Acc:MGI:1924268]	-1.0611	4.98638	21.9254	2.83454e-06	2.49362e-05
ENSMUSG00000016024	16803	Lbp	lipopolysaccharide binding protein [Source:MGI Symbol;Acc:MGI:1098776]	2.01662	2.26019	21.9169	2.84723e-06	2.50321e-05
ENSMUSG00000022449	223838	Adamts20	a disintegrin-like and metallopeptidase (reprolysin type) with thrombospondin type 1 motif, 20 [Source:MGI Symbol;Acc:MGI:2660628]	1.31351	2.66225	21.877	2.90704e-06	2.5542e-05
ENSMUSG00000056752	237806	Dnah9	dynein, axonemal, heavy chain 9 [Source:MGI Symbol;Acc:MGI:1289279]	1.4078	1.72525	21.8535	2.94279e-06	2.58399e-05
ENSMUSG00000040998	114249	Npnt	nephronectin [Source:MGI Symbol;Acc:MGI:2148811]	0.99268	5.98493	21.8504	2.94758e-06	2.58658e-05
ENSMUSG00000031360	55936	Ctps2	cytidine 5'-triphosphate synthase 2 [Source:MGI Symbol;Acc:MGI:1933185]	-0.783245	4.80738	21.8107	3.0091e-06	2.63892e-05
ENSMUSG00000002341	13004	Ncan	neurocan [Source:MGI Symbol;Acc:MGI:104694]	1.68787	11.0427	21.8011	3.02428e-06	2.65058e-05
ENSMUSG00000007850	59013	Hnrnph1	heterogeneous nuclear ribonucleoprotein H1 [Source:MGI Symbol;Acc:MGI:1891925]	-0.869187	6.50441	21.7858	3.04849e-06	2.67014e-05
ENSMUSG00000075316	20274	Scn9a	sodium channel, voltage-gated, type IX, alpha [Source:MGI Symbol;Acc:MGI:107636]	-1.58956	1.46183	21.7844	3.05072e-06	2.67042e-05
ENSMUSG00000022949	209195	Clic6	chloride intracellular channel 6 [Source:MGI Symbol;Acc:MGI:2146607]	-2.05683	2.09227	21.7803	3.05726e-06	2.67449e-05
ENSMUSG00000052087	51791	Rgs14	regulator of G-protein signaling 14 [Source:MGI Symbol;Acc:MGI:1859709]	0.939109	4.74983	21.7635	3.08412e-06	2.6963e-05
ENSMUSG00000096956	NA	Snhg18	small nucleolar RNA host gene 18 [Source:MGI Symbol;Acc:MGI:1914085]	-1.67641	1.15117	21.752	3.10269e-06	2.71085e-05
ENSMUSG00000027524	13616	Edn3	endothelin 3 [Source:MGI Symbol;Acc:MGI:95285]	-2.65111	0.599148	21.748	3.10916e-06	2.71482e-05
ENSMUSG00000041773	13803	Enc1	ectodermal-neural cortex 1 [Source:MGI Symbol;Acc:MGI:109610]	1.24699	8.85023	21.7442	3.11535e-06	2.71854e-05
ENSMUSG00000025646	235610	Atrip	ATR interacting protein [Source:MGI Symbol;Acc:MGI:1925349]	0.880691	4.24666	21.7378	3.12574e-06	2.72591e-05
ENSMUSG00000037410	67016	Tbc1d2b	TBC1 domain family, member 2B [Source:MGI Symbol;Acc:MGI:1914266]	-0.88917	2.9494	21.7131	3.16629e-06	2.75956e-05
ENSMUSG00000036478	12226	Btg1	B cell translocation gene 1, anti-proliferative [Source:MGI Symbol;Acc:MGI:88215]	-0.797044	4.77053	21.6748	3.23008e-06	2.81341e-05
ENSMUSG00000040713	433375	Creg1	cellular repressor of E1A-stimulated genes 1 [Source:MGI Symbol;Acc:MGI:1344382]	-0.848604	4.45669	21.6615	3.25248e-06	2.83117e-05
ENSMUSG00000020785	55984	Camkk1	calcium/calmodulin-dependent protein kinase kinase 1, alpha [Source:MGI Symbol;Acc:MGI:1891766]	0.815808	5.19144	21.6535	3.26619e-06	2.84134e-05
ENSMUSG00000026827	14571	Gpd2	glycerol phosphate dehydrogenase 2, mitochondrial [Source:MGI Symbol;Acc:MGI:99778]	1.08893	8.38116	21.6471	3.27702e-06	2.849e-05
ENSMUSG00000002897	16172	Il17ra	interleukin 17 receptor A [Source:MGI Symbol;Acc:MGI:107399]	1.35333	2.56417	21.6344	3.29882e-06	2.86618e-05
ENSMUSG00000047658	545276	Gal3st3	galactose-3-O-sulfotransferase 3 [Source:MGI Symbol;Acc:MGI:3617843]	0.981406	5.3953	21.6017	3.35557e-06	2.91369e-05
ENSMUSG00000022061	18095	Nkx3-1	NK-3 transcription factor, locus 1 (Drosophila) [Source:MGI Symbol;Acc:MGI:97352]	2.11256	0.437295	21.5608	3.42785e-06	2.97462e-05
ENSMUSG00000021552	56278	Gkap1	G kinase anchoring protein 1 [Source:MGI Symbol;Acc:MGI:1891694]	-1.18881	2.98422	21.5567	3.43526e-06	2.97838e-05
ENSMUSG00000033294	100608	Noc4l	NOC4 like [Source:MGI Symbol;Acc:MGI:2140843]	0.744039	4.59129	21.556	3.43643e-06	2.97838e-05
ENSMUSG00000097960	NA	A330074K22Rik	RIKEN cDNA A330074K22 gene [Source:MGI Symbol;Acc:MGI:3045392]	-2.1348	-0.534287	21.5501	3.44701e-06	2.98571e-05
ENSMUSG00000048349	18996	Pou4f1	POU domain, class 4, transcription factor 1 [Source:MGI Symbol;Acc:MGI:102525]	2.54638	1.01894	21.5481	3.45063e-06	2.98608e-05
ENSMUSG00000022512	12737	Cldn1	claudin 1 [Source:MGI Symbol;Acc:MGI:1276109]	-1.68731	2.44507	21.5475	3.45168e-06	2.98608e-05
ENSMUSG00000045312	218454	Lhfpl2	lipoma HMGIC fusion partner-like 2 [Source:MGI Symbol;Acc:MGI:2145236]	1.09002	3.69124	21.4896	3.55755e-06	3.07577e-05
ENSMUSG00000078350	68859	Smim1	small integral membrane protein 1 [Source:MGI Symbol;Acc:MGI:1916109]	-1.45169	1.80563	21.4858	3.56455e-06	3.07975e-05
ENSMUSG00000026049	75623	Tex30	testis expressed 30 [Source:MGI Symbol;Acc:MGI:1922873]	1.36385	3.55359	21.4847	3.56654e-06	3.07975e-05
ENSMUSG00000027087	16410	Itgav	integrin alpha V [Source:MGI Symbol;Acc:MGI:96608]	1.17686	6.65092	21.4816	3.57243e-06	3.08295e-05
ENSMUSG00000059852	240444	Kcng2	potassium voltage-gated channel, subfamily G, member 2 [Source:MGI Symbol;Acc:MGI:3694646]	1.28595	2.01426	21.4682	3.59741e-06	3.1026e-05
ENSMUSG00000047496	320311	Rnf152	ring finger protein 152 [Source:MGI Symbol;Acc:MGI:2443787]	-0.728636	4.12154	21.4604	3.61219e-06	3.11343e-05
ENSMUSG00000068523	14707	Gng5	guanine nucleotide binding protein (G protein), gamma 5 [Source:MGI Symbol;Acc:MGI:109164]	-1.36868	3.22121	21.413	3.70259e-06	3.18914e-05
ENSMUSG00000029452	77462	Tmem116	transmembrane protein 116 [Source:MGI Symbol;Acc:MGI:1924712]	1.28857	2.47562	21.4119	3.70456e-06	3.18914e-05
ENSMUSG00000085058	NA	8030453O22Rik	RIKEN cDNA 8030453O22 gene [Source:MGI Symbol;Acc:MGI:1924459]	1.12128	2.1376	21.384	3.75886e-06	3.23391e-05
ENSMUSG00000038872	11906	Zfhx3	zinc finger homeobox 3 [Source:MGI Symbol;Acc:MGI:99948]	-1.45081	4.20463	21.3569	3.81248e-06	3.27803e-05
ENSMUSG00000037111	73251	Setd7	SET domain containing (lysine methyltransferase) 7 [Source:MGI Symbol;Acc:MGI:1920501]	-1.28758	5.80916	21.3474	3.8313e-06	3.29221e-05
ENSMUSG00000034459	15957	Ifit1	interferon-induced protein with tetratricopeptide repeats 1 [Source:MGI Symbol;Acc:MGI:99450]	-2.24191	1.54455	21.3403	3.84564e-06	3.30143e-05
ENSMUSG00000040717	171463	Il17rd	interleukin 17 receptor D [Source:MGI Symbol;Acc:MGI:2159727]	1.7571	1.25418	21.3397	3.84674e-06	3.30143e-05
ENSMUSG00000022895	23872	Ets2	E26 avian leukemia oncogene 2, 3' domain [Source:MGI Symbol;Acc:MGI:95456]	0.914559	5.3988	21.3095	3.90784e-06	3.35137e-05
ENSMUSG00000053553	73212	3110082I17Rik	RIKEN cDNA 3110082I17 gene [Source:MGI Symbol;Acc:MGI:1920462]	1.19922	2.05392	21.3075	3.91207e-06	3.35137e-05
ENSMUSG00000074738	230991	Fndc10	fibronectin type III domain containing 10 [Source:MGI Symbol;Acc:MGI:2444790]	-0.822973	3.79851	21.3075	3.91207e-06	3.35137e-05
ENSMUSG00000020701	270893	Tmem132e	transmembrane protein 132E [Source:MGI Symbol;Acc:MGI:2685490]	-1.47718	2.22481	21.3038	3.91953e-06	3.35571e-05
ENSMUSG00000046442	320472	Ppm1e	protein phosphatase 1E (PP2C domain containing) [Source:MGI Symbol;Acc:MGI:2444096]	0.769813	6.85221	21.2883	3.9513e-06	3.38085e-05
ENSMUSG00000032478	54369	Nme6	NME/NM23 nucleoside diphosphate kinase 6 [Source:MGI Symbol;Acc:MGI:1861676]	-0.999332	3.09243	21.275	3.97889e-06	3.40238e-05
ENSMUSG00000027074	58207	Slc43a3	solute carrier family 43, member 3 [Source:MGI Symbol;Acc:MGI:1931054]	2.46176	0.37279	21.2433	4.04529e-06	3.45706e-05
ENSMUSG00000060314	407812	Zfp941	zinc finger protein 941 [Source:MGI Symbol;Acc:MGI:3039601]	-1.10301	4.73108	21.2377	4.05704e-06	3.465e-05
ENSMUSG00000020483	68097	Dynll2	dynein light chain LC8-type 2 [Source:MGI Symbol;Acc:MGI:1915347]	-1.14311	7.85183	21.214	4.10746e-06	3.50593e-05
ENSMUSG00000001707	66143	Eef1e1	eukaryotic translation elongation factor 1 epsilon 1 [Source:MGI Symbol;Acc:MGI:1913393]	-0.952605	5.83739	21.2022	4.1328e-06	3.52542e-05
ENSMUSG00000087200	NA	Lrp8os3	low density lipoprotein receptor-related protein 8, apolipoprotein e receptor, opposite strand 3 [Source:MGI Symbol;Acc:MGI:3651133]	-1.45882	0.538209	21.1833	4.17383e-06	3.55826e-05
ENSMUSG00000041959	20194	S100a10	S100 calcium binding protein A10 (calpactin) [Source:MGI Symbol;Acc:MGI:1339468]	1.09794	5.20601	21.1719	4.19881e-06	3.57739e-05
ENSMUSG00000053641	102442	Dennd4a	DENN/MADD domain containing 4A [Source:MGI Symbol;Acc:MGI:2142979]	0.632057	5.37918	21.1642	4.21574e-06	3.58964e-05
ENSMUSG00000054556	NA	Gm4876	predicted gene 4876 [Source:MGI Symbol;Acc:MGI:3647654]	1.92662	2.60223	21.1443	4.25964e-06	3.62482e-05
ENSMUSG00000037999	212285	Arap2	ArfGAP with RhoGAP domain, ankyrin repeat and PH domain 2 [Source:MGI Symbol;Acc:MGI:2684416]	0.871155	6.24532	21.1178	4.31887e-06	3.673e-05
ENSMUSG00000097697	NA	4833412C05Rik	RIKEN cDNA 4833412C05 gene [Source:MGI Symbol;Acc:MGI:1921154]	1.53828	1.39225	21.0819	4.4007e-06	3.74033e-05
ENSMUSG00000036473	18209	Tbc1d24	TBC1 domain family, member 24 [Source:MGI Symbol;Acc:MGI:2443456]	0.711705	5.92914	21.0763	4.41349e-06	3.74893e-05
ENSMUSG00000030532	68695	Hddc3	HD domain containing 3 [Source:MGI Symbol;Acc:MGI:1915945]	-0.936437	3.86233	21.0671	4.43485e-06	3.7648e-05
ENSMUSG00000043415	71198	Otud1	OTU domain containing 1 [Source:MGI Symbol;Acc:MGI:1918448]	0.974086	4.3925	21.0657	4.43793e-06	3.76514e-05
ENSMUSG00000021133	217684	Susd6	sushi domain containing 6 [Source:MGI Symbol;Acc:MGI:2444661]	0.708338	4.94917	21.0485	4.47805e-06	3.79689e-05
ENSMUSG00000023232	230779	Serinc2	serine incorporator 2 [Source:MGI Symbol;Acc:MGI:1919132]	1.92108	2.25151	21.0449	4.48638e-06	3.80105e-05
ENSMUSG00000039680	121022	Mrps6	mitochondrial ribosomal protein S6 [Source:MGI Symbol;Acc:MGI:2153111]	-1.02253	4.71447	21.0441	4.48836e-06	3.80105e-05
ENSMUSG00000018199	20822	Trove2	TROVE domain family, member 2 [Source:MGI Symbol;Acc:MGI:106652]	-0.881432	6.29377	21.0244	4.53468e-06	3.83796e-05
ENSMUSG00000073434	106618	Wdr90	WD repeat domain 90 [Source:MGI Symbol;Acc:MGI:1921267]	1.46634	3.59483	21.0065	4.57723e-06	3.87064e-05
ENSMUSG00000078612	242594	1700024P16Rik	RIKEN cDNA 1700024P16 gene [Source:MGI Symbol;Acc:MGI:2685466]	2.32422	0.946661	21.0059	4.5788e-06	3.87064e-05
ENSMUSG00000085133	NA	B930095G15Rik	RIKEN cDNA B930095G15 gene [Source:MGI Symbol;Acc:MGI:2443701]	1.71499	7.8039	20.9931	4.60951e-06	3.89426e-05
ENSMUSG00000032382	56440	Snx1	sorting nexin 1 [Source:MGI Symbol;Acc:MGI:1928395]	-0.692545	5.77672	20.9876	4.62277e-06	3.90311e-05
ENSMUSG00000026344	72585	Lypd1	Ly6/Plaur domain containing 1 [Source:MGI Symbol;Acc:MGI:1919835]	0.904463	5.83794	20.9848	4.62936e-06	3.90634e-05
ENSMUSG00000019865	18101	Nmbr	neuromedin B receptor [Source:MGI Symbol;Acc:MGI:1100525]	-1.88368	1.51243	20.983	4.63371e-06	3.90766e-05
ENSMUSG00000013766	70274	Ly6g6e	lymphocyte antigen 6 complex, locus G6E [Source:MGI Symbol;Acc:MGI:1917524]	1.75075	2.19685	20.9751	4.65281e-06	3.92141e-05
ENSMUSG00000041130	213753	Zfp598	zinc finger protein 598 [Source:MGI Symbol;Acc:MGI:2670965]	-0.800145	2.82453	20.9627	4.68321e-06	3.94467e-05
ENSMUSG00000021943	14560	Gdf10	growth differentiation factor 10 [Source:MGI Symbol;Acc:MGI:95684]	-1.26736	3.29486	20.9532	4.70629e-06	3.96174e-05
ENSMUSG00000041762	68526	Gpr155	G protein-coupled receptor 155 [Source:MGI Symbol;Acc:MGI:1915776]	-0.918568	5.34802	20.9176	4.79459e-06	4.03365e-05
ENSMUSG00000021241	74316	Isca2	iron-sulfur cluster assembly 2 [Source:MGI Symbol;Acc:MGI:1921566]	-1.07633	6.27878	20.8918	4.85969e-06	4.08597e-05
ENSMUSG00000021012	75553	Zc3h14	zinc finger CCCH type containing 14 [Source:MGI Symbol;Acc:MGI:1919824]	0.605355	4.98131	20.8866	4.87299e-06	4.09431e-05
ENSMUSG00000028187	70285	Rpf1	ribosome production factor 1 homolog [Source:MGI Symbol;Acc:MGI:1917535]	-0.814324	3.33629	20.8856	4.87542e-06	4.09431e-05
ENSMUSG00000038982	17828	Bloc1s5	biogenesis of lysosomal organelles complex-1, subunit 5, muted [Source:MGI Symbol;Acc:MGI:2178598]	-0.994473	3.58553	20.8811	4.88697e-06	4.10156e-05
ENSMUSG00000007655	12389	Cav1	caveolin 1, caveolae protein [Source:MGI Symbol;Acc:MGI:102709]	1.6217	3.86199	20.8498	4.96738e-06	4.16656e-05
ENSMUSG00000036158	106042	Prickle1	prickle planar cell polarity protein 1 [Source:MGI Symbol;Acc:MGI:1916034]	0.81051	6.21135	20.8076	5.07815e-06	4.25553e-05
ENSMUSG00000029596	257635	Sdsl	serine dehydratase-like [Source:MGI Symbol;Acc:MGI:2182607]	-2.53263	-0.125422	20.8071	5.07951e-06	4.25553e-05
ENSMUSG00000095407	622645	Tmem200c	transmembrane protein 200C [Source:MGI Symbol;Acc:MGI:3646281]	1.29836	2.2486	20.8031	5.0901e-06	4.2595e-05
ENSMUSG00000032840	76792	2410131K14Rik	RIKEN cDNA 2410131K14 gene [Source:MGI Symbol;Acc:MGI:1924042]	-0.55468	4.71943	20.8022	5.09246e-06	4.2595e-05
ENSMUSG00000044707	380694	Ccnjl	cyclin J-like [Source:MGI Symbol;Acc:MGI:2685723]	0.906312	2.37602	20.8019	5.09334e-06	4.2595e-05
ENSMUSG00000022528	15205	Hes1	hairy and enhancer of split 1 (Drosophila) [Source:MGI Symbol;Acc:MGI:104853]	1.30298	3.7802	20.7958	5.10955e-06	4.27052e-05
ENSMUSG00000022309	11600	Angpt1	angiopoietin 1 [Source:MGI Symbol;Acc:MGI:108448]	1.36718	2.89624	20.7896	5.12599e-06	4.28171e-05
ENSMUSG00000006179	54373	Prss16	protease, serine 16 (thymus) [Source:MGI Symbol;Acc:MGI:1859181]	2.29895	-0.893817	20.7763	5.1618e-06	4.30906e-05
ENSMUSG00000072623	22750	Zfp9	zinc finger protein 9 [Source:MGI Symbol;Acc:MGI:99210]	0.967683	3.95888	20.7462	5.24344e-06	4.37252e-05
ENSMUSG00000053411	52609	Cbx7	chromobox 7 [Source:MGI Symbol;Acc:MGI:1196439]	-0.797677	3.79396	20.746	5.24404e-06	4.37252e-05
ENSMUSG00000038342	208104	Mlxip	MLX interacting protein [Source:MGI Symbol;Acc:MGI:2141183]	0.773301	3.95218	20.718	5.32144e-06	4.43443e-05
ENSMUSG00000040850	103554	Psme4	proteasome (prosome, macropain) activator subunit 4 [Source:MGI Symbol;Acc:MGI:2143994]	0.804773	5.88637	20.7123	5.33721e-06	4.44494e-05
ENSMUSG00000060166	27801	Zdhhc8	zinc finger, DHHC domain containing 8 [Source:MGI Symbol;Acc:MGI:1338012]	0.990824	5.14161	20.6655	5.46931e-06	4.55225e-05
ENSMUSG00000022587	17069	Ly6e	lymphocyte antigen 6 complex, locus E [Source:MGI Symbol;Acc:MGI:106651]	1.14026	8.58539	20.6508	5.51129e-06	4.58212e-05
ENSMUSG00000063200	70078	Nol7	nucleolar protein 7 [Source:MGI Symbol;Acc:MGI:1917328]	-0.894781	5.27183	20.6496	5.51482e-06	4.58212e-05
ENSMUSG00000055560	328274	Zfp459	zinc finger protein 459 [Source:MGI Symbol;Acc:MGI:3040701]	1.38474	1.82498	20.6496	5.51498e-06	4.58212e-05
ENSMUSG00000051351	22704	Zfp46	zinc finger protein 46 [Source:MGI Symbol;Acc:MGI:99192]	0.812823	5.11062	20.6481	5.51914e-06	4.58287e-05
ENSMUSG00000015501	15273	Hivep2	human immunodeficiency virus type I enhancer binding protein 2 [Source:MGI Symbol;Acc:MGI:1338076]	0.740508	7.43387	20.6468	5.52306e-06	4.58343e-05
ENSMUSG00000051527	57775	Usp29	ubiquitin specific peptidase 29 [Source:MGI Symbol;Acc:MGI:1888998]	-1.594	1.95226	20.6387	5.54622e-06	4.59993e-05
ENSMUSG00000045667	276829	Smtnl2	smoothelin-like 2 [Source:MGI Symbol;Acc:MGI:2442764]	2.59877	0.599242	20.6124	5.62294e-06	4.65815e-05
ENSMUSG00000030351	68498	Tspan11	tetraspanin 11 [Source:MGI Symbol;Acc:MGI:1915748]	1.46803	2.57204	20.6124	5.62305e-06	4.65815e-05
ENSMUSG00000019850	21929	Tnfaip3	tumor necrosis factor, alpha-induced protein 3 [Source:MGI Symbol;Acc:MGI:1196377]	1.23367	1.68765	20.6084	5.63497e-06	4.66528e-05
ENSMUSG00000031250	64103	Tnmd	tenomodulin [Source:MGI Symbol;Acc:MGI:1929885]	1.49664	1.34906	20.5893	5.69119e-06	4.70905e-05
ENSMUSG00000048834	211739	Vstm2a	V-set and transmembrane domain containing 2A [Source:MGI Symbol;Acc:MGI:2384826]	-1.14628	6.95343	20.5861	5.70084e-06	4.71279e-05
ENSMUSG00000004347	18575	Pde1c	phosphodiesterase 1C [Source:MGI Symbol;Acc:MGI:108413]	-1.41204	3.19742	20.5856	5.70242e-06	4.71279e-05
ENSMUSG00000079104	328099	Prps1l3	phosphoribosyl pyrophosphate synthetase 1-like 3 [Source:MGI Symbol;Acc:MGI:3779453]	-0.8488	2.73449	20.574	5.73693e-06	4.73853e-05
ENSMUSG00000025047	18572	Pdcd11	programmed cell death 11 [Source:MGI Symbol;Acc:MGI:1341788]	-0.831856	3.00841	20.5712	5.74552e-06	4.74283e-05
ENSMUSG00000028782	230775	Adgrb2	adhesion G protein-coupled receptor B2 [Source:MGI Symbol;Acc:MGI:2451244]	1.24228	4.28107	20.5694	5.75094e-06	4.74453e-05
ENSMUSG00000049038	74238	Mterf2	mitochondrial transcription termination factor 2 [Source:MGI Symbol;Acc:MGI:1921488]	-0.850977	3.95173	20.5679	5.75535e-06	4.74538e-05
ENSMUSG00000005087	12505	Cd44	CD44 antigen [Source:MGI Symbol;Acc:MGI:88338]	1.49776	3.33379	20.564	5.76698e-06	4.75218e-05
ENSMUSG00000074579	624866	Lekr1	leucine, glutamate and lysine rich 1 [Source:MGI Symbol;Acc:MGI:3645902]	-0.998083	2.41444	20.5508	5.8069e-06	4.78227e-05
ENSMUSG00000024955	26379	Esrra	estrogen related receptor, alpha [Source:MGI Symbol;Acc:MGI:1346831]	-1.11782	1.45468	20.5238	5.88936e-06	4.84735e-05
ENSMUSG00000044042	14260	Fmn1	formin 1 [Source:MGI Symbol;Acc:MGI:101815]	-1.12752	3.24747	20.5152	5.9159e-06	4.86634e-05
ENSMUSG00000049295	69890	Zfp219	zinc finger protein 219 [Source:MGI Symbol;Acc:MGI:1917140]	-1.50383	0.783766	20.5133	5.92198e-06	4.86849e-05
ENSMUSG00000066952	231646	Myo1h	myosin 1H [Source:MGI Symbol;Acc:MGI:1914674]	2.1308	-0.165283	20.5031	5.95362e-06	4.89164e-05
ENSMUSG00000020902	18208	Ntn1	netrin 1 [Source:MGI Symbol;Acc:MGI:105088]	-1.51473	1.62215	20.4904	5.99302e-06	4.92114e-05
ENSMUSG00000026589	89867	Sec16b	SEC16 homolog B (S. cerevisiae) [Source:MGI Symbol;Acc:MGI:2148802]	2.06487	0.416453	20.4742	6.04397e-06	4.96008e-05
ENSMUSG00000039782	231207	Cpeb2	cytoplasmic polyadenylation element binding protein 2 [Source:MGI Symbol;Acc:MGI:2442640]	0.993327	5.4543	20.4206	6.21559e-06	5.09795e-05
ENSMUSG00000042540	217698	Acot5	acyl-CoA thioesterase 5 [Source:MGI Symbol;Acc:MGI:2384969]	1.78264	0.251383	20.3845	6.33403e-06	5.19206e-05
ENSMUSG00000029470	18438	P2rx4	purinergic receptor P2X, ligand-gated ion channel 4 [Source:MGI Symbol;Acc:MGI:1338859]	1.09205	4.04592	20.3614	6.41106e-06	5.25214e-05
ENSMUSG00000037466	104732	4930427A07Rik	RIKEN cDNA 4930427A07 gene [Source:MGI Symbol;Acc:MGI:2144738]	2.06157	-0.0352675	20.3539	6.43629e-06	5.26973e-05
ENSMUSG00000053166	104010	Cdh22	cadherin 22 [Source:MGI Symbol;Acc:MGI:1341843]	1.03175	3.10588	20.3496	6.45082e-06	5.27438e-05
ENSMUSG00000032076	54725	Cadm1	cell adhesion molecule 1 [Source:MGI Symbol;Acc:MGI:1889272]	0.730351	8.65535	20.3484	6.45461e-06	5.27438e-05
ENSMUSG00000021262	14026	Evl	Ena-vasodilator stimulated phosphoprotein [Source:MGI Symbol;Acc:MGI:1194884]	-0.825728	4.1358	20.3481	6.45579e-06	5.27438e-05
ENSMUSG00000019899	16773	Lama2	laminin, alpha 2 [Source:MGI Symbol;Acc:MGI:99912]	1.55196	2.98557	20.3477	6.45697e-06	5.27438e-05
ENSMUSG00000016487	67533	Ppfibp1	PTPRF interacting protein, binding protein 1 (liprin beta 1) [Source:MGI Symbol;Acc:MGI:1914783]	1.09949	4.53532	20.3454	6.46497e-06	5.27784e-05
ENSMUSG00000087497	NA	2810001G20Rik	RIKEN cDNA 2810001G20 gene [Source:MGI Symbol;Acc:MGI:1913706]	-0.880729	3.20804	20.336	6.4968e-06	5.30075e-05
ENSMUSG00000024053	246707	Emilin2	elastin microfibril interfacer 2 [Source:MGI Symbol;Acc:MGI:2389136]	-1.72474	1.38271	20.3331	6.50649e-06	5.30558e-05
ENSMUSG00000045763	70350	Basp1	brain abundant, membrane attached signal protein 1 [Source:MGI Symbol;Acc:MGI:1917600]	1.1159	7.91332	20.3276	6.52513e-06	5.3177e-05
ENSMUSG00000020069	432467	Hnrnph3	heterogeneous nuclear ribonucleoprotein H3 [Source:MGI Symbol;Acc:MGI:1926462]	-0.822778	4.75086	20.3201	6.55079e-06	5.33552e-05
ENSMUSG00000028184	99633	Adgrl2	adhesion G protein-coupled receptor L2 [Source:MGI Symbol;Acc:MGI:2139714]	0.997091	6.47536	20.2959	6.63419e-06	5.40031e-05
ENSMUSG00000040490	70530	Lrfn2	leucine rich repeat and fibronectin type III domain containing 2 [Source:MGI Symbol;Acc:MGI:1917780]	1.05627	3.46622	20.2936	6.64236e-06	5.40384e-05
ENSMUSG00000020246	67933	Hcfc2	host cell factor C2 [Source:MGI Symbol;Acc:MGI:1915183]	0.724963	4.94261	20.275	6.70712e-06	5.45336e-05
ENSMUSG00000067629	240057	Syngap1	synaptic Ras GTPase activating protein 1 homolog (rat) [Source:MGI Symbol;Acc:MGI:3039785]	1.0245	2.58804	20.2726	6.71551e-06	5.45704e-05
ENSMUSG00000009356	76113	Lpo	lactoperoxidase [Source:MGI Symbol;Acc:MGI:1923363]	1.73728	0.137309	20.2596	6.76146e-06	5.4912e-05
ENSMUSG00000036362	74191	P2ry13	purinergic receptor P2Y, G-protein coupled 13 [Source:MGI Symbol;Acc:MGI:1921441]	-1.99655	3.58828	20.2559	6.77459e-06	5.49868e-05
ENSMUSG00000042444	235461	Fam63b	family with sequence similarity 63, member B [Source:MGI Symbol;Acc:MGI:2443086]	-1.2884	6.49777	20.2536	6.78251e-06	5.50193e-05
ENSMUSG00000097113	NA	Gm19705	predicted gene, 19705 [Source:MGI Symbol;Acc:MGI:5011890]	1.22136	1.19084	20.2469	6.80631e-06	5.51806e-05
ENSMUSG00000053226	23863	Dand5	DAN domain family member 5, BMP antagonist [Source:MGI Symbol;Acc:MGI:1344365]	-0.741494	3.43793	20.2357	6.84635e-06	5.54732e-05
ENSMUSG00000060212	270109	Pcnx2	pecanex homolog 2 [Source:MGI Symbol;Acc:MGI:2445010]	0.839273	5.51646	20.2105	6.93724e-06	5.61721e-05
ENSMUSG00000025572	217353	Tmc6	transmembrane channel-like gene family 6 [Source:MGI Symbol;Acc:MGI:1098686]	1.91887	0.833553	20.2095	6.9406e-06	5.61721e-05
ENSMUSG00000037579	16512	Kcnh3	potassium voltage-gated channel, subfamily H (eag-related), member 3 [Source:MGI Symbol;Acc:MGI:1341723]	0.928273	4.32166	20.1832	7.03684e-06	5.69182e-05
ENSMUSG00000051146	73047	Camk2n2	calcium/calmodulin-dependent protein kinase II inhibitor 2 [Source:MGI Symbol;Acc:MGI:1920297]	-1.1818	5.31267	20.1789	7.05284e-06	5.70148e-05
ENSMUSG00000026610	26381	Esrrg	estrogen-related receptor gamma [Source:MGI Symbol;Acc:MGI:1347056]	-1.09907	4.2204	20.1602	7.12181e-06	5.75394e-05
ENSMUSG00000034487	68304	Kdelc2	KDEL (Lys-Asp-Glu-Leu) containing 2 [Source:MGI Symbol;Acc:MGI:1923765]	1.14123	2.83946	20.1547	7.14246e-06	5.76537e-05
ENSMUSG00000048058	241576	Ldlrad3	low density lipoprotein receptor class A domain containing 3 [Source:MGI Symbol;Acc:MGI:2138856]	1.36661	3.56135	20.1542	7.14417e-06	5.76537e-05
ENSMUSG00000028223	67460	Decr1	2,4-dienoyl CoA reductase 1, mitochondrial [Source:MGI Symbol;Acc:MGI:1914710]	-1.53852	4.47718	20.1488	7.16458e-06	5.7776e-05
ENSMUSG00000036913	330863	Trim67	tripartite motif-containing 67 [Source:MGI Symbol;Acc:MGI:3045323]	-1.34499	1.99717	20.148	7.16755e-06	5.7776e-05
ENSMUSG00000000247	16870	Lhx2	LIM homeobox protein 2 [Source:MGI Symbol;Acc:MGI:96785]	1.83314	4.8212	20.1311	7.23094e-06	5.82536e-05
ENSMUSG00000036678	223921	Aaas	achalasia, adrenocortical insufficiency, alacrimia [Source:MGI Symbol;Acc:MGI:2443767]	0.952503	4.12651	20.1008	7.34646e-06	5.91504e-05
ENSMUSG00000048163	20345	Selplg	selectin, platelet (p-selectin) ligand [Source:MGI Symbol;Acc:MGI:106689]	-1.88698	2.92822	20.0978	7.35813e-06	5.92104e-05
ENSMUSG00000029804	73998	Herc3	hect domain and RLD 3 [Source:MGI Symbol;Acc:MGI:1921248]	1.01887	7.09842	20.0882	7.39502e-06	5.94733e-05
ENSMUSG00000024566	50771	Atp9b	ATPase, class II, type 9B [Source:MGI Symbol;Acc:MGI:1354757]	1.17903	5.01986	20.0733	7.45293e-06	5.99047e-05
ENSMUSG00000031853	234878	Map3k21	mitogen-activated protein kinase kinase kinase 21 [Source:MGI Symbol;Acc:MGI:2385307]	1.71234	1.59634	20.0636	7.49092e-06	6.01456e-05
ENSMUSG00000051920	239405	Rspo2	R-spondin 2 [Source:MGI Symbol;Acc:MGI:1922667]	1.36905	4.59849	20.0635	7.49146e-06	6.01456e-05
ENSMUSG00000027895	99738	Kcnc4	potassium voltage gated channel, Shaw-related subfamily, member 4 [Source:MGI Symbol;Acc:MGI:96670]	0.971189	5.68029	20.0293	7.62628e-06	6.1193e-05
ENSMUSG00000031518	69281	Spata4	spermatogenesis associated 4 [Source:MGI Symbol;Acc:MGI:1916531]	1.61822	-0.32709	20.0261	7.63925e-06	6.12622e-05
ENSMUSG00000087484	NA	2900089D17Rik	RIKEN cDNA 2900089D17 gene [Source:MGI Symbol;Acc:MGI:1914527]	1.35614	0.113579	20.0126	7.69338e-06	6.1661e-05
ENSMUSG00000041679	234684	Lrrc29	leucine rich repeat containing 29 [Source:MGI Symbol;Acc:MGI:2443262]	2.22181	1.38806	19.9996	7.74589e-06	6.20465e-05
ENSMUSG00000021411	66895	Pxdc1	PX domain containing 1 [Source:MGI Symbol;Acc:MGI:1914145]	-1.1673	2.50792	19.9862	7.80045e-06	6.24275e-05
ENSMUSG00000032530	69032	Lyzl4	lysozyme-like 4 [Source:MGI Symbol;Acc:MGI:1916282]	1.32692	0.58898	19.9857	7.80233e-06	6.24275e-05
ENSMUSG00000049536	237052	Tceal1	transcription elongation factor A (SII)-like 1 [Source:MGI Symbol;Acc:MGI:2385317]	-0.951245	5.43137	19.9843	7.80788e-06	6.24364e-05
ENSMUSG00000055371	56324	Stam2	signal transducing adaptor molecule (SH3 domain and ITAM motif) 2 [Source:MGI Symbol;Acc:MGI:1929100]	0.687179	4.54095	19.9697	7.86792e-06	6.28721e-05
ENSMUSG00000027500	20257	Stmn2	stathmin-like 2 [Source:MGI Symbol;Acc:MGI:98241]	0.865795	10.0088	19.9689	7.87131e-06	6.28721e-05
ENSMUSG00000052395	328370	Rft1	RFT1 homolog [Source:MGI Symbol;Acc:MGI:3607791]	0.932454	3.88377	19.9426	7.98029e-06	6.37064e-05
ENSMUSG00000029998	66881	Pcyox1	prenylcysteine oxidase 1 [Source:MGI Symbol;Acc:MGI:1914131]	0.793354	6.8416	19.9394	7.99373e-06	6.37775e-05
ENSMUSG00000020841	12874	Cpd	carboxypeptidase D [Source:MGI Symbol;Acc:MGI:107265]	0.977178	6.51725	19.9333	8.019e-06	6.39427e-05
ENSMUSG00000027797	13175	Dclk1	doublecortin-like kinase 1 [Source:MGI Symbol;Acc:MGI:1330861]	0.640694	9.84506	19.9234	8.06084e-06	6.424e-05
ENSMUSG00000024907	14419	Gal	galanin [Source:MGI Symbol;Acc:MGI:95637]	-2.35358	1.55349	19.9061	8.13391e-06	6.47856e-05
ENSMUSG00000001729	11651	Akt1	thymoma viral proto-oncogene 1 [Source:MGI Symbol;Acc:MGI:87986]	-0.766601	4.84881	19.888	8.21159e-06	6.53555e-05
ENSMUSG00000033208	20203	S100b	S100 protein, beta polypeptide, neural [Source:MGI Symbol;Acc:MGI:98217]	1.80071	8.28628	19.8872	8.21476e-06	6.53555e-05
ENSMUSG00000041658	245670	Rragb	Ras-related GTP binding B [Source:MGI Symbol;Acc:MGI:3038613]	-1.10481	2.27697	19.886	8.21988e-06	6.53592e-05
ENSMUSG00000037463	233040	Fbxo27	F-box protein 27 [Source:MGI Symbol;Acc:MGI:2685007]	0.916587	3.13033	19.8843	8.2274e-06	6.5382e-05
ENSMUSG00000047719	71707	Ubiad1	UbiA prenyltransferase domain containing 1 [Source:MGI Symbol;Acc:MGI:1918957]	-0.823953	3.32684	19.8778	8.25545e-06	6.55678e-05
ENSMUSG00000050711	20254	Scg2	secretogranin II [Source:MGI Symbol;Acc:MGI:103033]	-0.983848	9.24143	19.8736	8.27336e-06	6.5673e-05
ENSMUSG00000055799	21415	Tcf7l1	transcription factor 7 like 1 (T cell specific, HMG box) [Source:MGI Symbol;Acc:MGI:1202876]	-1.86956	1.69784	19.8601	8.33208e-06	6.61018e-05
ENSMUSG00000030657	233781	Xylt1	xylosyltransferase 1 [Source:MGI Symbol;Acc:MGI:2451073]	1.81606	2.47907	19.8463	8.39229e-06	6.65419e-05
ENSMUSG00000005054	13014	Cstb	cystatin B [Source:MGI Symbol;Acc:MGI:109514]	-0.804238	5.96252	19.8076	8.56401e-06	6.78652e-05
ENSMUSG00000091864	NA	Gm17102	predicted gene 17102 [Source:MGI Symbol;Acc:MGI:4937929]	-1.26184	2.15288	19.7946	8.62264e-06	6.82913e-05
ENSMUSG00000055850	66510	Rnf181	ring finger protein 181 [Source:MGI Symbol;Acc:MGI:1913760]	0.629598	6.37625	19.7899	8.64395e-06	6.84215e-05
ENSMUSG00000021994	22418	Wnt5a	wingless-type MMTV integration site family, member 5A [Source:MGI Symbol;Acc:MGI:98958]	-0.961967	3.9248	19.7703	8.73309e-06	6.90834e-05
ENSMUSG00000035580	211468	Kcnh8	potassium voltage-gated channel, subfamily H (eag-related), member 8 [Source:MGI Symbol;Acc:MGI:2445160]	-2.53825	-0.0775787	19.7693	8.73739e-06	6.90834e-05
ENSMUSG00000032348	14860	Gsta4	glutathione S-transferase, alpha 4 [Source:MGI Symbol;Acc:MGI:1309515]	0.992349	5.39379	19.7532	8.81155e-06	6.95961e-05
ENSMUSG00000060791	63986	Gmfg	glia maturation factor, gamma [Source:MGI Symbol;Acc:MGI:1927135]	-2.17738	1.04927	19.753	8.81214e-06	6.95961e-05
ENSMUSG00000028631	60613	Kcnq4	potassium voltage-gated channel, subfamily Q, member 4 [Source:MGI Symbol;Acc:MGI:1926803]	-1.1163	2.40931	19.7455	8.8471e-06	6.9833e-05
ENSMUSG00000030374	97387	Strn4	striatin, calmodulin binding protein 4 [Source:MGI Symbol;Acc:MGI:2142346]	0.781297	7.03363	19.7316	8.91167e-06	7.03031e-05
ENSMUSG00000028164	110173	Manba	mannosidase, beta A, lysosomal [Source:MGI Symbol;Acc:MGI:88175]	-1.03256	3.53994	19.6805	9.15319e-06	7.2168e-05
ENSMUSG00000031575	23808	Ash2l	ash2 (absent, small, or homeotic)-like (Drosophila) [Source:MGI Symbol;Acc:MGI:1344416]	-0.663947	4.60115	19.6648	9.22861e-06	7.27218e-05
ENSMUSG00000026571	74106	Dcaf6	DDB1 and CUL4 associated factor 6 [Source:MGI Symbol;Acc:MGI:1921356]	1.09392	5.80535	19.6626	9.23933e-06	7.27656e-05
ENSMUSG00000018654	22778	Ikzf1	IKAROS family zinc finger 1 [Source:MGI Symbol;Acc:MGI:1342540]	-1.98682	2.04325	19.6505	9.29769e-06	7.31842e-05
ENSMUSG00000023919	83815	Cenpq	centromere protein Q [Source:MGI Symbol;Acc:MGI:1933744]	-0.914039	3.10544	19.641	9.34434e-06	7.35102e-05
ENSMUSG00000041836	19267	Ptpre	protein tyrosine phosphatase, receptor type, E [Source:MGI Symbol;Acc:MGI:97813]	-0.587378	5.90617	19.6176	9.45952e-06	7.43747e-05
ENSMUSG00000033033	72691	Calhm2	calcium homeostasis modulator 2 [Source:MGI Symbol;Acc:MGI:1919941]	1.24219	2.72167	19.5905	9.59436e-06	7.53927e-05
ENSMUSG00000035239	50877	Neu3	neuraminidase 3 [Source:MGI Symbol;Acc:MGI:1355305]	-1.05391	0.700687	19.5602	9.74803e-06	7.65574e-05
ENSMUSG00000037747	70911	Phyhipl	phytanoyl-CoA hydroxylase interacting protein-like [Source:MGI Symbol;Acc:MGI:1918161]	-0.875727	8.15985	19.553	9.78482e-06	7.67501e-05
ENSMUSG00000031781	109006	Ciapin1	cytokine induced apoptosis inhibitor 1 [Source:MGI Symbol;Acc:MGI:1922083]	-0.498618	5.93143	19.5523	9.78846e-06	7.67501e-05
ENSMUSG00000093677	NA	Gm20712	predicted gene 20712 [Source:MGI Symbol;Acc:MGI:5313159]	-0.892271	2.89744	19.5522	9.78894e-06	7.67501e-05
ENSMUSG00000050926	245403	Dcaf12l2	DDB1 and CUL4 associated factor 12-like 2 [Source:MGI Symbol;Acc:MGI:2445178]	1.11297	1.91126	19.5426	9.83821e-06	7.70934e-05
ENSMUSG00000021273	14137	Fdft1	farnesyl diphosphate farnesyl transferase 1 [Source:MGI Symbol;Acc:MGI:102706]	0.918625	6.33118	19.5405	9.84911e-06	7.71358e-05
ENSMUSG00000040929	19726	Rfx3	regulatory factor X, 3 (influences HLA class II expression) [Source:MGI Symbol;Acc:MGI:106582]	0.958883	5.28128	19.489	1.01181e-05	7.91986e-05
ENSMUSG00000078864	626802	Gm14322	predicted gene 14322 [Source:MGI Symbol;Acc:MGI:3652185]	-1.51873	0.919415	19.4831	1.01491e-05	7.9397e-05
ENSMUSG00000025932	14048	Eya1	EYA transcriptional coactivator and phosphatase 1 [Source:MGI Symbol;Acc:MGI:109344]	-1.39035	3.19634	19.4793	1.01694e-05	7.95086e-05
ENSMUSG00000030346	19362	Rad51ap1	RAD51 associated protein 1 [Source:MGI Symbol;Acc:MGI:1098224]	1.26488	1.44727	19.4783	1.01747e-05	7.95086e-05
ENSMUSG00000038860	99326	Garnl3	GTPase activating RANGAP domain-like 3 [Source:MGI Symbol;Acc:MGI:2139309]	0.939315	6.17104	19.4764	1.01849e-05	7.95444e-05
ENSMUSG00000036896	12262	C1qc	complement component 1, q subcomponent, C chain [Source:MGI Symbol;Acc:MGI:88225]	-1.8021	4.327	19.4692	1.02233e-05	7.97993e-05
ENSMUSG00000042032	108645	Mat2b	methionine adenosyltransferase II, beta [Source:MGI Symbol;Acc:MGI:1913667]	0.819461	7.89951	19.4554	1.02976e-05	8.03346e-05
ENSMUSG00000037035	16324	Inhbb	inhibin beta-B [Source:MGI Symbol;Acc:MGI:96571]	1.34607	1.95881	19.4538	1.03061e-05	8.03568e-05
ENSMUSG00000044320	73598	1700001O22Rik	RIKEN cDNA 1700001O22 gene [Source:MGI Symbol;Acc:MGI:1923631]	-1.29356	0.951123	19.416	1.05123e-05	8.19187e-05
ENSMUSG00000020546	20913	Stxbp4	syntaxin binding protein 4 [Source:MGI Symbol;Acc:MGI:1342296]	0.711755	4.93644	19.4137	1.05251e-05	8.19359e-05
ENSMUSG00000063297	233271	Luzp2	leucine zipper protein 2 [Source:MGI Symbol;Acc:MGI:1889615]	-1.14438	4.67297	19.4135	1.05261e-05	8.19359e-05
ENSMUSG00000087184	NA	Gm11650	predicted gene 11650 [Source:MGI Symbol;Acc:MGI:3650132]	-2.4227	-0.196117	19.4034	1.05816e-05	8.23222e-05
ENSMUSG00000093565	NA	Rab26os	RAB26, member RAS oncogene family, opposite strand [Source:MGI Symbol;Acc:MGI:1922864]	-1.17656	2.27982	19.3881	1.06672e-05	8.29422e-05
ENSMUSG00000055184	108900	Fam72a	family with sequence similarity 72, member A [Source:MGI Symbol;Acc:MGI:1919669]	-1.21109	0.435318	19.3541	1.08587e-05	8.43849e-05
ENSMUSG00000062410	15494	Hsd3b3	hydroxy-delta-5-steroid dehydrogenase, 3 beta- and steroid delta-isomerase 3 [Source:MGI Symbol;Acc:MGI:96235]	1.29138	1.33179	19.3464	1.09025e-05	8.46777e-05
ENSMUSG00000026737	18718	Pip4k2a	phosphatidylinositol-5-phosphate 4-kinase, type II, alpha [Source:MGI Symbol;Acc:MGI:1298206]	0.885807	5.77864	19.3365	1.09593e-05	8.50719e-05
ENSMUSG00000018417	17912	Myo1b	myosin IB [Source:MGI Symbol;Acc:MGI:107752]	-0.907161	4.80881	19.3043	1.11457e-05	8.64401e-05
ENSMUSG00000003476	12922	Crhr2	corticotropin releasing hormone receptor 2 [Source:MGI Symbol;Acc:MGI:894312]	-1.42998	0.0991395	19.3039	1.11478e-05	8.64401e-05
ENSMUSG00000056211	226412	R3hdm1	R3H domain containing 1 [Source:MGI Symbol;Acc:MGI:2448514]	1.08037	8.09378	19.271	1.13416e-05	8.78943e-05
ENSMUSG00000027889	109674	Ampd2	adenosine monophosphate deaminase 2 [Source:MGI Symbol;Acc:MGI:88016]	-0.869815	4.27347	19.2693	1.13519e-05	8.79256e-05
ENSMUSG00000029073	79554	Cptp	ceramide-1-phosphate transfer protein [Source:MGI Symbol;Acc:MGI:1933107]	-0.703529	5.45096	19.266	1.13712e-05	8.80267e-05
ENSMUSG00000024594	73137	Prrc1	proline-rich coiled-coil 1 [Source:MGI Symbol;Acc:MGI:1916106]	0.732212	3.64131	19.2606	1.14033e-05	8.82267e-05
ENSMUSG00000075467	52838	Dnlz	DNL-type zinc finger [Source:MGI Symbol;Acc:MGI:106559]	-0.774534	4.36947	19.2567	1.1427e-05	8.83609e-05
ENSMUSG00000063142	16531	Kcnma1	potassium large conductance calcium-activated channel, subfamily M, alpha member 1 [Source:MGI Symbol;Acc:MGI:99923]	0.78815	8.1833	19.2481	1.14786e-05	8.87111e-05
ENSMUSG00000002329	67881	Mdp1	magnesium-dependent phosphatase 1 [Source:MGI Symbol;Acc:MGI:1915131]	0.601121	5.39044	19.2462	1.14897e-05	8.87485e-05
ENSMUSG00000043670	208666	Diras1	DIRAS family, GTP-binding RAS-like 1 [Source:MGI Symbol;Acc:MGI:2183442]	-1.03971	3.36324	19.2399	1.15276e-05	8.89922e-05
ENSMUSG00000028173	68151	Wls	wntless homolog (Drosophila) [Source:MGI Symbol;Acc:MGI:1915401]	1.18996	6.23679	19.2174	1.16647e-05	9.0001e-05
ENSMUSG00000036815	269109	Dpp10	dipeptidylpeptidase 10 [Source:MGI Symbol;Acc:MGI:2442409]	0.993731	7.63937	19.211	1.17036e-05	9.02516e-05
ENSMUSG00000043289	75033	Mei4	meiotic double-stranded break formation protein 4 [Source:MGI Symbol;Acc:MGI:1922283]	-1.82279	0.466365	19.1684	1.19681e-05	9.22407e-05
ENSMUSG00000000743	234852	Chmp1a	charged multivesicular body protein 1A [Source:MGI Symbol;Acc:MGI:1920159]	0.523173	6.02019	19.1639	1.1996e-05	9.24055e-05
ENSMUSG00000029817	101214	Tra2a	transformer 2 alpha homolog (Drosophila) [Source:MGI Symbol;Acc:MGI:1933972]	-0.870906	4.37624	19.1625	1.20052e-05	9.24253e-05
ENSMUSG00000033707	223665	Lrrc24	leucine rich repeat containing 24 [Source:MGI Symbol;Acc:MGI:3605040]	-1.11492	2.43779	19.154	1.20585e-05	9.27851e-05
ENSMUSG00000057329	12043	Bcl2	B cell leukemia/lymphoma 2 [Source:MGI Symbol;Acc:MGI:88138]	-0.81308	4.32853	19.1515	1.20744e-05	9.28564e-05
ENSMUSG00000026778	18761	Prkcq	protein kinase C, theta [Source:MGI Symbol;Acc:MGI:97601]	-1.60953	4.45047	19.1409	1.21415e-05	9.33217e-05
ENSMUSG00000060798	380614	Intu	inturned planar cell polarity protein [Source:MGI Symbol;Acc:MGI:2443752]	0.964979	2.32935	19.1338	1.21869e-05	9.36194e-05
ENSMUSG00000071637	12609	Cebpd	CCAAT/enhancer binding protein (C/EBP), delta [Source:MGI Symbol;Acc:MGI:103573]	1.48081	-0.0282786	19.1245	1.22461e-05	9.39594e-05
ENSMUSG00000086350	NA	B230369F24Rik	RIKEN cDNA B230369F24 gene [Source:MGI Symbol;Acc:MGI:2443392]	-0.926018	2.00741	19.1243	1.22477e-05	9.39594e-05
ENSMUSG00000008575	18028	Nfib	nuclear factor I/B [Source:MGI Symbol;Acc:MGI:103188]	0.803004	7.37264	19.1237	1.22512e-05	9.39594e-05
ENSMUSG00000072980	70645	Oip5	Opa interacting protein 5 [Source:MGI Symbol;Acc:MGI:1917895]	1.94769	0.405792	19.1021	1.23911e-05	9.49805e-05
ENSMUSG00000052105	68617	Mtcl1	microtubule crosslinking factor 1 [Source:MGI Symbol;Acc:MGI:1915867]	-0.714638	4.60858	19.0936	1.24459e-05	9.53487e-05
ENSMUSG00000032366	22003	Tpm1	tropomyosin 1, alpha [Source:MGI Symbol;Acc:MGI:98809]	-0.583369	7.68438	19.0872	1.2488e-05	9.5619e-05
ENSMUSG00000085024	NA	C230035I16Rik	RIKEN cDNA C230035I16 gene [Source:MGI Symbol;Acc:MGI:2444850]	-1.81925	0.713855	19.0736	1.25771e-05	9.62357e-05
ENSMUSG00000029659	70717	Medag	mesenteric estrogen dependent adipogenesis [Source:MGI Symbol;Acc:MGI:1917967]	1.09389	2.88868	19.0728	1.25822e-05	9.62357e-05
ENSMUSG00000046341	NA	Gm11223	predicted gene 11223 [Source:MGI Symbol;Acc:MGI:3651631]	1.12121	1.4702	19.0678	1.26159e-05	9.64404e-05
ENSMUSG00000025077	55947	Dclre1a	DNA cross-link repair 1A [Source:MGI Symbol;Acc:MGI:1930042]	0.93768	2.45342	19.0554	1.26981e-05	9.70161e-05
ENSMUSG00000031099	93761	Smarca1	SWI/SNF related, matrix associated, actin dependent regulator of chromatin, subfamily a, member 1 [Source:MGI Symbol;Acc:MGI:1935127]	-0.576367	5.12724	19.0514	1.27244e-05	9.71647e-05
ENSMUSG00000062591	22153	Tubb4a	tubulin, beta 4A class IVA [Source:MGI Symbol;Acc:MGI:107848]	0.809304	10.3799	19.045	1.2767e-05	9.74367e-05
ENSMUSG00000030946	76429	Lhpp	phospholysine phosphohistidine inorganic pyrophosphate phosphatase [Source:MGI Symbol;Acc:MGI:1923679]	0.676162	4.88477	19.0415	1.27903e-05	9.75617e-05
ENSMUSG00000021550	70153	2210016F16Rik	RIKEN cDNA 2210016F16 gene [Source:MGI Symbol;Acc:MGI:1917403]	-1.07659	2.66235	19.0367	1.28226e-05	9.77548e-05
ENSMUSG00000042726	231712	Trafd1	TRAF type zinc finger domain containing 1 [Source:MGI Symbol;Acc:MGI:1923551]	0.835021	4.51302	19.0275	1.2885e-05	9.81773e-05
ENSMUSG00000037933	76895	Bicd2	bicaudal D homolog 2 (Drosophila) [Source:MGI Symbol;Acc:MGI:1924145]	-0.698025	4.74341	19.0196	1.29381e-05	9.85283e-05
ENSMUSG00000041801	27280	Phlda3	pleckstrin homology like domain, family A, member 3 [Source:MGI Symbol;Acc:MGI:1351485]	-0.836691	3.029	19.0158	1.2964e-05	9.86726e-05
ENSMUSG00000027397	20515	Slc20a1	solute carrier family 20, member 1 [Source:MGI Symbol;Acc:MGI:108392]	0.908159	7.29591	19.0139	1.29771e-05	9.87187e-05
ENSMUSG00000089857	382019	Zfp882	zinc finger protein 882 [Source:MGI Symbol;Acc:MGI:3642748]	-1.15339	1.71071	19.0007	1.30672e-05	9.93505e-05
ENSMUSG00000028382	230257	Ptbp3	polypyrimidine tract binding protein 3 [Source:MGI Symbol;Acc:MGI:1923334]	0.862967	4.12177	18.9737	1.32531e-05	0.000100709
ENSMUSG00000020284	67884	1810043G02Rik	RIKEN cDNA 1810043G02 gene [Source:MGI Symbol;Acc:MGI:1915134]	0.599755	4.09227	18.9515	1.34087e-05	0.000101837
ENSMUSG00000025040	72018	Fundc1	FUN14 domain containing 1 [Source:MGI Symbol;Acc:MGI:1919268]	-0.851644	5.73915	18.9491	1.34251e-05	0.000101906
ENSMUSG00000019892	74978	Lrriq1	leucine-rich repeats and IQ motif containing 1 [Source:MGI Symbol;Acc:MGI:1922228]	1.61728	1.03273	18.9448	1.34557e-05	0.000102084
ENSMUSG00000048216	64450	Gpr85	G protein-coupled receptor 85 [Source:MGI Symbol;Acc:MGI:1927851]	0.905636	6.63275	18.93	1.35604e-05	0.000102822
ENSMUSG00000040006	215751	Ginm1	glycoprotein integral membrane 1 [Source:MGI Symbol;Acc:MGI:2384905]	0.914221	4.2787	18.9226	1.36132e-05	0.000103167
ENSMUSG00000028078	70762	Dclk2	doublecortin-like kinase 2 [Source:MGI Symbol;Acc:MGI:1918012]	-0.940472	4.87346	18.9131	1.36809e-05	0.000103624
ENSMUSG00000054619	70152	Mettl7a1	methyltransferase like 7A1 [Source:MGI Symbol;Acc:MGI:1916523]	0.843217	3.5103	18.9073	1.37225e-05	0.000103837
ENSMUSG00000028136	76742	Snx27	sorting nexin family member 27 [Source:MGI Symbol;Acc:MGI:1923992]	-0.88118	6.98023	18.9071	1.37238e-05	0.000103837
ENSMUSG00000043964	269999	Orai3	ORAI calcium release-activated calcium modulator 3 [Source:MGI Symbol;Acc:MGI:3039586]	0.792274	4.26232	18.8906	1.38431e-05	0.000104683
ENSMUSG00000021255	26380	Esrrb	estrogen related receptor, beta [Source:MGI Symbol;Acc:MGI:1346832]	-1.11648	0.771618	18.8782	1.39335e-05	0.000105311
ENSMUSG00000087578	NA	Ccdc142os	coiled-coil domain containing 142, opposite strand [Source:MGI Symbol;Acc:MGI:3783052]	-1.5143	-0.0311885	18.8741	1.39635e-05	0.00010548
ENSMUSG00000040452	215654	Cdh12	cadherin 12 [Source:MGI Symbol;Acc:MGI:109503]	0.845808	5.7907	18.861	1.40601e-05	0.000106153
ENSMUSG00000038539	107503	Atf5	activating transcription factor 5 [Source:MGI Symbol;Acc:MGI:2141857]	-1.72441	2.75985	18.8597	1.40692e-05	0.000106165
ENSMUSG00000094626	94047	Cecr6	cat eye syndrome chromosome region, candidate 6 [Source:MGI Symbol;Acc:MGI:2136977]	1.0394	5.77878	18.8484	1.41533e-05	0.000106742
ENSMUSG00000027956	70652	Tmem144	transmembrane protein 144 [Source:MGI Symbol;Acc:MGI:1917902]	1.11807	3.0962	18.8372	1.4236e-05	0.000107308
ENSMUSG00000027355	67356	Tmco5	transmembrane and coiled-coil domains 5 [Source:MGI Symbol;Acc:MGI:1914606]	1.7543	1.35778	18.8315	1.42792e-05	0.000107576
ENSMUSG00000098132	78748	Rassf10	Ras association (RalGDS/AF-6) domain family (N-terminal) member 10 [Source:MGI Symbol;Acc:MGI:1925998]	-2.1619	1.26546	18.8235	1.43393e-05	0.000107971
ENSMUSG00000062906	170787	Hdac10	histone deacetylase 10 [Source:MGI Symbol;Acc:MGI:2158340]	1.31427	3.25645	18.8212	1.43561e-05	0.00010804
ENSMUSG00000038369	56406	Ncoa6	nuclear receptor coactivator 6 [Source:MGI Symbol;Acc:MGI:1929915]	0.606325	5.588	18.8131	1.44176e-05	0.000108415
ENSMUSG00000041058	107568	Wwp1	WW domain containing E3 ubiquitin protein ligase 1 [Source:MGI Symbol;Acc:MGI:1861728]	-0.831214	5.00361	18.8126	1.44214e-05	0.000108415
ENSMUSG00000029778	11517	Adcyap1r1	adenylate cyclase activating polypeptide 1 receptor 1 [Source:MGI Symbol;Acc:MGI:108449]	-0.78697	7.21695	18.81	1.44412e-05	0.000108505
ENSMUSG00000031568	192174	Rwdd4a	RWD domain containing 4A [Source:MGI Symbol;Acc:MGI:2681000]	-0.703314	4.56327	18.7839	1.46398e-05	0.000109939
ENSMUSG00000042015	218460	Wdr41	WD repeat domain 41 [Source:MGI Symbol;Acc:MGI:2445123]	-0.707047	4.2827	18.781	1.4662e-05	0.000110047
ENSMUSG00000095105	171211	Edaradd	EDAR (ectodysplasin-A receptor)-associated death domain [Source:MGI Symbol;Acc:MGI:1931001]	-2.12871	-0.198672	18.7668	1.47718e-05	0.000110812
ENSMUSG00000001419	17261	Mef2d	myocyte enhancer factor 2D [Source:MGI Symbol;Acc:MGI:99533]	0.664382	6.44411	18.7578	1.48416e-05	0.000111276
ENSMUSG00000019558	102857	Slc6a8	solute carrier family 6 (neurotransmitter transporter, creatine), member 8 [Source:MGI Symbol;Acc:MGI:2147834]	-0.598522	6.46742	18.7565	1.48516e-05	0.000111292
ENSMUSG00000038619	56205	Ensa	endosulfine alpha [Source:MGI Symbol;Acc:MGI:1891189]	0.657128	8.72833	18.751	1.48948e-05	0.000111557
ENSMUSG00000026616	12902	Cr2	complement receptor 2 [Source:MGI Symbol;Acc:MGI:88489]	-2.61114	-0.652829	18.7254	1.50956e-05	0.000112903
ENSMUSG00000039372	381270	2018-03-04	membrane-associated ring finger (C3HC4) 4 [Source:MGI Symbol;Acc:MGI:2683550]	-0.870596	3.54376	18.7247	1.51012e-05	0.000112903
ENSMUSG00000039953	65945	Clstn1	calsyntenin 1 [Source:MGI Symbol;Acc:MGI:1929895]	0.960587	9.59276	18.7247	1.51016e-05	0.000112903
ENSMUSG00000071711	246221	Mpst	mercaptopyruvate sulfurtransferase [Source:MGI Symbol;Acc:MGI:2179733]	-1.36304	1.31925	18.724	1.51067e-05	0.000112903
ENSMUSG00000029161	68567	Cgref1	cell growth regulator with EF hand domain 1 [Source:MGI Symbol;Acc:MGI:1915817]	-0.888376	4.74756	18.7229	1.51157e-05	0.00011291
ENSMUSG00000028780	20348	Sema3c	sema domain, immunoglobulin domain (Ig), short basic domain, secreted, (semaphorin) 3C [Source:MGI Symbol;Acc:MGI:107557]	-1.1694	4.86851	18.7152	1.51764e-05	0.000113303
ENSMUSG00000028546	15572	Elavl4	ELAV (embryonic lethal, abnormal vision, Drosophila)-like 4 (Hu antigen D) [Source:MGI Symbol;Acc:MGI:107427]	0.838252	7.305	18.6904	1.53754e-05	0.000114728
ENSMUSG00000023918	78249	Adgrf4	adhesion G protein-coupled receptor F4 [Source:MGI Symbol;Acc:MGI:1925499]	1.9466	0.879254	18.6883	1.53928e-05	0.000114797
ENSMUSG00000050730	71544	Arhgap42	Rho GTPase activating protein 42 [Source:MGI Symbol;Acc:MGI:1918794]	0.944664	3.12996	18.6793	1.54655e-05	0.000115277
ENSMUSG00000049422	103172	Chchd10	coiled-coil-helix-coiled-coil-helix domain containing 10 [Source:MGI Symbol;Acc:MGI:2143558]	-1.19323	6.37739	18.6757	1.54942e-05	0.000115431
ENSMUSG00000097006	NA	9530082P21Rik	RIKEN cDNA 9530082P21 gene [Source:MGI Symbol;Acc:MGI:3603340]	-0.701912	7.37901	18.671	1.55323e-05	0.000115653
ENSMUSG00000031075	101772	Ano1	anoctamin 1, calcium activated chloride channel [Source:MGI Symbol;Acc:MGI:2142149]	-3.42676	-0.00213109	18.6507	1.56989e-05	0.000116831
ENSMUSG00000027848	99543	Olfml3	olfactomedin-like 3 [Source:MGI Symbol;Acc:MGI:1914877]	-1.93971	4.60422	18.6347	1.5831e-05	0.000117753
ENSMUSG00000025905	18387	Oprk1	opioid receptor, kappa 1 [Source:MGI Symbol;Acc:MGI:97439]	-1.30792	3.70381	18.6144	1.60005e-05	0.000118951
ENSMUSG00000039747	269717	Orai2	ORAI calcium release-activated calcium modulator 2 [Source:MGI Symbol;Acc:MGI:2443195]	0.655983	5.77963	18.6092	1.60447e-05	0.000119216
ENSMUSG00000064722	NA	Gm25857	predicted gene, 25857 [Source:MGI Symbol;Acc:MGI:5455634]	1.43227	-0.222158	18.5792	1.62989e-05	0.00012104
ENSMUSG00000004885	12904	Crabp2	cellular retinoic acid binding protein II [Source:MGI Symbol;Acc:MGI:88491]	-1.5234	1.24652	18.5705	1.63738e-05	0.000121529
ENSMUSG00000032368	22771	Zic1	zinc finger protein of the cerebellum 1 [Source:MGI Symbol;Acc:MGI:106683]	-2.3397	2.92984	18.5695	1.63819e-05	0.000121529
ENSMUSG00000035355	380728	Kcnh4	potassium voltage-gated channel, subfamily H (eag-related), member 4 [Source:MGI Symbol;Acc:MGI:2156184]	-1.18087	2.56756	18.5661	1.64117e-05	0.000121685
ENSMUSG00000026014	77300	Raph1	Ras association (RalGDS/AF-6) and pleckstrin homology domains 1 [Source:MGI Symbol;Acc:MGI:1924550]	0.714764	5.88778	18.5507	1.65444e-05	0.000122592
ENSMUSG00000053930	380702	Shisa6	shisa family member 6 [Source:MGI Symbol;Acc:MGI:2685725]	-0.881377	4.66032	18.5499	1.65514e-05	0.000122592
ENSMUSG00000024645	67105	Timm21	tranlocase of inner mitochondrial membrane 21 [Source:MGI Symbol;Acc:MGI:1920595]	-0.761035	3.52576	18.5284	1.67394e-05	0.000123919
ENSMUSG00000028864	15234	Hgf	hepatocyte growth factor [Source:MGI Symbol;Acc:MGI:96079]	1.72418	1.08	18.5207	1.6807e-05	0.000124354
ENSMUSG00000020840	104184	Blmh	bleomycin hydrolase [Source:MGI Symbol;Acc:MGI:1345186]	-0.512639	6.42973	18.5112	1.68908e-05	0.000124909
ENSMUSG00000043439	103551	Epop	elongin BC and polycomb repressive complex 2 associated protein [Source:MGI Symbol;Acc:MGI:2143991]	0.945081	4.27865	18.4973	1.70144e-05	0.000125756
ENSMUSG00000068117	74369	Mei1	meiotic double-stranded break formation protein 1 [Source:MGI Symbol;Acc:MGI:3028590]	1.14204	1.81118	18.4731	1.72318e-05	0.000127245
ENSMUSG00000044164	328234	Rnf182	ring finger protein 182 [Source:MGI Symbol;Acc:MGI:3045355]	0.876579	4.5687	18.4729	1.72339e-05	0.000127245
ENSMUSG00000025240	83493	Sacm1l	SAC1 suppressor of actin mutations 1-like (yeast) [Source:MGI Symbol;Acc:MGI:1933169]	-0.779796	6.26288	18.4716	1.72454e-05	0.000127263
ENSMUSG00000026608	226823	Kctd3	potassium channel tetramerisation domain containing 3 [Source:MGI Symbol;Acc:MGI:2444629]	0.630878	5.79212	18.4682	1.72765e-05	0.000127425
ENSMUSG00000050141	277773	Fam205c	family with sequence similarity 205, member C [Source:MGI Symbol;Acc:MGI:2679716]	1.77264	1.16049	18.4611	1.73404e-05	0.00012783
ENSMUSG00000086316	NA	2210013O21Rik	RIKEN cDNA 2210013O21 gene [Source:MGI Symbol;Acc:MGI:1917373]	-0.960032	6.13669	18.4426	1.75098e-05	0.000128986
ENSMUSG00000021978	54616	Extl3	exostoses (multiple)-like 3 [Source:MGI Symbol;Acc:MGI:1860765]	0.833692	6.25663	18.442	1.75156e-05	0.000128986
ENSMUSG00000026270	23830	Capn10	calpain 10 [Source:MGI Symbol;Acc:MGI:1344392]	-0.723931	4.17012	18.4389	1.75438e-05	0.000129126
ENSMUSG00000051185	67698	Fam174a	family with sequence similarity 174, member A [Source:MGI Symbol;Acc:MGI:1914948]	-1.06747	5.65596	18.4362	1.75691e-05	0.000129244
ENSMUSG00000045316	68636	Fahd1	fumarylacetoacetate hydrolase domain containing 1 [Source:MGI Symbol;Acc:MGI:1915886]	-0.649318	4.18807	18.4256	1.76666e-05	0.000129894
ENSMUSG00000079598	665180	Clec2l	C-type lectin domain family 2, member L [Source:MGI Symbol;Acc:MGI:2141402]	-0.670223	6.68192	18.4159	1.77572e-05	0.000130492
ENSMUSG00000086040	330319	Wipf3	WAS/WASL interacting protein family, member 3 [Source:MGI Symbol;Acc:MGI:3044681]	-0.736524	6.86529	18.4098	1.78136e-05	0.000130838
ENSMUSG00000025648	270198	Pfkfb4	6-phosphofructo-2-kinase/fructose-2,6-biphosphatase 4 [Source:MGI Symbol;Acc:MGI:2687284]	1.30146	2.44638	18.3744	1.81476e-05	0.000133222
ENSMUSG00000037736	77569	Limch1	LIM and calponin homology domains 1 [Source:MGI Symbol;Acc:MGI:1924819]	-2.22941	7.6933	18.3572	1.83129e-05	0.000134365
ENSMUSG00000002416	68198	Ndufb2	NADH dehydrogenase (ubiquinone) 1 beta subcomplex, 2 [Source:MGI Symbol;Acc:MGI:1915448]	-0.808867	5.81556	18.3529	1.83543e-05	0.000134598
ENSMUSG00000061244	105504	Exoc5	exocyst complex component 5 [Source:MGI Symbol;Acc:MGI:2145645]	0.7033	5.73046	18.3489	1.83921e-05	0.000134805
ENSMUSG00000028278	52187	Rragd	Ras-related GTP binding D [Source:MGI Symbol;Acc:MGI:1098604]	-0.685891	6.38059	18.3383	1.84955e-05	0.000135472
ENSMUSG00000028082	27059	Sh3d19	SH3 domain protein D19 [Source:MGI Symbol;Acc:MGI:1350923]	1.16471	3.35185	18.3376	1.85024e-05	0.000135472
ENSMUSG00000052040	50794	Klf13	Kruppel-like factor 13 [Source:MGI Symbol;Acc:MGI:1354948]	1.3531	9.73486	18.3177	1.86963e-05	0.000136821
ENSMUSG00000056602	320365	Fry	FRY microtubule binding protein [Source:MGI Symbol;Acc:MGI:2443895]	0.965404	7.64145	18.3166	1.87066e-05	0.000136825
ENSMUSG00000051111	75209	Sv2c	synaptic vesicle glycoprotein 2c [Source:MGI Symbol;Acc:MGI:1922459]	-1.40951	1.60673	18.3086	1.87857e-05	0.000137332
ENSMUSG00000027312	11990	Atrn	attractin [Source:MGI Symbol;Acc:MGI:1341628]	0.745635	7.264	18.3009	1.88617e-05	0.000137816
ENSMUSG00000026509	12334	Capn2	calpain 2 [Source:MGI Symbol;Acc:MGI:88264]	-0.917686	5.86329	18.2987	1.88836e-05	0.000137904
ENSMUSG00000058835	11308	Abi1	abl-interactor 1 [Source:MGI Symbol;Acc:MGI:104913]	0.549256	6.87442	18.2855	1.90151e-05	0.000138792
ENSMUSG00000032555	235559	Topbp1	topoisomerase (DNA) II binding protein 1 [Source:MGI Symbol;Acc:MGI:1920018]	0.673606	3.82837	18.2688	1.91825e-05	0.000139941
ENSMUSG00000032024	71566	Clmp	CXADR-like membrane protein [Source:MGI Symbol;Acc:MGI:1918816]	-0.958485	4.94589	18.265	1.92207e-05	0.000140148
ENSMUSG00000061535	109323	C1qtnf7	C1q and tumor necrosis factor related protein 7 [Source:MGI Symbol;Acc:MGI:1925911]	-1.89266	0.0872112	18.2533	1.93395e-05	0.000140941
ENSMUSG00000022770	13383	Dlg1	discs, large homolog 1 (Drosophila) [Source:MGI Symbol;Acc:MGI:107231]	0.85375	6.54778	18.2507	1.93655e-05	0.000141057
ENSMUSG00000048915	13640	Efna5	ephrin A5 [Source:MGI Symbol;Acc:MGI:107444]	1.43813	7.17565	18.2466	1.94073e-05	0.000141289
ENSMUSG00000029314	231510	Gpat3	glycerol-3-phosphate acyltransferase 3 [Source:MGI Symbol;Acc:MGI:3603816]	-1.50906	2.27229	18.2371	1.95039e-05	0.000141918
ENSMUSG00000020523	67726	Fam114a2	family with sequence similarity 114, member A2 [Source:MGI Symbol;Acc:MGI:1917629]	-0.664327	5.27581	18.2237	1.96417e-05	0.000142847
ENSMUSG00000028289	13841	Epha7	Eph receptor A7 [Source:MGI Symbol;Acc:MGI:95276]	1.14564	7.0112	18.2132	1.97506e-05	0.000143565
ENSMUSG00000002997	19088	Prkar2b	protein kinase, cAMP dependent regulatory, type II beta [Source:MGI Symbol;Acc:MGI:97760]	-0.946779	5.99846	18.2074	1.98107e-05	0.000143927
ENSMUSG00000007827	232339	Ankrd26	ankyrin repeat domain 26 [Source:MGI Symbol;Acc:MGI:1917887]	-0.669153	4.98307	18.1589	2.03222e-05	0.000147567
ENSMUSG00000055048	NA	Gm9962	predicted gene 9962 [Source:MGI Symbol;Acc:MGI:3642695]	-1.56128	1.01743	18.1565	2.03475e-05	0.000147674
ENSMUSG00000085227	NA	6330418K02Rik	RIKEN cDNA 6330418K02 gene [Source:MGI Symbol;Acc:MGI:3697416]	-1.26777	0.649332	18.1452	2.0468e-05	0.000148472
ENSMUSG00000038886	140481	Man2a2	mannosidase 2, alpha 2 [Source:MGI Symbol;Acc:MGI:2150656]	-0.718908	6.62564	18.1431	2.04906e-05	0.000148559
ENSMUSG00000054455	56491	Vapb	vesicle-associated membrane protein, associated protein B and C [Source:MGI Symbol;Acc:MGI:1928744]	-0.749271	5.86771	18.1408	2.05161e-05	0.000148668
ENSMUSG00000025466	69064	Fuom	fucose mutarotase [Source:MGI Symbol;Acc:MGI:1916314]	-0.703589	5.30389	18.1155	2.07906e-05	0.000150579
ENSMUSG00000072949	26897	Acot1	acyl-CoA thioesterase 1 [Source:MGI Symbol;Acc:MGI:1349396]	1.607	2.05306	18.108	2.08725e-05	0.000151095
ENSMUSG00000006289	66246	Osgep	O-sialoglycoprotein endopeptidase [Source:MGI Symbol;Acc:MGI:1913496]	-0.985593	3.90811	18.0998	2.09624e-05	0.000151667
ENSMUSG00000029055	269615	Plch2	phospholipase C, eta 2 [Source:MGI Symbol;Acc:MGI:2443078]	-0.944256	3.3294	18.0986	2.09756e-05	0.000151685
ENSMUSG00000003418	241230	St8sia6	ST8 alpha-N-acetyl-neuraminide alpha-2,8-sialyltransferase 6 [Source:MGI Symbol;Acc:MGI:2386797]	-1.68731	1.10237	18.0943	2.10233e-05	0.000151951
ENSMUSG00000015980	76612	Lrrc27	leucine rich repeat containing 27 [Source:MGI Symbol;Acc:MGI:1923862]	-0.759712	2.74183	18.0897	2.10738e-05	0.000152238
ENSMUSG00000030276	101100	Ttll3	tubulin tyrosine ligase-like family, member 3 [Source:MGI Symbol;Acc:MGI:2141418]	1.65902	1.45383	18.0736	2.1253e-05	0.000153425
ENSMUSG00000072487	268816	Mroh5	maestro heat-like repeat family member 5 [Source:MGI Symbol;Acc:MGI:2685474]	1.06942	0.928417	18.073	2.12599e-05	0.000153425
ENSMUSG00000060961	54403	Slc4a4	solute carrier family 4 (anion exchanger), member 4 [Source:MGI Symbol;Acc:MGI:1927555]	-1.32555	7.52462	18.0689	2.1305e-05	0.000153671
ENSMUSG00000015709	11864	Arnt2	aryl hydrocarbon receptor nuclear translocator 2 [Source:MGI Symbol;Acc:MGI:107188]	-0.619519	7.74037	18.0493	2.15253e-05	0.000155181
ENSMUSG00000025892	14802	Gria4	glutamate receptor, ionotropic, AMPA4 (alpha 4) [Source:MGI Symbol;Acc:MGI:95811]	-0.788428	5.99882	18.044	2.15854e-05	0.000155534
ENSMUSG00000035566	219228	Pcdh17	protocadherin 17 [Source:MGI Symbol;Acc:MGI:2684924]	-0.606633	7.18086	18.032	2.17221e-05	0.000156439
ENSMUSG00000037994	97086	Slc9b2	solute carrier family 9, subfamily B (NHA2, cation proton antiporter 2), member 2 [Source:MGI Symbol;Acc:MGI:2140077]	1.70603	1.47745	18.031	2.17333e-05	0.000156439
ENSMUSG00000017466	21858	Timp2	tissue inhibitor of metalloproteinase 2 [Source:MGI Symbol;Acc:MGI:98753]	0.746966	8.74787	18.0265	2.17853e-05	0.000156733
ENSMUSG00000020303	20856	Stc2	stanniocalcin 2 [Source:MGI Symbol;Acc:MGI:1316731]	-1.19781	1.00139	18.0235	2.18191e-05	0.000156897
ENSMUSG00000069920	97440	B3gnt9	UDP-GlcNAc:betaGal beta-1,3-N-acetylglucosaminyltransferase 9 [Source:MGI Symbol;Acc:MGI:2142841]	-1.41973	1.08711	18.0175	2.18887e-05	0.000157316
ENSMUSG00000049119	242297	Fam110b	family with sequence similarity 110, member B [Source:MGI Symbol;Acc:MGI:1916593]	-0.752464	5.25323	18.0076	2.20022e-05	0.000158052
ENSMUSG00000032503	74100	Arpp21	cyclic AMP-regulated phosphoprotein, 21 [Source:MGI Symbol;Acc:MGI:107562]	-0.716667	9.75501	17.9988	2.21049e-05	0.000158639
ENSMUSG00000046985	231225	Tapt1	transmembrane anterior posterior transformation 1 [Source:MGI Symbol;Acc:MGI:2683537]	0.648347	5.65694	17.9986	2.21065e-05	0.000158639
ENSMUSG00000063239	268934	Grm4	glutamate receptor, metabotropic 4 [Source:MGI Symbol;Acc:MGI:1351341]	-0.861097	4.70701	17.9718	2.24208e-05	0.000160811
ENSMUSG00000026650	104362	Meig1	meiosis expressed gene 1 [Source:MGI Symbol;Acc:MGI:1202878]	1.24066	1.14417	17.9708	2.24321e-05	0.000160811
ENSMUSG00000043257	230801	Pigv	phosphatidylinositol glycan anchor biosynthesis, class V [Source:MGI Symbol;Acc:MGI:2442480]	-0.983387	2.30104	17.9606	2.25525e-05	0.000161592
ENSMUSG00000033854	72258	Kcnk10	potassium channel, subfamily K, member 10 [Source:MGI Symbol;Acc:MGI:1919508]	1.11721	1.94497	17.9577	2.25867e-05	0.000161754
ENSMUSG00000021364	54326	Elovl2	elongation of very long chain fatty acids (FEN1/Elo2, SUR4/Elo3, yeast)-like 2 [Source:MGI Symbol;Acc:MGI:1858960]	1.3768	4.71933	17.9562	2.26046e-05	0.0001618
ENSMUSG00000097413	NA	A830052D11Rik	RIKEN cDNA A830052D11 gene [Source:MGI Symbol;Acc:MGI:3028074]	1.41554	0.208593	17.9515	2.26603e-05	0.000162116
ENSMUSG00000000296	21987	Tpd52l1	tumor protein D52-like 1 [Source:MGI Symbol;Acc:MGI:1298386]	0.794266	4.50773	17.9378	2.28245e-05	0.000163208
ENSMUSG00000053477	21413	Tcf4	transcription factor 4 [Source:MGI Symbol;Acc:MGI:98506]	-0.728131	9.08894	17.9117	2.31395e-05	0.000165376
ENSMUSG00000034282	14027	Evpl	envoplakin [Source:MGI Symbol;Acc:MGI:107507]	-1.78361	-0.000157761	17.9052	2.3219e-05	0.00016586
ENSMUSG00000026077	18143	Npas2	neuronal PAS domain protein 2 [Source:MGI Symbol;Acc:MGI:109232]	0.945159	4.16024	17.8934	2.33634e-05	0.000166807
ENSMUSG00000029507	56361	Pus1	pseudouridine synthase 1 [Source:MGI Symbol;Acc:MGI:1929237]	-0.685948	3.42709	17.8762	2.35755e-05	0.000168236
ENSMUSG00000042532	71146	Golga7b	golgi autoantigen, golgin subfamily a, 7B [Source:MGI Symbol;Acc:MGI:1918396]	1.14417	8.06926	17.873	2.36154e-05	0.000168435
ENSMUSG00000001741	16170	Il16	interleukin 16 [Source:MGI Symbol;Acc:MGI:1270855]	1.39257	2.54018	17.8691	2.3663e-05	0.000168689
ENSMUSG00000026584	240880	Scyl3	SCY1-like 3 (S. cerevisiae) [Source:MGI Symbol;Acc:MGI:1921385]	0.732227	3.73207	17.8591	2.37881e-05	0.000169495
ENSMUSG00000029344	22022	Tpst2	protein-tyrosine sulfotransferase 2 [Source:MGI Symbol;Acc:MGI:1309516]	0.749781	4.49611	17.853	2.3864e-05	0.000169949
ENSMUSG00000047161	71367	Chst9	carbohydrate (N-acetylgalactosamine 4-0) sulfotransferase 9 [Source:MGI Symbol;Acc:MGI:1918617]	2.90071	0.357982	17.8501	2.39009e-05	0.000170126
ENSMUSG00000025314	19271	Ptprj	protein tyrosine phosphatase, receptor type, J [Source:MGI Symbol;Acc:MGI:104574]	1.04285	3.91028	17.8446	2.39695e-05	0.000170528
ENSMUSG00000041653	116939	Pnpla3	patatin-like phospholipase domain containing 3 [Source:MGI Symbol;Acc:MGI:2151796]	1.21728	3.02625	17.809	2.44231e-05	0.000173667
ENSMUSG00000033910	60596	Gucy1a3	guanylate cyclase 1, soluble, alpha 3 [Source:MGI Symbol;Acc:MGI:1926562]	-0.730085	6.52607	17.7795	2.48038e-05	0.000176285
ENSMUSG00000026429	67196	Ube2t	ubiquitin-conjugating enzyme E2T [Source:MGI Symbol;Acc:MGI:1914446]	1.53506	0.829498	17.7775	2.48307e-05	0.000176387
ENSMUSG00000058099	74039	Nfam1	Nfat activating molecule with ITAM motif 1 [Source:MGI Symbol;Acc:MGI:1921289]	-2.02191	1.12081	17.776	2.485e-05	0.000176435
ENSMUSG00000029392	75695	Rilpl1	Rab interacting lysosomal protein-like 1 [Source:MGI Symbol;Acc:MGI:1922945]	0.70697	4.67184	17.7714	2.49093e-05	0.000176767
ENSMUSG00000093930	208715	Hmgcs1	3-hydroxy-3-methylglutaryl-Coenzyme A synthase 1 [Source:MGI Symbol;Acc:MGI:107592]	0.895694	8.32176	17.7642	2.50042e-05	0.000177351
ENSMUSG00000029458	72399	Brap	BRCA1 associated protein [Source:MGI Symbol;Acc:MGI:1919649]	0.739633	4.38172	17.7606	2.50524e-05	0.000177603
ENSMUSG00000059991	53324	Nptx2	neuronal pentraxin 2 [Source:MGI Symbol;Acc:MGI:1858209]	1.40045	4.12251	17.756	2.51126e-05	0.00017794
ENSMUSG00000035606	16716	Ky	kyphoscoliosis peptidase [Source:MGI Symbol;Acc:MGI:96709]	-1.50781	1.06911	17.7473	2.52281e-05	0.000178668
ENSMUSG00000071547	70021	Nt5dc2	5'-nucleotidase domain containing 2 [Source:MGI Symbol;Acc:MGI:1917271]	-1.11178	3.19052	17.7437	2.52752e-05	0.000178912
ENSMUSG00000008318	320100	Relt	RELT tumor necrosis factor receptor [Source:MGI Symbol;Acc:MGI:2443373]	-0.904078	3.00988	17.7379	2.53528e-05	0.000179371
ENSMUSG00000029992	14583	Gfpt1	glutamine fructose-6-phosphate transaminase 1 [Source:MGI Symbol;Acc:MGI:95698]	-0.743332	5.30736	17.7275	2.54912e-05	0.000180176
ENSMUSG00000008206	67260	Cers4	ceramide synthase 4 [Source:MGI Symbol;Acc:MGI:1914510]	0.923514	6.59555	17.7274	2.54922e-05	0.000180176
ENSMUSG00000019689	66117	Fmc1	formation of mitochondrial complex V assembly factor 1 [Source:MGI Symbol;Acc:MGI:1913367]	-1.01626	4.62093	17.7121	2.56986e-05	0.000181543
ENSMUSG00000045532	23829	C1ql1	complement component 1, q subcomponent-like 1 [Source:MGI Symbol;Acc:MGI:1344400]	-1.92495	1.28973	17.6628	2.63739e-05	0.00018622
ENSMUSG00000057133	71389	Chd6	chromodomain helicase DNA binding protein 6 [Source:MGI Symbol;Acc:MGI:1918639]	-0.722743	5.71757	17.641	2.66768e-05	0.000188264
ENSMUSG00000022761	66863	Lztr1	leucine-zipper-like transcriptional regulator, 1 [Source:MGI Symbol;Acc:MGI:1914113]	0.567329	6.7247	17.6126	2.70783e-05	0.000191002
ENSMUSG00000027078	56791	Ube2l6	ubiquitin-conjugating enzyme E2L 6 [Source:MGI Symbol;Acc:MGI:1914500]	0.960246	2.77882	17.6073	2.71538e-05	0.000191439
ENSMUSG00000090110	105886298	Cmc4	C-x(9)-C motif containing 4 [Source:MGI Symbol;Acc:MGI:5637812]	-0.926855	2.66231	17.603	2.72162e-05	0.000191782
ENSMUSG00000097493	NA	9930014A18Rik	RIKEN cDNA 9930014A18 gene [Source:MGI Symbol;Acc:MGI:2444091]	1.3807	1.32813	17.5827	2.75085e-05	0.000193745
ENSMUSG00000040690	107581	Col16a1	collagen, type XVI, alpha 1 [Source:MGI Symbol;Acc:MGI:1095396]	1.85729	0.297148	17.5794	2.75551e-05	0.000193976
ENSMUSG00000035093	70354	Secisbp2l	SECIS binding protein 2-like [Source:MGI Symbol;Acc:MGI:1917604]	0.821777	7.20155	17.5748	2.76222e-05	0.000194351
ENSMUSG00000015852	80891	Fcrls	Fc receptor-like S, scavenger receptor [Source:MGI Symbol;Acc:MGI:1933397]	-1.83787	5.4901	17.5644	2.77741e-05	0.000195322
[truncated: 12,059 more rows]
