# Supplementary material for: The Differences in Local Translatome across Distinct Neuron Types Is Mediated by Both Baseline Cellular Differences and Post-transcriptional Mechanisms
Source: eNeuro. 2019 Feb 4;5(6):ENEURO.0320-18.2018. doi: 10.1523/ENEURO.0320-18.2018 (PMC6361723; doi:10.1523/ENEURO.0320-18.2018)
Supplement: Figure 3-2 — Table of VGAT local translation candidates. Full table of VGAT local translation candidates. Table of transcripts enriched by both cellular fractionation and by TRAP in VGAT-TRAP mice. Column names are as in Figure 2-1. Download Figure 3-2, XLS file. [file sup_enu-eN-NWR-0320-18-s06.xls]

## Sheet: Figure3-1_LocalTranslationCandi
ensembl_gene_id	entrezgene	external_gene_name	description	logFC_TRAP	LR_TRAP	PValue_TRAP	FDR_TRAP	logFC_Column	LR_Column	PValue_Column	FDR_Column
ENSMUSG00000000149	14673	Gna12	guanine nucleotide binding protein, alpha 12 [Source:MGI Symbol;Acc:MGI:95767]	0.969662	14.6457	0.000129728	0.000982198	0.687594	7.39979	0.00652315	0.0139737
ENSMUSG00000000530	11482	Acvrl1	activin A receptor, type II-like 1 [Source:MGI Symbol;Acc:MGI:1338946]	0.670981	4.72088	0.0297984	0.0892933	1.45851	20.4806	6.02389e-06	2.7657e-05
ENSMUSG00000000628	15277	Hk2	hexokinase 2 [Source:MGI Symbol;Acc:MGI:1315197]	1.12003	13.4628	0.000243344	0.00168869	0.781834	6.43045	0.011218	0.0225336
ENSMUSG00000000740	270106	Rpl13	ribosomal protein L13 [Source:MGI Symbol;Acc:MGI:105922]	1.11762	16.7452	4.27496e-05	0.000375447	0.688846	6.28631	0.0121674	0.0242183
ENSMUSG00000001768	74030	Rin2	Ras and Rab interactor 2 [Source:MGI Symbol;Acc:MGI:1921280]	0.524835	4.66887	0.0307142	0.0914444	1.18036	22.973	1.64293e-06	8.6047e-06
ENSMUSG00000001930	22371	Vwf	Von Willebrand factor [Source:MGI Symbol;Acc:MGI:98941]	1.37854	6.49817	0.0107986	0.0402472	1.92405	11.9321	0.00055174	0.00155791
ENSMUSG00000002205	101568	Vrk3	vaccinia related kinase 3 [Source:MGI Symbol;Acc:MGI:2182465]	0.645754	18.2048	1.98376e-05	0.000190849	0.385858	6.41941	0.011288	0.0226631
ENSMUSG00000002233	11853	Rhoc	ras homolog family member C [Source:MGI Symbol;Acc:MGI:106028]	0.942167	6.60633	0.0101617	0.0383512	0.868547	5.51768	0.0188252	0.0356001
ENSMUSG00000002274	70083	Metrn	meteorin, glial cell differentiation regulator [Source:MGI Symbol;Acc:MGI:1917333]	0.886626	4.18138	0.0408705	0.113855	1.53964	11.7097	0.000621747	0.00173177
ENSMUSG00000002968	75613	Med25	mediator complex subunit 25 [Source:MGI Symbol;Acc:MGI:1922863]	1.1801	15.7799	7.11539e-05	0.000584192	0.638678	4.39769	0.0359877	0.0627813
ENSMUSG00000003226	19386	Ranbp2	RAN binding protein 2 [Source:MGI Symbol;Acc:MGI:894323]	0.336123	6.16693	0.0130161	0.0467043	0.33327	6.03854	0.0139968	0.0274265
ENSMUSG00000003345	103236	Csnk1g2	casein kinase 1, gamma 2 [Source:MGI Symbol;Acc:MGI:1920014]	1.56071	43.8622	3.52326e-11	1.26034e-09	0.682913	8.4884	0.00357418	0.00821174
ENSMUSG00000003346	216169	Abhd17a	abhydrolase domain containing 17A [Source:MGI Symbol;Acc:MGI:106388]	1.46642	75.7339	3.2458e-18	5.24181e-16	0.486595	8.44432	0.00366186	0.00839083
ENSMUSG00000003378	14809	Grik5	glutamate receptor, ionotropic, kainate 5 (gamma 2) [Source:MGI Symbol;Acc:MGI:95818]	0.903274	33.9358	5.69604e-09	1.29614e-07	1.03987	43.1847	4.98099e-11	6.06988e-10
ENSMUSG00000003644	20111	Rps6ka1	ribosomal protein S6 kinase polypeptide 1 [Source:MGI Symbol;Acc:MGI:104558]	0.556712	4.09048	0.0431254	0.118242	0.799653	8.26233	0.00404761	0.00918024
ENSMUSG00000003810	17776	Mast2	microtubule associated serine/threonine kinase 2 [Source:MGI Symbol;Acc:MGI:894676]	1.15729	82.226	1.2138e-19	2.55573e-17	0.262414	4.28098	0.0385411	0.066607
ENSMUSG00000003863	76787	Ppfia3	protein tyrosine phosphatase, receptor type, f polypeptide (PTPRF), interacting protein (liprin), alpha 3 [Source:MGI Symbol;Acc:MGI:1924037]	1.29796	44.3308	2.77323e-11	1.0072e-09	0.527049	7.25894	0.00705489	0.0149711
ENSMUSG00000004187	16581	Kifc2	kinesin family member C2 [Source:MGI Symbol;Acc:MGI:109187]	1.04111	45.3562	1.64269e-11	6.29597e-10	0.662552	18.5167	1.68426e-05	6.92265e-05
ENSMUSG00000004266	15170	Ptpn6	protein tyrosine phosphatase, non-receptor type 6 [Source:MGI Symbol;Acc:MGI:96055]	1.1834	11.376	0.00074401	0.0043577	1.20279	11.248	0.000797078	0.00216361
ENSMUSG00000004366	20604	Sst	somatostatin [Source:MGI Symbol;Acc:MGI:98326]	0.665273	4.19957	0.0404341	0.113096	1.91042	32.6302	1.11467e-08	9.19256e-08
ENSMUSG00000004610	110826	Etfb	electron transferring flavoprotein, beta polypeptide [Source:MGI Symbol;Acc:MGI:106098]	0.538813	4.41838	0.0355538	0.102303	0.863385	11.1904	0.000822218	0.00222489
ENSMUSG00000004837	71520	Grap	GRB2-related adaptor protein [Source:MGI Symbol;Acc:MGI:1918770]	1.22743	6.63819	0.00998153	0.0377776	1.25041	6.55908	0.0104351	0.0211886
ENSMUSG00000004891	18008	Nes	nestin [Source:MGI Symbol;Acc:MGI:101784]	2.00397	25.7026	3.98296e-07	5.80145e-06	0.867913	4.49003	0.034093	0.0599412
ENSMUSG00000005442	71722	Cic	capicua transcriptional repressor [Source:MGI Symbol;Acc:MGI:1918972]	1.70621	94.3104	2.69729e-22	9.15647e-20	0.517646	8.79561	0.00301956	0.00706632
ENSMUSG00000005871	11789	Apc	adenomatosis polyposis coli [Source:MGI Symbol;Acc:MGI:88039]	0.887408	11.692	0.000627709	0.00377488	1.62977	38.0636	6.84745e-10	6.99634e-09
ENSMUSG00000006333	76846	Rps9	ribosomal protein S9 [Source:MGI Symbol;Acc:MGI:1924096]	0.498749	9.03909	0.00264267	0.0125954	0.662255	15.8501	6.85634e-05	0.000244006
ENSMUSG00000006435	18011	Neurl1a	neuralized E3 ubiquitin protein ligase 1A [Source:MGI Symbol;Acc:MGI:1334263]	2.04263	108.941	1.67173e-25	9.58879e-23	0.876721	21.1869	4.16611e-06	1.99038e-05
ENSMUSG00000006476	56876	Nsmf	NMDA receptor synaptonuclear signaling and neuronal migration factor [Source:MGI Symbol;Acc:MGI:1861755]	1.83876	92.6283	6.3099e-22	1.90834e-19	0.80511	18.5694	1.63832e-05	6.75723e-05
ENSMUSG00000006740	16573	Kif5b	kinesin family member 5B [Source:MGI Symbol;Acc:MGI:1098268]	1.08937	21.3004	3.92653e-06	4.56102e-05	1.13589	23.0843	1.55048e-06	8.18231e-06
ENSMUSG00000007379	329727	Dennd2c	DENN/MADD domain containing 2C [Source:MGI Symbol;Acc:MGI:3036254]	1.2182	6.45495	0.0110644	0.0410723	1.15423	5.1762	0.0228983	0.0422273
ENSMUSG00000007892	56040	Rplp1	ribosomal protein, large, P1 [Source:MGI Symbol;Acc:MGI:1927099]	0.413741	5.14118	0.0233647	0.0738756	0.813569	19.6419	9.33967e-06	4.07973e-05
ENSMUSG00000008028	69349	1700008O03Rik	RIKEN cDNA 1700008O03 gene [Source:MGI Symbol;Acc:MGI:1916599]	1.59949	39.3221	3.59354e-10	1.04319e-08	0.838914	10.8048	0.00101235	0.0026776
ENSMUSG00000008393	52502	Carhsp1	calcium regulated heat stable protein 1 [Source:MGI Symbol;Acc:MGI:1196368]	1.13322	22.8401	1.76058e-06	2.23042e-05	0.584466	6.13187	0.0132766	0.0261694
ENSMUSG00000008668	20084	Rps18	ribosomal protein S18 [Source:MGI Symbol;Acc:MGI:98146]	0.467247	5.89841	0.0151546	0.0527035	0.513089	7.07764	0.00780516	0.0164032
ENSMUSG00000008855	15184	Hdac5	histone deacetylase 5 [Source:MGI Symbol;Acc:MGI:1333784]	1.65275	127.094	1.77192e-29	2.67946e-26	0.635323	18.5898	1.62086e-05	6.69348e-05
ENSMUSG00000009075	192650	Cabp7	calcium binding protein 7 [Source:MGI Symbol;Acc:MGI:2183437]	2.04313	58.3671	2.17494e-14	1.6985e-12	0.557262	4.44477	0.0350083	0.0613429
ENSMUSG00000009739	19009	Pou6f1	POU domain, class 6, transcription factor 1 [Source:MGI Symbol;Acc:MGI:102935]	1.34084	103.371	2.77942e-24	1.401e-21	0.366964	7.88184	0.00499337	0.0110305
ENSMUSG00000011884	56356	Gltp	glycolipid transfer protein [Source:MGI Symbol;Acc:MGI:1929253]	1.15108	28.0126	1.20526e-07	2.01087e-06	0.512741	5.6143	0.0178145	0.0338931
ENSMUSG00000012017	224024	Scarf2	scavenger receptor class F, member 2 [Source:MGI Symbol;Acc:MGI:1858430]	1.483	13.2621	0.000270819	0.00184548	1.05756	5.52745	0.0187203	0.0354219
ENSMUSG00000012848	20103	Rps5	ribosomal protein S5 [Source:MGI Symbol;Acc:MGI:1097682]	0.646815	13.9932	0.000183469	0.00132343	0.573493	11.0039	0.000909182	0.00243493
ENSMUSG00000013076	75723	Amotl1	angiomotin-like 1 [Source:MGI Symbol;Acc:MGI:1922973]	1.23765	32.6957	1.07778e-08	2.29549e-07	0.512348	5.70281	0.0169378	0.0324216
ENSMUSG00000013419	270210	Zfp651	zinc finger protein 651 [Source:MGI Symbol;Acc:MGI:2670992]	1.70567	69.1477	9.13575e-17	1.13406e-14	0.521721	6.64061	0.00996795	0.020327
ENSMUSG00000013523	76960	Bcas1	breast carcinoma amplified sequence 1 [Source:MGI Symbol;Acc:MGI:1924210]	2.60102	49.9576	1.57101e-12	7.61873e-11	1.56329	19.3075	1.1127e-05	4.77027e-05
ENSMUSG00000013698	18611	Pea15a	phosphoprotein enriched in astrocytes 15A [Source:MGI Symbol;Acc:MGI:104799]	0.51655	6.43115	0.0112136	0.0414689	0.605556	8.81739	0.00298373	0.00699329
ENSMUSG00000014602	16560	Kif1a	kinesin family member 1A [Source:MGI Symbol;Acc:MGI:108391]	0.564318	6.88466	0.00869384	0.0338216	1.02394	22.3401	2.2839e-06	1.15613e-05
ENSMUSG00000014932	22612	Yes1	YES proto-oncogene 1, Src family tyrosine kinase [Source:MGI Symbol;Acc:MGI:99147]	0.767858	8.07888	0.00447841	0.0196037	0.979002	12.6873	0.000368149	0.00108539
ENSMUSG00000015149	64383	Sirt2	sirtuin 2 [Source:MGI Symbol;Acc:MGI:1927664]	1.81564	135.353	2.76437e-31	7.66375e-28	0.355761	5.47492	0.0192912	0.036378
ENSMUSG00000015305	70097	Sash1	SAM and SH3 domain containing 1 [Source:MGI Symbol;Acc:MGI:1917347]	1.07111	9.21098	0.00240568	0.0116597	1.43364	16.0679	6.11116e-05	0.000220362
ENSMUSG00000015468	18132	Notch4	notch 4 [Source:MGI Symbol;Acc:MGI:107471]	1.11043	6.77428	0.00924807	0.0354698	0.911048	4.13117	0.0421002	0.0719955
ENSMUSG00000015599	106763	Ttbk1	tau tubulin kinase 1 [Source:MGI Symbol;Acc:MGI:2147036]	1.99326	99.5381	1.92423e-23	7.80674e-21	0.72954	13.296	0.000265968	0.000812957
ENSMUSG00000015647	16776	Lama5	laminin, alpha 5 [Source:MGI Symbol;Acc:MGI:105382]	1.00972	4.63546	0.0313177	0.0927268	1.59171	10.1698	0.00142761	0.00363436
ENSMUSG00000015766	13860	Eps8	epidermal growth factor receptor pathway substrate 8 [Source:MGI Symbol;Acc:MGI:104684]	0.579731	4.88656	0.0270665	0.0829753	0.974405	13.5437	0.000233076	0.00072413
ENSMUSG00000015950	17969	Ncf1	neutrophil cytosolic factor 1 [Source:MGI Symbol;Acc:MGI:97283]	1.36717	7.39541	0.00653904	0.0266464	1.03068	4.1374	0.0419456	0.0718043
ENSMUSG00000017146	12189	Brca1	breast cancer 1, early onset [Source:MGI Symbol;Acc:MGI:104537]	1.17666	21.2633	4.00327e-06	4.63722e-05	0.979444	14.2455	0.000160442	0.000517855
ENSMUSG00000017724	18612	Etv4	ets variant 4 [Source:MGI Symbol;Acc:MGI:99423]	0.880108	8.04808	0.0045552	0.0198743	0.810087	6.35559	0.0117012	0.0233995
ENSMUSG00000018008	72318	Cyth4	cytohesin 4 [Source:MGI Symbol;Acc:MGI:2441702]	0.741694	8.2781	0.0040126	0.0179183	0.922143	12.431	0.000422266	0.00122497
ENSMUSG00000018042	109754	Cyb5r3	cytochrome b5 reductase 3 [Source:MGI Symbol;Acc:MGI:94893]	0.814725	18.8375	1.42343e-05	0.000143152	0.663322	12.3103	0.000450477	0.00129618
ENSMUSG00000019558	102857	Slc6a8	solute carrier family 6 (neurotransmitter transporter, creatine), member 8 [Source:MGI Symbol;Acc:MGI:2147834]	0.250741	3.84924	0.0497687	0.131509	0.416282	10.5707	0.00114897	0.00299702
ENSMUSG00000019820	22288	Utrn	utrophin [Source:MGI Symbol;Acc:MGI:104631]	1.20152	72.5158	1.657e-17	2.35577e-15	0.305848	4.76824	0.0289895	0.0520409
ENSMUSG00000019917	103080	2018-09-10	septin 10 [Source:MGI Symbol;Acc:MGI:1918110]	0.705006	4.66137	0.0308486	0.0916806	0.807671	6.00185	0.0142909	0.027904
ENSMUSG00000019978	13822	Epb41l2	erythrocyte membrane protein band 4.1 like 2 [Source:MGI Symbol;Acc:MGI:103009]	1.15308	25.737	3.91249e-07	5.7038e-06	0.905178	15.9379	6.54549e-05	0.000234045
ENSMUSG00000020021	13998	Fgd6	FYVE, RhoGEF and PH domain containing 6 [Source:MGI Symbol;Acc:MGI:1261419]	1.27286	6.04361	0.0139567	0.0494054	1.34809	6.69718	0.00965655	0.0197573
ENSMUSG00000020092	27355	Pald1	phosphatase domain containing, paladin 1 [Source:MGI Symbol;Acc:MGI:1351623]	0.665948	6.08108	0.0136637	0.0485542	0.835107	9.16886	0.00246168	0.00589598
ENSMUSG00000020135	23805	Apc2	adenomatosis polyposis coli 2 [Source:MGI Symbol;Acc:MGI:1346052]	0.659286	10.0372	0.0015341	0.00798191	1.67463	61.2643	4.99046e-15	1.15454e-13
ENSMUSG00000020143	94176	Dock2	dedicator of cyto-kinesis 2 [Source:MGI Symbol;Acc:MGI:2149010]	0.615152	5.34471	0.0207853	0.067541	1.47349	28.0007	1.21273e-07	8.13741e-07
ENSMUSG00000020154	19263	Ptprb	protein tyrosine phosphatase, receptor type, B [Source:MGI Symbol;Acc:MGI:97809]	1.08557	5.765	0.0163485	0.0560068	1.15827	6.44424	0.0111312	0.0223944
ENSMUSG00000020256	216188	Aldh1l2	aldehyde dehydrogenase 1 family, member L2 [Source:MGI Symbol;Acc:MGI:2444680]	0.710729	10.9663	0.00092783	0.00522993	0.77171	12.377	0.000434644	0.00125693
ENSMUSG00000020263	216190	Appl2	adaptor protein, phosphotyrosine interaction, PH domain and leucine zipper containing 2 [Source:MGI Symbol;Acc:MGI:2384914]	0.53759	5.69697	0.0169942	0.0578731	0.59078	6.84344	0.00889673	0.0183563
ENSMUSG00000020315	20742	Sptbn1	spectrin beta, non-erythrocytic 1 [Source:MGI Symbol;Acc:MGI:98388]	2.53886	13.3752	0.000254976	0.00175331	1.76816	6.85355	0.00884654	0.0182686
ENSMUSG00000020329	216151	Polrmt	polymerase (RNA) mitochondrial (DNA directed) [Source:MGI Symbol;Acc:MGI:1915843]	0.383151	5.87969	0.0153165	0.0531112	0.457551	8.22627	0.00412882	0.00934151
ENSMUSG00000020331	15166	Hcn2	hyperpolarization-activated, cyclic nucleotide-gated K+ 2 [Source:MGI Symbol;Acc:MGI:1298210]	0.835841	20.6081	5.63568e-06	6.34691e-05	1.39842	50.7787	1.03391e-12	1.61485e-11
ENSMUSG00000020393	84035	Kremen1	kringle containing transmembrane protein 1 [Source:MGI Symbol;Acc:MGI:1933988]	0.526462	4.58633	0.0322279	0.0947484	0.985552	14.7198	0.000124731	0.000415537
ENSMUSG00000020413	15574	Hus1	HUS1 checkpoint clamp component [Source:MGI Symbol;Acc:MGI:1277962]	0.500829	4.2797	0.0385702	0.108871	0.672457	7.59828	0.00584239	0.0126837
ENSMUSG00000020422	319939	Tns3	tensin 3 [Source:MGI Symbol;Acc:MGI:2443012]	1.71127	25.8152	3.75723e-07	5.51126e-06	1.57037	21.6713	3.23605e-06	1.58645e-05
ENSMUSG00000020431	432530	Adcy1	adenylate cyclase 1 [Source:MGI Symbol;Acc:MGI:99677]	0.709923	8.6732	0.00322923	0.0148713	1.10485	20.708	5.3492e-06	2.48683e-05
ENSMUSG00000020532	107476	Acaca	acetyl-Coenzyme A carboxylase alpha [Source:MGI Symbol;Acc:MGI:108451]	0.911309	23.606	1.18218e-06	1.54715e-05	0.417757	4.92487	0.0264727	0.047942
ENSMUSG00000020661	13435	Dnmt3a	DNA methyltransferase 3A [Source:MGI Symbol;Acc:MGI:1261827]	0.414722	6.06571	0.0137831	0.048895	0.372411	4.89098	0.0269973	0.048807
ENSMUSG00000020684	276952	Rasl10b	RAS-like, family 10, member B [Source:MGI Symbol;Acc:MGI:2685575]	2.21202	130.842	2.6818e-30	5.57614e-27	1.43062	56.8246	4.76476e-14	9.36844e-13
ENSMUSG00000020716	18015	Nf1	neurofibromin 1 [Source:MGI Symbol;Acc:MGI:97306]	0.539285	7.7996	0.00522579	0.0222119	0.591985	9.31509	0.00227275	0.00547658
ENSMUSG00000020723	54377	Cacng4	calcium channel, voltage-dependent, gamma subunit 4 [Source:MGI Symbol;Acc:MGI:1859167]	0.402208	5.00067	0.0253375	0.0789109	1.14433	39.3354	3.56907e-10	3.80807e-09
ENSMUSG00000020734	14813	Grin2c	glutamate receptor, ionotropic, NMDA2C (epsilon 3) [Source:MGI Symbol;Acc:MGI:95822]	0.697272	3.87486	0.0490144	0.130145	2.1555	33.705	6.41341e-09	5.51607e-08
ENSMUSG00000020821	16562	Kif1c	kinesin family member 1C [Source:MGI Symbol;Acc:MGI:1098260]	1.03155	8.85911	0.00291629	0.0136416	1.80936	25.8761	3.64055e-07	2.21334e-06
ENSMUSG00000020828	18806	Pld2	phospholipase D2 [Source:MGI Symbol;Acc:MGI:892877]	0.638852	10.8273	0.00100016	0.0055903	0.513096	6.88753	0.00867993	0.0179818
ENSMUSG00000020844	18230	Nxn	nucleoredoxin [Source:MGI Symbol;Acc:MGI:109331]	0.743938	5.63652	0.0175901	0.0595067	0.695401	4.85373	0.0275864	0.0497531
ENSMUSG00000020932	14580	Gfap	glial fibrillary acidic protein [Source:MGI Symbol;Acc:MGI:95697]	1.31918	7.50106	0.00616626	0.0254199	1.60523	10.9276	0.000947412	0.00252593
ENSMUSG00000020937	72469	Plcd3	phospholipase C, delta 3 [Source:MGI Symbol;Acc:MGI:107451]	1.7951	80.0769	3.60114e-19	6.88521e-17	0.442171	4.5495	0.0329283	0.058096
ENSMUSG00000021061	20741	Sptb	spectrin beta, erythrocytic [Source:MGI Symbol;Acc:MGI:98387]	2.70081	30.4741	3.38352e-08	6.47657e-07	1.18827	6.47714	0.010927	0.022031
ENSMUSG00000021277	22031	Traf3	TNF receptor-associated factor 3 [Source:MGI Symbol;Acc:MGI:108041]	1.78618	107.281	3.86328e-25	2.00818e-22	1.08712	40.5106	1.95555e-10	2.17728e-09
ENSMUSG00000021278	93835	Amn	amnionless [Source:MGI Symbol;Acc:MGI:1934943]	0.662314	11.9108	0.000558107	0.00341433	0.701632	12.6088	0.000383925	0.00112651
ENSMUSG00000021367	13614	Edn1	endothelin 1 [Source:MGI Symbol;Acc:MGI:95283]	1.12812	5.06978	0.0243465	0.0764545	1.28327	6.03554	0.0140206	0.0274667
ENSMUSG00000021379	15904	Id4	inhibitor of DNA binding 4 [Source:MGI Symbol;Acc:MGI:99414]	0.704221	6.35994	0.0116726	0.0428121	0.571154	4.16817	0.0411902	0.0706566
ENSMUSG00000021448	20418	Shc3	src homology 2 domain-containing transforming protein C3 [Source:MGI Symbol;Acc:MGI:106179]	1.37643	41.2437	1.34384e-10	4.23362e-09	0.736461	11.2122	0.000812599	0.00220119
ENSMUSG00000021540	17129	Smad5	SMAD family member 5 [Source:MGI Symbol;Acc:MGI:1328787]	0.666336	9.12534	0.00252093	0.0121229	0.539022	5.95416	0.0146826	0.0285883
ENSMUSG00000021589	73296	Rhobtb3	Rho-related BTB domain containing 3 [Source:MGI Symbol;Acc:MGI:1920546]	0.621025	9.18571	0.00243911	0.0118029	0.470557	5.2398	0.0220759	0.0409
ENSMUSG00000021709	59079	Erbin	Erbb2 interacting protein [Source:MGI Symbol;Acc:MGI:1890169]	1.26321	24.0647	9.31527e-07	1.25364e-05	0.919235	12.7753	0.000351227	0.00103956
ENSMUSG00000021782	71228	Dlg5	discs, large homolog 5 (Drosophila) [Source:MGI Symbol;Acc:MGI:1918478]	0.964056	26.2035	3.07266e-07	4.60871e-06	0.545942	8.35238	0.00385183	0.00877689
ENSMUSG00000021794	14661	Glud1	glutamate dehydrogenase 1 [Source:MGI Symbol;Acc:MGI:95753]	0.911298	10.199	0.00140518	0.00741554	0.9778	11.7001	0.000624958	0.00173926
ENSMUSG00000021957	21881	Tkt	transketolase [Source:MGI Symbol;Acc:MGI:105992]	0.300463	4.39631	0.0360168	0.103296	0.541104	14.1794	0.000166181	0.00053467
ENSMUSG00000021998	18826	Lcp1	lymphocyte cytosolic protein 1 [Source:MGI Symbol;Acc:MGI:104808]	1.61759	25.2885	4.93642e-07	7.04827e-06	0.980875	9.44385	0.00211859	0.00515514
ENSMUSG00000022090	213019	Pdlim2	PDZ and LIM domain 2 [Source:MGI Symbol;Acc:MGI:2384850]	2.09368	62.3713	2.84433e-15	2.62847e-13	0.757492	8.67674	0.00322297	0.00749174
ENSMUSG00000022148	23880	Fyb	FYN binding protein [Source:MGI Symbol;Acc:MGI:1346327]	0.762435	8.16154	0.0042788	0.0188789	1.60446	33.7327	6.32281e-09	5.44659e-08
ENSMUSG00000022220	104110	Adcy4	adenylate cyclase 4 [Source:MGI Symbol;Acc:MGI:99674]	1.86696	5.90928	0.0150614	0.0524471	2.09967	6.53942	0.010551	0.0213939
ENSMUSG00000022272	17909	Myo10	myosin X [Source:MGI Symbol;Acc:MGI:107716]	1.57578	12.4485	0.000418326	0.00267735	1.4004	9.87715	0.00167344	0.00417832
ENSMUSG00000022283	18458	Pabpc1	poly(A) binding protein, cytoplasmic 1 [Source:MGI Symbol;Acc:MGI:1349722]	0.695315	17.6466	2.65993e-05	0.000248708	0.546017	10.8879	0.00096797	0.00257496
ENSMUSG00000022383	19013	Ppara	peroxisome proliferator activated receptor alpha [Source:MGI Symbol;Acc:MGI:104740]	0.971783	7.78036	0.00528171	0.0224065	1.13275	9.70623	0.00183644	0.00454033
ENSMUSG00000022390	20286	Zc3h7b	zinc finger CCCH type containing 7B [Source:MGI Symbol;Acc:MGI:1328310]	1.5634	64.3862	1.02275e-15	1.03734e-13	0.734415	14.5719	0.000134913	0.000444737
ENSMUSG00000022416	239556	Cacna1i	calcium channel, voltage-dependent, alpha 1I subunit [Source:MGI Symbol;Acc:MGI:2178051]	0.373949	4.20157	0.0403867	0.113001	1.62231	74.299	6.71386e-18	2.52666e-16
ENSMUSG00000022439	64099	Parvg	parvin, gamma [Source:MGI Symbol;Acc:MGI:2158329]	0.718814	6.423	0.0112652	0.0416023	1.32313	20.4144	6.23604e-06	2.84817e-05
ENSMUSG00000022488	105855	Nckap1l	NCK associated protein 1 like [Source:MGI Symbol;Acc:MGI:1926063]	0.695254	6.19741	0.0127937	0.0460908	1.19259	17.5946	2.73358e-05	0.000106864
ENSMUSG00000022537	224090	Tmem44	transmembrane protein 44 [Source:MGI Symbol;Acc:MGI:1924489]	0.582254	17.3851	3.05209e-05	0.000280644	0.656057	21.8277	2.98262e-06	1.47132e-05
ENSMUSG00000022562	75475	Oplah	5-oxoprolinase (ATP-hydrolysing) [Source:MGI Symbol;Acc:MGI:1922725]	0.87784	8.49791	0.00355555	0.0161021	0.861235	7.65236	0.0056698	0.0123655
ENSMUSG00000022568	105782	Scrib	scribbled planar cell polarity [Source:MGI Symbol;Acc:MGI:2145950]	1.49796	29.4423	5.76051e-08	1.03814e-06	0.660601	5.25456	0.0218893	0.0406098
ENSMUSG00000022574	223646	Naprt	nicotinate phosphoribosyltransferase [Source:MGI Symbol;Acc:MGI:2442664]	0.767684	4.33026	0.0374406	0.106314	1.31871	11.8052	0.000590662	0.00165545
ENSMUSG00000022575	69146	Gsdmd	gasdermin D [Source:MGI Symbol;Acc:MGI:1916396]	1.16896	6.45733	0.0110495	0.0410355	1.00941	4.382	0.0363203	0.0632753
ENSMUSG00000022594	23936	Lynx1	Ly6/neurotoxin 1 [Source:MGI Symbol;Acc:MGI:1345180]	0.341165	4.41873	0.0355465	0.102303	1.09525	44.5327	2.50138e-11	3.19978e-10
ENSMUSG00000022619	60597	Mapk8ip2	mitogen-activated protein kinase 8 interacting protein 2 [Source:MGI Symbol;Acc:MGI:1926555]	2.07944	29.2974	6.20799e-08	1.11071e-06	1.10016	8.66029	0.0032522	0.00755076
ENSMUSG00000022623	58234	Shank3	SH3/ankyrin domain gene 3 [Source:MGI Symbol;Acc:MGI:1930016]	2.42994	114.352	1.09117e-26	7.56273e-24	1.25246	31.4267	2.07117e-08	1.62279e-07
ENSMUSG00000022708	56490	Zbtb20	zinc finger and BTB domain containing 20 [Source:MGI Symbol;Acc:MGI:1929213]	0.906489	11.4687	0.00070779	0.00417792	0.650035	5.93921	0.0148076	0.0288048
ENSMUSG00000022791	51789	Tnk2	tyrosine kinase, non-receptor, 2 [Source:MGI Symbol;Acc:MGI:1858308]	1.83264	57.546	3.30166e-14	2.48506e-12	0.46996	3.92519	0.0475679	0.0800088
ENSMUSG00000022831	15163	Hcls1	hematopoietic cell specific Lyn substrate 1 [Source:MGI Symbol;Acc:MGI:104568]	0.882081	5.03185	0.0248853	0.077718	1.47948	13.1333	0.000290086	0.000877326
ENSMUSG00000022840	224129	Adcy5	adenylate cyclase 5 [Source:MGI Symbol;Acc:MGI:99673]	0.818089	20.6839	5.41691e-06	6.12126e-05	1.13221	39.029	4.1756e-10	4.39879e-09
ENSMUSG00000023008	22379	Fmnl3	formin-like 3 [Source:MGI Symbol;Acc:MGI:109569]	1.11701	14.0056	0.000182267	0.00131704	0.839167	7.64809	0.00568324	0.0123915
ENSMUSG00000023495	59092	Pcbp4	poly(rC) binding protein 4 [Source:MGI Symbol;Acc:MGI:1890471]	1.56299	85.1502	2.76533e-20	6.30117e-18	0.362212	4.41514	0.0356213	0.0622335
ENSMUSG00000024013	26382	Fgd2	FYVE, RhoGEF and PH domain containing 2 [Source:MGI Symbol;Acc:MGI:1347084]	1.45845	25.764	3.85812e-07	5.64433e-06	0.959906	9.99609	0.00156873	0.00395127
ENSMUSG00000024019	74157	Cmtr1	cap methyltransferase 1 [Source:MGI Symbol;Acc:MGI:1921407]	0.417464	7.75913	0.00534418	0.0226282	0.312243	4.30554	0.0379884	0.0657748
ENSMUSG00000024070	75292	Prkd3	protein kinase D3 [Source:MGI Symbol;Acc:MGI:1922542]	0.814887	10.9003	0.000961489	0.00539771	0.576054	5.4372	0.0197123	0.0370375
ENSMUSG00000024140	13819	Epas1	endothelial PAS domain protein 1 [Source:MGI Symbol;Acc:MGI:109169]	1.2014	10.5062	0.00118975	0.00646322	1.70209	20.4245	6.20295e-06	2.83695e-05
ENSMUSG00000024180	60455	Tmem8	transmembrane protein 8 (five membrane-spanning domains) [Source:MGI Symbol;Acc:MGI:1926283]	0.290134	3.85123	0.0497096	0.131374	0.921135	36.9287	1.22531e-09	1.19541e-08
ENSMUSG00000024212	64144	Mllt1	myeloid/lymphoid or mixed-lineage leukemia; translocated to, 1 [Source:MGI Symbol;Acc:MGI:1927238]	1.74455	100.521	1.17126e-23	4.9956e-21	0.498555	8.39159	0.00376961	0.00861078
ENSMUSG00000024220	224656	Zfp523	zinc finger protein 523 [Source:MGI Symbol;Acc:MGI:2687278]	2.01568	123.826	9.19547e-29	1.01972e-25	0.612222	11.5027	0.00069494	0.00191226
ENSMUSG00000024236	225115	Svil	supervillin [Source:MGI Symbol;Acc:MGI:2147319]	1.89546	15.4377	8.5269e-05	0.000683549	0.948955	3.97081	0.0462956	0.0782284
ENSMUSG00000024300	17916	Myo1f	myosin IF [Source:MGI Symbol;Acc:MGI:107711]	1.2317	12.7091	0.000363881	0.00237458	0.753354	4.46953	0.0345045	0.0605877
ENSMUSG00000024338	16913	Psmb8	proteasome (prosome, macropain) subunit, beta type 8 (large multifunctional peptidase 7) [Source:MGI Symbol;Acc:MGI:1346527]	1.3191	8.67884	0.00321926	0.0148295	1.09975	5.76202	0.0163762	0.0314768
ENSMUSG00000024393	53761	Prrc2a	proline-rich coiled-coil 2A [Source:MGI Symbol;Acc:MGI:1915467]	1.31797	80.809	2.48629e-19	4.98276e-17	0.454813	9.49713	0.00205793	0.00502299
ENSMUSG00000024395	225341	Lims2	LIM and senescent cell antigen like domains 2 [Source:MGI Symbol;Acc:MGI:2385067]	0.74266	7.92151	0.00488505	0.0210404	0.563549	4.56233	0.0326826	0.0577237
ENSMUSG00000024451	106952	Arap3	ArfGAP with RhoGAP domain, ankyrin repeat and PH domain 3 [Source:MGI Symbol;Acc:MGI:2147274]	1.65126	18.2785	1.90854e-05	0.000184252	0.835739	4.46777	0.03454	0.0606373
ENSMUSG00000024456	13367	Diaph1	diaphanous related formin 1 [Source:MGI Symbol;Acc:MGI:1194490]	1.70935	103.285	2.90191e-24	1.41972e-21	0.56135	11.396	0.000736018	0.00201596
ENSMUSG00000024565	20689	Sall3	sal-like 3 (Drosophila) [Source:MGI Symbol;Acc:MGI:109295]	0.49611	5.54408	0.0185433	0.0618631	0.529731	6.16927	0.0129988	0.0256888
ENSMUSG00000024608	20044	Rps14	ribosomal protein S14 [Source:MGI Symbol;Acc:MGI:98107]	0.39197	4.73434	0.0295662	0.0888214	0.50942	7.97579	0.00474071	0.0105339
ENSMUSG00000024617	12322	Camk2a	calcium/calmodulin-dependent protein kinase II alpha [Source:MGI Symbol;Acc:MGI:88256]	1.61237	26.2305	3.03005e-07	4.5489e-06	0.850651	7.55967	0.0059689	0.0129212
ENSMUSG00000024640	107272	Psat1	phosphoserine aminotransferase 1 [Source:MGI Symbol;Acc:MGI:2183441]	0.503923	5.05594	0.0245417	0.0768645	0.924328	16.791	4.17309e-05	0.000157165
ENSMUSG00000024661	14319	Fth1	ferritin heavy polypeptide 1 [Source:MGI Symbol;Acc:MGI:95588]	0.703447	5.97648	0.0144979	0.0508988	0.685523	5.67766	0.0171822	0.0328403
ENSMUSG00000024769	240505	Cdc42bpg	CDC42 binding protein kinase gamma (DMPK-like) [Source:MGI Symbol;Acc:MGI:2652845]	1.90854	29.7734	4.85615e-08	8.93553e-07	1.43814	13.501	0.000238431	0.000738697
ENSMUSG00000024782	56248	Ak3	adenylate kinase 3 [Source:MGI Symbol;Acc:MGI:1860835]	0.504835	4.11658	0.0424649	0.117051	0.599279	5.78133	0.0161973	0.0311799
ENSMUSG00000024873	12794	Cnih2	cornichon family AMPA receptor auxiliary protein 2 [Source:MGI Symbol;Acc:MGI:1277225]	0.905447	35.8505	2.13054e-09	5.28947e-08	0.841458	30.5111	3.31953e-08	2.48838e-07
ENSMUSG00000024892	18563	Pcx	pyruvate carboxylase [Source:MGI Symbol;Acc:MGI:97520]	0.882765	11.3274	0.000763728	0.00444968	0.585114	4.98206	0.0256115	0.0465495
ENSMUSG00000024952	56613	Rps6ka4	ribosomal protein S6 kinase, polypeptide 4 [Source:MGI Symbol;Acc:MGI:1930076]	1.49221	59.9755	9.60445e-15	7.98802e-13	0.481624	5.98549	0.014424	0.0281442
ENSMUSG00000024962	22340	Vegfb	vascular endothelial growth factor B [Source:MGI Symbol;Acc:MGI:106199]	0.618716	5.80919	0.0159427	0.0548821	1.02393	15.493	8.28115e-05	0.000288571
ENSMUSG00000024990	19662	Rbp4	retinol binding protein 4, plasma [Source:MGI Symbol;Acc:MGI:97879]	0.501664	4.83958	0.0278136	0.0847502	1.47064	39.5182	3.25014e-10	3.48792e-09
ENSMUSG00000024998	74055	Plce1	phospholipase C, epsilon 1 [Source:MGI Symbol;Acc:MGI:1921305]	0.960761	17.4131	3.00753e-05	0.000277466	0.999244	17.904	2.32334e-05	9.24112e-05
ENSMUSG00000025006	20411	Sorbs1	sorbin and SH3 domain containing 1 [Source:MGI Symbol;Acc:MGI:700014]	0.49443	7.85193	0.00507666	0.0217083	0.891908	25.1182	5.39203e-07	3.15702e-06
ENSMUSG00000025026	27360	Add3	adducin 3 (gamma) [Source:MGI Symbol;Acc:MGI:1351615]	0.494689	4.69274	0.0302902	0.0905033	0.628446	7.54035	0.00603323	0.0130266
ENSMUSG00000025034	93679	Trim8	tripartite motif-containing 8 [Source:MGI Symbol;Acc:MGI:1933302]	0.840345	18.3478	1.84029e-05	0.000178597	0.498921	6.4871	0.010866	0.0219245
ENSMUSG00000025261	59026	Huwe1	HECT, UBA and WWE domain containing 1 [Source:MGI Symbol;Acc:MGI:1926884]	0.473716	11.4499	0.000714963	0.00421428	0.56511	16.2318	5.60452e-05	0.000204129
ENSMUSG00000025290	20088	Rps24	ribosomal protein S24 [Source:MGI Symbol;Acc:MGI:98147]	0.477413	5.92052	0.0149655	0.0521879	0.422297	4.62795	0.0314552	0.0558643
ENSMUSG00000025318	57340	Jph3	junctophilin 3 [Source:MGI Symbol;Acc:MGI:1891497]	1.58463	96.7458	7.88233e-23	2.78968e-20	0.489318	9.4512	0.00211011	0.00513753
ENSMUSG00000025362	27370	Rps26	ribosomal protein S26 [Source:MGI Symbol;Acc:MGI:1351628]	0.420203	5.13868	0.0233985	0.0739521	0.487196	6.881	0.00871169	0.0180371
ENSMUSG00000025375	11302	Aatk	apoptosis-associated tyrosine kinase [Source:MGI Symbol;Acc:MGI:1197518]	0.878639	29.0471	7.06389e-08	1.24603e-06	0.776336	22.4293	2.18028e-06	1.10874e-05
ENSMUSG00000025400	21334	Tac2	tachykinin 2 [Source:MGI Symbol;Acc:MGI:98476]	0.60524	5.04505	0.0246965	0.0772838	1.68262	36.7425	1.3481e-09	1.30487e-08
ENSMUSG00000025422	216439	Agap2	ArfGAP with GTPase domain, ankyrin repeat and PH domain 2 [Source:MGI Symbol;Acc:MGI:3580016]	1.7023	68.5299	1.24969e-16	1.48882e-14	0.783237	14.8867	0.000114163	0.000384333
ENSMUSG00000025555	223254	Farp1	FERM, RhoGEF (Arhgef) and pleckstrin domain protein 1 (chondrocyte-derived) [Source:MGI Symbol;Acc:MGI:2446173]	0.654361	13.6116	0.000224791	0.00158038	0.563429	10.0345	0.00153633	0.00387907
ENSMUSG00000025650	12836	Col7a1	collagen, type VII, alpha 1 [Source:MGI Symbol;Acc:MGI:88462]	1.37519	5.60345	0.0179251	0.0603453	1.48735	4.94621	0.026148	0.0474313
ENSMUSG00000025702	71779	2018-03-08	membrane-associated ring finger (C3HC4) 8 [Source:MGI Symbol;Acc:MGI:1919029]	0.909482	25.8576	3.67547e-07	5.40564e-06	0.379146	4.51338	0.0336307	0.0592034
ENSMUSG00000025738	214931	Fbxl16	F-box and leucine-rich repeat protein 16 [Source:MGI Symbol;Acc:MGI:2448488]	1.41147	60.6995	6.64867e-15	5.58556e-13	0.383733	4.63766	0.0312776	0.0556143
ENSMUSG00000025794	67115	Rpl14	ribosomal protein L14 [Source:MGI Symbol;Acc:MGI:1914365]	0.545891	11.6261	0.000650312	0.00388831	0.407222	6.46294	0.0110147	0.0221841
ENSMUSG00000025813	26557	Homer2	homer scaffolding protein 2 [Source:MGI Symbol;Acc:MGI:1347354]	1.36775	54.3097	1.71252e-13	1.05896e-11	0.563353	9.42929	0.00213547	0.00518864
ENSMUSG00000025877	212032	Hk3	hexokinase 3 [Source:MGI Symbol;Acc:MGI:2670962]	1.05867	6.142	0.0132008	0.0472524	0.961247	4.59471	0.0320708	0.056812
ENSMUSG00000025950	15926	Idh1	isocitrate dehydrogenase 1 (NADP+), soluble [Source:MGI Symbol;Acc:MGI:96413]	0.689912	13.4454	0.000245602	0.00170081	0.459064	5.97019	0.0145498	0.0283562
ENSMUSG00000026003	11363	Acadl	acyl-Coenzyme A dehydrogenase, long-chain [Source:MGI Symbol;Acc:MGI:87866]	1.0505	12.4765	0.000412108	0.00264366	1.14074	14.5836	0.00013408	0.00044234
ENSMUSG00000026028	70827	Trak2	trafficking protein, kinesin binding 2 [Source:MGI Symbol;Acc:MGI:1918077]	1.27471	58.1591	2.41748e-14	1.87908e-12	0.863309	26.9731	2.06309e-07	1.32602e-06
ENSMUSG00000026029	12370	Casp8	caspase 8 [Source:MGI Symbol;Acc:MGI:1261423]	0.678619	4.33743	0.0372831	0.106021	0.924283	7.65819	0.00565152	0.0123304
ENSMUSG00000026031	12633	Cflar	CASP8 and FADD-like apoptosis regulator [Source:MGI Symbol;Acc:MGI:1336166]	0.55002	5.99376	0.0143566	0.0504985	1.15323	25.459	4.51892e-07	2.69419e-06
ENSMUSG00000026074	26921	Map4k4	mitogen-activated protein kinase kinase kinase kinase 4 [Source:MGI Symbol;Acc:MGI:1349394]	2.08441	63.9489	1.27691e-15	1.27952e-13	0.892805	12.3854	0.000432702	0.00125197
ENSMUSG00000026131	13518	Dst	dystonin [Source:MGI Symbol;Acc:MGI:104627]	2.10329	19.6634	9.23523e-06	9.77841e-05	1.53387	10.831	0.000998168	0.00264387
ENSMUSG00000026207	11790	Speg	SPEG complex locus [Source:MGI Symbol;Acc:MGI:109282]	1.39854	122.055	2.24489e-28	2.33384e-25	0.512438	16.1904	5.72844e-05	0.000208141
ENSMUSG00000026288	16331	Inpp5d	inositol polyphosphate-5-phosphatase D [Source:MGI Symbol;Acc:MGI:107357]	1.06658	17.7584	2.50806e-05	0.000235568	0.832531	10.6082	0.00112586	0.00294366
ENSMUSG00000026786	54519	Apbb1ip	amyloid beta (A4) precursor protein-binding, family B, member 1 interacting protein [Source:MGI Symbol;Acc:MGI:1861354]	1.50609	42.6778	6.45414e-11	2.21814e-09	0.718335	9.07364	0.0025932	0.00617697
ENSMUSG00000026811	50935	St6galnac6	ST6 (alpha-N-acetyl-neuraminyl-2,3-beta-galactosyl-1,3)-N-acetylgalactosaminide alpha-2,6-sialyltransferase 6 [Source:MGI Symbol;Acc:MGI:1355316]	1.10293	32.9273	9.56713e-09	2.07213e-07	0.65607	11.6721	0.00063444	0.00176211
ENSMUSG00000026814	13805	Eng	endoglin [Source:MGI Symbol;Acc:MGI:95392]	1.68414	8.21235	0.00416062	0.0184358	1.36666	5.05229	0.0245935	0.0449251
ENSMUSG00000026858	108958	Miga2	mitoguardin 2 [Source:MGI Symbol;Acc:MGI:1922035]	0.333949	5.57187	0.0182512	0.061115	1.05926	54.2511	1.76442e-13	3.1729e-12
ENSMUSG00000026879	227753	Gsn	gelsolin [Source:MGI Symbol;Acc:MGI:95851]	1.76358	6.86511	0.00878949	0.0341201	2.17107	10.1183	0.00146801	0.00372411
ENSMUSG00000026883	69601	Dab2ip	disabled 2 interacting protein [Source:MGI Symbol;Acc:MGI:1916851]	1.87288	94.4447	2.52032e-22	8.73397e-20	0.383235	4.0928	0.0430662	0.0734129
ENSMUSG00000026932	67991	Nacc2	nucleus accumbens associated 2, BEN and BTB (POZ) domain containing [Source:MGI Symbol;Acc:MGI:1915241]	1.20612	14.5684	0.000135162	0.0010187	1.55795	23.7774	1.08145e-06	5.91736e-06
ENSMUSG00000026979	215632	Psd4	pleckstrin and Sec7 domain containing 4 [Source:MGI Symbol;Acc:MGI:2674093]	0.751481	4.31454	0.0377879	0.107117	0.8375	4.63495	0.031327	0.0556754
ENSMUSG00000027333	228608	Smox	spermine oxidase [Source:MGI Symbol;Acc:MGI:2445356]	0.802277	8.83224	0.00295955	0.0137974	0.563553	4.348	0.0370524	0.0643486
ENSMUSG00000027339	215653	Rassf2	Ras association (RalGDS/AF-6) domain family member 2 [Source:MGI Symbol;Acc:MGI:2442060]	0.612841	5.16698	0.0230202	0.0730354	1.1819	18.7707	1.47414e-05	6.1502e-05
ENSMUSG00000027435	17064	Cd93	CD93 antigen [Source:MGI Symbol;Acc:MGI:106664]	0.825156	4.84237	0.0277687	0.0846444	1.26752	10.7857	0.00102287	0.00270371
ENSMUSG00000027457	241727	Snph	syntaphilin [Source:MGI Symbol;Acc:MGI:2139270]	1.7049	81.5815	1.6818e-19	3.4116e-17	0.893518	23.2127	1.45034e-06	7.70271e-06
ENSMUSG00000027517	70065	Ankrd60	ankyrin repeat domain 60 [Source:MGI Symbol;Acc:MGI:1917315]	1.07559	13.464	0.00024318	0.00168826	0.923253	8.9039	0.00284562	0.00670528
ENSMUSG00000027525	74189	Phactr3	phosphatase and actin regulator 3 [Source:MGI Symbol;Acc:MGI:1921439]	1.10741	36.2478	1.73757e-09	4.36596e-08	0.364107	3.98105	0.0460149	0.0778281
ENSMUSG00000027624	13821	Epb41l1	erythrocyte membrane protein band 4.1 like 1 [Source:MGI Symbol;Acc:MGI:103010]	1.45313	61.4272	4.59413e-15	4.04332e-13	0.441104	5.86074	0.0154823	0.0299491
ENSMUSG00000027875	15360	Hmgcs2	3-hydroxy-3-methylglutaryl-Coenzyme A synthase 2 [Source:MGI Symbol;Acc:MGI:101939]	0.713612	4.40479	0.0358382	0.102924	1.21777	12.3387	0.000443655	0.00127943
ENSMUSG00000028081	20091	Rps3a1	ribosomal protein S3A1 [Source:MGI Symbol;Acc:MGI:1202063]	0.605015	14.2526	0.000159844	0.00117648	0.386154	5.79833	0.0160414	0.0309156
ENSMUSG00000028234	67427	Rps20	ribosomal protein S20 [Source:MGI Symbol;Acc:MGI:1914677]	0.360971	5.25639	0.0218663	0.0702847	0.538197	11.598	0.000660227	0.00182285
ENSMUSG00000028354	54418	Fmn2	formin 2 [Source:MGI Symbol;Acc:MGI:1859252]	0.540183	8.31654	0.00392857	0.0175761	0.633892	11.3969	0.000735674	0.00201535
ENSMUSG00000028541	53418	B4galt2	UDP-Gal:betaGlcNAc beta 1,4- galactosyltransferase, polypeptide 2 [Source:MGI Symbol;Acc:MGI:1858493]	1.28027	68.0006	1.63449e-16	1.84953e-14	0.802455	26.8391	2.21114e-07	1.40705e-06
ENSMUSG00000028607	12896	Cpt2	carnitine palmitoyltransferase 2 [Source:MGI Symbol;Acc:MGI:109176]	0.615378	5.18462	0.0227876	0.0725453	0.66551	5.91357	0.0150247	0.0291657
ENSMUSG00000028631	60613	Kcnq4	potassium voltage-gated channel, subfamily Q, member 4 [Source:MGI Symbol;Acc:MGI:1926803]	1.20103	31.7096	1.79032e-08	3.61411e-07	1.03178	20.9934	4.60868e-06	2.17663e-05
ENSMUSG00000028649	11426	Macf1	microtubule-actin crosslinking factor 1 [Source:MGI Symbol;Acc:MGI:108559]	2.25344	21.2824	3.96347e-06	4.59431e-05	1.23637	6.8084	0.00907299	0.0186852
ENSMUSG00000028737	212647	Aldh4a1	aldehyde dehydrogenase 4 family, member A1 [Source:MGI Symbol;Acc:MGI:2443883]	0.772049	6.78162	0.00921013	0.0353896	0.848804	8.08445	0.00446466	0.00998992
ENSMUSG00000028868	242687	Wasf2	WAS protein family, member 2 [Source:MGI Symbol;Acc:MGI:1098641]	1.17597	18.9829	1.31897e-05	0.000133535	0.638781	5.5349	0.0186409	0.0352916
ENSMUSG00000028917	69582	Plekhm2	pleckstrin homology domain containing, family M (with RUN domain) member 2 [Source:MGI Symbol;Acc:MGI:1916832]	1.45408	35.5562	2.47796e-09	6.00852e-08	0.791651	10.4125	0.00125168	0.00323198
ENSMUSG00000028919	213649	Arhgef19	Rho guanine nucleotide exchange factor (GEF) 19 [Source:MGI Symbol;Acc:MGI:1925912]	0.880778	4.92206	0.0265158	0.0816936	0.844636	4.26839	0.0388278	0.0670398
ENSMUSG00000028923	66147	Necap2	NECAP endocytosis associated 2 [Source:MGI Symbol;Acc:MGI:1913397]	1.00775	12.0083	0.000529644	0.003263	0.886854	9.02622	0.00266134	0.00632319
ENSMUSG00000028955	22319	Vamp3	vesicle-associated membrane protein 3 [Source:MGI Symbol;Acc:MGI:1321389]	0.654329	11.7918	0.000594924	0.0036064	0.535895	7.89739	0.00495062	0.0109459
ENSMUSG00000028962	20535	Slc4a2	solute carrier family 4 (anion exchanger), member 2 [Source:MGI Symbol;Acc:MGI:109351]	0.435279	5.64741	0.0174812	0.0592344	1.1742	37.9492	7.26121e-10	7.39186e-09
ENSMUSG00000028971	12854	Cort	cortistatin [Source:MGI Symbol;Acc:MGI:109538]	0.885438	11.381	0.000741992	0.00434894	1.3591	25.3313	4.82809e-07	2.86311e-06
ENSMUSG00000028995	84652	Fam126a	family with sequence similarity 126, member A [Source:MGI Symbol;Acc:MGI:2149839]	0.353058	4.52008	0.0334992	0.0978276	0.626459	13.994	0.000183392	0.000583834
ENSMUSG00000029101	71729	Rgs12	regulator of G-protein signaling 12 [Source:MGI Symbol;Acc:MGI:1918979]	0.935515	34.4084	4.46782e-09	1.03651e-07	0.437363	7.47857	0.00624377	0.0134393
ENSMUSG00000029406	19679	Pitpnm2	phosphatidylinositol transfer protein, membrane-associated 2 [Source:MGI Symbol;Acc:MGI:1336192]	1.09245	40.3338	2.14072e-10	6.4861e-09	0.46862	7.46814	0.00628002	0.0135138
ENSMUSG00000029455	11669	Aldh2	aldehyde dehydrogenase 2, mitochondrial [Source:MGI Symbol;Acc:MGI:99600]	0.882888	7.91068	0.00491438	0.0211271	1.08518	11.7928	0.000594596	0.00166507
ENSMUSG00000029484	11745	Anxa3	annexin A3 [Source:MGI Symbol;Acc:MGI:1201378]	0.932548	10.8889	0.000967403	0.00542725	0.975832	11.7309	0.000614724	0.00171508
ENSMUSG00000029545	11409	Acads	acyl-Coenzyme A dehydrogenase, short chain [Source:MGI Symbol;Acc:MGI:87868]	1.3815	13.4397	0.000246355	0.0017046	1.25471	9.46034	0.00209963	0.00511724
ENSMUSG00000029577	117146	Ube3b	ubiquitin protein ligase E3B [Source:MGI Symbol;Acc:MGI:1891295]	1.12782	63.7131	1.43927e-15	1.42505e-13	0.470608	11.2121	0.000812644	0.00220119
ENSMUSG00000029622	11867	Arpc1b	actin related protein 2/3 complex, subunit 1B [Source:MGI Symbol;Acc:MGI:1343142]	1.4704	37.2476	1.04041e-09	2.76015e-08	0.570094	5.69318	0.017031	0.0325886
ENSMUSG00000029648	14254	Flt1	FMS-like tyrosine kinase 1 [Source:MGI Symbol;Acc:MGI:95558]	1.81997	11.4177	0.000727459	0.00427528	1.51594	7.89562	0.00495546	0.010954
ENSMUSG00000029695	30956	Aass	aminoadipate-semialdehyde synthase [Source:MGI Symbol;Acc:MGI:1353573]	0.799568	5.45785	0.0194805	0.0643564	1.68298	22.5582	2.0387e-06	1.04472e-05
ENSMUSG00000029705	13047	Cux1	cut-like homeobox 1 [Source:MGI Symbol;Acc:MGI:88568]	0.574184	19.816	8.52646e-06	9.12292e-05	0.262668	4.14932	0.0416512	0.0713739
ENSMUSG00000029710	13846	Ephb4	Eph receptor B4 [Source:MGI Symbol;Acc:MGI:104757]	0.805412	3.92295	0.0476313	0.127216	1.0477	6.06374	0.0137985	0.027089
ENSMUSG00000029994	11746	Anxa4	annexin A4 [Source:MGI Symbol;Acc:MGI:88030]	0.521753	5.99615	0.0143372	0.0504515	0.728106	11.2299	0.000804917	0.00218239
ENSMUSG00000030035	22377	Wbp1	WW domain binding protein 1 [Source:MGI Symbol;Acc:MGI:104710]	0.7023	9.10355	0.00255113	0.0122363	0.769697	10.762	0.00103604	0.00273463
ENSMUSG00000030088	107747	Aldh1l1	aldehyde dehydrogenase 1 family, member L1 [Source:MGI Symbol;Acc:MGI:1340024]	0.785148	6.20612	0.012731	0.0459763	1.12196	12.4833	0.000410597	0.00119487
ENSMUSG00000030237	28250	Slco1a4	solute carrier organic anion transporter family, member 1a4 [Source:MGI Symbol;Acc:MGI:1351896]	1.08531	4.43641	0.0351802	0.101401	1.27908	6.05751	0.0138473	0.0271559
ENSMUSG00000030259	71323	Rassf8	Ras association (RalGDS/AF-6) domain family (N-terminal) member 8 [Source:MGI Symbol;Acc:MGI:1918573]	0.832705	17.4594	2.9351e-05	0.000271537	0.527955	6.88003	0.00871641	0.0180447
ENSMUSG00000030401	20167	Rtn2	reticulon 2 (Z-band associated protein) [Source:MGI Symbol;Acc:MGI:107612]	1.38563	67.4218	2.19213e-16	2.41483e-14	0.823564	23.7688	1.08627e-06	5.9379e-06
ENSMUSG00000030413	21946	Pglyrp1	peptidoglycan recognition protein 1 [Source:MGI Symbol;Acc:MGI:1345092]	1.28967	7.19657	0.0073043	0.0292137	1.35184	7.54258	0.00602575	0.0130172
ENSMUSG00000030447	20430	Cyfip1	cytoplasmic FMR1 interacting protein 1 [Source:MGI Symbol;Acc:MGI:1338801]	0.48252	5.05924	0.024495	0.0767913	0.476598	4.92874	0.0264136	0.0478401
ENSMUSG00000030538	23991	Cib1	calcium and integrin binding 1 (calmyrin) [Source:MGI Symbol;Acc:MGI:1344418]	0.567526	4.41651	0.0355928	0.102395	1.12949	16.7361	4.29557e-05	0.000161329
ENSMUSG00000030541	269951	Idh2	isocitrate dehydrogenase 2 (NADP+), mitochondrial [Source:MGI Symbol;Acc:MGI:96414]	1.28625	15.7056	7.40067e-05	0.00060463	0.85358	6.9857	0.00821636	0.0171482
ENSMUSG00000030678	17188	Maz	MYC-associated zinc finger protein (purine-binding transcription factor) [Source:MGI Symbol;Acc:MGI:1338823]	1.72285	113.883	1.38263e-26	9.19943e-24	0.653972	16.6583	4.47538e-05	0.000167101
ENSMUSG00000030701	27276	Plekhb1	pleckstrin homology domain containing, family B (evectins) member 1 [Source:MGI Symbol;Acc:MGI:1351469]	1.83612	29.4722	5.67249e-08	1.0245e-06	1.60804	22.8928	1.71288e-06	8.93449e-06
ENSMUSG00000030744	27050	Rps3	ribosomal protein S3 [Source:MGI Symbol;Acc:MGI:1350917]	0.532541	7.93358	0.00485258	0.0209385	0.556063	8.64155	0.00328582	0.00761868
ENSMUSG00000030921	20128	Trim30a	tripartite motif-containing 30A [Source:MGI Symbol;Acc:MGI:98178]	0.812629	8.52313	0.00350661	0.0159238	1.17879	16.375	5.19667e-05	0.000190794
ENSMUSG00000031015	20947	Swap70	SWA-70 protein [Source:MGI Symbol;Acc:MGI:1298390]	0.73096	6.44847	0.0111048	0.0411762	0.956669	10.5606	0.00115522	0.00300955
ENSMUSG00000031065	18555	Cdk16	cyclin-dependent kinase 16 [Source:MGI Symbol;Acc:MGI:97516]	1.29066	72.4635	1.70151e-17	2.39856e-15	0.430332	8.2478	0.00408015	0.00924112
ENSMUSG00000031207	17698	Msn	moesin [Source:MGI Symbol;Acc:MGI:97167]	0.581261	5.65996	0.0173565	0.0588839	1.18836	22.9523	1.66071e-06	8.69232e-06
ENSMUSG00000031320	20102	Rps4x	ribosomal protein S4, X-linked [Source:MGI Symbol;Acc:MGI:98158]	0.453701	7.5735	0.00592326	0.0246263	0.595317	12.8867	0.000330921	0.000985416
ENSMUSG00000031387	19703	Renbp	renin binding protein [Source:MGI Symbol;Acc:MGI:105940]	1.07551	9.49227	0.00206339	0.0102547	1.1504	10.1923	0.00141025	0.00359401
ENSMUSG00000031392	16179	Irak1	interleukin-1 receptor-associated kinase 1 [Source:MGI Symbol;Acc:MGI:107420]	0.671431	10.9725	0.000924755	0.0052179	0.439885	4.7038	0.0300959	0.0537661
ENSMUSG00000031442	17207	Mcf2l	mcf.2 transforming sequence-like [Source:MGI Symbol;Acc:MGI:103263]	1.21143	56.6582	5.18551e-14	3.67046e-12	0.366345	5.22237	0.0222981	0.0412623
ENSMUSG00000031486	78560	Adgra2	adhesion G protein-coupled receptor A2 [Source:MGI Symbol;Acc:MGI:1925810]	0.580946	4.56989	0.0325387	0.0954582	0.957646	11.3295	0.000762866	0.00207939
ENSMUSG00000031667	14339	Aktip	thymoma viral proto-oncogene 1 interacting protein [Source:MGI Symbol;Acc:MGI:3693832]	0.359162	6.10357	0.0134909	0.0480677	0.475011	10.634	0.00111026	0.00291066
ENSMUSG00000031749	20444	St3gal2	ST3 beta-galactoside alpha-2,3-sialyltransferase 2 [Source:MGI Symbol;Acc:MGI:99427]	0.621088	18.7009	1.52908e-05	0.000151758	0.790682	29.9514	4.43019e-08	3.24062e-07
ENSMUSG00000031938	70984	4931406C07Rik	RIKEN cDNA 4931406C07 gene [Source:MGI Symbol;Acc:MGI:1918234]	0.720169	5.4328	0.0197619	0.0649901	0.78442	6.36632	0.0116306	0.0232781
ENSMUSG00000031967	114896	Afg3l1	AFG3-like AAA ATPase 1 [Source:MGI Symbol;Acc:MGI:1928277]	0.471539	6.25976	0.0123511	0.0448675	0.452216	5.71341	0.0168358	0.0322523
ENSMUSG00000031983	69551	2310022B05Rik	RIKEN cDNA 2310022B05 gene [Source:MGI Symbol;Acc:MGI:1916801]	0.804609	6.17463	0.0129595	0.0465491	0.884522	7.40551	0.00650243	0.0139419
ENSMUSG00000032050	19684	Rdx	radixin [Source:MGI Symbol;Acc:MGI:97887]	1.35284	53.5576	2.51127e-13	1.4813e-11	0.689071	14.1564	0.000168225	0.000540412
ENSMUSG00000032125	74144	Robo4	roundabout guidance receptor 4 [Source:MGI Symbol;Acc:MGI:1921394]	2.38833	11.0946	0.000865789	0.00494558	1.77503	5.45111	0.0195559	0.0368103
ENSMUSG00000032194	235041	Kank2	KN motif and ankyrin repeat domains 2 [Source:MGI Symbol;Acc:MGI:2384568]	1.91076	47.2215	6.3401e-12	2.73215e-10	1.38521	22.58	2.01576e-06	1.03456e-05
ENSMUSG00000032232	68178	Cgnl1	cingulin-like 1 [Source:MGI Symbol;Acc:MGI:1915428]	2.75559	56.8169	4.78349e-14	3.44453e-12	0.860386	5.61096	0.0178485	0.0339421
ENSMUSG00000032269	15561	Htr3a	5-hydroxytryptamine (serotonin) receptor 3A [Source:MGI Symbol;Acc:MGI:96282]	0.509396	4.39604	0.0360225	0.103296	1.22607	23.9047	1.01224e-06	5.58646e-06
ENSMUSG00000032313	244886	Tmem266	transmembrane protein 266 [Source:MGI Symbol;Acc:MGI:2142980]	0.749968	4.99164	0.02547	0.0791903	1.36641	13.6777	0.000217021	0.000679834
ENSMUSG00000032399	67891	Rpl4	ribosomal protein L4 [Source:MGI Symbol;Acc:MGI:1915141]	0.507973	5.89901	0.0151494	0.0526965	0.418827	4.01586	0.0450743	0.0763976
ENSMUSG00000032517	17433	Mobp	myelin-associated oligodendrocytic basic protein [Source:MGI Symbol;Acc:MGI:108511]	2.75461	58.0723	2.52656e-14	1.93672e-12	1.22038	12.6213	0.00038137	0.00112
ENSMUSG00000032518	16785	Rpsa	ribosomal protein SA [Source:MGI Symbol;Acc:MGI:105381]	1.1739	41.8919	9.64616e-11	3.16478e-09	0.538617	8.11719	0.00438475	0.00983626
ENSMUSG00000032589	12217	Bsn	bassoon [Source:MGI Symbol;Acc:MGI:1277955]	0.592983	7.48446	0.00622339	0.0256237	0.687044	10.0181	0.00155012	0.0039115
ENSMUSG00000032648	19309	Pygm	muscle glycogen phosphorylase [Source:MGI Symbol;Acc:MGI:97830]	0.824419	11.2083	0.000814318	0.00469444	1.12182	20.3543	6.43498e-06	2.92857e-05
ENSMUSG00000032812	69710	Arap1	ArfGAP with RhoGAP domain, ankyrin repeat and PH domain 1 [Source:MGI Symbol;Acc:MGI:1916960]	1.11351	13.6733	0.000217531	0.00153322	0.661878	4.71093	0.0299714	0.053584
ENSMUSG00000032826	109676	Ank2	ankyrin 2, brain [Source:MGI Symbol;Acc:MGI:88025]	1.5943	9.70284	0.00183984	0.00929925	1.25762	6.14414	0.0131848	0.0260161
ENSMUSG00000033059	110078	Pygb	brain glycogen phosphorylase [Source:MGI Symbol;Acc:MGI:97828]	0.626996	7.56211	0.00596083	0.0247572	0.701129	9.42166	0.00214437	0.00520797
ENSMUSG00000033174	23945	Mgll	monoglyceride lipase [Source:MGI Symbol;Acc:MGI:1346042]	1.36604	38.6601	5.04421e-10	1.42939e-08	0.740319	11.6161	0.000653829	0.00180691
ENSMUSG00000033209	209683	Ttc28	tetratricopeptide repeat domain 28 [Source:MGI Symbol;Acc:MGI:2140873]	1.12956	23.7002	1.1257e-06	1.4814e-05	0.599066	6.59172	0.0102454	0.0208417
ENSMUSG00000033400	77559	Agl	amylo-1,6-glucosidase, 4-alpha-glucanotransferase [Source:MGI Symbol;Acc:MGI:1924809]	0.508862	3.87037	0.0491457	0.13036	1.22699	21.8358	2.97011e-06	1.46558e-05
ENSMUSG00000033467	57914	Crlf2	cytokine receptor-like factor 2 [Source:MGI Symbol;Acc:MGI:1889506]	0.966992	16.4972	4.87216e-05	0.000419914	0.674624	7.11779	0.00763228	0.0160723
ENSMUSG00000033488	226527	BC026585	cDNA sequence BC026585 [Source:MGI Symbol;Acc:MGI:2448516]	0.922091	4.89585	0.0269214	0.0826218	1.35058	10.0808	0.00149824	0.00378923
ENSMUSG00000033577	17920	Myo6	myosin VI [Source:MGI Symbol;Acc:MGI:104785]	2.1518	11.2844	0.000781591	0.00453092	1.77174	7.84225	0.00510389	0.0112478
ENSMUSG00000033707	223665	Lrrc24	leucine rich repeat containing 24 [Source:MGI Symbol;Acc:MGI:3605040]	1.04598	15.7874	7.08743e-05	0.000582472	1.20776	19.2698	1.13489e-05	4.85665e-05
ENSMUSG00000033763	244654	Mtss1l	metastasis suppressor 1-like [Source:MGI Symbol;Acc:MGI:3039591]	0.908786	7.21306	0.00723749	0.0290092	1.93674	30.9402	2.66103e-08	2.03417e-07
ENSMUSG00000033819	73062	Ppp1r16a	protein phosphatase 1, regulatory (inhibitor) subunit 16A [Source:MGI Symbol;Acc:MGI:1920312]	1.70406	72.2178	1.92706e-17	2.64916e-15	0.467815	5.37268	0.0204545	0.0382234
ENSMUSG00000034055	18679	Phka1	phosphorylase kinase alpha 1 [Source:MGI Symbol;Acc:MGI:97576]	0.784045	10.3486	0.00129571	0.0069302	1.24401	25.2681	4.98894e-07	2.94904e-06
ENSMUSG00000034116	22324	Vav1	vav 1 oncogene [Source:MGI Symbol;Acc:MGI:98923]	0.767406	3.92729	0.0475085	0.12699	1.22937	9.52089	0.00203147	0.00496494
ENSMUSG00000034164	140703	Emid1	EMI domain containing 1 [Source:MGI Symbol;Acc:MGI:2155091]	0.49354	4.75458	0.0292205	0.0879576	1.28091	28.6691	8.5862e-08	5.91644e-07
ENSMUSG00000034201	78926	Gas2l1	growth arrest-specific 2 like 1 [Source:MGI Symbol;Acc:MGI:1926176]	1.70424	68.7817	1.09988e-16	1.32575e-14	0.564418	7.56377	0.00595532	0.0128969
ENSMUSG00000034311	16571	Kif4	kinesin family member 4 [Source:MGI Symbol;Acc:MGI:108389]	0.979801	7.93601	0.00484606	0.0209212	1.39575	14.225	0.000162203	0.000522479
ENSMUSG00000034413	240055	Neurl1b	neuralized E3 ubiquitin protein ligase 1B [Source:MGI Symbol;Acc:MGI:3643092]	1.53554	28.6883	8.50173e-08	1.45942e-06	0.780531	7.62937	0.00574254	0.0124979
ENSMUSG00000034422	547253	Parp14	poly (ADP-ribose) polymerase family, member 14 [Source:MGI Symbol;Acc:MGI:1919489]	1.03729	8.54578	0.00346325	0.0157656	0.919768	6.14135	0.0132057	0.0260542
ENSMUSG00000034485	72565	Uaca	uveal autoantigen with coiled-coil domains and ankyrin repeats [Source:MGI Symbol;Acc:MGI:1919815]	1.59529	23.809	1.06382e-06	1.40924e-05	0.804394	5.61174	0.0178405	0.0339308
ENSMUSG00000034573	19249	Ptpn13	protein tyrosine phosphatase, non-receptor type 13 [Source:MGI Symbol;Acc:MGI:103293]	0.844362	9.21365	0.00240217	0.0116461	0.664609	5.60726	0.0178862	0.0340021
ENSMUSG00000034574	208846	Daam1	dishevelled associated activator of morphogenesis 1 [Source:MGI Symbol;Acc:MGI:1914596]	1.07157	55.1303	1.12796e-13	7.30058e-12	0.345733	5.71832	0.0167887	0.032177
ENSMUSG00000034595	76448	Ppp1r18	protein phosphatase 1, regulatory subunit 18 [Source:MGI Symbol;Acc:MGI:1923698]	1.17001	18.5583	1.64783e-05	0.000161711	0.914986	10.499	0.00119438	0.00310331
ENSMUSG00000034853	329910	Acot11	acyl-CoA thioesterase 11 [Source:MGI Symbol;Acc:MGI:1913736]	0.913857	7.57732	0.00591072	0.0245859	1.39601	17.1928	3.37706e-05	0.000129284
ENSMUSG00000034994	13629	Eef2	eukaryotic translation elongation factor 2 [Source:MGI Symbol;Acc:MGI:95288]	1.11382	28.7799	8.10898e-08	1.39933e-06	0.431784	4.4113	0.0357016	0.0623279
ENSMUSG00000035109	271849	Shc4	SHC (Src homology 2 domain containing) family, member 4 [Source:MGI Symbol;Acc:MGI:2655364]	1.345	15.6556	7.59877e-05	0.000618154	1.05936	9.18713	0.00243723	0.00584331
ENSMUSG00000035202	102436	Lars2	leucyl-tRNA synthetase, mitochondrial [Source:MGI Symbol;Acc:MGI:2142973]	1.11727	19.129	1.22176e-05	0.000125091	0.659807	6.77594	0.00923948	0.0189857
ENSMUSG00000035203	13854	Epn1	epsin 1 [Source:MGI Symbol;Acc:MGI:1333763]	1.5827	70.8778	3.80047e-17	5.01722e-15	0.378124	4.17433	0.0410409	0.0704223
ENSMUSG00000035226	241770	Rims4	regulating synaptic membrane exocytosis 4 [Source:MGI Symbol;Acc:MGI:2674366]	1.75056	108.188	2.44415e-25	1.3552e-22	0.387621	5.53334	0.0186575	0.035315
ENSMUSG00000035615	666060	Frmpd1	FERM and PDZ domain containing 1 [Source:MGI Symbol;Acc:MGI:2446274]	1.2363	21.3162	3.89435e-06	4.5395e-05	0.760779	7.76481	0.00532739	0.0116975
ENSMUSG00000035697	70719	Arhgap45	Rho GTPase activating protein 45 [Source:MGI Symbol;Acc:MGI:1917969]	2.12162	36.7162	1.36642e-09	3.51298e-08	0.978503	6.39354	0.0114536	0.0229652
ENSMUSG00000035773	114229	Kiss1r	KISS1 receptor [Source:MGI Symbol;Acc:MGI:2148793]	0.764533	3.84578	0.0498712	0.131697	1.45088	10.6147	0.00112193	0.00293754
ENSMUSG00000035863	18483	Palm	paralemmin [Source:MGI Symbol;Acc:MGI:1261814]	2.19038	129.655	4.87446e-30	9.00909e-27	0.937744	24.8847	6.08638e-07	3.52142e-06
ENSMUSG00000035936	214579	Aldh5a1	aldhehyde dehydrogenase family 5, subfamily A1 [Source:MGI Symbol;Acc:MGI:2441982]	0.593267	5.26509	0.0217572	0.0699749	0.945395	13.1964	0.000280492	0.000851716
ENSMUSG00000036053	71409	Fmnl2	formin-like 2 [Source:MGI Symbol;Acc:MGI:1918659]	1.39622	31.7346	1.76749e-08	3.58105e-07	0.853662	12.0673	0.000513126	0.00145953
ENSMUSG00000036620	103534	Mgat4b	mannoside acetylglucosaminyltransferase 4, isoenzyme B [Source:MGI Symbol;Acc:MGI:2143974]	0.702617	10.7538	0.00104065	0.00576812	0.812326	13.4088	0.000250442	0.000770884
ENSMUSG00000036622	74772	Atp13a2	ATPase type 13A2 [Source:MGI Symbol;Acc:MGI:1922022]	0.399212	5.56759	0.0182959	0.0612344	1.57229	81.8953	1.43491e-19	7.29919e-18
ENSMUSG00000036644	76795	Tbc1d9b	TBC1 domain family, member 9B [Source:MGI Symbol;Acc:MGI:1924045]	1.19196	36.9464	1.2142e-09	3.16072e-08	1.03795	28.0089	1.20757e-07	8.10932e-07
ENSMUSG00000036879	102093	Phkb	phosphorylase kinase beta [Source:MGI Symbol;Acc:MGI:97578]	0.484033	7.35768	0.00667771	0.0271449	0.407184	5.18074	0.0228386	0.0421359
ENSMUSG00000036882	233071	Arhgap33	Rho GTPase activating protein 33 [Source:MGI Symbol;Acc:MGI:2673998]	1.48067	100.775	1.03066e-23	4.51158e-21	0.401262	7.55912	0.0059707	0.0129234
ENSMUSG00000037126	73728	Psd	pleckstrin and Sec7 domain containing [Source:MGI Symbol;Acc:MGI:1920978]	1.87022	100.848	9.93198e-24	4.4651e-21	0.665394	13.3822	0.000254023	0.00078075
ENSMUSG00000037235	17122	Mxd4	Max dimerization protein 4 [Source:MGI Symbol;Acc:MGI:104991]	1.22343	51.4186	7.46285e-13	3.92042e-11	0.479072	8.00873	0.00465525	0.0103745
ENSMUSG00000037242	29876	Clic4	chloride intracellular channel 4 (mitochondrial) [Source:MGI Symbol;Acc:MGI:1352754]	1.09063	26.2608	2.9828e-07	4.48607e-06	0.55516	6.87294	0.00875105	0.0181006
ENSMUSG00000037428	381677	Vgf	VGF nerve growth factor inducible [Source:MGI Symbol;Acc:MGI:1343180]	0.79252	17.5973	2.72982e-05	0.000254243	2.64172	171.414	3.63431e-39	6.04531e-35
ENSMUSG00000037579	16512	Kcnh3	potassium voltage-gated channel, subfamily H (eag-related), member 3 [Source:MGI Symbol;Acc:MGI:1341723]	0.942593	22.3107	2.31905e-06	2.84267e-05	1.221	35.6507	2.36059e-09	2.19363e-08
ENSMUSG00000037622	230796	Wdtc1	WD and tetratricopeptide repeats 1 [Source:MGI Symbol;Acc:MGI:2685541]	1.6923	107.946	2.76215e-25	1.48212e-22	0.616385	14.3672	0.000150396	0.00048928
ENSMUSG00000037712	218952	Fermt2	fermitin family member 2 [Source:MGI Symbol;Acc:MGI:2385001]	0.803627	11.2432	0.000799173	0.00461899	0.477314	3.98953	0.0457838	0.0774581
ENSMUSG00000037736	77569	Limch1	LIM and calponin homology domains 1 [Source:MGI Symbol;Acc:MGI:1924819]	1.73473	13.9544	0.000187295	0.00134611	0.919372	4.07519	0.0435174	0.0741061
ENSMUSG00000037742	13627	Eef1a1	eukaryotic translation elongation factor 1 alpha 1 [Source:MGI Symbol;Acc:MGI:1096881]	0.652919	12.2387	0.000468093	0.00295158	0.370991	3.97242	0.0462513	0.0781806
ENSMUSG00000037771	22348	Slc32a1	solute carrier family 32 (GABA vesicular transporter), member 1 [Source:MGI Symbol;Acc:MGI:1194488]	0.525577	7.72341	0.00545094	0.0229706	1.76861	80.2668	3.27113e-19	1.51565e-17
ENSMUSG00000037815	12385	Ctnna1	catenin (cadherin associated protein), alpha 1 [Source:MGI Symbol;Acc:MGI:88274]	0.4094	5.7449	0.0165366	0.0565755	0.379494	4.92407	0.0264851	0.0479591
ENSMUSG00000037820	21817	Tgm2	transglutaminase 2, C polypeptide [Source:MGI Symbol;Acc:MGI:98731]	1.34014	12.3613	0.000438316	0.00278387	0.912077	5.10489	0.0238585	0.0437652
ENSMUSG00000038143	71069	Stox2	storkhead box 2 [Source:MGI Symbol;Acc:MGI:1918319]	1.47372	86.5855	1.33825e-20	3.22616e-18	0.522231	11.1913	0.000821795	0.00222453
ENSMUSG00000038351	97761	Sgsm2	small G protein signaling modulator 2 [Source:MGI Symbol;Acc:MGI:2144695]	1.76892	131.537	1.88906e-30	4.48894e-27	0.466697	9.43328	0.00213083	0.00517995
ENSMUSG00000038366	16796	Lasp1	LIM and SH3 protein 1 [Source:MGI Symbol;Acc:MGI:109656]	1.45748	78.7742	6.96289e-19	1.2869e-16	0.412178	6.46768	0.0109854	0.0221305
ENSMUSG00000038375	68728	Trp53inp2	transformation related protein 53 inducible nuclear protein 2 [Source:MGI Symbol;Acc:MGI:1915978]	1.66234	79.3904	5.09742e-19	9.52701e-17	0.835737	20.7705	5.17749e-06	2.41442e-05
ENSMUSG00000038437	246198	Mllt6	myeloid/lymphoid or mixed-lineage leukemia; translocated to, 6 [Source:MGI Symbol;Acc:MGI:1935145]	2.20016	109.455	1.28978e-25	7.66222e-23	1.24511	36.2236	1.75925e-09	1.66742e-08
ENSMUSG00000038517	73174	Tbkbp1	TBK1 binding protein 1 [Source:MGI Symbol;Acc:MGI:1920424]	2.03653	85.1132	2.8177e-20	6.33373e-18	0.50601	4.9344	0.0263273	0.0477098
ENSMUSG00000038539	107503	Atf5	activating transcription factor 5 [Source:MGI Symbol;Acc:MGI:2141857]	1.0072	10.4972	0.00119554	0.00649042	0.782064	6.15946	0.0130711	0.0258256
ENSMUSG00000038668	14745	Lpar1	lysophosphatidic acid receptor 1 [Source:MGI Symbol;Acc:MGI:108429]	1.29062	13.3905	0.000252899	0.00174263	1.72603	23.3425	1.35572e-06	7.24646e-06
ENSMUSG00000038738	243961	Shank1	SH3/ankyrin domain gene 1 [Source:MGI Symbol;Acc:MGI:3613677]	1.21603	15.2425	9.45502e-05	0.000746439	1.20776	15.0334	0.000105627	0.000359083
ENSMUSG00000038777	20360	Sema6c	sema domain, transmembrane domain (TM), and cytoplasmic domain, (semaphorin) 6C [Source:MGI Symbol;Acc:MGI:1338032]	1.17235	15.3233	9.05913e-05	0.000719625	1.66653	20.8619	4.93617e-06	2.31226e-05
ENSMUSG00000038855	320404	Itpkb	inositol 1,4,5-trisphosphate 3-kinase B [Source:MGI Symbol;Acc:MGI:109235]	1.91176	25.8041	3.77885e-07	5.53809e-06	1.19116	10.0227	0.00154619	0.0039022
ENSMUSG00000038872	11906	Zfhx3	zinc finger homeobox 3 [Source:MGI Symbol;Acc:MGI:99948]	0.371966	5.19574	0.0226423	0.0721932	0.431871	6.93995	0.00842916	0.0175395
ENSMUSG00000038976	217124	Ppp1r9b	protein phosphatase 1, regulatory subunit 9B [Source:MGI Symbol;Acc:MGI:2387581]	1.96849	47.7616	4.81325e-12	2.11808e-10	1.13739	16.634	4.53319e-05	0.00016907
ENSMUSG00000039194	19771	Rlbp1	retinaldehyde binding protein 1 [Source:MGI Symbol;Acc:MGI:97930]	1.03362	8.78032	0.00304498	0.0141521	0.855517	6.01789	0.0141616	0.0276971
ENSMUSG00000039298	214444	Cdk5rap2	CDK5 regulatory subunit associated protein 2 [Source:MGI Symbol;Acc:MGI:2384875]	0.984217	13.2502	0.000272544	0.00185495	0.715615	6.80503	0.00909014	0.0187135
ENSMUSG00000039844	107746	Rapgef1	Rap guanine nucleotide exchange factor (GEF) 1 [Source:MGI Symbol;Acc:MGI:104580]	1.71334	120.202	5.71428e-28	5.59125e-25	0.405368	6.97064	0.00828579	0.0172779
ENSMUSG00000039959	215114	Hip1	huntingtin interacting protein 1 [Source:MGI Symbol;Acc:MGI:1099804]	1.10933	34.6125	4.02311e-09	9.41216e-08	0.471291	6.30667	0.0120285	0.0239849
ENSMUSG00000039976	207592	Tbc1d16	TBC1 domain family, member 16 [Source:MGI Symbol;Acc:MGI:2652878]	1.79304	116.229	4.23539e-27	3.35483e-24	0.669651	16.3498	5.26617e-05	0.000193031
ENSMUSG00000040146	71746	Rgl3	ral guanine nucleotide dissociation stimulator-like 3 [Source:MGI Symbol;Acc:MGI:1918996]	1.62682	11.3693	0.000746664	0.00437017	1.82024	10.6761	0.00108527	0.00284964
ENSMUSG00000040260	76441	Daam2	dishevelled associated activator of morphogenesis 2 [Source:MGI Symbol;Acc:MGI:1923691]	1.19957	11.3488	0.000754952	0.00441247	1.66975	21.3409	3.84441e-06	1.85303e-05
ENSMUSG00000040345	216445	Arhgap9	Rho GTPase activating protein 9 [Source:MGI Symbol;Acc:MGI:2143764]	1.20419	5.47139	0.0193302	0.0640005	1.32364	5.25471	0.0218875	0.0406098
ENSMUSG00000040390	269881	Map3k10	mitogen-activated protein kinase kinase kinase 10 [Source:MGI Symbol;Acc:MGI:1346879]	1.49823	91.8603	9.30179e-22	2.71449e-19	0.461006	8.73351	0.00312415	0.00728341
ENSMUSG00000040462	216440	Os9	amplified in osteosarcoma [Source:MGI Symbol;Acc:MGI:1924301]	0.564377	12.309	0.00045078	0.00285369	1.98145	140.298	2.29088e-32	3.81065e-29
ENSMUSG00000040466	233016	Blvrb	biliverdin reductase B (flavin reductase (NADPH)) [Source:MGI Symbol;Acc:MGI:2385271]	0.789209	8.64088	0.00328703	0.0150915	0.643392	5.5985	0.0179759	0.0341532
ENSMUSG00000040502	216438	2018-03-09	membrane-associated ring finger (C3HC4) 9 [Source:MGI Symbol;Acc:MGI:2446144]	0.511136	7.22438	0.00719202	0.0288618	0.735238	14.4684	0.000142534	0.000466992
ENSMUSG00000040740	384071	Slc25a34	solute carrier family 25, member 34 [Source:MGI Symbol;Acc:MGI:2686215]	1.07141	4.60299	0.0319162	0.0940856	1.66907	9.8052	0.00174019	0.00433069
ENSMUSG00000040794	67445	C1qtnf4	C1q and tumor necrosis factor related protein 4 [Source:MGI Symbol;Acc:MGI:1914695]	0.572048	9.09243	0.00256669	0.0123039	1.50607	56.6489	5.20996e-14	1.01956e-12
ENSMUSG00000040797	243621	Iqsec3	IQ motif and Sec7 domain 3 [Source:MGI Symbol;Acc:MGI:2677208]	1.70103	113.065	2.08841e-26	1.3361e-23	0.739811	22.1285	2.54998e-06	1.27953e-05
ENSMUSG00000040867	380785	Begain	brain-enriched guanylate kinase-associated [Source:MGI Symbol;Acc:MGI:3044626]	1.75143	75.7991	3.14042e-18	5.12135e-16	0.393285	3.92059	0.0476982	0.0801751
ENSMUSG00000040952	20085	Rps19	ribosomal protein S19 [Source:MGI Symbol;Acc:MGI:1333780]	0.640659	13.9523	0.000187504	0.00134611	0.711266	17.0383	3.66342e-05	0.000139222
ENSMUSG00000041219	228482	Arhgap11a	Rho GTPase activating protein 11A [Source:MGI Symbol;Acc:MGI:2444300]	1.2005	19.8978	8.16936e-06	8.79542e-05	0.563425	4.03674	0.0445198	0.0756041
ENSMUSG00000041235	320790	Chd7	chromodomain helicase DNA binding protein 7 [Source:MGI Symbol;Acc:MGI:2444748]	0.984125	23.0617	1.56883e-06	2.00583e-05	0.462743	5.01375	0.0251468	0.045795
ENSMUSG00000041378	12741	Cldn5	claudin 5 [Source:MGI Symbol;Acc:MGI:1276112]	2.43205	11.6034	0.000658308	0.00392203	1.8762	6.70027	0.00963981	0.0197352
ENSMUSG00000041607	17196	Mbp	myelin basic protein [Source:MGI Symbol;Acc:MGI:96925]	3.01949	45.3689	1.63205e-11	6.28944e-10	2.15903	24.8409	6.22613e-07	3.59104e-06
ENSMUSG00000041609	75665	Bicdl1	BICD family like cargo adaptor 1 [Source:MGI Symbol;Acc:MGI:1922915]	1.51997	54.8423	1.30597e-13	8.32321e-12	0.430147	4.25241	0.0391946	0.0675891
ENSMUSG00000041617	72315	Ccdc74a	coiled-coil domain containing 74A [Source:MGI Symbol;Acc:MGI:1919565]	0.96754	16.3572	5.24566e-05	0.000447698	0.672323	7.54689	0.00601137	0.0129946
ENSMUSG00000041670	NA	Rims1	regulating synaptic membrane exocytosis 1 [Source:MGI Symbol;Acc:MGI:2152971]	0.899548	19.7641	8.76115e-06	9.32393e-05	0.621402	9.50107	0.00205352	0.00501296
ENSMUSG00000041688	27494	Amot	angiomotin [Source:MGI Symbol;Acc:MGI:108440]	1.91872	23.1222	1.52027e-06	1.95275e-05	2.42281	35.1493	3.05376e-09	2.77727e-08
ENSMUSG00000041939	17855	Mvk	mevalonate kinase [Source:MGI Symbol;Acc:MGI:107624]	0.38769	3.95578	0.0467106	0.125482	0.489097	6.20103	0.0127676	0.0252679
ENSMUSG00000042066	68875	Tmcc2	transmembrane and coiled-coil domains 2 [Source:MGI Symbol;Acc:MGI:1916125]	2.02924	97.0023	6.92452e-23	2.55961e-20	1.13809	31.4684	2.02708e-08	1.59125e-07
ENSMUSG00000042116	246228	Vwa1	von Willebrand factor A domain containing 1 [Source:MGI Symbol;Acc:MGI:2179729]	0.777357	6.94315	0.00841407	0.0329239	1.39873	20.8915	4.86047e-06	2.28204e-05
ENSMUSG00000042156	66573	Dzip1	DAZ interacting protein 1 [Source:MGI Symbol;Acc:MGI:1914311]	1.07276	20.537	5.84909e-06	6.57116e-05	0.542811	5.31366	0.0211588	0.0394216
ENSMUSG00000042331	432572	Specc1	sperm antigen with calponin homology and coiled-coil domains 1 [Source:MGI Symbol;Acc:MGI:2442356]	1.35003	53.8773	2.13409e-13	1.29085e-11	0.465236	6.52753	0.0106217	0.0214988
ENSMUSG00000042388	242667	Dlgap3	discs, large (Drosophila) homolog-associated protein 3 [Source:MGI Symbol;Acc:MGI:3039563]	2.44652	140.961	1.64086e-32	5.4588e-29	1.00205	24.2997	8.24503e-07	4.64436e-06
ENSMUSG00000042804	100129	Gpr153	G protein-coupled receptor 153 [Source:MGI Symbol;Acc:MGI:1916157]	0.817214	21.0831	4.39782e-06	5.05552e-05	1.2972	50.2019	1.38712e-12	2.12462e-11
ENSMUSG00000042903	54601	Foxo4	forkhead box O4 [Source:MGI Symbol;Acc:MGI:1891915]	0.964832	9.41262	0.00215497	0.0106273	1.16114	12.7808	0.00035019	0.00103704
ENSMUSG00000042978	104175	Sbk1	SH3-binding kinase 1 [Source:MGI Symbol;Acc:MGI:2135937]	1.51122	74.1094	7.39051e-18	1.11758e-15	0.875592	25.3026	4.90043e-07	2.90188e-06
ENSMUSG00000043279	384309	Trim56	tripartite motif-containing 56 [Source:MGI Symbol;Acc:MGI:2685298]	1.66579	21.1028	4.35286e-06	5.00876e-05	1.99385	27.8103	1.33813e-07	8.92478e-07
ENSMUSG00000043460	207393	Elfn2	leucine rich repeat and fibronectin type III, extracellular 2 [Source:MGI Symbol;Acc:MGI:3608416]	0.763576	11.6331	0.000647893	0.00387664	1.39693	37.4042	9.60136e-10	9.57488e-09
ENSMUSG00000043716	19989	Rpl7	ribosomal protein L7 [Source:MGI Symbol;Acc:MGI:98073]	0.477701	10.0318	0.00153863	0.00800048	0.31467	4.35614	0.0368757	0.0640952
ENSMUSG00000043822	66548	Adamtsl5	ADAMTS-like 5 [Source:MGI Symbol;Acc:MGI:1913798]	0.699084	5.89506	0.0151834	0.0527597	0.712898	5.61206	0.0178373	0.0339287
ENSMUSG00000043857	268510	Mgat5b	mannoside acetylglucosaminyltransferase 5, isoenzyme B [Source:MGI Symbol;Acc:MGI:3606200]	0.510565	10.6745	0.00108621	0.00599071	1.39399	75.3667	3.90932e-18	1.54094e-16
ENSMUSG00000044033	545428	Ccdc141	coiled-coil domain containing 141 [Source:MGI Symbol;Acc:MGI:1919735]	0.792019	8.09764	0.0044323	0.0194684	0.833716	8.81435	0.0029887	0.00700297
ENSMUSG00000044037	235633	Als2cl	ALS2 C-terminal like [Source:MGI Symbol;Acc:MGI:2447532]	1.48121	16.6587	4.47446e-05	0.00038988	1.07034	8.13826	0.00433408	0.00974087
ENSMUSG00000044258	13024	Ctla2a	cytotoxic T lymphocyte-associated protein 2 alpha [Source:MGI Symbol;Acc:MGI:88554]	1.11857	6.28879	0.0121504	0.0442156	1.67083	12.7451	0.000356949	0.0010548
ENSMUSG00000044320	73598	1700001O22Rik	RIKEN cDNA 1700001O22 gene [Source:MGI Symbol;Acc:MGI:1923631]	0.878759	7.72983	0.00543158	0.0229137	0.800261	5.68717	0.0170893	0.0326874
ENSMUSG00000044361	271278	BC024139	cDNA sequence BC024139 [Source:MGI Symbol;Acc:MGI:2442591]	1.36833	11.2248	0.000807103	0.00465996	1.13385	6.30915	0.0120116	0.0239542
ENSMUSG00000044408	104725	Sptssa	serine palmitoyltransferase, small subunit A [Source:MGI Symbol;Acc:MGI:1913399]	0.57669	12.9878	0.000313519	0.00208938	0.510127	10.1119	0.00147318	0.0037355
ENSMUSG00000044533	16898	Rps2	ribosomal protein S2 [Source:MGI Symbol;Acc:MGI:105110]	1.12947	29.0408	7.087e-08	1.24878e-06	0.5956	8.11877	0.00438094	0.00983522
ENSMUSG00000044857	224640	Lemd2	LEM domain containing 2 [Source:MGI Symbol;Acc:MGI:2385045]	0.364066	4.35207	0.036964	0.105356	0.98791	30.4171	3.48449e-08	2.59682e-07
ENSMUSG00000045128	76808	Rpl18a	ribosomal protein L18A [Source:MGI Symbol;Acc:MGI:1924058]	0.396884	3.96978	0.0463239	0.124927	0.834465	17.3162	3.16473e-05	0.000122168
ENSMUSG00000045136	73710	Tubb2b	tubulin, beta 2B class IIB [Source:MGI Symbol;Acc:MGI:1920960]	0.716067	6.13643	0.0132424	0.0473708	1.09736	14.1204	0.000171478	0.00055012
ENSMUSG00000045246	66733	Kcng4	potassium voltage-gated channel, subfamily G, member 4 [Source:MGI Symbol;Acc:MGI:1913983]	0.38344	4.24059	0.0394685	0.110955	1.50703	58.7267	1.81169e-14	3.78113e-13
ENSMUSG00000045318	11553	Adra2c	adrenergic receptor, alpha 2c [Source:MGI Symbol;Acc:MGI:87936]	0.649632	11.1405	0.000844623	0.0048417	1.11087	30.0789	4.14824e-08	3.04778e-07
ENSMUSG00000045333	94187	Zfp423	zinc finger protein 423 [Source:MGI Symbol;Acc:MGI:1891217]	1.13659	18.1576	2.03359e-05	0.000194966	1.2656	20.9855	4.62783e-06	2.18319e-05
ENSMUSG00000045731	18155	Pnoc	prepronociceptin [Source:MGI Symbol;Acc:MGI:105308]	0.466994	3.84549	0.0498801	0.131699	1.60482	42.7235	6.30487e-11	7.52872e-10
ENSMUSG00000045962	232341	Wnk1	WNK lysine deficient protein kinase 1 [Source:MGI Symbol;Acc:MGI:2442092]	1.23359	36.2861	1.70375e-09	4.30047e-08	0.737697	13.1696	0.000284521	0.000862847
ENSMUSG00000046160	50914	Olig1	oligodendrocyte transcription factor 1 [Source:MGI Symbol;Acc:MGI:1355334]	1.14206	10.7767	0.00102783	0.00570661	0.964232	7.70556	0.0055051	0.0120505
ENSMUSG00000046330	19981	Rpl37a	ribosomal protein L37a [Source:MGI Symbol;Acc:MGI:98068]	0.607526	10.6401	0.00110662	0.0060912	0.506048	7.36711	0.00664274	0.0142098
ENSMUSG00000046463	NA	5930403N24Rik	RIKEN cDNA 5930403N24 gene [Source:MGI Symbol;Acc:MGI:2444171]	0.943444	13.8243	0.000200723	0.00143174	0.601986	5.25129	0.0219305	0.0406681
ENSMUSG00000047045	209497	Tmem164	transmembrane protein 164 [Source:MGI Symbol;Acc:MGI:2148020]	0.443074	9.84402	0.00170385	0.00870181	0.997387	48.0945	4.06172e-12	5.82436e-11
ENSMUSG00000047181	217125	Samd14	sterile alpha motif domain containing 14 [Source:MGI Symbol;Acc:MGI:2384945]	1.67416	54.294	1.72624e-13	1.06349e-11	0.491777	4.51422	0.0336142	0.0591869
ENSMUSG00000047675	20116	Rps8	ribosomal protein S8 [Source:MGI Symbol;Acc:MGI:98166]	0.753669	14.0924	0.000174044	0.00126587	0.452148	5.03343	0.0248626	0.0453469
ENSMUSG00000047676	NA	Rpsa-ps10	ribosomal protein SA, pseudogene 10 [Source:MGI Symbol;Acc:MGI:3704228]	1.28265	19.0774	1.2552e-05	0.000127935	0.758411	5.27335	0.0216543	0.040232
ENSMUSG00000047880	12145	Cxcr5	chemokine (C-X-C motif) receptor 5 [Source:MGI Symbol;Acc:MGI:103567]	1.41119	7.95872	0.00478564	0.0206764	1.46767	7.0302	0.00801464	0.016784
ENSMUSG00000048100	99730	Taf13	TATA-box binding protein associated factor 13 [Source:MGI Symbol;Acc:MGI:1913500]	0.478574	6.18766	0.0128644	0.0462973	0.590211	9.34446	0.00223661	0.00540517
ENSMUSG00000048200	213573	Cracr2b	calcium release activated channel regulator 2B [Source:MGI Symbol;Acc:MGI:2446129]	1.51714	16.8354	4.07657e-05	0.000360689	1.25699	8.38469	0.00378395	0.00863761
ENSMUSG00000048240	14708	Gng7	guanine nucleotide binding protein (G protein), gamma 7 [Source:MGI Symbol;Acc:MGI:95787]	1.25927	42.5101	7.03197e-11	2.37744e-09	0.733836	14.6977	0.000126199	0.000419754
ENSMUSG00000048385	170729	Scrt1	scratch family zinc finger 1 [Source:MGI Symbol;Acc:MGI:2176606]	1.88946	55.8045	8.00501e-14	5.43491e-12	0.729478	8.01217	0.00464641	0.010359
ENSMUSG00000048572	226040	Tmem252	transmembrane protein 252 [Source:MGI Symbol;Acc:MGI:3583948]	1.15263	7.9529	0.00480105	0.0207376	0.868267	4.20331	0.0403452	0.0693718
ENSMUSG00000048758	19944	Rpl29	ribosomal protein L29 [Source:MGI Symbol;Acc:MGI:99687]	0.572846	9.89885	0.00165382	0.00849851	0.458356	6.24673	0.0124422	0.0247072
ENSMUSG00000049690	210356	Nckap5	NCK-associated protein 5 [Source:MGI Symbol;Acc:MGI:2686394]	0.808263	8.89751	0.0028556	0.0133983	0.80714	8.66109	0.00325077	0.00755003
ENSMUSG00000050390	97130	C77080	expressed sequence C77080 [Source:MGI Symbol;Acc:MGI:2140651]	1.83778	116.285	4.116e-27	3.35483e-24	0.470077	7.40037	0.00652104	0.0139728
ENSMUSG00000050708	14325	Ftl1	ferritin light polypeptide 1 [Source:MGI Symbol;Acc:MGI:95589]	0.399335	4.64526	0.0311394	0.0923304	0.699217	14.0637	0.000176723	0.000564589
ENSMUSG00000050761	14724	Gp1bb	glycoprotein Ib, beta polypeptide [Source:MGI Symbol;Acc:MGI:107852]	2.17913	63.4534	1.64203e-15	1.60668e-13	1.38958	25.1212	5.38374e-07	3.15439e-06
ENSMUSG00000051427	216516	Ccdc157	coiled-coil domain containing 157 [Source:MGI Symbol;Acc:MGI:3041210]	1.0587	40.2071	2.28419e-10	6.8832e-09	0.375679	4.97667	0.0256914	0.0466744
ENSMUSG00000051506	545030	Wdfy4	WD repeat and FYVE domain containing 4 [Source:MGI Symbol;Acc:MGI:3584510]	0.853923	6.446	0.0111202	0.0412152	1.22211	11.9072	0.000559167	0.00157567
ENSMUSG00000051747	22138	Ttn	titin [Source:MGI Symbol;Acc:MGI:98864]	1.12582	5.44447	0.0196304	0.0647386	1.11575	5.22879	0.022216	0.041124
ENSMUSG00000052062	72823	Pard3b	par-3 family cell polarity regulator beta [Source:MGI Symbol;Acc:MGI:1919301]	1.16482	10.9779	0.00092207	0.00520628	1.48409	16.6372	4.52556e-05	0.000168861
ENSMUSG00000052085	76088	Dock8	dedicator of cytokinesis 8 [Source:MGI Symbol;Acc:MGI:1921396]	0.857646	6.67973	0.00975151	0.0371097	1.0575	9.34961	0.00223033	0.00539156
ENSMUSG00000052146	67097	Rps10	ribosomal protein S10 [Source:MGI Symbol;Acc:MGI:1914347]	0.81375	14.1091	0.000172506	0.00125744	0.598935	7.45138	0.0063388	0.0136227
ENSMUSG00000052397	22350	Ezr	ezrin [Source:MGI Symbol;Acc:MGI:98931]	1.44061	20.2236	6.88985e-06	7.57122e-05	1.70766	27.8233	1.32914e-07	8.87194e-07
ENSMUSG00000052934	76454	Fbxo31	F-box protein 31 [Source:MGI Symbol;Acc:MGI:1354708]	1.7683	126.806	2.04869e-29	2.83983e-26	0.422584	7.55303	0.00599094	0.0129588
ENSMUSG00000053012	57896	Krcc1	lysine-rich coiled-coil 1 [Source:MGI Symbol;Acc:MGI:1889377]	0.58881	4.82884	0.0279875	0.0850931	0.879868	10.5729	0.00114758	0.00299386
ENSMUSG00000053110	22601	Yap1	yes-associated protein 1 [Source:MGI Symbol;Acc:MGI:103262]	0.574023	4.45909	0.034716	0.100394	0.609842	4.98322	0.0255943	0.0465321
ENSMUSG00000053158	14159	Fes	feline sarcoma oncogene [Source:MGI Symbol;Acc:MGI:95514]	1.39444	19.3728	1.07526e-05	0.000111647	1.20942	12.5187	0.00040289	0.00117553
ENSMUSG00000053166	104010	Cdh22	cadherin 22 [Source:MGI Symbol;Acc:MGI:1341843]	0.56672	6.99277	0.00818395	0.0321445	1.35963	36.9783	1.19452e-09	1.16743e-08
ENSMUSG00000053552	228598	Ebf4	early B cell factor 4 [Source:MGI Symbol;Acc:MGI:2385972]	0.985793	11.6039	0.000658128	0.00392203	0.623859	4.3263	0.0375277	0.0650491
ENSMUSG00000053617	14218	Sh3pxd2a	SH3 and PX domains 2A [Source:MGI Symbol;Acc:MGI:1298393]	1.38857	73.5083	1.00216e-17	1.47522e-15	0.411611	6.43935	0.0111619	0.0224507
ENSMUSG00000054934	58802	Kcnmb4	potassium large conductance calcium-activated channel, subfamily M, beta member 4 [Source:MGI Symbol;Acc:MGI:1913272]	0.871342	15.6484	7.62753e-05	0.000619816	0.616689	7.64094	0.00570581	0.0124342
ENSMUSG00000055013	347722	Agap1	ArfGAP with GTPase domain, ankyrin repeat and PH domain 1 [Source:MGI Symbol;Acc:MGI:2653690]	1.8671	158.706	2.1692e-36	1.80413e-32	0.417472	8.3187	0.00392389	0.00892642
ENSMUSG00000055053	18029	Nfic	nuclear factor I/C [Source:MGI Symbol;Acc:MGI:109591]	1.60314	74.7799	5.26218e-18	8.18048e-16	0.725261	15.6151	7.76319e-05	0.000272605
ENSMUSG00000055322	21961	Tns1	tensin 1 [Source:MGI Symbol;Acc:MGI:104552]	1.53255	48.683	3.00857e-12	1.40575e-10	0.793176	12.9855	0.000313907	0.000940479
ENSMUSG00000055538	71918	Zcchc24	zinc finger, CCHC domain containing 24 [Source:MGI Symbol;Acc:MGI:1919168]	0.626971	4.22698	0.0397861	0.111678	1.71669	30.1091	4.08405e-08	3.00461e-07
ENSMUSG00000055762	66656	Eef1d	eukaryotic translation elongation factor 1 delta (guanine nucleotide exchange protein) [Source:MGI Symbol;Acc:MGI:1913906]	0.438139	5.68998	0.0170621	0.0580158	0.567298	9.47452	0.00208345	0.00508155
ENSMUSG00000055945	320111	Prr18	proline rich 18 [Source:MGI Symbol;Acc:MGI:2443403]	2.85089	97.7066	4.85191e-23	1.83424e-20	1.151	17.284	3.2188e-05	0.000123881
ENSMUSG00000057286	20446	St6galnac2	ST6 (alpha-N-acetyl-neuraminyl-2,3-beta-galactosyl-1,3)-N-acetylgalactosaminide alpha-2,6-sialyltransferase 2 [Source:MGI Symbol;Acc:MGI:107553]	0.843171	4.044	0.0443286	0.120642	0.897229	4.23402	0.0396214	0.0682189
ENSMUSG00000057329	12043	Bcl2	B cell leukemia/lymphoma 2 [Source:MGI Symbol;Acc:MGI:88138]	0.408764	6.00939	0.0142299	0.0501697	0.450774	7.24061	0.00712727	0.0151083
ENSMUSG00000057880	268860	Abat	4-aminobutyrate aminotransferase [Source:MGI Symbol;Acc:MGI:2443582]	0.498816	4.14537	0.0417486	0.115683	0.774698	9.92431	0.0016311	0.00408856
ENSMUSG00000058056	72333	Palld	palladin, cytoskeletal associated protein [Source:MGI Symbol;Acc:MGI:1919583]	1.11445	14.3524	0.000151583	0.00112176	0.872769	8.4032	0.00374561	0.00856184
ENSMUSG00000058441	406218	Panx2	pannexin 2 [Source:MGI Symbol;Acc:MGI:1890615]	1.27448	48.1188	4.01165e-12	1.81331e-10	1.26236	44.7984	2.184e-11	2.81353e-10
ENSMUSG00000058966	68952	Fam57b	family with sequence similarity 57, member B [Source:MGI Symbol;Acc:MGI:1916202]	0.553038	8.82591	0.00296983	0.0138376	0.604617	10.3673	0.00128269	0.00330437
ENSMUSG00000059070	19899	Rpl18	ribosomal protein L18 [Source:MGI Symbol;Acc:MGI:98003]	0.593846	8.57347	0.00341096	0.0155659	0.673011	10.664	0.00109239	0.00286594
ENSMUSG00000059213	13199	Ddn	dendrin [Source:MGI Symbol;Acc:MGI:108101]	1.67101	52.8198	3.65604e-13	2.08985e-11	0.904639	15.9948	6.35176e-05	0.000228
ENSMUSG00000060376	12039	Bckdha	branched chain ketoacid dehydrogenase E1, alpha polypeptide [Source:MGI Symbol;Acc:MGI:107701]	0.729766	8.91029	0.00283568	0.0133207	0.716068	8.40724	0.00373729	0.00854634
ENSMUSG00000060636	57808	Rpl35a	ribosomal protein L35A [Source:MGI Symbol;Acc:MGI:1928894]	0.425031	4.11944	0.042393	0.116962	0.575231	7.49787	0.00617719	0.0133098
ENSMUSG00000061436	15258	Hipk2	homeodomain interacting protein kinase 2 [Source:MGI Symbol;Acc:MGI:1314872]	1.1214	12.5799	0.000389918	0.00251684	1.45645	20.7152	5.32923e-06	2.47892e-05
ENSMUSG00000062151	208898	Unc13c	unc-13 homolog C (C. elegans) [Source:MGI Symbol;Acc:MGI:2149021]	1.04431	32.3505	1.28725e-08	2.70014e-07	1.47435	62.3639	2.85506e-15	6.85296e-14
ENSMUSG00000062908	11364	Acadm	acyl-Coenzyme A dehydrogenase, medium chain [Source:MGI Symbol;Acc:MGI:87867]	0.387416	3.86963	0.0491674	0.130376	0.79859	16.188	5.73573e-05	0.000208315
ENSMUSG00000062960	16542	Kdr	kinase insert domain protein receptor [Source:MGI Symbol;Acc:MGI:96683]	1.10895	4.76181	0.0290979	0.0876928	1.31648	6.42393	0.0112593	0.0226083
ENSMUSG00000063457	20054	Rps15	ribosomal protein S15 [Source:MGI Symbol;Acc:MGI:98117]	0.400311	3.95334	0.0467785	0.125608	0.84387	17.3437	3.11925e-05	0.000120552
ENSMUSG00000063558	11761	Aox1	aldehyde oxidase 1 [Source:MGI Symbol;Acc:MGI:88035]	1.01701	7.92003	0.00488906	0.0210516	0.792419	4.62672	0.0314777	0.0558984
ENSMUSG00000064247	403178	Plcxd1	phosphatidylinositol-specific phospholipase C, X domain containing 1 [Source:MGI Symbol;Acc:MGI:2685422]	0.775574	19.7802	8.68766e-06	9.26193e-05	0.486869	7.31738	0.00682908	0.0145411
ENSMUSG00000066406	75547	Akap13	A kinase (PRKA) anchor protein 13 [Source:MGI Symbol;Acc:MGI:2676556]	0.76703	15.5386	8.08364e-05	0.000653051	0.389807	4.00493	0.0453673	0.0768473
ENSMUSG00000067274	11837	Rplp0	ribosomal protein, large, P0 [Source:MGI Symbol;Acc:MGI:1927636]	0.613114	15.8813	6.74401e-05	0.000556172	0.704398	20.8554	4.95296e-06	2.31882e-05
ENSMUSG00000067889	20743	Sptbn2	spectrin beta, non-erythrocytic 2 [Source:MGI Symbol;Acc:MGI:1313261]	2.70639	20.0443	7.56677e-06	8.18904e-05	1.53151	6.96779	0.00829897	0.0173011
ENSMUSG00000068267	12616	Cenpb	centromere protein B [Source:MGI Symbol;Acc:MGI:88376]	1.50815	41.0648	1.47267e-10	4.56171e-09	0.998611	18.048	2.15401e-05	8.64827e-05
ENSMUSG00000068699	68794	Flnc	filamin C, gamma [Source:MGI Symbol;Acc:MGI:95557]	0.981736	7.99685	0.00468588	0.0203406	1.38574	12.5067	0.0004055	0.0011819
ENSMUSG00000069601	11735	Ank3	ankyrin 3, epithelial [Source:MGI Symbol;Acc:MGI:88026]	1.71624	17.3529	3.10417e-05	0.000284803	1.18932	8.567	0.00342311	0.00791054
ENSMUSG00000069833	66395	Ahnak	AHNAK nucleoprotein (desmoyokin) [Source:MGI Symbol;Acc:MGI:1316648]	1.29129	15.8904	6.71175e-05	0.000554336	1.57791	22.7571	1.83825e-06	9.50497e-06
ENSMUSG00000070327	672511	Rnf213	ring finger protein 213 [Source:MGI Symbol;Acc:MGI:1289196]	0.543055	4.65501	0.030963	0.0919547	0.767021	9.01914	0.00267168	0.00634111
ENSMUSG00000070604	75690	Vsig10l	V-set and immunoglobulin domain containing 10 like [Source:MGI Symbol;Acc:MGI:1922940]	0.701914	8.50884	0.00353426	0.0160231	1.17758	20.0269	7.63594e-06	3.41441e-05
ENSMUSG00000071042	240168	Rasgrp3	RAS, guanyl releasing protein 3 [Source:MGI Symbol;Acc:MGI:3028579]	0.510279	4.00665	0.0453211	0.12286	0.511147	3.96107	0.0465642	0.0786344
ENSMUSG00000071644	67160	Eef1g	eukaryotic translation elongation factor 1 gamma [Source:MGI Symbol;Acc:MGI:1914410]	0.603958	15.0365	0.000105452	0.00082197	0.392595	6.33599	0.0118312	0.0236311
ENSMUSG00000071649	72727	B3gat3	beta-1,3-glucuronyltransferase 3 (glucuronosyltransferase I) [Source:MGI Symbol;Acc:MGI:1919977]	0.410012	9.51945	0.00203306	0.0101221	0.943926	49.2779	2.22148e-12	3.31409e-11
ENSMUSG00000073436	193838	Eme2	essential meiotic structure-specific endonuclease subunit 2 [Source:MGI Symbol;Acc:MGI:1919889]	0.639723	9.88464	0.00166664	0.00854592	0.524624	6.43048	0.0112179	0.0225336
ENSMUSG00000073600	381148	Prob1	proline rich basic protein 1 [Source:MGI Symbol;Acc:MGI:2686460]	1.77777	49.9795	1.55365e-12	7.55653e-11	0.898532	11.8234	0.000584903	0.00164069
ENSMUSG00000073985	NA	Gm10602	predicted gene 10602 [Source:MGI Symbol;Acc:MGI:3708759]	0.655402	5.21656	0.0223728	0.0714847	0.622891	4.13141	0.0420944	0.0719955
ENSMUSG00000074093	75744	Svip	small VCP/p97-interacting protein [Source:MGI Symbol;Acc:MGI:1922994]	0.420428	5.07786	0.0242333	0.0761133	0.412295	4.87161	0.0273021	0.049299
ENSMUSG00000074102	109095	Rbm15b	RNA binding motif protein 15B [Source:MGI Symbol;Acc:MGI:1923598]	0.466685	10.115	0.00147071	0.00770512	0.310164	4.44417	0.0350206	0.0613515
ENSMUSG00000074129	22121	Rpl13a	ribosomal protein L13A [Source:MGI Symbol;Acc:MGI:1351455]	0.836945	15.4591	8.43103e-05	0.000677169	0.752864	12.5208	0.000402445	0.00117464
ENSMUSG00000074896	15959	Ifit3	interferon-induced protein with tetratricopeptide repeats 3 [Source:MGI Symbol;Acc:MGI:1101055]	0.566328	4.75944	0.0291379	0.087725	0.553569	4.44238	0.0350573	0.0614029
ENSMUSG00000074923	214230	Pak6	p21 protein (Cdc42/Rac)-activated kinase 6 [Source:MGI Symbol;Acc:MGI:2679420]	1.64521	143.231	5.23388e-33	2.17651e-29	0.463377	11.5107	0.00069196	0.00190501
ENSMUSG00000075014	NA	Gm10800	predicted gene 10800 [Source:MGI Symbol;Acc:MGI:3641657]	3.85454	15.8793	6.75142e-05	0.000556507	3.5245	12.5103	0.000404713	0.00118022
ENSMUSG00000075015	NA	Gm10801	predicted gene 10801 [Source:MGI Symbol;Acc:MGI:3641656]	3.47194	13.1675	0.000284843	0.00192292	4.04332	13.1044	0.000294605	0.000888891
ENSMUSG00000075284	215280	Wipf1	WAS/WASL interacting protein family, member 1 [Source:MGI Symbol;Acc:MGI:2178801]	1.45148	39.0795	4.06904e-10	1.16899e-08	0.988823	17.8885	2.34228e-05	9.30536e-05
ENSMUSG00000075595	268469	Zfp652	zinc finger protein 652 [Source:MGI Symbol;Acc:MGI:2442221]	0.633968	14.3681	0.00015033	0.00111484	0.508731	9.16344	0.00246897	0.00591175
ENSMUSG00000075602	110454	Ly6a	lymphocyte antigen 6 complex, locus A [Source:MGI Symbol;Acc:MGI:107527]	1.65617	10.4133	0.00125114	0.006746	1.48877	8.2609	0.00405081	0.00918514
ENSMUSG00000076258	NA	Gm23935	predicted gene, 23935 [Source:MGI Symbol;Acc:MGI:5453712]	1.31617	37.7297	8.1257e-10	2.1942e-08	0.809046	14.3818	0.000149237	0.000485888
ENSMUSG00000078350	68859	Smim1	small integral membrane protein 1 [Source:MGI Symbol;Acc:MGI:1916109]	0.475745	4.09204	0.0430855	0.118191	0.549126	5.27341	0.0216535	0.040232
ENSMUSG00000078591	628779	Hs3st4	heparan sulfate (glucosamine) 3-O-sulfotransferase 4 [Source:MGI Symbol;Acc:MGI:1333792]	0.378703	7.02277	0.00804795	0.0317151	0.28122	3.87391	0.0490421	0.0821435
ENSMUSG00000078771	14017	Evi2a	ecotropic viral integration site 2a [Source:MGI Symbol;Acc:MGI:95458]	0.607752	5.59142	0.0180486	0.060663	1.20991	21.594	3.36902e-06	1.64582e-05
ENSMUSG00000078794	629378	Dact3	dishevelled-binding antagonist of beta-catenin 3 [Source:MGI Symbol;Acc:MGI:3654828]	2.01814	74.8592	5.055e-18	8.00809e-16	0.675755	8.88219	0.00287966	0.00677418
ENSMUSG00000079018	17067	Ly6c1	lymphocyte antigen 6 complex, locus C1 [Source:MGI Symbol;Acc:MGI:96882]	1.59138	7.33262	0.00677145	0.0274254	1.34848	5.27063	0.0216882	0.0402815
ENSMUSG00000079020	106068	Slc45a4	solute carrier family 45, member 4 [Source:MGI Symbol;Acc:MGI:2146236]	0.426262	6.11136	0.0134316	0.0479134	1.02326	34.1401	5.1284e-09	4.4827e-08
ENSMUSG00000079499	NA	6530402F18Rik	RIKEN cDNA 6530402F18 gene [Source:MGI Symbol;Acc:MGI:1923470]	1.14483	11.1436	0.00084324	0.00483837	1.14525	9.75824	0.00178521	0.00442682
ENSMUSG00000081058	97114	Hist2h3c2	histone cluster 2, H3c2 [Source:MGI Symbol;Acc:MGI:2448357]	1.07193	7.40947	0.00648814	0.0264903	1.36386	10.4583	0.00122097	0.00316349
ENSMUSG00000082978	NA	Rpsa-ps11	ribosomal protein SA, pseudogene 11 [Source:MGI Symbol;Acc:MGI:3649246]	1.05979	18.5136	1.68697e-05	0.000165065	0.908216	10.7097	0.00106577	0.0028033
ENSMUSG00000086324	NA	Gm15564	predicted gene 15564 [Source:MGI Symbol;Acc:MGI:3783013]	1.0467	19.2991	1.11762e-05	0.000115397	0.624402	6.96094	0.00833081	0.0173565
ENSMUSG00000086697	NA	4933427G23Rik	RIKEN cDNA 4933427G23 gene [Source:MGI Symbol;Acc:MGI:3036235]	1.33765	21.3563	3.81374e-06	4.46431e-05	0.677983	4.56408	0.0326492	0.057677
ENSMUSG00000089682	12050	Bcl2l2	BCL2-like 2 [Source:MGI Symbol;Acc:MGI:108052]	0.873326	25.6305	4.13448e-07	6.00637e-06	0.337767	3.8649	0.0493063	0.0825111
ENSMUSG00000091549	NA	Gm6548	predicted gene 6548 [Source:MGI Symbol;Acc:MGI:3644071]	0.685501	4.33927	0.0372429	0.10597	0.788632	5.44293	0.0196477	0.0369455
ENSMUSG00000092368	NA	A930015D03Rik	RIKEN cDNA A930015D03 gene [Source:MGI Symbol;Acc:MGI:1925060]	1.2199	4.44811	0.0349398	0.100901	1.55661	5.70963	0.0168721	0.0323107
ENSMUSG00000094910	268595	D430019H16Rik	RIKEN cDNA D430019H16 gene [Source:MGI Symbol;Acc:MGI:2443127]	1.58412	129.393	5.56323e-30	9.25388e-27	0.401782	8.60077	0.00336021	0.0077749
ENSMUSG00000096188	97487	Cmtm4	CKLF-like MARVEL transmembrane domain containing 4 [Source:MGI Symbol;Acc:MGI:2142888]	0.306795	3.85135	0.0497061	0.131374	0.719796	20.9247	4.77688e-06	2.24586e-05
ENSMUSG00000096847	210573	Tmem151b	transmembrane protein 151B [Source:MGI Symbol;Acc:MGI:2685169]	0.58656	4.61976	0.0316056	0.0934628	0.841178	9.42186	0.00214414	0.00520797
ENSMUSG00000097415	NA	AU020206	expressed sequence AU020206 [Source:MGI Symbol;Acc:MGI:2142134]	1.02918	5.12041	0.023646	0.0745929	1.24447	6.03166	0.0140515	0.0275206
ENSMUSG00000098112	668218	Bin2	bridging integrator 2 [Source:MGI Symbol;Acc:MGI:3611448]	0.89076	5.24456	0.0220155	0.0706414	1.05929	6.84961	0.00886608	0.0183011
