# Supplementary material for: The Differences in Local Translatome across Distinct Neuron Types Is Mediated by Both Baseline Cellular Differences and Post-transcriptional Mechanisms
Source: eNeuro. 2019 Feb 4;5(6):ENEURO.0320-18.2018. doi: 10.1523/ENEURO.0320-18.2018 (PMC6361723; doi:10.1523/ENEURO.0320-18.2018)
Supplement: Figure 3-3 — Table of RBP4 somatic translation candidates. Full table of RBP4 somatic translation candidates. Table of transcripts enriched by TRAP but depleted by cellular fractionation in RBP4-TRAP mice. Column names are as in Figure 2-1. Download Figure 3-3, XLS file. [file sup_enu-eN-NWR-0320-18-s07.xls]

## Sheet: Figure3-4_SomaticCandidates_Rbp
ensembl_gene_id	entrezgene	external_gene_name	description	logFC_TRAP	logCPM_TRAP	LR_TRAP	PValue_TRAP	FDR_TRAP	logFC_Column	logCPM_Column	LR_Column	PValue_Column	FDR_Column
ENSMUSG00000000134	209446	Tfe3	transcription factor E3 [Source:MGI Symbol;Acc:MGI:98511]	0.46322	4.65034	5.76973	0.0163046	0.0382798	-0.480122	4.65034	5.99852	0.0143179	0.0388897
ENSMUSG00000000168	235339	Dlat	dihydrolipoamide S-acetyltransferase (E2 component of pyruvate dehydrogenase complex) [Source:MGI Symbol;Acc:MGI:2385311]	0.82475	6.55442	12.9706	0.000316424	0.00152925	-0.867899	6.55442	14.2092	0.000163567	0.00103307
ENSMUSG00000000253	66355	Gmpr	guanosine monophosphate reductase [Source:MGI Symbol;Acc:MGI:1913605]	1.42415	5.63484	35.6206	2.39736e-09	7.61661e-08	-0.547685	5.63484	5.34494	0.0207825	0.05226
ENSMUSG00000000355	68995	Mcts1	malignant T cell amplified sequence 1 [Source:MGI Symbol;Acc:MGI:1916245]	0.869942	6.76065	16.1068	5.98686e-05	0.000386416	-0.445263	6.76065	4.23536	0.0395903	0.0864412
ENSMUSG00000000568	11991	Hnrnpd	heterogeneous nuclear ribonucleoprotein D [Source:MGI Symbol;Acc:MGI:101947]	0.871789	6.2407	11.5318	0.000684141	0.00285697	-0.694286	6.2407	7.28989	0.00693438	0.0216457
ENSMUSG00000000581	57316	C1d	C1D nuclear receptor co-repressor [Source:MGI Symbol;Acc:MGI:1927354]	0.794667	7.20168	9.54578	0.0020041	0.00695711	-0.556905	7.20168	4.69949	0.0301716	0.0699654
ENSMUSG00000000776	67065	Polr3d	polymerase (RNA) III (DNA directed) polypeptide D [Source:MGI Symbol;Acc:MGI:1914315]	0.903616	3.6051	15.2241	9.54747e-05	0.000567135	-0.67478	3.6051	8.05731	0.00453203	0.0154084
ENSMUSG00000000902	20587	Smarcb1	SWI/SNF related, matrix associated, actin dependent regulator of chromatin, subfamily b, member 1 [Source:MGI Symbol;Acc:MGI:1328366]	0.586358	6.35282	11.486	0.000701205	0.00291434	-0.43103	6.35282	6.15159	0.0131294	0.0362484
ENSMUSG00000001016	67781	Ilf2	interleukin enhancer binding factor 2 [Source:MGI Symbol;Acc:MGI:1915031]	0.605418	6.77611	11.8441	0.000578444	0.00249381	-0.478889	6.77611	7.36485	0.00665112	0.0209526
ENSMUSG00000001017	66511	Chtop	chromatin target of PRMT1 [Source:MGI Symbol;Acc:MGI:1913761]	0.543192	5.68133	4.35539	0.0368921	0.0744634	-0.606738	5.68133	5.37206	0.0204618	0.051585
ENSMUSG00000001054	66089	Rmnd5b	required for meiotic nuclear division 5 homolog B [Source:MGI Symbol;Acc:MGI:1913339]	0.546654	5.95952	9.47951	0.0020778	0.00717625	-0.631725	5.95952	12.4257	0.000423458	0.00225398
ENSMUSG00000001105	55978	Ift20	intraflagellar transport 20 [Source:MGI Symbol;Acc:MGI:1915585]	0.854626	6.94733	18.3773	1.81203e-05	0.000142708	-0.528477	6.94733	7.03608	0.00798837	0.0242559
ENSMUSG00000001120	59093	Pcbp3	poly(rC) binding protein 3 [Source:MGI Symbol;Acc:MGI:1890470]	0.855973	5.34592	11.273	0.000786418	0.00320607	-0.729471	5.34592	8.10089	0.00442435	0.0151312
ENSMUSG00000001380	15115	Hars	histidyl-tRNA synthetase [Source:MGI Symbol;Acc:MGI:108087]	1.15466	7.06849	44.4455	2.6154e-11	1.60708e-09	-0.41642	7.06849	5.8478	0.0155965	0.0416412
ENSMUSG00000001383	66492	Zmat2	zinc finger, matrin type 2 [Source:MGI Symbol;Acc:MGI:1913742]	1.10648	8.84604	23.8822	1.02413e-06	1.30843e-05	-0.538887	8.84604	5.75743	0.016419	0.0434363
ENSMUSG00000001472	66855	Tcf25	transcription factor 25 (basic helix-loop-helix) [Source:MGI Symbol;Acc:MGI:1914105]	0.763772	9.5298	13.0777	0.000298837	0.00146066	-0.447136	9.5298	4.51116	0.0336744	0.0762641
ENSMUSG00000001569	433864	Nom1	nucleolar protein with MIF4G domain 1 [Source:MGI Symbol;Acc:MGI:1861749]	0.540487	4.98378	7.14452	0.00751934	0.0205167	-0.626169	4.98378	9.32242	0.00226367	0.00877586
ENSMUSG00000001707	66143	Eef1e1	eukaryotic translation elongation factor 1 epsilon 1 [Source:MGI Symbol;Acc:MGI:1913393]	0.81577	5.52149	10.7025	0.00106991	0.00413541	-0.820913	5.52149	10.6742	0.00108642	0.0048646
ENSMUSG00000001924	22201	Uba1	ubiquitin-like modifier activating enzyme 1 [Source:MGI Symbol;Acc:MGI:98890]	0.718766	8.52303	13.7813	0.000205365	0.00107101	-0.380671	8.52303	3.8852	0.0487133	0.102445
ENSMUSG00000002052	20926	Supt6	suppressor of Ty 6 [Source:MGI Symbol;Acc:MGI:107726]	0.502993	6.33849	4.96481	0.0258682	0.0556975	-0.452423	6.33849	3.99013	0.0457674	0.0973682
ENSMUSG00000002280	67563	Narfl	nuclear prelamin A recognition factor-like [Source:MGI Symbol;Acc:MGI:1914813]	0.659234	3.27232	8.47543	0.00359975	0.0112934	-0.642183	3.27232	7.52664	0.00607932	0.0195553
ENSMUSG00000002307	13163	Daxx	Fas death domain-associated protein [Source:MGI Symbol;Acc:MGI:1197015]	0.850268	3.64184	13.8495	0.000198052	0.00104018	-0.504633	3.64184	4.63154	0.0313893	0.0722007
ENSMUSG00000002458	56470	Rgs19	regulator of G-protein signaling 19 [Source:MGI Symbol;Acc:MGI:1915153]	1.01169	4.38089	13.6253	0.000223155	0.00114478	-0.542635	4.38089	3.87212	0.0490945	0.103035
ENSMUSG00000002477	20641	Snrpd1	small nuclear ribonucleoprotein D1 [Source:MGI Symbol;Acc:MGI:98344]	0.969641	4.94416	17.4884	2.89065e-05	0.000210738	-0.496234	4.94416	4.52683	0.0333674	0.0756711
ENSMUSG00000002524	67959	Puf60	poly-U binding splicing factor 60 [Source:MGI Symbol;Acc:MGI:1915209]	0.78008	6.37005	14.0708	0.00017606	0.000943581	-0.652094	6.37005	9.76222	0.00178135	0.00719011
ENSMUSG00000002635	68079	Pdcd2l	programmed cell death 2-like [Source:MGI Symbol;Acc:MGI:1915329]	0.760485	3.96403	11.1065	0.00086024	0.00344486	-0.539174	3.96403	5.37357	0.0204441	0.0515559
ENSMUSG00000002679	69792	Med6	mediator complex subunit 6 [Source:MGI Symbol;Acc:MGI:1917042]	0.540174	4.66882	6.70333	0.00962329	0.0250358	-0.601899	4.66882	8.07882	0.00447857	0.0152792
ENSMUSG00000002728	67877	Naa20	N(alpha)-acetyltransferase 20, NatB catalytic subunit [Source:MGI Symbol;Acc:MGI:1915127]	1.30837	5.77221	40.4322	2.03555e-10	9.41757e-09	-0.592463	5.77221	8.33127	0.00389683	0.0136016
ENSMUSG00000002797	110175	Ggct	gamma-glutamyl cyclotransferase [Source:MGI Symbol;Acc:MGI:95700]	0.813769	4.47396	18.6383	1.58017e-05	0.000127685	-0.434763	4.47396	5.14131	0.023363	0.0573814
ENSMUSG00000002833	15193	Hdgfrp2	hepatoma-derived growth factor, related protein 2 [Source:MGI Symbol;Acc:MGI:1194492]	1.11011	4.25712	24.1458	8.93092e-07	1.15921e-05	-0.545529	4.25712	5.6806	0.0171535	0.0449611
ENSMUSG00000003099	19060	Ppp5c	protein phosphatase 5, catalytic subunit [Source:MGI Symbol;Acc:MGI:102666]	0.99215	4.77217	25.5032	4.4166e-07	6.47627e-06	-0.515508	4.77217	6.72589	0.00950232	0.0278998
ENSMUSG00000003135	52846	Cnot11	CCR4-NOT transcription complex, subunit 11 [Source:MGI Symbol;Acc:MGI:106580]	0.823654	3.40494	13.4521	0.00024473	0.00123395	-0.770916	3.40494	10.9327	0.0009448	0.00434091
ENSMUSG00000003269	19158	Cyth2	cytohesin 2 [Source:MGI Symbol;Acc:MGI:1334255]	1.23886	5.34386	33.7894	6.14136e-09	1.65629e-07	-0.482787	5.34386	5.11495	0.0237205	0.0580724
ENSMUSG00000003299	66163	Mrpl4	mitochondrial ribosomal protein L4 [Source:MGI Symbol;Acc:MGI:2137210]	1.08774	5.14834	32.604	1.1298e-08	2.76274e-07	-0.425619	5.14834	4.93715	0.0262853	0.0629548
ENSMUSG00000003309	11768	Ap1m2	adaptor protein complex AP-1, mu 2 subunit [Source:MGI Symbol;Acc:MGI:1336974]	1.11001	0.528524	8.54905	0.00345703	0.0109439	-1.05737	0.528524	6.0836	0.0136442	0.0374357
ENSMUSG00000003354	105833	Ccdc65	coiled-coil domain containing 65 [Source:MGI Symbol;Acc:MGI:2146001]	0.863912	3.32481	14.8865	0.000114176	0.000658005	-0.704237	3.32481	9.19578	0.00242574	0.00927764
ENSMUSG00000003527	27886	Dgcr14	DiGeorge syndrome critical region gene 14 [Source:MGI Symbol;Acc:MGI:107854]	0.680297	4.21514	11.5942	0.000661588	0.0027787	-0.522326	4.21514	6.56955	0.0103738	0.0299108
ENSMUSG00000003662	26371	Ciao1	cytosolic iron-sulfur protein assembly 1 [Source:MGI Symbol;Acc:MGI:1346998]	0.377279	5.81928	4.18393	0.0408088	0.080947	-0.522314	5.81928	7.88595	0.00498202	0.0165853
ENSMUSG00000003808	66590	Farsa	phenylalanyl-tRNA synthetase, alpha subunit [Source:MGI Symbol;Acc:MGI:1913840]	0.587491	5.18811	9.55854	0.00199021	0.00691503	-0.556215	5.18811	8.37436	0.00380551	0.0133189
ENSMUSG00000003923	21780	Tfam	transcription factor A, mitochondrial [Source:MGI Symbol;Acc:MGI:107810]	0.741637	5.09552	13.3194	0.00026267	0.00131179	-0.737652	5.09552	12.8203	0.000342875	0.00190329
ENSMUSG00000003992	66970	Ssbp2	single-stranded DNA binding protein 2 [Source:MGI Symbol;Acc:MGI:1914220]	0.472866	6.94359	5.39861	0.0201529	0.0456022	-0.494341	6.94359	5.86753	0.0154227	0.041269
ENSMUSG00000004018	67030	Fancl	Fanconi anemia, complementation group L [Source:MGI Symbol;Acc:MGI:1914280]	0.534596	3.31315	6.39715	0.0114304	0.0288555	-0.892052	3.31315	16.2409	5.57756e-05	0.000430177
ENSMUSG00000004069	83945	Dnaja3	DnaJ heat shock protein family (Hsp40) member A3 [Source:MGI Symbol;Acc:MGI:1933786]	0.564163	6.23746	7.89914	0.00494583	0.0146687	-0.687122	6.23746	11.5546	0.000675831	0.00330913
ENSMUSG00000004071	66626	Cdip1	cell death inducing Trp53 target 1 [Source:MGI Symbol;Acc:MGI:1913876]	0.827902	7.99082	19.7889	8.64844e-06	7.82511e-05	-0.65333	7.99082	12.3288	0.000446017	0.00235207
ENSMUSG00000004099	13433	Dnmt1	DNA methyltransferase (cytosine-5) 1 [Source:MGI Symbol;Acc:MGI:94912]	0.593004	4.47144	7.22754	0.00717937	0.0197887	-0.63128	4.47144	7.92821	0.00486698	0.0162929
ENSMUSG00000004151	14009	Etv1	ets variant 1 [Source:MGI Symbol;Acc:MGI:99254]	1.01905	6.11699	28.8293	7.90477e-08	1.47994e-06	-0.996006	6.11699	26.9727	2.06346e-07	4.22128e-06
ENSMUSG00000004267	13807	Eno2	enolase 2, gamma neuronal [Source:MGI Symbol;Acc:MGI:95394]	0.909214	9.80539	12.9577	0.0003186	0.00153799	-0.646673	9.80539	6.60279	0.0101819	0.0294637
ENSMUSG00000004268	14791	Emg1	EMG1 N1-specific pseudouridine methyltransferase [Source:MGI Symbol;Acc:MGI:1315195]	0.686485	5.22635	13.6762	0.000217187	0.00111826	-0.450973	5.22635	5.78864	0.01613	0.0428
ENSMUSG00000004364	26554	Cul3	cullin 3 [Source:MGI Symbol;Acc:MGI:1347360]	0.615438	7.10813	14.191	0.000165163	0.000893743	-0.407352	7.10813	6.19196	0.0128332	0.0356376
ENSMUSG00000004642	20492	Slbp	stem-loop binding protein [Source:MGI Symbol;Acc:MGI:108402]	0.908771	4.50345	12.8275	0.00034156	0.00162498	-0.923974	4.50345	12.8504	0.00033741	0.00187792
ENSMUSG00000004698	79221	Hdac9	histone deacetylase 9 [Source:MGI Symbol;Acc:MGI:1931221]	0.802573	4.57496	7.71689	0.00547065	0.0158827	-0.870833	4.57496	8.88655	0.00287279	0.0106078
ENSMUSG00000004771	53869	Rab11a	RAB11A, member RAS oncogene family [Source:MGI Symbol;Acc:MGI:1858202]	0.798593	7.30781	14.7803	0.000120792	0.00068921	-0.673914	7.30781	10.5008	0.00119322	0.00526191
ENSMUSG00000004789	78920	Dlst	dihydrolipoamide S-succinyltransferase (E2 component of 2-oxo-glutarate complex) [Source:MGI Symbol;Acc:MGI:1926170]	0.625156	6.27501	12.3117	0.00045013	0.00203639	-0.468131	6.27501	6.8408	0.0089099	0.0265053
ENSMUSG00000004843	68942	Chmp2b	charged multivesicular body protein 2B [Source:MGI Symbol;Acc:MGI:1916192]	0.878132	6.29614	11.7231	0.000617287	0.00262365	-1.06945	6.29614	17.0974	3.55118e-05	0.000297558
ENSMUSG00000004895	94315	Prcc	papillary renal cell carcinoma (translocation-associated) [Source:MGI Symbol;Acc:MGI:2137738]	0.682292	3.77119	8.38777	0.00377754	0.0117545	-0.789529	3.77119	10.6437	0.00110446	0.00493534
ENSMUSG00000004936	26395	Map2k1	mitogen-activated protein kinase kinase 1 [Source:MGI Symbol;Acc:MGI:1346866]	0.789399	7.99262	12.3197	0.000448197	0.00202929	-0.917396	7.99262	16.5122	4.83372e-05	0.000383384
ENSMUSG00000004994	67736	Ccdc130	coiled-coil domain containing 130 [Source:MGI Symbol;Acc:MGI:1914986]	0.508094	2.99614	3.94027	0.0471432	0.0909519	-0.810093	2.99614	9.3304	0.00225383	0.00874779
ENSMUSG00000005069	19305	Pex5	peroxisomal biogenesis factor 5 [Source:MGI Symbol;Acc:MGI:1098808]	0.507003	4.97009	4.50118	0.0338715	0.0694615	-0.646742	4.97009	7.14717	0.00750822	0.0230805
ENSMUSG00000005204	80886	Senp3	SUMO/sentrin specific peptidase 3 [Source:MGI Symbol;Acc:MGI:2158736]	0.480827	5.21106	4.89585	0.0269214	0.057544	-0.679984	5.21106	9.55433	0.00199478	0.00790141
ENSMUSG00000005410	17218	Mcm5	minichromosome maintenance complex component 5 [Source:MGI Symbol;Acc:MGI:103197]	0.655124	2.78556	7.98738	0.00471046	0.0140802	-0.592121	2.78556	5.97019	0.0145497	0.0394301
ENSMUSG00000005469	18747	Prkaca	protein kinase, cAMP dependent, catalytic, alpha [Source:MGI Symbol;Acc:MGI:97592]	0.807196	6.69255	17.7941	2.46145e-05	0.000184581	-0.523836	6.69255	7.48007	0.00623856	0.0199565
ENSMUSG00000005483	81489	Dnajb1	DnaJ heat shock protein family (Hsp40) member B1 [Source:MGI Symbol;Acc:MGI:1931874]	0.729732	5.31952	9.31918	0.00226767	0.00770669	-0.829831	5.31952	11.8181	0.000586579	0.00294783
ENSMUSG00000005566	21849	Trim28	tripartite motif-containing 28 [Source:MGI Symbol;Acc:MGI:109274]	0.858336	6.83482	18.7606	1.48196e-05	0.000121445	-0.525894	6.83482	7.04708	0.00793945	0.0241363
ENSMUSG00000005687	68183	Bcas2	breast carcinoma amplified sequence 2 [Source:MGI Symbol;Acc:MGI:1915433]	0.631839	5.82635	8.49015	0.00357075	0.0112276	-0.835345	5.82635	14.5403	0.000137195	0.000897571
ENSMUSG00000005804	18457	Bloc1s6	biogenesis of lysosomal organelles complex-1, subunit 6, pallidin [Source:MGI Symbol;Acc:MGI:1927580]	0.972849	5.52354	21.5953	3.36671e-06	3.55198e-05	-0.749417	5.52354	12.6224	0.000381154	0.00206502
ENSMUSG00000005813	75624	Metap1	methionyl aminopeptidase 1 [Source:MGI Symbol;Acc:MGI:1922874]	0.697184	5.36481	13.6954	0.000214975	0.00110892	-0.952325	5.36481	24.6385	6.91575e-07	1.14072e-05
ENSMUSG00000005846	66409	Rsl1d1	ribosomal L1 domain containing 1 [Source:MGI Symbol;Acc:MGI:1913659]	0.680766	6.34771	14.6438	0.000129863	0.00073299	-0.530912	6.34771	8.82284	0.00297484	0.0109125
ENSMUSG00000006021	70394	Kptn	kaptin [Source:MGI Symbol;Acc:MGI:1890380]	0.424354	3.70525	5.02315	0.0250107	0.05422	-0.606961	3.70525	9.61073	0.00193443	0.00769508
ENSMUSG00000006050	24068	Sra1	steroid receptor RNA activator 1 [Source:MGI Symbol;Acc:MGI:1344414]	1.00659	6.61167	26.1461	3.16528e-07	4.84025e-06	-0.403307	6.61167	4.22578	0.0398143	0.0868134
ENSMUSG00000006169	216705	Clint1	clathrin interactor 1 [Source:MGI Symbol;Acc:MGI:2144243]	0.553766	4.91586	8.07195	0.00449558	0.0135368	-0.410272	4.91586	4.33328	0.0373743	0.0827333
ENSMUSG00000006273	11966	Atp6v1b2	ATPase, H+ transporting, lysosomal V1 subunit B2 [Source:MGI Symbol;Acc:MGI:109618]	0.544132	9.66644	4.51104	0.0336768	0.0691382	-1.04154	9.66644	16.2646	5.50846e-05	0.000425435
ENSMUSG00000006288	219022	Ttc5	tetratricopeptide repeat domain 5 [Source:MGI Symbol;Acc:MGI:2683584]	0.65906	5.55289	12.5694	0.000392106	0.00182013	-0.376868	5.55289	4.06217	0.0438542	0.0938454
ENSMUSG00000006392	80509	Med8	mediator complex subunit 8 [Source:MGI Symbol;Acc:MGI:1915269]	0.571659	5.70556	7.42048	0.00644856	0.0181836	-0.534526	5.70556	6.40618	0.0113724	0.0323069
ENSMUSG00000006456	56275	Rbm14	RNA binding motif protein 14 [Source:MGI Symbol;Acc:MGI:1929092]	0.529506	2.93949	5.55275	0.0184517	0.0423835	-0.50071	2.93949	4.59524	0.0320608	0.0734526
ENSMUSG00000006676	71472	Usp19	ubiquitin specific peptidase 19 [Source:MGI Symbol;Acc:MGI:1918722]	0.595641	4.65683	10.4652	0.00121647	0.00460708	-0.696654	4.65683	13.7134	0.000212935	0.00127799
ENSMUSG00000006699	12540	Cdc42	cell division cycle 42 [Source:MGI Symbol;Acc:MGI:106211]	0.514625	9.28559	6.20842	0.0127144	0.0313977	-0.498653	9.28559	5.82442	0.0158052	0.0420845
ENSMUSG00000006732	17299	Mettl1	methyltransferase like 1 [Source:MGI Symbol;Acc:MGI:1339986]	0.466143	3.70851	4.87403	0.0272638	0.0581279	-0.475594	3.70851	4.84415	0.0277401	0.0654855
ENSMUSG00000006906	70527	Stambp	STAM binding protein [Source:MGI Symbol;Acc:MGI:1917777]	0.412325	5.7378	4.52399	0.0334229	0.0686834	-0.592911	5.7378	9.18842	0.00243551	0.00930266
ENSMUSG00000006941	68969	Eif1b	eukaryotic translation initiation factor 1B [Source:MGI Symbol;Acc:MGI:1916219]	0.915819	6.94118	21.1135	4.32863e-06	4.40344e-05	-0.517392	6.94118	6.76286	0.00930743	0.0274251
ENSMUSG00000007050	27756	Lsm2	LSM2 homolog, U6 small nuclear RNA and mRNA degradation associated [Source:MGI Symbol;Acc:MGI:90676]	0.739735	2.87059	7.04428	0.00795188	0.0214942	-1.00444	2.87059	11.9886	0.000535258	0.00273381
ENSMUSG00000007338	18120	Mrpl49	mitochondrial ribosomal protein L49 [Source:MGI Symbol;Acc:MGI:108180]	0.914297	5.3765	17.3868	3.0493e-05	0.000219914	-0.674805	5.3765	9.34901	0.00223106	0.00867763
ENSMUSG00000007411	17169	Mark3	MAP/microtubule affinity regulating kinase 3 [Source:MGI Symbol;Acc:MGI:1341865]	0.630875	6.67985	11.6333	0.000647808	0.00273177	-0.522043	6.67985	7.90929	0.00491817	0.0164118
ENSMUSG00000007589	28113	Tinf2	Terf1 (TRF1)-interacting nuclear factor 2 [Source:MGI Symbol;Acc:MGI:107246]	0.54319	3.15569	5.40939	0.0200288	0.0453724	-0.509959	3.15569	4.47474	0.0343994	0.0775919
ENSMUSG00000007603	224907	Dus3l	dihydrouridine synthase 3-like (S. cerevisiae) [Source:MGI Symbol;Acc:MGI:2147092]	0.498461	4.6657	6.9609	0.008331	0.0222845	-0.516803	4.6657	7.2424	0.00712019	0.0221269
ENSMUSG00000007646	114714	Rad51c	RAD51 paralog C [Source:MGI Symbol;Acc:MGI:2150020]	0.625774	2.14861	5.25067	0.0219384	0.0488993	-0.634534	2.14861	4.91467	0.0266295	0.0635615
ENSMUSG00000007656	59046	Arpp19	cAMP-regulated phosphoprotein 19 [Source:MGI Symbol;Acc:MGI:1891691]	0.725881	8.99386	8.84404	0.00294047	0.00955567	-0.968621	8.99386	15.6016	7.81878e-05	0.000564615
ENSMUSG00000007739	12464	Cct4	chaperonin containing Tcp1, subunit 4 (delta) [Source:MGI Symbol;Acc:MGI:104689]	0.73992	6.61608	17.5093	2.85909e-05	0.000209164	-0.379044	6.61608	4.58193	0.0323108	0.0738942
ENSMUSG00000007777	66050	0610009B22Rik	RIKEN cDNA 0610009B22 gene [Source:MGI Symbol;Acc:MGI:1913300]	0.577674	5.78938	5.18056	0.0228409	0.0504059	-0.690037	5.78938	7.30103	0.0068915	0.021552
ENSMUSG00000008136	14200	Fhl2	four and a half LIM domains 2 [Source:MGI Symbol;Acc:MGI:1338762]	0.918715	5.8789	10.3803	0.0012737	0.00477887	-1.10727	5.8789	14.8122	0.000118763	0.000795946
ENSMUSG00000008301	56698	Phax	phosphorylated adaptor for RNA export [Source:MGI Symbol;Acc:MGI:1891839]	0.66519	6.01189	12.7999	0.000346641	0.00164495	-0.411065	6.01189	4.8482	0.027675	0.0653594
ENSMUSG00000008333	20639	Snrpb2	U2 small nuclear ribonucleoprotein B [Source:MGI Symbol;Acc:MGI:104805]	1.18497	6.40067	23.5468	1.2191e-06	1.50592e-05	-0.526072	6.40067	4.69658	0.0302227	0.0700449
ENSMUSG00000008373	68988	Prpf31	pre-mRNA processing factor 31 [Source:MGI Symbol;Acc:MGI:1916238]	0.878986	5.68028	24.6195	6.98425e-07	9.45607e-06	-0.43924	5.68028	6.08083	0.0136656	0.037476
ENSMUSG00000008384	55942	Sertad1	SERTA domain containing 1 [Source:MGI Symbol;Acc:MGI:1913438]	1.08865	2.77746	11.0713	0.00087673	0.00350337	-0.849258	2.77746	6.34639	0.011762	0.0331833
ENSMUSG00000008450	68051	Nutf2	nuclear transport factor 2 [Source:MGI Symbol;Acc:MGI:1915301]	0.93817	4.52817	21.7877	3.04547e-06	3.27516e-05	-0.587806	4.52817	8.26046	0.0040518	0.014049
ENSMUSG00000008475	67771	Arpc5	actin related protein 2/3 complex, subunit 5 [Source:MGI Symbol;Acc:MGI:1915021]	0.485513	6.61956	4.95723	0.0259818	0.0559133	-1.05139	6.61956	22.6635	1.93004e-06	2.64298e-05
ENSMUSG00000009013	56455	Dynll1	dynein light chain LC8-type 1 [Source:MGI Symbol;Acc:MGI:1861457]	1.30794	8.73189	29.9049	4.53756e-08	9.22638e-07	-0.581761	8.73189	6.06173	0.0138142	0.0377909
ENSMUSG00000009079	14030	Ewsr1	Ewing sarcoma breakpoint region 1 [Source:MGI Symbol;Acc:MGI:99960]	1.00929	6.0705	11.2007	0.000817661	0.00330672	-1.031	6.0705	11.5556	0.000675455	0.00330825
ENSMUSG00000009293	22213	Ube2g2	ubiquitin-conjugating enzyme E2G 2 [Source:MGI Symbol;Acc:MGI:1343188]	0.776073	4.71942	20.5415	5.83522e-06	5.6516e-05	-0.388338	4.71942	4.96647	0.0258433	0.0621358
ENSMUSG00000009549	20813	Srp14	signal recognition particle 14 [Source:MGI Symbol;Acc:MGI:107169]	1.0727	7.67673	22.9023	1.70447e-06	2.01213e-05	-0.563782	7.67673	6.40084	0.0114066	0.0323767
ENSMUSG00000009555	107951	Cdk9	cyclin-dependent kinase 9 (CDC2-related kinase) [Source:MGI Symbol;Acc:MGI:1328368]	0.568577	5.25477	8.46039	0.00362964	0.0113702	-0.495911	5.25477	6.31489	0.0119728	0.033631
ENSMUSG00000009630	19053	Ppp2cb	protein phosphatase 2 (formerly 2A), catalytic subunit, beta isoform [Source:MGI Symbol;Acc:MGI:1321161]	0.960914	6.72132	14.6465	0.000129673	0.000732168	-0.652144	6.72132	6.76612	0.00929046	0.0273994
ENSMUSG00000009907	20479	Vps4b	vacuolar protein sorting 4B [Source:MGI Symbol;Acc:MGI:1100499]	0.395617	5.36065	4.79406	0.028558	0.0603426	-0.790697	5.36065	18.5281	1.6742e-05	0.000158313
ENSMUSG00000010054	80385	Tusc2	tumor suppressor candidate 2 [Source:MGI Symbol;Acc:MGI:1931086]	0.893201	5.87544	12.1831	0.000482238	0.00215319	-0.595446	5.87544	5.40019	0.0201346	0.0509592
ENSMUSG00000010086	22671	Rnf112	ring finger protein 112 [Source:MGI Symbol;Acc:MGI:106611]	0.509618	6.084	6.40774	0.0113624	0.0286968	-0.658853	6.084	10.546	0.00116439	0.00516602
ENSMUSG00000010914	27402	Pdhx	pyruvate dehydrogenase complex, component X [Source:MGI Symbol;Acc:MGI:1351627]	0.594817	6.17341	13.3005	0.000265334	0.00132267	-0.415315	6.17341	6.40798	0.0113609	0.0322795
ENSMUSG00000011114	21376	Tbrg1	transforming growth factor beta regulated gene 1 [Source:MGI Symbol;Acc:MGI:1100877]	0.757622	6.01084	18.8157	1.43976e-05	0.000118684	-0.471189	6.01084	7.20497	0.0072702	0.0224669
ENSMUSG00000011306	70616	Sugp1	SURP and G patch domain containing 1 [Source:MGI Symbol;Acc:MGI:1917866]	0.462197	4.69638	3.92582	0.04755	0.0915578	-0.647302	4.69638	7.51182	0.00612954	0.0196792
ENSMUSG00000011752	18648	Pgam1	phosphoglycerate mutase 1 [Source:MGI Symbol;Acc:MGI:97552]	1.24486	3.31469	21.4856	3.56493e-06	3.74167e-05	-0.79962	3.31469	8.37446	0.0038053	0.0133189
ENSMUSG00000012483	68240	Rpa3	replication protein A3 [Source:MGI Symbol;Acc:MGI:1915490]	0.725175	3.62844	7.07879	0.00780015	0.021142	-0.622321	3.62844	5.02054	0.0250484	0.0606943
ENSMUSG00000013089	104156	Etv5	ets variant 5 [Source:MGI Symbol;Acc:MGI:1096867]	0.484747	6.13199	7.17567	0.00738987	0.0202326	-0.565415	6.13199	9.6217	0.00192292	0.00766199
ENSMUSG00000013160	11972	Atp6v0d1	ATPase, H+ transporting, lysosomal V0 subunit D1 [Source:MGI Symbol;Acc:MGI:1201778]	0.980663	8.77849	17.4999	2.87326e-05	0.000209834	-0.4999	8.77849	4.6028	0.0319199	0.0731658
ENSMUSG00000013921	76686	Clip3	CAP-GLY domain containing linker protein 3 [Source:MGI Symbol;Acc:MGI:1923936]	0.715224	8.6169	11.8922	0.00056371	0.0024441	-0.772609	8.6169	13.8218	0.000200993	0.00121633
ENSMUSG00000013997	27045	Nit1	nitrilase 1 [Source:MGI Symbol;Acc:MGI:1350916]	0.371877	4.68988	4.29669	0.0381865	0.0766059	-0.550706	4.68988	9.10766	0.00254542	0.00962055
ENSMUSG00000014075	66061	Tctex1d2	Tctex1 domain containing 2 [Source:MGI Symbol;Acc:MGI:1913311]	0.827397	4.60224	7.79333	0.00524395	0.0153387	-0.802778	4.60224	7.20115	0.00728569	0.0225028
ENSMUSG00000014077	56398	Chp1	calcineurin-like EF hand protein 1 [Source:MGI Symbol;Acc:MGI:1927185]	0.694917	7.40162	12.306	0.000451493	0.0020409	-0.54333	7.40162	7.51132	0.00613124	0.0196792
ENSMUSG00000014195	56354	Dnajc7	DnaJ heat shock protein family (Hsp40) member C7 [Source:MGI Symbol;Acc:MGI:1928373]	0.538021	6.84354	10.0896	0.00149112	0.00544482	-0.534894	6.84354	9.88025	0.00167062	0.00684362
ENSMUSG00000014226	12301	Cacybp	calcyclin binding protein [Source:MGI Symbol;Acc:MGI:1270839]	1.17578	6.62954	32.48	1.20425e-08	2.91506e-07	-0.733615	6.62954	12.6922	0.000367179	0.0020096
ENSMUSG00000014232	76779	Cluap1	clusterin associated protein 1 [Source:MGI Symbol;Acc:MGI:1924029]	0.451014	4.4825	6.03008	0.0140641	0.0340685	-0.391625	4.4825	4.39329	0.0360807	0.0804003
ENSMUSG00000014243	69747	Zswim7	zinc finger SWIM-type containing 7 [Source:MGI Symbol;Acc:MGI:1916997]	1.21658	4.42502	22.4346	2.17424e-06	2.47441e-05	-0.553311	4.42502	4.58598	0.0322346	0.0737839
ENSMUSG00000014349	268470	Ube2z	ubiquitin-conjugating enzyme E2Z [Source:MGI Symbol;Acc:MGI:1343160]	0.535021	5.81764	6.32702	0.0118912	0.0297902	-0.56226	5.81764	6.89396	0.00864876	0.0258891
ENSMUSG00000014402	22088	Tsg101	tumor susceptibility gene 101 [Source:MGI Symbol;Acc:MGI:106581]	0.752377	5.96459	14.8892	0.000114015	0.000657476	-0.584562	5.96459	8.88819	0.00287021	0.0106029
ENSMUSG00000014606	67863	Slc25a11	solute carrier family 25 (mitochondrial carrier oxoglutarate carrier), member 11 [Source:MGI Symbol;Acc:MGI:1915113]	0.700697	7.01602	11.609	0.000656318	0.00276072	-0.701934	7.01602	11.5696	0.000670388	0.00329016
ENSMUSG00000014633	66531	Cmc2	COX assembly mitochondrial protein 2 [Source:MGI Symbol;Acc:MGI:1913781]	1.07316	4.14399	25.0676	5.53542e-07	7.83601e-06	-0.601408	4.14399	7.57312	0.00592452	0.0191713
ENSMUSG00000014873	20931	Surf2	surfeit gene 2 [Source:MGI Symbol;Acc:MGI:98444]	0.676702	4.92002	7.55612	0.00598066	0.0170941	-0.998993	4.92002	15.9293	6.57514e-05	0.000489995
ENSMUSG00000014959	70231	Gorasp2	golgi reassembly stacking protein 2 [Source:MGI Symbol;Acc:MGI:2135962]	0.672892	6.45419	12.0414	0.000520312	0.00228368	-0.453291	6.45419	5.43993	0.0196815	0.0500617
ENSMUSG00000015247	66536	Nipsnap3b	nipsnap homolog 3B (C. elegans) [Source:MGI Symbol;Acc:MGI:1913786]	0.423873	3.95257	4.29821	0.0381525	0.0765744	-0.412502	3.95257	3.9011	0.0482546	0.10168
ENSMUSG00000015289	66192	Lage3	L antigen family, member 3 [Source:MGI Symbol;Acc:MGI:1913442]	0.481335	5.06073	4.89984	0.0268592	0.0574478	-0.483136	5.06073	4.84925	0.0276581	0.0653379
ENSMUSG00000015357	270166	Clpx	caseinolytic mitochondrial matrix peptidase chaperone subunit [Source:MGI Symbol;Acc:MGI:1346017]	0.576738	5.00188	7.88505	0.0049845	0.0147521	-0.482743	5.00188	5.40916	0.0200314	0.05079
ENSMUSG00000015672	NA	Mrpl32	mitochondrial ribosomal protein L32 [Source:MGI Symbol;Acc:MGI:2137226]	1.01136	5.35054	15.4425	8.50532e-05	0.000515637	-0.551567	5.35054	4.58458	0.0322609	0.0738061
ENSMUSG00000015711	229589	Prune1	prune exopolyphosphatase [Source:MGI Symbol;Acc:MGI:1925152]	0.389953	5.11505	5.1365	0.0234279	0.0514133	-0.705999	5.11505	16.2383	5.58538e-05	0.000430385
ENSMUSG00000015837	18412	Sqstm1	sequestosome 1 [Source:MGI Symbol;Acc:MGI:107931]	1.07697	8.86083	17.0027	3.73273e-05	0.000260144	-0.659405	8.86083	6.45409	0.0110697	0.0315861
ENSMUSG00000015971	56249	Actr8	ARP8 actin-related protein 8 [Source:MGI Symbol;Acc:MGI:1860775]	0.554628	5.34001	9.77145	0.00177243	0.00627449	-0.640542	5.34001	12.6827	0.000369058	0.00201528
ENSMUSG00000016308	22209	Ube2a	ubiquitin-conjugating enzyme E2A [Source:MGI Symbol;Acc:MGI:102959]	1.04109	5.77063	24.882	6.09485e-07	8.54144e-06	-0.568602	5.77063	7.39288	0.00654826	0.0206907
ENSMUSG00000016386	77015	Mpped2	metallophosphoesterase domain containing 2 [Source:MGI Symbol;Acc:MGI:1924265]	0.781843	5.47077	11.3757	0.000744125	0.00306249	-0.82911	5.47077	12.5522	0.000395738	0.00213114
ENSMUSG00000016526	226419	Dyrk3	dual-specificity tyrosine-(Y)-phosphorylation regulated kinase 3 [Source:MGI Symbol;Acc:MGI:1330300]	1.12614	3.09781	12.9566	0.000318803	0.00153808	-1.04287	3.09781	10.411	0.00125267	0.00545632
ENSMUSG00000017288	68299	Vps53	VPS53 GARP complex subunit [Source:MGI Symbol;Acc:MGI:1915549]	0.584236	5.93806	11.2619	0.000791128	0.00322134	-0.412659	5.93806	5.5511	0.0184691	0.0476785
ENSMUSG00000017299	76233	Dnttip1	deoxynucleotidyltransferase, terminal, interacting protein 1 [Source:MGI Symbol;Acc:MGI:1923483]	0.745787	3.71562	11.9809	0.000537487	0.00234862	-0.689848	3.71562	9.66182	0.00188137	0.00752862
ENSMUSG00000017314	50997	Mpp2	membrane protein, palmitoylated 2 (MAGUK p55 subfamily member 2) [Source:MGI Symbol;Acc:MGI:1858257]	0.443914	6.17132	7.27317	0.0069992	0.0194087	-0.341253	6.17132	4.24756	0.0393068	0.0859789
ENSMUSG00000017485	21974	Top2b	topoisomerase (DNA) II beta [Source:MGI Symbol;Acc:MGI:98791]	0.624699	6.63726	11.2424	0.000799496	0.00324421	-0.534877	6.63726	8.18163	0.00423166	0.0145852
ENSMUSG00000017679	76080	Ttpal	tocopherol (alpha) transfer protein-like [Source:MGI Symbol;Acc:MGI:1923330]	0.502874	5.92865	8.07438	0.00448954	0.0135293	-0.591115	5.92865	10.9567	0.00093265	0.00430095
ENSMUSG00000017781	18738	Pitpna	phosphatidylinositol transfer protein, alpha [Source:MGI Symbol;Acc:MGI:99887]	0.683825	8.2162	11.1165	0.000855621	0.00343243	-0.745504	8.2162	13.1486	0.000287737	0.00164696
ENSMUSG00000017801	21428	Mlx	MAX-like protein X [Source:MGI Symbol;Acc:MGI:108398]	0.93528	5.32788	16.8568	4.03076e-05	0.000277001	-0.805282	5.32788	12.2929	0.00045469	0.00238955
ENSMUSG00000017831	271457	Rab5a	RAB5A, member RAS oncogene family [Source:MGI Symbol;Acc:MGI:105926]	0.616829	5.67865	6.63508	0.00999895	0.0258288	-1.05996	5.67865	19.0324	1.28521e-05	0.000127344
ENSMUSG00000017943	228858	Gdap1l1	ganglioside-induced differentiation-associated protein 1-like 1 [Source:MGI Symbol;Acc:MGI:2385163]	1.01604	6.31223	25.6014	4.19736e-07	6.20358e-06	-0.561287	6.31223	7.8109	0.0051932	0.0171488
ENSMUSG00000017978	320405	Cadps2	Ca2+-dependent activator protein for secretion 2 [Source:MGI Symbol;Acc:MGI:2443963]	0.470269	7.23212	4.79032	0.0286202	0.0604436	-0.688897	7.23212	10.1743	0.0014241	0.0060224
ENSMUSG00000017999	228889	Ddx27	DEAD (Asp-Glu-Ala-Asp) box polypeptide 27 [Source:MGI Symbol;Acc:MGI:2385884]	0.672847	4.09801	11.9031	0.000560392	0.00243223	-0.395611	4.09801	3.94298	0.0470674	0.0996947
ENSMUSG00000018012	170758	Rac3	RAS-related C3 botulinum substrate 3 [Source:MGI Symbol;Acc:MGI:2180784]	1.17313	1.86298	15.9518	6.49766e-05	0.000414915	-0.636419	1.86298	4.11403	0.0425288	0.0915443
ENSMUSG00000018239	67966	Zcchc10	zinc finger, CCHC domain containing 10 [Source:MGI Symbol;Acc:MGI:1196228]	0.740029	3.83925	7.55403	0.00598761	0.0171082	-1.26162	3.83925	20.53	5.87036e-06	6.6358e-05
ENSMUSG00000018287	216873	Spag7	sperm associated antigen 7 [Source:MGI Symbol;Acc:MGI:107380]	0.781876	6.18674	14.7066	0.000125609	0.000713215	-0.41843	6.18674	4.20353	0.04034	0.0877127
ENSMUSG00000018293	18643	Pfn1	profilin 1 [Source:MGI Symbol;Acc:MGI:97549]	1.10823	6.51241	18.9734	1.32555e-05	0.000111236	-0.570508	6.51241	5.07828	0.0242274	0.0590377
ENSMUSG00000018322	67145	Tomm34	translocase of outer mitochondrial membrane 34 [Source:MGI Symbol;Acc:MGI:1914395]	0.580225	7.05299	7.78626	0.00526449	0.0153908	-0.675132	7.05299	10.4574	0.00122162	0.00535338
ENSMUSG00000018395	16568	Kif3a	kinesin family member 3A [Source:MGI Symbol;Acc:MGI:107689]	0.447064	7.76212	4.98092	0.0256283	0.0552946	-0.768139	7.76212	14.5389	0.000137298	0.000897571
ENSMUSG00000018405	217038	Mrm1	mitochondrial rRNA methyltransferase 1 [Source:MGI Symbol;Acc:MGI:2443470]	0.902763	3.16992	13.5261	0.000235272	0.00119669	-0.521054	3.16992	4.23913	0.0395023	0.0862939
ENSMUSG00000018451	NA	6330403K07Rik	RIKEN cDNA 6330403K07 gene [Source:MGI Symbol;Acc:MGI:1918001]	1.16972	7.16233	25.4192	4.61312e-07	6.72914e-06	-0.881857	7.16233	14.5078	0.000139583	0.000908966
ENSMUSG00000018509	73139	Cenpv	centromere protein V [Source:MGI Symbol;Acc:MGI:1920389]	0.647313	4.04873	7.10795	0.0076743	0.0208514	-0.591129	4.04873	5.74237	0.0165605	0.0437334
ENSMUSG00000018648	56405	Dusp14	dual specificity phosphatase 14 [Source:MGI Symbol;Acc:MGI:1927168]	0.924872	6.43802	13.5698	0.000229856	0.0011734	-0.920734	6.43802	13.3411	0.000259658	0.00151032
ENSMUSG00000018659	103711	Pnpo	pyridoxine 5'-phosphate oxidase [Source:MGI Symbol;Acc:MGI:2144151]	0.805225	6.30185	14.1268	0.00017089	0.000919694	-0.782086	6.30185	13.1962	0.000280521	0.00161211
ENSMUSG00000018736	83431	Ndel1	nudE neurodevelopment protein 1 like 1 [Source:MGI Symbol;Acc:MGI:1932915]	0.645283	5.1383	11.1424	0.000843756	0.00339425	-0.772849	5.1383	15.4614	8.42068e-05	0.000599433
ENSMUSG00000018848	104458	Rars	arginyl-tRNA synthetase [Source:MGI Symbol;Acc:MGI:1914297]	0.522839	5.90098	7.87161	0.00502168	0.0148255	-0.385851	5.90098	4.24312	0.0394098	0.0861479
ENSMUSG00000018882	67036	Mrpl45	mitochondrial ribosomal protein L45 [Source:MGI Symbol;Acc:MGI:1914286]	0.424446	5.83473	5.60716	0.0178872	0.0413075	-0.42878	5.83473	5.63769	0.0175784	0.0459168
ENSMUSG00000018965	22629	Ywhah	tyrosine 3-monooxygenase/tryptophan 5-monooxygenase activation protein, eta polypeptide [Source:MGI Symbol;Acc:MGI:109194]	0.94101	8.43282	12.9887	0.000313384	0.00151729	-1.11915	8.43282	18.203	1.98568e-05	0.000183021
ENSMUSG00000019235	238323	Rps6kl1	ribosomal protein S6 kinase-like 1 [Source:MGI Symbol;Acc:MGI:2443413]	0.58536	4.32847	6.61461	0.0101146	0.0260632	-0.556347	4.32847	5.80514	0.0159794	0.0424809
ENSMUSG00000019428	14232	Fkbp8	FK506 binding protein 8 [Source:MGI Symbol;Acc:MGI:1341070]	1.35037	6.77904	37.4947	9.1661e-10	3.37809e-08	-0.445751	6.77904	4.17237	0.0410882	0.0889476
ENSMUSG00000019777	15182	Hdac2	histone deacetylase 2 [Source:MGI Symbol;Acc:MGI:1097691]	0.422025	6.02906	5.67907	0.0171684	0.0399059	-0.820086	6.02906	20.8805	4.88856e-06	5.73381e-05
ENSMUSG00000019785	215890	Clvs2	clavesin 2 [Source:MGI Symbol;Acc:MGI:2443223]	0.755691	5.48994	11.0195	0.00090156	0.00358466	-0.969135	5.48994	17.6767	2.61818e-05	0.000231036
ENSMUSG00000019804	54198	Snx3	sorting nexin 3 [Source:MGI Symbol;Acc:MGI:1860188]	0.7356	7.52464	10.4098	0.00125348	0.00471249	-0.51369	7.52464	5.08622	0.0241168	0.0588107
ENSMUSG00000019814	353258	Ltv1	LTV1 ribosome biogenesis factor [Source:MGI Symbol;Acc:MGI:2447810]	0.542169	3.70036	4.74992	0.0292996	0.0616422	-0.749881	3.70036	8.6399	0.0032888	0.0118314
ENSMUSG00000019831	83767	Wasf1	WAS protein family, member 1 [Source:MGI Symbol;Acc:MGI:1890563]	0.546638	8.75947	6.12819	0.0133043	0.0325667	-1.04375	8.75947	21.9615	2.78178e-06	3.59232e-05
ENSMUSG00000019849	19072	Prep	prolyl endopeptidase [Source:MGI Symbol;Acc:MGI:1270863]	0.824852	3.7574	18.8312	1.42814e-05	0.000117957	-0.565909	3.7574	8.28606	0.00399506	0.0138715
ENSMUSG00000019876	18768	Pkib	protein kinase inhibitor beta, cAMP dependent, testis specific [Source:MGI Symbol;Acc:MGI:101937]	0.846049	3.6026	8.98461	0.00272263	0.00897996	-0.609757	3.6026	4.52541	0.0333951	0.0757236
ENSMUSG00000019897	52713	Ccdc59	coiled-coil domain containing 59 [Source:MGI Symbol;Acc:MGI:1289302]	0.724282	4.9018	12.0005	0.000531865	0.00232648	-0.844498	4.9018	15.7426	7.25706e-05	0.000529753
ENSMUSG00000019923	52696	Zwint	ZW10 interactor [Source:MGI Symbol;Acc:MGI:1289227]	0.798119	10.5543	8.94155	0.00278756	0.00915272	-0.898417	10.5543	11.2885	0.000779896	0.00373367
ENSMUSG00000019927	216080	Ube2d1	ubiquitin-conjugating enzyme E2D 1 [Source:MGI Symbol;Acc:MGI:2384911]	0.723575	5.6678	11.2746	0.000785766	0.00320555	-1.10056	5.6678	25.2675	4.99036e-07	8.67496e-06
ENSMUSG00000019960	67603	Dusp6	dual specificity phosphatase 6 [Source:MGI Symbol;Acc:MGI:1914853]	0.601614	6.40276	5.20153	0.022567	0.0499766	-0.997152	6.40276	14.0229	0.000180597	0.00112204
ENSMUSG00000019998	53331	Stx7	syntaxin 7 [Source:MGI Symbol;Acc:MGI:1858210]	0.678295	7.13842	11.2847	0.000781495	0.00319201	-0.719362	7.13842	12.5935	0.0003871	0.00209268
ENSMUSG00000020032	77976	Nuak1	NUAK family, SNF1-like kinase, 1 [Source:MGI Symbol;Acc:MGI:1925226]	0.565879	5.46663	9.72034	0.00182239	0.00641298	-0.500245	5.46663	7.4225	0.00644134	0.020426
ENSMUSG00000020076	94213	Ddx50	DEAD (Asp-Glu-Ala-Asp) box polypeptide 50 [Source:MGI Symbol;Acc:MGI:2182303]	0.368427	4.92997	4.29704	0.0381789	0.0765997	-0.490582	4.92997	7.40933	0.00648866	0.0205566
ENSMUSG00000020083	69894	2010107G23Rik	RIKEN cDNA 2010107G23 gene [Source:MGI Symbol;Acc:MGI:1917144]	1.00322	4.31381	12.5067	0.000405493	0.00187181	-1.02371	4.31381	12.6205	0.000381535	0.00206593
ENSMUSG00000020089	67895	Ppa1	pyrophosphatase (inorganic) 1 [Source:MGI Symbol;Acc:MGI:97831]	1.06878	6.63883	31.8611	1.65603e-08	3.86368e-07	-0.509905	6.63883	7.2922	0.00692544	0.0216299
ENSMUSG00000020116	66249	Pno1	partner of NOB1 homolog [Source:MGI Symbol;Acc:MGI:1913499]	1.12867	4.78211	18.3972	1.79317e-05	0.000141422	-0.772231	4.78211	8.48081	0.00358913	0.012702
ENSMUSG00000020149	19324	Rab1a	RAB1A, member RAS oncogene family [Source:MGI Symbol;Acc:MGI:97842]	0.738652	8.01204	15.4065	8.66918e-05	0.000523302	-0.605465	8.01204	10.3465	0.0012972	0.00561129
ENSMUSG00000020173	12808	Cobl	cordon-bleu WH2 repeat [Source:MGI Symbol;Acc:MGI:105056]	0.881507	5.96787	11.4541	0.000713356	0.00295762	-0.891821	5.96787	11.5997	0.000659609	0.0032458
ENSMUSG00000020180	NA	Snrpd3	small nuclear ribonucleoprotein D3 [Source:MGI Symbol;Acc:MGI:1914582]	0.778452	6.873	18.8986	1.37853e-05	0.000114934	-0.401029	6.873	5.01568	0.0251188	0.0607946
ENSMUSG00000020198	11776	Ap3d1	adaptor-related protein complex 3, delta 1 subunit [Source:MGI Symbol;Acc:MGI:107734]	0.436763	7.52399	4.77183	0.0289291	0.0609886	-0.521528	7.52399	6.76443	0.00929924	0.0274156
ENSMUSG00000020211	20222	Sf3a2	splicing factor 3a, subunit 2 [Source:MGI Symbol;Acc:MGI:104912]	1.16319	1.68286	17.7425	2.52914e-05	0.000188981	-0.594535	1.68286	3.94178	0.0471008	0.0997244
ENSMUSG00000020268	75530	Lyrm7	LYR motif containing 7 [Source:MGI Symbol;Acc:MGI:1922780]	0.695503	4.32765	6.35448	0.0117085	0.0294336	-0.906845	4.32765	10.4548	0.00122333	0.00535946
ENSMUSG00000020277	18641	Pfkl	phosphofructokinase, liver, B-type [Source:MGI Symbol;Acc:MGI:97547]	0.828983	5.70414	17.5408	2.81213e-05	0.000206088	-0.493605	5.70414	6.16171	0.0130545	0.0360917
ENSMUSG00000020309	68044	Chac2	ChaC, cation transport regulator 2 [Source:MGI Symbol;Acc:MGI:1915294]	0.653734	4.2425	5.46551	0.0193954	0.0441342	-0.781214	4.2425	7.58637	0.00588112	0.0190492
ENSMUSG00000020328	52653	Nudcd2	NudC domain containing 2 [Source:MGI Symbol;Acc:MGI:1277103]	0.586918	4.11667	4.47563	0.0343815	0.0702809	-0.733134	4.11667	6.76256	0.00930899	0.0274251
ENSMUSG00000020349	19052	Ppp2ca	protein phosphatase 2 (formerly 2A), catalytic subunit, alpha isoform [Source:MGI Symbol;Acc:MGI:1321159]	0.814821	9.00311	11.1937	0.000820763	0.00331766	-0.847978	9.00311	12.093	0.000506128	0.00260762
ENSMUSG00000020390	22210	Ube2b	ubiquitin-conjugating enzyme E2B [Source:MGI Symbol;Acc:MGI:102944]	0.956408	7.53142	17.6978	2.5892e-05	0.000192185	-0.919076	7.53142	16.2834	5.45392e-05	0.000421805
ENSMUSG00000020392	52626	Cdkn2aipnl	CDKN2A interacting protein N-terminal like [Source:MGI Symbol;Acc:MGI:1261797]	0.817778	5.0813	21.1853	4.16957e-06	4.27534e-05	-0.616978	5.0813	11.7047	0.000623417	0.00309861
ENSMUSG00000020400	57783	Tnip1	TNFAIP3 interacting protein 1 [Source:MGI Symbol;Acc:MGI:1926194]	0.524305	4.06892	8.05301	0.0045428	0.013651	-0.37061	4.06892	3.85802	0.0495087	0.103723
ENSMUSG00000020448	193670	Rnf185	ring finger protein 185 [Source:MGI Symbol;Acc:MGI:1922078]	0.408987	5.07778	4.70064	0.0301514	0.0630896	-0.60865	5.07778	10.1291	0.00145944	0.00613278
ENSMUSG00000020457	13494	Drg1	developmentally regulated GTP binding protein 1 [Source:MGI Symbol;Acc:MGI:1343297]	0.820362	7.10286	22.4349	2.17384e-06	2.47441e-05	-0.391186	7.10286	5.11215	0.0237588	0.0581387
ENSMUSG00000020462	216618	Cfap36	cilia and flagella associated protein 36 [Source:MGI Symbol;Acc:MGI:1913994]	0.998365	6.76362	22.0266	2.68893e-06	2.95588e-05	-0.449005	6.76362	4.48575	0.0341786	0.0772182
ENSMUSG00000020476	13169	Dbnl	drebrin-like [Source:MGI Symbol;Acc:MGI:700006]	0.716016	5.51431	12.1206	0.000498688	0.002209	-0.686366	5.51431	10.9343	0.000944014	0.00433858
ENSMUSG00000020526	448850	Znhit3	zinc finger, HIT type 3 [Source:MGI Symbol;Acc:MGI:3051596]	0.849392	5.86514	9.76923	0.00177457	0.00627893	-0.935688	5.86514	11.6997	0.000625116	0.00310338
ENSMUSG00000020528	212627	Prpsap2	phosphoribosyl pyrophosphate synthetase-associated protein 2 [Source:MGI Symbol;Acc:MGI:2384838]	0.497929	3.43646	5.76558	0.0163431	0.0383381	-0.591922	3.43646	7.62306	0.00576268	0.0187198
ENSMUSG00000020530	217039	Ggnbp2	gametogenetin binding protein 2 [Source:MGI Symbol;Acc:MGI:2387356]	0.358298	7.39184	4.27279	0.0387273	0.0774961	-0.570495	7.39184	10.7286	0.00105492	0.00475834
ENSMUSG00000020612	19084	Prkar1a	protein kinase, cAMP dependent regulatory, type I, alpha [Source:MGI Symbol;Acc:MGI:104878]	0.648178	9.31184	9.4398	0.00212326	0.00730236	-0.553982	9.31184	6.90295	0.00860534	0.0257822
ENSMUSG00000020638	22169	Cmpk2	cytidine monophosphate (UMP-CMP) kinase 2, mitochondrial [Source:MGI Symbol;Acc:MGI:99830]	0.68926	4.95881	10.093	0.00148835	0.0054359	-0.743075	4.95881	11.4096	0.000730667	0.0035343
ENSMUSG00000020656	195733	Grhl1	grainyhead-like 1 (Drosophila) [Source:MGI Symbol;Acc:MGI:2182540]	0.589167	3.00444	4.36609	0.036661	0.0741038	-0.948747	3.00444	10.5637	0.00115331	0.00512903
ENSMUSG00000020668	16570	Kif3c	kinesin family member 3C [Source:MGI Symbol;Acc:MGI:107979]	0.573409	7.12807	8.84858	0.00293317	0.00954119	-0.89218	7.12807	21.0701	4.42779e-06	5.29504e-05
ENSMUSG00000020669	24057	Sh3yl1	Sh3 domain YSC-like 1 [Source:MGI Symbol;Acc:MGI:1346118]	1.15263	2.83005	14.4264	0.000145749	0.000808509	-0.844446	2.83005	7.22269	0.00719877	0.0223142
ENSMUSG00000020720	66997	Psmd12	proteasome (prosome, macropain) 26S subunit, non-ATPase, 12 [Source:MGI Symbol;Acc:MGI:1914247]	1.03121	6.51935	29.6117	5.2785e-08	1.04391e-06	-0.575482	6.51935	9.23311	0.00237677	0.00911739
ENSMUSG00000020775	60441	Mrpl38	mitochondrial ribosomal protein L38 [Source:MGI Symbol;Acc:MGI:1926269]	1.05222	4.31115	20.6257	5.58417e-06	5.46525e-05	-0.536048	4.31115	5.21817	0.0223521	0.0553676
ENSMUSG00000020780	217337	Srp68	signal recognition particle 68 [Source:MGI Symbol;Acc:MGI:1917447]	0.700289	5.90129	14.684	0.000127123	0.000720388	-0.439831	5.90129	5.73386	0.0166408	0.0438774
ENSMUSG00000020801	67279	Med31	mediator complex subunit 31 [Source:MGI Symbol;Acc:MGI:1914529]	0.852141	4.79606	12.1583	0.00048869	0.00217448	-0.633506	4.79606	6.60494	0.0101696	0.0294485
ENSMUSG00000020802	217342	Ube2o	ubiquitin-conjugating enzyme E2O [Source:MGI Symbol;Acc:MGI:2444266]	0.53261	4.68887	6.36227	0.0116572	0.0293398	-0.56675	4.68887	6.99997	0.00815113	0.0246592
ENSMUSG00000020827	50932	Mink1	misshapen-like kinase 1 (zebrafish) [Source:MGI Symbol;Acc:MGI:1355329]	0.528463	4.80975	7.89306	0.00496249	0.0147051	-0.58389	4.80975	9.26203	0.00233953	0.00901405
ENSMUSG00000020882	12295	Cacnb1	calcium channel, voltage-dependent, beta 1 subunit [Source:MGI Symbol;Acc:MGI:102522]	1.13199	4.6627	30.0963	4.11109e-08	8.52453e-07	-0.497303	4.6627	5.69417	0.0170213	0.0447053
ENSMUSG00000020904	71860	Cfap52	cilia and flagella associated protein 52 [Source:MGI Symbol;Acc:MGI:1919110]	0.912599	0.961086	8.39091	0.00377102	0.0117385	-0.899892	0.961086	6.60709	0.0101574	0.0294232
ENSMUSG00000020918	14534	Kat2a	K(lysine) acetyltransferase 2A [Source:MGI Symbol;Acc:MGI:1343101]	0.646028	5.37812	12.4039	0.000428431	0.00195563	-0.561018	5.37812	9.15351	0.00248242	0.0094449
ENSMUSG00000020936	18107	Nmt1	N-myristoyltransferase 1 [Source:MGI Symbol;Acc:MGI:102579]	0.51073	7.28258	8.48772	0.00357551	0.0112384	-0.385635	7.28258	4.82167	0.0281041	0.0660937
ENSMUSG00000020949	30795	Fkbp3	FK506 binding protein 3 [Source:MGI Symbol;Acc:MGI:1353460]	1.19595	7.48864	27.1722	1.86116e-07	3.07596e-06	-0.585251	7.48864	6.61089	0.0101357	0.0293798
ENSMUSG00000020973	109065	Dnaaf2	dynein, axonemal assembly factor 2 [Source:MGI Symbol;Acc:MGI:1923566]	0.672156	2.44716	5.95696	0.0146593	0.0351783	-0.672103	2.44716	5.46081	0.0194476	0.0495947
ENSMUSG00000020978	69554	Klhdc2	kelch domain containing 2 [Source:MGI Symbol;Acc:MGI:1916804]	0.728822	6.89877	14.8623	0.00011565	0.000664391	-0.751501	6.89877	15.6483	7.62816e-05	0.000552753
ENSMUSG00000020993	78232	Trappc6b	trafficking protein particle complex 6B [Source:MGI Symbol;Acc:MGI:1925482]	0.536636	5.58539	5.12817	0.0235405	0.0516267	-0.895121	5.58539	13.9296	0.000189783	0.00116531
ENSMUSG00000021018	245841	Polr2h	polymerase (RNA) II (DNA directed) polypeptide H [Source:MGI Symbol;Acc:MGI:2384309]	1.2117	5.50748	24.2772	8.34199e-07	1.09583e-05	-0.655025	5.50748	7.10906	0.00766954	0.0234903
ENSMUSG00000021022	59032	Ppp2r3c	protein phosphatase 2, regulatory subunit B'', gamma [Source:MGI Symbol;Acc:MGI:1930009]	0.681662	4.20024	9.92666	0.00162902	0.00585282	-0.5573	4.20024	6.38231	0.0115263	0.0326502
ENSMUSG00000021071	94090	Trim9	tripartite motif-containing 9 [Source:MGI Symbol;Acc:MGI:2137354]	0.422703	8.18848	4.74253	0.0294257	0.0618335	-0.473742	8.18848	5.93587	0.0148358	0.0400627
ENSMUSG00000021079	30056	Timm9	translocase of inner mitochondrial membrane 9 [Source:MGI Symbol;Acc:MGI:1353436]	0.590182	5.0161	6.40536	0.0113776	0.0287309	-0.840137	5.0161	12.6444	0.000376684	0.00204617
ENSMUSG00000021103	17420	Mnat1	menage a trois 1 [Source:MGI Symbol;Acc:MGI:106207]	0.657206	4.46241	8.22244	0.00413756	0.0126841	-0.54281	4.46241	5.46191	0.0194354	0.049586
ENSMUSG00000021116	13665	Eif2s1	eukaryotic translation initiation factor 2, subunit 1 alpha [Source:MGI Symbol;Acc:MGI:95299]	0.672043	5.28829	10.8137	0.00100754	0.00393628	-0.443052	5.28829	4.63153	0.0313895	0.0722007
ENSMUSG00000021149	69237	Gtpbp4	GTP binding protein 4 [Source:MGI Symbol;Acc:MGI:1916487]	0.656758	6.05461	15.4839	8.32118e-05	0.000505753	-0.411892	6.05461	6.01868	0.0141552	0.0385415
ENSMUSG00000021196	56421	Pfkp	phosphofructokinase, platelet [Source:MGI Symbol;Acc:MGI:1891833]	0.436385	8.23529	4.82997	0.0279691	0.0593106	-0.61918	8.23529	9.663	0.00188016	0.00752558
ENSMUSG00000021215	56349	Net1	neuroepithelial cell transforming gene 1 [Source:MGI Symbol;Acc:MGI:1927138]	1.10667	3.97342	21.0209	4.54302e-06	4.58928e-05	-0.794289	3.97342	10.3564	0.00129027	0.00558705
ENSMUSG00000021222	73828	Dcaf4	DDB1 and CUL4 associated factor 4 [Source:MGI Symbol;Acc:MGI:1921078]	0.836176	3.76688	17.016	3.70666e-05	0.000258709	-0.434649	3.76688	4.37321	0.0365082	0.0812235
ENSMUSG00000021276	67236	Cinp	cyclin-dependent kinase 2 interacting protein [Source:MGI Symbol;Acc:MGI:1914486]	0.99446	6.8937	26.4382	2.72099e-07	4.26187e-06	-0.43456	6.8937	5.08154	0.0241819	0.0589438
ENSMUSG00000021326	19720	Trim27	tripartite motif-containing 27 [Source:MGI Symbol;Acc:MGI:97904]	0.694873	4.63013	7.28598	0.0069495	0.0192978	-0.733587	4.63013	7.91948	0.00489054	0.0163489
ENSMUSG00000021373	67252	Cap2	CAP, adenylate cyclase-associated protein, 2 (yeast) [Source:MGI Symbol;Acc:MGI:1914502]	1.01253	7.61743	19.8151	8.53079e-06	7.74372e-05	-0.615206	7.61743	7.37709	0.006606	0.0208378
ENSMUSG00000021385	75678	Ippk	inositol 1,3,4,5,6-pentakisphosphate 2-kinase [Source:MGI Symbol;Acc:MGI:1922928]	0.460581	3.98688	6.38823	0.0114879	0.0289659	-0.820818	3.98688	18.9241	1.36026e-05	0.000133832
ENSMUSG00000021392	70930	Nol8	nucleolar protein 8 [Source:MGI Symbol;Acc:MGI:1918180]	1.39223	5.58844	52.8914	3.52517e-13	3.86501e-11	-0.384373	5.58844	4.05468	0.044049	0.0941772
ENSMUSG00000021400	78903	Wrnip1	Werner helicase interacting protein 1 [Source:MGI Symbol;Acc:MGI:1926153]	0.85009	5.42705	19.585	9.62208e-06	8.5267e-05	-0.683633	5.42705	12.3908	0.000431463	0.00228827
ENSMUSG00000021431	67797	Snrnp48	small nuclear ribonucleoprotein 48 (U11/U12) [Source:MGI Symbol;Acc:MGI:1915047]	0.629898	3.53572	7.56622	0.00594725	0.0170189	-0.655809	3.53572	7.73102	0.00542801	0.0178224
ENSMUSG00000021460	11992	Auh	AU RNA binding protein/enoyl-coenzyme A hydratase [Source:MGI Symbol;Acc:MGI:1338011]	0.769415	5.49859	13.5239	0.000235539	0.00119769	-0.518041	5.49859	6.06127	0.0138178	0.0377946
ENSMUSG00000021485	17121	Mxd3	Max dimerization protein 3 [Source:MGI Symbol;Acc:MGI:104987]	1.06077	-0.300775	4.70763	0.0300291	0.0628729	-1.56812	-0.300775	7.22186	0.00720212	0.022318
ENSMUSG00000021493	67399	Pdlim7	PDZ and LIM domain 7 [Source:MGI Symbol;Acc:MGI:1914649]	0.842602	4.5482	17.7827	2.4762e-05	0.000185605	-0.587287	4.5482	8.37825	0.00379739	0.0132988
ENSMUSG00000021500	212880	Ddx46	DEAD (Asp-Glu-Ala-Asp) box polypeptide 46 [Source:MGI Symbol;Acc:MGI:1920895]	0.426127	6.10649	6.3529	0.011719	0.0294422	-0.627045	6.10649	13.4882	0.000240073	0.00141207
ENSMUSG00000021532	69577	Fastkd3	FAST kinase domains 3 [Source:MGI Symbol;Acc:MGI:1916827]	0.518898	4.29976	7.88352	0.00498872	0.0147594	-0.656979	4.29976	12.0242	0.000525154	0.00269238
ENSMUSG00000021534	69315	1700001L19Rik	RIKEN cDNA 1700001L19 gene [Source:MGI Symbol;Acc:MGI:1916565]	1.80829	4.40171	53.4097	2.70755e-13	3.06886e-11	-0.689822	4.40171	7.74102	0.00539804	0.0177345
ENSMUSG00000021537	12626	Cetn3	centrin 3 [Source:MGI Symbol;Acc:MGI:1097706]	0.706251	7.05263	7.81298	0.00518723	0.0152046	-0.56684	7.05263	5.0287	0.0249306	0.0605051
ENSMUSG00000021546	15387	Hnrnpk	heterogeneous nuclear ribonucleoprotein K [Source:MGI Symbol;Acc:MGI:99894]	0.613953	7.57678	9.91279	0.00164134	0.00587748	-0.697403	7.57678	12.6984	0.000365962	0.00200425
ENSMUSG00000021557	67269	Agtpbp1	ATP/GTP binding protein 1 [Source:MGI Symbol;Acc:MGI:2159437]	0.515825	6.96999	7.01226	0.00809536	0.0217942	-0.640769	6.96999	10.7107	0.0010652	0.00479311
ENSMUSG00000021576	18570	Pdcd6	programmed cell death 6 [Source:MGI Symbol;Acc:MGI:109283]	1.02034	6.62353	26.3441	2.85692e-07	4.4416e-06	-0.479633	6.62353	5.85199	0.0155594	0.0415869
ENSMUSG00000021591	93692	Glrx	glutaredoxin [Source:MGI Symbol;Acc:MGI:2135625]	1.02124	6.02484	13.7461	0.000209258	0.00108544	-0.947213	6.02484	11.7423	0.000610943	0.00305017
ENSMUSG00000021595	28114	Nsun2	NOL1/NOP2/Sun domain family member 2 [Source:MGI Symbol;Acc:MGI:107252]	0.610961	5.7164	10.6902	0.00107702	0.0041543	-0.574891	5.7164	9.30749	0.00228219	0.00883538
ENSMUSG00000021615	108138	Xrcc4	X-ray repair complementing defective repair in Chinese hamster cells 4 [Source:MGI Symbol;Acc:MGI:1333799]	0.526305	3.64091	5.59218	0.0180409	0.0415879	-0.669907	3.64091	8.56665	0.00342376	0.0122251
ENSMUSG00000021619	66795	Atg10	autophagy related 10 [Source:MGI Symbol;Acc:MGI:1914045]	0.852681	4.27919	14.2457	0.000160426	0.000872615	-0.736831	4.27919	10.25	0.00136681	0.00583713
ENSMUSG00000021645	20595	Smn1	survival motor neuron 1 [Source:MGI Symbol;Acc:MGI:109257]	0.734659	3.96296	11.6849	0.000630091	0.00266914	-0.59744	3.96296	7.4021	0.00651478	0.0206082
ENSMUSG00000021650	68927	Ptcd2	pentatricopeptide repeat domain 2 [Source:MGI Symbol;Acc:MGI:1916177]	0.498313	5.20117	4.74839	0.0293257	0.0616773	-0.560466	5.20117	5.91398	0.0150212	0.040436
ENSMUSG00000021661	68558	Ankra2	ankyrin repeat, family A (RFXANK-like), 2 [Source:MGI Symbol;Acc:MGI:1915808]	0.492266	5.18588	5.57516	0.018217	0.0419305	-0.60914	5.18588	8.34599	0.00386541	0.0135088
ENSMUSG00000021701	20620	Plk2	polo-like kinase 2 [Source:MGI Symbol;Acc:MGI:1099790]	0.602164	7.86522	4.90494	0.02678	0.0573075	-0.81274	7.86522	8.86544	0.00290619	0.0107122
ENSMUSG00000021712	81003	Trim23	tripartite motif-containing 23 [Source:MGI Symbol;Acc:MGI:1933161]	0.521163	5.75681	4.69213	0.030301	0.0633316	-1.03573	5.75681	18.0194	2.18667e-05	0.000198815
ENSMUSG00000021743	54713	Fezf2	Fez family zinc finger 2 [Source:MGI Symbol;Acc:MGI:1859823]	1.86418	5.64154	37.9764	7.16042e-10	2.72991e-08	-0.886045	5.64154	8.85435	0.00292391	0.0107657
ENSMUSG00000021747	74430	4930452B06Rik	RIKEN cDNA 4930452B06 gene [Source:MGI Symbol;Acc:MGI:1926154]	0.678989	3.23602	6.90065	0.00861643	0.0228812	-0.586241	3.23602	4.89759	0.0268942	0.0640383
ENSMUSG00000021748	68263	Pdhb	pyruvate dehydrogenase (lipoamide) beta [Source:MGI Symbol;Acc:MGI:1915513]	0.779107	7.42224	18.0165	2.18996e-05	0.000167441	-0.515694	7.42224	7.89686	0.00495206	0.0165052
ENSMUSG00000021752	71393	Kctd6	potassium channel tetramerisation domain containing 6 [Source:MGI Symbol;Acc:MGI:1918643]	0.595739	5.02401	4.81981	0.0281345	0.0595829	-1.13943	5.02401	17.0099	3.71848e-05	0.000309106
ENSMUSG00000021771	22334	Vdac2	voltage-dependent anion channel 2 [Source:MGI Symbol;Acc:MGI:106915]	0.811914	7.8129	21.7024	3.18391e-06	3.38467e-05	-0.506402	7.8129	8.46281	0.00362481	0.0128202
ENSMUSG00000021772	69721	Nkiras1	NFKB inhibitor interacting Ras-like protein 1 [Source:MGI Symbol;Acc:MGI:1916971]	1.0541	7.62999	24.6515	6.86926e-07	9.37858e-06	-0.569921	7.62999	7.28086	0.00696934	0.0217387
ENSMUSG00000021785	59007	Ngly1	N-glycanase 1 [Source:MGI Symbol;Acc:MGI:1913276]	0.565558	4.66296	9.70587	0.00183681	0.00645827	-0.5764	4.66296	9.6848	0.00185799	0.00745997
ENSMUSG00000021810	70601	Ecd	ecdysoneless homolog (Drosophila) [Source:MGI Symbol;Acc:MGI:1917851]	0.556336	5.52658	10.3116	0.00132196	0.00492579	-0.558828	5.52658	10.1739	0.00142445	0.0060224
ENSMUSG00000021814	11750	Anxa7	annexin A7 [Source:MGI Symbol;Acc:MGI:88031]	0.925836	6.00041	14.3399	0.000152594	0.00083885	-0.85492	6.00041	12.1141	0.000500417	0.00258372
ENSMUSG00000021832	67089	Psmc6	proteasome (prosome, macropain) 26S subunit, ATPase, 6 [Source:MGI Symbol;Acc:MGI:1914339]	0.566203	6.83535	9.64655	0.00189708	0.00663403	-0.678712	6.83535	13.7022	0.000214202	0.00128376
ENSMUSG00000021868	105675	Ppif	peptidylprolyl isomerase F (cyclophilin F) [Source:MGI Symbol;Acc:MGI:2145814]	0.562876	4.59661	6.04648	0.013934	0.0338096	-0.936033	4.59661	16.0688	6.10821e-05	0.000460932
ENSMUSG00000021877	11843	Arf4	ADP-ribosylation factor 4 [Source:MGI Symbol;Acc:MGI:99433]	0.462906	7.29903	6.33111	0.0118638	0.0297349	-0.392672	7.29903	4.53833	0.0331439	0.0753577
ENSMUSG00000021892	24056	Sh3bp5	SH3-domain binding protein 5 (BTK-associated) [Source:MGI Symbol;Acc:MGI:1344391]	0.572481	5.83063	8.32419	0.00391207	0.012116	-0.935242	5.83063	21.5969	3.36398e-06	4.19872e-05
ENSMUSG00000021929	16648	Kpna3	karyopherin (importin) alpha 3 [Source:MGI Symbol;Acc:MGI:1100863]	0.37998	6.83083	4.49151	0.0340637	0.0697596	-0.566106	6.83083	9.86081	0.00168837	0.00690135
ENSMUSG00000021930	66674	Spryd7	SPRY domain containing 7 [Source:MGI Symbol;Acc:MGI:1913924]	0.80083	5.9035	15.6176	7.753e-05	0.000478501	-0.750637	5.9035	13.5151	0.000236646	0.00139632
ENSMUSG00000021947	68631	Cryl1	crystallin, lambda 1 [Source:MGI Symbol;Acc:MGI:1915881]	0.766175	4.75422	14.7379	0.000123536	0.000702956	-0.43337	4.75422	4.60715	0.0318389	0.073034
ENSMUSG00000022009	27275	Nufip1	nuclear fragile X mental retardation protein interacting protein 1 [Source:MGI Symbol;Acc:MGI:1351474]	0.558853	3.72146	6.83924	0.00891765	0.0235325	-0.929049	3.72146	17.5674	2.77308e-05	0.00024178
ENSMUSG00000022023	22380	Wbp4	WW domain binding protein 4 [Source:MGI Symbol;Acc:MGI:109568]	0.606193	6.0986	8.94223	0.00278652	0.00915112	-0.693117	6.0986	11.5136	0.000690872	0.00337489
ENSMUSG00000022024	67955	Sugt1	SGT1, suppressor of G2 allele of SKP1 (S. cerevisiae) [Source:MGI Symbol;Acc:MGI:1915205]	0.666779	6.00585	14.5933	0.000133389	0.000749613	-0.426032	6.00585	5.89161	0.0152132	0.040806
ENSMUSG00000022035	67179	Ccdc25	coiled-coil domain containing 25 [Source:MGI Symbol;Acc:MGI:1914429]	0.630468	6.46464	12.9953	0.000312272	0.0015131	-0.494903	6.46464	7.93907	0.00483787	0.0162084
ENSMUSG00000022043	66854	Trim35	tripartite motif-containing 35 [Source:MGI Symbol;Acc:MGI:1914104]	0.396882	6.88277	4.76036	0.0291224	0.0613344	-0.790442	6.88277	18.5537	1.65181e-05	0.000156637
ENSMUSG00000022051	12177	Bnip3l	BCL2/adenovirus E1B interacting protein 3-like [Source:MGI Symbol;Acc:MGI:1332659]	0.635481	6.5504	12.19	0.000480459	0.00214696	-0.388325	6.5504	4.52837	0.0333374	0.0756225
ENSMUSG00000022054	18040	Nefm	neurofilament, medium polypeptide [Source:MGI Symbol;Acc:MGI:97314]	1.24381	7.75222	27.5555	1.52651e-07	2.605e-06	-0.585209	7.75222	6.21595	0.0126604	0.0352203
ENSMUSG00000022092	19057	Ppp3cc	protein phosphatase 3, catalytic subunit, gamma isoform [Source:MGI Symbol;Acc:MGI:107162]	0.516997	3.57632	4.22811	0.0397597	0.0791372	-0.754668	3.57632	8.56347	0.00342974	0.0122387
ENSMUSG00000022099	13829	Dmtn	dematin actin binding protein [Source:MGI Symbol;Acc:MGI:99670]	0.730791	6.66557	11.6456	0.000643535	0.00271512	-0.654259	6.66557	9.27794	0.0023193	0.00895015
ENSMUSG00000022109	67381	Med4	mediator complex subunit 4 [Source:MGI Symbol;Acc:MGI:1914631]	0.684163	4.80243	11.4189	0.000727017	0.00300609	-0.715074	4.80243	12.0708	0.00051217	0.00263158
ENSMUSG00000022151	67515	Ttc33	tetratricopeptide repeat domain 33 [Source:MGI Symbol;Acc:MGI:1914765]	0.573077	6.00215	7.17523	0.00739171	0.0202327	-0.596819	6.00215	7.69211	0.00554629	0.018154
ENSMUSG00000022179	74359	4931414P19Rik	RIKEN cDNA 4931414P19 gene [Source:MGI Symbol;Acc:MGI:1921609]	0.920616	1.42256	11.2488	0.000796728	0.00323532	-0.80493	1.42256	7.03625	0.00798762	0.0242559
ENSMUSG00000022191	14000	Drosha	drosha, ribonuclease type III [Source:MGI Symbol;Acc:MGI:1261425]	0.476613	6.28988	6.69831	0.00965041	0.0250986	-0.657361	6.28988	12.538	0.000398768	0.00214539
ENSMUSG00000022205	20024	Sub1	SUB1 homolog (S. cerevisiae) [Source:MGI Symbol;Acc:MGI:104811]	1.04722	9.27018	13.4375	0.000246648	0.00124213	-0.761347	9.27018	7.16668	0.00742701	0.0228686
ENSMUSG00000022223	654795	Sdr39u1	short chain dehydrogenase/reductase family 39U, member 1 [Source:MGI Symbol;Acc:MGI:1916876]	1.08436	6.35572	32.5362	1.16995e-08	2.84434e-07	-0.445039	6.35572	5.51043	0.0189034	0.0485165
ENSMUSG00000022244	17117	Amacr	alpha-methylacyl-CoA racemase [Source:MGI Symbol;Acc:MGI:1098273]	0.721327	3.27026	10.1165	0.00146945	0.00538093	-0.625322	3.27026	7.10684	0.00767902	0.0235151
ENSMUSG00000022247	67832	Brix1	BRX1, biogenesis of ribosomes [Source:MGI Symbol;Acc:MGI:1915082]	0.636265	5.29156	9.38284	0.00219026	0.00749675	-0.521052	5.29156	6.18024	0.0129184	0.0358134
ENSMUSG00000022248	19355	Rad1	RAD1 checkpoint DNA exonuclease [Source:MGI Symbol;Acc:MGI:1316678]	0.500386	3.57012	4.7686	0.0289834	0.06108	-0.673954	3.57012	8.19049	0.00421104	0.0145201
ENSMUSG00000022285	22631	Ywhaz	tyrosine 3-monooxygenase/tryptophan 5-monooxygenase activation protein, zeta polypeptide [Source:MGI Symbol;Acc:MGI:109484]	0.846384	10.5417	9.34139	0.00224036	0.00762776	-0.735184	10.5417	7.0697	0.00783984	0.0238941
ENSMUSG00000022295	66335	Atp6v1c1	ATPase, H+ transporting, lysosomal V1 subunit C1 [Source:MGI Symbol;Acc:MGI:1913585]	0.861346	8.21559	13.832	0.000199901	0.00104694	-0.667768	8.21559	8.3413	0.0038754	0.0135352
ENSMUSG00000022307	170719	Oxr1	oxidation resistance 1 [Source:MGI Symbol;Acc:MGI:2179326]	0.501792	7.68031	5.07564	0.0242643	0.0528891	-0.913536	7.68031	16.5752	4.67586e-05	0.000373157
ENSMUSG00000022313	78581	Utp23	UTP23 small subunit processome component [Source:MGI Symbol;Acc:MGI:1925831]	0.565136	2.90235	6.9607	0.00833196	0.0222845	-0.528412	2.90235	5.5947	0.0180149	0.0467513
ENSMUSG00000022332	13992	Khdrbs3	KH domain containing, RNA binding, signal transduction associated 3 [Source:MGI Symbol;Acc:MGI:1313312]	1.33083	6.45519	33.6587	6.5682e-09	1.75448e-07	-0.833531	6.45519	13.3017	0.000265161	0.00153753
ENSMUSG00000022338	223527	Eny2	enhancer of yellow 2 homolog (Drosophila) [Source:MGI Symbol;Acc:MGI:1919286]	0.57143	6.03433	7.12784	0.00758962	0.0206648	-0.587213	6.03433	7.44472	0.00636229	0.0202442
ENSMUSG00000022340	319613	Sybu	syntabulin (syntaxin-interacting) [Source:MGI Symbol;Acc:MGI:2442392]	0.676252	6.93115	9.11854	0.00253032	0.00845371	-0.747165	6.93115	11.0445	0.000889495	0.00415403
ENSMUSG00000022375	54562	Lrrc6	leucine rich repeat containing 6 (testis) [Source:MGI Symbol;Acc:MGI:1859553]	0.706847	3.32354	6.03021	0.0140631	0.0340685	-0.700886	3.32354	5.68919	0.0170698	0.0448045
ENSMUSG00000022377	13196	Asap1	ArfGAP with SH3 domain, ankyrin repeat and PH domain1 [Source:MGI Symbol;Acc:MGI:1342335]	0.771043	6.91765	15.9117	6.63671e-05	0.000422027	-0.605711	6.91765	9.78315	0.00176118	0.0071352
ENSMUSG00000022378	223601	Fam49b	family with sequence similarity 49, member B [Source:MGI Symbol;Acc:MGI:1923520]	0.426107	7.1544	4.84318	0.0277556	0.0589219	-0.777848	7.1544	15.91	6.64275e-05	0.000494353
ENSMUSG00000022391	19387	Rangap1	RAN GTPase activating protein 1 [Source:MGI Symbol;Acc:MGI:103071]	0.772054	7.33801	13.7462	0.000209239	0.00108544	-0.761143	7.33801	13.2842	0.000267645	0.00154798
ENSMUSG00000022400	56438	Rbx1	ring-box 1 [Source:MGI Symbol;Acc:MGI:1891829]	0.722187	7.95046	12.7063	0.000364423	0.00171804	-0.456487	7.95046	5.09103	0.02405	0.0586904
ENSMUSG00000022420	54152	Dnal4	dynein, axonemal, light chain 4 [Source:MGI Symbol;Acc:MGI:1859217]	0.997241	4.02957	25.6972	3.99402e-07	5.96083e-06	-0.406726	4.02957	4.09454	0.0430219	0.0923116
ENSMUSG00000022436	20401	Sh3bp1	SH3-domain binding protein 1 [Source:MGI Symbol;Acc:MGI:104603]	0.79129	6.84078	12.1604	0.000488161	0.0021727	-0.516751	6.84078	5.18615	0.0227676	0.0561492
ENSMUSG00000022442	319953	Ttll1	tubulin tyrosine ligase-like 1 [Source:MGI Symbol;Acc:MGI:2443047]	0.583572	5.18197	8.14592	0.00431581	0.0131013	-0.773747	5.18197	13.9389	0.000188853	0.00116044
ENSMUSG00000022516	66911	Nudt16l1	nudix (nucleoside diphosphate linked moiety X)-type motif 16-like 1 [Source:MGI Symbol;Acc:MGI:1914161]	0.648899	5.53167	13.6326	0.00022229	0.00114109	-0.49509	5.53167	7.78507	0.00526797	0.0173649
ENSMUSG00000022523	14167	Fgf12	fibroblast growth factor 12 [Source:MGI Symbol;Acc:MGI:109183]	1.0115	7.42979	20.7292	5.29019e-06	5.21098e-05	-0.790325	7.42979	12.6839	0.000368825	0.00201487
ENSMUSG00000022525	27281	Hrasls	HRAS-like suppressor [Source:MGI Symbol;Acc:MGI:1351473]	0.629987	4.67926	9.0257	0.0026621	0.00881672	-0.82607	4.67926	14.9333	0.000111377	0.000754584
ENSMUSG00000022536	74022	Glyr1	glyoxylate reductase 1 homolog (Arabidopsis) [Source:MGI Symbol;Acc:MGI:1921272]	0.59973	7.68755	13.577	0.000228977	0.00117035	-0.38694	7.68755	5.64447	0.0175105	0.045779
ENSMUSG00000022552	106025	Sharpin	SHANK-associated RH domain interacting protein [Source:MGI Symbol;Acc:MGI:1913331]	0.73426	4.67428	9.36837	0.00220762	0.00754503	-0.529479	4.67428	4.77927	0.0288043	0.0674095
ENSMUSG00000022556	15499	Hsf1	heat shock factor 1 [Source:MGI Symbol;Acc:MGI:96238]	0.533506	3.57134	5.24866	0.0219637	0.0489297	-0.503163	3.57134	4.45264	0.0348472	0.0783806
ENSMUSG00000022557	12181	Bop1	block of proliferation 1 [Source:MGI Symbol;Acc:MGI:1334460]	0.936272	4.33102	19.5354	9.87525e-06	8.7234e-05	-0.520991	4.33102	5.83975	0.015668	0.0417922
ENSMUSG00000022635	67197	Zcrb1	zinc finger CCHC-type and RNA binding motif 1 [Source:MGI Symbol;Acc:MGI:1914447]	0.678363	4.99069	7.63765	0.00571622	0.0164646	-0.558653	4.99069	5.099	0.0239396	0.0584466
ENSMUSG00000022677	66086	Fopnl	Fgfr1op N-terminal like [Source:MGI Symbol;Acc:MGI:1913336]	0.418041	6.64232	3.90873	0.0480359	0.0923238	-0.604075	6.64232	8.07384	0.00449089	0.0153021
ENSMUSG00000022706	18100	Mrpl40	mitochondrial ribosomal protein L40 [Source:MGI Symbol;Acc:MGI:1332635]	1.03615	4.78046	24.5971	7.06593e-07	9.55894e-06	-0.461214	4.78046	4.78406	0.0287244	0.0672695
ENSMUSG00000022707	74185	Gbe1	glucan (1,4-alpha-), branching enzyme 1 [Source:MGI Symbol;Acc:MGI:1921435]	0.574743	4.149	8.35345	0.00384956	0.0119586	-0.48478	4.149	5.69342	0.0170286	0.0447174
ENSMUSG00000022722	56297	Arl6	ADP-ribosylation factor-like 6 [Source:MGI Symbol;Acc:MGI:1927136]	1.11866	5.3394	20.5175	5.90871e-06	5.71618e-05	-0.867453	5.3394	12.1873	0.000481148	0.00250601
ENSMUSG00000022752	28185	Tomm70a	translocase of outer mitochondrial membrane 70 homolog A (yeast) [Source:MGI Symbol;Acc:MGI:106295]	0.396255	7.55433	4.44075	0.0350909	0.0714381	-0.492781	7.55433	6.82865	0.00897071	0.0266532
ENSMUSG00000022757	21787	Tfg	Trk-fused gene [Source:MGI Symbol;Acc:MGI:1338041]	0.572305	6.00664	8.22325	0.00413571	0.0126808	-0.815839	6.00664	16.3769	5.19129e-05	0.000404289
ENSMUSG00000022761	66863	Lztr1	leucine-zipper-like transcriptional regulator, 1 [Source:MGI Symbol;Acc:MGI:1914113]	0.461988	6.73444	6.899	0.0086244	0.0228987	-0.619188	6.73444	12.2296	0.000470383	0.00246122
ENSMUSG00000022774	68092	Ncbp2	nuclear cap binding protein subunit 2 [Source:MGI Symbol;Acc:MGI:1915342]	0.642824	5.71015	8.2299	0.00412058	0.0126506	-0.480267	5.71015	4.55732	0.0327784	0.0747088
ENSMUSG00000022783	50525	Spag6l	sperm associated antigen 6-like [Source:MGI Symbol;Acc:MGI:1354388]	0.529651	2.87682	4.32256	0.0376103	0.0756672	-0.652578	2.87682	6.15522	0.0131025	0.0361981
ENSMUSG00000022787	68980	Wdr53	WD repeat domain 53 [Source:MGI Symbol;Acc:MGI:1916230]	0.636016	2.6054	7.1473	0.00750767	0.0204916	-0.753168	2.6054	8.97638	0.00273492	0.0101906
ENSMUSG00000022800	69823	Fyttd1	forty-two-three domain containing 1 [Source:MGI Symbol;Acc:MGI:1917955]	0.615346	6.52501	7.88454	0.00498591	0.0147537	-0.983238	6.52501	19.7257	8.93925e-06	9.49089e-05
ENSMUSG00000022808	69150	Snx4	sorting nexin 4 [Source:MGI Symbol;Acc:MGI:1916400]	0.737034	5.63767	17.2044	3.35658e-05	0.000238097	-0.540052	5.63767	9.07696	0.0025885	0.00974682
ENSMUSG00000022841	11773	Ap2m1	adaptor-related protein complex 2, mu 1 subunit [Source:MGI Symbol;Acc:MGI:1298405]	0.573484	6.99525	12.7863	0.00034916	0.00165316	-0.48816	6.99525	9.19504	0.00242672	0.0092793
ENSMUSG00000022972	68001	1110004E09Rik	RIKEN cDNA 1110004E09 gene [Source:MGI Symbol;Acc:MGI:1915251]	1.47221	4.33366	33.7139	6.38437e-09	1.71368e-07	-0.619027	4.33366	5.88926	0.0152335	0.0408448
ENSMUSG00000022978	66578	Mis18a	MIS18 kinetochore protein A [Source:MGI Symbol;Acc:MGI:1913828]	0.757561	2.28262	5.27892	0.0215851	0.0482723	-0.866269	2.28262	6.38114	0.0115339	0.0326562
ENSMUSG00000023015	26934	Racgap1	Rac GTPase-activating protein 1 [Source:MGI Symbol;Acc:MGI:1349423]	0.695881	3.52406	10.5534	0.00115974	0.00442452	-0.536536	3.52406	5.89232	0.0152071	0.0407962
ENSMUSG00000023055	67488	Calcoco1	calcium binding and coiled coil domain 1 [Source:MGI Symbol;Acc:MGI:1914738]	0.387031	4.88902	4.63866	0.0312594	0.0650511	-0.531549	4.88902	8.49093	0.00356922	0.0126396
ENSMUSG00000023075	68050	Akirin1	akirin 1 [Source:MGI Symbol;Acc:MGI:1915300]	0.631464	4.12555	7.84261	0.00510288	0.0150072	-0.529974	4.12555	5.33392	0.0209143	0.0524994
ENSMUSG00000023087	12457	Noct	nocturnin [Source:MGI Symbol;Acc:MGI:109382]	0.687898	5.83596	11.2459	0.000798004	0.00323972	-0.837286	5.83596	16.3162	5.36032e-05	0.000416101
ENSMUSG00000023094	76467	Msrb2	methionine sulfoxide reductase B2 [Source:MGI Symbol;Acc:MGI:1923717]	1.32838	4.65424	48.2598	3.73327e-12	3.04008e-10	-0.464323	4.65424	5.77256	0.0162783	0.0431115
ENSMUSG00000023104	19718	Rfc2	replication factor C (activator 1) 2 [Source:MGI Symbol;Acc:MGI:1341868]	0.909621	5.21993	23.7739	1.08343e-06	1.36857e-05	-0.454667	5.21993	5.84379	0.0156322	0.0417098
ENSMUSG00000023106	68184	Denr	density-regulated protein [Source:MGI Symbol;Acc:MGI:1915434]	1.24356	6.13943	32.7561	1.04476e-08	2.58156e-07	-0.512384	6.13943	5.61764	0.0177806	0.0462865
ENSMUSG00000023286	140499	Ube2j2	ubiquitin-conjugating enzyme E2J 2 [Source:MGI Symbol;Acc:MGI:2153608]	1.13747	3.24765	21.2212	4.09223e-06	4.20374e-05	-0.540786	3.24765	4.53231	0.0332606	0.0755327
ENSMUSG00000023307	69104	2018-03-05	membrane-associated ring finger (C3HC4) 5 [Source:MGI Symbol;Acc:MGI:1915207]	0.92051	5.4615	12.4437	0.000419408	0.00192492	-0.931051	5.4615	12.5249	0.000401555	0.00215762
ENSMUSG00000023330	69185	Dtwd1	DTW domain containing 1 [Source:MGI Symbol;Acc:MGI:1916435]	0.759468	4.11787	8.74168	0.00311018	0.0100179	-0.831809	4.11787	10.1065	0.00147745	0.00619606
ENSMUSG00000023456	21991	Tpi1	triosephosphate isomerase 1 [Source:MGI Symbol;Acc:MGI:98797]	1.08521	9.17419	21.6072	3.34587e-06	3.53221e-05	-0.517927	9.17419	5.00257	0.0253097	0.0611509
ENSMUSG00000023460	19328	Rab12	RAB12, member RAS oncogene family [Source:MGI Symbol;Acc:MGI:894284]	0.666502	6.70904	9.86643	0.00168322	0.00600767	-0.727618	6.70904	11.6429	0.000644474	0.00318253
ENSMUSG00000023572	17151	Ccndbp1	cyclin D-type binding-protein 1 [Source:MGI Symbol;Acc:MGI:109595]	0.647916	6.51854	13.1387	0.000289255	0.0014217	-0.461218	6.51854	6.61064	0.0101371	0.0293798
ENSMUSG00000023800	24001	Tiam2	T cell lymphoma invasion and metastasis 2 [Source:MGI Symbol;Acc:MGI:1344338]	1.1117	5.56127	22.0859	2.60715e-06	2.88109e-05	-1.02285	5.56127	18.3891	1.80082e-05	0.0001682
ENSMUSG00000023932	71702	Cdc5l	cell division cycle 5-like (S. pombe) [Source:MGI Symbol;Acc:MGI:1918952]	0.651319	5.54361	11.9582	0.000544079	0.00237309	-0.468816	5.54361	6.10558	0.0134756	0.0370154
ENSMUSG00000023965	50758	Fbxl17	F-box and leucine-rich repeat protein 17 [Source:MGI Symbol;Acc:MGI:1354704]	0.528493	5.69184	7.13935	0.00754107	0.020566	-0.542841	5.69184	7.4045	0.00650608	0.0205885
ENSMUSG00000024002	57261	Brd4	bromodomain containing 4 [Source:MGI Symbol;Acc:MGI:1888520]	0.535297	6.85859	7.6202	0.00577179	0.0165933	-0.449209	6.85859	5.33991	0.0208426	0.0523797
ENSMUSG00000024065	57440	Ehd3	EH-domain containing 3 [Source:MGI Symbol;Acc:MGI:1928900]	0.453012	6.82036	5.70386	0.0169276	0.0394773	-0.737038	6.82036	14.873	0.000114999	0.000776171
ENSMUSG00000024082	73694	Ndufaf7	NADH dehydrogenase (ubiquinone) 1 alpha subcomplex assembly factor 7 [Source:MGI Symbol;Acc:MGI:1920944]	0.551702	6.04096	8.82409	0.0029728	0.00964393	-0.422055	6.04096	5.11193	0.0237619	0.0581387
ENSMUSG00000024091	30960	Vapa	vesicle-associated membrane protein, associated protein A [Source:MGI Symbol;Acc:MGI:1353561]	1.07601	8.84924	15.2288	9.52388e-05	0.000566195	-0.829222	8.84924	9.11281	0.00253825	0.00960722
ENSMUSG00000024118	72016	1600002H07Rik	RIKEN cDNA 1600002H07 gene [Source:MGI Symbol;Acc:MGI:1919266]	0.807578	3.12931	12.2813	0.000457511	0.0020631	-0.492177	3.12931	4.26587	0.0388853	0.0852235
ENSMUSG00000024146	56724	Cript	cysteine-rich PDZ-binding protein [Source:MGI Symbol;Acc:MGI:1929655]	0.727183	7.03473	7.65611	0.00565802	0.0163222	-0.587414	7.03473	4.99378	0.0254385	0.0613649
ENSMUSG00000024190	19252	Dusp1	dual specificity phosphatase 1 [Source:MGI Symbol;Acc:MGI:105120]	0.922785	5.50952	5.20882	0.0224726	0.0497988	-0.851478	5.50952	4.42096	0.0355001	0.0794604
ENSMUSG00000024217	20630	Snrpc	U1 small nuclear ribonucleoprotein C [Source:MGI Symbol;Acc:MGI:109489]	0.663716	2.38011	6.74483	0.00940196	0.0245666	-0.563323	2.38011	4.44892	0.0349234	0.0785203
ENSMUSG00000024218	68776	Taf11	TATA-box binding protein associated factor 11 [Source:MGI Symbol;Acc:MGI:1916026]	1.08503	4.78231	20.2848	6.67281e-06	6.3268e-05	-0.683293	4.78231	7.91887	0.00489218	0.0163511
ENSMUSG00000024258	69241	Polr2d	polymerase (RNA) II (DNA directed) polypeptide D [Source:MGI Symbol;Acc:MGI:1916491]	0.620335	5.96422	7.95256	0.00480194	0.0143103	-0.660161	5.96422	8.89324	0.00286228	0.0105806
ENSMUSG00000024269	66648	Tpgs2	tubulin polyglutamylase complex subunit 2 [Source:MGI Symbol;Acc:MGI:1913898]	0.969791	6.57214	16.5738	4.67935e-05	0.000314614	-0.566168	6.57214	5.67277	0.0172302	0.0451198
ENSMUSG00000024273	68046	2700062C07Rik	RIKEN cDNA 2700062C07 gene [Source:MGI Symbol;Acc:MGI:1915296]	0.706695	3.71424	6.81967	0.0090159	0.0237465	-0.764667	3.71424	7.67014	0.00561421	0.0183333
ENSMUSG00000024359	15526	Hspa9	heat shock protein 9 [Source:MGI Symbol;Acc:MGI:96245]	0.576577	7.89548	9.45765	0.00210271	0.00724438	-0.375385	7.89548	4.00913	0.0452546	0.0964362
ENSMUSG00000024360	225363	Etf1	eukaryotic translation termination factor 1 [Source:MGI Symbol;Acc:MGI:2385071]	0.508118	5.99759	6.3453	0.0117693	0.0295465	-0.405235	5.99759	3.99566	0.0456176	0.0970863
ENSMUSG00000024403	66237	Atp6v1g2	ATPase, H+ transporting, lysosomal V1 subunit G2 [Source:MGI Symbol;Acc:MGI:1913487]	1.30979	9.32343	23.0171	1.6057e-06	1.91304e-05	-0.822277	9.32343	9.24173	0.00236561	0.00908339
ENSMUSG00000024422	69192	Dhx16	DEAH (Asp-Glu-Ala-His) box polypeptide 16 [Source:MGI Symbol;Acc:MGI:1916442]	0.441977	3.67019	5.08616	0.0241175	0.0526169	-0.407523	3.67019	4.07589	0.0434993	0.0932288
ENSMUSG00000024423	16210	Impact	impact, RWD domain protein [Source:MGI Symbol;Acc:MGI:1098233]	0.625596	8.92378	4.94999	0.0260908	0.0560832	-1.00023	8.92378	12.492	0.000408708	0.00219044
ENSMUSG00000024426	73242	Atat1	alpha tubulin acetyltransferase 1 [Source:MGI Symbol;Acc:MGI:1913869]	0.397394	5.44118	4.18685	0.0407388	0.0808367	-0.549752	5.44118	7.85072	0.00508006	0.0168482
ENSMUSG00000024454	15183	Hdac3	histone deacetylase 3 [Source:MGI Symbol;Acc:MGI:1343091]	0.360816	6.47129	4.81894	0.0281487	0.0596054	-0.719465	6.47129	18.7823	1.4652e-05	0.000141992
ENSMUSG00000024500	72930	Ppp2r2b	protein phosphatase 2, regulatory subunit B, beta [Source:MGI Symbol;Acc:MGI:1920180]	0.958606	7.36328	23.2891	1.39385e-06	1.68943e-05	-0.638401	7.36328	10.3623	0.00128612	0.00557376
ENSMUSG00000024502	76217	Jakmip2	janus kinase and microtubule interacting protein 2 [Source:MGI Symbol;Acc:MGI:1923467]	0.478245	6.44998	5.94898	0.0147258	0.0352993	-0.785731	6.44998	15.7831	7.10348e-05	0.00052172
ENSMUSG00000024528	67222	Srfbp1	serum response factor binding protein 1 [Source:MGI Symbol;Acc:MGI:1914472]	0.539666	2.42353	4.22462	0.0398415	0.0792907	-0.568075	2.42353	4.32863	0.0374763	0.0828834
ENSMUSG00000024563	17126	Smad2	SMAD family member 2 [Source:MGI Symbol;Acc:MGI:108051]	0.725914	4.99986	13.9315	0.000189593	0.00100139	-0.76858	4.99986	15.1195	0.000100917	0.000694943
ENSMUSG00000024571	NA	Gm16286	predicted gene 16286 [Source:MGI Symbol;Acc:MGI:3833940]	0.865273	6.87657	24.1986	8.68974e-07	1.13088e-05	-0.473081	6.87657	7.23681	0.00714236	0.0221712
ENSMUSG00000024580	17714	Grpel2	GrpE-like 2, mitochondrial [Source:MGI Symbol;Acc:MGI:1334416]	0.530395	4.55934	6.81358	0.00904674	0.0238128	-0.856199	4.55934	16.978	3.78149e-05	0.000312878
ENSMUSG00000024581	108123	Napg	N-ethylmaleimide sensitive fusion protein attachment protein gamma [Source:MGI Symbol;Acc:MGI:104561]	0.753811	7.59139	18.286	1.901e-05	0.000148253	-0.563408	7.59139	10.2059	0.00139992	0.00594537
ENSMUSG00000024583	53382	Txnl1	thioredoxin-like 1 [Source:MGI Symbol;Acc:MGI:1860078]	1.1324	6.32618	30.8031	2.85581e-08	6.22967e-07	-0.523955	6.32618	6.63095	0.0100222	0.0291322
ENSMUSG00000024587	70223	Nars	asparaginyl-tRNA synthetase [Source:MGI Symbol;Acc:MGI:1917473]	0.50025	8.35285	7.4026	0.00651297	0.0183283	-0.467548	8.35285	6.45419	0.0110691	0.0315861
ENSMUSG00000024604	66810	Rbm22	RNA binding motif protein 22 [Source:MGI Symbol;Acc:MGI:1914060]	0.417634	5.45117	4.74091	0.0294534	0.061884	-0.598919	5.45117	9.54407	0.00200596	0.00793445
ENSMUSG00000024660	16319	Incenp	inner centromere protein [Source:MGI Symbol;Acc:MGI:1313288]	0.560446	2.86401	5.23463	0.0221415	0.0492353	-0.584078	2.86401	5.25354	0.0219021	0.0544955
ENSMUSG00000024668	66072	Sdhaf2	succinate dehydrogenase complex assembly factor 2 [Source:MGI Symbol;Acc:MGI:1913322]	0.623728	6.01799	10.4651	0.00121651	0.00460708	-0.427403	6.01799	4.87371	0.0272687	0.0646549
ENSMUSG00000024747	26358	Aldh1a7	aldehyde dehydrogenase family 1, subfamily A7 [Source:MGI Symbol;Acc:MGI:1347050]	1.43916	1.96471	24.8647	6.1499e-07	8.60422e-06	-0.838302	1.96471	7.12509	0.00760124	0.0233203
ENSMUSG00000024750	22682	Zfand5	zinc finger, AN1-type domain 5 [Source:MGI Symbol;Acc:MGI:1278334]	0.745323	6.85767	10.1912	0.00141114	0.00520604	-0.85018	6.85767	13.1348	0.000289867	0.00165279
ENSMUSG00000024787	69024	Snx15	sorting nexin 15 [Source:MGI Symbol;Acc:MGI:1916274]	0.686175	4.33711	9.92073	0.00163427	0.00586415	-0.4638	4.33711	4.40559	0.0358214	0.0800033
ENSMUSG00000024792	81909	Zfpl1	zinc finger like protein 1 [Source:MGI Symbol;Acc:MGI:1891017]	0.559588	3.11635	5.10401	0.0238706	0.0521936	-0.526958	3.11635	4.29111	0.0383121	0.0843529
ENSMUSG00000024800	54364	Rpp30	ribonuclease P/MRP 30 subunit [Source:MGI Symbol;Acc:MGI:1859683]	0.536949	4.82012	6.59122	0.0102483	0.026331	-0.501431	4.82012	5.61488	0.0178086	0.0463378
ENSMUSG00000024829	353242	Mrpl21	mitochondrial ribosomal protein L21 [Source:MGI Symbol;Acc:MGI:2660674]	0.998459	5.50637	24.7978	6.36702e-07	8.83884e-06	-0.405772	5.50637	4.07278	0.0435795	0.0933648
ENSMUSG00000024855	107975	Pacs1	phosphofurin acidic cluster sorting protein 1 [Source:MGI Symbol;Acc:MGI:1277113]	0.382778	5.6604	3.92777	0.0474948	0.091462	-0.598467	5.6604	9.41887	0.00214764	0.0084037
ENSMUSG00000024862	16594	Klc2	kinesin light chain 2 [Source:MGI Symbol;Acc:MGI:107953]	1.06617	4.77712	27.7421	1.38611e-07	2.40206e-06	-0.696059	4.77712	11.4954	0.000697673	0.00339822
ENSMUSG00000024878	226043	Cbwd1	COBW domain containing 1 [Source:MGI Symbol;Acc:MGI:2385089]	0.619508	3.28714	7.48346	0.00622683	0.0176649	-0.619078	3.28714	7.02142	0.00805405	0.0244228
ENSMUSG00000024901	240518	Peli3	pellino 3 [Source:MGI Symbol;Acc:MGI:1924963]	0.517374	2.32715	3.94665	0.0469647	0.0906702	-0.640125	2.32715	5.53884	0.0185989	0.047911
ENSMUSG00000024949	22668	Sf1	splicing factor 1 [Source:MGI Symbol;Acc:MGI:1095403]	0.51014	5.27534	5.99339	0.0143596	0.0346545	-0.494302	5.27534	5.52545	0.0187418	0.0481903
ENSMUSG00000024966	20867	Stip1	stress-induced phosphoprotein 1 [Source:MGI Symbol;Acc:MGI:109130]	0.887778	6.59363	19.6477	9.31164e-06	8.30866e-05	-0.453398	6.59363	5.13658	0.0234267	0.057521
ENSMUSG00000024968	104383	Rcor2	REST corepressor 2 [Source:MGI Symbol;Acc:MGI:1859854]	0.89666	1.53462	7.53206	0.00606104	0.0172656	-0.858871	1.53462	5.96574	0.0145865	0.0395042
ENSMUSG00000024970	68229	AI846148	expressed sequence AI846148 [Source:MGI Symbol;Acc:MGI:2147611]	0.639285	3.46764	9.06575	0.00260442	0.00865645	-0.841857	3.46764	14.5183	0.000138807	0.000905322
ENSMUSG00000024983	53611	Vti1a	vesicle transport through interaction with t-SNAREs 1A [Source:MGI Symbol;Acc:MGI:1855699]	0.804715	4.42256	15.331	9.02237e-05	0.000540644	-0.507368	4.42256	5.90861	0.0150671	0.0405235
ENSMUSG00000025024	76479	Smndc1	survival motor neuron domain containing 1 [Source:MGI Symbol;Acc:MGI:1923729]	0.65375	4.63582	7.02411	0.00804192	0.0216747	-0.589516	4.63582	5.58974	0.018066	0.0468694
ENSMUSG00000025068	14873	Gsto1	glutathione S-transferase omega 1 [Source:MGI Symbol;Acc:MGI:1342273]	0.827101	5.5124	13.2631	0.000270688	0.00134522	-0.615046	5.5124	7.23939	0.00713212	0.0221517
ENSMUSG00000025128	59058	Bhlhe22	basic helix-loop-helix family, member e22 [Source:MGI Symbol;Acc:MGI:1930001]	0.650741	4.34765	5.64229	0.0175323	0.040611	-1.01805	4.34765	13.232	0.000275205	0.001587
ENSMUSG00000025134	21681	Alyref	Aly/REF export factor [Source:MGI Symbol;Acc:MGI:1341044]	0.976181	3.95898	11.1249	0.000851788	0.00341999	-0.595768	3.95898	4.05019	0.0441663	0.0943689
ENSMUSG00000025155	68730	Dus1l	dihydrouridine synthase 1-like (S. cerevisiae) [Source:MGI Symbol;Acc:MGI:1915980]	0.791803	4.1799	13.6944	0.0002151	0.00110922	-0.426984	4.1799	3.85752	0.0495235	0.103734
ENSMUSG00000025170	217371	Rab40b	Rab40B, member RAS oncogene family [Source:MGI Symbol;Acc:MGI:2183451]	0.474546	5.02894	3.93568	0.047272	0.0911246	-0.881978	5.02894	13.2023	0.000279608	0.00160884
ENSMUSG00000025175	63828	Fn3k	fructosamine 3 kinase [Source:MGI Symbol;Acc:MGI:1926834]	0.980867	4.51675	18.5659	1.64134e-05	0.000131865	-0.462112	4.51675	4.04745	0.0442382	0.0945103
ENSMUSG00000025178	84095	Pi4k2a	phosphatidylinositol 4-kinase type 2 alpha [Source:MGI Symbol;Acc:MGI:1934031]	0.412227	5.17944	5.80737	0.0159592	0.0376321	-0.359341	5.17944	4.3147	0.0377845	0.0833889
ENSMUSG00000025190	14718	Got1	glutamic-oxaloacetic transaminase 1, soluble [Source:MGI Symbol;Acc:MGI:95791]	0.581843	8.86439	6.14525	0.0131766	0.0323154	-0.962837	8.86439	16.6114	4.58753e-05	0.000367331
ENSMUSG00000025193	66388	Cutc	cutC copper transporter [Source:MGI Symbol;Acc:MGI:1913638]	0.514687	3.31535	4.71233	0.029947	0.0627394	-0.503899	3.31535	4.28389	0.0384753	0.0846012
ENSMUSG00000025223	16825	Ldb1	LIM domain binding 1 [Source:MGI Symbol;Acc:MGI:894762]	0.630102	3.64382	7.10889	0.00767028	0.0208438	-0.613516	3.64382	6.40298	0.0113929	0.0323541
ENSMUSG00000025264	69499	Tsr2	TSR2 20S rRNA accumulation [Source:MGI Symbol;Acc:MGI:1916749]	0.841872	6.49538	18.6237	1.59232e-05	0.000128543	-0.400273	6.49538	4.20884	0.0402138	0.0874818
ENSMUSG00000025266	237107	Gnl3l	guanine nucleotide binding protein-like 3 (nucleolar)-like [Source:MGI Symbol;Acc:MGI:2448557]	0.526382	8.33509	3.90229	0.0482203	0.0925951	-0.764713	8.33509	8.1741	0.00424928	0.0146339
ENSMUSG00000025287	56360	Acot9	acyl-CoA thioesterase 9 [Source:MGI Symbol;Acc:MGI:1928939]	0.842967	4.40428	15.4649	8.40513e-05	0.000510116	-0.529756	4.40428	5.93087	0.0148779	0.0401314
ENSMUSG00000025340	56715	Rabgef1	RAB guanine nucleotide exchange factor (GEF) 1 [Source:MGI Symbol;Acc:MGI:1929459]	0.547503	5.14352	6.57678	0.0103318	0.0265048	-0.534719	5.14352	6.16506	0.0130298	0.0360328
ENSMUSG00000025373	67588	Rnf41	ring finger protein 41 [Source:MGI Symbol;Acc:MGI:1914838]	0.582685	5.82449	12.0975	0.0005049	0.00223063	-0.373699	5.82449	4.90708	0.0267469	0.0637618
ENSMUSG00000025377	78777	Tepsin	TEPSIN, adaptor related protein complex 4 accessory protein [Source:MGI Symbol;Acc:MGI:1926027]	0.558522	3.11099	5.88924	0.0152337	0.0362873	-0.517842	3.11099	4.75024	0.0292942	0.0682989
ENSMUSG00000025402	17937	Nab2	Ngfi-A binding protein 2 [Source:MGI Symbol;Acc:MGI:107563]	1.05043	2.79528	13.0705	0.000299978	0.00146496	-0.630854	2.79528	4.43543	0.0352003	0.078963
ENSMUSG00000025436	68876	Atp23	ATP23 metallopeptidase and ATP synthase assembly factor homolog [Source:MGI Symbol;Acc:MGI:1916984]	0.910056	2.37644	7.25149	0.00708424	0.0195844	-0.780448	2.37644	4.99831	0.0253721	0.0612717
ENSMUSG00000025439	12729	Clns1a	chloride channel, nucleotide-sensitive, 1A [Source:MGI Symbol;Acc:MGI:109638]	0.831669	5.97569	13.9358	0.000189156	0.000999716	-0.80093	5.97569	12.7611	0.0003539	0.00194965
ENSMUSG00000025470	69752	Zfp511	zinc finger protein 511 [Source:MGI Symbol;Acc:MGI:1917002]	0.960012	3.39925	19.2133	1.16898e-05	0.000100408	-0.545253	3.39925	5.80205	0.0160075	0.0425287
ENSMUSG00000025484	54399	Bet1l	Bet1 golgi vesicular membrane trafficking protein like [Source:MGI Symbol;Acc:MGI:1913128]	0.686099	5.95509	15.9491	6.50691e-05	0.000415348	-0.517715	5.95509	8.96033	0.00275905	0.0102691
ENSMUSG00000025485	101489	Ric8a	RIC8 guanine nucleotide exchange factor A [Source:MGI Symbol;Acc:MGI:2141866]	0.78066	5.26755	18.7556	1.48589e-05	0.000121708	-0.593106	5.26755	10.5509	0.0011613	0.00515439
ENSMUSG00000025532	12909	Crcp	calcitonin gene-related peptide-receptor component protein [Source:MGI Symbol;Acc:MGI:1100818]	0.717867	5.21679	15.622	7.73508e-05	0.000477571	-0.455101	5.21679	6.15998	0.0130673	0.0361126
ENSMUSG00000025576	52897	Rbfox3	RNA binding protein, fox-1 homolog (C. elegans) 3 [Source:MGI Symbol;Acc:MGI:106368]	0.574317	6.9446	9.90582	0.00164757	0.00589672	-0.54223	6.9446	8.7669	0.00306746	0.0111862
ENSMUSG00000025578	30951	Cbx8	chromobox 8 [Source:MGI Symbol;Acc:MGI:1353589]	1.37964	2.03581	15.4115	8.64611e-05	0.000522285	-0.948472	2.03581	6.60859	0.0101488	0.0294085
ENSMUSG00000025580	192170	Eif4a3	eukaryotic translation initiation factor 4A3 [Source:MGI Symbol;Acc:MGI:1923731]	0.504326	5.38437	6.78651	0.00918493	0.0241085	-0.424654	5.38437	4.73046	0.029633	0.0689013
ENSMUSG00000025613	12469	Cct8	chaperonin containing Tcp1, subunit 8 (theta) [Source:MGI Symbol;Acc:MGI:107183]	0.7349	7.70899	16.1704	5.78914e-05	0.00037626	-0.555681	7.70899	9.24003	0.00236781	0.00908716
ENSMUSG00000025630	15452	Hprt	hypoxanthine guanine phosphoribosyl transferase [Source:MGI Symbol;Acc:MGI:96217]	1.11854	8.15823	19.0196	1.29382e-05	0.00010901	-0.78704	8.15823	9.50605	0.00204796	0.00806633
ENSMUSG00000025722	71968	Wdr73	WD repeat domain 73 [Source:MGI Symbol;Acc:MGI:1919218]	0.580272	4.87479	8.9301	0.00280508	0.00920127	-0.650739	4.87479	10.8711	0.000976748	0.00446335
ENSMUSG00000025855	19085	Prkar1b	protein kinase, cAMP dependent regulatory, type I beta [Source:MGI Symbol;Acc:MGI:97759]	0.992002	9.28481	17.8063	2.44573e-05	0.000183649	-0.497221	9.28481	4.53317	0.033244	0.0755237
ENSMUSG00000025869	28126	Nop16	NOP16 nucleolar protein [Source:MGI Symbol;Acc:MGI:107862]	1.01712	5.43605	27.7231	1.39983e-07	2.42334e-06	-0.422225	5.43605	4.74831	0.029327	0.0683469
ENSMUSG00000025872	73666	Thoc3	THO complex 3 [Source:MGI Symbol;Acc:MGI:1920916]	0.933789	4.26052	17.6996	2.58683e-05	0.000192094	-0.671236	4.26052	8.79878	0.00301432	0.0110308
ENSMUSG00000025889	20617	Snca	synuclein, alpha [Source:MGI Symbol;Acc:MGI:1277151]	1.37255	9.95072	19.3068	1.11307e-05	9.62459e-05	-0.92368	9.95072	8.91013	0.00283593	0.010506
ENSMUSG00000025894	67618	Aasdhppt	aminoadipate-semialdehyde dehydrogenase-phosphopantetheinyl transferase [Source:MGI Symbol;Acc:MGI:1914868]	0.540512	5.40685	6.77108	0.00926468	0.0242836	-0.775858	5.40685	13.596	0.000226669	0.0013455
ENSMUSG00000025917	26754	Cops5	COP9 signalosome subunit 5 [Source:MGI Symbol;Acc:MGI:1349415]	0.736751	7.15043	17.566	2.77503e-05	0.000203903	-0.388433	7.15043	4.88356	0.0271137	0.0643698
ENSMUSG00000025939	66799	Ube2w	ubiquitin-conjugating enzyme E2W (putative) [Source:MGI Symbol;Acc:MGI:1914049]	0.96423	7.54461	19.0498	1.27353e-05	0.000107788	-0.960426	7.54461	18.8005	1.45129e-05	0.000141204
ENSMUSG00000025979	19070	Mob4	MOB family member 4, phocein [Source:MGI Symbol;Acc:MGI:104899]	0.521354	6.68463	7.45363	0.00633087	0.0178969	-1.03002	6.68463	28.3564	1.00915e-07	2.30006e-06
ENSMUSG00000025981	67876	Coq10b	coenzyme Q10B [Source:MGI Symbol;Acc:MGI:1915126]	0.834366	4.76039	13.7106	0.000213252	0.00110179	-0.978655	4.76039	18.1477	2.04418e-05	0.000187691
ENSMUSG00000025995	73674	Wdr75	WD repeat domain 75 [Source:MGI Symbol;Acc:MGI:1920924]	0.359712	4.99731	5.00734	0.0252401	0.0545903	-0.516363	4.99731	9.98323	0.00157972	0.00654348
ENSMUSG00000026018	70375	Ica1l	islet cell autoantigen 1-like [Source:MGI Symbol;Acc:MGI:1917625]	0.508043	5.11821	6.13223	0.0132739	0.0325018	-0.710741	5.11821	11.6673	0.000636085	0.00314945
ENSMUSG00000026020	55989	Nop58	NOP58 ribonucleoprotein [Source:MGI Symbol;Acc:MGI:1933184]	0.332074	5.2713	3.96378	0.0464892	0.0899596	-0.43544	5.2713	6.64333	0.00995275	0.0289857
ENSMUSG00000026021	22218	Sumo1	small ubiquitin-like modifier 1 [Source:MGI Symbol;Acc:MGI:1197010]	0.964257	6.33881	20.303	6.60978e-06	6.28566e-05	-0.425843	6.33881	3.97738	0.0461154	0.0979842
ENSMUSG00000026035	70225	Ppil3	peptidylprolyl isomerase (cyclophilin)-like 3 [Source:MGI Symbol;Acc:MGI:1917475]	0.68762	4.57837	10.8422	0.000992129	0.00388673	-0.453664	4.57837	4.60005	0.031971	0.0732669
ENSMUSG00000026036	65102	Nif3l1	Ngg1 interacting factor 3-like 1 (S. pombe) [Source:MGI Symbol;Acc:MGI:1929485]	0.476524	4.82923	6.56094	0.0104241	0.0267041	-0.443919	4.82923	5.55069	0.0184734	0.0476785
ENSMUSG00000026049	75623	Tex30	testis expressed 30 [Source:MGI Symbol;Acc:MGI:1922873]	1.38399	3.98471	16.0178	6.27496e-05	0.000402533	-0.680091	3.98471	3.85593	0.0495704	0.103787
ENSMUSG00000026090	72097	2010300C02Rik	RIKEN cDNA 2010300C02 gene [Source:MGI Symbol;Acc:MGI:1919347]	0.501468	6.03609	4.26157	0.038984	0.077889	-0.808265	6.03609	10.8787	0.000972747	0.00444749
ENSMUSG00000026150	75734	Mff	mitochondrial fission factor [Source:MGI Symbol;Acc:MGI:1922984]	0.748012	7.64931	8.23625	0.00410618	0.0126179	-0.900972	7.64931	11.8527	0.000575783	0.00290402
ENSMUSG00000026154	68002	Sdhaf4	succinate dehydrogenase complex assembly factor 4 [Source:MGI Symbol;Acc:MGI:1915252]	1.19824	6.83041	20.757	5.21395e-06	5.14797e-05	-0.645798	6.83041	6.10884	0.0134508	0.0369654
ENSMUSG00000026155	98366	Smap1	small ArfGAP 1 [Source:MGI Symbol;Acc:MGI:2138261]	0.992906	4.69906	21.4648	3.60392e-06	3.77377e-05	-0.428774	4.69906	3.92734	0.0475069	0.100454
ENSMUSG00000026171	57751	Rnf25	ring finger protein 25 [Source:MGI Symbol;Acc:MGI:1890215]	0.708253	4.18651	8.92015	0.00282041	0.00924069	-0.486219	4.18651	4.09859	0.042919	0.0921379
ENSMUSG00000026239	18582	Pde6d	phosphodiesterase 6D, cGMP-specific, rod, delta [Source:MGI Symbol;Acc:MGI:1270843]	0.658539	4.64756	5.15397	0.0231933	0.0510119	-0.729564	4.64756	6.2012	0.0127664	0.0354916
ENSMUSG00000026240	26895	Cops7b	COP9 signalosome subunit 7B [Source:MGI Symbol;Acc:MGI:1349388]	0.352437	4.67379	4.10501	0.0427564	0.0840646	-0.39187	4.67379	4.90756	0.0267394	0.0637618
ENSMUSG00000026245	23874	Farsb	phenylalanyl-tRNA synthetase, beta subunit [Source:MGI Symbol;Acc:MGI:1346035]	0.616254	6.22935	7.70693	0.00550091	0.0159567	-0.512056	6.22935	5.28877	0.0214633	0.0536016
ENSMUSG00000026248	69163	Mrpl44	mitochondrial ribosomal protein L44 [Source:MGI Symbol;Acc:MGI:1916413]	1.16628	5.21767	35.7312	2.26506e-09	7.22365e-08	-0.549773	5.21767	7.84641	0.00509217	0.016875
ENSMUSG00000026270	23830	Capn10	calpain 10 [Source:MGI Symbol;Acc:MGI:1344392]	0.537153	3.99412	6.4684	0.0109809	0.0278719	-0.501859	3.99412	5.39202	0.0202291	0.0511136
ENSMUSG00000026273	69821	Mterf4	mitochondrial transcription termination factor 4 [Source:MGI Symbol;Acc:MGI:1918355]	0.646108	4.14829	8.83532	0.00295457	0.0095959	-0.547764	4.14829	6.13257	0.0132714	0.0365994
ENSMUSG00000026275	66385	Ppp1r7	protein phosphatase 1, regulatory (inhibitor) subunit 7 [Source:MGI Symbol;Acc:MGI:1913635]	0.483985	7.24229	8.29804	0.00396878	0.0122586	-0.413519	7.24229	6.02481	0.0141061	0.038439
ENSMUSG00000026277	59041	Stk25	serine/threonine kinase 25 (yeast) [Source:MGI Symbol;Acc:MGI:1891699]	0.813504	7.83383	19.6895	9.10999e-06	8.16783e-05	-0.694001	7.83383	14.3029	0.000155622	0.000989972
ENSMUSG00000026279	67026	Thap4	THAP domain containing 4 [Source:MGI Symbol;Acc:MGI:1914276]	1.01851	3.81773	18.9144	1.36716e-05	0.0001141	-0.55503	3.81773	5.39639	0.0201784	0.0510548
ENSMUSG00000026281	21915	Dtymk	deoxythymidylate kinase [Source:MGI Symbol;Acc:MGI:108396]	0.534244	4.50538	7.56996	0.0059349	0.0169923	-0.879052	4.50538	19.4748	1.01936e-05	0.000105489
ENSMUSG00000026341	74117	Actr3	ARP3 actin-related protein 3 [Source:MGI Symbol;Acc:MGI:1921367]	0.499595	6.52949	4.60387	0.0318998	0.0661611	-0.702108	6.52949	8.98621	0.00272025	0.0101491
ENSMUSG00000026377	67949	Nifk	nucleolar protein interacting with the FHA domain of MKI67 [Source:MGI Symbol;Acc:MGI:1915199]	1.06389	5.55637	23.5879	1.19335e-06	1.47629e-05	-0.750043	5.55637	11.607	0.00065704	0.00323601
ENSMUSG00000026429	67196	Ube2t	ubiquitin-conjugating enzyme E2T [Source:MGI Symbol;Acc:MGI:1914446]	1.07555	1.07437	6.08407	0.0136406	0.0332685	-1.07284	1.07437	5.30947	0.0212098	0.0530954
ENSMUSG00000026470	58244	Stx6	syntaxin 6 [Source:MGI Symbol;Acc:MGI:1926235]	0.546391	5.8493	10.3156	0.00131913	0.0049196	-0.488845	5.8493	8.11675	0.00438582	0.0150184
ENSMUSG00000026496	11545	Parp1	poly (ADP-ribose) polymerase family, member 1 [Source:MGI Symbol;Acc:MGI:1340806]	1.12798	5.53159	26.1493	3.16013e-07	4.83679e-06	-0.548477	5.53159	6.17864	0.0129301	0.0358319
ENSMUSG00000026527	24012	Rgs7	regulator of G protein signaling 7 [Source:MGI Symbol;Acc:MGI:1346089]	0.83349	5.15259	16.3866	5.16497e-05	0.000342173	-0.716725	5.15259	11.8325	0.000582055	0.00292949
ENSMUSG00000026578	74895	Ccdc181	coiled-coil domain containing 181 [Source:MGI Symbol;Acc:MGI:1922145]	0.662491	4.27233	10.8156	0.00100651	0.00393478	-0.430877	4.27233	4.41859	0.0355494	0.0795121
ENSMUSG00000026585	16579	Kifap3	kinesin-associated protein 3 [Source:MGI Symbol;Acc:MGI:107566]	0.625684	8.41094	9.143	0.00249671	0.0083631	-0.495656	8.41094	5.74168	0.0165669	0.0437334
ENSMUSG00000026608	226823	Kctd3	potassium channel tetramerisation domain containing 3 [Source:MGI Symbol;Acc:MGI:2444629]	0.422206	5.86384	5.11468	0.0237242	0.0519548	-0.759497	5.86384	16.1483	5.857e-05	0.000447329
ENSMUSG00000026617	23827	Bpnt1	bisphosphate 3'-nucleotidase 1 [Source:MGI Symbol;Acc:MGI:1338800]	0.30083	6.41945	3.8877	0.048641	0.0932411	-0.36708	6.41945	5.71652	0.016806	0.0442091
ENSMUSG00000026620	226778	Mark1	MAP/microtubule affinity regulating kinase 1 [Source:MGI Symbol;Acc:MGI:2664902]	0.550739	6.20621	9.83952	0.00170802	0.00608324	-0.435308	6.20621	6.07441	0.0137154	0.0375756
ENSMUSG00000026670	107652	Uap1	UDP-N-acetylglucosamine pyrophosphorylase 1 [Source:MGI Symbol;Acc:MGI:1334459]	0.496616	5.59038	5.27489	0.0216352	0.0483648	-0.889314	5.59038	16.453	4.98716e-05	0.000392952
ENSMUSG00000026679	71233	Enkur	enkurin, TRPC channel interacting protein [Source:MGI Symbol;Acc:MGI:1918483]	0.838889	2.38033	6.37316	0.0115859	0.0291867	-0.752263	2.38033	4.79683	0.0285122	0.0668379
ENSMUSG00000026755	74192	Arpc5l	actin related protein 2/3 complex, subunit 5-like [Source:MGI Symbol;Acc:MGI:1921442]	0.775985	6.50389	13.0794	0.000298559	0.00145973	-0.82561	6.50389	14.6386	0.000130223	0.000860036
ENSMUSG00000026766	109129	Mmadhc	methylmalonic aciduria (cobalamin deficiency) cblD type, with homocystinuria [Source:MGI Symbol;Acc:MGI:1923786]	0.608857	6.12227	12.9837	0.000314216	0.00152033	-0.485373	6.12227	8.14445	0.00431932	0.0148355
ENSMUSG00000026767	66960	Fam188a	family with sequence similarity 188, member A [Source:MGI Symbol;Acc:MGI:1914210]	0.721732	5.92657	13.0797	0.000298508	0.00145973	-0.666508	5.92657	10.9997	0.000911285	0.00422989
ENSMUSG00000026797	20910	Stxbp1	syntaxin binding protein 1 [Source:MGI Symbol;Acc:MGI:107363]	0.612056	9.96596	6.23781	0.0125051	0.0310087	-0.691872	9.96596	7.95005	0.00480859	0.0161393
ENSMUSG00000026799	68975	Med27	mediator complex subunit 27 [Source:MGI Symbol;Acc:MGI:1916225]	0.754591	4.8314	12.4128	0.000426406	0.00194904	-0.561017	4.8314	6.72217	0.00952215	0.0279451
ENSMUSG00000026825	13429	Dnm1	dynamin 1 [Source:MGI Symbol;Acc:MGI:107384]	0.45138	8.05257	4.01051	0.0452173	0.0880568	-0.496907	8.05257	4.8462	0.0277071	0.0654261
ENSMUSG00000026831	69327	1700007K13Rik	RIKEN cDNA 1700007K13 gene [Source:MGI Symbol;Acc:MGI:1916577]	1.76823	0.895789	14.0231	0.000180581	0.000961971	-1.07238	0.895789	4.42084	0.0355026	0.0794604
ENSMUSG00000026889	67889	Rbm18	RNA binding motif protein 18 [Source:MGI Symbol;Acc:MGI:1915139]	0.532289	6.37023	9.81802	0.0017281	0.00614173	-0.878153	6.37023	26.0832	3.27024e-07	6.16041e-06
ENSMUSG00000026914	59029	Psmd14	proteasome (prosome, macropain) 26S subunit, non-ATPase, 14 [Source:MGI Symbol;Acc:MGI:1913284]	0.588989	7.40717	10.1374	0.00145294	0.00533677	-0.494263	7.40717	7.11634	0.00763846	0.0234079
ENSMUSG00000026966	68475	Ssna1	SS nuclear autoantigen 1 [Source:MGI Symbol;Acc:MGI:1915725]	1.06124	5.83138	35.2072	2.96433e-09	9.12415e-08	-0.449298	5.83138	6.28579	0.012171	0.0340677
ENSMUSG00000027010	78830	Slc25a12	solute carrier family 25 (mitochondrial carrier, Aralar), member 12 [Source:MGI Symbol;Acc:MGI:1926080]	0.58099	7.53718	9.76289	0.0017807	0.00629797	-0.506822	7.53718	7.40703	0.00649695	0.0205728
ENSMUSG00000027011	22193	Ube2e3	ubiquitin-conjugating enzyme E2E 3 [Source:MGI Symbol;Acc:MGI:107412]	0.813929	6.63309	14.9564	0.000110026	0.000639089	-0.681707	6.63309	10.4348	0.00123663	0.00540249
ENSMUSG00000027030	53416	Stk39	serine/threonine kinase 39 [Source:MGI Symbol;Acc:MGI:1858416]	0.604703	6.19706	9.92299	0.00163227	0.00586093	-0.494282	6.19706	6.56242	0.0104155	0.0300103
ENSMUSG00000027080	381379	Med19	mediator complex subunit 19 [Source:MGI Symbol;Acc:MGI:1914234]	0.954446	4.88096	24.7323	6.58724e-07	9.07978e-06	-0.549863	4.88096	8.00668	0.00466051	0.0157407
ENSMUSG00000027091	69082	Zc3h15	zinc finger CCCH-type containing 15 [Source:MGI Symbol;Acc:MGI:1919747]	1.11737	6.84501	27.9328	1.256e-07	2.20853e-06	-0.754494	6.84501	12.7825	0.000349875	0.00193454
ENSMUSG00000027099	53375	Mtx2	metaxin 2 [Source:MGI Symbol;Acc:MGI:1859652]	1.00232	5.31365	14.5311	0.000137868	0.000770655	-0.88686	5.31365	11.2299	0.000804911	0.00383482
ENSMUSG00000027108	67059	Ola1	Obg-like ATPase 1 [Source:MGI Symbol;Acc:MGI:1914309]	1.00323	7.234	23.861	1.03546e-06	1.31789e-05	-0.743165	7.234	13.1112	0.000293537	0.00167088
ENSMUSG00000027184	53872	Caprin1	cell cycle associated protein 1 [Source:MGI Symbol;Acc:MGI:1858234]	0.535595	6.76445	8.09561	0.00443727	0.0134069	-0.423829	6.76445	5.04314	0.0247237	0.0600724
ENSMUSG00000027203	110074	Dut	deoxyuridine triphosphatase [Source:MGI Symbol;Acc:MGI:1346051]	0.733584	4.27257	8.41566	0.00372003	0.0116111	-1.05719	4.27257	16.6589	4.47392e-05	0.000360298
ENSMUSG00000027206	12848	Cops2	COP9 signalosome subunit 2 [Source:MGI Symbol;Acc:MGI:1330276]	0.406601	6.81611	5.04027	0.0247646	0.0537838	-0.714598	6.81611	15.3334	9.01073e-05	0.000634039
ENSMUSG00000027245	67693	Hypk	huntingtin interacting protein K [Source:MGI Symbol;Acc:MGI:1914943]	0.712733	2.27739	5.02995	0.0249126	0.0540563	-0.810808	2.27739	5.98246	0.0144489	0.0391756
ENSMUSG00000027273	20614	Snap25	synaptosomal-associated protein 25 [Source:MGI Symbol;Acc:MGI:98331]	0.748837	12.5488	5.30622	0.0212494	0.047585	-0.960577	12.5488	8.66963	0.00323558	0.0116989
ENSMUSG00000027274	59030	Mkks	McKusick-Kaufman syndrome [Source:MGI Symbol;Acc:MGI:1891836]	1.01031	6.49571	17.0381	3.66368e-05	0.000256504	-0.647429	6.49571	7.02176	0.0080525	0.0244225
ENSMUSG00000027286	66606	Lrrc57	leucine rich repeat containing 57 [Source:MGI Symbol;Acc:MGI:1913856]	0.371321	5.87544	4.20089	0.0404029	0.0803057	-0.612925	5.87544	11.2232	0.000807817	0.00384538
ENSMUSG00000027304	76246	Rtf1	RTF1, Paf1/RNA polymerase II complex component [Source:MGI Symbol;Acc:MGI:1309480]	0.540065	5.98911	6.22067	0.0126267	0.0312404	-0.700424	5.98911	10.3014	0.0013293	0.00571476
ENSMUSG00000027313	69065	Chac1	ChaC, cation transport regulator 1 [Source:MGI Symbol;Acc:MGI:1916315]	1.02561	2.23247	12.3465	0.000441825	0.00200531	-1.12244	2.23247	13.009	0.000310005	0.00174978
ENSMUSG00000027368	13537	Dusp2	dual specificity phosphatase 2 [Source:MGI Symbol;Acc:MGI:101911]	0.95818	0.477194	6.18664	0.0128718	0.0317117	-1.05174	0.477194	5.801	0.0160171	0.0425406
ENSMUSG00000027384	69487	Ndufaf5	NADH dehydrogenase (ubiquinone) complex I, assembly factor 5 [Source:MGI Symbol;Acc:MGI:1916737]	1.0814	5.34359	33.1344	8.60021e-09	2.18589e-07	-0.506053	5.34359	7.17421	0.00739589	0.0227811
ENSMUSG00000027398	16176	Il1b	interleukin 1 beta [Source:MGI Symbol;Acc:MGI:96543]	1.50822	1.00992	15.0518	0.000104602	0.000612245	-1.21335	1.00992	7.85255	0.00507492	0.0168344
ENSMUSG00000027404	20638	Snrpb	small nuclear ribonucleoprotein B [Source:MGI Symbol;Acc:MGI:98342]	1.17428	5.64399	18.7235	1.51112e-05	0.000123353	-0.631071	5.64399	5.43606	0.0197251	0.0501422
ENSMUSG00000027438	17957	Napb	N-ethylmaleimide sensitive fusion protein attachment protein beta [Source:MGI Symbol;Acc:MGI:104562]	0.58308	9.69792	6.49098	0.0108423	0.027591	-0.848422	9.69792	13.6295	0.000222663	0.00132735
ENSMUSG00000027455	386649	Nsfl1c	NSFL1 (p97) cofactor (p47) [Source:MGI Symbol;Acc:MGI:3042273]	0.853661	5.87188	15.7605	7.18879e-05	0.000450642	-0.422313	5.87188	3.85206	0.049685	0.103957
ENSMUSG00000027506	21985	Tpd52	tumor protein D52 [Source:MGI Symbol;Acc:MGI:107749]	0.685606	5.81805	12.4764	0.000412117	0.00189716	-0.49642	5.81805	6.46126	0.0110251	0.0315017
ENSMUSG00000027509	66679	Rae1	ribonucleic acid export 1 [Source:MGI Symbol;Acc:MGI:1913929]	0.668106	5.40807	9.92157	0.00163353	0.00586338	-0.75517	5.40807	12.4008	0.000429154	0.00227911
ENSMUSG00000027531	55980	Impa1	inositol (myo)-1(or 4)-monophosphatase 1 [Source:MGI Symbol;Acc:MGI:1933158]	0.341823	6.93476	4.62168	0.0315703	0.0655759	-0.508467	6.93476	10.1134	0.00147192	0.00617749
ENSMUSG00000027534	74718	Snx16	sorting nexin 16 [Source:MGI Symbol;Acc:MGI:1921968]	0.908439	5.37874	13.0824	0.000298088	0.0014587	-0.90601	5.37874	12.7932	0.000347886	0.00192537
ENSMUSG00000027573	76425	Gid8	GID complex subunit 8 [Source:MGI Symbol;Acc:MGI:1923675]	0.736805	5.00746	8.14939	0.00430757	0.0130834	-0.902632	5.00746	11.9277	0.000553046	0.00281047
ENSMUSG00000027599	74252	Armc1	armadillo repeat containing 1 [Source:MGI Symbol;Acc:MGI:1921502]	0.682703	6.79789	13.8455	0.000198466	0.00104203	-0.642438	6.79789	12.152	0.000490343	0.00254266
ENSMUSG00000027618	18041	Nfs1	nitrogen fixation gene 1 (S. cerevisiae) [Source:MGI Symbol;Acc:MGI:1316706]	0.412601	4.76458	4.08951	0.0431501	0.0846699	-0.647261	4.76458	9.73528	0.00180765	0.00727351
ENSMUSG00000027674	58869	Pex5l	peroxisomal biogenesis factor 5-like [Source:MGI Symbol;Acc:MGI:1916672]	0.788184	6.04019	15.5457	8.0535e-05	0.000492158	-0.621952	6.04019	9.58411	0.00196269	0.00779452
ENSMUSG00000027770	72162	Dhx36	DEAH (Asp-Glu-Ala-His) box polypeptide 36 [Source:MGI Symbol;Acc:MGI:1919412]	0.489644	6.44085	9.35775	0.00222045	0.00757498	-0.325008	6.44085	4.08655	0.0432258	0.0927135
ENSMUSG00000027776	16159	Il12a	interleukin 12a [Source:MGI Symbol;Acc:MGI:96539]	0.996208	2.72582	8.43652	0.00367759	0.0114968	-0.845181	2.72582	5.77655	0.0162414	0.0430342
ENSMUSG00000027777	30953	Schip1	schwannomin interacting protein 1 [Source:MGI Symbol;Acc:MGI:1353557]	0.933409	9.75627	13.446	0.000245535	0.00123763	-0.896742	9.75627	12.4166	0.000425526	0.00226322
ENSMUSG00000027787	97112	Nmd3	NMD3 ribosome export adaptor [Source:MGI Symbol;Acc:MGI:2140103]	0.504951	5.07618	7.98089	0.00472738	0.0141243	-0.598884	5.07618	10.8913	0.000966161	0.0044234
ENSMUSG00000027804	67738	Ppid	peptidylprolyl isomerase D (cyclophilin D) [Source:MGI Symbol;Acc:MGI:1914988]	0.647286	5.63394	7.75855	0.00534587	0.0155825	-0.766051	5.63394	10.6876	0.00107855	0.00484149
ENSMUSG00000027835	56426	Pdcd10	programmed cell death 10 [Source:MGI Symbol;Acc:MGI:1928396]	0.850241	5.11929	12.8899	0.000330364	0.00158384	-0.655483	5.11929	7.54221	0.006027	0.0194205
ENSMUSG00000027865	14547	Gdap2	ganglioside-induced differentiation-associated-protein 2 [Source:MGI Symbol;Acc:MGI:1338001]	0.38263	5.33416	4.61803	0.0316376	0.0656913	-0.986614	5.33416	29.4242	5.81474e-08	1.45369e-06
ENSMUSG00000027879	20333	Sec22b	SEC22 homolog B, vesicle trafficking protein [Source:MGI Symbol;Acc:MGI:1338759]	0.835544	7.34016	9.84761	0.00170053	0.00606169	-0.691255	7.34016	6.74463	0.00940304	0.0276584
ENSMUSG00000027944	23897	Hax1	HCLS1 associated X-1 [Source:MGI Symbol;Acc:MGI:1346319]	0.697696	3.28833	8.10849	0.00440584	0.0133288	-0.586487	3.28833	5.43314	0.0197581	0.0501881
ENSMUSG00000027968	28036	Larp7	La ribonucleoprotein domain family, member 7 [Source:MGI Symbol;Acc:MGI:107634]	0.915163	4.33492	19.45	1.03269e-05	9.05559e-05	-0.490783	4.33492	5.40611	0.0200664	0.0508523
ENSMUSG00000028005	54195	Gucy1b3	guanylate cyclase 1, soluble, beta 3 [Source:MGI Symbol;Acc:MGI:1860604]	0.590614	7.15432	7.068	0.00784729	0.021256	-0.911611	7.15432	16.5939	4.63008e-05	0.000370208
ENSMUSG00000028007	76561	Snx7	sorting nexin 7 [Source:MGI Symbol;Acc:MGI:1923811]	0.875066	3.58078	10.4815	0.00120575	0.0045751	-0.925465	3.58078	11.1529	0.000838989	0.00395561
ENSMUSG00000028010	68147	Gar1	GAR1 ribonucleoprotein [Source:MGI Symbol;Acc:MGI:1930948]	0.715391	2.09983	4.84744	0.0276872	0.0588138	-0.739971	2.09983	4.78605	0.0286912	0.0672012
ENSMUSG00000028035	67035	Dnajb4	DnaJ heat shock protein family (Hsp40) member B4 [Source:MGI Symbol;Acc:MGI:1914285]	0.532449	6.30012	7.26258	0.00704062	0.0194863	-0.922738	6.30012	21.3215	3.88344e-06	4.73092e-05
ENSMUSG00000028098	67845	Rnf115	ring finger protein 115 [Source:MGI Symbol;Acc:MGI:1915095]	0.76674	6.10206	11.2836	0.000781927	0.00319222	-0.727942	6.10206	10.07	0.00150705	0.00629033
ENSMUSG00000028134	56195	Ptbp2	polypyrimidine tract binding protein 2 [Source:MGI Symbol;Acc:MGI:1860489]	0.425471	6.72012	4.89628	0.0269146	0.057544	-0.749911	6.72012	14.9742	0.000108991	0.000740213
ENSMUSG00000028145	75778	Them4	thioesterase superfamily member 4 [Source:MGI Symbol;Acc:MGI:1923028]	0.684785	5.48573	11.4857	0.000701352	0.00291434	-0.605631	5.48573	8.83631	0.00295296	0.0108536
ENSMUSG00000028149	229877	Rap1gds1	RAP1, GTP-GDP dissociation stimulator 1 [Source:MGI Symbol;Acc:MGI:2385189]	1.19815	8.29378	40.8024	1.68422e-10	8.00405e-09	-0.562584	8.29378	9.15218	0.00248421	0.00944742
ENSMUSG00000028156	13684	Eif4e	eukaryotic translation initiation factor 4E [Source:MGI Symbol;Acc:MGI:95305]	0.611707	6.80272	9.66483	0.00187829	0.00657519	-0.646619	6.80272	10.709	0.00106617	0.00479621
ENSMUSG00000028212	12448	Ccne2	cyclin E2 [Source:MGI Symbol;Acc:MGI:1329034]	0.735531	4.5318	6.65728	0.00987518	0.025576	-0.668051	4.5318	5.37172	0.0204658	0.0515862
ENSMUSG00000028218	68099	Fam92a	family with sequence similarity 92, member A [Source:MGI Symbol;Acc:MGI:1915349]	0.792728	5.74487	11.2856	0.000781109	0.00319121	-0.632543	5.74487	7.12503	0.00760152	0.0233203
ENSMUSG00000028221	72519	Tmem55a	transmembrane protein 55A [Source:MGI Symbol;Acc:MGI:1919769]	0.485611	6.68544	4.11973	0.0423859	0.0835122	-0.546552	6.68544	5.18618	0.0227672	0.0561492
ENSMUSG00000028247	230027	Coq3	coenzyme Q3 methyltransferase [Source:MGI Symbol;Acc:MGI:101813]	0.533769	4.64226	6.50023	0.010786	0.0274895	-0.736624	4.64226	11.9467	0.000547447	0.00278455
ENSMUSG00000028249	53378	Sdcbp	syndecan binding protein [Source:MGI Symbol;Acc:MGI:1337026]	0.86535	7.87032	17.803	2.44991e-05	0.000183798	-0.481951	7.87032	5.55699	0.0184071	0.0475556
ENSMUSG00000028251	77032	Tstd3	thiosulfate sulfurtransferase (rhodanese)-like domain containing 3 [Source:MGI Symbol;Acc:MGI:1924282]	1.08477	4.22261	18.8082	1.44544e-05	0.000118917	-0.890188	4.22261	12.2097	0.000475417	0.00248292
ENSMUSG00000028261	68493	Ndufaf4	NADH dehydrogenase (ubiquinone) 1 alpha subcomplex, assembly factor 4 [Source:MGI Symbol;Acc:MGI:1915743]	0.598653	5.29507	6.84732	0.00887742	0.0234592	-0.848978	5.29507	13.4289	0.000247773	0.00145024
ENSMUSG00000028266	16911	Lmo4	LIM domain only 4 [Source:MGI Symbol;Acc:MGI:109360]	1.07638	7.89344	21.6386	3.29166e-06	3.49037e-05	-0.765282	7.89344	11.0179	0.000902342	0.00419999
ENSMUSG00000028271	229906	Gtf2b	general transcription factor IIB [Source:MGI Symbol;Acc:MGI:2385191]	0.96134	5.52785	19.2852	1.12576e-05	9.71427e-05	-0.678921	5.52785	9.52038	0.00203202	0.00801674
ENSMUSG00000028277	56228	Ube2j1	ubiquitin-conjugating enzyme E2J 1 [Source:MGI Symbol;Acc:MGI:1926245]	0.545686	5.97096	8.90618	0.00284208	0.00930078	-0.652361	5.97096	12.5035	0.000406189	0.00217833
ENSMUSG00000028291	433693	Akirin2	akirin 2 [Source:MGI Symbol;Acc:MGI:1889364]	0.887483	5.9846	14.2928	0.000156464	0.000856621	-0.753784	5.9846	10.228	0.00138322	0.00589267
ENSMUSG00000028322	66362	Exosc3	exosome component 3 [Source:MGI Symbol;Acc:MGI:1913612]	0.758116	2.44206	8.39511	0.00376231	0.0117201	-0.803978	2.44206	8.49612	0.00355905	0.0126115
ENSMUSG00000028389	22696	Zfp37	zinc finger protein 37 [Source:MGI Symbol;Acc:MGI:99181]	0.579928	4.38312	7.92437	0.00487734	0.0145066	-0.945275	4.38312	19.9666	7.88052e-06	8.48497e-05
ENSMUSG00000028391	71354	Wdr31	WD repeat domain 31 [Source:MGI Symbol;Acc:MGI:1918604]	0.470206	3.23246	5.41283	0.0199893	0.0452911	-0.538487	3.23246	6.56399	0.0104063	0.0299889
ENSMUSG00000028410	15502	Dnaja1	DnaJ heat shock protein family (Hsp40) member A1 [Source:MGI Symbol;Acc:MGI:1270129]	0.809358	7.54212	18.7165	1.51668e-05	0.000123686	-0.697588	7.54212	13.8663	0.000196288	0.00119455
ENSMUSG00000028426	19359	Rad23b	RAD23 homolog B, nucleotide excision repair protein [Source:MGI Symbol;Acc:MGI:105128]	0.502248	6.12477	5.94705	0.0147419	0.0353331	-0.836132	6.12477	16.1416	5.87796e-05	0.000448398
ENSMUSG00000028430	230082	Nol6	nucleolar protein family 6 (RNA-associated) [Source:MGI Symbol;Acc:MGI:2140151]	0.500813	5.28175	6.37904	0.0115476	0.0291075	-0.622066	5.28175	9.60902	0.00193624	0.00769868
ENSMUSG00000028436	68970	Dcaf12	DDB1 and CUL4 associated factor 12 [Source:MGI Symbol;Acc:MGI:1916220]	0.509673	4.96717	5.19322	0.0226752	0.0501617	-0.579196	4.96717	6.5582	0.0104402	0.0300712
ENSMUSG00000028441	73721	1110017D15Rik	RIKEN cDNA 1110017D15 gene [Source:MGI Symbol;Acc:MGI:1920971]	0.690113	2.20081	5.55338	0.018445	0.042374	-0.679996	2.20081	4.9338	0.0263364	0.0630412
ENSMUSG00000028452	269523	Vcp	valosin containing protein [Source:MGI Symbol;Acc:MGI:99919]	0.941703	5.37723	28.4552	9.58909e-08	1.75452e-06	-0.478601	5.37723	7.22261	0.00719909	0.0223142
ENSMUSG00000028478	12757	Clta	clathrin, light polypeptide (Lca) [Source:MGI Symbol;Acc:MGI:894297]	0.974391	7.08145	14.2614	0.000159097	0.000868201	-0.648147	7.08145	6.34433	0.0117757	0.0332052
ENSMUSG00000028479	50798	Gne	glucosamine (UDP-N-acetyl)-2-epimerase/N-acetylmannosamine kinase [Source:MGI Symbol;Acc:MGI:1354951]	0.490724	3.95297	6.12347	0.0133399	0.0326443	-0.41456	3.95297	4.1958	0.0405243	0.0879767
ENSMUSG00000028484	101739	Psip1	PC4 and SFRS1 interacting protein 1 [Source:MGI Symbol;Acc:MGI:2142116]	0.790971	7.51368	13.1983	0.000280205	0.00138533	-0.758607	7.51368	12.0945	0.000505695	0.00260695
ENSMUSG00000028488	20404	Sh3gl2	SH3-domain GRB2-like 2 [Source:MGI Symbol;Acc:MGI:700009]	0.601871	8.65117	6.48731	0.0108647	0.0276397	-0.901241	8.65117	14.3954	0.000148166	0.000951927
ENSMUSG00000028545	67621	Bend5	BEN domain containing 5 [Source:MGI Symbol;Acc:MGI:1914871]	1.85837	3.85375	30.5596	3.23759e-08	6.94509e-07	-0.708854	3.85375	4.46922	0.0345107	0.0777487
ENSMUSG00000028546	15572	Elavl4	ELAV (embryonic lethal, abnormal vision, Drosophila)-like 4 (Hu antigen D) [Source:MGI Symbol;Acc:MGI:107427]	0.825528	7.42845	13.3749	0.000255011	0.00127848	-0.848848	7.42845	14.0642	0.000176677	0.00110095
ENSMUSG00000028609	17149	Magoh	mago homolog, exon junction complex core component [Source:MGI Symbol;Acc:MGI:1330312]	0.803756	5.32672	11.8574	0.000574338	0.0024796	-0.63255	5.32672	7.24962	0.00709159	0.0220548
ENSMUSG00000028622	56280	Mrpl37	mitochondrial ribosomal protein L37 [Source:MGI Symbol;Acc:MGI:1926268]	0.926311	4.81415	21.1795	4.18225e-06	4.2831e-05	-0.479952	4.81415	5.5553	0.0184248	0.0475867
ENSMUSG00000028629	73172	Exo5	exonuclease 5 [Source:MGI Symbol;Acc:MGI:1920422]	0.585576	2.4807	5.66487	0.017308	0.0401745	-0.594798	2.4807	5.3273	0.0209939	0.0526574
ENSMUSG00000028636	106564	Ppcs	phosphopantothenoylcysteine synthetase [Source:MGI Symbol;Acc:MGI:1915237]	0.73174	2.00474	7.73497	0.00541613	0.0157544	-0.645849	2.00474	5.31954	0.0210876	0.0528608
ENSMUSG00000028692	58810	Akr1a1	aldo-keto reductase family 1, member A1 (aldehyde reductase) [Source:MGI Symbol;Acc:MGI:1929955]	0.966504	8.82415	21.9444	2.80658e-06	3.05915e-05	-0.423992	8.82415	4.27689	0.0386339	0.0848167
ENSMUSG00000028719	66588	Cmpk1	cytidine monophosphate (UMP-CMP) kinase 1 [Source:MGI Symbol;Acc:MGI:1913838]	0.91225	6.87638	15.9707	6.43291e-05	0.00041125	-0.7439	6.87638	10.6002	0.00113075	0.00504342
ENSMUSG00000028729	69072	Ebna1bp2	EBNA1 binding protein 2 [Source:MGI Symbol;Acc:MGI:1916322]	0.660659	5.04294	15.0879	0.00010262	0.000602328	-0.446527	5.04294	6.70297	0.00962526	0.0281885
ENSMUSG00000028759	15441	Hp1bp3	heterochromatin protein 1, binding protein 3 [Source:MGI Symbol;Acc:MGI:109369]	0.439032	7.08061	6.68858	0.00970326	0.0252086	-0.727301	7.08061	18.0836	2.11419e-05	0.000193378
ENSMUSG00000028773	14077	Fabp3	fatty acid binding protein 3, muscle and heart [Source:MGI Symbol;Acc:MGI:95476]	1.15731	5.97784	23.6801	1.1375e-06	1.42293e-05	-0.496467	5.97784	4.39804	0.0359803	0.0802404
ENSMUSG00000028779	67898	Pef1	penta-EF hand domain containing 1 [Source:MGI Symbol;Acc:MGI:1915148]	1.00186	5.81192	21.1937	4.15131e-06	4.25922e-05	-0.658488	5.81192	9.1038	0.0025508	0.00962863
ENSMUSG00000028785	15444	Hpca	hippocalcin [Source:MGI Symbol;Acc:MGI:1336200]	0.930763	8.63759	17.4223	2.99295e-05	0.000216595	-0.567844	8.63759	6.54096	0.0105419	0.0303107
ENSMUSG00000028790	20218	Khdrbs1	KH domain containing, RNA binding, signal transduction associated 1 [Source:MGI Symbol;Acc:MGI:893579]	0.612214	5.33607	9.80913	0.00173648	0.00616757	-0.78099	5.33607	15.521	8.15937e-05	0.000583931
ENSMUSG00000028811	107271	Yars	tyrosyl-tRNA synthetase [Source:MGI Symbol;Acc:MGI:2147627]	0.587918	6.54366	12.8144	0.000343968	0.00163411	-0.481081	6.54366	8.49902	0.00355338	0.0125941
ENSMUSG00000028820	71514	Sfpq	splicing factor proline/glutamine rich (polypyrimidine tract binding protein associated) [Source:MGI Symbol;Acc:MGI:1918764]	0.665378	6.76677	7.45758	0.00631698	0.0178757	-0.712224	6.76677	8.48607	0.00357876	0.0126707
ENSMUSG00000028832	16765	Stmn1	stathmin 1 [Source:MGI Symbol;Acc:MGI:96739]	1.28557	6.14258	26.4087	2.76294e-07	4.31951e-06	-0.680232	6.14258	7.47601	0.00625264	0.0199939
ENSMUSG00000028849	245877	Map7d1	MAP7 domain containing 1 [Source:MGI Symbol;Acc:MGI:2384297]	0.720773	6.43763	11.3986	0.000734978	0.00303228	-0.642087	6.43763	8.97645	0.00273482	0.0101906
ENSMUSG00000028863	70088	Meaf6	MYST/Esa1-associated factor 6 [Source:MGI Symbol;Acc:MGI:1917338]	0.652829	5.99826	13.2233	0.000276492	0.00137021	-0.57595	5.99826	10.1461	0.00144604	0.00608718
ENSMUSG00000028869	230737	Gnl2	guanine nucleotide binding protein-like 2 (nucleolar) [Source:MGI Symbol;Acc:MGI:2385207]	0.456508	5.3401	3.95777	0.0466554	0.090208	-0.871254	5.3401	14.0359	0.000179354	0.00111556
ENSMUSG00000028879	100226	Stx12	syntaxin 12 [Source:MGI Symbol;Acc:MGI:1931027]	0.540892	7.29695	9.50614	0.00204786	0.00709037	-0.440429	7.29695	6.2774	0.0122287	0.0342124
ENSMUSG00000028889	230734	Yrdc	yrdC domain containing (E.coli) [Source:MGI Symbol;Acc:MGI:2387201]	0.681807	4.13651	6.30828	0.0120176	0.0300394	-1.08204	4.13651	15.1405	9.97973e-05	0.000689694
ENSMUSG00000028896	100088	Rcc1	regulator of chromosome condensation 1 [Source:MGI Symbol;Acc:MGI:1913989]	0.702659	2.49812	9.0897	0.00257053	0.00856077	-0.541463	2.49812	4.86858	0.02735	0.0648086
ENSMUSG00000028899	66464	Taf12	TATA-box binding protein associated factor 12 [Source:MGI Symbol;Acc:MGI:1913714]	0.574389	4.84324	7.26579	0.00702803	0.0194707	-0.510192	4.84324	5.60382	0.0179213	0.0465804
ENSMUSG00000028902	75062	Sf3a3	splicing factor 3a, subunit 3 [Source:MGI Symbol;Acc:MGI:1922312]	0.678204	4.91303	10.0546	0.00151972	0.00553455	-0.574702	4.91303	7.06157	0.00787551	0.0239985
ENSMUSG00000028932	19181	Psmc2	proteasome (prosome, macropain) 26S subunit, ATPase 2 [Source:MGI Symbol;Acc:MGI:109555]	0.668861	7.38162	12.1672	0.000486377	0.00216624	-0.424273	7.38162	4.89683	0.026906	0.0640483
ENSMUSG00000028945	19744	Rheb	Ras homolog enriched in brain [Source:MGI Symbol;Acc:MGI:97912]	1.25896	6.92566	20.8684	4.91954e-06	4.90637e-05	-0.848306	6.92566	9.57242	0.00197522	0.00783318
ENSMUSG00000028954	53312	Nub1	negative regulator of ubiquitin-like proteins 1 [Source:MGI Symbol;Acc:MGI:1889001]	0.613075	5.69975	11.4937	0.000698321	0.0029068	-0.400429	5.69975	4.837	0.0278553	0.0656742
ENSMUSG00000028974	13347	Dffa	DNA fragmentation factor, alpha subunit [Source:MGI Symbol;Acc:MGI:1196227]	0.468787	5.52887	6.94408	0.00840971	0.0224247	-0.453734	5.52887	6.3876	0.011492	0.0325749
ENSMUSG00000029014	22791	Dnajc2	DnaJ heat shock protein family (Hsp40) member C2 [Source:MGI Symbol;Acc:MGI:99470]	0.855022	4.87235	12.2491	0.000465476	0.00209452	-0.778303	4.87235	9.92288	0.00163237	0.00672304
ENSMUSG00000029038	68991	Ssu72	Ssu72 RNA polymerase II CTD phosphatase homolog (yeast) [Source:MGI Symbol;Acc:MGI:1916241]	1.04824	5.87025	27.0364	1.99657e-07	3.25485e-06	-0.435937	5.87025	4.67854	0.0305417	0.0706495
ENSMUSG00000029088	80334	Kcnip4	Kv channel interacting protein 4 [Source:MGI Symbol;Acc:MGI:1933131]	0.903839	6.5683	14.0617	0.000176913	0.000947545	-0.708419	6.5683	8.62862	0.00330922	0.0118844
ENSMUSG00000029089	66768	5730480H06Rik	RIKEN cDNA 5730480H06 gene [Source:MGI Symbol;Acc:MGI:1917842]	1.00858	2.6169	10.6451	0.00110366	0.00423949	-0.785211	2.6169	6.03485	0.0140262	0.0382584
ENSMUSG00000029121	12933	Crmp1	collapsin response mediator protein 1 [Source:MGI Symbol;Acc:MGI:107793]	0.531777	7.62419	7.09749	0.0077192	0.020953	-0.674978	7.62419	11.3496	0.000754642	0.00363142
ENSMUSG00000029131	23950	Dnajb6	DnaJ heat shock protein family (Hsp40) member B6 [Source:MGI Symbol;Acc:MGI:1344381]	0.890614	4.51602	17.8655	2.37081e-05	0.000178985	-0.74307	4.51602	11.9949	0.000533475	0.00272753
ENSMUSG00000029141	20534	Slc4a1ap	solute carrier family 4 (anion exchanger), member 1, adaptor protein [Source:MGI Symbol;Acc:MGI:1196608]	0.598822	4.12443	6.43404	0.0111954	0.0283544	-0.909677	4.12443	14.1349	0.00017016	0.00106908
ENSMUSG00000029148	192292	Nrbp1	nuclear receptor binding protein 1 [Source:MGI Symbol;Acc:MGI:2183436]	0.636913	5.23798	10.0049	0.0015612	0.00565764	-0.465543	5.23798	5.26097	0.0218089	0.0543038
ENSMUSG00000029166	100732	Mapre3	microtubule-associated protein, RP/EB family, member 3 [Source:MGI Symbol;Acc:MGI:2140967]	0.950808	5.78226	20.2333	6.85477e-06	6.46806e-05	-0.562571	5.78226	7.04767	0.00793683	0.0241327
ENSMUSG00000029169	13204	Dhx15	DEAH (Asp-Glu-Ala-His) box polypeptide 15 [Source:MGI Symbol;Acc:MGI:1099786]	0.348613	6.16977	3.94367	0.0470479	0.090789	-0.731161	6.16977	16.9563	3.82497e-05	0.000314683
ENSMUSG00000029265	13486	Dr1	down-regulator of transcription 1 [Source:MGI Symbol;Acc:MGI:1100515]	0.695051	4.83778	4.34607	0.0370945	0.0748088	-1.05233	4.83778	9.7085	0.00183418	0.00737142
ENSMUSG00000029312	246293	Klhl8	kelch-like 8 [Source:MGI Symbol;Acc:MGI:2179430]	0.47116	5.15017	4.9681	0.025819	0.0556416	-0.627236	5.15017	8.61757	0.00332936	0.011944
ENSMUSG00000029388	209354	Eif2b1	eukaryotic translation initiation factor 2B, subunit 1 (alpha) [Source:MGI Symbol;Acc:MGI:2384802]	0.587493	6.07398	10.7677	0.00103286	0.00402345	-0.479157	6.07398	7.0822	0.00778534	0.0237799
ENSMUSG00000029392	75695	Rilpl1	Rab interacting lysosomal protein-like 1 [Source:MGI Symbol;Acc:MGI:1922945]	0.473502	4.74612	5.72454	0.0167294	0.0391114	-0.820267	4.74612	16.471	4.94011e-05	0.000389611
ENSMUSG00000029397	68098	Rchy1	ring finger and CHY zinc finger domain containing 1 [Source:MGI Symbol;Acc:MGI:1915348]	0.500019	5.52949	4.15535	0.0415032	0.0821247	-0.665244	5.52949	7.24004	0.00712953	0.0221477
ENSMUSG00000029422	208606	Rsrc2	arginine/serine-rich coiled-coil 2 [Source:MGI Symbol;Acc:MGI:1913489]	0.504592	6.95567	7.49126	0.00619992	0.0175979	-0.87193	6.95567	21.9632	2.77936e-06	3.59232e-05
ENSMUSG00000029430	19384	Ran	RAN, member RAS oncogene family [Source:MGI Symbol;Acc:MGI:1333112]	0.781631	5.91179	19.0376	1.28167e-05	0.000108149	-0.573676	5.91179	10.1163	0.00146964	0.00616949
ENSMUSG00000029447	NA	Cct6a	chaperonin containing Tcp1, subunit 6a (zeta) [Source:MGI Symbol;Acc:MGI:107943]	0.697397	6.6679	16.0679	6.11113e-05	0.000393378	-0.624886	6.6679	12.7768	0.000350944	0.00193796
ENSMUSG00000029449	23912	Rhof	ras homolog family member F (in filopodia) [Source:MGI Symbol;Acc:MGI:1345629]	0.613445	5.51667	9.56296	0.00198543	0.00690271	-0.398182	5.51667	3.98145	0.046004	0.0977812
ENSMUSG00000029462	56433	Vps29	VPS29 retromer complex component [Source:MGI Symbol;Acc:MGI:1928344]	1.18634	8.3252	25.3429	4.79922e-07	6.95825e-06	-0.587923	8.3252	6.33553	0.0118343	0.0333255
ENSMUSG00000029463	68948	Fam216a	family with sequence similarity 216, member A [Source:MGI Symbol;Acc:MGI:1916198]	1.22216	3.93889	19.3984	1.06095e-05	9.26465e-05	-0.810007	3.93889	8.28542	0.00399647	0.0138715
ENSMUSG00000029464	68080	Gpn3	GPN-loop GTPase 3 [Source:MGI Symbol;Acc:MGI:1289326]	0.59664	4.02273	6.1988	0.0127837	0.0315363	-0.516219	4.02273	4.50089	0.0338773	0.0766202
ENSMUSG00000029465	56378	Arpc3	actin related protein 2/3 complex, subunit 3 [Source:MGI Symbol;Acc:MGI:1928375]	0.795124	8.07142	13.5142	0.000236765	0.00120319	-0.425383	8.07142	3.892	0.0485165	0.102142
ENSMUSG00000029474	80751	Rnf34	ring finger protein 34 [Source:MGI Symbol;Acc:MGI:2153340]	0.547439	6.24253	6.93744	0.00844098	0.0224865	-0.672066	6.24253	10.3203	0.00131578	0.00567116
ENSMUSG00000029500	72542	Pgam5	phosphoglycerate mutase family member 5 [Source:MGI Symbol;Acc:MGI:1919792]	0.501938	3.23899	4.19216	0.0406114	0.0806029	-0.716478	3.23899	8.04823	0.0045548	0.0154795
ENSMUSG00000029535	69076	Triap1	TP53 regulated inhibitor of apoptosis 1 [Source:MGI Symbol;Acc:MGI:1916326]	0.872121	5.42563	13.8566	0.000197299	0.00103731	-0.653911	5.42563	7.70937	0.00549349	0.0180022
ENSMUSG00000029536	384281	Gatc	glutamyl-tRNA(Gln) amidotransferase, subunit C [Source:MGI Symbol;Acc:MGI:1923776]	0.491752	4.76626	5.74703	0.0165166	0.0386963	-0.849102	4.76626	16.4728	4.93543e-05	0.000389425
ENSMUSG00000029559	72357	2210016L21Rik	RIKEN cDNA 2210016L21 gene [Source:MGI Symbol;Acc:MGI:1919607]	1.10926	6.78347	27.4356	1.6241e-07	2.75036e-06	-0.596882	6.78347	8.00599	0.00466229	0.0157427
ENSMUSG00000029581	14086	Fscn1	fascin actin-bundling protein 1 [Source:MGI Symbol;Acc:MGI:1352745]	0.867428	5.58603	16.8512	4.04275e-05	0.000277484	-0.612517	5.58603	8.29113	0.00398392	0.0138395
ENSMUSG00000029591	22256	Ung	uracil DNA glycosylase [Source:MGI Symbol;Acc:MGI:109352]	1.06863	1.92232	16.5907	4.63778e-05	0.000312194	-1.24592	1.92232	18.0836	2.11416e-05	0.000193378
ENSMUSG00000029618	18261	Ocm	oncomodulin [Source:MGI Symbol;Acc:MGI:97401]	1.81384	1.57597	26.3174	2.89671e-07	4.49097e-06	-1.21991	1.57597	9.7384	0.00180458	0.0072661
ENSMUSG00000029627	67235	Zkscan14	zinc finger with KRAB and SCAN domains 14 [Source:MGI Symbol;Acc:MGI:1914485]	0.719137	3.34729	10.0252	0.00154412	0.00560664	-0.687572	3.34729	8.56838	0.00342052	0.0122197
ENSMUSG00000029634	74132	Rnf6	ring finger protein (C3H2C3 type) 6 [Source:MGI Symbol;Acc:MGI:1921382]	0.433734	5.73439	5.15116	0.0232308	0.0510677	-0.750925	5.73439	15.0951	0.000102229	0.000701671
ENSMUSG00000029657	15505	Hsph1	heat shock 105kDa/110kDa protein 1 [Source:MGI Symbol;Acc:MGI:105053]	0.596386	7.8791	4.24283	0.0394165	0.0786051	-0.970171	7.8791	11.0793	0.000872946	0.00409156
ENSMUSG00000029659	70717	Medag	mesenteric estrogen dependent adipogenesis [Source:MGI Symbol;Acc:MGI:1917967]	0.771681	2.95645	7.23381	0.00715432	0.0197489	-0.892719	2.95645	9.0342	0.00264975	0.0099262
ENSMUSG00000029681	12054	Bcl7b	B cell CLL/lymphoma 7B [Source:MGI Symbol;Acc:MGI:1332238]	0.590803	3.81786	8.842	0.00294376	0.00956451	-0.532417	3.81786	6.81222	0.00905361	0.0268519
ENSMUSG00000029712	83766	Actl6b	actin-like 6B [Source:MGI Symbol;Acc:MGI:1933548]	1.03206	5.42544	26.4673	2.68044e-07	4.21014e-06	-0.422568	5.42544	4.40629	0.0358066	0.080002
ENSMUSG00000029713	14693	Gnb2	guanine nucleotide binding protein (G protein), beta 2 [Source:MGI Symbol;Acc:MGI:95784]	0.948265	5.8824	20.1917	7.00549e-06	6.58728e-05	-0.480981	5.8824	5.17928	0.0228578	0.0563313
ENSMUSG00000029722	231801	Agfg2	ArfGAP with FG repeats 2 [Source:MGI Symbol;Acc:MGI:2443267]	0.48166	4.71672	5.64166	0.0175386	0.0406198	-0.681349	4.71672	10.8886	0.000967566	0.00442863
ENSMUSG00000029726	231803	Mepce	methylphosphate capping enzyme [Source:MGI Symbol;Acc:MGI:106477]	0.774604	4.94151	11.7417	0.000611155	0.00260736	-0.575012	4.94151	6.34587	0.0117655	0.0331876
ENSMUSG00000029752	27053	Asns	asparagine synthetase [Source:MGI Symbol;Acc:MGI:1350929]	0.743659	7.21644	12.9772	0.000315299	0.00152513	-0.582574	7.21644	7.95163	0.0048044	0.0161317
ENSMUSG00000029757	13426	Dync1i1	dynein cytoplasmic 1 intermediate chain 1 [Source:MGI Symbol;Acc:MGI:107743]	0.67536	7.1649	6.64601	0.00993781	0.0256946	-0.658188	7.1649	6.29408	0.0121142	0.0339485
ENSMUSG00000029769	232664	Ccdc136	coiled-coil domain containing 136 [Source:MGI Symbol;Acc:MGI:1918128]	0.86567	6.03756	15.4275	8.57335e-05	0.000518717	-0.460696	6.03756	4.36056	0.0367801	0.081723
ENSMUSG00000029777	353172	Gars	glycyl-tRNA synthetase [Source:MGI Symbol;Acc:MGI:2449057]	0.704285	7.03129	13.939	0.000188843	0.000998374	-0.516792	7.03129	7.48432	0.00622385	0.019917
ENSMUSG00000029840	14489	Mtpn	myotrophin [Source:MGI Symbol;Acc:MGI:99445]	0.603061	8.62498	6.65441	0.00989106	0.0256053	-0.54463	8.62498	5.42625	0.0198363	0.0503485
ENSMUSG00000029910	56150	Mad2l1	MAD2 mitotic arrest deficient-like 1 [Source:MGI Symbol;Acc:MGI:1860374]	0.614082	3.46656	5.663	0.0173265	0.0401897	-0.67503	3.46656	6.52529	0.0106351	0.0305539
ENSMUSG00000029911	381760	Ssbp1	single-stranded DNA binding protein 1 [Source:MGI Symbol;Acc:MGI:1920040]	0.532956	4.36026	7.55219	0.00599372	0.0171182	-0.494202	4.36026	6.2623	0.0123334	0.034465
ENSMUSG00000029922	54484	Mkrn1	makorin, ring finger protein, 1 [Source:MGI Symbol;Acc:MGI:1859353]	0.592588	7.28933	8.92045	0.00281995	0.00924069	-0.543447	7.28933	7.4707	0.00627112	0.0200339
ENSMUSG00000030045	56284	Mrpl19	mitochondrial ribosomal protein L19 [Source:MGI Symbol;Acc:MGI:1926274]	0.948475	5.42861	27.2531	1.78486e-07	2.97033e-06	-0.383437	5.42861	4.40277	0.0358807	0.0800823
ENSMUSG00000030051	72103	Aplf	aprataxin and PNKP like factor [Source:MGI Symbol;Acc:MGI:1919353]	0.555692	1.6977	3.9505	0.0468573	0.0904968	-0.625487	1.6977	4.42489	0.0354184	0.0793567
ENSMUSG00000030057	12785	Cnbp	cellular nucleic acid binding protein [Source:MGI Symbol;Acc:MGI:88431]	0.802904	9.02284	11.7609	0.000604881	0.00258673	-0.554235	9.02284	5.63411	0.0176143	0.0459819
ENSMUSG00000030061	22200	Uba3	ubiquitin-like modifier activating enzyme 3 [Source:MGI Symbol;Acc:MGI:1341217]	0.408993	5.89971	5.39399	0.0202063	0.0456758	-0.436106	5.89971	6.04566	0.0139405	0.038062
ENSMUSG00000030103	20893	Bhlhe40	basic helix-loop-helix family, member e40 [Source:MGI Symbol;Acc:MGI:1097714]	0.9631	6.88576	11.7934	0.000594403	0.00255016	-0.955589	6.88576	11.5567	0.000675074	0.00330735
ENSMUSG00000030120	30853	Mlf2	myeloid leukemia factor 2 [Source:MGI Symbol;Acc:MGI:1353554]	0.775184	7.29458	9.6247	0.00191977	0.00669944	-0.646253	7.29458	6.6861	0.00971673	0.0284266
ENSMUSG00000030122	69202	Ptms	parathymosin [Source:MGI Symbol;Acc:MGI:1916452]	0.964169	6.40849	11.866	0.000571682	0.00247037	-0.685259	6.40849	6.0085	0.0142371	0.0387251
ENSMUSG00000030127	26894	Cops7a	COP9 signalosome subunit 7A [Source:MGI Symbol;Acc:MGI:1349400]	1.09975	7.02508	40.6843	1.78919e-10	8.43082e-09	-0.379529	7.02508	4.89546	0.0269274	0.0640794
ENSMUSG00000030161	57436	Gabarapl1	gamma-aminobutyric acid (GABA) A receptor-associated protein-like 1 [Source:MGI Symbol;Acc:MGI:1914980]	1.11677	8.83285	21.785	3.0498e-06	3.27531e-05	-0.618715	8.83285	6.78678	0.00918356	0.0271844
ENSMUSG00000030188	66441	Magohb	mago homolog B, exon junction complex core component [Source:MGI Symbol;Acc:MGI:1913691]	0.587134	3.22221	6.05376	0.0138767	0.0337024	-0.834909	3.22221	11.3302	0.000762551	0.00366422
ENSMUSG00000030204	67755	Ddx47	DEAD (Asp-Glu-Ala-Asp) box polypeptide 47 [Source:MGI Symbol;Acc:MGI:1915005]	0.424686	6.24907	5.12144	0.023632	0.0517798	-0.520349	6.24907	7.59897	0.00584015	0.0189348
ENSMUSG00000030216	60321	Wbp11	WW domain binding protein 11 [Source:MGI Symbol;Acc:MGI:1891823]	0.919146	6.00114	15.8217	6.95987e-05	0.000439412	-0.723758	6.00114	9.74457	0.00179853	0.00724728
ENSMUSG00000030224	20901	Strap	serine/threonine kinase receptor associated protein [Source:MGI Symbol;Acc:MGI:1329037]	0.738517	7.13594	11.1189	0.000854521	0.00343015	-0.838736	7.13594	14.2098	0.000163519	0.00103307
ENSMUSG00000030264	14911	Thumpd3	THUMP domain containing 3 [Source:MGI Symbol;Acc:MGI:1277973]	0.442961	4.93205	6.426	0.0112462	0.0284507	-0.517876	4.93205	8.50836	0.00353519	0.0125509
ENSMUSG00000030268	12035	Bcat1	branched chain aminotransferase 1, cytosolic [Source:MGI Symbol;Acc:MGI:104861]	0.361983	6.56616	4.77943	0.0288016	0.0607732	-0.522113	6.56616	9.8125	0.00173329	0.00704702
ENSMUSG00000030291	108098	Med21	mediator complex subunit 21 [Source:MGI Symbol;Acc:MGI:1347064]	0.59342	5.88234	7.92174	0.00488442	0.0145225	-0.638958	5.88234	9.0591	0.00261391	0.00982044
ENSMUSG00000030316	68971	Tamm41	TAM41 mitochondrial translocator assembly and maintenance homolog [Source:MGI Symbol;Acc:MGI:1916221]	0.509677	2.76871	5.16571	0.023037	0.0507546	-0.582613	2.76871	6.18248	0.0129021	0.0357858
ENSMUSG00000030323	81896	Ift122	intraflagellar transport 122 [Source:MGI Symbol;Acc:MGI:1932386]	0.492706	4.95083	6.10248	0.0134992	0.0329861	-0.419199	4.95083	4.32862	0.0374766	0.0828834
ENSMUSG00000030327	67602	Necap1	NECAP endocytosis associated 1 [Source:MGI Symbol;Acc:MGI:1914852]	1.00706	7.97213	19.8019	8.58959e-06	7.79288e-05	-0.930962	7.97213	16.9055	3.92884e-05	0.000321965
ENSMUSG00000030346	19362	Rad51ap1	RAD51 associated protein 1 [Source:MGI Symbol;Acc:MGI:1098224]	0.754054	1.75366	4.81643	0.0281896	0.059677	-0.816568	1.75366	5.14689	0.0232881	0.0572224
ENSMUSG00000030347	28040	D6Wsu163e	DNA segment, Chr 6, Wayne State University 163, expressed [Source:MGI Symbol;Acc:MGI:107893]	0.557921	4.86135	8.95849	0.00276184	0.00908249	-0.629052	4.86135	11.0021	0.000910067	0.00422657
ENSMUSG00000030350	381813	Prmt8	protein arginine N-methyltransferase 8 [Source:MGI Symbol;Acc:MGI:3043083]	0.45929	6.63748	5.32055	0.0210754	0.0473216	-0.771505	6.63748	14.7771	0.000120999	0.000808025
ENSMUSG00000030357	14228	Fkbp4	FK506 binding protein 4 [Source:MGI Symbol;Acc:MGI:95543]	0.857555	6.51334	23.414	1.30622e-06	1.60144e-05	-0.406672	6.51334	5.26211	0.0217946	0.0542842
ENSMUSG00000030374	97387	Strn4	striatin, calmodulin binding protein 4 [Source:MGI Symbol;Acc:MGI:2142346]	0.562546	7.19553	7.4325	0.00640562	0.0180808	-0.405314	7.19553	3.84953	0.0497598	0.104067
ENSMUSG00000030515	272396	Tarsl2	threonyl-tRNA synthetase-like 2 [Source:MGI Symbol;Acc:MGI:2444486]	0.525993	5.01763	4.82247	0.028091	0.0595134	-0.98429	5.01763	16.3127	5.37021e-05	0.000416675
ENSMUSG00000030519	11784	Apba2	amyloid beta (A4) precursor protein-binding, family A, member 2 [Source:MGI Symbol;Acc:MGI:1261791]	0.592511	6.36851	8.81674	0.0029848	0.00967722	-0.619425	6.36851	9.52801	0.00202359	0.0079942
ENSMUSG00000030584	29861	Dpf1	D4, zinc and double PHD fingers family 1 [Source:MGI Symbol;Acc:MGI:1352748]	0.618145	4.86665	9.83878	0.00170871	0.00608439	-0.493257	4.86665	6.11692	0.0133894	0.0368331
ENSMUSG00000030619	13626	Eed	embryonic ectoderm development [Source:MGI Symbol;Acc:MGI:95286]	0.548027	4.00271	7.32711	0.00679221	0.0189615	-0.449417	4.00271	4.72362	0.029751	0.0691366
ENSMUSG00000030629	65098	Zfand6	zinc finger, AN1-type domain 6 [Source:MGI Symbol;Acc:MGI:1929510]	0.468838	6.40928	5.72279	0.0167461	0.0391357	-0.581881	6.40928	8.71624	0.00315389	0.011469
ENSMUSG00000030663	56372	1110004F10Rik	RIKEN cDNA 1110004F10 gene [Source:MGI Symbol;Acc:MGI:1929274]	0.792684	7.38596	10.1547	0.0014393	0.00529365	-0.508869	7.38596	4.20099	0.0404004	0.0877985
ENSMUSG00000030685	233877	Kctd13	potassium channel tetramerisation domain containing 13 [Source:MGI Symbol;Acc:MGI:1923739]	0.888283	6.30649	11.3534	0.0007531	0.00308957	-0.57054	6.30649	4.69271	0.0302909	0.0701707
ENSMUSG00000030714	75565	Sgf29	SAGA complex associated factor 29 [Source:MGI Symbol;Acc:MGI:1922815]	0.476058	4.24373	5.46344	0.0194184	0.0441625	-0.45071	4.24373	4.74059	0.029459	0.0685839
ENSMUSG00000030751	26440	Psma1	proteasome (prosome, macropain) subunit, alpha type 1 [Source:MGI Symbol;Acc:MGI:1347005]	0.620191	7.50077	10.5653	0.00115228	0.00440007	-0.648217	7.50077	11.4735	0.000705956	0.00343159
ENSMUSG00000030763	30949	Lcmt1	leucine carboxyl methyltransferase 1 [Source:MGI Symbol;Acc:MGI:1353593]	0.954861	6.5297	24.2154	8.61423e-07	1.1263e-05	-0.624316	6.5297	10.3319	0.00130753	0.00564577
ENSMUSG00000030774	18479	Pak1	p21 protein (Cdc42/Rac)-activated kinase 1 [Source:MGI Symbol;Acc:MGI:1339975]	1.00405	9.2953	16.8319	4.08411e-05	0.000279751	-0.87824	9.2953	12.9207	0.000324972	0.00181774
ENSMUSG00000030779	19647	Rbbp6	retinoblastoma binding protein 6, ubiquitin ligase [Source:MGI Symbol;Acc:MGI:894835]	0.448209	6.17472	5.44709	0.019601	0.0445356	-0.603514	6.17472	9.73759	0.00180537	0.0072661
ENSMUSG00000030801	67773	Kat8	K(lysine) acetyltransferase 8 [Source:MGI Symbol;Acc:MGI:1915023]	0.540603	4.0188	6.39184	0.0114646	0.0289114	-0.742443	4.0188	11.4699	0.000707331	0.00343728
ENSMUSG00000030868	59288	Dctn5	dynactin 5 [Source:MGI Symbol;Acc:MGI:1891689]	0.697182	7.42729	12.0842	0.000508499	0.00223886	-0.677907	7.42729	11.3715	0.000745808	0.0035951
ENSMUSG00000030869	70316	Ndufab1	NADH dehydrogenase (ubiquinone) 1, alpha/beta subcomplex, 1 [Source:MGI Symbol;Acc:MGI:1917566]	0.639095	4.27696	6.78981	0.00916799	0.0240678	-0.578327	4.27696	5.40707	0.0200553	0.050843
ENSMUSG00000030881	76932	Arfip2	ADP-ribosylation factor interacting protein 2 [Source:MGI Symbol;Acc:MGI:1924182]	0.902381	6.57978	23.2919	1.39182e-06	1.68819e-05	-0.551007	6.57978	8.66349	0.00324649	0.0117168
ENSMUSG00000030922	73919	Lyrm1	LYR motif containing 1 [Source:MGI Symbol;Acc:MGI:1921169]	1.04893	3.85683	11.0868	0.000869428	0.00347668	-0.83835	3.85683	6.90674	0.00858714	0.0257415
ENSMUSG00000030942	233802	Thumpd1	THUMP domain containing 1 [Source:MGI Symbol;Acc:MGI:2444479]	0.700284	5.21861	8.89288	0.00286284	0.00935415	-0.892553	5.21861	14.0825	0.000174964	0.00109312
ENSMUSG00000030960	72096	Mettl10	methyltransferase like 10 [Source:MGI Symbol;Acc:MGI:1919346]	0.805388	4.65729	12.3357	0.000444371	0.00201468	-0.493826	4.65729	4.55222	0.032876	0.0748501
ENSMUSG00000030979	22276	Uros	uroporphyrinogen III synthase [Source:MGI Symbol;Acc:MGI:98917]	0.622699	5.06209	11.7237	0.000617077	0.00262365	-0.604163	5.06209	10.7253	0.00105681	0.00476304
ENSMUSG00000030983	66165	Bccip	BRCA2 and CDKN1A interacting protein [Source:MGI Symbol;Acc:MGI:1913415]	0.6905	5.73771	10.7226	0.00105835	0.00409828	-0.664112	5.73771	9.77021	0.00177362	0.00716927
ENSMUSG00000031016	22390	Wee1	WEE 1 homolog 1 (S. pombe) [Source:MGI Symbol;Acc:MGI:103075]	0.554692	2.24397	4.00428	0.0453849	0.0883319	-0.916413	2.24397	9.81576	0.00173023	0.00703954
ENSMUSG00000031078	13043	Cttn	cortactin [Source:MGI Symbol;Acc:MGI:99695]	0.751056	6.27084	17.9865	2.22472e-05	0.00016948	-0.553851	6.27084	9.68399	0.00185881	0.00746148
ENSMUSG00000031104	19337	Rab33a	RAB33A, member RAS oncogene family [Source:MGI Symbol;Acc:MGI:109493]	0.872369	5.91245	15.2112	9.61293e-05	0.000570417	-0.595379	5.91245	7.05014	0.00792589	0.0241126
ENSMUSG00000031107	209003	Rbmx2	RNA binding motif protein, X-linked 2 [Source:MGI Symbol;Acc:MGI:1919414]	0.764426	3.22503	6.74703	0.00939041	0.0245441	-0.698819	3.22503	5.38321	0.0203315	0.0513182
ENSMUSG00000031153	54645	Gripap1	GRIP1 associated protein 1 [Source:MGI Symbol;Acc:MGI:1859616]	0.544469	5.99898	7.96244	0.00477581	0.0142501	-0.470785	5.99898	5.89294	0.0152017	0.0407883
ENSMUSG00000031154	54644	Otud5	OTU domain containing 5 [Source:MGI Symbol;Acc:MGI:1859615]	0.666033	5.41481	12.9183	0.000325385	0.00156279	-0.516894	5.41481	7.62316	0.00576234	0.0187198
ENSMUSG00000031155	NA	Pim2	proviral integration site 2 [Source:MGI Symbol;Acc:MGI:97587]	0.827232	4.88457	12.1922	0.0004799	0.00214675	-0.831125	4.88457	11.9999	0.000532024	0.00272094
ENSMUSG00000031176	67117	Dynlt3	dynein light chain Tctex-type 3 [Source:MGI Symbol;Acc:MGI:1914367]	0.958174	8.18549	24.3633	7.97733e-07	1.05786e-05	-0.411199	8.18549	4.53769	0.0331563	0.0753757
ENSMUSG00000031197	22327	Vbp1	von Hippel-Lindau binding protein 1 [Source:MGI Symbol;Acc:MGI:1333804]	0.568529	6.61459	5.41355	0.019981	0.0452887	-0.708226	6.61459	8.31886	0.00392356	0.013675
ENSMUSG00000031242	67028	2610002M06Rik	RIKEN cDNA 2610002M06 gene [Source:MGI Symbol;Acc:MGI:1914278]	0.363638	5.49946	3.89634	0.0483916	0.0928266	-0.787017	5.49946	17.7254	2.55193e-05	0.000226023
ENSMUSG00000031323	70887	Dmrtc1a	DMRT-like family C1a [Source:MGI Symbol;Acc:MGI:1918137]	0.750731	2.09319	4.12226	0.0423226	0.0834072	-0.89028	2.09319	5.38985	0.0202543	0.051154
ENSMUSG00000031353	245688	Rbbp7	retinoblastoma binding protein 7, chromatin remodeling factor [Source:MGI Symbol;Acc:MGI:1194910]	0.487365	6.82772	8.27206	0.00402598	0.0124101	-0.710345	6.82772	17.3002	3.19161e-05	0.000271498
ENSMUSG00000031370	22184	Zrsr2	zinc finger (CCCH type), RNA binding motif and serine/arginine rich 2 [Source:MGI Symbol;Acc:MGI:103287]	0.982331	5.54257	17.4985	2.87538e-05	0.00020987	-0.708455	5.54257	9.02666	0.0026607	0.00996499
ENSMUSG00000031409	66104	Tceal6	transcription elongation factor A (SII)-like 6 [Source:MGI Symbol;Acc:MGI:1923939]	1.00362	3.79641	13.8407	0.000198981	0.00104329	-0.854118	3.79641	9.63815	0.00190577	0.00761172
ENSMUSG00000031422	56397	Morf4l2	mortality factor 4 like 2 [Source:MGI Symbol;Acc:MGI:1927167]	1.04737	7.23353	26.1777	3.11391e-07	4.77476e-06	-0.793641	7.23353	15.0528	0.000104543	0.000713764
ENSMUSG00000031428	66995	Zcchc18	zinc finger, CCHC domain containing 18 [Source:MGI Symbol;Acc:MGI:1914245]	0.581771	8.961	6.4319	0.0112089	0.0283689	-0.822946	8.961	12.7674	0.000352717	0.00194505
ENSMUSG00000031432	19139	Prps1	phosphoribosyl pyrophosphate synthetase 1 [Source:MGI Symbol;Acc:MGI:97775]	0.689675	6.94916	11.9409	0.000549155	0.00239151	-0.752056	6.94916	14.0706	0.000176075	0.00109802
ENSMUSG00000031485	114863	Prosc	proline synthetase co-transcribed [Source:MGI Symbol;Acc:MGI:1891207]	0.599553	5.67219	10.5836	0.00114096	0.0043608	-0.617477	5.67219	11.0132	0.00090465	0.00420791
ENSMUSG00000031516	22428	Dctn6	dynactin 6 [Source:MGI Symbol;Acc:MGI:1343154]	0.877615	6.82451	15.4886	8.30061e-05	0.000504868	-0.562356	6.82451	6.37318	0.0115858	0.0327853
ENSMUSG00000031530	319520	Dusp4	dual specificity phosphatase 4 [Source:MGI Symbol;Acc:MGI:2442191]	0.855199	0.452366	5.58271	0.0181386	0.0417845	-0.828556	0.452366	4.12489	0.0422568	0.0910659
ENSMUSG00000031533	57312	Mrps31	mitochondrial ribosomal protein S31 [Source:MGI Symbol;Acc:MGI:1913153]	0.802858	4.7399	14.4453	0.000144292	0.000801488	-0.511524	4.7399	5.72168	0.0167567	0.0441
ENSMUSG00000031536	18970	Polb	polymerase (DNA directed), beta [Source:MGI Symbol;Acc:MGI:97740]	0.738676	5.88823	16.7218	4.32813e-05	0.000293826	-0.514447	5.88823	8.01559	0.00463765	0.015688
ENSMUSG00000031539	64933	Ap3m2	adaptor-related protein complex 3, mu 2 subunit [Source:MGI Symbol;Acc:MGI:1929214]	0.546553	7.15942	8.86098	0.00291331	0.00949132	-0.666862	7.15942	13.0651	0.000300845	0.00170586
ENSMUSG00000031546	109145	Gins4	GINS complex subunit 4 (Sld5 homolog) [Source:MGI Symbol;Acc:MGI:1923847]	0.998296	3.71397	18.2913	1.89571e-05	0.000147978	-0.554838	3.71397	5.39951	0.0201424	0.0509713
ENSMUSG00000031585	68153	Gtf2e2	general transcription factor II E, polypeptide 2 (beta subunit) [Source:MGI Symbol;Acc:MGI:1915403]	1.0481	4.61883	17.7162	2.56436e-05	0.000190783	-0.724166	4.61883	8.30213	0.00395987	0.0137794
ENSMUSG00000031601	18983	Cnot7	CCR4-NOT transcription complex, subunit 7 [Source:MGI Symbol;Acc:MGI:1298230]	0.349249	6.03332	3.87466	0.0490203	0.0938609	-0.798017	6.03332	19.7196	8.96774e-06	9.50308e-05
ENSMUSG00000031634	192169	Ufsp2	UFM1-specific peptidase 2 [Source:MGI Symbol;Acc:MGI:1913679]	0.622417	6.41922	10.4636	0.00121748	0.00460708	-0.430452	6.41922	4.97664	0.0256918	0.0618159
ENSMUSG00000031696	65114	Vps35	VPS35 retromer complex component [Source:MGI Symbol;Acc:MGI:1890467]	0.569946	7.90644	11.0624	0.000880966	0.00351527	-0.459064	7.90644	7.16208	0.00744607	0.0229189
ENSMUSG00000031697	56452	Orc6	origin recognition complex, subunit 6 [Source:MGI Symbol;Acc:MGI:1929285]	0.771584	5.85672	11.2686	0.000788278	0.00321267	-0.539168	5.85672	5.47147	0.0193293	0.0493906
ENSMUSG00000031698	213435	Mylk3	myosin light chain kinase 3 [Source:MGI Symbol;Acc:MGI:2443063]	0.687655	2.46398	4.59122	0.0321362	0.0665455	-0.947211	2.46398	8.0663	0.0045096	0.0153445
ENSMUSG00000031701	56445	Dnaja2	DnaJ heat shock protein family (Hsp40) member A2 [Source:MGI Symbol;Acc:MGI:1931882]	0.812879	7.77381	16.2048	5.68513e-05	0.000370794	-0.692116	7.77381	11.7372	0.000612627	0.00305519
ENSMUSG00000031711	30932	Zfp330	zinc finger protein 330 [Source:MGI Symbol;Acc:MGI:1353574]	0.552477	5.10228	8.15972	0.00428309	0.0130137	-0.514974	5.10228	6.93308	0.00846159	0.0254242
ENSMUSG00000031728	75871	Zfp821	zinc finger protein 821 [Source:MGI Symbol;Acc:MGI:1923121]	0.595086	3.63658	7.58739	0.00587779	0.0168605	-0.485217	3.63658	4.81111	0.0282768	0.0664113
ENSMUSG00000031782	67914	Coq9	coenzyme Q9 [Source:MGI Symbol;Acc:MGI:1915164]	0.783568	6.03352	19.6377	9.36036e-06	8.34769e-05	-0.428951	6.03352	5.83862	0.0156781	0.0418125
ENSMUSG00000031783	20021	Polr2c	polymerase (RNA) II (DNA directed) polypeptide C [Source:MGI Symbol;Acc:MGI:109299]	0.52793	4.38569	8.52993	0.00349353	0.0110407	-0.4431	4.38569	5.78354	0.016177	0.0428973
ENSMUSG00000031913	116733	Vps4a	vacuolar protein sorting 4A [Source:MGI Symbol;Acc:MGI:1890520]	0.683263	6.70626	8.36579	0.0038235	0.0118864	-0.688073	6.70626	8.42937	0.00369208	0.013006
ENSMUSG00000031916	97484	Cog8	component of oligomeric golgi complex 8 [Source:MGI Symbol;Acc:MGI:2142885]	0.640678	2.71332	6.22862	0.0125702	0.0311332	-0.58936	2.71332	4.86293	0.0274398	0.0649732
ENSMUSG00000031917	66164	Nip7	NIP7, nucleolar pre-rRNA processing protein [Source:MGI Symbol;Acc:MGI:1913414]	0.729774	5.8504	17.309	3.17672e-05	0.000227054	-0.72452	5.8504	16.6994	4.37937e-05	0.000354385
ENSMUSG00000031921	21750	Terf2	telomeric repeat binding factor 2 [Source:MGI Symbol;Acc:MGI:1195972]	0.641365	5.37034	13.215	0.000277711	0.00137544	-0.544465	5.37034	9.30997	0.0022791	0.00882547
ENSMUSG00000031955	12927	Bcar1	breast cancer anti-estrogen resistance 1 [Source:MGI Symbol;Acc:MGI:108091]	0.487042	3.53615	5.00735	0.0252399	0.0545903	-0.515225	3.53615	5.30962	0.0212079	0.0530954
ENSMUSG00000032051	14148	Fdx1	ferredoxin 1 [Source:MGI Symbol;Acc:MGI:103224]	0.593618	2.19185	4.93945	0.0262504	0.0563901	-0.869031	2.19185	9.34628	0.00223439	0.00868439
ENSMUSG00000032062	66952	2310030G06Rik	RIKEN cDNA 2310030G06 gene [Source:MGI Symbol;Acc:MGI:1914202]	0.646958	1.54357	4.80058	0.0284502	0.0601376	-1.06175	1.54357	10.9616	0.000930217	0.00429282
ENSMUSG00000032077	215051	Bud13	BUD13 homolog [Source:MGI Symbol;Acc:MGI:2443443]	0.423026	3.1534	4.09072	0.0431192	0.0846291	-0.609537	3.1534	7.88664	0.00498014	0.0165853
ENSMUSG00000032101	30959	Ddx25	DEAD (Asp-Glu-Ala-Asp) box polypeptide 25 [Source:MGI Symbol;Acc:MGI:1353582]	0.539975	5.57896	6.91473	0.00854884	0.022734	-0.778556	5.57896	14.03	0.000179922	0.00111868
ENSMUSG00000032184	70082	Lysmd2	LysM, putative peptidoglycan-binding, domain containing 2 [Source:MGI Symbol;Acc:MGI:1917332]	1.01102	5.4975	17.1003	3.54566e-05	0.000249595	-0.820043	5.4975	11.1237	0.000852316	0.0040083
ENSMUSG00000032192	14697	Gnb5	guanine nucleotide binding protein (G protein), beta 5 [Source:MGI Symbol;Acc:MGI:101848]	0.945934	5.87524	15.7046	7.4045e-05	0.000461406	-0.687195	5.87524	8.25824	0.00405674	0.0140632
ENSMUSG00000032215	225215	Rsl24d1	ribosomal L24 domain containing 1 [Source:MGI Symbol;Acc:MGI:2681840]	0.656492	5.44014	8.86012	0.00291469	0.00949211	-0.532514	5.44014	5.75103	0.016479	0.0435605
ENSMUSG00000032251	65099	Irak1bp1	interleukin-1 receptor-associated kinase 1 binding protein 1 [Source:MGI Symbol;Acc:MGI:1929475]	0.556363	4.57776	4.1976	0.0404813	0.0803924	-0.861379	4.57776	9.77482	0.00176918	0.00715823
ENSMUSG00000032279	67834	Idh3a	isocitrate dehydrogenase 3 (NAD+) alpha [Source:MGI Symbol;Acc:MGI:1915084]	0.655509	8.58361	11.6731	0.000634095	0.00268406	-0.64236	8.58361	11.1865	0.000823957	0.00390338
ENSMUSG00000032285	58233	Dnaja4	DnaJ heat shock protein family (Hsp40) member A4 [Source:MGI Symbol;Acc:MGI:1927638]	0.891101	1.80453	8.62747	0.00331132	0.0105684	-0.728994	1.80453	5.13578	0.0234375	0.0575306
ENSMUSG00000032288	102462	Imp3	IMP3, U3 small nucleolar ribonucleoprotein [Source:MGI Symbol;Acc:MGI:1916119]	0.945791	4.6698	13.819	0.000201295	0.00105292	-0.653748	4.6698	6.49506	0.0108174	0.0309875
ENSMUSG00000032306	110119	Mpi	mannose phosphate isomerase [Source:MGI Symbol;Acc:MGI:97075]	0.516313	6.73016	8.19454	0.00420165	0.0128337	-0.359407	6.73016	3.95151	0.0468293	0.0992622
ENSMUSG00000032309	71999	Fbxo22	F-box protein 22 [Source:MGI Symbol;Acc:MGI:1926014]	0.546828	4.43839	7.7715	0.00530771	0.0154866	-0.485047	4.43839	5.91832	0.0149843	0.0403533
ENSMUSG00000032366	22003	Tpm1	tropomyosin 1, alpha [Source:MGI Symbol;Acc:MGI:98809]	0.583051	7.53576	10.1134	0.00147198	0.0053855	-0.695504	7.53576	14.2711	0.000158273	0.00100493
ENSMUSG00000032382	56440	Snx1	sorting nexin 1 [Source:MGI Symbol;Acc:MGI:1928395]	0.43052	5.58602	5.99058	0.0143825	0.0346946	-0.529028	5.58602	8.85739	0.00291905	0.0107549
ENSMUSG00000032417	69519	Rwdd2a	RWD domain containing 2A [Source:MGI Symbol;Acc:MGI:1916769]	1.23943	5.62428	20.1977	6.98385e-06	6.57061e-05	-0.541009	5.62428	3.89179	0.0485227	0.102142
ENSMUSG00000032459	64655	Mrps22	mitochondrial ribosomal protein S22 [Source:MGI Symbol;Acc:MGI:1928137]	0.881728	3.88414	15.595	7.8463e-05	0.000482661	-0.880432	3.88414	14.6063	0.000132473	0.000871806
ENSMUSG00000032463	23873	Faim	Fas apoptotic inhibitory molecule [Source:MGI Symbol;Acc:MGI:1344387]	0.896742	4.37341	15.4317	8.55433e-05	0.000518047	-0.724613	4.37341	9.73769	0.00180528	0.0072661
ENSMUSG00000032468	74125	Armc8	armadillo repeat containing 8 [Source:MGI Symbol;Acc:MGI:1921375]	0.316929	6.17762	3.92785	0.0474926	0.091462	-0.641809	6.17762	15.7797	7.11613e-05	0.000522192
ENSMUSG00000032475	17973	Nck1	non-catalytic region of tyrosine kinase adaptor protein 1 [Source:MGI Symbol;Acc:MGI:109601]	0.571477	4.57328	8.94399	0.00278383	0.00914587	-0.646569	4.57328	10.9963	0.000912957	0.00423647
ENSMUSG00000032497	71268	Lrrfip2	leucine rich repeat (in FLII) interacting protein 2 [Source:MGI Symbol;Acc:MGI:1918518]	0.38012	4.62872	3.84244	0.0499708	0.095387	-0.632471	4.62872	10.2654	0.00135548	0.00580498
ENSMUSG00000032551	66202	1110059G10Rik	RIKEN cDNA 1110059G10 gene [Source:MGI Symbol;Acc:MGI:1913452]	0.600561	4.75983	4.94385	0.0261837	0.0562613	-0.805989	4.75983	8.68714	0.00320464	0.0116158
ENSMUSG00000032563	94062	Mrpl3	mitochondrial ribosomal protein L3 [Source:MGI Symbol;Acc:MGI:2137204]	0.718588	5.82253	9.97598	0.00158596	0.00573125	-0.775609	5.82253	11.4479	0.000715744	0.00347045
ENSMUSG00000032565	75686	Nudt16	nudix (nucleoside diphosphate linked moiety X)-type motif 16 [Source:MGI Symbol;Acc:MGI:1922936]	0.696227	4.01319	6.56583	0.0103955	0.0266481	-0.690341	4.01319	6.25056	0.0124154	0.0346421
ENSMUSG00000032598	80987	Nckipsd	NCK interacting protein with SH3 domain [Source:MGI Symbol;Acc:MGI:1931834]	0.643579	6.09797	12.2525	0.000464635	0.00209129	-0.474024	6.09797	6.57773	0.0103263	0.0297788
ENSMUSG00000032615	103850	Nt5m	5',3'-nucleotidase, mitochondrial [Source:MGI Symbol;Acc:MGI:1917127]	0.749422	5.35712	13.5122	0.000237015	0.00120341	-0.538815	5.35712	6.87607	0.00873572	0.0260797
ENSMUSG00000032745	73274	Gpbp1	GC-rich promoter binding protein 1 [Source:MGI Symbol;Acc:MGI:1920524]	0.574219	6.5484	8.81361	0.00298991	0.00969194	-0.469153	6.5484	5.84548	0.0156171	0.0416895
ENSMUSG00000032802	76650	Srxn1	sulfiredoxin 1 homolog (S. cerevisiae) [Source:MGI Symbol;Acc:MGI:104971]	0.804929	6.0615	16.0967	6.0188e-05	0.000388329	-0.44571	6.0615	4.91516	0.026622	0.0635527
ENSMUSG00000032870	69780	Smap2	small ArfGAP 2 [Source:MGI Symbol;Acc:MGI:1917030]	0.734349	7.39696	11.3358	0.000760261	0.00311286	-0.937871	7.39696	18.2722	1.9148e-05	0.000177455
ENSMUSG00000032872	266690	Cyb5r4	cytochrome b5 reductase 4 [Source:MGI Symbol;Acc:MGI:2386848]	0.830899	3.8541	13.0685	0.000300301	0.00146568	-0.682232	3.8541	8.39984	0.00375254	0.0131665
ENSMUSG00000032966	14225	Fkbp1a	FK506 binding protein 1a [Source:MGI Symbol;Acc:MGI:95541]	1.04519	9.14108	15.4864	8.3101e-05	0.000505263	-0.898988	9.14108	11.5045	0.000694276	0.00338856
ENSMUSG00000033106	66432	Slc7a6os	solute carrier family 7, member 6 opposite strand [Source:MGI Symbol;Acc:MGI:1916951]	0.453322	2.85462	4.49439	0.0340063	0.0696782	-0.554569	2.85462	6.19113	0.0128392	0.0356467
ENSMUSG00000033294	100608	Noc4l	NOC4 like [Source:MGI Symbol;Acc:MGI:2140843]	1.09214	4.79711	31.7623	1.74244e-08	4.05401e-07	-0.483928	4.79711	6.10582	0.0134737	0.0370154
ENSMUSG00000033419	20616	Snap91	synaptosomal-associated protein 91 [Source:MGI Symbol;Acc:MGI:109132]	0.488212	8.66168	6.17291	0.0129721	0.0319166	-0.624857	8.66168	10.0612	0.00151423	0.00631557
ENSMUSG00000033430	57321	Terf2ip	telomeric repeat binding factor 2, interacting protein [Source:MGI Symbol;Acc:MGI:1929871]	0.636762	5.43239	9.71226	0.00183043	0.00643721	-0.785609	5.43239	14.4148	0.000146648	0.000944706
ENSMUSG00000033520	320581	Idi2	isopentenyl-diphosphate delta isomerase 2 [Source:MGI Symbol;Acc:MGI:2444315]	1.7339	-1.45701	5.62278	0.0177285	0.0410088	-2.4003	-1.45701	5.61641	0.0177931	0.0463116
ENSMUSG00000033543	235459	Gtf2a2	general transcription factor II A, 2 [Source:MGI Symbol;Acc:MGI:1933289]	0.921641	5.702	11.7371	0.000612662	0.00261113	-0.626315	5.702	5.40672	0.0200594	0.0508457
ENSMUSG00000033615	12889	Cplx1	complexin 1 [Source:MGI Symbol;Acc:MGI:104727]	0.91589	8.51244	15.718	7.35226e-05	0.000458662	-0.511135	8.51244	4.94059	0.0262331	0.0628567
ENSMUSG00000033701	72482	Acbd6	acyl-Coenzyme A binding domain containing 6 [Source:MGI Symbol;Acc:MGI:1919732]	1.2575	4.84111	29.1934	6.55018e-08	1.25724e-06	-0.527994	4.84111	5.11464	0.0237248	0.0580744
ENSMUSG00000033712	219158	Ccar2	cell cycle activator and apoptosis regulator 2 [Source:MGI Symbol;Acc:MGI:2444228]	0.526982	4.51042	7.49622	0.00618285	0.0175584	-0.629757	4.51042	10.2631	0.00135716	0.00580772
ENSMUSG00000033781	142688	Asb13	ankyrin repeat and SOCS box-containing 13 [Source:MGI Symbol;Acc:MGI:2145525]	0.941224	5.61315	20.3818	6.34295e-06	6.08017e-05	-0.708051	5.61315	11.3762	0.00074391	0.00358904
ENSMUSG00000033813	21399	Tcea1	transcription elongation factor A (SII) 1 [Source:MGI Symbol;Acc:MGI:1196624]	0.728887	3.19152	13.0243	0.000307483	0.00149682	-0.442866	3.19152	4.45331	0.0348337	0.0783606
ENSMUSG00000033845	27395	Mrpl15	mitochondrial ribosomal protein L15 [Source:MGI Symbol;Acc:MGI:1351639]	1.15125	5.47009	39.3224	3.59299e-10	1.55341e-08	-0.542471	5.47009	8.63675	0.00329449	0.0118467
ENSMUSG00000033931	52202	Rbm34	RNA binding motif protein 34 [Source:MGI Symbol;Acc:MGI:1098653]	0.680408	4.34356	10.8292	0.000999116	0.00391136	-0.837562	4.34356	15.5882	7.87464e-05	0.000567915
ENSMUSG00000033940	101314	Brk1	BRICK1, SCAR/WAVE actin-nucleating complex subunit [Source:MGI Symbol;Acc:MGI:1915406]	0.946378	8.67648	17.2415	3.29168e-05	0.000234173	-0.506174	8.67648	4.98496	0.0255686	0.061599
ENSMUSG00000033966	381113	Cdkl4	cyclin-dependent kinase-like 4 [Source:MGI Symbol;Acc:MGI:3587025]	0.686648	4.79021	8.53725	0.00347952	0.0110026	-0.960354	4.79021	16.1212	5.94167e-05	0.000451688
ENSMUSG00000033983	12812	Coil	coilin [Source:MGI Symbol;Acc:MGI:104842]	0.895638	2.71063	11.9199	0.000555365	0.00241291	-0.672698	2.71063	6.18166	0.0129081	0.0357938
ENSMUSG00000034024	12461	Cct2	chaperonin containing Tcp1, subunit 2 (beta) [Source:MGI Symbol;Acc:MGI:107186]	0.568426	7.83176	8.69446	0.00319178	0.0102434	-0.378437	7.83176	3.8539	0.0496305	0.103887
ENSMUSG00000034059	241525	Ypel4	yippee-like 4 (Drosophila) [Source:MGI Symbol;Acc:MGI:3605071]	0.63455	4.75396	6.84049	0.00891145	0.0235268	-0.68972	4.75396	7.91061	0.00491457	0.0164063
ENSMUSG00000034083	232236	Ccdc174	coiled-coil domain containing 174 [Source:MGI Symbol;Acc:MGI:2444652]	0.476748	4.80922	6.0188	0.0141543	0.0342376	-0.6629	4.80922	11.2529	0.000794966	0.00379714
ENSMUSG00000034168	238330	Irf2bpl	interferon regulatory factor 2 binding protein-like [Source:MGI Symbol;Acc:MGI:2442463]	0.638086	4.74314	11.1947	0.000820317	0.00331666	-0.596547	4.74314	9.47622	0.00208153	0.00818126
ENSMUSG00000034173	71970	Zbed5	zinc finger, BED type containing 5 [Source:MGI Symbol;Acc:MGI:1919220]	0.862079	2.66046	6.84233	0.00890225	0.0235062	-1.10452	2.66046	10.3961	0.00126284	0.00548953
ENSMUSG00000034187	18195	Nsf	N-ethylmaleimide sensitive fusion protein [Source:MGI Symbol;Acc:MGI:104560]	0.584536	10.1381	5.494	0.0190819	0.0435389	-0.809465	10.1381	10.4661	0.00121585	0.00533364
ENSMUSG00000034190	105513	Chmp7	charged multivesicular body protein 7 [Source:MGI Symbol;Acc:MGI:1913922]	0.681048	5.87344	12.7247	0.00036086	0.00170423	-0.548787	5.87344	8.16247	0.0042766	0.0147068
ENSMUSG00000034192	67678	Lsm3	LSM3 homolog, U6 small nuclear RNA and mRNA degradation associated [Source:MGI Symbol;Acc:MGI:1914928]	1.04612	5.83813	13.7794	0.000205582	0.00107101	-0.652964	5.83813	5.38321	0.0203315	0.0513182
ENSMUSG00000034203	72170	Chchd4	coiled-coil-helix-coiled-coil-helix domain containing 4 [Source:MGI Symbol;Acc:MGI:1919420]	0.947123	5.38161	16.4917	4.88629e-05	0.000326304	-0.859719	5.38161	13.3497	0.000258462	0.00150441
ENSMUSG00000034209	75668	Rasl10a	RAS-like, family 10, member A [Source:MGI Symbol;Acc:MGI:1922918]	0.899319	3.10815	12.2099	0.000475372	0.00212934	-0.548569	3.10815	4.30588	0.0379809	0.0837116
ENSMUSG00000034211	66258	Mrps17	mitochondrial ribosomal protein S17 [Source:MGI Symbol;Acc:MGI:1913508]	0.798188	6.18818	14.61	0.000132214	0.000744258	-0.613531	6.18818	8.57646	0.00340537	0.0121788
ENSMUSG00000034285	18082	Nipsnap1	nipsnap homolog 1 (C. elegans) [Source:MGI Symbol;Acc:MGI:1278344]	0.915366	6.88588	18.5793	1.62984e-05	0.00013113	-0.860045	6.88588	16.2974	5.41373e-05	0.000419665
ENSMUSG00000034295	225288	Fhod3	formin homology 2 domain containing 3 [Source:MGI Symbol;Acc:MGI:1925847]	0.871052	5.64028	20.975	4.6531e-06	4.69367e-05	-0.626256	5.64028	10.6739	0.0010866	0.0048646
ENSMUSG00000034321	66583	Exosc1	exosome component 1 [Source:MGI Symbol;Acc:MGI:1913833]	0.675988	4.97174	10.2506	0.00136637	0.00506536	-0.506647	4.97174	5.64742	0.0174811	0.0457124
ENSMUSG00000034336	226180	Ina	internexin neuronal intermediate filament protein, alpha [Source:MGI Symbol;Acc:MGI:96568]	0.441375	8.1113	4.20049	0.0404123	0.0803057	-0.73316	8.1113	11.4826	0.000702517	0.00341983
ENSMUSG00000034341	22378	Wbp2	WW domain binding protein 2 [Source:MGI Symbol;Acc:MGI:104709]	0.967723	7.92319	23.7422	1.10142e-06	1.38711e-05	-0.484304	7.92319	6.00197	0.0142899	0.0388263
ENSMUSG00000034343	67921	Ube2f	ubiquitin-conjugating enzyme E2F (putative) [Source:MGI Symbol;Acc:MGI:1915171]	0.526347	5.59001	9.73626	0.00180668	0.00637105	-0.380154	5.59001	4.9899	0.0254956	0.0614673
ENSMUSG00000034403	18744	Pja1	praja ring finger 1, E3 ubiquitin protein ligase [Source:MGI Symbol;Acc:MGI:1101765]	0.720318	7.90365	8.03485	0.00458859	0.0137649	-0.80064	7.90365	9.87697	0.0016736	0.00685416
ENSMUSG00000034432	108679	Cops8	COP9 signalosome subunit 8 [Source:MGI Symbol;Acc:MGI:1915363]	0.835421	7.16319	22.6653	1.9282e-06	2.23999e-05	-0.575066	7.16319	10.7229	0.00105817	0.00476789
ENSMUSG00000034484	67804	Snx2	sorting nexin 2 [Source:MGI Symbol;Acc:MGI:1915054]	0.769155	5.70855	18.5394	1.66427e-05	0.000133324	-0.644556	5.70855	12.7806	0.000350225	0.00193512
ENSMUSG00000034509	66591	Mad2l1bp	MAD2L1 binding protein [Source:MGI Symbol;Acc:MGI:1913841]	0.84978	4.18984	15.0565	0.000104343	0.000610943	-0.532873	4.18984	5.745	0.0165356	0.0436759
ENSMUSG00000034528	243168	Hsd17b13	hydroxysteroid (17-beta) dehydrogenase 13 [Source:MGI Symbol;Acc:MGI:2140804]	2.28433	0.867518	20.2028	6.96496e-06	6.55652e-05	-1.14208	0.867518	4.19926	0.0404416	0.087852
ENSMUSG00000034532	50759	Fbxo16	F-box protein 16 [Source:MGI Symbol;Acc:MGI:1354706]	0.626274	3.20864	5.14531	0.0233092	0.0511986	-0.779021	3.20864	7.53018	0.00606738	0.0195318
ENSMUSG00000034587	NA	8430429K09Rik	RIKEN cDNA 8430429K09 gene [Source:MGI Symbol;Acc:MGI:1918773]	0.562795	4.04534	7.77584	0.00529497	0.0154583	-0.411945	4.04534	4.01672	0.0450513	0.096064
ENSMUSG00000034639	74729	Setmar	SET domain without mariner transposase fusion [Source:MGI Symbol;Acc:MGI:1921979]	0.696987	3.21482	5.21949	0.0223351	0.0495203	-0.966479	3.21482	9.51312	0.00204008	0.00803906
ENSMUSG00000034673	18515	Pbx2	pre B cell leukemia homeobox 2 [Source:MGI Symbol;Acc:MGI:1341793]	0.662471	3.39704	9.21624	0.00239878	0.00808184	-0.581314	3.39704	6.63347	0.010008	0.0291063
ENSMUSG00000034681	19826	Rnps1	ribonucleic acid binding protein S1 [Source:MGI Symbol;Acc:MGI:97960]	0.807324	3.6497	15.1633	9.86019e-05	0.000583438	-0.474195	3.6497	4.96053	0.0259323	0.0622784
ENSMUSG00000034729	64657	Mrps10	mitochondrial ribosomal protein S10 [Source:MGI Symbol;Acc:MGI:1928139]	0.525504	3.17497	6.36642	0.01163	0.0292844	-0.454502	3.17497	4.45648	0.0347691	0.0782468
ENSMUSG00000034789	19336	Rab24	RAB24, member RAS oncogene family [Source:MGI Symbol;Acc:MGI:105065]	1.1462	5.36529	20.0976	7.359e-06	6.86199e-05	-0.504111	5.36529	3.90399	0.0481715	0.101568
ENSMUSG00000034825	78593	Nrip3	nuclear receptor interacting protein 3 [Source:MGI Symbol;Acc:MGI:1925843]	0.549959	7.14996	8.98828	0.00271716	0.00896723	-0.50897	7.14996	7.65486	0.00566195	0.0184533
ENSMUSG00000034839	67557	Larp6	La ribonucleoprotein domain family, member 6 [Source:MGI Symbol;Acc:MGI:1914807]	1.05288	4.44768	22.313	2.31636e-06	2.61135e-05	-0.629991	4.44768	7.77286	0.00530369	0.017469
ENSMUSG00000034868	67938	Myl12b	myosin, light chain 12B, regulatory [Source:MGI Symbol;Acc:MGI:107494]	1.16174	8.59515	24.221	8.589e-07	1.12387e-05	-0.669726	8.59515	8.17182	0.00425462	0.0146433
ENSMUSG00000034931	217207	Dhx8	DEAH (Asp-Glu-Ala-His) box polypeptide 8 [Source:MGI Symbol;Acc:MGI:1306823]	0.412896	4.53651	4.63675	0.0312943	0.0651002	-0.80836	4.53651	16.9441	3.84962e-05	0.000316246
ENSMUSG00000035062	245522	Zc4h2	zinc finger, C4H2 domain containing [Source:MGI Symbol;Acc:MGI:2679294]	0.432011	5.19424	4.89462	0.0269405	0.0575574	-0.635213	5.19424	10.3144	0.00131998	0.00568491
ENSMUSG00000035086	56208	Becn1	beclin 1, autophagy related [Source:MGI Symbol;Acc:MGI:1891828]	0.780953	5.64028	17.9786	2.23401e-05	0.000170034	-0.427966	5.64028	5.33041	0.0209565	0.0525871
ENSMUSG00000035165	57442	Kcne3	potassium voltage-gated channel, Isk-related subfamily, gene 3 [Source:MGI Symbol;Acc:MGI:1891124]	0.95282	-0.956601	4.14918	0.0416547	0.0823425	-2.04408	-0.956601	10.3304	0.00130854	0.00564866
ENSMUSG00000035215	66094	Lsm7	LSM7 homolog, U6 small nuclear RNA and mRNA degradation associated [Source:MGI Symbol;Acc:MGI:1913344]	0.874007	1.21704	8.47327	0.00360404	0.0113041	-0.658615	1.21704	4.03465	0.0445748	0.095169
ENSMUSG00000035232	236900	Pdk3	pyruvate dehydrogenase kinase, isoenzyme 3 [Source:MGI Symbol;Acc:MGI:2384308]	0.652608	4.68436	8.1783	0.00423945	0.0129139	-0.624774	4.68436	7.29777	0.00690402	0.0215831
ENSMUSG00000035772	118451	Mrps2	mitochondrial ribosomal protein S2 [Source:MGI Symbol;Acc:MGI:2153089]	0.78147	4.43107	13.862	0.000196739	0.00103587	-0.668481	4.43107	9.78252	0.00176179	0.0071352
ENSMUSG00000035790	66994	Cep19	centrosomal protein 19 [Source:MGI Symbol;Acc:MGI:1914244]	1.00259	6.54635	21.8275	2.9829e-06	3.22203e-05	-0.925704	6.54635	18.4515	1.74286e-05	0.000163816
ENSMUSG00000035910	195208	Dcdc2a	doublecortin domain containing 2a [Source:MGI Symbol;Acc:MGI:2652818]	1.37404	3.26735	37.2098	1.06082e-09	3.77818e-08	-0.591062	3.26735	6.37015	0.0116056	0.0328248
ENSMUSG00000035953	219024	Tmem55b	transmembrane protein 55b [Source:MGI Symbol;Acc:MGI:2448501]	0.595281	6.03052	7.38809	0.0065657	0.0184334	-0.464022	6.03052	4.45942	0.0347093	0.0781438
ENSMUSG00000035958	56196	Tdp2	tyrosyl-DNA phosphodiesterase 2 [Source:MGI Symbol;Acc:MGI:1860486]	0.699948	4.29438	8.12461	0.00436685	0.013216	-1.04864	4.29438	17.3494	3.10989e-05	0.000266165
ENSMUSG00000035969	100213	Rusc2	RUN and SH3 domain containing 2 [Source:MGI Symbol;Acc:MGI:2140371]	0.580752	4.57407	9.13994	0.00250089	0.00837373	-0.570221	4.57407	8.44689	0.00365667	0.0129138
ENSMUSG00000036052	56323	Dnajb5	DnaJ heat shock protein family (Hsp40) member B5 [Source:MGI Symbol;Acc:MGI:1930018]	0.580269	5.49996	5.48326	0.0191994	0.0437535	-0.747133	5.49996	8.94162	0.00278746	0.0103588
ENSMUSG00000036188	217473	Ankmy2	ankyrin repeat and MYND domain containing 2 [Source:MGI Symbol;Acc:MGI:2144755]	0.501336	7.06363	7.12231	0.00761305	0.0207102	-0.572971	7.06363	9.23181	0.00237846	0.00911971
ENSMUSG00000036214	76416	Znrd1as	zinc ribbon domain containing 1, antisense [Source:MGI Symbol;Acc:MGI:1923666]	0.872006	2.09378	9.23906	0.00236907	0.007993	-0.704385	2.09378	5.4353	0.0197337	0.0501564
ENSMUSG00000036249	71684	Rbm43	RNA binding motif protein 43 [Source:MGI Symbol;Acc:MGI:1918934]	0.867534	4.37969	14.6868	0.000126929	0.000719582	-0.637053	4.37969	7.68831	0.00555795	0.0181815
ENSMUSG00000036309	21402	Skp1a	S-phase kinase-associated protein 1A [Source:MGI Symbol;Acc:MGI:103575]	0.943994	9.88216	14.3566	0.000151245	0.000833928	-0.521232	9.88216	4.42706	0.0353734	0.0792876
ENSMUSG00000036315	66136	Znrd1	zinc ribbon domain containing, 1 [Source:MGI Symbol;Acc:MGI:1913386]	0.859831	5.20884	10.6214	0.00111785	0.00428518	-0.784326	5.20884	8.7157	0.00315482	0.0114699
ENSMUSG00000036323	66661	Srp72	signal recognition particle 72 [Source:MGI Symbol;Acc:MGI:1333795]	0.446435	7.18376	8.25571	0.0040624	0.0125086	-0.362759	7.18376	5.41752	0.0199356	0.0505854
ENSMUSG00000036371	66870	Serbp1	serpine1 mRNA binding protein 1 [Source:MGI Symbol;Acc:MGI:1914120]	1.04019	7.37398	28.3384	1.01853e-07	1.84115e-06	-0.523649	7.37398	7.24526	0.00710883	0.0220998
ENSMUSG00000036376	30946	Abt1	activator of basal transcription 1 [Source:MGI Symbol;Acc:MGI:1353636]	1.21825	3.48408	19.7073	9.0256e-06	8.10083e-05	-0.764117	3.48408	7.43706	0.00638942	0.020313
ENSMUSG00000036430	72726	Tbcc	tubulin-specific chaperone C [Source:MGI Symbol;Acc:MGI:1919976]	1.18837	4.10147	19.2546	1.14393e-05	9.85084e-05	-0.723004	4.10147	6.96683	0.00830344	0.0250567
ENSMUSG00000036438	12314	Calm2	calmodulin 2 [Source:MGI Symbol;Acc:MGI:103250]	1.07719	11.7106	11.1734	0.000829767	0.00334439	-0.978512	11.7106	9.25459	0.00234906	0.00903476
ENSMUSG00000036442	59016	Thap11	THAP domain containing 11 [Source:MGI Symbol;Acc:MGI:1930964]	0.833249	4.6995	9.52413	0.00202788	0.00702988	-0.717957	4.6995	6.94633	0.00839914	0.0252909
ENSMUSG00000036492	386454	Rnf39	ring finger protein 39 [Source:MGI Symbol;Acc:MGI:2156378]	0.704712	0.808357	4.1125	0.0425674	0.0837547	-0.914687	0.808357	5.73088	0.0166691	0.0439178
ENSMUSG00000036513	52245	Commd2	COMM domain containing 2 [Source:MGI Symbol;Acc:MGI:1098806]	0.661307	4.99891	8.52199	0.0035088	0.0110647	-0.591002	4.99891	6.6712	0.00979835	0.0286105
ENSMUSG00000036564	234593	Ndrg4	N-myc downstream regulated gene 4 [Source:MGI Symbol;Acc:MGI:2384590]	0.93286	10.5055	14.7606	0.000122062	0.000695749	-0.478419	10.5055	3.92954	0.0474449	0.100364
ENSMUSG00000036598	244608	Ccdc113	coiled-coil domain containing 113 [Source:MGI Symbol;Acc:MGI:3606076]	0.914802	1.3542	10.371	0.00128007	0.00479313	-0.638763	1.3542	4.22563	0.0398177	0.0868134
ENSMUSG00000036613	380752	Tssc1	tumor suppressing subtransferable candidate 1 [Source:MGI Symbol;Acc:MGI:1289332]	0.829055	5.73345	14.6588	0.000128834	0.000728408	-0.733608	5.73345	11.3289	0.000763117	0.00366589
ENSMUSG00000036615	170767	Rfxap	regulatory factor X-associated protein [Source:MGI Symbol;Acc:MGI:2180854]	0.722908	4.5633	5.95992	0.0146347	0.0351615	-1.02011	4.5633	11.5039	0.000694506	0.0033887
ENSMUSG00000036721	22758	Zscan12	zinc finger and SCAN domain containing 12 [Source:MGI Symbol;Acc:MGI:1099444]	0.483963	2.4521	4.26389	0.0389306	0.0778194	-0.650751	2.4521	6.92542	0.00849789	0.025515
ENSMUSG00000036764	30045	Dnajc12	DnaJ heat shock protein family (Hsp40) member C12 [Source:MGI Symbol;Acc:MGI:1353428]	0.51348	3.88569	3.88427	0.0487403	0.0934102	-1.19222	3.88569	19.6536	9.2827e-06	9.77509e-05
ENSMUSG00000036775	26378	Decr2	2-4-dienoyl-Coenzyme A reductase 2, peroxisomal [Source:MGI Symbol;Acc:MGI:1347059]	0.66711	5.98316	9.13768	0.00250399	0.00838076	-0.642798	5.98316	8.39249	0.00376775	0.0132088
ENSMUSG00000036822	106021	Topors	topoisomerase I binding, arginine/serine-rich [Source:MGI Symbol;Acc:MGI:2146189]	0.465032	4.35511	5.98001	0.0144689	0.034858	-0.727591	4.35511	13.9188	0.000190875	0.00116944
ENSMUSG00000036890	227835	Gtdc1	glycosyltransferase-like domain containing 1 [Source:MGI Symbol;Acc:MGI:2444269]	0.715461	5.98159	8.86268	0.0029106	0.00948616	-0.757152	5.98159	9.80142	0.00174377	0.00708105
ENSMUSG00000036923	216021	Stox1	storkhead box 1 [Source:MGI Symbol;Acc:MGI:2684909]	0.678961	2.11051	6.36124	0.011664	0.0293481	-0.803841	2.11051	7.79644	0.00523493	0.0172696
ENSMUSG00000036934	66714	4921524J17Rik	RIKEN cDNA 4921524J17 gene [Source:MGI Symbol;Acc:MGI:1913964]	0.654766	3.93323	6.18628	0.0128744	0.0317134	-1.19181	3.93323	19.2907	1.1225e-05	0.000114194
ENSMUSG00000036940	99982	Kdm1a	lysine (K)-specific demethylase 1A [Source:MGI Symbol;Acc:MGI:1196256]	0.557077	6.47771	8.2836	0.00400048	0.0123451	-0.826067	6.47771	17.8847	2.34698e-05	0.000210538
ENSMUSG00000036955	72320	Kif1bp	KIF1 binding protein [Source:MGI Symbol;Acc:MGI:1919570]	0.40705	7.0072	5.35746	0.0206338	0.0464592	-0.670492	7.0072	14.3427	0.00015237	0.000972237
ENSMUSG00000036966	223918	Spryd3	SPRY domain containing 3 [Source:MGI Symbol;Acc:MGI:2446175]	0.577034	6.8397	8.13515	0.00434152	0.0131555	-0.527797	6.8397	6.77026	0.00926893	0.0273503
ENSMUSG00000036983	224481	Tfb1m	transcription factor B1, mitochondrial [Source:MGI Symbol;Acc:MGI:2146851]	0.624332	2.11782	4.36931	0.0365919	0.0740135	-0.826636	2.11782	6.95526	0.00835734	0.0251876
ENSMUSG00000036989	55992	Trim3	tripartite motif-containing 3 [Source:MGI Symbol;Acc:MGI:1860040]	0.939224	6.63423	20.1511	7.15589e-06	6.69867e-05	-0.594369	6.63423	8.08312	0.00446795	0.0152523
ENSMUSG00000036992	56488	Nxt1	NTF2-related export protein 1 [Source:MGI Symbol;Acc:MGI:1929619]	1.06542	2.85497	15.0568	0.000104321	0.000610943	-0.783079	2.85497	7.56187	0.00596162	0.0192653
ENSMUSG00000037070	19656	Rbmxl1	RNA binding motif protein, X-linked like-1 [Source:MGI Symbol;Acc:MGI:1343045]	1.18144	2.98868	20.2331	6.85557e-06	6.46806e-05	-0.5711	2.98868	4.44335	0.0350374	0.0787343
ENSMUSG00000037085	68260	Trmt12	tRNA methyltranferase 12 [Source:MGI Symbol;Acc:MGI:1915510]	1.1201	3.81033	19.7362	8.89032e-06	8.0094e-05	-0.780234	3.81033	9.1795	0.00244741	0.00934351
ENSMUSG00000037149	104721	Ddx1	DEAD (Asp-Glu-Ala-Asp) box polypeptide 1 [Source:MGI Symbol;Acc:MGI:2144727]	0.800848	7.77775	21.4175	3.69381e-06	3.85106e-05	-0.452964	7.77775	6.87335	0.00874906	0.0261149
ENSMUSG00000037217	20964	Syn1	synapsin I [Source:MGI Symbol;Acc:MGI:98460]	0.528915	8.04377	4.42924	0.0353282	0.0718515	-0.680143	8.04377	7.28294	0.00696125	0.0217175
ENSMUSG00000037236	17184	Matr3	matrin 3 [Source:MGI Symbol;Acc:MGI:1298379]	0.707225	8.88581	11.4048	0.000732537	0.0030237	-0.669578	8.88581	10.2147	0.00139328	0.00592303
ENSMUSG00000037279	107586	Ovol2	ovo like zinc finger 2 [Source:MGI Symbol;Acc:MGI:1338039]	1.54419	3.00149	25.2817	4.95396e-07	7.13941e-06	-0.865774	3.00149	7.54436	0.00601981	0.0194035
ENSMUSG00000037296	67207	Lsm1	LSM1 homolog, mRNA degradation associated [Source:MGI Symbol;Acc:MGI:1914457]	0.913896	4.48137	12.0522	0.000517302	0.00227404	-0.84146	4.48137	9.95845	0.00160113	0.0066155
ENSMUSG00000037364	83701	Srrt	serrate RNA effector molecule homolog (Arabidopsis) [Source:MGI Symbol;Acc:MGI:1933527]	0.670929	4.57525	11.7008	0.000624717	0.00265039	-0.426242	4.57525	4.58786	0.0321992	0.0737257
ENSMUSG00000037474	76843	Dtl	denticleless E3 ubiquitin protein ligase [Source:MGI Symbol;Acc:MGI:1924093]	1.00307	3.9696	12.6383	0.000377914	0.00176727	-1.30119	3.9696	20.0992	7.35256e-06	8.00904e-05
ENSMUSG00000037514	74450	Pank2	pantothenate kinase 2 [Source:MGI Symbol;Acc:MGI:1921700]	0.658115	5.08015	8.68922	0.00320098	0.010265	-0.708989	5.08015	9.85162	0.00169682	0.00693066
ENSMUSG00000037531	74600	Mrpl47	mitochondrial ribosomal protein L47 [Source:MGI Symbol;Acc:MGI:1921850]	0.759392	4.72421	12.7911	0.000348264	0.00164985	-0.613333	4.72421	8.12231	0.00437238	0.0149952
ENSMUSG00000037594	217887	BC022687	cDNA sequence BC022687 [Source:MGI Symbol;Acc:MGI:2443738]	0.869402	3.56983	12.0961	0.000505267	0.00223166	-0.900915	3.56983	12.1811	0.000482758	0.00251343
ENSMUSG00000037722	54342	Gnpnat1	glucosamine-phosphate N-acetyltransferase 1 [Source:MGI Symbol;Acc:MGI:1858963]	0.586425	2.62538	4.90018	0.0268538	0.0574478	-0.874848	2.62538	9.9792	0.00158319	0.00655428
ENSMUSG00000037735	NA	2810032G03Rik	RIKEN cDNA 2810032G03 gene [Source:MGI Symbol;Acc:MGI:1919919]	0.708876	2.79371	5.0021	0.0253165	0.0547063	-0.970266	2.79371	8.76069	0.00307793	0.011222
ENSMUSG00000037740	99045	Mrps26	mitochondrial ribosomal protein S26 [Source:MGI Symbol;Acc:MGI:1333830]	0.896339	4.6343	12.7844	0.000349526	0.00165443	-0.4976	4.6343	3.88136	0.0488251	0.102598
ENSMUSG00000037750	216971	Fam222b	family with sequence similarity 222, member B [Source:MGI Symbol;Acc:MGI:2384939]	0.412097	5.03619	4.50001	0.0338947	0.0694843	-0.785901	5.03619	15.7917	7.07106e-05	0.000519566
ENSMUSG00000037822	68552	Smim14	small integral membrane protein 14 [Source:MGI Symbol;Acc:MGI:1915802]	0.412263	6.62275	5.16133	0.0230952	0.0508495	-0.566382	6.62275	9.624	0.00192051	0.00765422
ENSMUSG00000037979	215707	Ccdc92	coiled-coil domain containing 92 [Source:MGI Symbol;Acc:MGI:106485]	0.729782	4.79988	12.2275	0.000470911	0.00211387	-0.533321	4.79988	6.37922	0.0115464	0.032685
ENSMUSG00000037984	11922	Neurod6	neurogenic differentiation 6 [Source:MGI Symbol;Acc:MGI:106593]	0.876134	6.96474	8.20655	0.00417393	0.0127676	-0.978493	6.96474	10.1618	0.00143379	0.00605229
ENSMUSG00000038028	319801	Tigar	Trp53 induced glycolysis repulatory phosphatase [Source:MGI Symbol;Acc:MGI:2442752]	0.662349	4.32619	8.82678	0.00296842	0.00963157	-0.51939	4.32619	5.28639	0.0214927	0.0536358
ENSMUSG00000038160	11793	Atg5	autophagy related 5 [Source:MGI Symbol;Acc:MGI:1277186]	0.585012	5.15905	11.1284	0.00085014	0.00341513	-0.426402	5.15905	5.77181	0.0162853	0.0431232
ENSMUSG00000038187	68815	Btbd10	BTB (POZ) domain containing 10 [Source:MGI Symbol;Acc:MGI:1916065]	0.710881	6.92594	8.56146	0.00343355	0.0108798	-1.15916	6.92594	22.2618	2.3789e-06	3.14468e-05
ENSMUSG00000038244	320878	Mical2	microtubule associated monooxygenase, calponin and LIM domain containing 2 [Source:MGI Symbol;Acc:MGI:2444947]	0.707406	7.54892	11.2409	0.000800144	0.00324605	-0.620502	7.54892	8.63303	0.00330122	0.0118633
ENSMUSG00000038255	18013	Neurod2	neurogenic differentiation 2 [Source:MGI Symbol;Acc:MGI:107755]	0.709311	4.77251	9.40859	0.00215971	0.00740581	-0.752836	4.77251	10.3073	0.00132507	0.00569951
ENSMUSG00000038299	225348	Wdr36	WD repeat domain 36 [Source:MGI Symbol;Acc:MGI:1917819]	0.635597	4.71083	8.45045	0.00364953	0.0114197	-0.697537	4.71083	9.87322	0.00167702	0.00686647
ENSMUSG00000038301	71982	Snx10	sorting nexin 10 [Source:MGI Symbol;Acc:MGI:1919232]	0.748244	7.91304	12.2551	0.000463991	0.00208896	-0.853927	7.91304	15.8499	6.8569e-05	0.000507386
ENSMUSG00000038305	67198	Spats2l	spermatogenesis associated, serine-rich 2-like [Source:MGI Symbol;Acc:MGI:1914448]	0.578077	4.96562	8.4549	0.00364062	0.0113939	-0.683161	4.96562	11.4777	0.000704365	0.00342584
ENSMUSG00000038331	212712	Satb2	special AT-rich sequence binding protein 2 [Source:MGI Symbol;Acc:MGI:2679336]	0.454811	5.45446	3.95823	0.0466427	0.0901938	-0.633997	5.45446	7.56752	0.00594296	0.0192103
ENSMUSG00000038412	56295	Higd1a	HIG1 domain family, member 1A [Source:MGI Symbol;Acc:MGI:1930666]	1.04071	7.33029	26.3396	2.86361e-07	4.44787e-06	-0.41971	7.33029	4.33477	0.0373414	0.0826823
ENSMUSG00000038417	103199	Fig4	FIG4 phosphoinositide 5-phosphatase [Source:MGI Symbol;Acc:MGI:2143585]	0.598715	4.48922	7.66611	0.00562676	0.0162543	-0.772557	4.48922	12.2513	0.000464923	0.00243645
ENSMUSG00000038429	22225	Usp5	ubiquitin specific peptidase 5 (isopeptidase T) [Source:MGI Symbol;Acc:MGI:1347343]	0.680806	7.27573	12.0507	0.000517721	0.00227529	-0.473605	7.27573	5.82802	0.0157729	0.0420318
ENSMUSG00000038462	66694	Uqcrfs1	ubiquinol-cytochrome c reductase, Rieske iron-sulfur polypeptide 1 [Source:MGI Symbol;Acc:MGI:1913944]	0.964606	7.15819	13.9798	0.000184783	0.000982173	-0.625801	7.15819	5.91721	0.0149937	0.0403723
ENSMUSG00000038500	75210	Prr3	proline-rich polypeptide 3 [Source:MGI Symbol;Acc:MGI:1922460]	0.532358	4.66308	7.37564	0.00661132	0.0185367	-0.687876	4.66308	11.8657	0.000571782	0.00288644
ENSMUSG00000038530	19736	Rgs4	regulator of G-protein signaling 4 [Source:MGI Symbol;Acc:MGI:108409]	0.720281	9.87986	6.73196	0.00947005	0.0247279	-1.00769	9.87986	13.0428	0.000304445	0.00172361
ENSMUSG00000038544	66209	Inip	INTS3 and NABP interacting protein [Source:MGI Symbol;Acc:MGI:1913459]	0.580607	4.49149	10.4559	0.00122261	0.00462127	-0.498673	4.49149	7.40453	0.00650597	0.0205885
ENSMUSG00000038546	56705	Ranbp9	RAN binding protein 9 [Source:MGI Symbol;Acc:MGI:1928741]	0.652639	6.53632	10.0492	0.00152417	0.0055462	-0.978051	6.53632	22.1015	2.58612e-06	3.37342e-05
ENSMUSG00000038550	229599	Ciart	circadian associated repressor of transcription [Source:MGI Symbol;Acc:MGI:2684975]	0.745939	4.82853	4.32385	0.0375817	0.0756278	-0.839196	4.82853	5.40095	0.0201258	0.0509523
ENSMUSG00000038619	56205	Ensa	endosulfine alpha [Source:MGI Symbol;Acc:MGI:1891189]	1.12372	8.86737	27.6632	1.44384e-07	2.48161e-06	-0.700846	8.86737	10.8962	0.000963617	0.00441417
ENSMUSG00000038628	67005	Polr3k	polymerase (RNA) III (DNA directed) polypeptide K [Source:MGI Symbol;Acc:MGI:1914255]	1.09942	6.91764	27.3787	1.67262e-07	2.80582e-06	-0.462538	6.91764	4.90137	0.0268354	0.0639354
ENSMUSG00000038646	67148	Fam103a1	family with sequence similarity 103, member A1 [Source:MGI Symbol;Acc:MGI:1914398]	0.886557	4.86363	9.30919	0.00228008	0.0077326	-1.02176	4.86363	12.0621	0.000514567	0.00264294
ENSMUSG00000038671	76688	Arfrp1	ADP-ribosylation factor related protein 1 [Source:MGI Symbol;Acc:MGI:1923938]	0.438292	5.38348	7.00276	0.0081384	0.021875	-0.654357	5.38348	15.1386	9.98973e-05	0.000689904
ENSMUSG00000038683	68083	Pak1ip1	PAK1 interacting protein 1 [Source:MGI Symbol;Acc:MGI:1915333]	0.635983	6.32877	12.2968	0.000453728	0.00204935	-0.514611	6.32877	7.9745	0.00474409	0.0159419
ENSMUSG00000038722	231889	Bud31	BUD31 homolog [Source:MGI Symbol;Acc:MGI:2141291]	0.887513	5.5457	13.326	0.000261756	0.00130761	-0.498155	5.5457	4.18381	0.0408118	0.0884634
ENSMUSG00000038806	208768	Sde2	SDE2 telomere maintenance homolog (S. pombe) [Source:MGI Symbol;Acc:MGI:2384788]	0.530103	5.12742	10.2877	0.00133921	0.0049779	-0.660974	5.12742	15.4273	8.57427e-05	0.000607404
ENSMUSG00000038848	228994	Ythdf1	YTH domain family 1 [Source:MGI Symbol;Acc:MGI:1917431]	0.467803	5.96607	4.03202	0.0446444	0.087113	-1.04142	5.96607	19.432	1.04245e-05	0.000107414
ENSMUSG00000038876	68031	Rnf146	ring finger protein 146 [Source:MGI Symbol;Acc:MGI:1915281]	0.587099	5.86362	12.3085	0.000450903	0.00203879	-0.598876	5.86362	12.5609	0.000393899	0.00212328
ENSMUSG00000038895	319601	Zfp653	zinc finger protein 653 [Source:MGI Symbol;Acc:MGI:2442362]	0.97207	1.95488	12.1816	0.000482636	0.00215382	-0.607779	1.95488	4.21923	0.0399684	0.0870965
ENSMUSG00000038909	217127	Kat7	K(lysine) acetyltransferase 7 [Source:MGI Symbol;Acc:MGI:2182799]	0.413091	6.13614	6.41962	0.0112866	0.0285269	-0.696667	6.13614	17.8633	2.37359e-05	0.000212584
ENSMUSG00000038910	224860	Plcl2	phospholipase C-like 2 [Source:MGI Symbol;Acc:MGI:1352756]	0.51182	5.856	7.33679	0.00675573	0.0188973	-0.692544	5.856	13.169	0.000284613	0.00163338
ENSMUSG00000038975	19352	Rabggtb	Rab geranylgeranyl transferase, b subunit [Source:MGI Symbol;Acc:MGI:99537]	0.612421	6.34501	8.46554	0.00361938	0.0113444	-0.603822	6.34501	8.15548	0.00429313	0.0147576
ENSMUSG00000038984	239364	Tspyl5	testis-specific protein, Y-encoded-like 5 [Source:MGI Symbol;Acc:MGI:2442458]	0.424346	6.86671	3.90207	0.0482267	0.0925951	-0.920125	6.86671	17.9966	2.21297e-05	0.000200771
ENSMUSG00000039033	75812	Tasp1	taspase, threonine aspartase 1 [Source:MGI Symbol;Acc:MGI:1923062]	0.780795	5.20276	13.8398	0.000199079	0.00104329	-0.957626	5.20276	20.1462	7.17425e-06	7.84026e-05
ENSMUSG00000039058	229949	Ak5	adenylate kinase 5 [Source:MGI Symbol;Acc:MGI:2677491]	0.795145	6.73218	16.6534	4.48708e-05	0.000303144	-0.614807	6.73218	9.91176	0.00164226	0.00675739
ENSMUSG00000039098	NA	Gm9767	predicted gene 9767 [Source:MGI Symbol;Acc:MGI:3704352]	1.17185	-0.926925	4.12414	0.0422756	0.0833341	-1.67414	-0.926925	5.51666	0.0188362	0.0483835
ENSMUSG00000039105	66290	Atp6v1g1	ATPase, H+ transporting, lysosomal V1 subunit G1 [Source:MGI Symbol;Acc:MGI:1913540]	1.12482	5.59137	29.24	6.39451e-08	1.23438e-06	-0.545364	5.59137	6.84842	0.00887196	0.0264206
ENSMUSG00000039148	20227	Sart1	squamous cell carcinoma antigen recognized by T cells 1 [Source:MGI Symbol;Acc:MGI:1309453]	0.956175	4.63588	19.1517	1.20727e-05	0.000103011	-0.463131	4.63588	4.40382	0.0358585	0.0800737
ENSMUSG00000039231	20937	Suv39h1	suppressor of variegation 3-9 homolog 1 (Drosophila) [Source:MGI Symbol;Acc:MGI:1099440]	0.389332	5.0971	4.02887	0.044728	0.0872455	-0.571933	5.0971	8.45514	0.00364014	0.0128636
ENSMUSG00000039349	226777	C130074G19Rik	RIKEN cDNA C130074G19 gene [Source:MGI Symbol;Acc:MGI:2444831]	0.619125	3.57229	7.21175	0.0072428	0.0199114	-0.521266	3.57229	4.85198	0.0276144	0.0652622
ENSMUSG00000039356	227715	Exosc2	exosome component 2 [Source:MGI Symbol;Acc:MGI:2385133]	0.466822	4.55808	5.48612	0.019168	0.0436939	-0.533558	4.55808	6.95089	0.00837777	0.0252356
ENSMUSG00000039431	54384	Mtmr7	myotubularin related protein 7 [Source:MGI Symbol;Acc:MGI:1891693]	0.580039	5.80105	6.59611	0.0102202	0.0262829	-0.813404	5.80105	12.7332	0.000359224	0.00197444
ENSMUSG00000039478	78506	Micu3	mitochondrial calcium uptake family, member 3 [Source:MGI Symbol;Acc:MGI:1925756]	1.1935	9.19331	11.9974	0.000532735	0.00232967	-0.717891	9.19331	4.41401	0.035645	0.0796728
ENSMUSG00000039556	54646	Ppp1r3f	protein phosphatase 1, regulatory (inhibitor) subunit 3F [Source:MGI Symbol;Acc:MGI:1859617]	0.733898	4.4296	11.908	0.00055892	0.0024265	-0.508676	4.4296	5.51919	0.018809	0.0483335
ENSMUSG00000039563	NA	2210406O10Rik	RIKEN cDNA 2210406O10 gene [Source:MGI Symbol;Acc:MGI:1923960]	0.864022	2.35788	12.3626	0.000438023	0.00198966	-0.69544	2.35788	7.10234	0.00769835	0.0235613
ENSMUSG00000039620	319582	6430573F11Rik	RIKEN cDNA 6430573F11 gene [Source:MGI Symbol;Acc:MGI:2442328]	1.16348	3.77952	31.0697	2.48926e-08	5.50164e-07	-0.441612	3.77952	4.27828	0.0386023	0.0847805
ENSMUSG00000039630	51810	Hnrnpu	heterogeneous nuclear ribonucleoprotein U [Source:MGI Symbol;Acc:MGI:1858195]	0.42161	7.98909	3.96349	0.0464972	0.0899643	-0.989734	7.98909	21.4327	3.66467e-06	4.50691e-05
ENSMUSG00000039706	16826	Ldb2	LIM domain binding 2 [Source:MGI Symbol;Acc:MGI:894670]	0.965336	6.3133	23.8226	1.05633e-06	1.34039e-05	-0.642464	6.3133	10.5164	0.00118322	0.00523213
ENSMUSG00000039717	76897	Ralyl	RALY RNA binding protein-like [Source:MGI Symbol;Acc:MGI:1924147]	0.912061	6.45085	19.229	1.15941e-05	9.96369e-05	-0.833443	6.45085	15.9092	6.64541e-05	0.000494353
ENSMUSG00000039725	381406	Trp53rka	transformation related protein 53 regulating kinase A [Source:MGI Symbol;Acc:MGI:1918294]	0.778234	3.72613	8.34024	0.00387764	0.0120324	-0.774795	3.72613	7.91695	0.00489738	0.0163652
ENSMUSG00000039737	66801	Prkrip1	Prkr interacting protein 1 (IL11 inducible) [Source:MGI Symbol;Acc:MGI:1914051]	0.945931	4.71379	30.914	2.69726e-08	5.92231e-07	-0.437461	4.71379	6.40194	0.0113996	0.0323676
ENSMUSG00000039771	20022	Polr2j	polymerase (RNA) II (DNA directed) polypeptide J [Source:MGI Symbol;Acc:MGI:109582]	0.973405	5.83108	17.3583	3.09545e-05	0.000222859	-0.584668	5.83108	6.25307	0.0123979	0.0345989
ENSMUSG00000039804	228869	Ncoa5	nuclear receptor coactivator 5 [Source:MGI Symbol;Acc:MGI:2385165]	0.47323	4.34487	5.97675	0.0144957	0.0348985	-0.630257	4.34487	10.1603	0.00143494	0.00605414
ENSMUSG00000039810	103284	Zc3h10	zinc finger CCCH type containing 10 [Source:MGI Symbol;Acc:MGI:2143670]	0.677363	1.96725	5.52701	0.0187251	0.0428649	-0.727794	1.96725	5.72172	0.0167563	0.0441
ENSMUSG00000039826	227682	Trub2	TruB pseudouridine (psi) synthase family member 2 [Source:MGI Symbol;Acc:MGI:2442186]	0.495448	4.95805	7.79833	0.00522946	0.0153096	-0.492844	4.95805	7.49487	0.00618748	0.0198347
ENSMUSG00000039914	210582	Coq10a	coenzyme Q10A [Source:MGI Symbol;Acc:MGI:2684847]	0.663625	5.57642	6.85963	0.00881648	0.0233238	-0.925356	5.57642	13.0562	0.00030229	0.00171315
ENSMUSG00000039983	269336	Ccdc32	coiled-coil domain containing 32 [Source:MGI Symbol;Acc:MGI:2685477]	0.896894	5.61413	22.2406	2.40535e-06	2.69358e-05	-0.510446	5.61413	7.1296	0.00758216	0.0232779
ENSMUSG00000039989	12418	Cbx4	chromobox 4 [Source:MGI Symbol;Acc:MGI:1195985]	0.621487	4.27388	5.8971	0.0151658	0.0361784	-0.832157	4.27388	10.2075	0.00139874	0.00594324
ENSMUSG00000040025	213541	Ythdf2	YTH domain family 2 [Source:MGI Symbol;Acc:MGI:2444233]	0.803931	6.45985	10.6952	0.00107413	0.00414581	-0.767442	6.45985	9.67637	0.00186653	0.0074889
ENSMUSG00000040128	108767	Pnrc1	proline-rich nuclear receptor coactivator 1 [Source:MGI Symbol;Acc:MGI:1917838]	0.595267	5.22526	4.43747	0.0351584	0.0715668	-1.12346	5.22526	15.3074	9.1356e-05	0.000641481
ENSMUSG00000040177	68277	2310057M21Rik	RIKEN cDNA 2310057M21 gene [Source:MGI Symbol;Acc:MGI:1915527]	1.10251	4.34759	16.0821	6.0654e-05	0.000390884	-1.00973	4.34759	13.0717	0.000299793	0.00170091
ENSMUSG00000040242	67529	Fgfr1op2	FGFR1 oncogene partner 2 [Source:MGI Symbol;Acc:MGI:1914779]	0.416681	5.75138	5.00454	0.0252809	0.0546503	-0.935649	5.75138	24.4451	7.64563e-07	1.24158e-05
ENSMUSG00000040331	67872	Nsmce4a	NSE4 homolog A, SMC5-SMC6 complex component [Source:MGI Symbol;Acc:MGI:1915122]	0.452769	4.65403	5.01024	0.0251979	0.054513	-0.551447	4.65403	7.20024	0.0072894	0.0225069
ENSMUSG00000040415	80904	Dtx3	deltex 3, E3 ubiquitin ligase [Source:MGI Symbol;Acc:MGI:2135752]	0.686374	6.30708	13.7737	0.000206199	0.00107389	-0.439335	6.30708	5.60568	0.0179024	0.0465528
ENSMUSG00000040482	112403	Dxo	decapping exoribonuclease [Source:MGI Symbol;Acc:MGI:1890444]	0.629235	2.96667	6.05735	0.0138485	0.0336571	-0.542116	2.96667	4.23465	0.0396068	0.0864636
ENSMUSG00000040536	69352	Necab1	N-terminal EF-hand calcium binding protein 1 [Source:MGI Symbol;Acc:MGI:1916602]	0.531505	6.12081	5.37254	0.0204562	0.0461661	-0.866621	6.12081	14.016	0.000181262	0.00112534
ENSMUSG00000040591	228356	1110051M20Rik	RIKEN cDNA 1110051M20 gene [Source:MGI Symbol;Acc:MGI:1915079]	0.489741	6.87643	5.68211	0.0171387	0.0398485	-0.532536	6.87643	6.67258	0.00979074	0.0286032
ENSMUSG00000040653	76142	Ppp1r14c	protein phosphatase 1, regulatory (inhibitor) subunit 14c [Source:MGI Symbol;Acc:MGI:1923392]	0.516206	3.80343	5.85584	0.0155254	0.0368476	-1.0738	3.80343	23.3762	1.33214e-06	1.96023e-05
ENSMUSG00000040658	381101	Dnph1	2'-deoxynucleoside 5'-phosphate N-hydrolase 1 [Source:MGI Symbol;Acc:MGI:3039376]	1.07552	1.72683	10.5161	0.0011834	0.00449842	-0.768462	1.72683	4.7407	0.0294572	0.0685839
ENSMUSG00000040675	270685	Mthfd1l	methylenetetrahydrofolate dehydrogenase (NADP+ dependent) 1-like [Source:MGI Symbol;Acc:MGI:1924836]	0.558237	4.20231	6.52439	0.0106405	0.0271351	-0.71581	4.20231	10.284	0.00134189	0.00575268
ENSMUSG00000040843	226591	Tiprl	TIP41, TOR signalling pathway regulator-like (S. cerevisiae) [Source:MGI Symbol;Acc:MGI:1915087]	0.631941	5.9522	15.3318	9.01855e-05	0.000540644	-0.728842	5.9522	19.893	8.18984e-06	8.79543e-05
ENSMUSG00000041020	78283	Map7d2	MAP7 domain containing 2 [Source:MGI Symbol;Acc:MGI:1917474]	0.58854	7.9203	8.87411	0.00289244	0.00943981	-0.753614	7.9203	14.4306	0.000145422	0.000938838
ENSMUSG00000041079	53858	Rwdd2b	RWD domain containing 2B [Source:MGI Symbol;Acc:MGI:1858215]	0.451951	3.4181	4.64379	0.0311661	0.0648785	-1.05401	3.4181	22.8509	1.75071e-06	2.45554e-05
ENSMUSG00000041124	78100	Msantd4	Myb/SANT-like DNA-binding domain containing 4 with coiled-coils [Source:MGI Symbol;Acc:MGI:1925350]	0.478801	5.89728	7.56374	0.00595542	0.0170365	-0.528319	5.89728	9.0516	0.00262465	0.00984976
ENSMUSG00000041199	106707	Rpusd1	RNA pseudouridylate synthase domain containing 1 [Source:MGI Symbol;Acc:MGI:1919186]	0.82182	4.71989	18.9509	1.34125e-05	0.000112217	-0.407902	4.71989	4.55176	0.032885	0.0748603
ENSMUSG00000041203	68544	2310036O22Rik	RIKEN cDNA 2310036O22 gene [Source:MGI Symbol;Acc:MGI:1922833]	0.960719	4.80088	12.2666	0.00046114	0.00207668	-0.54025	4.80088	3.84849	0.0497907	0.104119
ENSMUSG00000041215	208146	Yeats2	YEATS domain containing 2 [Source:MGI Symbol;Acc:MGI:2447762]	0.586469	4.62964	7.6165	0.00578365	0.0166245	-0.5401	4.62964	6.30153	0.0120634	0.0338287
ENSMUSG00000041231	79560	Ublcp1	ubiquitin-like domain containing CTD phosphatase 1 [Source:MGI Symbol;Acc:MGI:1933105]	0.448559	4.93949	4.93895	0.026258	0.0563993	-0.717491	4.93949	12.2525	0.000464642	0.00243574
ENSMUSG00000041263	72296	Rusc1	RUN and SH3 domain containing 1 [Source:MGI Symbol;Acc:MGI:1919546]	0.904655	6.80543	13.6674	0.00021821	0.0011225	-0.661427	6.80543	7.31653	0.00683233	0.0213869
ENSMUSG00000041343	73845	Ankrd42	ankyrin repeat domain 42 [Source:MGI Symbol;Acc:MGI:1921095]	0.616262	2.66563	3.90907	0.0480263	0.0923159	-0.950457	2.66563	8.68627	0.00320616	0.0116188
ENSMUSG00000041351	110351	Rap1gap	Rap1 GTPase-activating protein [Source:MGI Symbol;Acc:MGI:109338]	0.434169	4.35758	4.12961	0.0421391	0.083104	-0.662953	4.35758	9.25366	0.00235025	0.00903476
ENSMUSG00000041420	17537	Meis3	Meis homeobox 3 [Source:MGI Symbol;Acc:MGI:108519]	0.454821	4.25794	4.11244	0.0425688	0.0837547	-0.537316	4.25794	5.55896	0.0183864	0.0475095
ENSMUSG00000041438	21771	Utp4	UTP4 small subunit processome component [Source:MGI Symbol;Acc:MGI:1096573]	0.514101	5.265	7.21515	0.00722909	0.0198884	-0.751535	5.265	14.9766	0.000108855	0.000739588
ENSMUSG00000041623	276852	D11Wsu47e	DNA segment, Chr 11, Wayne State University 47, expressed [Source:MGI Symbol;Acc:MGI:106356]	0.972231	2.43756	15.5712	7.94573e-05	0.000487348	-0.509305	2.43756	3.85839	0.0494979	0.103723
ENSMUSG00000041632	218506	Mrps27	mitochondrial ribosomal protein S27 [Source:MGI Symbol;Acc:MGI:1919064]	0.5252	4.46313	8.09121	0.00444804	0.0134274	-0.40973	4.46313	4.7541	0.0292286	0.0681554
ENSMUSG00000041716	100859931	Gm20604	predicted gene 20604 [Source:MGI Symbol;Acc:MGI:5305180]	1.10902	5.15457	18.4272	1.76522e-05	0.000139809	-0.880687	5.15457	11.4682	0.000707979	0.00343851
ENSMUSG00000041763	22019	Tpp2	tripeptidyl peptidase II [Source:MGI Symbol;Acc:MGI:102724]	0.363647	5.95396	3.95134	0.0468341	0.0904814	-0.728308	5.95396	15.5074	8.2183e-05	0.000587147
ENSMUSG00000041769	52432	Ppp2r2d	protein phosphatase 2, regulatory subunit B, delta [Source:MGI Symbol;Acc:MGI:1289252]	0.554991	5.52522	7.10432	0.00768984	0.0208834	-0.633578	5.52522	9.08358	0.00257915	0.00971596
ENSMUSG00000041774	69101	Ydjc	YdjC homolog (bacterial) [Source:MGI Symbol;Acc:MGI:1916351]	0.889135	2.80158	7.60329	0.00582619	0.0167267	-0.78728	2.80158	5.63224	0.0176331	0.0460167
ENSMUSG00000041837	50996	Pdcd7	programmed cell death 7 [Source:MGI Symbol;Acc:MGI:1859170]	0.607658	4.13716	6.04853	0.0139179	0.0337897	-1.0313	4.13716	16.503	4.85737e-05	0.000384896
ENSMUSG00000041923	319211	Nol4	nucleolar protein 4 [Source:MGI Symbol;Acc:MGI:2441684]	0.459496	5.8909	4.88726	0.0270556	0.0577722	-0.778973	5.8909	13.7601	0.000207699	0.00125149
ENSMUSG00000041959	20194	S100a10	S100 calcium binding protein A10 (calpactin) [Source:MGI Symbol;Acc:MGI:1339468]	1.72177	5.40208	34.8414	3.57691e-09	1.05825e-07	-0.708691	5.40208	6.05706	0.0138508	0.03786
ENSMUSG00000042032	108645	Mat2b	methionine adenosyltransferase II, beta [Source:MGI Symbol;Acc:MGI:1913667]	0.86431	8.05441	14.9296	0.000111597	0.000646645	-0.990815	8.05441	19.4632	1.02557e-05	0.000106001
ENSMUSG00000042097	22685	Zfp239	zinc finger protein 239 [Source:MGI Symbol;Acc:MGI:1306812]	0.475565	5.7076	6.15058	0.0131369	0.0322274	-0.534247	5.7076	7.64734	0.00568561	0.0185124
ENSMUSG00000042111	69668	Ccdc115	coiled-coil domain containing 115 [Source:MGI Symbol;Acc:MGI:1916918]	0.682474	3.584	9.45332	0.00210768	0.00725703	-0.903848	3.584	15.4498	8.47258e-05	0.000601217
ENSMUSG00000042133	228005	Ppig	peptidyl-prolyl isomerase G (cyclophilin G) [Source:MGI Symbol;Acc:MGI:2445173]	0.436144	6.67967	4.53011	0.0333034	0.0685183	-0.526217	6.67967	6.53597	0.0105715	0.0303814
ENSMUSG00000042229	98710	Rabif	RAB interacting factor [Source:MGI Symbol;Acc:MGI:2138605]	0.638521	5.90971	9.86881	0.00168104	0.00600371	-0.827342	5.90971	16.2393	5.5824e-05	0.000430353
ENSMUSG00000042275	105083	Pelo	pelota homolog (Drosophila) [Source:MGI Symbol;Acc:MGI:2145154]	1.0823	3.54832	20.1666	7.09811e-06	6.65944e-05	-0.517505	3.54832	4.40363	0.0358625	0.0800737
ENSMUSG00000042303	105835	Sgsm3	small G protein signaling modulator 3 [Source:MGI Symbol;Acc:MGI:1916329]	0.589701	5.81234	7.30107	0.00689135	0.019168	-0.491099	5.81234	5.01866	0.0250756	0.0607385
ENSMUSG00000042305	57439	Tmem183a	transmembrane protein 183A [Source:MGI Symbol;Acc:MGI:1914729]	0.677168	5.97703	9.91617	0.00163833	0.00587355	-0.427196	5.97703	3.92306	0.0476281	0.100625
ENSMUSG00000042354	30877	Gnl3	guanine nucleotide binding protein-like 3 (nucleolar) [Source:MGI Symbol;Acc:MGI:1353651]	0.475909	5.14982	5.2679	0.0217222	0.0485141	-0.791182	5.14982	14.1381	0.000169871	0.00106766
ENSMUSG00000042502	70233	Cd2bp2	CD2 antigen (cytoplasmic tail) binding protein 2 [Source:MGI Symbol;Acc:MGI:1917483]	0.437675	5.1498	6.31171	0.0119943	0.0299947	-0.422811	5.1498	5.73942	0.0165883	0.0437736
ENSMUSG00000042505	71238	Sdhaf3	succinate dehydrogenase complex assembly factor 3 [Source:MGI Symbol;Acc:MGI:1913288]	0.709657	4.18317	6.2851	0.0121757	0.0303669	-0.941238	4.18317	10.6778	0.00108431	0.00485838
ENSMUSG00000042558	100206	Adprhl2	ADP-ribosylhydrolase like 2 [Source:MGI Symbol;Acc:MGI:2140364]	0.686233	2.94987	9.26293	0.00233839	0.00790539	-0.460658	2.94987	3.88277	0.0487841	0.102551
ENSMUSG00000042572	70093	Ube2q1	ubiquitin-conjugating enzyme E2Q family member 1 [Source:MGI Symbol;Acc:MGI:1917343]	0.494116	6.06401	5.76585	0.0163406	0.0383375	-0.612308	6.06401	8.73037	0.00312952	0.0113903
ENSMUSG00000042605	20239	Atxn2	ataxin 2 [Source:MGI Symbol;Acc:MGI:1277223]	0.414945	6.65944	6.06572	0.013783	0.0335233	-0.428988	6.65944	6.42672	0.0112416	0.0319967
ENSMUSG00000042606	233876	Hirip3	HIRA interacting protein 3 [Source:MGI Symbol;Acc:MGI:2142364]	0.949749	3.82208	11.589	0.000663413	0.00278567	-0.780019	3.82208	7.54926	0.00600348	0.0193633
ENSMUSG00000042712	22381	Tceal9	transcription elongation factor A like 9 [Source:MGI Symbol;Acc:MGI:109567]	0.618151	6.47041	7.94151	0.00483134	0.0143877	-0.865117	6.47041	15.3085	9.13049e-05	0.00064139
ENSMUSG00000042729	107071	Wdr74	WD repeat domain 74 [Source:MGI Symbol;Acc:MGI:2147427]	0.761929	4.89978	19.1235	1.22526e-05	0.000104087	-0.489517	4.89978	7.64188	0.00570285	0.0185614
ENSMUSG00000042814	66405	Mcts2	malignant T cell amplified sequence 2 [Source:MGI Symbol;Acc:MGI:1913655]	0.689119	4.09161	6.71375	0.00956724	0.0249247	-0.632934	4.09161	5.50943	0.0189142	0.0485369
ENSMUSG00000042992	67774	Borcs5	BLOC-1 related complex subunit 5 [Source:MGI Symbol;Acc:MGI:1915024]	1.04298	3.34956	20.5003	5.96234e-06	5.7581e-05	-0.623894	3.34956	6.87097	0.00876071	0.0261357
ENSMUSG00000043165	16939	Lor	loricrin [Source:MGI Symbol;Acc:MGI:96816]	1.09853	1.10592	7.79769	0.00523131	0.0153124	-0.959871	1.10592	5.15522	0.0231765	0.0569985
ENSMUSG00000043190	218341	Rfesd	Rieske (Fe-S) domain containing [Source:MGI Symbol;Acc:MGI:2145198]	0.920945	3.83073	15.2326	9.50503e-05	0.000565615	-0.499568	3.83073	4.32777	0.0374953	0.0829051
ENSMUSG00000043284	216821	Tmem11	transmembrane protein 11 [Source:MGI Symbol;Acc:MGI:2144726]	0.800027	4.92124	15.5613	7.98711e-05	0.000489349	-0.600759	4.92124	8.56461	0.0034276	0.0122362
ENSMUSG00000043415	71198	Otud1	OTU domain containing 1 [Source:MGI Symbol;Acc:MGI:1918448]	0.580385	4.49782	5.50994	0.0189087	0.0431968	-1.04122	4.49782	16.9526	3.83251e-05	0.000315149
ENSMUSG00000043419	NA	Chd3os	chromodomain helicase DNA binding protein 3, opposite strand [Source:MGI Symbol;Acc:MGI:1915359]	0.724471	6.49983	11.7796	0.000598838	0.00256525	-0.554122	6.49983	6.85949	0.00881715	0.02629
ENSMUSG00000043510	100900	Hscb	HscB iron-sulfur cluster co-chaperone [Source:MGI Symbol;Acc:MGI:2141135]	0.970942	2.87972	15.1756	9.79635e-05	0.000579865	-0.632551	2.87972	5.92093	0.014962	0.0403067
ENSMUSG00000043542	67306	Zc2hc1a	zinc finger, C2HC-type containing 1A [Source:MGI Symbol;Acc:MGI:1914556]	0.69001	6.97846	12.5953	0.000386726	0.00180153	-1.01423	6.97846	26.6906	2.38782e-07	4.75156e-06
ENSMUSG00000043602	193043	Zfp3	zinc finger protein 3 [Source:MGI Symbol;Acc:MGI:99177]	0.805359	2.00228	9.92743	0.00162833	0.00585161	-0.566091	2.00228	4.345	0.0371178	0.0823034
ENSMUSG00000043831	75099	Lysmd4	LysM, putative peptidoglycan-binding, domain containing 4 [Source:MGI Symbol;Acc:MGI:1922349]	0.713696	4.30664	15.2824	9.25736e-05	0.000552641	-0.58837	4.30664	9.89486	0.00165741	0.00680447
ENSMUSG00000044018	28028	Mrpl50	mitochondrial ribosomal protein L50 [Source:MGI Symbol;Acc:MGI:107329]	0.839546	6.34867	15.6346	7.68366e-05	0.000475271	-0.586715	6.34867	7.61239	0.00579685	0.0188162
ENSMUSG00000044030	272359	Irf2bp1	interferon regulatory factor 2 binding protein 1 [Source:MGI Symbol;Acc:MGI:2442159]	0.812254	3.98616	9.11124	0.00254044	0.00848078	-0.980128	3.98616	12.6461	0.000376357	0.00204515
ENSMUSG00000044068	22183	Zrsr1	zinc finger (CCCH type), RNA binding motif and serine/arginine rich 1 [Source:MGI Symbol;Acc:MGI:98885]	0.739358	5.29314	10.7244	0.00105732	0.0040962	-0.814278	5.29314	12.7104	0.000363621	0.00199599
ENSMUSG00000044117	67254	2900011O08Rik	RIKEN cDNA 2900011O08 gene [Source:MGI Symbol;Acc:MGI:1914504]	0.961401	8.73896	21.7132	3.1661e-06	3.37429e-05	-0.650188	8.73896	10.0052	0.00156101	0.0064819
ENSMUSG00000044125	NA	9530080O11Rik	RIKEN cDNA 9530080O11 gene [Source:MGI Symbol;Acc:MGI:2441751]	1.06279	0.969306	9.31122	0.00227755	0.00772659	-0.988805	0.969306	6.67131	0.00979769	0.0286105
ENSMUSG00000044147	11845	Arf6	ADP-ribosylation factor 6 [Source:MGI Symbol;Acc:MGI:99435]	0.851941	5.56907	11.7143	0.000620208	0.00263372	-0.881584	5.56907	12.3334	0.000444921	0.0023485
ENSMUSG00000044149	77286	Nkrf	NF-kappaB repressing factor [Source:MGI Symbol;Acc:MGI:1924536]	0.613315	4.9178	7.56874	0.00593892	0.0170009	-1.04086	4.9178	20.9328	4.75668e-06	5.6074e-05
ENSMUSG00000044155	76522	Lsm8	LSM8 homolog, U6 small nuclear RNA associated [Source:MGI Symbol;Acc:MGI:1923772]	0.738542	5.58621	10.4231	0.00124448	0.00468287	-1.13787	5.58621	23.9404	9.93642e-07	1.53767e-05
ENSMUSG00000044221	231413	Grsf1	G-rich RNA sequence binding factor 1 [Source:MGI Symbol;Acc:MGI:106479]	0.680975	6.91227	11.5347	0.000683092	0.00285473	-0.600192	6.91227	8.91392	0.00283005	0.0104892
ENSMUSG00000044231	105193	Nhlrc1	NHL repeat containing 1 [Source:MGI Symbol;Acc:MGI:2145264]	0.541192	4.28325	5.70287	0.0169372	0.0394943	-0.525244	4.28325	5.21862	0.0223462	0.0553676
ENSMUSG00000044252	64291	Osbpl1a	oxysterol binding protein-like 1A [Source:MGI Symbol;Acc:MGI:1927551]	0.649025	8.83707	10.0654	0.00151082	0.00550596	-0.514151	8.83707	6.32499	0.0119048	0.0334736
ENSMUSG00000044442	67768	N6amt1	N-6 adenine-specific DNA methyltransferase 1 (putative) [Source:MGI Symbol;Acc:MGI:1915018]	0.478483	5.06432	7.34194	0.00673641	0.0188559	-0.677125	5.06432	14.2026	0.000164142	0.00103572
ENSMUSG00000044469	66443	Tnfaip8l1	tumor necrosis factor, alpha-induced protein 8-like 1 [Source:MGI Symbol;Acc:MGI:1913693]	0.983751	2.83564	10.9386	0.000941817	0.00372442	-0.64449	2.83564	4.44169	0.0350715	0.07879
ENSMUSG00000044550	594844	Tceal3	transcription elongation factor A (SII)-like 3 [Source:MGI Symbol;Acc:MGI:1913354]	1.21444	4.3064	28.8867	7.67367e-08	1.4415e-06	-0.533759	4.3064	5.45304	0.0195343	0.0497702
ENSMUSG00000044629	380686	Cnrip1	cannabinoid receptor interacting protein 1 [Source:MGI Symbol;Acc:MGI:1917505]	0.931674	7.6283	19.0636	1.26432e-05	0.000107123	-0.842865	7.6283	15.5737	7.93497e-05	0.000571529
ENSMUSG00000044709	69731	Gemin7	gem (nuclear organelle) associated protein 7 [Source:MGI Symbol;Acc:MGI:1916981]	0.883427	3.87278	17.9694	2.24488e-05	0.000170707	-0.481069	3.87278	5.08972	0.0240681	0.0587116
ENSMUSG00000044715	66787	Gskip	GSK3B interacting protein [Source:MGI Symbol;Acc:MGI:1914037]	0.853178	5.65408	11.3364	0.000760009	0.00311286	-0.890234	5.65408	12.164	0.000487205	0.00252795
ENSMUSG00000044763	52575	Trmt10c	tRNA methyltransferase 10C [Source:MGI Symbol;Acc:MGI:1196261]	0.618118	3.49323	7.27779	0.00698124	0.0193731	-1.07497	3.49323	20.1883	7.01805e-06	7.71161e-05
ENSMUSG00000044792	69046	Isca1	iron-sulfur cluster assembly 1 [Source:MGI Symbol;Acc:MGI:1916296]	0.691892	5.82463	12.6842	0.000368768	0.0017328	-0.795959	5.82463	16.4289	5.05095e-05	0.000395564
ENSMUSG00000044816	98303	D630023F18Rik	RIKEN cDNA D630023F18 gene [Source:MGI Symbol;Acc:MGI:2138198]	0.689982	3.3965	6.1534	0.013116	0.0321949	-0.689318	3.3965	5.87753	0.0153353	0.0410614
ENSMUSG00000044876	72667	Zfp444	zinc finger protein 444 [Source:MGI Symbol;Acc:MGI:1923365]	0.703575	3.52162	8.21928	0.00414476	0.0126993	-0.683744	3.52162	7.36535	0.00664925	0.0209506
ENSMUSG00000045248	70625	Med26	mediator complex subunit 26 [Source:MGI Symbol;Acc:MGI:1917875]	0.593193	2.49354	5.18091	0.0228364	0.0504059	-1.09349	2.49354	15.5164	8.17907e-05	0.000585092
ENSMUSG00000045252	232976	Zfp574	zinc finger protein 574 [Source:MGI Symbol;Acc:MGI:2442951]	0.742203	2.80792	10.1999	0.00140451	0.00518616	-0.480015	2.80792	3.9266	0.0475281	0.100477
ENSMUSG00000045273	26886	Cenph	centromere protein H [Source:MGI Symbol;Acc:MGI:1349448]	1.21154	0.0202448	7.07921	0.00779833	0.0211404	-1.16822	0.0202448	4.91066	0.0266914	0.0636639
ENSMUSG00000045284	245404	Dcaf12l1	DDB1 and CUL4 associated factor 12-like 1 [Source:MGI Symbol;Acc:MGI:2444462]	0.585143	6.09118	10.7709	0.00103106	0.00401859	-0.682332	6.09118	14.3706	0.000150128	0.000961587
ENSMUSG00000045288	16470	Ush1g	USH1 protein network component sans [Source:MGI Symbol;Acc:MGI:2450757]	1.12902	-1.13716	3.93935	0.0471689	0.0909806	-1.45278	-1.13716	3.87113	0.0491234	0.103061
ENSMUSG00000045302	50907	Preb	prolactin regulatory element binding [Source:MGI Symbol;Acc:MGI:1355326]	0.606488	5.63629	10.1438	0.0014479	0.00532176	-0.616332	5.63629	10.2856	0.0013407	0.0057505
ENSMUSG00000045314	78088	Sowahb	sosondowah ankyrin repeat domain family member B [Source:MGI Symbol;Acc:MGI:1925338]	0.771632	3.56223	11.5654	0.00067189	0.00281492	-0.750491	3.56223	10.2458	0.00136998	0.00584771
ENSMUSG00000045427	56258	Hnrnph2	heterogeneous nuclear ribonucleoprotein H2 [Source:MGI Symbol;Acc:MGI:1201779]	0.677746	6.07421	10.8885	0.00096762	0.00381476	-0.524346	6.07421	6.46738	0.0109873	0.0314096
ENSMUSG00000045438	68033	Cox19	cytochrome c oxidase assembly protein 19 [Source:MGI Symbol;Acc:MGI:1915283]	0.74635	5.01481	14.6553	0.000129072	0.000729264	-0.74412	5.01481	14.1395	0.000169738	0.00106762
ENSMUSG00000045598	233887	Zfp553	zinc finger protein 553 [Source:MGI Symbol;Acc:MGI:2384725]	1.01754	3.05137	14.0999	0.000173348	0.000931366	-0.65494	3.05137	5.49239	0.0190995	0.0489225
ENSMUSG00000045624	66580	Esf1	ESF1 nucleolar pre-rRNA processing protein homolog [Source:MGI Symbol;Acc:MGI:1913830]	0.578999	6.20217	12.3994	0.000429467	0.00195876	-0.469318	6.20217	8.03004	0.00460078	0.0155978
ENSMUSG00000045691	105663	Thtpa	thiamine triphosphatase [Source:MGI Symbol;Acc:MGI:2446078]	0.369129	4.47967	4.25071	0.039234	0.078286	-0.362654	4.47967	3.97521	0.0461747	0.0980854
ENSMUSG00000045763	70350	Basp1	brain abundant, membrane attached signal protein 1 [Source:MGI Symbol;Acc:MGI:1917600]	0.862674	8.09746	9.14928	0.00248816	0.00834112	-0.596409	8.09746	4.39782	0.035985	0.0802404
ENSMUSG00000045822	67538	Zswim3	zinc finger SWIM-type containing 3 [Source:MGI Symbol;Acc:MGI:1914788]	0.495258	3.04443	4.01886	0.044994	0.0876829	-0.875734	3.04443	11.6501	0.000642001	0.00317433
ENSMUSG00000045915	276920	Ccdc42	coiled-coil domain containing 42 [Source:MGI Symbol;Acc:MGI:3045254]	1.43911	0.464592	7.43738	0.0063883	0.018041	-1.30483	0.464592	5.12046	0.0236453	0.0579474
ENSMUSG00000045996	17749	Polr2k	polymerase (RNA) II (DNA directed) polypeptide K [Source:MGI Symbol;Acc:MGI:102725]	0.788684	2.13711	7.72721	0.00543949	0.0158123	-0.770374	2.13711	6.64879	0.0099223	0.0289271
ENSMUSG00000046010	66983	Zfp830	zinc finger protein 830 [Source:MGI Symbol;Acc:MGI:1914233]	0.863402	2.96687	11.4928	0.000698663	0.00290748	-0.600082	2.96687	5.19461	0.022657	0.0559588
ENSMUSG00000046032	55988	Snx12	sorting nexin 12 [Source:MGI Symbol;Acc:MGI:1919331]	0.461101	5.63189	6.35574	0.0117002	0.0294259	-0.501225	5.63189	7.37647	0.00660827	0.0208411
ENSMUSG00000046058	386655	Eid2	EP300 interacting inhibitor of differentiation 2 [Source:MGI Symbol;Acc:MGI:2681174]	1.00844	4.92027	11.0844	0.000870565	0.00348039	-1.03893	4.92027	11.5318	0.000684171	0.00334703
ENSMUSG00000046341	NA	Gm11223	predicted gene 11223 [Source:MGI Symbol;Acc:MGI:3651631]	1.53798	1.62734	24.9028	6.0296e-07	8.46415e-06	-0.730611	1.62734	4.78059	0.0287823	0.0673844
ENSMUSG00000046432	12070	Bex3	brain expressed X-linked 3 [Source:MGI Symbol;Acc:MGI:1338016]	1.27995	7.81833	27.137	1.89533e-07	3.12321e-06	-0.584744	7.81833	5.786	0.0161543	0.0428508
ENSMUSG00000046550	278240	Spin2c	spindlin family, member 2C [Source:MGI Symbol;Acc:MGI:3605548]	0.598221	3.4732	4.57213	0.0324962	0.0671194	-1.08012	3.4732	14.0014	0.000182675	0.00113118
ENSMUSG00000046585	381229	Cfap58	cilia and flagella associated protein 58 [Source:MGI Symbol;Acc:MGI:2685815]	1.00942	0.0605875	5.23779	0.0221013	0.0491644	-1.23906	0.0605875	5.9858	0.0144215	0.0391132
ENSMUSG00000046668	67393	Cxxc5	CXXC finger 5 [Source:MGI Symbol;Acc:MGI:1914643]	1.00043	4.77681	17.2793	3.22688e-05	0.000230443	-0.546147	4.77681	5.08396	0.0241482	0.0588703
ENSMUSG00000046707	13000	Csnk2a2	casein kinase 2, alpha prime polypeptide [Source:MGI Symbol;Acc:MGI:88547]	0.622539	5.25879	9.96175	0.00159826	0.00576453	-0.566797	5.25879	8.08997	0.00445109	0.0152071
ENSMUSG00000046791	71952	Riox1	ribosomal oxygenase 1 [Source:MGI Symbol;Acc:MGI:1919202]	1.13909	3.66523	18.4042	1.78667e-05	0.000141108	-0.775366	3.66523	8.17234	0.00425339	0.014642
ENSMUSG00000046844	270097	Vat1l	vesicle amine transport protein 1 like [Source:MGI Symbol;Acc:MGI:2142534]	0.891908	5.59286	25.6403	4.11367e-07	6.10835e-06	-0.6196	5.59286	12.1448	0.000492245	0.00255094
ENSMUSG00000046854	227733	Pip5kl1	phosphatidylinositol-4-phosphate 5-kinase-like 1 [Source:MGI Symbol;Acc:MGI:2448520]	0.710576	2.11871	7.49283	0.00619452	0.0175856	-0.93984	2.11871	11.404	0.000732858	0.00354387
ENSMUSG00000047084	83485	Ngrn	neugrin, neurite outgrowth associated [Source:MGI Symbol;Acc:MGI:1933212]	0.813071	4.62503	15.5442	8.05979e-05	0.000492364	-0.493426	4.62503	5.57152	0.0182549	0.0472643
ENSMUSG00000047187	59021	Rab2a	RAB2A, member RAS oncogene family [Source:MGI Symbol;Acc:MGI:1928750]	0.459337	7.75925	4.03932	0.0444518	0.0868179	-0.677183	7.75925	8.71152	0.00316206	0.0114937
ENSMUSG00000047228	232400	A2ml1	alpha-2-macroglobulin like 1 [Source:MGI Symbol;Acc:MGI:3039594]	1.91749	6.50829	37.2636	1.03194e-09	3.71477e-08	-0.791957	6.50829	6.66004	0.00985988	0.0287801
ENSMUSG00000047261	14432	Gap43	growth associated protein 43 [Source:MGI Symbol;Acc:MGI:95639]	1.55377	8.671	37.1701	1.08259e-09	3.84755e-08	-0.605683	8.671	5.85746	0.0155112	0.0414926
ENSMUSG00000047342	192651	Zfp286	zinc finger protein 286 [Source:MGI Symbol;Acc:MGI:2384758]	0.433266	4.12454	4.0721	0.0435971	0.085427	-0.952088	4.12454	18.6097	1.60404e-05	0.000152711
ENSMUSG00000047363	78617	Cstad	CSA-conditional, T cell activation-dependent protein [Source:MGI Symbol;Acc:MGI:1925867]	0.946973	2.93755	7.8828	0.0049907	0.0147627	-0.929878	2.93755	7.23112	0.00716506	0.0222293
ENSMUSG00000047423	107242	AI837181	expressed sequence AI837181 [Source:MGI Symbol;Acc:MGI:2147598]	0.847103	4.94001	15.3626	8.87275e-05	0.000534053	-0.437563	4.94001	4.04241	0.0443703	0.0947685
ENSMUSG00000047454	268566	Gphn	gephyrin [Source:MGI Symbol;Acc:MGI:109602]	0.419511	6.64873	5.2337	0.0221534	0.0492477	-0.426688	6.64873	5.37427	0.0204358	0.0515428
ENSMUSG00000047473	22693	Zfp30	zinc finger protein 30 [Source:MGI Symbol;Acc:MGI:99178]	0.557696	4.28221	8.07356	0.00449159	0.0135296	-0.544259	4.28221	7.39618	0.00653626	0.0206645
ENSMUSG00000047514	22110	Tspyl1	testis-specific protein, Y-encoded-like 1 [Source:MGI Symbol;Acc:MGI:1298395]	0.86016	8.27162	10.7669	0.00103332	0.00402365	-0.982323	8.27162	13.9515	0.000187586	0.00115392
ENSMUSG00000047547	74325	Cltb	clathrin, light polypeptide (Lcb) [Source:MGI Symbol;Acc:MGI:1921575]	1.10011	6.97212	26.0568	3.31515e-07	5.05101e-06	-0.474634	6.97212	4.90703	0.0267476	0.0637618
ENSMUSG00000047613	97159	A430005L14Rik	RIKEN cDNA A430005L14 gene [Source:MGI Symbol;Acc:MGI:2140680]	1.20509	3.7852	34.1823	5.01837e-09	1.405e-07	-0.721398	3.7852	11.4835	0.000702176	0.00341916
ENSMUSG00000047669	73390	Msl3l2	male-specific lethal 3-like 2 (Drosophila) [Source:MGI Symbol;Acc:MGI:1920640]	0.612878	3.32103	4.10733	0.0426978	0.083969	-0.909267	3.32103	8.57627	0.00340572	0.0121788
ENSMUSG00000047766	102747	Lrrc49	leucine rich repeat containing 49 [Source:MGI Symbol;Acc:MGI:2442689]	0.371038	5.34198	4.45799	0.0347383	0.0707976	-0.896617	5.34198	25.0289	5.64781e-07	9.59899e-06
ENSMUSG00000047824	68911	Pygo2	pygopus 2 [Source:MGI Symbol;Acc:MGI:1916161]	0.84465	4.08619	17.6164	2.70249e-05	0.000199304	-0.45921	4.08619	4.98516	0.0255656	0.061599
ENSMUSG00000047879	59025	Usp14	ubiquitin specific peptidase 14 [Source:MGI Symbol;Acc:MGI:1928898]	0.633195	7.66776	9.03328	0.00265108	0.00878718	-0.796127	7.66776	14.1602	0.000167886	0.00105637
ENSMUSG00000047897	382089	Ripply2	ripply transcriptional repressor 2 [Source:MGI Symbol;Acc:MGI:2685968]	1.2923	0.956627	10.9055	0.00095879	0.00378262	-0.848612	0.956627	4.00797	0.0452857	0.0964779
ENSMUSG00000047945	17357	Marcksl1	MARCKS-like 1 [Source:MGI Symbol;Acc:MGI:97143]	0.784675	6.56402	5.04586	0.0246848	0.0536591	-0.89987	6.56402	6.58259	0.0102981	0.029718
ENSMUSG00000048029	226265	Eno4	enolase 4 [Source:MGI Symbol;Acc:MGI:2441717]	0.56207	1.61938	4.52379	0.0334266	0.0686834	-0.791536	1.61938	7.62338	0.00576165	0.0187198
ENSMUSG00000048215	NA	A630023P12Rik	RIKEN cDNA A630023P12 gene [Source:MGI Symbol;Acc:MGI:2445162]	1.1009	1.81526	9.41339	0.00215406	0.00739096	-1.28432	1.81526	11.1649	0.000833578	0.00393562
ENSMUSG00000048281	239133	Dleu7	deleted in lymphocytic leukemia, 7 [Source:MGI Symbol;Acc:MGI:2447771]	1.28556	2.52771	13.963	0.000186439	0.000989722	-0.839081	2.52771	5.57692	0.0181987	0.047148
ENSMUSG00000048307	68839	Ankrd46	ankyrin repeat domain 46 [Source:MGI Symbol;Acc:MGI:1916089]	0.516728	8.30932	7.85917	0.00505636	0.0148991	-0.63403	8.30932	11.767	0.00060291	0.00301635
ENSMUSG00000048351	69893	Coa7	cytochrome c oxidase assembly factor 7 [Source:MGI Symbol;Acc:MGI:1917143]	0.375609	5.12237	4.77137	0.0289368	0.0609971	-0.419346	5.12237	5.80465	0.0159839	0.0424861
ENSMUSG00000048439	231042	Nupl2	nucleoporin like 2 [Source:MGI Symbol;Acc:MGI:2387631]	0.554499	3.11244	4.10014	0.0428796	0.0842673	-0.888058	3.11244	9.85064	0.00169772	0.00693265
ENSMUSG00000048458	109050	Fam212b	family with sequence similarity 212, member B [Source:MGI Symbol;Acc:MGI:1923497]	0.739271	6.59735	16.3809	5.18042e-05	0.000342537	-0.737305	6.59735	16.1087	5.98086e-05	0.000452952
ENSMUSG00000048495	68736	Tyw5	tRNA-yW synthesizing protein 5 [Source:MGI Symbol;Acc:MGI:1915986]	0.663301	4.47518	7.31465	0.00683948	0.0190673	-0.801386	4.47518	10.3283	0.00131004	0.00565224
ENSMUSG00000049086	107771	Bmyc	brain expressed myelocytomatosis oncogene [Source:MGI Symbol;Acc:MGI:88184]	1.2838	3.91329	19.9285	8.03948e-06	7.36276e-05	-0.669191	3.91329	5.31282	0.021169	0.0530095
ENSMUSG00000049091	20768	Sephs2	selenophosphate synthetase 2 [Source:MGI Symbol;Acc:MGI:108388]	0.78767	3.13181	8.19026	0.00421158	0.0128593	-1.18157	3.13181	16.8377	4.07174e-05	0.000332539
ENSMUSG00000049097	545554	Ankrd34a	ankyrin repeat domain 34A [Source:MGI Symbol;Acc:MGI:3617846]	0.812172	4.72114	7.96006	0.00478209	0.0142621	-0.796826	4.72114	7.52746	0.00607654	0.01955
ENSMUSG00000049119	242297	Fam110b	family with sequence similarity 110, member B [Source:MGI Symbol;Acc:MGI:1916593]	0.417907	5.11689	4.0443	0.0443208	0.0866226	-0.72083	5.11689	11.7109	0.000621342	0.00308922
ENSMUSG00000049232	68140	Tigd2	tigger transposable element derived 2 [Source:MGI Symbol;Acc:MGI:1915390]	0.92119	4.17678	16.6237	4.55771e-05	0.000307545	-0.735804	4.17678	10.1958	0.00140763	0.00597043
ENSMUSG00000049536	237052	Tceal1	transcription elongation factor A (SII)-like 1 [Source:MGI Symbol;Acc:MGI:2385317]	0.581937	5.13126	6.15126	0.0131319	0.0322199	-0.846914	5.13126	12.6837	0.000368863	0.00201487
ENSMUSG00000049643	66367	2310022A10Rik	RIKEN cDNA 2310022A10 gene [Source:MGI Symbol;Acc:MGI:1913617]	0.818994	3.58058	12.9046	0.000327771	0.00157276	-0.589619	3.58058	6.35513	0.0117042	0.0330424
ENSMUSG00000049717	319583	Lig4	ligase IV, DNA, ATP-dependent [Source:MGI Symbol;Acc:MGI:1335098]	0.535056	3.70127	7.53201	0.00606122	0.0172656	-0.705577	3.70127	12.1946	0.000479277	0.00249918
ENSMUSG00000049744	76117	Arhgap15	Rho GTPase activating protein 15 [Source:MGI Symbol;Acc:MGI:1923367]	0.922185	4.92065	12.3562	0.000439535	0.00199545	-0.99192	4.92065	13.9447	0.000188264	0.00115725
ENSMUSG00000049792	70369	Bag5	BCL2-associated athanogene 5 [Source:MGI Symbol;Acc:MGI:1917619]	0.729442	5.71759	16.1739	5.77857e-05	0.000376136	-0.699359	5.71759	14.5743	0.000134737	0.000884972
ENSMUSG00000049882	207965	Vcpkmt	valosin containing protein lysine (K) methyltransferase [Source:MGI Symbol;Acc:MGI:2684917]	0.903742	3.31325	13.5227	0.000235698	0.00119813	-0.746212	3.31325	8.608	0.00334689	0.0119966
ENSMUSG00000049907	68939	Rasl11b	RAS-like, family 11, member B [Source:MGI Symbol;Acc:MGI:1916189]	0.471543	5.94425	4.61498	0.0316939	0.0657879	-0.893928	5.94425	16.212	5.66332e-05	0.00043559
ENSMUSG00000049946	234290	BC030500	cDNA sequence BC030500 [Source:MGI Symbol;Acc:MGI:2447770]	0.774542	3.32746	9.79411	0.00175072	0.00621551	-0.794593	3.32746	9.69977	0.00184291	0.00740121
ENSMUSG00000049950	227522	Rpp38	ribonuclease P/MRP 38 subunit [Source:MGI Symbol;Acc:MGI:2443607]	0.490862	3.68847	3.92141	0.047675	0.0917668	-0.893192	3.68847	12.2843	0.000456789	0.00239832
ENSMUSG00000050071	19716	Bex1	brain expressed X-linked 1 [Source:MGI Symbol;Acc:MGI:1328321]	1.13046	4.7225	18.706	1.52501e-05	0.000124064	-0.608067	4.7225	5.37064	0.0204784	0.0515932
ENSMUSG00000050213	76793	Snip1	Smad nuclear interacting protein 1 [Source:MGI Symbol;Acc:MGI:2156003]	0.72684	3.80473	8.13998	0.00432998	0.01313	-0.943006	3.80473	12.9962	0.000312118	0.00175993
ENSMUSG00000050379	56526	2018-09-06	septin 6 [Source:MGI Symbol;Acc:MGI:1888939]	0.69009	6.56527	12.818	0.000343298	0.00163265	-0.734662	6.56527	14.355	0.000151373	0.000967716
ENSMUSG00000050555	76832	Hyls1	HYLS1, centriolar and ciliogenesis associated [Source:MGI Symbol;Acc:MGI:1924082]	0.673228	2.28594	6.53946	0.0105507	0.0269636	-1.09175	2.28594	15.0049	0.000107233	0.000729748
ENSMUSG00000050627	333433	Gpd1l	glycerol-3-phosphate dehydrogenase 1-like [Source:MGI Symbol;Acc:MGI:1289257]	0.387285	6.47668	4.46935	0.034508	0.0704739	-0.420529	6.47668	5.21769	0.0223583	0.0553676
ENSMUSG00000050821	78408	Fam131a	family with sequence similarity 131, member A [Source:MGI Symbol;Acc:MGI:1925658]	1.21645	7.4889	27.0796	1.95244e-07	3.19845e-06	-0.47597	7.4889	4.2276	0.0397716	0.0867354
ENSMUSG00000050875	225583	A730017C20Rik	RIKEN cDNA A730017C20 gene [Source:MGI Symbol;Acc:MGI:2442934]	0.566029	6.59179	6.48844	0.0108578	0.0276262	-0.977779	6.59179	18.972	1.32654e-05	0.000130821
ENSMUSG00000050926	245403	Dcaf12l2	DDB1 and CUL4 associated factor 12-like 2 [Source:MGI Symbol;Acc:MGI:2445178]	0.601404	2.10044	3.99112	0.0457407	0.0888462	-0.744164	2.10044	5.55324	0.0184465	0.0476355
ENSMUSG00000050973	269952	Gdpgp1	GDP-D-glucose phosphorylase 1 [Source:MGI Symbol;Acc:MGI:2443429]	0.450885	3.30009	4.8007	0.0284482	0.0601376	-0.801935	3.30009	13.994	0.000183398	0.00113452
ENSMUSG00000051169	101122	Rpusd3	RNA pseudouridylate synthase domain containing 3 [Source:MGI Symbol;Acc:MGI:2141440]	0.929133	2.37163	11.571	0.000669885	0.00280723	-0.607227	2.37163	4.51595	0.0335802	0.0760815
ENSMUSG00000051234	19823	Rnf7	ring finger protein 7 [Source:MGI Symbol;Acc:MGI:1337096]	0.64936	6.19799	8.01525	0.00463851	0.0138923	-0.50517	6.19799	4.82429	0.0280613	0.066051
ENSMUSG00000051246	403174	Msantd1	Myb/SANT-like DNA-binding domain containing 1 [Source:MGI Symbol;Acc:MGI:2684990]	1.04262	1.53308	12.2848	0.000456674	0.00206044	-0.842395	1.53308	6.74077	0.0094234	0.0277086
ENSMUSG00000051346	66701	Spryd4	SPRY domain containing 4 [Source:MGI Symbol;Acc:MGI:1913951]	0.611	3.7786	10.2898	0.00133771	0.00497341	-0.601223	3.7786	9.35853	0.0022195	0.00864655
ENSMUSG00000051456	56534	Hspb3	heat shock protein 3 [Source:MGI Symbol;Acc:MGI:1928479]	1.01906	2.40204	10.1629	0.00143298	0.0052727	-0.649644	2.40204	3.87332	0.0490595	0.103
ENSMUSG00000051518	66538	Rps19bp1	ribosomal protein S19 binding protein 1 [Source:MGI Symbol;Acc:MGI:1913788]	1.2947	3.67392	18.2297	1.95798e-05	0.00015178	-0.614968	3.67392	4.03363	0.0446018	0.0952022
ENSMUSG00000051579	66684	Tceal8	transcription elongation factor A (SII)-like 8 [Source:MGI Symbol;Acc:MGI:1913934]	0.650002	6.00747	5.83177	0.0157393	0.0372393	-0.58889	6.00747	4.75699	0.0291796	0.06806
ENSMUSG00000051675	69807	Trim32	tripartite motif-containing 32 [Source:MGI Symbol;Acc:MGI:1917057]	0.687146	8.05926	11.2609	0.000791557	0.00322134	-0.743787	8.05926	13.1298	0.000290643	0.00165609
ENSMUSG00000051695	23983	Pcbp1	poly(rC) binding protein 1 [Source:MGI Symbol;Acc:MGI:1345635]	1.1249	6.50901	18.2895	1.89749e-05	0.000148048	-0.971289	6.50901	13.5991	0.000226292	0.00134481
ENSMUSG00000051736	66337	Fam229b	family with sequence similarity 229, member B [Source:MGI Symbol;Acc:MGI:1913587]	0.552782	5.04504	5.1119	0.0237623	0.0520178	-0.672779	5.04504	7.42565	0.00643008	0.0204045
ENSMUSG00000051934	72572	Spats2	spermatogenesis associated, serine-rich 2 [Source:MGI Symbol;Acc:MGI:1919822]	0.610006	4.89104	8.33635	0.00388596	0.0120438	-0.440533	4.89104	4.25928	0.0390364	0.08551
ENSMUSG00000051978	234086	Erich1	glutamate rich 1 [Source:MGI Symbol;Acc:MGI:3588201]	0.72223	2.56927	7.40621	0.00649991	0.0183038	-0.592734	2.56927	4.61078	0.0317716	0.0729295
ENSMUSG00000052033	109054	Pfdn4	prefoldin 4 [Source:MGI Symbol;Acc:MGI:1923512]	1.05975	5.53364	16.2205	5.63809e-05	0.000368154	-0.968219	5.53364	13.3719	0.000255423	0.00148879
ENSMUSG00000052102	26384	Gnpda1	glucosamine-6-phosphate deaminase 1 [Source:MGI Symbol;Acc:MGI:1347054]	0.385912	4.10251	4.75059	0.0292882	0.0616372	-0.505955	4.10251	7.78033	0.00528181	0.0174003
ENSMUSG00000052373	13384	Mpp3	membrane protein, palmitoylated 3 (MAGUK p55 subfamily member 3) [Source:MGI Symbol;Acc:MGI:1328354]	0.545792	5.3348	5.73896	0.0165926	0.0388528	-0.841226	5.3348	13.3035	0.000264906	0.00153658
ENSMUSG00000052488	27967	Cherp	calcium homeostasis endoplasmic reticulum protein [Source:MGI Symbol;Acc:MGI:106417]	0.750359	3.5533	12.4346	0.000421447	0.00193111	-0.727974	3.5533	10.9257	0.000948394	0.00435514
ENSMUSG00000052560	66871	Cpne8	copine VIII [Source:MGI Symbol;Acc:MGI:1914121]	0.511966	5.12084	8.51954	0.00351353	0.0110747	-0.709053	5.12084	15.7822	7.1067e-05	0.000521728
ENSMUSG00000052833	56459	Sae1	SUMO1 activating enzyme subunit 1 [Source:MGI Symbol;Acc:MGI:1929264]	1.16633	6.43037	41.1446	1.41374e-10	6.85419e-09	-0.441192	6.43037	5.92996	0.0148855	0.0401455
ENSMUSG00000052848	NA	C130026L21Rik	RIKEN cDNA C130026L21 gene [Source:MGI Symbol;Acc:MGI:3041189]	1.00837	2.27784	8.51903	0.00351451	0.0110757	-0.832904	2.27784	5.43356	0.0197534	0.0501836
ENSMUSG00000052889	18751	Prkcb	protein kinase C, beta [Source:MGI Symbol;Acc:MGI:97596]	0.490221	10.2943	4.45147	0.0348712	0.0710511	-0.519716	10.2943	4.99766	0.0253816	0.0612745
ENSMUSG00000052981	76980	Ube2ql1	ubiquitin-conjugating enzyme E2Q family-like 1 [Source:MGI Symbol;Acc:MGI:1924230]	1.00412	6.77299	23.703	1.12408e-06	1.40852e-05	-0.437511	6.77299	4.53204	0.0332659	0.0755327
ENSMUSG00000053111	66930	Fank1	fibronectin type 3 and ankyrin repeat domains 1 [Source:MGI Symbol;Acc:MGI:1914180]	0.8807	1.99563	8.75932	0.00308024	0.00993674	-0.947908	1.99563	8.93228	0.00280174	0.010398
ENSMUSG00000053192	56772	Mllt11	myeloid/lymphoid or mixed-lineage leukemia; translocated to, 11 [Source:MGI Symbol;Acc:MGI:1929671]	1.23439	9.67882	19.9448	7.97104e-06	7.31878e-05	-0.910145	9.67882	10.9773	0.00092234	0.00426939
ENSMUSG00000053289	77591	Ddx10	DEAD (Asp-Glu-Ala-Asp) box polypeptide 10 [Source:MGI Symbol;Acc:MGI:1924841]	0.385511	4.59984	4.4739	0.0344163	0.0703207	-0.809833	4.59984	18.7793	1.46755e-05	0.000142137
ENSMUSG00000053453	66231	Thoc7	THO complex 7 [Source:MGI Symbol;Acc:MGI:1913481]	0.824599	5.81956	15.7801	7.11484e-05	0.000447009	-0.560625	5.81956	7.23517	0.00714889	0.0221832
ENSMUSG00000053483	NA	Usp21	ubiquitin specific peptidase 21 [Source:MGI Symbol;Acc:MGI:1353665]	0.509841	4.66376	5.03559	0.0248317	0.0539085	-0.65096	4.66376	7.9849	0.00471691	0.015876
ENSMUSG00000053528	NA	A530021J07Rik	Riken cDNA A530021J07 gene [Source:MGI Symbol;Acc:MGI:3687211]	1.53706	-1.0139	8.6318	0.00330345	0.0105493	-1.57484	-1.0139	4.9512	0.0260725	0.0625167
ENSMUSG00000053553	73212	3110082I17Rik	RIKEN cDNA 3110082I17 gene [Source:MGI Symbol;Acc:MGI:1920462]	0.859784	2.28246	8.24599	0.00408422	0.0125573	-0.68349	2.28246	4.80852	0.0283194	0.0664789
ENSMUSG00000053801	101612	Grwd1	glutamate-rich WD repeat containing 1 [Source:MGI Symbol;Acc:MGI:2141989]	0.774053	3.34944	11.7231	0.00061728	0.00262365	-0.667616	3.34944	8.1115	0.00439852	0.0150521
ENSMUSG00000054079	217109	Utp18	UTP18 small subunit processome component [Source:MGI Symbol;Acc:MGI:1923402]	0.942909	4.35609	9.65823	0.00188505	0.00659541	-0.776151	4.35609	6.41063	0.0113439	0.0322423
ENSMUSG00000054237	70567	Fra10ac1	FRA10AC1 homolog (human) [Source:MGI Symbol;Acc:MGI:1917817]	0.827307	3.90231	13.5513	0.000232135	0.00118325	-0.666773	3.90231	8.40904	0.00373359	0.0131164
ENSMUSG00000054277	66251	Arfgap3	ADP-ribosylation factor GTPase activating protein 3 [Source:MGI Symbol;Acc:MGI:1913501]	0.782863	4.20786	15.8026	7.03048e-05	0.000442372	-0.587526	4.20786	8.50278	0.00354604	0.0125734
ENSMUSG00000054459	26950	Vsnl1	visinin-like 1 [Source:MGI Symbol;Acc:MGI:1349453]	1.06873	10.3864	12.9361	0.0003223	0.00155183	-0.89396	10.3864	9.10739	0.00254579	0.00962055
ENSMUSG00000054733	110265	Msra	methionine sulfoxide reductase A [Source:MGI Symbol;Acc:MGI:106916]	0.670582	5.77777	13.5715	0.000229643	0.00117268	-0.486586	5.77777	7.05177	0.00791871	0.0240995
ENSMUSG00000054855	223881	Rnd1	Rho family GTPase 1 [Source:MGI Symbol;Acc:MGI:2444878]	0.929032	3.37907	13.5038	0.00023808	0.00120695	-0.904735	3.37907	11.9556	0.000544825	0.00277373
ENSMUSG00000054889	109620	Dsp	desmoplakin [Source:MGI Symbol;Acc:MGI:109611]	1.3146	2.56811	23.3738	1.33382e-06	1.62799e-05	-0.848962	2.56811	8.69789	0.00318578	0.0115574
ENSMUSG00000054894	68055	Atp5s	ATP synthase, H+ transporting, mitochondrial F0 complex, subunit S [Source:MGI Symbol;Acc:MGI:1915305]	0.681029	4.10389	10.5032	0.00119168	0.00452681	-0.725881	4.10389	11.3404	0.000758384	0.00364733
ENSMUSG00000054931	544922	Zkscan4	zinc finger with KRAB and SCAN domains 4 [Source:MGI Symbol;Acc:MGI:3649412]	0.589993	2.25694	5.70088	0.0169564	0.0395158	-0.579405	2.25694	4.94513	0.0261643	0.0627189
ENSMUSG00000055044	54132	Pdlim1	PDZ and LIM domain 1 (elfin) [Source:MGI Symbol;Acc:MGI:1860611]	1.75732	3.68907	35.2152	2.95205e-09	9.11982e-08	-0.583638	3.68907	3.86133	0.049411	0.103583
ENSMUSG00000055067	69726	Smyd3	SET and MYND domain containing 3 [Source:MGI Symbol;Acc:MGI:1916976]	0.457231	5.59121	7.17464	0.00739413	0.0202343	-0.377222	5.59121	4.80088	0.0284451	0.0666993
ENSMUSG00000055116	11865	Arntl	aryl hydrocarbon receptor nuclear translocator-like [Source:MGI Symbol;Acc:MGI:1096381]	0.473749	4.47264	5.8448	0.0156232	0.0370273	-0.849154	4.47264	17.8728	2.36174e-05	0.000211636
ENSMUSG00000055707	234378	Klhl26	kelch-like 26 [Source:MGI Symbol;Acc:MGI:2443079]	0.601681	3.76289	8.65351	0.00326432	0.0104442	-0.628011	3.76289	8.87608	0.00288931	0.0106594
ENSMUSG00000055720	69459	Ubl7	ubiquitin-like 7 (bone marrow stromal cell-derived) [Source:MGI Symbol;Acc:MGI:1916709]	0.883174	6.10295	23.5471	1.21896e-06	1.50592e-05	-0.529475	6.10295	8.4036	0.00374479	0.0131475
ENSMUSG00000055733	54561	Nap1l3	nucleosome assembly protein 1-like 3 [Source:MGI Symbol;Acc:MGI:1859565]	0.654598	5.60578	7.86146	0.00504997	0.0148844	-1.03529	5.60578	19.1203	1.22735e-05	0.000122479
ENSMUSG00000055760	67242	Gemin6	gem (nuclear organelle) associated protein 6 [Source:MGI Symbol;Acc:MGI:1914492]	0.814189	3.11524	8.1108	0.00440024	0.0133142	-0.803696	3.11524	7.48747	0.00621298	0.0198953
ENSMUSG00000055917	246196	Zfp277	zinc finger protein 277 [Source:MGI Symbol;Acc:MGI:1890393]	0.499665	4.46972	8.34514	0.00386721	0.0120045	-0.622479	4.46972	12.3109	0.000450316	0.00236879
ENSMUSG00000055963	208820	Triqk	triple QxxK/R motif containing [Source:MGI Symbol;Acc:MGI:3650048]	0.841551	3.75408	9.92293	0.00163233	0.00586093	-0.641386	3.75408	5.56887	0.0182826	0.0473141
ENSMUSG00000056089	NA	Gm5468	predicted gene 5468 [Source:MGI Symbol;Acc:MGI:3648948]	1.3607	-0.422197	9.2539	0.00234994	0.00793802	-1.24518	-0.422197	5.02504	0.0249833	0.0605904
ENSMUSG00000056185	225861	Snx32	sorting nexin 32 [Source:MGI Symbol;Acc:MGI:2444704]	0.571711	6.38886	10.472	0.00121199	0.00459357	-0.521404	6.38886	8.62196	0.00332134	0.0119178
ENSMUSG00000056305	28035	Usp39	ubiquitin specific peptidase 39 [Source:MGI Symbol;Acc:MGI:107622]	0.564069	5.05853	6.67096	0.00979964	0.0254	-0.771714	5.05853	12.1366	0.000494423	0.00255907
ENSMUSG00000056367	242894	Actr3b	ARP3 actin-related protein 3B [Source:MGI Symbol;Acc:MGI:2661120]	0.564359	6.733	8.7913	0.0030267	0.00979226	-0.434843	6.733	5.1954	0.0226468	0.0559441
ENSMUSG00000056486	108699	Chn1	chimerin 1 [Source:MGI Symbol;Acc:MGI:1915674]	0.746284	10.2862	9.09138	0.00256817	0.00855632	-0.668998	10.2862	7.3181	0.00682634	0.0213761
ENSMUSG00000056501	12608	Cebpb	CCAAT/enhancer binding protein (C/EBP), beta [Source:MGI Symbol;Acc:MGI:88373]	1.05383	0.345731	6.19009	0.0128468	0.0316654	-1.06109	0.345731	4.77958	0.0287991	0.0674069
ENSMUSG00000056820	53424	Tsnax	translin-associated factor X [Source:MGI Symbol;Acc:MGI:1855672]	0.627365	6.78426	11.8476	0.000577346	0.00249035	-0.815282	6.78426	19.6918	9.0992e-06	9.61203e-05
ENSMUSG00000057388	67681	Mrpl18	mitochondrial ribosomal protein L18 [Source:MGI Symbol;Acc:MGI:1914931]	0.84852	6.2726	17.3212	3.15648e-05	0.000225896	-0.400336	6.2726	3.85662	0.0495501	0.103758
ENSMUSG00000057455	19762	Rit2	Ras-like without CAAX 2 [Source:MGI Symbol;Acc:MGI:108054]	0.884552	6.95046	16.12	5.94517e-05	0.000384465	-0.625197	6.95046	8.06022	0.00452478	0.0153899
ENSMUSG00000057497	66488	Fam136a	family with sequence similarity 136, member A [Source:MGI Symbol;Acc:MGI:1913738]	1.04208	4.9145	23.6238	1.17131e-06	1.45546e-05	-0.710373	4.9145	10.7463	0.0010449	0.00472204
ENSMUSG00000057506	73689	Bloc1s2	biogenesis of lysosomal organelles complex-1, subunit 2 [Source:MGI Symbol;Acc:MGI:1920939]	0.914551	3.34736	11.714	0.000620318	0.00263372	-0.545418	3.34736	3.99624	0.045602	0.0970655
ENSMUSG00000057561	13664	Eif1a	eukaryotic translation initiation factor 1A [Source:MGI Symbol;Acc:MGI:95298]	0.686038	5.97485	10.9994	0.000911399	0.00361717	-0.868686	5.97485	17.2972	3.19665e-05	0.000271788
ENSMUSG00000057614	14677	Gnai1	guanine nucleotide binding protein (G protein), alpha inhibiting 1 [Source:MGI Symbol;Acc:MGI:95771]	0.647553	7.57445	9.91722	0.0016374	0.0058716	-0.519877	7.57445	6.3856	0.011505	0.0326063
ENSMUSG00000057667	232946	Bloc1s3	biogenesis of lysosomal organelles complex-1, subunit 3 [Source:MGI Symbol;Acc:MGI:2678952]	0.655615	1.70637	4.07944	0.0434082	0.0850966	-0.901656	1.70637	6.8248	0.00899004	0.0267059
ENSMUSG00000057715	320492	A830018L16Rik	RIKEN cDNA A830018L16 gene [Source:MGI Symbol;Acc:MGI:2444149]	0.508408	5.88804	7.0191	0.00806448	0.0217215	-0.799652	5.88804	16.9615	3.81449e-05	0.000314129
ENSMUSG00000058317	218793	Ube2e2	ubiquitin-conjugating enzyme E2E 2 [Source:MGI Symbol;Acc:MGI:2384997]	0.824472	6.44297	16.7601	4.24155e-05	0.000288883	-0.835523	6.44297	17.0019	3.73415e-05	0.000309794
ENSMUSG00000058444	23938	Map2k5	mitogen-activated protein kinase kinase 5 [Source:MGI Symbol;Acc:MGI:1346345]	0.854195	3.78869	23.1664	1.48571e-06	1.78657e-05	-0.429514	3.78869	5.47027	0.0193427	0.0494172
ENSMUSG00000058503	68152	Fam133b	family with sequence similarity 133, member B [Source:MGI Symbol;Acc:MGI:1915402]	0.947535	5.23059	23.7891	1.07492e-06	1.35987e-05	-0.557724	5.23059	8.09659	0.00443486	0.0151578
ENSMUSG00000058799	53605	Nap1l1	nucleosome assembly protein 1-like 1 [Source:MGI Symbol;Acc:MGI:1855693]	0.468508	7.06745	8.03397	0.00459082	0.0137673	-0.59158	7.06745	12.666	0.000372359	0.00203
ENSMUSG00000059005	229279	Hnrnpa3	heterogeneous nuclear ribonucleoprotein A3 [Source:MGI Symbol;Acc:MGI:1917171]	0.443586	4.46568	5.51728	0.0188295	0.0430391	-0.498681	4.46568	6.71682	0.00955076	0.028006
ENSMUSG00000059208	76936	Hnrnpm	heterogeneous nuclear ribonucleoprotein M [Source:MGI Symbol;Acc:MGI:1926465]	0.802725	5.1759	19.3159	1.10779e-05	9.58917e-05	-0.671643	5.1759	13.1451	0.000288278	0.00164822
ENSMUSG00000059482	67157	2610301B20Rik	RIKEN cDNA 2610301B20 gene [Source:MGI Symbol;Acc:MGI:1914407]	0.41562	5.35243	4.70427	0.0300877	0.0629879	-0.917043	5.35243	22.0887	2.60336e-06	3.39063e-05
ENSMUSG00000059552	22059	Trp53	transformation related protein 53 [Source:MGI Symbol;Acc:MGI:98834]	0.419309	4.31614	4.2839	0.0384751	0.0770742	-0.687201	4.31614	11.0271	0.000897874	0.00418152
ENSMUSG00000059554	215814	Ccdc28a	coiled-coil domain containing 28A [Source:MGI Symbol;Acc:MGI:2443508]	1.1206	5.05972	16.9696	3.79836e-05	0.000264278	-0.861405	5.05972	9.92688	0.00162883	0.00671175
ENSMUSG00000059586	68501	Nsmce2	NSE2/MMS21 homolog, SMC5-SMC6 complex SUMO ligase [Source:MGI Symbol;Acc:MGI:1915751]	0.384341	4.42231	4.665	0.0307835	0.064188	-0.533989	4.42231	8.63781	0.00329257	0.0118424
ENSMUSG00000059796	13681	Eif4a1	eukaryotic translation initiation factor 4A1 [Source:MGI Symbol;Acc:MGI:95303]	0.511168	6.2915	5.17874	0.022865	0.0504286	-0.529188	6.2915	5.50549	0.0189569	0.0486316
ENSMUSG00000059878	67255	Zfp422	zinc finger protein 422 [Source:MGI Symbol;Acc:MGI:1914505]	0.415772	4.45458	4.81129	0.0282739	0.0598142	-0.724411	4.45458	13.9542	0.000187316	0.00115311
ENSMUSG00000059895	19245	Ptp4a3	protein tyrosine phosphatase 4a3 [Source:MGI Symbol;Acc:MGI:1277098]	0.776219	4.8053	11.2104	0.000813383	0.00329259	-0.53126	4.8053	5.16293	0.0230739	0.0567886
ENSMUSG00000060240	57754	Cend1	cell cycle exit and neuronal differentiation 1 [Source:MGI Symbol;Acc:MGI:1929898]	1.54761	7.79456	56.9347	4.50519e-14	6.9113e-12	-0.459188	7.79456	5.19336	0.0226733	0.0559824
ENSMUSG00000060288	66101	Ppih	peptidyl prolyl isomerase H [Source:MGI Symbol;Acc:MGI:106499]	0.596294	2.80699	5.09279	0.0240255	0.0524571	-0.839095	2.80699	9.31621	0.00227135	0.00879953
ENSMUSG00000060450	56736	Rnf14	ring finger protein 14 [Source:MGI Symbol;Acc:MGI:1929668]	0.668165	8.64195	10.8814	0.000971334	0.00382655	-0.780246	8.64195	14.7562	0.000122347	0.000815349
ENSMUSG00000060708	117197	Bloc1s4	biogenesis of lysosomal organelles complex-1, subunit 4, cappuccino [Source:MGI Symbol;Acc:MGI:1929230]	0.908721	1.88567	7.96929	0.00475776	0.0142038	-0.715747	1.88567	4.45778	0.0347426	0.0781977
ENSMUSG00000060992	56447	Copz1	coatomer protein complex, subunit zeta 1 [Source:MGI Symbol;Acc:MGI:1929063]	0.489973	7.41208	7.43026	0.00641359	0.0181003	-0.417306	7.41208	5.36941	0.0204929	0.0516169
ENSMUSG00000061086	17896	Myl4	myosin, light polypeptide 4 [Source:MGI Symbol;Acc:MGI:97267]	2.26745	5.98291	72.8322	1.41153e-17	8.16496e-15	-0.543484	5.98291	4.4685	0.0345253	0.0777711
ENSMUSG00000061118	66114	Dnajc30	DnaJ heat shock protein family (Hsp40) member C30 [Source:MGI Symbol;Acc:MGI:1913364]	1.33102	3.51836	27.394	1.65941e-07	2.79204e-06	-0.608178	3.51836	5.46549	0.0193956	0.0495073
ENSMUSG00000061298	78933	Agbl4	ATP/GTP binding protein-like 4 [Source:MGI Symbol;Acc:MGI:1918244]	0.901104	3.74566	13.2851	0.000267526	0.00133167	-0.539451	3.74566	4.60425	0.0318927	0.0731375
ENSMUSG00000061360	68479	Phf5a	PHD finger protein 5A [Source:MGI Symbol;Acc:MGI:2156864]	0.83637	5.57882	13.4866	0.000240275	0.00121587	-0.475445	5.57882	4.33437	0.0373502	0.0826909
ENSMUSG00000061702	320208	Tmem91	transmembrane protein 91 [Source:MGI Symbol;Acc:MGI:2443589]	0.914037	5.42444	19.0998	1.24058e-05	0.000105264	-0.492503	5.42444	5.50104	0.0190052	0.0487405
ENSMUSG00000062040	22689	Zfp27	zinc finger protein 27 [Source:MGI Symbol;Acc:MGI:99174]	0.44493	4.30954	4.32294	0.0376019	0.0756594	-0.713425	4.30954	10.6842	0.00108053	0.00484863
ENSMUSG00000062070	18655	Pgk1	phosphoglycerate kinase 1 [Source:MGI Symbol;Acc:MGI:97555]	1.03291	5.7579	26.4023	2.7721e-07	4.32668e-06	-0.521923	5.7579	6.7168	0.00955087	0.028006
ENSMUSG00000062110	212986	Scfd2	Sec1 family domain containing 2 [Source:MGI Symbol;Acc:MGI:2443446]	0.399302	4.15244	4.72896	0.0296588	0.0622219	-0.379917	4.15244	4.10152	0.0428448	0.0920376
ENSMUSG00000062116	232853	Zfp954	zinc finger protein 954 [Source:MGI Symbol;Acc:MGI:1917764]	0.573088	4.12565	5.19009	0.022716	0.0502228	-0.670585	4.12565	6.89417	0.00864773	0.0258891
ENSMUSG00000062190	71835	Lancl2	LanC (bacterial lantibiotic synthetase component C)-like 2 [Source:MGI Symbol;Acc:MGI:1919085]	0.57251	6.52641	7.92073	0.00488717	0.0145256	-0.994553	6.52641	23.3629	1.34141e-06	1.96869e-05
ENSMUSG00000062203	14852	Gspt1	G1 to S phase transition 1 [Source:MGI Symbol;Acc:MGI:1316728]	0.538909	5.37314	7.32836	0.00678748	0.0189518	-0.529233	5.37314	6.93449	0.00845493	0.0254087
ENSMUSG00000062270	21761	Morf4l1	mortality factor 4 like 1 [Source:MGI Symbol;Acc:MGI:1096551]	0.607924	5.65461	10.3335	0.00130634	0.0048795	-0.71977	5.65461	14.1683	0.00016716	0.0010522
ENSMUSG00000062397	68036	Zfp706	zinc finger protein 706 [Source:MGI Symbol;Acc:MGI:1915286]	0.557044	7.13156	7.05466	0.00790592	0.0213803	-0.612889	7.13156	8.4829	0.00358499	0.0126901
ENSMUSG00000062444	11775	Ap3b2	adaptor-related protein complex 3, beta 2 subunit [Source:MGI Symbol;Acc:MGI:1100869]	0.572426	7.118	6.55588	0.0104538	0.0267565	-0.482521	7.118	4.64757	0.0310976	0.0716569
ENSMUSG00000062931	237411	Zfp938	zinc finger protein 938 [Source:MGI Symbol;Acc:MGI:3621440]	0.667852	5.81326	11.4403	0.000718673	0.00297599	-0.662117	5.81326	11.0642	0.000880129	0.0041206
ENSMUSG00000062995	15893	Ica1	islet cell autoantigen 1 [Source:MGI Symbol;Acc:MGI:96391]	0.498546	5.49459	5.4759	0.0192805	0.0439085	-0.767914	5.49459	12.7016	0.000365352	0.00200287
ENSMUSG00000063049	69260	Ing2	inhibitor of growth family, member 2 [Source:MGI Symbol;Acc:MGI:1916510]	0.585889	4.56174	5.6646	0.0173106	0.0401751	-0.54568	4.56174	4.81252	0.0282537	0.0663805
ENSMUSG00000063160	18223	Numbl	numb-like [Source:MGI Symbol;Acc:MGI:894702]	0.918047	3.64454	16.8982	3.94386e-05	0.000272369	-0.540483	3.64454	5.56232	0.018351	0.0474673
ENSMUSG00000063179	214580	Pstk	phosphoseryl-tRNA kinase [Source:MGI Symbol;Acc:MGI:2685945]	0.94783	3.48535	14.0995	0.000173392	0.000931366	-0.837878	3.48535	10.3663	0.00128338	0.0055644
ENSMUSG00000063236	117171	1110038F14Rik	RIKEN cDNA 1110038F14 gene [Source:MGI Symbol;Acc:MGI:2152337]	1.14343	3.60423	23.9104	1.00925e-06	1.29238e-05	-0.578276	3.60423	5.82706	0.0157815	0.0420414
ENSMUSG00000063253	56367	Scoc	short coiled-coil protein [Source:MGI Symbol;Acc:MGI:1927654]	0.724859	6.33465	14.2733	0.000158094	0.000863852	-0.873035	6.33465	20.3305	6.51527e-06	7.2141e-05
ENSMUSG00000063281	22694	Zfp35	zinc finger protein 35 [Source:MGI Symbol;Acc:MGI:99179]	0.585458	4.86327	8.34113	0.00387574	0.0120288	-0.639615	4.86327	9.67842	0.00186445	0.00748234
ENSMUSG00000063568	231986	Jazf1	JAZF zinc finger 1 [Source:MGI Symbol;Acc:MGI:2141450]	0.632198	4.8297	6.26423	0.01232	0.0306674	-1.00162	4.8297	15.2257	9.53966e-05	0.000662915
ENSMUSG00000063646	76071	Jakmip1	janus kinase and microtubule interacting protein 1 [Source:MGI Symbol;Acc:MGI:1923321]	0.930657	5.04479	14.8912	0.00011389	0.000657211	-0.63187	5.04479	6.78441	0.00919572	0.0272108
ENSMUSG00000063694	13063	Cycs	cytochrome c, somatic [Source:MGI Symbol;Acc:MGI:88578]	1.0526	4.47373	16.8799	3.98215e-05	0.000274335	-0.539828	4.47373	4.37612	0.0364458	0.0810954
ENSMUSG00000063889	12916	Crem	cAMP responsive element modulator [Source:MGI Symbol;Acc:MGI:88495]	1.04593	4.9467	21.542	3.46163e-06	3.64984e-05	-0.577384	4.9467	6.48417	0.0108839	0.031146
ENSMUSG00000063895	71844	Nupl1	nucleoporin like 1 [Source:MGI Symbol;Acc:MGI:1919094]	0.561018	4.1405	4.19945	0.040437	0.0803234	-1.06198	4.1405	14.397	0.00014804	0.000951563
ENSMUSG00000063902	NA	Gm7964	predicted gene 7964 [Source:MGI Symbol;Acc:MGI:3646150]	0.597787	1.11842	4.29731	0.0381727	0.0765966	-0.947029	1.11842	8.75279	0.00309129	0.0112658
ENSMUSG00000064181	216363	Rab3ip	RAB3A interacting protein [Source:MGI Symbol;Acc:MGI:105933]	0.794474	5.2169	13.9459	0.00018815	0.000996278	-0.85863	5.2169	15.8388	6.89747e-05	0.000509266
ENSMUSG00000066037	74326	Hnrnpr	heterogeneous nuclear ribonucleoprotein R [Source:MGI Symbol;Acc:MGI:1891692]	0.509069	5.34796	8.04432	0.00456467	0.0137054	-0.509002	5.34796	7.85733	0.0050615	0.0167988
ENSMUSG00000066877	17974	Nck2	non-catalytic region of tyrosine kinase adaptor protein 2 [Source:MGI Symbol;Acc:MGI:1306821]	0.455882	4.15294	5.0168	0.0251025	0.0543769	-0.794885	4.15294	14.4695	0.000142447	0.000925465
ENSMUSG00000066979	12237	Bub3	BUB3 mitotic checkpoint protein [Source:MGI Symbol;Acc:MGI:1343463]	0.432717	6.1473	6.94319	0.00841389	0.0224321	-0.472664	6.1473	8.16092	0.00428026	0.0147164
ENSMUSG00000067367	17089	Lyar	Ly1 antibody reactive clone [Source:MGI Symbol;Acc:MGI:107470]	1.06658	2.74733	15.2447	9.44428e-05	0.000562399	-0.612921	2.74733	4.6785	0.0305425	0.0706495
ENSMUSG00000067873	72459	Htatsf1	HIV TAT specific factor 1 [Source:MGI Symbol;Acc:MGI:1919709]	0.500565	6.69328	6.84325	0.00889766	0.0234978	-0.398879	6.69328	4.31941	0.0376801	0.0831908
ENSMUSG00000067879	76982	3110035E14Rik	RIKEN cDNA 3110035E14 gene [Source:MGI Symbol;Acc:MGI:1924232]	0.675912	7.97712	7.46137	0.00630369	0.0178441	-0.965631	7.97712	15.0453	0.000104961	0.00071632
ENSMUSG00000067995	68705	Gtf2f2	general transcription factor IIF, polypeptide 2 [Source:MGI Symbol;Acc:MGI:1915955]	0.764457	4.11055	16.086	6.05284e-05	0.000390374	-0.405271	4.11055	4.32966	0.0374536	0.0828653
ENSMUSG00000068205	72899	Macrod2	MACRO domain containing 2 [Source:MGI Symbol;Acc:MGI:1920149]	0.447786	5.39897	5.87849	0.015327	0.0364747	-0.58926	5.39897	9.94413	0.00161363	0.00665732
ENSMUSG00000068749	26442	Psma5	proteasome (prosome, macropain) subunit, alpha type 5 [Source:MGI Symbol;Acc:MGI:1347009]	0.575763	5.8761	8.37868	0.00379648	0.0118068	-0.574964	5.8761	8.24051	0.00409655	0.0141707
ENSMUSG00000069678	69837	Pcgf1	polycomb group ring finger 1 [Source:MGI Symbol;Acc:MGI:1917087]	0.665594	3.44867	6.28045	0.0122077	0.0304377	-0.88082	3.44867	10.4103	0.00125316	0.00545632
ENSMUSG00000070462	80889	Mesdc1	mesoderm development candidate 1 [Source:MGI Symbol;Acc:MGI:1891420]	0.605152	4.07537	4.92427	0.0264819	0.0567784	-0.574041	4.07537	4.31599	0.0377558	0.0833469
ENSMUSG00000070544	21969	Top1	topoisomerase (DNA) I [Source:MGI Symbol;Acc:MGI:98788]	0.405697	6.64651	4.47342	0.0344261	0.0703322	-0.782887	6.64651	16.3695	5.21161e-05	0.000405495
ENSMUSG00000070705	434156	Eid2b	EP300 interacting inhibitor of differentiation 2B [Source:MGI Symbol;Acc:MGI:1924095]	0.76174	3.57938	11.4359	0.000720391	0.00298163	-0.604894	3.57938	6.82367	0.00899576	0.0267121
ENSMUSG00000070934	68441	Rraga	Ras-related GTP binding A [Source:MGI Symbol;Acc:MGI:1915691]	0.503117	7.05118	5.37496	0.0204278	0.0461207	-0.612394	7.05118	7.90635	0.00492614	0.0164319
ENSMUSG00000070953	227746	Rabepk	Rab9 effector protein with kelch motifs [Source:MGI Symbol;Acc:MGI:2139530]	0.352449	5.62867	3.88098	0.048836	0.0935722	-0.356815	5.62867	3.92192	0.0476605	0.100668
ENSMUSG00000071054	224903	Safb	scaffold attachment factor B [Source:MGI Symbol;Acc:MGI:2146974]	0.550934	4.28135	4.36826	0.0366143	0.0740446	-0.663793	4.28135	6.18344	0.0128951	0.0357723
ENSMUSG00000071078	75692	Nr2c2ap	nuclear receptor 2C2-associated protein [Source:MGI Symbol;Acc:MGI:1922942]	1.07475	2.08053	13.3411	0.000259657	0.0012979	-0.65229	2.08053	4.43019	0.0353085	0.0791528
ENSMUSG00000071341	13656	Egr4	early growth response 4 [Source:MGI Symbol;Acc:MGI:99252]	0.931532	2.38638	8.33903	0.00388023	0.0120359	-0.803981	2.38638	5.71355	0.0168344	0.0442768
ENSMUSG00000071359	237336	Tbpl1	TATA box binding protein-like 1 [Source:MGI Symbol;Acc:MGI:1339946]	0.653166	5.52614	10.3462	0.00129742	0.00485159	-0.592511	5.52614	8.38351	0.0037864	0.0132631
ENSMUSG00000071379	53602	Hpcal1	hippocalcin-like 1 [Source:MGI Symbol;Acc:MGI:1855689]	1.08414	6.06204	12.6875	0.000368107	0.00173071	-0.838986	6.06204	7.60814	0.00581054	0.0188533
ENSMUSG00000071533	76302	Pcnp	PEST proteolytic signal containing nuclear protein [Source:MGI Symbol;Acc:MGI:1923552]	0.769303	7.08162	5.69671	0.0169967	0.0395835	-0.69796	7.08162	4.68379	0.0304486	0.0704809
ENSMUSG00000071632	72307	2510002D24Rik	RIKEN cDNA 2510002D24 gene [Source:MGI Symbol;Acc:MGI:1919557]	0.444349	3.74962	5.16054	0.0231058	0.0508594	-0.467932	3.74962	5.4405	0.019675	0.0500527
ENSMUSG00000071658	14704	Gng3	guanine nucleotide binding protein (G protein), gamma 3 [Source:MGI Symbol;Acc:MGI:102704]	0.997581	9.54817	12.6731	0.000370945	0.00174108	-0.881892	9.54817	9.93765	0.00161932	0.00667752
ENSMUSG00000071708	20603	Sms	spermine synthase [Source:MGI Symbol;Acc:MGI:109490]	0.408194	6.12445	4.46109	0.0346754	0.0707124	-0.943362	6.12445	23.1842	1.472e-06	2.13941e-05
ENSMUSG00000071723	14853	Gspt2	G1 to S phase transition 2 [Source:MGI Symbol;Acc:MGI:1316727]	0.54836	5.03329	4.71214	0.0299504	0.0627394	-0.921326	5.03329	12.9405	0.000321556	0.00180345
ENSMUSG00000072964	70237	Bhlhb9	basic helix-loop-helix domain containing, class B9 [Source:MGI Symbol;Acc:MGI:1917487]	0.419389	5.5306	4.52747	0.0333549	0.0685918	-0.7106	5.5306	12.6745	0.000370684	0.00202219
ENSMUSG00000072969	494468	Armcx5	armadillo repeat containing, X-linked 5 [Source:MGI Symbol;Acc:MGI:2148026]	0.679229	5.58144	4.83843	0.0278323	0.0590696	-0.976213	5.58144	9.81022	0.00173545	0.00705408
ENSMUSG00000073198	NA	Bnip3l-ps	BCL2/adenovirus E1B interacting protein 3-like, pseudogene [Source:MGI Symbol;Acc:MGI:3642435]	0.875352	-0.363117	6.07158	0.0137374	0.0334366	-0.914847	-0.363117	4.34469	0.0371244	0.0823034
ENSMUSG00000073639	19330	Rab18	RAB18, member RAS oncogene family [Source:MGI Symbol;Acc:MGI:102790]	0.486986	7.30689	6.97051	0.00828637	0.0221803	-0.578845	7.30689	9.77148	0.00177239	0.00716777
ENSMUSG00000074039	NA	4930520O04Rik	RIKEN cDNA 4930520O04 gene [Source:MGI Symbol;Acc:MGI:1922366]	1.00459	0.0812421	7.16768	0.00742289	0.0202998	-1.01867	0.0812421	5.49537	0.0190669	0.0488539
ENSMUSG00000074064	56690	Mlycd	malonyl-CoA decarboxylase [Source:MGI Symbol;Acc:MGI:1928485]	0.947859	3.93753	22.7746	1.82154e-06	2.13234e-05	-0.481798	3.93753	5.58063	0.0181602	0.0470629
ENSMUSG00000074461	NA	Gm10699	predicted gene 10699 [Source:MGI Symbol;Acc:MGI:3642530]	0.781625	4.58065	12.4484	0.000418342	0.00192055	-0.85761	4.58065	14.4572	0.000143384	0.000929333
ENSMUSG00000074671	241732	Tspyl3	TSPY-like 3 [Source:MGI Symbol;Acc:MGI:2139328]	0.544103	4.42719	5.4202	0.019905	0.0451347	-0.883847	4.42719	13.7379	0.000210168	0.00126368
ENSMUSG00000074736	433485	Syndig1	synapse differentiation inducing 1 [Source:MGI Symbol;Acc:MGI:3702158]	0.656962	5.78038	8.86647	0.00290456	0.00947426	-0.475893	5.78038	4.61991	0.0316029	0.0726118
ENSMUSG00000074797	16434	Itpa	inosine triphosphatase (nucleoside triphosphate pyrophosphatase) [Source:MGI Symbol;Acc:MGI:96622]	0.949464	5.50035	20.7583	5.2104e-06	5.14749e-05	-0.680095	5.50035	10.5105	0.00118697	0.0052426
ENSMUSG00000074922	68034	Fam122a	family with sequence similarity 122, member A [Source:MGI Symbol;Acc:MGI:1915284]	0.783063	3.30814	7.01868	0.00806638	0.0217232	-0.916643	3.30814	9.1301	0.00251438	0.0095319
ENSMUSG00000075000	641340	Nrbf2	nuclear receptor binding factor 2 [Source:MGI Symbol;Acc:MGI:1354950]	0.980404	1.53099	5.25302	0.0219087	0.0488461	-1.27461	1.53099	7.9101	0.00491595	0.0164077
ENSMUSG00000075296	621603	Aldh3b2	aldehyde dehydrogenase 3 family, member B2 [Source:MGI Symbol;Acc:MGI:2147613]	1.56555	3.85311	34.5141	4.23178e-09	1.22393e-07	-0.5766	3.85311	4.60265	0.0319225	0.0731658
ENSMUSG00000076432	22630	Ywhaq	tyrosine 3-monooxygenase/tryptophan 5-monooxygenase activation protein, theta polypeptide [Source:MGI Symbol;Acc:MGI:891963]	0.652196	7.22477	8.57257	0.00341266	0.01083	-0.476574	7.22477	4.57315	0.0324769	0.0741795
ENSMUSG00000076498	NA	Trbc2	T cell receptor beta, constant 2 [Source:MGI Symbol;Acc:MGI:4835227]	1.43519	4.49884	30.3813	3.54937e-08	7.51776e-07	-0.725173	4.49884	7.7057	0.00550468	0.0180318
ENSMUSG00000076612	NA	Ighg2c	immunoglobulin heavy constant gamma 2C [Source:MGI Symbol;Acc:MGI:2686979]	0.755398	2.23278	7.21172	0.00724289	0.0199114	-0.807357	2.23278	7.4167	0.00646211	0.0204841
ENSMUSG00000078317	14070	F8a	factor 8-associated gene A [Source:MGI Symbol;Acc:MGI:95474]	1.03401	3.89076	11.8421	0.000579067	0.00249521	-0.771659	3.89076	6.43336	0.0111996	0.0318971
ENSMUSG00000078566	12176	Bnip3	BCL2/adenovirus E1B interacting protein 3 [Source:MGI Symbol;Acc:MGI:109326]	1.19345	6.09159	38.9161	4.42418e-10	1.84616e-08	-0.79693	6.09159	17.2448	3.28588e-05	0.000278001
ENSMUSG00000078578	66105	Ube2d3	ubiquitin-conjugating enzyme E2D 3 [Source:MGI Symbol;Acc:MGI:1913355]	0.575005	6.44304	8.48117	0.00358842	0.0112663	-0.780333	6.44304	15.3667	8.85368e-05	0.00062456
ENSMUSG00000078941	108143	Ak6	adenylate kinase 6 [Source:MGI Symbol;Acc:MGI:5510732]	0.706951	4.15082	5.36574	0.0205361	0.0463216	-0.683048	4.15082	4.9011	0.0268395	0.0639354
ENSMUSG00000078974	20335	Sec61g	SEC61, gamma subunit [Source:MGI Symbol;Acc:MGI:1202066]	0.749114	2.97375	8.58121	0.00339649	0.0107909	-0.997427	2.97375	13.8946	0.000193349	0.00118072
ENSMUSG00000079045	NA	Prox1os	prospero homeobox 1, opposite strand [Source:MGI Symbol;Acc:MGI:4937200]	0.885544	1.66851	8.99841	0.00270215	0.00892997	-0.754907	1.66851	5.7336	0.0166433	0.0438774
ENSMUSG00000079083	77532	Jrkl	Jrk-like [Source:MGI Symbol;Acc:MGI:1924782]	0.536593	2.65657	4.47508	0.0343926	0.0702809	-0.794871	2.65657	9.01435	0.00267868	0.0100189
ENSMUSG00000079108	100101806	Srp54b	signal recognition particle 54B [Source:MGI Symbol;Acc:MGI:3714357]	0.819767	2.98212	8.41963	0.00371192	0.0115911	-0.580406	2.98212	4.01587	0.0450739	0.0961
ENSMUSG00000079316	56382	Rab9	RAB9, member RAS oncogene family [Source:MGI Symbol;Acc:MGI:1890695]	0.507645	5.49673	6.18742	0.0128661	0.0317023	-0.430999	5.49673	4.39733	0.0359953	0.0802527
ENSMUSG00000079317	66226	Trappc2	trafficking protein particle complex 2 [Source:MGI Symbol;Acc:MGI:1913476]	0.69424	5.36084	10.0985	0.00148388	0.00542193	-0.731285	5.36084	10.9683	0.000926858	0.00428085
ENSMUSG00000079339	667373	Ifit1bl1	interferon induced protein with tetratricpeptide repeats 1B like 1 [Source:MGI Symbol;Acc:MGI:3650685]	0.767426	1.95047	7.87515	0.00501187	0.014807	-0.74499	1.95047	6.55524	0.0104575	0.0301115
ENSMUSG00000079477	19349	Rab7	RAB7, member RAS oncogene family [Source:MGI Symbol;Acc:MGI:105068]	0.781581	7.24066	18.1857	2.00381e-05	0.000154966	-0.497956	7.24066	7.38204	0.00658783	0.0207962
ENSMUSG00000079523	19240	Tmsb10	thymosin, beta 10 [Source:MGI Symbol;Acc:MGI:109146]	1.57616	5.37651	39.426	3.40725e-10	1.48459e-08	-0.629452	5.37651	6.3883	0.0114875	0.0325731
ENSMUSG00000079562	59003	Maea	macrophage erythroblast attacher [Source:MGI Symbol;Acc:MGI:1891748]	0.735633	5.92463	16.2568	5.53115e-05	0.000362442	-0.464723	5.92463	6.4262	0.0112449	0.0319989
ENSMUSG00000079614	72124	Seh1l	SEH1-like (S. cerevisiae [Source:MGI Symbol;Acc:MGI:1919374]	0.57371	5.92719	7.39783	0.00653026	0.0183644	-0.780487	5.92719	13.4305	0.000247564	0.00144952
ENSMUSG00000079657	328778	Rab26	RAB26, member RAS oncogene family [Source:MGI Symbol;Acc:MGI:2443284]	0.730814	5.18246	9.85615	0.00169265	0.00603874	-0.607763	5.18246	6.71295	0.0095715	0.0280506
ENSMUSG00000079737	67118	3110001I22Rik	RIKEN cDNA 3110001I22 gene [Source:MGI Symbol;Acc:MGI:1913848]	0.606543	0.809371	4.00689	0.0453147	0.0882258	-0.718087	0.809371	4.63087	0.0314017	0.0722187
ENSMUSG00000081113	NA	Gm7308	predicted pseudogene 7308 [Source:MGI Symbol;Acc:MGI:3644558]	1.2563	0.671057	9.42374	0.00214194	0.0073554	-1.12505	0.671057	6.07709	0.0136946	0.0375371
ENSMUSG00000082229	17954	Nap1l2	nucleosome assembly protein 1-like 2 [Source:MGI Symbol;Acc:MGI:106654]	0.637727	6.85488	6.21837	0.0126432	0.0312659	-1.03248	6.85488	16.0061	6.3138e-05	0.000473901
ENSMUSG00000083012	67238	Fam220a	family with sequence similarity 220, member A [Source:MGI Symbol;Acc:MGI:1914488]	0.929966	4.48352	18.3048	1.88234e-05	0.000147415	-0.667924	4.48352	9.15177	0.00248477	0.00944742
ENSMUSG00000083307	NA	AA414768	expressed sequence AA414768 [Source:MGI Symbol;Acc:MGI:3035137]	0.687872	2.27927	5.53046	0.0186882	0.0428065	-0.599924	2.27927	3.89154	0.0485298	0.102144
ENSMUSG00000085007	NA	Gm11549	predicted gene 11549 [Source:MGI Symbol;Acc:MGI:3650339]	0.866118	6.04094	11.2354	0.000802508	0.00325328	-0.546423	6.04094	4.47609	0.0343723	0.0775589
ENSMUSG00000085067	NA	Gm15631	predicted gene 15631 [Source:MGI Symbol;Acc:MGI:3783075]	0.818448	1.96383	5.46404	0.0194117	0.0441534	-0.839251	1.96383	5.30922	0.0212128	0.0530954
ENSMUSG00000085148	NA	Mir22hg	Mir22 host gene (non-protein coding) [Source:MGI Symbol;Acc:MGI:1914348]	0.785255	5.48143	11.5364	0.000682478	0.00285287	-0.978556	5.48143	17.4975	2.87683e-05	0.000249271
ENSMUSG00000085151	NA	1110018N20Rik	RIKEN cDNA 1110018N20 gene [Source:MGI Symbol;Acc:MGI:1915753]	0.736679	1.83198	5.70716	0.0168958	0.0394087	-0.763354	1.83198	5.4587	0.0194711	0.0496394
ENSMUSG00000085238	NA	4930479D17Rik	RIKEN cDNA 4930479D17 gene [Source:MGI Symbol;Acc:MGI:1922175]	0.832891	0.712223	4.11454	0.0425162	0.0837001	-1.09198	0.712223	5.9788	0.0144789	0.0392507
ENSMUSG00000085289	NA	Gm15337	predicted gene 15337 [Source:MGI Symbol;Acc:MGI:3705103]	0.686883	0.518139	5.0047	0.0252785	0.0546503	-0.906803	0.518139	6.63672	0.00998979	0.0290673
ENSMUSG00000085642	NA	3110053B16Rik	RIKEN cDNA 3110053B16 gene [Source:MGI Symbol;Acc:MGI:1920435]	0.539426	1.87481	3.88257	0.0487899	0.0934944	-0.603057	1.87481	4.3474	0.0370654	0.0822233
ENSMUSG00000085971	NA	Gm15411	predicted gene 15411 [Source:MGI Symbol;Acc:MGI:3705213]	1.96344	0.539453	41.5965	1.12193e-10	5.63484e-09	-0.828926	0.539453	4.66764	0.0307362	0.071058
ENSMUSG00000087022	NA	9130024F11Rik	RIKEN cDNA 9130024F11 gene [Source:MGI Symbol;Acc:MGI:1926150]	0.639847	4.65357	7.02369	0.00804383	0.0216763	-0.896601	4.65357	13.3263	0.000261709	0.00152014
ENSMUSG00000087057	NA	Gm11730	predicted gene 11730 [Source:MGI Symbol;Acc:MGI:3650941]	2.72611	1.47236	47.6011	5.22402e-12	4.07595e-10	-1.14568	1.47236	6.74866	0.00938179	0.0276056
ENSMUSG00000087674	NA	4930447M23Rik	RIKEN cDNA 4930447M23 gene [Source:MGI Symbol;Acc:MGI:1918902]	0.787433	2.62755	5.9651	0.0145917	0.0350733	-0.655115	2.62755	3.91999	0.0477152	0.100771
ENSMUSG00000089862	100036521	Umad1	UMAP1-MVP12 associated (UMA) domain containing 1 [Source:MGI Symbol;Acc:MGI:3840148]	0.648083	5.39572	9.0905	0.00256941	0.00855875	-0.979641	5.39572	20.1297	7.23642e-06	7.89791e-05
ENSMUSG00000089889	NA	0610040B10Rik	RIKEN cDNA 0610040B10 gene [Source:MGI Symbol;Acc:MGI:1914922]	0.837355	2.09249	6.02927	0.0140706	0.0340744	-0.891913	2.09249	6.2595	0.0123529	0.0344964
ENSMUSG00000089922	NA	Gm43517	predicted gene 43517 [Source:MGI Symbol;Acc:MGI:5663654]	0.776799	3.53818	6.87442	0.0087438	0.0231644	-0.748063	3.53818	6.15202	0.0131262	0.0362456
ENSMUSG00000089957	NA	A830011K09Rik	RIKEN cDNA A830011K09 gene [Source:MGI Symbol;Acc:MGI:2442570]	0.678071	2.38403	4.88419	0.0271037	0.0578501	-0.789075	2.38403	6.15221	0.0131248	0.0362456
ENSMUSG00000090083	58230	Rnf8	ring finger protein 8 [Source:MGI Symbol;Acc:MGI:1929069]	0.531338	3.67089	4.46125	0.0346722	0.0707124	-0.683802	3.67089	7.08613	0.00776827	0.023745
ENSMUSG00000090223	18546	Pcp4	Purkinje cell protein 4 [Source:MGI Symbol;Acc:MGI:97509]	1.52653	8.47674	21.3352	3.85584e-06	3.99763e-05	-0.809293	8.47674	6.1779	0.0129356	0.0358319
ENSMUSG00000091337	58521	Eid1	EP300 interacting inhibitor of differentiation 1 [Source:MGI Symbol;Acc:MGI:1889651]	1.10511	7.8913	11.7616	0.00060464	0.00258673	-0.889383	7.8913	7.66185	0.00564006	0.0183998
ENSMUSG00000091512	56692	Lamtor3	late endosomal/lysosomal adaptor, MAPK and MTOR activator 3 [Source:MGI Symbol;Acc:MGI:1929467]	0.715179	5.12523	10.231	0.00138102	0.00510953	-0.716343	5.12523	10.0583	0.00151665	0.00632409
ENSMUSG00000091896	56550	Ube2d2a	ubiquitin-conjugating enzyme E2D 2A [Source:MGI Symbol;Acc:MGI:1930715]	0.520344	5.54853	4.49999	0.0338951	0.0694843	-0.633343	5.54853	6.56855	0.0103797	0.0299174
ENSMUSG00000091898	21924	Tnnc1	troponin C, cardiac/slow skeletal [Source:MGI Symbol;Acc:MGI:98779]	2.58698	5.92185	74.7146	5.43937e-18	3.7891e-15	-0.745016	5.92185	6.73142	0.00947294	0.0278396
ENSMUSG00000091931	100233175	Gon7	GON7, KEOPS complex subunit homolog [Source:MGI Symbol;Acc:MGI:4845848]	0.821361	2.82609	7.47658	0.00625068	0.017715	-0.773492	2.82609	6.2315	0.0125498	0.0349601
ENSMUSG00000092417	81845	Gpank1	G patch domain and ankyrin repeats 1 [Source:MGI Symbol;Acc:MGI:2148975]	0.979368	2.98616	14.69	0.000126719	0.00071863	-0.627468	2.98616	5.62793	0.0176765	0.0460899
ENSMUSG00000092607	69269	Scnm1	sodium channel modifier 1 [Source:MGI Symbol;Acc:MGI:1341284]	0.422224	5.41331	4.34114	0.0372021	0.0749808	-0.527163	5.41331	6.64673	0.00993382	0.0289432
ENSMUSG00000094002	NA	Gm9866	predicted gene 9866 [Source:MGI Symbol;Acc:MGI:3643118]	0.79739	4.65737	6.90785	0.00858183	0.0228038	-0.815734	4.65737	7.11022	0.00766459	0.0234795
ENSMUSG00000096472	12581	Cdkn2d	cyclin-dependent kinase inhibitor 2D (p19, inhibits CDK4) [Source:MGI Symbol;Acc:MGI:105387]	1.18406	6.29928	36.1669	1.8112e-09	5.95742e-08	-0.71174	6.29928	13.0859	0.000297521	0.00168897
ENSMUSG00000097333	170763	Zfp87	zinc finger protein 87 [Source:MGI Symbol;Acc:MGI:107768]	0.399466	4.43345	4.28475	0.0384559	0.0770449	-0.635294	4.43345	10.4011	0.0012594	0.00547742
ENSMUSG00000097343	NA	9030407P20Rik	RIKEN cDNA 9030407P20 gene [Source:MGI Symbol;Acc:MGI:1918818]	0.563158	2.52568	4.60069	0.0319591	0.066233	-0.739753	2.52568	7.25505	0.00707018	0.021996
ENSMUSG00000097350	NA	4732491K20Rik	RIKEN cDNA 4732491K20 gene [Source:MGI Symbol;Acc:MGI:3026975]	0.516781	2.25187	4.07242	0.0435888	0.0854209	-0.52701	2.25187	3.89458	0.0484421	0.102049
ENSMUSG00000097466	NA	D430036J16Rik	RIKEN cDNA D430036J16 gene [Source:MGI Symbol;Acc:MGI:2441977]	0.611879	2.40257	4.06546	0.0437687	0.0856833	-0.703889	2.40257	5.00201	0.0253179	0.0611617
ENSMUSG00000097604	NA	Gm17322	predicted gene, 17322 [Source:MGI Symbol;Acc:MGI:4936956]	0.748641	4.00225	7.0476	0.00793714	0.0214578	-1.01022	4.00225	12.3074	0.00045116	0.00237248
ENSMUSG00000097785	NA	B230217O12Rik	RIKEN cDNA B230217O12 gene [Source:MGI Symbol;Acc:MGI:2444948]	0.803424	2.61438	9.48786	0.00206836	0.00714955	-0.725536	2.61438	7.0822	0.00778532	0.0237799
ENSMUSG00000097915	NA	A330009N23Rik	RIKEN cDNA A330009N23 gene [Source:MGI Symbol;Acc:MGI:2443491]	1.23536	3.63737	17.057	3.62745e-05	0.000254285	-0.647563	3.63737	4.56395	0.0326518	0.0744924
ENSMUSG00000098134	66381	Rnf113a2	ring finger protein 113A2 [Source:MGI Symbol;Acc:MGI:1913631]	0.930717	3.16126	9.48177	0.00207523	0.00716887	-0.623247	3.16126	4.08415	0.0432873	0.09281
ENSMUSG00000098912	NA	1500004A13Rik	RIKEN cDNA 1500004A13 gene [Source:MGI Symbol;Acc:MGI:2442808]	0.363215	5.99455	4.11021	0.0426252	0.083836	-0.711847	5.99455	15.4547	8.4506e-05	0.000600418
