# Supplementary material for: The Differences in Local Translatome across Distinct Neuron Types Is Mediated by Both Baseline Cellular Differences and Post-transcriptional Mechanisms
Source: eNeuro. 2019 Feb 4;5(6):ENEURO.0320-18.2018. doi: 10.1523/ENEURO.0320-18.2018 (PMC6361723; doi:10.1523/ENEURO.0320-18.2018)
Supplement: Figure 4-1 — GO analysis results of RBP4 local translation candidates with a significance cutoff, p = 5E-8. Full table of GO analysis results of RBP4 local translation candidates with a significance cutoff, p = 5E-8. Column headers are generated by BINGO and include GO ID (Gene Ontologies Category number), Description (provided by GO), p value of hypergeometic, test, corr p-val (p value after Benjamin-Hochberg correction), cluster freq (number of GO genes in the local translation list), total freq (number of genes in the GO term list compared with all annotated genes), and genes (a list of the genes in the intersection). Download Figure 4-1, XLS file. [file sup_enu-eN-NWR-0320-18-s09.xls]

## Sheet: Sheet1
GO-ID	Description	p-value	corr p-val	cluster freq	total freq	genes
5488	binding	8.4574e-32	1.7845e-28	167/232 71.9%	10293/30001 34.3%	GLTP RPL4 IPO13 WIPF1 FRMPD1 PLEKHB1 CIB1 CDH5 RIMS1 STK11 ZMIZ2 KIF5B PALM KDR DENND5A TNS3 EPHB4 TNS1 UNC13C FBXO2 TALDO1 RPSA VRK3 DAAM2 PRKD1 RPL29 EZR NBL1 CSNK1G2 EMID1 ABCG2 BRSK1 TBC1D9B SHC3 EPAS1 CABP7 MAZ AGAP2 LPAR1 AGAP1 ZC3HAV1 TTBK1 FBXO41 CYB5R3 GRK2 EPB41L1 S100A16 MICAL1 EPB41L2 NACC2 MYO6 CDH22 MBP WDTC1 FDPS YES1 HOMER2 RASL10B RDX IDH2 EEF2 ADAP1 SYT7 SCRT1 POU6F1 GFAP FBXO31…
44464	cell part	3.5597e-31	2.5325e-28	195/232 84.0%	14253/30001 47.5%	GLTP RPL4 IPO13 WIPF1 FRMPD1 PLEKHB1 EPS8 ZMIZ2 KDR TNS3 EPHB4 TNS1 TMEM8B UNC13C FBXO2 TALDO1 KCNQ4 PRR18 PRKD1 RPL29 EZR NBL1 TBC1D9B EPAS1 AGAP2 LPAR1 AGAP1 ZC3HAV1 TTBK1 CYB5R3 EPB41L1 S100A16 MICAL1 EPB41L2 MYO6 ST3GAL2 YES1 HOMER2 RDX IQSEC3 POU6F1 GLUD1 CDK10 TMCC2 DZIP1 ACVRL1 NRSN1 FAM57B GRIK5 ARPC1B AATK BRCA1 PANX2 JPH3 ACADL SH3PXD2A TMEM44 NCS1 KIF1C IDS HIST2H3C2 DLGAP3 GIT1 TRP53I…
5623	cell	3.6007e-31	2.5325e-28	195/232 84.0%	14254/30001 47.5%	GLTP RPL4 IPO13 WIPF1 FRMPD1 PLEKHB1 EPS8 ZMIZ2 KDR TNS3 EPHB4 TNS1 TMEM8B UNC13C FBXO2 TALDO1 KCNQ4 PRR18 PRKD1 RPL29 EZR NBL1 TBC1D9B EPAS1 AGAP2 LPAR1 AGAP1 ZC3HAV1 TTBK1 CYB5R3 EPB41L1 S100A16 MICAL1 EPB41L2 MYO6 ST3GAL2 YES1 HOMER2 RDX IQSEC3 POU6F1 GLUD1 CDK10 TMCC2 DZIP1 ACVRL1 NRSN1 FAM57B GRIK5 ARPC1B AATK BRCA1 PANX2 JPH3 ACADL SH3PXD2A TMEM44 NCS1 KIF1C IDS HIST2H3C2 DLGAP3 GIT1 TRP53I…
5622	intracellular	1.3902e-30	7.3333e-28	161/232 69.3%	9782/30001 32.6%	GLTP RPL4 IPO13 WIPF1 FRMPD1 PLEKHB1 CIB1 UBE3B AMOT EPS8 STK11 ZMIZ2 KIF5B PALM KDR DENND5A TNS1 TMEM8B UNC13C FBXO2 PPP1R16A TALDO1 RPSA VRK3 KCNQ4 PRR18 PRKD1 RPL29 EZR NBL1 CSNK1G2 EMID1 RTN2 BRSK1 TBC1D9B EPAS1 CABP7 MAZ AGAP2 LPAR1 AGAP1 ZC3HAV1 TTBK1 FBXO41 CYB5R3 MOBP EPB41L1 S100A16 MICAL1 EPB41L2 CASKIN2 MYO6 MBP ST3GAL2 WDTC1 FDPS YES1 HOMER2 RDX IQSEC3 IDH2 EEF2 SYT7 SCRT1 POU6F1 GFAP…
5737	cytoplasm	3.6558e-27	1.5427e-24	128/232 55.1%	6766/30001 22.5%	GLTP RPL4 IPO13 WIPF1 FRMPD1 PLEKHB1 CIB1 AMOT STK11 KIF5B PALM KDR DENND5A TNS1 TMEM8B UNC13C FBXO2 PPP1R16A TALDO1 RPSA KCNQ4 PRR18 PRKD1 RPL29 EZR NBL1 CSNK1G2 EMID1 RTN2 BRSK1 EPAS1 CABP7 AGAP2 LPAR1 AGAP1 ZC3HAV1 TTBK1 CYB5R3 MOBP EPB41L1 S100A16 MICAL1 EPB41L2 CASKIN2 MYO6 MBP ST3GAL2 WDTC1 FDPS YES1 HOMER2 IQSEC3 IDH2 EEF2 SYT7 GFAP FBXO31 ARHGAP33 GLUD1 DIAPH1 NF2 DZIP1 B4GALT2 NRSN1 ITGB…
44424	intracellular part	1.1044e-26	3.8838e-24	153/232 65.9%	9546/30001 31.8%	GLTP RPL4 IPO13 WIPF1 FRMPD1 PLEKHB1 CIB1 AMOT EPS8 STK11 ZMIZ2 KIF5B PALM KDR DENND5A TNS1 TMEM8B UNC13C FBXO2 PPP1R16A TALDO1 RPSA VRK3 KCNQ4 PRR18 PRKD1 RPL29 EZR NBL1 CSNK1G2 EMID1 RTN2 BRSK1 EPAS1 CABP7 MAZ AGAP2 LPAR1 AGAP1 ZC3HAV1 TTBK1 CYB5R3 MOBP EPB41L1 S100A16 MICAL1 EPB41L2 CASKIN2 MYO6 MBP ST3GAL2 WDTC1 FDPS YES1 HOMER2 RDX IQSEC3 IDH2 EEF2 SYT7 SCRT1 POU6F1 GFAP FBXO31 ARHGAP33 GLUD…
5515	protein binding	1.6064e-22	4.8423e-20	106/232 45.6%	5384/30001 17.9%	RPL4 WIPF1 FRMPD1 PLEKHB1 CDH5 RIMS1 STK11 KIF5B PALM KDR DENND5A TNS3 EPHB4 TNS1 FBXO2 RPSA VRK3 DAAM2 EZR NBL1 CSNK1G2 EMID1 ABCG2 SHC3 EPAS1 MAZ AGAP2 LPAR1 GRK2 EPB41L1 S100A16 EPB41L2 NACC2 MYO6 WDTC1 YES1 HOMER2 RDX GFAP FBXO31 ARHGAP33 GLUD1 DIAPH1 MAP3K10 NF2 MXD4 ACVRL1 ZFP523 GRIK5 ARPC1B LMOD1 AATK ARRB1 BRCA1 PPP1R9B PANX2 SH3PXD2A ALDH2 IDS DLGAP3 GIT1 BCAS1 AMN VWF DST OLIG1 WNT9A A…
9987	cellular process	5.3726e-20	1.417e-17	136/232 58.6%	8926/30001 29.7%	RPL4 IPO13 WIPF1 CIB1 UBE3B AMOT EPS8 CDH5 RIMS1 STK11 RIMS4 KIF5B PALM KDR TNS3 EPHB4 TNS1 TMEM8B UNC13C KCNH3 FBXO2 TALDO1 RPSA VRK3 DAAM2 KCNQ4 PRKD1 RPL29 EZR NBL1 CSNK1G2 ABCG2 BRSK1 SHC3 EPAS1 MAZ AGAP2 LPAR1 AGAP1 TTBK1 GRK2 EPB41L1 EPB41L2 MYO6 CDH22 MBP ST3GAL2 WDTC1 FDPS YES1 RDX IDH2 EEF2 SYT7 SCRT1 POU6F1 GFAP FBXO31 ARHGAP33 GLUD1 DIAPH1 CDK10 MAP3K10 NF2 DZIP1 CDK16 MXD4 ACVRL1 ZFP5…
5886	plasma membrane	3.0253e-17	7.0928e-15	68/232 29.3%	2908/30001 9.6%	ITGB4 FRMPD1 GRIK5 CIB1 ARRB1 AMOT PPP1R9B EPS8 PANX2 CDH5 RIMS1 RIMS4 JPH3 NCS1 PALM KDR DLGAP3 TNS3 EPHB4 TNS1 TMEM8B UNC13C VWF DST GP1BB AKTIP PPP1R16A RPSA ARAP1 RHOC SNPH KCNQ4 LCP1 EZR SHANK3 ABCG2 AHNAK CABP7 CAMK2A LPAR1 ADCY4 ADCY1 ADCY5 FGD2 TRAK2 DDN NEURL1A GPR153 GRK2 GNG7 MYO6 CDH22 GNA12 KISS1R MBP ABCB1A PDLIM5 RASL10B RDX ERBIN SYT7 ARHGAP33 DIAPH1 APC PTPN6 NF2 LIMS2 CRLF2
8092	cytoskeletal protein binding	1.6994e-16	3.5857e-14	26/232 11.2%	406/30001 1.3%	HDAC5 WIPF1 ARPC1B LMOD1 CAPG PPP1R9B PDLIM2 EPB41L1 EPB41L2 KIF5B MYO6 PDLIM5 TNS1 GSN DST HOMER2 MTSS1L DIAPH1 FMNL2 APC DAAM2 PALLD NF2 LCP1 EZR NBL1
42995	cell projection	1.0804e-14	2.0724e-12	34/232 14.6%	877/30001 2.9%	ACVRL1 NRSN1 GRIK5 PLEKHB1 CAMK2A LPAR1 ADCY4 CIB1 ARRB1 FGD2 AMOT PPP1R9B DDN GRK2 SH3PXD2A KIF5B MYO6 NCS1 GNA12 KDR MBP DLGAP3 GSN FBXO2 RDX KCNAB2 DIAPH1 VGF APC PALLD KCNQ4 NF2 LCP1 EZR
3779	actin binding	5.9806e-14	1.0516e-11	20/232 8.6%	276/30001 0.9%	HDAC5 GSN DST WIPF1 HOMER2 ARPC1B MTSS1L CAPG PPP1R9B DIAPH1 FMNL2 DAAM2 EPB41L1 PALLD EPB41L2 MYO6 LCP1 PDLIM5 NBL1 TNS1
43229	intracellular organelle	1.5445e-13	2.5069e-11	115/232 49.5%	8080/30001 26.9%	RPL4 IPO13 WIPF1 FRMPD1 PLEKHB1 CIB1 AMOT EPS8 STK11 ZMIZ2 KIF5B DENND5A TMEM8B RPSA VRK3 PRR18 RPL29 EZR NBL1 EMID1 RTN2 BRSK1 EPAS1 CABP7 MAZ AGAP2 ZC3HAV1 CYB5R3 MOBP EPB41L1 S100A16 MICAL1 EPB41L2 MYO6 MBP ST3GAL2 WDTC1 FDPS RDX IDH2 SYT7 SCRT1 POU6F1 GFAP FBXO31 GLUD1 DIAPH1 CDK10 NF2 DZIP1 MXD4 B4GALT2 ZFP523 NRSN1 ARPC1B LMOD1 ARRB1 BRCA1 HK2 PPP1R9B JPH3 ACADL ALDH2 NCS1 MYO18B KIF1C IDS …
43226	organelle	1.9369e-13	2.9192e-11	115/232 49.5%	8105/30001 27.0%	RPL4 IPO13 WIPF1 FRMPD1 PLEKHB1 CIB1 AMOT EPS8 STK11 ZMIZ2 KIF5B DENND5A TMEM8B RPSA VRK3 PRR18 RPL29 EZR NBL1 EMID1 RTN2 BRSK1 EPAS1 CABP7 MAZ AGAP2 ZC3HAV1 CYB5R3 MOBP EPB41L1 S100A16 MICAL1 EPB41L2 MYO6 MBP ST3GAL2 WDTC1 FDPS RDX IDH2 SYT7 SCRT1 POU6F1 GFAP FBXO31 GLUD1 DIAPH1 CDK10 NF2 DZIP1 MXD4 B4GALT2 ZFP523 NRSN1 ARPC1B LMOD1 ARRB1 BRCA1 HK2 PPP1R9B JPH3 ACADL ALDH2 NCS1 MYO18B KIF1C IDS …
30054	cell junction	2.3126e-13	3.2531e-11	25/232 10.7%	505/30001 1.6%	AHNAK GRIK5 CAMK2A AMOT PPP1R9B PANX2 CDH5 RIMS1 RIMS4 NCS1 DLGAP3 ABCB1A PDLIM5 TNS3 TNS1 UNC13C DST ERBIN SYT7 APC SNPH NF2 LCP1 SHANK3 LIMS2
16020	membrane	3.0399e-13	4.0089e-11	108/232 46.5%	7393/30001 24.6%	FRMPD1 PLEKHB1 CIB1 AMOT EPS8 CDH5 RIMS1 RIMS4 PALM KDR DENND5A TNS3 EPHB4 TNS1 TMEM8B UNC13C KCNH3 PPP1R16A RPSA KCNQ4 PRKD1 EZR NBL1 ABCG2 RTN2 TBC1D9B CABP7 LPAR1 CYB5R3 GRK2 TMEM28 EPB41L1 EPB41L2 MYO6 CDH22 MBP ST3GAL2 RASL10B RDX IDH2 SYT7 ARHGAP33 GLUD1 DIAPH1 TMCC2 NF2 CNIH2 ACVRL1 B4GALT2 NRSN1 FAM57B ITGB4 GRIK5 AATK ARRB1 ELFN2 PPP1R9B PANX2 JPH3 ACADL TMEM44 NCS1 DLGAP3 PSD AMN VWF DS…
50794	regulation of cellular process	4.0381e-13	5.012e-11	98/232 42.2%	6373/30001 21.2%	FRMPD1 AMOT CDH5 RIMS1 STK11 PALM KDR TNS3 TNS1 UNC13C KCNH3 FBXO2 VRK3 KCNQ4 EZR BRSK1 TBC1D9B EPAS1 MAZ AGAP2 LPAR1 AGAP1 GRK2 EPB41L2 MYO6 MBP WDTC1 FDPS RASL10B IQSEC3 SYT7 SCRT1 POU6F1 FBXO31 ARHGAP33 GLUD1 MAP3K10 NF2 MXD4 ACVRL1 ZFP523 GRIK5 ARPC1B ARRB1 BRCA1 PPP1R9B ACADL NCS1 GIT1 PSD AMN EGFL7 DST AKTIP OLIG1 WNT9A ARAP1 RHOC SIRT2 SIRT3 MED25 VGF TRAF3 SNPH PALLD SHANK3 KANK2 HDAC5 ZF…
50789	regulation of biological process	1.2654e-12	1.4833e-10	100/232 43.1%	6698/30001 22.3%	FRMPD1 AMOT CDH5 RIMS1 STK11 PALM KDR TNS3 TNS1 TMEM8B UNC13C KCNH3 FBXO2 VRK3 KCNQ4 EZR BRSK1 TBC1D9B EPAS1 MAZ AGAP2 LPAR1 AGAP1 ZC3HAV1 GRK2 EPB41L2 MYO6 MBP WDTC1 FDPS RASL10B IQSEC3 SYT7 SCRT1 POU6F1 FBXO31 ARHGAP33 GLUD1 MAP3K10 NF2 MXD4 ACVRL1 ZFP523 GRIK5 ARPC1B ARRB1 BRCA1 PPP1R9B ACADL NCS1 GIT1 PSD AMN EGFL7 DST AKTIP OLIG1 WNT9A ARAP1 RHOC SIRT2 SIRT3 MED25 VGF TRAF3 SNPH PALLD SHANK3…
44459	plasma membrane part	2.1699e-12	2.2907e-10	40/232 17.2%	1445/30001 4.8%	AHNAK ITGB4 GRIK5 CAMK2A AMOT PPP1R9B EPS8 PANX2 CDH5 RIMS1 RIMS4 GRK2 GNG7 MYO6 NCS1 GNA12 KDR KISS1R DLGAP3 ABCB1A PDLIM5 TNS3 EPHB4 TNS1 UNC13C VWF DST GP1BB ERBIN SYT7 APC SNPH KCNQ4 PTPN6 NF2 LCP1 EZR SHANK3 LIMS2 ABCG2
10646	regulation of cell communication	2.1713e-12	2.2907e-10	31/232 13.3%	880/30001 2.9%	TBC1D9B GRIK5 CAMK2A AGAP2 LPAR1 AGAP1 ARRB1 FGD2 RIMS1 STK11 FGD6 GRK2 MYO6 NCS1 KDR KISS1R GIT1 PSD IQSEC3 WNT9A ARAP1 VRK3 SYT7 GLUD1 PINK1 VGF APC SGSM2 KCNQ4 PTPN6 NF2
6464	protein modification process	2.5788e-12	2.5911e-10	36/232 15.5%	1190/30001 3.9%	ACVRL1 BRSK1 HDAC5 CAMK2A LPAR1 AATK ARRB1 UBE3B TTBK1 TRAK2 STK11 GRK2 KDR KISS1R PAK6 EPHB4 ST3GAL2 MAP4K4 YES1 FBXO2 AKTIP VEGFB VRK3 POMGNT1 SIRT2 SIRT3 HIPK2 PINK1 SBK1 CDK10 MAP3K10 PTPN6 PRKD1 CSNK1G2 CDK16 ST6GALNAC6
44267	cellular protein metabolic process	3.1603e-12	3.031e-10	43/232 18.5%	1671/30001 5.5%	RPL4 ACVRL1 BRSK1 HDAC5 CAMK2A LPAR1 AATK ARRB1 UBE3B TTBK1 TRAK2 STK11 GRK2 KDR KISS1R PAK6 RPS2 RPL18 EPHB4 ST3GAL2 MAP4K4 YES1 FBXO2 AKTIP VEGFB RPSA VRK3 EEF2 POMGNT1 SIRT2 PSMB8 SIRT3 HIPK2 PINK1 SBK1 CDK10 MAP3K10 PTPN6 PRKD1 RPL29 CSNK1G2 CDK16 ST6GALNAC6
5856	cytoskeleton	3.3971e-12	3.0819e-10	35/232 15.0%	1138/30001 3.7%	HDAC5 WIPF1 FRMPD1 ARPC1B LMOD1 BRCA1 UACA FGD2 PPP1R9B EPS8 FGD6 PDLIM2 EPB41L1 MICAL1 EPB41L2 KIF5B MYO6 MYO18B KIF1C PDLIM5 GSN DST MYO10 SIRT2 GFAP FBXO31 DIAPH1 KIFC2 APC PALLD NF2 LCP1 EZR NBL1 SHANK3
65007	biological regulation	3.5055e-12	3.0819e-10	103/232 44.3%	7125/30001 23.7%	FRMPD1 AMOT CDH5 RIMS1 STK11 PALM KDR DENND5A TNS3 TNS1 TMEM8B UNC13C KCNH3 FBXO2 VRK3 KCNQ4 EZR BRSK1 TBC1D9B EPAS1 MAZ AGAP2 LPAR1 AGAP1 ZC3HAV1 GRK2 EPB41L2 MYO6 MBP WDTC1 FDPS RASL10B IQSEC3 SYT7 SCRT1 POU6F1 FBXO31 ARHGAP33 GLUD1 MAP3K10 NF2 MXD4 ACVRL1 ZFP523 GRIK5 ARPC1B ARRB1 BRCA1 PPP1R9B ACADL NCS1 GIT1 PSD AMN EGFL7 VWF DST GP1BB AKTIP OLIG1 WNT9A ARAP1 RHOC SIRT2 SIRT3 MED25 VGF TRAF3…
46872	metal ion binding	8.4359e-12	7.1199e-10	61/232 26.2%	3148/30001 10.4%	ACVRL1 B4GALT2 ZFP523 CIB1 BRCA1 CDH5 RIMS1 STK11 ZMIZ2 NCS1 IDS TNS3 GIT1 UNC13C AMN EGFL7 DST ARAP1 SIRT2 SIRT3 TRAF3 CTDSP2 PRKD1 LCP1 SHANK3 CSNK1G2 TRIM56 BRSK1 HDAC5 ZFP423 TBC1D9B CABP7 MAZ AGAP2 ADCY4 AGAP1 ZC3HAV1 ADCY1 FBXO41 ADCY5 FGD2 MLLT6 NEURL1A NEURL1B FGD6 PDLIM2 S100A16 MICAL1 MGAT5B CDH22 PDLIM5 SLC25A23 FDPS IDH2 SYT7 SCRT1 FBXO31 PINK1 DZIP1 PLCD3 LIMS2
43412	macromolecule modification	1.0008e-11	8.1216e-10	36/232 15.5%	1248/30001 4.1%	ACVRL1 BRSK1 HDAC5 CAMK2A LPAR1 AATK ARRB1 UBE3B TTBK1 TRAK2 STK11 GRK2 KDR KISS1R PAK6 EPHB4 ST3GAL2 MAP4K4 YES1 FBXO2 AKTIP VEGFB VRK3 POMGNT1 SIRT2 SIRT3 HIPK2 PINK1 SBK1 CDK10 MAP3K10 PTPN6 PRKD1 CSNK1G2 CDK16 ST6GALNAC6
43169	cation binding	1.3403e-11	1.0474e-09	61/232 26.2%	3183/30001 10.6%	ACVRL1 B4GALT2 ZFP523 CIB1 BRCA1 CDH5 RIMS1 STK11 ZMIZ2 NCS1 IDS TNS3 GIT1 UNC13C AMN EGFL7 DST ARAP1 SIRT2 SIRT3 TRAF3 CTDSP2 PRKD1 LCP1 SHANK3 CSNK1G2 TRIM56 BRSK1 HDAC5 ZFP423 TBC1D9B CABP7 MAZ AGAP2 ADCY4 AGAP1 ZC3HAV1 ADCY1 FBXO41 ADCY5 FGD2 MLLT6 NEURL1A NEURL1B FGD6 PDLIM2 S100A16 MICAL1 MGAT5B CDH22 PDLIM5 SLC25A23 FDPS IDH2 SYT7 SCRT1 FBXO31 PINK1 DZIP1 PLCD3 LIMS2
43167	ion binding	1.5079e-11	1.1363e-09	61/232 26.2%	3192/30001 10.6%	ACVRL1 B4GALT2 ZFP523 CIB1 BRCA1 CDH5 RIMS1 STK11 ZMIZ2 NCS1 IDS TNS3 GIT1 UNC13C AMN EGFL7 DST ARAP1 SIRT2 SIRT3 TRAF3 CTDSP2 PRKD1 LCP1 SHANK3 CSNK1G2 TRIM56 BRSK1 HDAC5 ZFP423 TBC1D9B CABP7 MAZ AGAP2 ADCY4 AGAP1 ZC3HAV1 ADCY1 FBXO41 ADCY5 FGD2 MLLT6 NEURL1A NEURL1B FGD6 PDLIM2 S100A16 MICAL1 MGAT5B CDH22 PDLIM5 SLC25A23 FDPS IDH2 SYT7 SCRT1 FBXO31 PINK1 DZIP1 PLCD3 LIMS2
43228	non-membrane-bounded organelle	3.4196e-11	2.4051e-09	43/232 18.5%	1799/30001 5.9%	RPL4 HDAC5 WIPF1 FRMPD1 ARPC1B LMOD1 BRCA1 UACA CENPB FGD2 PPP1R9B EPS8 FGD6 PDLIM2 EPB41L1 S100A16 MICAL1 EPB41L2 KIF5B MYO6 MYO18B KIF1C RPS2 RPL18 PDLIM5 GSN DST MYO10 RDX RPSA SIRT2 GFAP FBXO31 DIAPH1 KIFC2 APC PALLD NF2 LCP1 RPL29 EZR NBL1 SHANK3
43232	intracellular non-membrane-bounded organelle	3.4196e-11	2.4051e-09	43/232 18.5%	1799/30001 5.9%	RPL4 HDAC5 WIPF1 FRMPD1 ARPC1B LMOD1 BRCA1 UACA CENPB FGD2 PPP1R9B EPS8 FGD6 PDLIM2 EPB41L1 S100A16 MICAL1 EPB41L2 KIF5B MYO6 MYO18B KIF1C RPS2 RPL18 PDLIM5 GSN DST MYO10 RDX RPSA SIRT2 GFAP FBXO31 DIAPH1 KIFC2 APC PALLD NF2 LCP1 RPL29 EZR NBL1 SHANK3
166	nucleotide binding	4.6098e-11	3.1377e-09	46/232 19.8%	2043/30001 6.8%	ACVRL1 BRSK1 MVK CAMK2A AGAP2 ADCY4 AGAP1 AATK ADCY1 TTBK1 HK2 ADCY5 STK11 CYB5R3 GRK2 ACADL KIF5B MYO6 MYO18B GNA12 KDR KIF1C PAK6 EPHB4 MAP4K4 YES1 MYO10 RASL10B IDH2 RHOC VRK3 EEF2 SIRT2 SIRT3 HIPK2 GLUD1 PINK1 SBK1 KIFC2 CDK10 MAP3K10 PRKD1 CSNK1G2 RBMS2 CDK16 ABCG2
16043	cellular component organization	5.6719e-11	3.7399e-09	45/232 19.3%	1979/30001 6.5%	ACVRL1 HDAC5 WIPF1 EPAS1 ITGB4 GRIK5 AGAP2 LPAR1 CAPG ARRB1 BRCA1 ADCY1 NTN1 PPP1R9B EPS8 NEURL1A STK11 ACADL EPB41L1 EPB41L2 KIF5B MYO6 PALM KDR RPS2 TNS1 GSN DST RDX MTSS1L KCNAB2 SIRT2 SYT7 FBXO31 DIAPH1 FMNL2 APC DAAM2 SNPH PALLD VWA1 NF2 LCP1 NBL1 SHANK3
17076	purine nucleotide binding	8.2431e-11	5.1381e-09	42/232 18.1%	1775/30001 5.9%	ACVRL1 BRSK1 MVK CAMK2A AGAP2 ADCY4 AGAP1 AATK ADCY1 TTBK1 HK2 ADCY5 STK11 CYB5R3 GRK2 ACADL KIF5B MYO6 MYO18B GNA12 KDR KIF1C PAK6 EPHB4 MAP4K4 YES1 MYO10 RASL10B RHOC VRK3 EEF2 HIPK2 GLUD1 PINK1 SBK1 KIFC2 CDK10 MAP3K10 PRKD1 CSNK1G2 CDK16 ABCG2
32555	purine ribonucleotide binding	8.3723e-11	5.1381e-09	41/232 17.6%	1702/30001 5.6%	ACVRL1 BRSK1 MVK CAMK2A AGAP2 ADCY4 AGAP1 AATK ADCY1 TTBK1 HK2 ADCY5 STK11 CYB5R3 GRK2 KIF5B MYO6 MYO18B GNA12 KDR KIF1C PAK6 EPHB4 MAP4K4 YES1 MYO10 RASL10B RHOC VRK3 EEF2 HIPK2 GLUD1 PINK1 SBK1 KIFC2 CDK10 MAP3K10 PRKD1 CSNK1G2 CDK16 ABCG2
32553	ribonucleotide binding	8.5229e-11	5.1381e-09	41/232 17.6%	1703/30001 5.6%	ACVRL1 BRSK1 MVK CAMK2A AGAP2 ADCY4 AGAP1 AATK ADCY1 TTBK1 HK2 ADCY5 STK11 CYB5R3 GRK2 KIF5B MYO6 MYO18B GNA12 KDR KIF1C PAK6 EPHB4 MAP4K4 YES1 MYO10 RASL10B RHOC VRK3 EEF2 HIPK2 GLUD1 PINK1 SBK1 KIFC2 CDK10 MAP3K10 PRKD1 CSNK1G2 CDK16 ABCG2
6468	protein amino acid phosphorylation	1.363e-10	7.9889e-09	24/232 10.3%	624/30001 2.0%	ACVRL1 BRSK1 YES1 CAMK2A LPAR1 AATK ARRB1 VRK3 TTBK1 HIPK2 STK11 PINK1 GRK2 SBK1 KDR KISS1R CDK10 PAK6 MAP3K10 PRKD1 EPHB4 CSNK1G2 CDK16 MAP4K4
7010	cytoskeleton organization	1.7928e-10	1.0224e-08	17/232 7.3%	295/30001 0.9%	GSN DST WIPF1 AGAP2 BRCA1 FBXO31 PPP1R9B EPS8 NEURL1A DIAPH1 FMNL2 DAAM2 EPB41L1 EPB41L2 PALM LCP1 NBL1
65009	regulation of molecular function	2.2397e-10	1.2436e-08	28/232 12.0%	871/30001 2.9%	TBC1D9B AGAP2 LPAR1 ADCY4 AGAP1 ARRB1 MLLT1 ADCY1 UACA ADCY5 GNG7 NCS1 PALM KISS1R DENND5A GIT1 TNS1 WDTC1 AKTIP WNT9A ARAP1 VRK3 HIPK2 FBXO31 ARHGAP33 SGSM2 PTPN6 NF2
32559	adenyl ribonucleotide binding	2.4753e-10	1.3392e-08	36/232 15.5%	1401/30001 4.6%	ACVRL1 BRSK1 MVK CAMK2A AGAP2 ADCY4 AATK ADCY1 TTBK1 HK2 ADCY5 STK11 CYB5R3 GRK2 KIF5B MYO6 MYO18B KDR KIF1C PAK6 EPHB4 MAP4K4 YES1 MYO10 VRK3 HIPK2 GLUD1 PINK1 SBK1 KIFC2 CDK10 MAP3K10 PRKD1 CSNK1G2 CDK16 ABCG2
30554	adenyl nucleotide binding	2.5829e-10	1.3625e-08	37/232 15.9%	1474/30001 4.9%	ACVRL1 BRSK1 MVK CAMK2A AGAP2 ADCY4 AATK ADCY1 TTBK1 HK2 ADCY5 STK11 CYB5R3 GRK2 ACADL KIF5B MYO6 MYO18B KDR KIF1C PAK6 EPHB4 MAP4K4 YES1 MYO10 VRK3 HIPK2 GLUD1 PINK1 SBK1 KIFC2 CDK10 MAP3K10 PRKD1 CSNK1G2 CDK16 ABCG2
51128	regulation of cellular component organization	2.6627e-10	1.3703e-08	20/232 8.6%	438/30001 1.4%	KANK2 HDAC5 GSN DST GRIK5 ARPC1B LPAR1 CAPG NTN1 APC SNPH PALLD EPB41L2 NCS1 PALM GNA12 KISS1R MBP EZR PDLIM5
43687	post-translational protein modification	2.8372e-10	1.4253e-08	30/232 12.9%	1005/30001 3.3%	ACVRL1 BRSK1 HDAC5 CAMK2A LPAR1 AATK ARRB1 TTBK1 STK11 GRK2 KDR KISS1R PAK6 EPHB4 MAP4K4 YES1 FBXO2 AKTIP VRK3 SIRT2 SIRT3 HIPK2 PINK1 SBK1 CDK10 MAP3K10 PTPN6 PRKD1 CSNK1G2 CDK16
16773	phosphotransferase activity, alcohol group as acceptor	3.2979e-10	1.6183e-08	24/232 10.3%	652/30001 2.1%	ACVRL1 KCNH3 BRSK1 YES1 MVK CAMK2A AATK VRK3 TTBK1 HK2 HIPK2 STK11 PINK1 GRK2 SBK1 KDR CDK10 PAK6 MAP3K10 PRKD1 EPHB4 CSNK1G2 CDK16 MAP4K4
4672	protein kinase activity	3.7548e-10	1.7517e-08	22/232 9.4%	548/30001 1.8%	ACVRL1 KCNH3 BRSK1 YES1 CAMK2A AATK VRK3 TTBK1 HIPK2 STK11 PINK1 GRK2 SBK1 KDR CDK10 PAK6 MAP3K10 PRKD1 EPHB4 CSNK1G2 CDK16 MAP4K4
44444	cytoplasmic part	3.8101e-10	1.7517e-08	69/232 29.7%	4193/30001 13.9%	RPL4 B4GALT2 NRSN1 WIPF1 ITGB4 PLEKHB1 CIB1 ARRB1 BRCA1 HK2 AMOT PPP1R9B JPH3 ACADL ALDH2 KIF5B NCS1 MYO18B KIF1C IDS DENND5A TNS1 TMEM8B BCAS1 HSDL2 DST FBXO2 PPP1R16A TALDO1 RPSA ARAP1 POMGNT1 SIRT3 VGF SNPH PRR18 RPL29 EZR EMID1 ST6GALNAC6 RTN2 HDAC5 MVK CABP7 AGAP2 AGAP1 UACA ADCY5 FGD2 DDN CYB5R3 OS9 MOBP MGAT5B MYO6 RPS2 RPL18 PDLIM5 SLC25A23 ST3GAL2 WDTC1 FDPS GSN IDH2 SYT7 GLUD1 PINK1 APC…
1883	purine nucleoside binding	3.8189e-10	1.7517e-08	37/232 15.9%	1495/30001 4.9%	ACVRL1 BRSK1 MVK CAMK2A AGAP2 ADCY4 AATK ADCY1 TTBK1 HK2 ADCY5 STK11 CYB5R3 GRK2 ACADL KIF5B MYO6 MYO18B KDR KIF1C PAK6 EPHB4 MAP4K4 YES1 MYO10 VRK3 HIPK2 GLUD1 PINK1 SBK1 KIFC2 CDK10 MAP3K10 PRKD1 CSNK1G2 CDK16 ABCG2
16310	phosphorylation	3.9862e-10	1.7896e-08	26/232 11.2%	773/30001 2.5%	ACVRL1 BRSK1 MVK CAMK2A LPAR1 AATK ARRB1 TTBK1 HK2 STK11 GRK2 KDR KISS1R PAK6 EPHB4 MAP4K4 YES1 VRK3 HIPK2 PINK1 SBK1 CDK10 MAP3K10 PRKD1 CSNK1G2 CDK16
1882	nucleoside binding	4.2644e-10	1.8746e-08	37/232 15.9%	1501/30001 5.0%	ACVRL1 BRSK1 MVK CAMK2A AGAP2 ADCY4 AATK ADCY1 TTBK1 HK2 ADCY5 STK11 CYB5R3 GRK2 ACADL KIF5B MYO6 MYO18B KDR KIF1C PAK6 EPHB4 MAP4K4 YES1 MYO10 VRK3 HIPK2 GLUD1 PINK1 SBK1 KIFC2 CDK10 MAP3K10 PRKD1 CSNK1G2 CDK16 ABCG2
5524	ATP binding	5.8209e-10	2.5065e-08	35/232 15.0%	1375/30001 4.5%	ACVRL1 BRSK1 MVK CAMK2A AGAP2 ADCY4 AATK ADCY1 TTBK1 HK2 ADCY5 STK11 GRK2 KIF5B MYO6 MYO18B KDR KIF1C PAK6 EPHB4 MAP4K4 YES1 MYO10 VRK3 HIPK2 GLUD1 PINK1 SBK1 KIFC2 CDK10 MAP3K10 PRKD1 CSNK1G2 CDK16 ABCG2
43005	neuron projection	6.9842e-10	2.9473e-08	20/232 8.6%	463/30001 1.5%	ACVRL1 NRSN1 FBXO2 GRIK5 CAMK2A LPAR1 ADCY4 KCNAB2 DDN GRK2 VGF APC PALLD KIF5B MYO6 NCS1 KDR KCNQ4 MBP DLGAP3
45202	synapse	9.205e-10	3.8084e-08	19/232 8.1%	421/30001 1.4%	UNC13C GRIK5 CAMK2A ARRB1 SYT7 PPP1R9B EPS8 RIMS1 RIMS4 GRK2 SNPH MYO6 NCS1 NF2 DLGAP3 PDLIM5 SHANK3 MGLL SHANK1
50790	regulation of catalytic activity	9.5512e-10	3.8756e-08	25/232 10.7%	746/30001 2.4%	TBC1D9B AGAP2 LPAR1 ADCY4 AGAP1 ARRB1 MLLT1 ADCY1 UACA ADCY5 GNG7 PALM KISS1R DENND5A GIT1 TNS1 WDTC1 WNT9A ARAP1 VRK3 FBXO31 ARHGAP33 SGSM2 PTPN6 NF2
