# Supplementary material for: The Differences in Local Translatome across Distinct Neuron Types Is Mediated by Both Baseline Cellular Differences and Post-transcriptional Mechanisms
Source: eNeuro. 2019 Feb 4;5(6):ENEURO.0320-18.2018. doi: 10.1523/ENEURO.0320-18.2018 (PMC6361723; doi:10.1523/ENEURO.0320-18.2018)
Supplement: Figure 4-2 — GO analysis results of VGAT local translation candidates with a significance cutoff, p = 5E-8. Full table of GO analysis results of VGAT local translation candidates with a significance cutoff, p = 5E-8. Column headers are as in Figure 4-1. Download Figure 4-2, XLS file. [file sup_enu-eN-NWR-0320-18-s10.xls]

## Sheet: Sheet1
GO-ID	Description	p-value	corr p-val	cluster freq	total freq	genes
5488	binding	1.0479e-49	3.3366e-46	304/443 68.6%	10287/29994 34.2%	RPL4 GLTP CYFIP1 WIPF1 FRMPD1 PLEKHB1 ABAT IFIT3 RPL7 RPS6KA4 RPS15 RASSF2 RPS18 FTH1 RPS6KA1 KDR PLCE1 PGLYRP1 BSN TNS3 EPHB4 CDK5RAP2 TNS1 UNC13C LIMCH1 SCRIB PHKA1 ANK2 EBF4 ANK3 MAPK8IP2 4931406C07RIK AFG3L1 LARS2 CLDN5 RBP4 CARHSP1 DAAM1 DAAM2 ATF5 RPL29 EZR RIN2 MACF1 TBC1D9B EPAS1 AGAP2 LPAR1 AGAP1 TTBK1 CYB5R3 RNF213 EPB41L1 PCBP4 EPB41L2 INPP5D MYO6 SPTBN1 PEA15A YES1 HOMER2 RDX GRIN2C P…
9987	cellular process	2.8493e-49	4.5361e-46	281/443 63.4%	8922/29994 29.7%	RPL4 CYFIP1 WIPF1 ABAT SLC4A2 RPL7 EPS8 RPS6KA4 RPS15 RPS14 RASSF2 RPS19 RPL18A RPS18 FTH1 RPS6KA1 KDR PGLYRP1 TNS3 RPS10 EPHB4 TNS1 UNC13C LIMCH1 HUS1 SCRIB PHKA1 ANK2 EBF4 ANK3 MAPK8IP2 LARS2 CLDN5 RBP4 DAAM1 DAAM2 KCNQ4 ATF5 RPL29 EZR RIN2 SLC45A4 MACF1 EPAS1 AGAP2 LPAR1 AGAP1 TTBK1 EPB41L1 EPB41L2 INPP5D MYO6 KCNMB4 ST3GAL2 SPTBN1 PEA15A GSDMD YES1 RDX GRIN2C PARP14 POU6F1 GLUD1 SLC6A8 PARVG …
44464	cell part	1.0217e-48	8.2986e-46	359/443 81.0%	14248/29994 47.5%	RPL4 GLTP CYFIP1 WIPF1 FRMPD1 PLEKHB1 ABAT SLC4A2 RPL7 LY6C1 EPS8 RPS6KA4 RPS15 RPS14 RPS19 RPL18A RPS18 FTH1 RPS6KA1 KDR PLCE1 PGLYRP1 BSN TNS3 RPS10 EPHB4 CDK5RAP2 TNS1 UNC13C HUS1 SCRIB PHKA1 ANK2 EBF4 ANK3 MAPK8IP2 4931406C07RIK AFG3L1 LARS2 CLDN5 RBP4 DAAM1 KCNQ4 PRR18 ATF5 RPL29 EZR RIN2 SLC45A4 MACF1 TBC1D9B EPAS1 AGAP2 LPAR1 AGAP1 TTBK1 CYB5R3 EPB41L1 PCBP4 EPB41L2 INPP5D MYO6 KCNMB4 ST3G…
5623	cell	1.0425e-48	8.2986e-46	359/443 81.0%	14249/29994 47.5%	RPL4 GLTP CYFIP1 WIPF1 FRMPD1 PLEKHB1 ABAT SLC4A2 RPL7 LY6C1 EPS8 RPS6KA4 RPS15 RPS14 RPS19 RPL18A RPS18 FTH1 RPS6KA1 KDR PLCE1 PGLYRP1 BSN TNS3 RPS10 EPHB4 CDK5RAP2 TNS1 UNC13C HUS1 SCRIB PHKA1 ANK2 EBF4 ANK3 MAPK8IP2 4931406C07RIK AFG3L1 LARS2 CLDN5 RBP4 DAAM1 KCNQ4 PRR18 ATF5 RPL29 EZR RIN2 SLC45A4 MACF1 TBC1D9B EPAS1 AGAP2 LPAR1 AGAP1 TTBK1 CYB5R3 EPB41L1 PCBP4 EPB41L2 INPP5D MYO6 KCNMB4 ST3G…
5622	intracellular	1.512e-48	9.6283e-46	294/443 66.3%	9777/29994 32.5%	RPL4 GLTP CYFIP1 WIPF1 FRMPD1 PLEKHB1 ABAT RPL7 EPS8 RPS6KA4 RPS15 RPS14 RPS19 RPL18A RPS18 FTH1 RPS6KA1 KDR PLCE1 PGLYRP1 BSN RPS10 CDK5RAP2 TNS1 UNC13C HUS1 SCRIB PHKA1 ANK2 EBF4 MAPK8IP2 4931406C07RIK AFG3L1 LARS2 RBP4 DAAM1 KCNQ4 PRR18 ATF5 RPL29 EZR RIN2 MACF1 TBC1D9B EPAS1 AGAP2 LPAR1 AGAP1 TTBK1 CYB5R3 EPB41L1 PCBP4 EPB41L2 INPP5D MYO6 ST3GAL2 SPTBN1 PEA15A YES1 HOMER2 RDX IQSEC3 GRIN2C PA…
5515	protein binding	4.1788e-47	2.2175e-44	211/443 47.6%	5382/29994 17.9%	RPL4 CYFIP1 WIPF1 FRMPD1 PLEKHB1 IFIT3 RPL7 RPS6KA4 RPS15 RASSF2 RPS6KA1 KDR PLCE1 PGLYRP1 TNS3 EPHB4 CDK5RAP2 TNS1 LIMCH1 SCRIB PHKA1 ANK2 EBF4 ANK3 MAPK8IP2 CLDN5 CARHSP1 DAAM1 DAAM2 ATF5 EZR RIN2 MACF1 EPAS1 AGAP2 LPAR1 EPB41L1 EPB41L2 INPP5D MYO6 SPTBN1 PEA15A YES1 HOMER2 RDX GRIN2C PARP14 GLUD1 PARVG WNK1 PNOC ID4 RGL3 GRAP RPS24 ACVRL1 PYGB ROBO4 CLIC4 HIP1 ARPC1B GRIK5 AATK FMN2 BRCA1 TRIM…
5737	cytoplasm	2.7241e-44	1.2391e-41	234/443 52.8%	6763/29994 22.5%	RPL4 GLTP CYFIP1 WIPF1 FRMPD1 PLEKHB1 ABAT RPL7 RPS15 RPS14 RPS19 RPL18A RPS18 FTH1 RPS6KA1 KDR PLCE1 PGLYRP1 BSN RPS10 CDK5RAP2 TNS1 UNC13C HUS1 SCRIB PHKA1 ANK2 MAPK8IP2 AFG3L1 LARS2 DAAM1 KCNQ4 PRR18 ATF5 RPL29 EZR RIN2 MACF1 EPAS1 AGAP2 LPAR1 AGAP1 TTBK1 CYB5R3 EPB41L1 PCBP4 EPB41L2 INPP5D MYO6 ST3GAL2 SPTBN1 PEA15A YES1 HOMER2 IQSEC3 PARP14 RPS26 GLUD1 PARVG WNK1 RPS20 DZIP1 FERMT2 RPS24 CLI…
44424	intracellular part	1.2386e-43	4.9298e-41	282/443 63.6%	9541/29994 31.8%	RPL4 GLTP CYFIP1 WIPF1 FRMPD1 PLEKHB1 ABAT RPL7 EPS8 RPS6KA4 RPS15 RPS14 RPS19 RPL18A RPS18 FTH1 RPS6KA1 KDR PLCE1 PGLYRP1 BSN RPS10 CDK5RAP2 TNS1 UNC13C HUS1 SCRIB PHKA1 ANK2 EBF4 MAPK8IP2 4931406C07RIK AFG3L1 LARS2 RBP4 DAAM1 KCNQ4 PRR18 ATF5 RPL29 EZR RIN2 MACF1 EPAS1 AGAP2 LPAR1 AGAP1 TTBK1 CYB5R3 EPB41L1 PCBP4 EPB41L2 INPP5D MYO6 ST3GAL2 SPTBN1 PEA15A YES1 HOMER2 RDX IQSEC3 GRIN2C PARP14 POU…
43229	intracellular organelle	7.0397e-28	2.4905e-25	227/443 51.2%	8076/29994 26.9%	RPL4 WIPF1 FRMPD1 PLEKHB1 ABAT RPL7 EPS8 RPS6KA4 RPS15 RPS14 RPS19 RPL18A RPS18 FTH1 RPS6KA1 PLCE1 BSN RPS10 CDK5RAP2 HUS1 ANK2 EBF4 4931406C07RIK AFG3L1 LARS2 RBP4 PRR18 ATF5 RPL29 EZR RIN2 MACF1 EPAS1 AGAP2 CYB5R3 EPB41L1 EPB41L2 MYO6 ST3GAL2 SPTBN1 PEA15A RDX GRIN2C PARP14 POU6F1 RPS26 GLUD1 PARVG ID4 RPS20 DZIP1 FERMT2 RPS24 CLIC4 HIP1 RPLP1 ARPC1B RPLP0 PYGM FMN2 BRCA1 TRIM8 JPH3 ACADL HIST2…
43226	organelle	1.122e-27	3.5724e-25	227/443 51.2%	8101/29994 27.0%	RPL4 WIPF1 FRMPD1 PLEKHB1 ABAT RPL7 EPS8 RPS6KA4 RPS15 RPS14 RPS19 RPL18A RPS18 FTH1 RPS6KA1 PLCE1 BSN RPS10 CDK5RAP2 HUS1 ANK2 EBF4 4931406C07RIK AFG3L1 LARS2 RBP4 PRR18 ATF5 RPL29 EZR RIN2 MACF1 EPAS1 AGAP2 CYB5R3 EPB41L1 EPB41L2 MYO6 ST3GAL2 SPTBN1 PEA15A RDX GRIN2C PARP14 POU6F1 RPS26 GLUD1 PARVG ID4 RPS20 DZIP1 FERMT2 RPS24 CLIC4 HIP1 RPLP1 ARPC1B RPLP0 PYGM FMN2 BRCA1 TRIM8 JPH3 ACADL HIST2…
8092	cytoskeletal protein binding	5.7192e-27	1.6555e-24	46/443 10.3%	405/29994 1.3%	CYFIP1 HDAC5 MACF1 HIP1 WIPF1 ARPC1B MAST2 FMN2 ADD3 PPP1R9B LASP1 PDLIM2 EPB41L1 EPB41L2 KIF5B MYO6 PHACTR3 CTNNA1 FLNC WASF2 SPTBN1 TNS1 APC2 SVIL GSN DST HOMER2 LIMCH1 MTSS1L MSN MAPK8IP2 SPTB FMNL3 DIAPH1 FMNL2 DAAM1 APC PARVG DAAM2 PALLD DLG5 NF1 LCP1 UTRN EZR MYO1F
43228	non-membrane-bounded organelle	1.0155e-26	2.4872e-24	93/443 20.9%	1798/29994 5.9%	RPL4 WIPF1 FRMPD1 RPLP1 ARPC1B MAST2 RPLP0 CHD7 PYGM FMN2 BRCA1 RPL7 PPP1R9B EPS8 RPS15 RPS4X RPS14 LASP1 CASP8 RPS19 RPL18A RPS18 KIF5B RPS6KA1 KIF1C KIF1A BSN RPS10 CGNL1 CDK5RAP2 APC2 RPS9 DST RPS8 RPS5 DNMT3A ARAP3 RPSA ANK2 SPTB SIRT2 KIF4 APBB1IP KIFC2 PALLD PITPNM2 LCP1 RPL29 UTRN EZR DOCK2 SHANK3 HDAC5 MACF1 ADD3 UACA CENPB FGD2 TTN FGD6 PDLIM2 EPB41L1 EPB41L2 MYO6 RPS3 CTNNA1 RPS2 FLNC R…
43232	intracellular non-membrane-bounded organelle	1.0155e-26	2.4872e-24	93/443 20.9%	1798/29994 5.9%	RPL4 WIPF1 FRMPD1 RPLP1 ARPC1B MAST2 RPLP0 CHD7 PYGM FMN2 BRCA1 RPL7 PPP1R9B EPS8 RPS15 RPS4X RPS14 LASP1 CASP8 RPS19 RPL18A RPS18 KIF5B RPS6KA1 KIF1C KIF1A BSN RPS10 CGNL1 CDK5RAP2 APC2 RPS9 DST RPS8 RPS5 DNMT3A ARAP3 RPSA ANK2 SPTB SIRT2 KIF4 APBB1IP KIFC2 PALLD PITPNM2 LCP1 RPL29 UTRN EZR DOCK2 SHANK3 HDAC5 MACF1 ADD3 UACA CENPB FGD2 TTN FGD6 PDLIM2 EPB41L1 EPB41L2 MYO6 RPS3 CTNNA1 RPS2 FLNC R…
5886	plasma membrane	6.9377e-25	1.5778e-22	118/443 26.6%	2908/29994 9.6%	CYFIP1 KCNG4 NCF1 FRMPD1 CIB1 SLC4A2 LY6C1 AMOT EPS8 RIMS1 RIMS4 PALM KDR PLCE1 BSN TNS3 EPHB4 TNS1 TGM2 UNC13C CD93 SWAP70 PPP1R16A SCRIB PHKA1 RPSA ANK2 CLDN5 KCNQ4 LY6A UTRN EZR SHC4 CABP7 NOTCH4 LPAR1 PLD2 INPP5D MYO6 CDH22 KCNMB4 MBP SPTBN1 RASL10B TNK2 RDX MSN PHKB GRIN2C ARHGAP33 DIAPH1 SLC6A8 PARVG DLG5 AMOTL1 FERMT2 ROBO4 CLIC4 FLT1 GRIK5 MAST2 PPP1R9B PANX2 LASP1 JPH3 PSD4 MCF2L DLGAP3 …
3779	actin binding	1.7491e-24	3.7127e-22	37/443 8.3%	275/29994 0.9%	CYFIP1 HDAC5 MACF1 HIP1 WIPF1 ARPC1B FMN2 ADD3 PPP1R9B LASP1 EPB41L1 EPB41L2 MYO6 PHACTR3 CTNNA1 FLNC WASF2 SPTBN1 TNS1 SVIL GSN DST HOMER2 LIMCH1 MTSS1L MSN SPTB FMNL3 DIAPH1 FMNL2 DAAM1 PARVG DAAM2 PALLD LCP1 UTRN MYO1F
44444	cytoplasmic part	1.1099e-22	2.2086e-20	142/443 32.0%	4192/29994 13.9%	RPL4 CYFIP1 ALDH1L1 NCF1 WIPF1 PLEKHB1 ABAT CIB1 ALDH1L2 RPL7 AMOT RPS15 RPS14 RPS19 RPL18A RPS18 FTH1 KIF5B RPS6KA1 PLCE1 RPS10 CDK5RAP2 TNS1 TGM2 RPS9 CD93 RPS8 RPS5 PPP1R16A PHKA1 RPSA POLRMT AFG3L1 LARS2 PRR18 RPL29 UTRN EZR RIN2 EMID1 RTN2 MACF1 CABP7 AGAP2 RHOBTB3 AGAP1 AK3 FOXO4 ACACA PLD2 RASGRP3 CYB5R3 MOBP MYO6 ST3GAL2 SPTBN1 WDTC1 ZFHX3 IDH1 IDH2 PHKB BC026585 RPS26 GLUD1 FES BCL2 RPS2…
5856	cytoskeleton	7.4047e-21	1.3869e-18	65/443 14.6%	1137/29994 3.7%	WIPF1 FRMPD1 ARPC1B MAST2 FMN2 BRCA1 PPP1R9B EPS8 LASP1 KIF5B RPS6KA1 KIF1C KIF1A BSN CGNL1 CDK5RAP2 APC2 DST ARAP3 ANK2 SPTB SIRT2 KIF4 APBB1IP KIFC2 PALLD PITPNM2 LCP1 UTRN EZR DOCK2 SHANK3 HDAC5 MACF1 ADD3 UACA FGD2 TTN FGD6 PDLIM2 EPB41L1 EPB41L2 MYO6 CTNNA1 FLNC GAS2L1 WASF2 SPTBN1 PEA15A SVIL GSN MYO10 MSN SORBS1 GRIN2C PTPN13 GFAP FBXO31 DIAPH1 APC PARVG NF1 NES FERMT2 MYO1F
5198	structural molecule activity	7.9109e-20	1.3994e-17	36/443 8.1%	351/29994 1.1%	RPL4 RPLP1 RPLP0 ADD3 RPL7 TTN RPS15 RPS4X RPS14 AKAP13 MOBP RPS19 RPL18A EPB41L1 RPS18 EPB41L2 RPS3 CTNNA1 MBP RPS2 RPL18 RPS10 SPTBN1 RPS9 HOMER2 RPS5 RPSA ANK3 SPTB GFAP CLDN5 RPS20 NES RPS24 HCN2 SHANK1
22626	cytosolic ribosome	2.8791e-19	4.8248e-17	16/443 3.6%	41/29994 0.1%	RPS9 RPS8 RPS5 RPSA RPL7 RPS15 RPS26 RPS14 RPS19 RPS18 RPS3 RPS20 RPS2 RPL29 RPS10 RPS24
22627	cytosolic small ribosomal subunit	6.3672e-19	1.0137e-16	14/443 3.1%	28/29994 0.0%	RPS9 RPS8 RPS5 RPSA RPS15 RPS26 RPS14 RPS19 RPS18 RPS3 RPS20 RPS2 RPS10 RPS24
44237	cellular metabolic process	3.9825e-18	6.0382e-16	155/443 34.9%	5368/29994 17.8%	RPL4 ALDH1L1 NCF1 ZBTB20 ABAT UBE3B ALDH1L2 RPL7 RPS6KA4 RPS15 RPS14 RPS19 RPL18A SALL3 RPS18 EME2 RPS6KA1 KDR EPHB4 TGM2 RPS9 RPS5 SWAP70 ACOT11 HUS1 PHKA1 RPSA EBF4 VRK3 POLRMT EEF1A1 LARS2 RBP4 ATF5 RPL29 CSNK1G2 EPAS1 NOTCH4 MAZ AGAP2 LPAR1 AGAP1 AK3 FOXO4 TTBK1 ACACA PLD2 IRAK1 INPP5D ST3GAL2 SPTBN1 WDTC1 ZFHX3 YES1 TNK2 IDH1 IDH2 PHKB EEF2 PARP14 SMAD5 SCRT1 POU6F1 GLUD1 PTPRB WNK1 FES BCL2…
30054	cell junction	7.0057e-18	1.0139e-15	40/443 9.0%	505/29994 1.6%	SHC4 CYFIP1 AHNAK GRIK5 MAST2 CAMK2A ADD3 AMOT PPP1R9B PANX2 RIMS1 RIMS4 LASP1 CTNNA1 DLGAP3 BSN TNS3 CGNL1 TNS1 UNC13C DST ERBIN SCRIB HTR3A SORBS1 GRIN2C PARD3B APBB1IP CLDN5 APC PARVG SNPH DLG5 LCP1 AMOTL1 UTRN SHANK3 FERMT2 LIMS2 VAMP3
15935	small ribosomal subunit	1.2251e-17	1.696e-15	15/443 3.3%	41/29994 0.1%	RPS9 RPS8 RPS5 RPSA RPS15 RPS26 RPS4X RPS14 RPS19 RPS18 RPS3 RPS20 RPS2 RPS10 RPS24
8152	metabolic process	1.41e-17	1.8705e-15	174/443 39.2%	6468/29994 21.5%	RPL4 ALDH1L1 NCF1 ZBTB20 ABAT UBE3B ALDH1L2 RPL7 RPS6KA4 RPS15 RPS14 RPS19 RPL18A SALL3 RPS18 EME2 FTH1 KIF5B RPS6KA1 KDR PLCE1 PGLYRP1 EPHB4 TNS1 TGM2 RPS9 RPS5 SWAP70 ACOT11 HUS1 PHKA1 RPSA EBF4 VRK3 POLRMT AFG3L1 EEF1A1 LARS2 RBP4 ATF5 RPL29 CSNK1G2 EPAS1 NOTCH4 MAZ AGAP2 LPAR1 AGAP1 AK3 FOXO4 PLCXD1 TTBK1 ACACA PLD2 CYB5R3 IRAK1 INPP5D ST3GAL2 SPTBN1 WDTC1 ZFHX3 YES1 TNK2 IDH1 IDH2 PHKB EEF2 …
44459	plasma membrane part	2.437e-17	3.1038e-15	68/443 15.3%	1445/29994 4.8%	CYFIP1 ROBO4 KCNG4 FLT1 NCF1 GRIK5 MAST2 SLC4A2 LY6C1 AMOT PPP1R9B EPS8 PANX2 RIMS1 RIMS4 LASP1 KDR DLGAP3 BSN TNS3 CGNL1 EPHB4 TNS1 APC2 UNC13C VWF DST SLC32A1 GP1BB ANXA4 SCRIB HTR3A ANK2 PARD3B APBB1IP CLDN5 TMEM8 SNPH KCNQ4 LY6A LCP1 UTRN EZR SHANK3 VAMP3 SHC4 AHNAK CAMK2A ADD3 PLD2 GNG7 MYO6 GNA12 KISS1R CTNNA1 KCNMB4 ERBIN MSN SORBS1 GRIN2C SLC6A8 APC PARVG DLG5 PTPN6 AMOTL1 FERMT2 LIMS2
65007	biological regulation	2.6283e-17	3.1486e-15	185/443 41.7%	7124/29994 23.7%	CYFIP1 NCF1 FRMPD1 ZBTB20 ABAT AMOT RPS6KA4 RIMS1 RASSF2 SALL3 FTH1 RPS6KA1 PALM KDR PLCE1 PGLYRP1 TNS3 TNS1 TGM2 UNC13C KCNH3 HUS1 SCRIB ANK2 EBF4 VRK3 MAPK8IP2 CLDN5 RBP4 KCNQ4 ATF5 EZR RIN2 MACF1 TBC1D9B EPAS1 NOTCH4 MAZ AGAP2 LPAR1 AGAP1 FOXO4 ACACA PLD2 RASGRP3 CACNA1I IRAK1 EPB41L2 INPP5D MYO6 MBP TAC2 GAS2L1 SPTBN1 WDTC1 PEA15A ZFHX3 RASL10B IQSEC3 RASSF8 GRIN2C PARP14 SMAD5 SCRT1 POU6F1 F…
44238	primary metabolic process	2.67e-17	3.1486e-15	157/443 35.4%	5584/29994 18.6%	RPL4 NCF1 ZBTB20 ABAT UBE3B RPL7 RPS6KA4 RPS15 RPS14 RPS19 RPL18A SALL3 RPS18 EME2 RPS6KA1 KDR PLCE1 PGLYRP1 EPHB4 TNS1 TGM2 RPS9 RPS5 SWAP70 ACOT11 HUS1 PHKA1 RPSA EBF4 VRK3 POLRMT AFG3L1 EEF1A1 LARS2 RBP4 ATF5 RPL29 CSNK1G2 EPAS1 NOTCH4 MAZ AGAP2 LPAR1 AGAP1 AK3 FOXO4 PLCXD1 TTBK1 ACACA PLD2 CYB5R3 IRAK1 ST3GAL2 SPTBN1 WDTC1 ZFHX3 YES1 TNK2 IDH1 IDH2 PHKB EEF2 PARP14 SMAD5 SCRT1 POU6F1 GLUD1 PT…
44267	cellular protein metabolic process	7.5036e-17	8.5327e-15	73/443 16.4%	1671/29994 5.5%	RPL4 ACVRL1 FLT1 ST6GALNAC2 RPLP1 MAST2 RPLP0 AATK UBE3B RPL7 RPS6KA4 RPS15 RPS4X RPS14 RPS19 RPL18A RPS18 RPS6KA1 KDR SPEG EPHB4 TGM2 APC2 RPS9 RPS5 AKTIP HUS1 PHKA1 RPSA VRK3 SIRT2 EEF1A1 EEF1G LARS2 EEF1D RPL29 CSNK1G2 ST6GALNAC6 HDAC5 CAMK2A LPAR1 TTBK1 TRAK2 IRAK1 RPS3 KISS1R PAK6 RPS2 RPL18 ST3GAL2 SPTBN1 MAP4K4 RANBP2 YES1 TNK2 CDC42BPG VEGFB HUWE1 EEF2 PTPN13 SMAD5 PSMB8 HIPK2 PTPRB SBK1 …
44422	organelle part	1.1986e-16	1.316e-14	97/443 21.8%	2701/29994 9.0%	RPL4 WIPF1 PLEKHB1 CIB1 RPL7 EPS8 RPS15 RPS14 RPS19 RPS18 KIF5B RPS6KA1 RPS10 CDK5RAP2 RPS9 RPS8 RPS5 RPSA LEMD2 ATF5 UTRN EZR EPAS1 AK3 CYB5R3 MYO6 ST3GAL2 SPTBN1 PEA15A ZFHX3 RDX IDH2 GRIN2C SMAD5 GFAP RPS26 GLUD1 NF1 BCL2 RPS20 NES BCL2L2 RPS24 ST6GALNAC2 ARPC1B CHD7 PYGM ETFB BRCA1 PPP1R9B RPS4X LASP1 CASP8 ACADL CPT2 KIF1C HMGCS2 KIF1A ACADM CGNL1 APC2 DST DNMT3A OLIG1 SPTB SIRT2 KIF4 MED25 …
30695	GTPase regulator activity	1.2658e-16	1.3434e-14	32/443 7.2%	341/29994 1.1%	ARHGAP9 TBC1D9B DOCK8 AGAP2 AGAP1 FGD2 RASGRP3 RIMS1 FGD6 ALS2CL CYTH4 PSD4 MCF2L PLCE1 APPL2 MAP4K4 PSD CDC42BPG IQSEC3 DAB2IP ARHGEF19 ARAP3 ARAP1 VAV1 ARHGAP33 SGSM2 RAPGEF1 NF1 RGL3 RGS12 DOCK2 RIN2
32991	macromolecular complex	1.598e-16	1.6413e-14	92/443 20.7%	2491/29994 8.3%	RPL4 CYFIP1 ALDH1L1 CLIC4 KCNG4 NCF1 WIPF1 RPLP1 ARPC1B GRIK5 RPLP0 CHD7 ETFB BRCA1 RPL7 EPS8 RPS15 RPS4X RPS14 HK3 CASP8 RPS19 RPL18A RPS18 KIF5B RPS6KA1 KIF1C KIF1A RPS10 CGNL1 APC2 RPS9 DST RPS8 RPS5 RPL13A PHKA1 RPSA OLIG1 MAPK8IP2 SIRT2 KIF4 EEF1G MED25 KIFC2 EEF1D PALLD KCNQ4 LCP1 PABPC1 ATF5 RPL29 UTRN VAMP3 YAP1 HDAC5 LAMA5 EPAS1 CAMK2A ADCY4 UACA TTN RASGRP3 PCBP4 GNG7 MYO6 GNA12 RPS3 KC…
44446	intracellular organelle part	1.6519e-16	1.6437e-14	95/443 21.4%	2625/29994 8.7%	RPL4 ST6GALNAC2 WIPF1 ARPC1B PLEKHB1 CHD7 CIB1 ETFB BRCA1 RPL7 PPP1R9B EPS8 RPS15 RPS4X RPS14 LASP1 CASP8 RPS19 ACADL CPT2 RPS18 KIF5B RPS6KA1 KIF1C HMGCS2 KIF1A ACADM RPS10 CGNL1 CDK5RAP2 APC2 RPS9 DST RPS8 RPS5 DNMT3A RPSA OLIG1 LEMD2 SPTB SIRT2 KIF4 MED25 ALDH5A1 KIFC2 VGF PALLD LCP1 PABPC1 ATF5 TKT UTRN EZR SHANK3 ST6GALNAC6 YAP1 HDAC5 PCX EPAS1 AK3 ADD3 UACA CENPB TTN CYB5R3 CUX1 OS9 MYO6 RP…
60589	nucleoside-triphosphatase regulator activity	2.277e-16	2.1969e-14	32/443 7.2%	348/29994 1.1%	ARHGAP9 TBC1D9B DOCK8 AGAP2 AGAP1 FGD2 RASGRP3 RIMS1 FGD6 ALS2CL CYTH4 PSD4 MCF2L PLCE1 APPL2 MAP4K4 PSD CDC42BPG IQSEC3 DAB2IP ARHGEF19 ARAP3 ARAP1 VAV1 ARHGAP33 SGSM2 RAPGEF1 NF1 RGL3 RGS12 DOCK2 RIN2
33279	ribosomal subunit	2.7843e-16	2.6074e-14	17/443 3.8%	71/29994 0.2%	RPL4 RPS9 RPS8 RPS5 RPSA RPL7 RPS15 RPS26 RPS4X RPS14 RPS19 RPS18 RPS3 RPS20 RPS2 RPS10 RPS24
50794	regulation of cellular process	1.2747e-15	1.139e-13	167/443 37.6%	6372/29994 21.2%	CYFIP1 FRMPD1 ZBTB20 AMOT RPS6KA4 RIMS1 RASSF2 SALL3 FTH1 RPS6KA1 PALM KDR PLCE1 PGLYRP1 TNS3 TNS1 TGM2 UNC13C KCNH3 HUS1 ANK2 EBF4 VRK3 MAPK8IP2 RBP4 KCNQ4 ATF5 EZR RIN2 MACF1 TBC1D9B EPAS1 NOTCH4 MAZ AGAP2 LPAR1 AGAP1 FOXO4 PLD2 RASGRP3 CACNA1I IRAK1 EPB41L2 INPP5D MYO6 MBP GAS2L1 SPTBN1 WDTC1 PEA15A ZFHX3 RASL10B IQSEC3 RASSF8 GRIN2C PARP14 SMAD5 SCRT1 POU6F1 FBXO31 ARHGAP33 GLUD1 WNK1 NF1 BCL…
3735	structural constituent of ribosome	1.2878e-15	1.139e-13	19/443 4.2%	105/29994 0.3%	RPL4 RPS9 RPLP1 RPS5 RPLP0 RPSA RPL7 RPS15 RPS4X RPS14 RPS19 RPL18A RPS18 RPS3 RPS20 RPS2 RPL18 RPS10 RPS24
50789	regulation of biological process	2.4811e-15	2.1351e-13	172/443 38.8%	6697/29994 22.3%	CYFIP1 NCF1 FRMPD1 ZBTB20 AMOT RPS6KA4 RIMS1 RASSF2 SALL3 FTH1 RPS6KA1 PALM KDR PLCE1 PGLYRP1 TNS3 TNS1 TGM2 UNC13C KCNH3 HUS1 ANK2 EBF4 VRK3 MAPK8IP2 RBP4 KCNQ4 ATF5 EZR RIN2 MACF1 TBC1D9B EPAS1 NOTCH4 MAZ AGAP2 LPAR1 AGAP1 FOXO4 PLD2 RASGRP3 CACNA1I IRAK1 EPB41L2 INPP5D MYO6 MBP GAS2L1 SPTBN1 WDTC1 PEA15A ZFHX3 RASL10B IQSEC3 RASSF8 GRIN2C PARP14 SMAD5 SCRT1 POU6F1 FBXO31 ARHGAP33 GLUD1 WNK1 NF…
65009	regulation of molecular function	5.6603e-15	4.7428e-13	48/443 10.8%	871/29994 2.9%	ARHGAP9 FLT1 TBC1D9B HIP1 AGAP2 ADCY4 LPAR1 AGAP1 MLLT1 ADCY1 UACA ADCY5 RASGRP3 AKAP13 CACNA1I ALS2CL IRAK1 MCF2L GNG7 PALM KISS1R APPL2 WDTC1 TNS1 TGM2 EDN1 LYNX1 ANXA3 AKTIP ARAP3 CFLAR ARAP1 VRK3 MAPK8IP2 RENBP VAV1 HIPK2 FBXO31 ARHGAP33 WNK1 SGSM2 RAPGEF1 NF1 BCL2 PTPN6 RGL3 RGS12 DOCK2
42995	cell projection	7.3337e-15	5.9873e-13	48/443 10.8%	877/29994 2.9%	ACVRL1 CYFIP1 PYGB NCF1 GRIK5 PLEKHB1 CAMK2A ADCY4 LPAR1 CIB1 FGD2 AMOT PLD2 PPP1R9B DDN SH3PXD2A KIF5B MCF2L MYO6 GNA12 RPS3 KDR CTNNA1 MBP DLGAP3 WASF2 SVIL GSN ANXA3 SWAP70 TNK2 RDX MSN ARAP3 HTR3A ANK3 ADRA2C APBB1IP DIAPH1 APC VGF PALLD NF1 KCNQ4 LCP1 UTRN EZR HCN2
50790	regulation of catalytic activity	7.7204e-15	6.1455e-13	44/443 9.9%	746/29994 2.4%	ARHGAP9 FLT1 TBC1D9B HIP1 AGAP2 ADCY4 LPAR1 AGAP1 MLLT1 ADCY1 UACA ADCY5 RASGRP3 AKAP13 ALS2CL IRAK1 MCF2L GNG7 PALM KISS1R APPL2 WDTC1 TNS1 TGM2 EDN1 ANXA3 ARAP3 CFLAR ARAP1 VRK3 MAPK8IP2 RENBP VAV1 FBXO31 ARHGAP33 WNK1 SGSM2 RAPGEF1 NF1 BCL2 PTPN6 RGL3 RGS12 DOCK2
5840	ribosome	1.1532e-14	8.9557e-13	23/443 5.1%	190/29994 0.6%	RPL4 RPS9 RPS8 RPLP1 RPS5 RPLP0 RPSA RPL7 RPS15 RPS26 RPS4X RPS14 RPS19 RPL18A RPS18 RPS6KA1 RPS3 RPS20 RPS2 RPL29 RPL18 RPS10 RPS24
16020	membrane	1.4196e-14	1.0743e-12	182/443 41.0%	7393/29994 24.6%	CYFIP1 KCNG4 NCF1 FRMPD1 PLEKHB1 CIB1 SLC4A2 LY6C1 AMOT EPS8 RIMS1 RIMS4 PALM KDR PLCE1 BSN TNS3 EPHB4 TNS1 TGM2 UNC13C KCNH3 SEMA6C CD93 SWAP70 PPP1R16A SCRIB PHKA1 RPSA ANK2 LEMD2 AFG3L1 CLDN5 KCNQ4 LY6A UTRN EZR SHC4 SLC45A4 RTN2 TBC1D9B CABP7 NOTCH4 LPAR1 PLD2 CYB5R3 EPB41L1 EPB41L2 INPP5D MYO6 CDH22 KCNMB4 MBP ST3GAL2 SPTBN1 RASL10B TNK2 RDX IDH2 MSN PHKB GRIN2C ARHGAP33 GLUD1 DIAPH1 PTPRB S…
16043	cellular component organization	1.4509e-14	1.0743e-12	76/443 17.1%	1976/29994 6.5%	ACVRL1 CYFIP1 HIP1 WIPF1 GRIK5 CHD7 FMN2 BRCA1 PPP1R9B EPS8 RPS15 RPS14 CASP8 ACADL KIF5B PALM KDR ACADM RPS10 ACADS TNS1 TGM2 APC2 SEMA6C DST LIMCH1 DNMT3A SCRIB ANK3 ETV4 SIRT2 VAV1 EPN1 DAAM1 DAAM2 SNPH PALLD VWA1 LCP1 UTRN DOCK2 RIN2 SHANK3 VAMP3 HDAC5 LAMA5 EPAS1 NOTCH4 AGAP2 LPAR1 ADCY1 TTN PLD2 NEURL1A ALS2CL EPB41L1 EPB41L2 MYO6 CTNNA1 RPS2 WASF2 SVIL GSN RDX MTSS1L SORBS1 FBXO31 FMNL3 DI…
5083	small GTPase regulator activity	1.5384e-14	1.1133e-12	24/443 5.4%	213/29994 0.7%	PSD TBC1D9B CDC42BPG IQSEC3 AGAP2 ARHGEF19 AGAP1 ARAP3 ARAP1 VAV1 FGD2 RASGRP3 ARHGAP33 RIMS1 FGD6 ALS2CL CYTH4 PSD4 MCF2L SGSM2 RGL3 DOCK2 APPL2 MAP4K4
166	nucleotide binding	2.722e-14	1.926e-12	77/443 17.3%	2043/29994 6.8%	ACVRL1 FLT1 MAST2 DOCK8 CHD7 AATK PYGM OPLAH HK2 RPS6KA4 HK3 ACADL KIF5B RPS6KA1 KDR KIF1C SPEG AOX1 KIF1A ACADM ACADS EPHB4 TGM2 SWAP70 VRK3 RHOC RENBP SIRT2 KIF4 AFG3L1 EEF1A1 LARS2 RBP4 ALDH5A1 KIFC2 PABPC1 DOCK2 CSNK1G2 MVK PCX CAMK2A AGAP2 ADCY4 RHOBTB3 AGAP1 AK3 ADCY1 TTBK1 ACACA ADCY5 RBM15B CYB5R3 RNF213 IRAK1 MYO6 GNA12 PAK6 MAP4K4 YES1 MYO10 RASL10B TNK2 CDC42BPG IDH1 IDH2 EEF2 HIPK2 GL…
7010	cytoskeleton organization	5.4323e-14	3.7601e-12	27/443 6.0%	294/29994 0.9%	WIPF1 AGAP2 FMN2 BRCA1 TTN PPP1R9B EPS8 NEURL1A EPB41L1 EPB41L2 PALM WASF2 SVIL GSN DST LIMCH1 SORBS1 FBXO31 FMNL3 DIAPH1 FMNL2 DAAM1 DAAM2 NF1 BCL2 LCP1 DOCK2
44260	cellular macromolecule metabolic process	1.2551e-13	8.5028e-12	115/443 25.9%	3900/29994 13.0%	RPL4 ZBTB20 UBE3B RPL7 RPS6KA4 RPS15 RPS14 RPS19 RPL18A SALL3 RPS18 EME2 RPS6KA1 KDR EPHB4 TGM2 RPS9 RPS5 SWAP70 HUS1 PHKA1 RPSA EBF4 VRK3 POLRMT EEF1A1 LARS2 RBP4 ATF5 RPL29 CSNK1G2 EPAS1 NOTCH4 MAZ LPAR1 FOXO4 TTBK1 PLD2 IRAK1 ST3GAL2 SPTBN1 ZFHX3 YES1 TNK2 PHKB EEF2 PARP14 SMAD5 SCRT1 POU6F1 PTPRB WNK1 FES BCL2 MAP3K10 RPS20 RPS24 CDK16 MXD4 ACVRL1 PYGB ZFP523 FLT1 ST6GALNAC2 HIP1 RPLP1 GRIK5 …
30029	actin filament-based process	1.58e-13	1.0481e-11	21/443 4.7%	173/29994 0.5%	GSN WIPF1 LIMCH1 AGAP2 FMN2 SORBS1 TTN PPP1R9B EPS8 FMNL3 DIAPH1 FMNL2 DAAM1 DAAM2 EPB41L1 EPB41L2 NF1 BCL2 FLNC LCP1 WASF2
17076	purine nucleotide binding	1.7633e-13	1.1458e-11	69/443 15.5%	1775/29994 5.9%	ACVRL1 FLT1 MAST2 DOCK8 CHD7 AATK PYGM OPLAH HK2 RPS6KA4 HK3 ACADL KIF5B RPS6KA1 KDR KIF1C SPEG AOX1 KIF1A ACADM ACADS EPHB4 TGM2 SWAP70 VRK3 RHOC RENBP KIF4 AFG3L1 EEF1A1 LARS2 KIFC2 DOCK2 CSNK1G2 MVK PCX CAMK2A AGAP2 ADCY4 RHOBTB3 AGAP1 AK3 ADCY1 TTBK1 ACACA ADCY5 CYB5R3 RNF213 IRAK1 MYO6 GNA12 PAK6 MAP4K4 YES1 MYO10 RASL10B TNK2 CDC42BPG EEF2 HIPK2 GLUD1 SBK1 WNK1 FES MAP3K10 ATP13A2 MYO1F HCN…
44445	cytosolic part	2.1455e-13	1.3663e-11	16/443 3.6%	88/29994 0.2%	RPS9 RPS8 RPS5 RPSA UACA RPL7 RPS15 RPS26 RPS14 RPS19 RPS18 RPS3 RPS20 RPS2 RPS10 RPS24
30234	enzyme regulator activity	2.2111e-13	1.3804e-11	39/443 8.8%	656/29994 2.1%	ARHGAP9 TBC1D9B DOCK8 AGAP2 AGAP1 FGD2 RASGRP3 RIMS1 FGD6 ALS2CL CYTH4 PSD4 MCF2L PLCE1 APPL2 WDTC1 TNS1 MAP4K4 PSD ANXA3 CDC42BPG IQSEC3 DAB2IP ARHGEF19 ARAP3 ARAP1 MAPK8IP2 RENBP VAV1 ARHGAP33 WNK1 COL7A1 SGSM2 RAPGEF1 NF1 RGL3 RGS12 DOCK2 RIN2
19538	protein metabolic process	2.6223e-13	1.6057e-11	77/443 17.3%	2135/29994 7.1%	RPL4 ACVRL1 FLT1 ST6GALNAC2 RPLP1 MAST2 RPLP0 AATK UBE3B RPL7 RPS6KA4 RPS15 RPS4X RPS14 CASP8 RPS19 RPL18A RPS18 RPS6KA1 KDR SPEG EPHB4 TNS1 TGM2 APC2 RPS9 RPS5 AKTIP HUS1 PHKA1 RPSA VRK3 SIRT2 AFG3L1 EEF1A1 EEF1G LARS2 EEF1D RPL29 CSNK1G2 ST6GALNAC6 HDAC5 CAMK2A LPAR1 TTBK1 ACACA TRAK2 IRAK1 RPS3 KISS1R PAK6 RPS2 RPL18 ST3GAL2 SPTBN1 MAP4K4 RANBP2 YES1 TNK2 CDC42BPG VEGFB HUWE1 EEF2 PTPN13 SMAD5…
30036	actin cytoskeleton organization	4.9056e-13	2.9471e-11	20/443 4.5%	163/29994 0.5%	GSN WIPF1 LIMCH1 AGAP2 FMN2 SORBS1 TTN PPP1R9B EPS8 FMNL3 DIAPH1 FMNL2 DAAM1 DAAM2 EPB41L1 EPB41L2 NF1 BCL2 LCP1 WASF2
32502	developmental process	5.5106e-13	3.2492e-11	92/443 20.7%	2855/29994 9.5%	ACVRL1 CYFIP1 ROBO4 CLIC4 FLT1 HIP1 MAST2 CHD7 FMN2 BRCA1 AMOT PPP1R9B CASP8 SALL3 KDR SPEG ACADM TNS3 TGM2 APC2 SEMA6C AMN EDN1 VWF DST METRN ANXA4 SWAP70 DNMT3A HUS1 SCRIB OLIG1 EBF4 ANK3 ETV4 VAV1 ITPKB CLDN5 RBP4 TUBB2B ALDH5A1 VGF PALLD RAPGEF1 HCLS1 KCNQ4 ATF5 PPARA UTRN DOCK2 SHANK3 ENG HDAC5 MACF1 LAMA5 ZFP423 EPAS1 NXN NOTCH4 LPAR1 CXCR5 ADCY1 FOXO4 TTN PLD2 NEURL1A CUX1 INPP5D MYO6 GNA1…
15629	actin cytoskeleton	6.6524e-13	3.8511e-11	21/443 4.7%	186/29994 0.6%	MACF1 DST MYO10 WIPF1 ARPC1B FMN2 SORBS1 SPTB TTN PPP1R9B LASP1 PALLD EPB41L2 MYO6 CTNNA1 FLNC LCP1 UTRN CGNL1 MYO1F SPTBN1
23034	intracellular signaling pathway	9.2009e-13	5.2313e-11	45/443 10.1%	892/29994 2.9%	SHC4 SHC3 FLT1 AGAP2 ADCY4 LPAR1 AGAP1 ADCY1 FOXO4 BRCA1 PLCXD1 UACA ADCY5 RASGRP3 RPS6KA4 IRAK1 INPP5D MCF2L RPS6KA1 GNA12 KISS1R PLCE1 WASF2 PEA15A MAP4K4 TGM2 UNC13C EDN1 GSN RASL10B CDC42BPG ACOT11 HUS1 MAPK8IP2 RHOC VAV1 HIPK2 ITPKB WNK1 NF1 PTPN6 RGL3 PLCD3 CNIH2 SHANK3
30554	adenyl nucleotide binding	1.2337e-12	6.8917e-11	60/443 13.5%	1474/29994 4.9%	ACVRL1 FLT1 MAST2 CHD7 AATK PYGM OPLAH HK2 RPS6KA4 HK3 ACADL KIF5B RPS6KA1 KDR KIF1C SPEG AOX1 KIF1A ACADM ACADS EPHB4 SWAP70 VRK3 RENBP KIF4 AFG3L1 LARS2 KIFC2 CSNK1G2 MVK PCX CAMK2A AGAP2 ADCY4 RHOBTB3 AK3 ADCY1 TTBK1 ACACA ADCY5 CYB5R3 RNF213 IRAK1 MYO6 PAK6 MAP4K4 YES1 MYO10 TNK2 CDC42BPG HIPK2 GLUD1 SBK1 WNK1 FES MAP3K10 ATP13A2 MYO1F HCN2 CDK16
6412	translation	1.4792e-12	8.1203e-11	24/443 5.4%	262/29994 0.8%	RPL4 RPS9 RPLP1 RPS5 RPLP0 RPSA EEF2 RPL7 RPS15 EEF1A1 RPS4X EEF1G LARS2 RPS14 RPS19 RPL18A RPS18 EEF1D RPS3 RPS20 RPS2 RPL29 RPL18 RPS24
32555	purine ribonucleotide binding	2.1532e-12	1.1607e-10	65/443 14.6%	1702/29994 5.6%	ACVRL1 FLT1 MAST2 DOCK8 CHD7 AATK PYGM OPLAH HK2 RPS6KA4 HK3 KIF5B RPS6KA1 KDR KIF1C SPEG KIF1A EPHB4 TGM2 SWAP70 VRK3 RHOC RENBP KIF4 AFG3L1 EEF1A1 LARS2 KIFC2 DOCK2 CSNK1G2 MVK PCX CAMK2A AGAP2 ADCY4 RHOBTB3 AGAP1 AK3 ADCY1 TTBK1 ACACA ADCY5 CYB5R3 RNF213 IRAK1 MYO6 GNA12 PAK6 MAP4K4 YES1 MYO10 RASL10B TNK2 CDC42BPG EEF2 HIPK2 GLUD1 SBK1 WNK1 FES MAP3K10 ATP13A2 MYO1F HCN2 CDK16
32553	ribonucleotide binding	2.2094e-12	1.1607e-10	65/443 14.6%	1703/29994 5.6%	ACVRL1 FLT1 MAST2 DOCK8 CHD7 AATK PYGM OPLAH HK2 RPS6KA4 HK3 KIF5B RPS6KA1 KDR KIF1C SPEG KIF1A EPHB4 TGM2 SWAP70 VRK3 RHOC RENBP KIF4 AFG3L1 EEF1A1 LARS2 KIFC2 DOCK2 CSNK1G2 MVK PCX CAMK2A AGAP2 ADCY4 RHOBTB3 AGAP1 AK3 ADCY1 TTBK1 ACACA ADCY5 CYB5R3 RNF213 IRAK1 MYO6 GNA12 PAK6 MAP4K4 YES1 MYO10 RASL10B TNK2 CDC42BPG EEF2 HIPK2 GLUD1 SBK1 WNK1 FES MAP3K10 ATP13A2 MYO1F HCN2 CDK16
1883	purine nucleoside binding	2.2237e-12	1.1607e-10	60/443 13.5%	1495/29994 4.9%	ACVRL1 FLT1 MAST2 CHD7 AATK PYGM OPLAH HK2 RPS6KA4 HK3 ACADL KIF5B RPS6KA1 KDR KIF1C SPEG AOX1 KIF1A ACADM ACADS EPHB4 SWAP70 VRK3 RENBP KIF4 AFG3L1 LARS2 KIFC2 CSNK1G2 MVK PCX CAMK2A AGAP2 ADCY4 RHOBTB3 AK3 ADCY1 TTBK1 ACACA ADCY5 CYB5R3 RNF213 IRAK1 MYO6 PAK6 MAP4K4 YES1 MYO10 TNK2 CDC42BPG HIPK2 GLUD1 SBK1 WNK1 FES MAP3K10 ATP13A2 MYO1F HCN2 CDK16
1882	nucleoside binding	2.6253e-12	1.3482e-10	60/443 13.5%	1501/29994 5.0%	ACVRL1 FLT1 MAST2 CHD7 AATK PYGM OPLAH HK2 RPS6KA4 HK3 ACADL KIF5B RPS6KA1 KDR KIF1C SPEG AOX1 KIF1A ACADM ACADS EPHB4 SWAP70 VRK3 RENBP KIF4 AFG3L1 LARS2 KIFC2 CSNK1G2 MVK PCX CAMK2A AGAP2 ADCY4 RHOBTB3 AK3 ADCY1 TTBK1 ACACA ADCY5 CYB5R3 RNF213 IRAK1 MYO6 PAK6 MAP4K4 YES1 MYO10 TNK2 CDC42BPG HIPK2 GLUD1 SBK1 WNK1 FES MAP3K10 ATP13A2 MYO1F HCN2 CDK16
51056	regulation of small GTPase mediated signal transduction	3.0309e-12	1.5318e-10	21/443 4.7%	201/29994 0.6%	PSD TBC1D9B IQSEC3 AGAP2 DAB2IP LPAR1 ARHGEF19 AGAP1 ARAP3 ARAP1 FGD2 ITPKB FGD6 ALS2CL CYTH4 PSD4 MCF2L SGSM2 NF1 RGL3 DOCK2
7275	multicellular organismal development	3.1966e-12	1.5903e-10	86/443 19.4%	2660/29994 8.8%	ACVRL1 CYFIP1 ROBO4 CLIC4 FLT1 CHD7 FMN2 BRCA1 AMOT PPP1R9B CASP8 SALL3 KDR ACADM TNS3 TGM2 APC2 SEMA6C AMN EDN1 VWF DST METRN ANXA4 SWAP70 DNMT3A HUS1 SCRIB OLIG1 EBF4 ANK3 ETV4 VAV1 ITPKB CLDN5 RBP4 TUBB2B ALDH5A1 VGF PALLD RAPGEF1 HCLS1 KCNQ4 ATF5 PPARA UTRN DOCK2 SHANK3 ENG HDAC5 MACF1 LAMA5 ZFP423 EPAS1 NXN NOTCH4 LPAR1 CXCR5 ADCY1 FOXO4 TTN PLD2 NEURL1A CUX1 INPP5D MYO6 GNA12 CTNNA1 MBP WAS…
3824	catalytic activity	4.7876e-12	2.3452e-10	129/443 29.1%	4857/29994 16.1%	ALDH1L1 NCF1 ABAT UBE3B ALDH1L2 RPS6KA4 EME2 FTH1 KIF5B RPS6KA1 KDR PLCE1 PGLYRP1 EPHB4 TNS1 TGM2 KCNH3 ACOT11 HUS1 PHKA1 VRK3 POLRMT MAPK8IP2 4931406C07RIK AFG3L1 EEF1A1 LARS2 RBP4 CSNK1G2 AGAP2 RHOBTB3 AGAP1 AK3 PLCXD1 TTBK1 ACACA PLD2 CYB5R3 IRAK1 INPP5D MYO6 ST3GAL2 CTLA2A YES1 TNK2 IDH1 IDH2 PHKB EEF2 PARP14 BC026585 GLUD1 PTPRB WNK1 FES MAP3K10 CDK16 ACVRL1 B4GALT2 PYGB FLT1 ST6GALNAC2 MAST…
43170	macromolecule metabolic process	6.4222e-12	3.0982e-10	120/443 27.0%	4399/29994 14.6%	RPL4 ZBTB20 UBE3B RPL7 RPS6KA4 RPS15 RPS14 RPS19 RPL18A SALL3 RPS18 EME2 RPS6KA1 KDR PGLYRP1 EPHB4 TNS1 TGM2 RPS9 RPS5 SWAP70 HUS1 PHKA1 RPSA EBF4 VRK3 POLRMT AFG3L1 EEF1A1 LARS2 RBP4 ATF5 RPL29 CSNK1G2 EPAS1 NOTCH4 MAZ LPAR1 FOXO4 TTBK1 ACACA PLD2 IRAK1 ST3GAL2 SPTBN1 ZFHX3 YES1 TNK2 PHKB EEF2 PARP14 SMAD5 SCRT1 POU6F1 PTPRB WNK1 FES BCL2 MAP3K10 RPS20 RPS24 CDK16 MXD4 ACVRL1 PYGB ZFP523 FLT1 ST…
46578	regulation of Ras protein signal transduction	8.1634e-12	3.8794e-10	19/443 4.2%	168/29994 0.5%	PSD TBC1D9B IQSEC3 AGAP2 LPAR1 ARHGEF19 AGAP1 ARAP3 ARAP1 FGD2 ITPKB FGD6 ALS2CL CYTH4 PSD4 MCF2L SGSM2 NF1 DOCK2
10646	regulation of cell communication	8.6004e-12	4.027e-10	43/443 9.7%	880/29994 2.9%	TBC1D9B GRIK5 CAMK2A AGAP2 LPAR1 AGAP1 FGD2 PLD2 RIMS1 FGD6 ALS2CL CYTH4 IRAK1 PSD4 INPP5D MCF2L MYO6 KDR KISS1R CTNNA1 TGM2 PSD EDN1 LYNX1 IQSEC3 DAB2IP ARHGEF19 ARAP3 ARAP1 GRIN2C VRK3 MAPK8IP2 ITPKB GLUD1 APC VGF SGSM2 NF1 HCLS1 KCNQ4 PTPN6 RGL3 DOCK2
32559	adenyl ribonucleotide binding	1.5332e-11	7.0749e-10	56/443 12.6%	1401/29994 4.6%	ACVRL1 FLT1 MAST2 CHD7 AATK PYGM OPLAH HK2 RPS6KA4 HK3 KIF5B RPS6KA1 KDR KIF1C SPEG KIF1A EPHB4 SWAP70 VRK3 RENBP KIF4 AFG3L1 LARS2 KIFC2 CSNK1G2 MVK PCX CAMK2A AGAP2 ADCY4 RHOBTB3 AK3 ADCY1 TTBK1 ACACA ADCY5 CYB5R3 RNF213 IRAK1 MYO6 PAK6 MAP4K4 YES1 MYO10 TNK2 CDC42BPG HIPK2 GLUD1 SBK1 WNK1 FES MAP3K10 ATP13A2 MYO1F HCN2 CDK16
30529	ribonucleoprotein complex	1.6418e-11	7.4677e-10	29/443 6.5%	432/29994 1.4%	RPL4 RPLP1 RPLP0 BRCA1 RPL7 RPS15 RPS4X RPS14 CASP8 RPS19 RPL18A RPS18 PCBP4 RPS6KA1 RPS3 RPS2 RPL18 RPS10 RPS9 RPS8 RPS5 RPL13A RPSA EEF2 RPS26 RPS20 PABPC1 RPL29 RPS24
9966	regulation of signal transduction	1.7121e-11	7.6781e-10	32/443 7.2%	524/29994 1.7%	TBC1D9B AGAP2 LPAR1 AGAP1 FGD2 PLD2 FGD6 ALS2CL CYTH4 IRAK1 PSD4 INPP5D MCF2L KDR TGM2 PSD LYNX1 IQSEC3 DAB2IP ARHGEF19 ARAP3 ARAP1 VRK3 MAPK8IP2 ITPKB APC SGSM2 NF1 HCLS1 PTPN6 RGL3 DOCK2
51179	localization	1.8827e-11	8.3258e-10	84/443 18.9%	2656/29994 8.8%	GLTP CLIC4 KCNG4 FLT1 HIP1 WIPF1 GRIK5 SLC4A2 FMN2 ETFB RLBP1 AMOT PANX2 RIMS1 AKAP13 RIMS4 LASP1 CPT2 FTH1 KIF5B PALM KDR KIF1C TNS3 TNS1 UNC13C KCNH3 AMN EDN1 DST SLC32A1 AKTIP SCRIB HTR3A ANK2 VAV1 EPN1 RBP4 TUBB2B VGF SNPH PITPNM2 KCNQ4 DOCK2 RIN2 VAMP3 SLC45A4 MACF1 LAMA5 CAMK2A AGAP2 RHOBTB3 AGAP1 TRAK2 PLD2 NEURL1A CACNA1I ALS2CL CUX1 MYO6 KISS1R KCNMB4 WASF2 CACNG4 SPTBN1 PEA15A RANBP2 GS…
48731	system development	2.1435e-11	9.3493e-10	73/443 16.4%	2151/29994 7.1%	ACVRL1 CYFIP1 ROBO4 CLIC4 FLT1 CHD7 AMOT PPP1R9B CASP8 SALL3 KDR ACADM TNS3 TGM2 APC2 SEMA6C EDN1 VWF DST METRN ANXA4 SWAP70 SCRIB OLIG1 ANK3 ETV4 VAV1 ITPKB CLDN5 RBP4 TUBB2B VGF PALLD RAPGEF1 HCLS1 KCNQ4 ATF5 PPARA UTRN DOCK2 SHANK3 ENG HDAC5 MACF1 LAMA5 ZFP423 EPAS1 NOTCH4 LPAR1 CXCR5 ADCY1 FOXO4 TTN PLD2 NEURL1A CUX1 MYO6 CTNNA1 MBP WASF2 ZFHX3 VEGFB SMAD5 PTPRB APC SST NFIC NF1 BCL2 ID4 PLCD…
23051	regulation of signaling process	2.2984e-11	9.8893e-10	32/443 7.2%	530/29994 1.7%	TBC1D9B AGAP2 LPAR1 AGAP1 FGD2 PLD2 FGD6 ALS2CL CYTH4 IRAK1 PSD4 INPP5D MCF2L KDR TGM2 PSD LYNX1 IQSEC3 DAB2IP ARHGEF19 ARAP3 ARAP1 VRK3 MAPK8IP2 ITPKB APC SGSM2 NF1 HCLS1 PTPN6 RGL3 DOCK2
19899	enzyme binding	3.104e-11	1.3177e-09	27/443 6.0%	385/29994 1.2%	DOCK8 AGAP2 ADD3 PLD2 RASGRP3 RIMS1 AKAP13 HK3 ALS2CL PLCE1 APPL2 CDK5RAP2 WDTC1 PEA15A APC2 VWF SORBS1 VRK3 FMNL3 GLUD1 DIAPH1 FMNL2 DAAM1 DAAM2 BCL2 RGL3 DOCK2
5829	cytosol	3.5226e-11	1.4758e-09	33/443 7.4%	571/29994 1.9%	HDAC5 MVK NCF1 AGAP1 FOXO4 UACA FYB RPL7 RPS15 RPS14 CASP8 RPS19 RPS18 RPS3 RPS2 RPS10 WDTC1 BCAS1 TNS1 TGM2 RPS9 RPS8 RPS5 IDH1 PPP1R16A RPSA SORBS1 RPS26 FES BCL2 RPS20 BCL2L2 RPS24
44430	cytoskeletal part	4.5864e-11	1.8965e-09	36/443 8.1%	677/29994 2.2%	HDAC5 WIPF1 ARPC1B BRCA1 TTN PPP1R9B EPS8 LASP1 KIF5B MYO6 RPS6KA1 KIF1C KIF1A CGNL1 SPTBN1 CDK5RAP2 PEA15A APC2 DST MYO10 SORBS1 GRIN2C SPTB SIRT2 GFAP KIF4 KIFC2 APC PALLD NF1 LCP1 UTRN EZR NES SHANK3 MYO1F
51020	GTPase binding	5.3407e-11	2.1801e-09	14/443 3.1%	89/29994 0.2%	DOCK8 RASGRP3 FMNL3 RIMS1 AKAP13 DIAPH1 ALS2CL FMNL2 DAAM1 DAAM2 PLCE1 RGL3 DOCK2 APPL2
5085	guanyl-nucleotide exchange factor activity	8.0701e-11	3.2526e-09	16/443 3.6%	128/29994 0.4%	PSD DOCK8 IQSEC3 ARHGEF19 VAV1 FGD2 RASGRP3 FGD6 ALS2CL CYTH4 PSD4 MCF2L RAPGEF1 PLCE1 RGL3 DOCK2
267	cell fraction	8.2561e-11	3.2859e-09	45/443 10.1%	1021/29994 3.4%	CYFIP1 PYGB MVK PCX NCF1 GRIK5 ADCY4 ABAT PYGM ADD3 UACA ACACA ADCY5 BEGAIN EPS8 CYB5R3 JPH3 IRAK1 INPP5D MYO6 KDR DLGAP3 BSN PEA15A LYNX1 YES1 AGL IDH1 RPSA ANK3 GFAP ALDH5A1 SLCO1A4 SNPH WNK1 PITPNM2 NF1 BCL2 RPL29 TKT PLCD3 CSNK1G2 HCN2 VAMP3 SHANK1
48856	anatomical structure development	9.6963e-11	3.8115e-09	76/443 17.1%	2363/29994 7.8%	ACVRL1 CYFIP1 ROBO4 CLIC4 FLT1 CHD7 AMOT PPP1R9B CASP8 SALL3 KDR ACADM TNS3 TGM2 APC2 SEMA6C EDN1 VWF DST METRN ANXA4 SWAP70 SCRIB OLIG1 ANK3 ETV4 VAV1 ITPKB CLDN5 RBP4 TUBB2B VGF PALLD RAPGEF1 HCLS1 KCNQ4 ATF5 PPARA UTRN DOCK2 SHANK3 ENG HDAC5 MACF1 LAMA5 ZFP423 EPAS1 NOTCH4 LPAR1 CXCR5 ADCY1 FOXO4 TTN PLD2 NEURL1A CUX1 MYO6 GNA12 CTNNA1 MBP FLNC WASF2 ZFHX3 VEGFB SMAD5 FBXO31 PTPRB APC SST NFIC…
16310	phosphorylation	1.259e-10	4.8888e-09	38/443 8.5%	773/29994 2.5%	ACVRL1 FLT1 MVK MAST2 CAMK2A LPAR1 AK3 AATK TTBK1 HK2 RPS6KA4 HK3 IRAK1 RPS6KA1 KDR KISS1R PAK6 SPEG EPHB4 SPTBN1 MAP4K4 YES1 TNK2 CDC42BPG HUS1 PHKA1 PHKB VRK3 SMAD5 HIPK2 ITPKB SBK1 WNK1 FES BCL2 MAP3K10 CSNK1G2 CDK16
5524	ATP binding	2.1093e-10	8.0916e-09	53/443 11.9%	1375/29994 4.5%	ACVRL1 FLT1 MAST2 CHD7 AATK OPLAH HK2 RPS6KA4 HK3 KIF5B RPS6KA1 KDR KIF1C SPEG KIF1A EPHB4 SWAP70 VRK3 RENBP KIF4 AFG3L1 LARS2 KIFC2 CSNK1G2 MVK PCX CAMK2A AGAP2 ADCY4 RHOBTB3 AK3 ADCY1 TTBK1 ACACA ADCY5 RNF213 IRAK1 MYO6 PAK6 MAP4K4 YES1 MYO10 TNK2 CDC42BPG HIPK2 GLUD1 SBK1 WNK1 FES MAP3K10 ATP13A2 MYO1F CDK16
22607	cellular component assembly	2.8515e-10	1.0809e-08	31/443 6.9%	552/29994 1.8%	ACVRL1 CYFIP1 HDAC5 LAMA5 HIP1 GRIK5 LPAR1 TTN NEURL1A RPS15 RPS14 CASP8 ACADL MYO6 CTNNA1 RPS2 ACADM WASF2 RPS10 ACADS TNS1 TGM2 RDX MTSS1L SORBS1 FBXO31 DIAPH1 BCL2 LCP1 SHANK3 VAMP3
23052	signaling	2.9775e-10	1.1153e-08	104/443 23.4%	3818/29994 12.7%	FRMPD1 ABAT CIB1 AMOT RPS6KA4 RASSF2 RPS6KA1 KDR PLCE1 PGLYRP1 EPHB4 TGM2 UNC13C KCNH3 ACOT11 HUS1 SCRIB ANK2 MAPK8IP2 CLDN5 RIN2 CSNK1G2 SHC4 MACF1 SHC3 EPAS1 NOTCH4 AGAP2 LPAR1 AGAP1 FOXO4 PLCXD1 RASGRP3 IRAK1 INPP5D MYO6 MBP TAC2 SPTBN1 PEA15A HOMER2 RASL10B RASSF8 GRIN2C SMAD5 ARHGAP33 WNK1 PNOC NF1 RGL3 CNIH2 ACVRL1 ROBO4 FLT1 GRIK5 BRCA1 PANX2 MCF2L DLGAP3 SCARF2 APC2 AMN EDN1 LYNX1 KREMEN1…
48869	cellular developmental process	3.4727e-10	1.2857e-08	61/443 13.7%	1740/29994 5.8%	CYFIP1 ROBO4 CLIC4 FLT1 HIP1 MAST2 AMOT PPP1R9B CASP8 SALL3 KDR SPEG ACADM APC2 SEMA6C EDN1 DST METRN SCRIB OLIG1 ANK3 ETV4 VAV1 ITPKB RBP4 TUBB2B PALLD HCLS1 ATF5 UTRN DOCK2 ENG HDAC5 LAMA5 ZFP423 EPAS1 NXN NOTCH4 LPAR1 ADCY1 FOXO4 TTN PLD2 NEURL1A CUX1 MYO6 GNA12 CTNNA1 MBP FLNC VEGFB HUWE1 SMAD5 FBXO31 APC SST NF1 BCL2 ID4 DZIP1 NES
30154	cell differentiation	3.5632e-10	1.304e-08	60/443 13.5%	1697/29994 5.6%	CYFIP1 ROBO4 CLIC4 FLT1 HIP1 MAST2 AMOT PPP1R9B CASP8 SALL3 KDR SPEG ACADM APC2 SEMA6C EDN1 DST METRN SCRIB OLIG1 ANK3 ETV4 VAV1 ITPKB RBP4 TUBB2B PALLD HCLS1 ATF5 UTRN DOCK2 ENG HDAC5 LAMA5 ZFP423 EPAS1 NXN NOTCH4 LPAR1 ADCY1 FOXO4 TTN PLD2 NEURL1A CUX1 MYO6 GNA12 CTNNA1 MBP FLNC VEGFB HUWE1 SMAD5 FBXO31 APC SST NF1 BCL2 ID4 DZIP1
43227	membrane-bounded organelle	3.8179e-10	1.3814e-08	163/443 36.7%	7118/29994 23.7%	ALDH1L1 NCF1 PLEKHB1 ZBTB20 ABAT CIB1 ALDH1L2 AMOT RPS6KA4 RPS14 RPS19 SALL3 EME2 FTH1 KIF5B PLCE1 TGM2 CD93 SWAP70 HUS1 RPSA EBF4 VRK3 POLRMT LEMD2 4931406C07RIK AFG3L1 EEF1A1 LARS2 RBP4 PRR18 ATF5 RIN2 EMID1 RTN2 EPAS1 CABP7 NOTCH4 MAZ AGAP2 RHOBTB3 AK3 FOXO4 ACACA PLD2 CYB5R3 MOBP MYO6 MBP ST3GAL2 SPTBN1 WDTC1 SPECC1 ZFHX3 IDH1 IDH2 PARP14 SMAD5 SCRT1 BC026585 POU6F1 FBXO31 GLUD1 NF1 BCL2 ID4 …
6793	phosphorus metabolic process	4.0393e-10	1.429e-08	42/443 9.4%	956/29994 3.1%	ACVRL1 FLT1 MVK MAST2 CAMK2A LPAR1 AK3 AATK TTBK1 HK2 RPS6KA4 HK3 IRAK1 INPP5D RPS6KA1 KDR KISS1R PAK6 SPEG EPHB4 SPTBN1 MAP4K4 YES1 TNK2 CDC42BPG HUS1 PHKA1 PHKB VRK3 PTPN13 SMAD5 HIPK2 ITPKB PTPRB SBK1 WNK1 FES BCL2 MAP3K10 PTPN6 CSNK1G2 CDK16
6796	phosphate metabolic process	4.0393e-10	1.429e-08	42/443 9.4%	956/29994 3.1%	ACVRL1 FLT1 MVK MAST2 CAMK2A LPAR1 AK3 AATK TTBK1 HK2 RPS6KA4 HK3 IRAK1 INPP5D RPS6KA1 KDR KISS1R PAK6 SPEG EPHB4 SPTBN1 MAP4K4 YES1 TNK2 CDC42BPG HUS1 PHKA1 PHKB VRK3 PTPN13 SMAD5 HIPK2 ITPKB PTPRB SBK1 WNK1 FES BCL2 MAP3K10 PTPN6 CSNK1G2 CDK16
9058	biosynthetic process	4.4203e-10	1.5466e-08	83/443 18.7%	2781/29994 9.2%	RPL4 ZFP523 ALDH1L1 ST6GALNAC2 HIP1 NCF1 RPLP1 RPLP0 CHD7 ZBTB20 BRCA1 ALDH1L2 RPL7 RPS15 RPS4X RPS14 RPS19 RPL18A SALL3 RPS18 HMGCS2 CIC RPS9 RPS5 DNMT3A RPSA OLIG1 EBF4 POLRMT SPTB ETV4 EEF1A1 EEF1G LARS2 RBP4 MED25 ALDH5A1 EEF1D ATF5 RPL29 TKT PPARA ZFP652 ST6GALNAC6 YAP1 HDAC5 ZFP423 MVK PCX EPAS1 NOTCH4 MAZ ADCY4 AK3 ADCY1 FOXO4 ACACA ADCY5 TRAK2 RBM15B CYB5R3 CUX1 RPS3 RPS2 RPL18 ST3GAL2 ZF…
16740	transferase activity	5.3507e-10	1.8518e-08	58/443 13.0%	1627/29994 5.4%	ACVRL1 B4GALT2 PYGB ALDH1L1 FLT1 ST6GALNAC2 MAST2 AATK ABAT PYGM ALDH1L2 HK2 RPS6KA4 AKAP13 HK3 CPT2 RPS6KA1 KDR SPEG HMGCS2 EPHB4 TGM2 KCNH3 DNMT3A HUS1 PHKA1 VRK3 POLRMT MAPK8IP2 ITPKB RBP4 TKT CSNK1G2 ST6GALNAC6 MVK CAMK2A AK3 TTBK1 IRAK1 MGAT5B PAK6 ST3GAL2 MAP4K4 YES1 B3GAT3 AGL TNK2 CDC42BPG PHKB PARP14 HIPK2 SBK1 PSAT1 WNK1 FES MGAT4B MAP3K10 CDK16
51128	regulation of cellular component organization	5.5314e-10	1.8938e-08	27/443 6.0%	438/29994 1.4%	KANK2 CYFIP1 HDAC5 HIP1 ARPC1B GRIK5 LPAR1 PLD2 EPB41L2 PALM GNA12 KISS1R MBP SPTBN1 APC2 GSN DST METRN ARAP3 SORBS1 SPTB APC SNPH PALLD EZR FERMT2 MYO1F
43231	intracellular membrane-bounded organelle	6.38e-10	2.1493e-08	162/443 36.5%	7106/29994 23.6%	ALDH1L1 NCF1 PLEKHB1 ZBTB20 ABAT CIB1 ALDH1L2 AMOT RPS6KA4 RPS14 RPS19 SALL3 EME2 FTH1 PLCE1 TGM2 CD93 SWAP70 HUS1 RPSA EBF4 VRK3 POLRMT LEMD2 4931406C07RIK AFG3L1 EEF1A1 LARS2 RBP4 PRR18 ATF5 RIN2 EMID1 RTN2 EPAS1 CABP7 NOTCH4 MAZ AGAP2 RHOBTB3 AK3 FOXO4 ACACA PLD2 CYB5R3 MOBP MYO6 MBP ST3GAL2 SPTBN1 WDTC1 SPECC1 ZFHX3 IDH1 IDH2 PARP14 SMAD5 SCRT1 BC026585 POU6F1 FBXO31 GLUD1 NF1 BCL2 ID4 DZIP1 …
17016	Ras GTPase binding	6.4129e-10	2.1493e-08	12/443 2.7%	72/29994 0.2%	FMNL3 RIMS1 AKAP13 DIAPH1 ALS2CL FMNL2 DAAM1 DAAM2 PLCE1 RGL3 APPL2 RASGRP3
44249	cellular biosynthetic process	1.176e-09	3.9004e-08	80/443 18.0%	2691/29994 8.9%	RPL4 ZFP523 ST6GALNAC2 HIP1 NCF1 RPLP1 RPLP0 CHD7 ZBTB20 BRCA1 RPL7 RPS15 RPS4X RPS14 RPS19 RPL18A SALL3 RPS18 HMGCS2 CIC RPS9 RPS5 DNMT3A RPSA OLIG1 EBF4 POLRMT SPTB ETV4 EEF1A1 EEF1G LARS2 RBP4 MED25 ALDH5A1 EEF1D ATF5 RPL29 TKT PPARA ZFP652 ST6GALNAC6 YAP1 HDAC5 ZFP423 MVK PCX EPAS1 NOTCH4 MAZ ADCY4 AK3 ADCY1 FOXO4 ACACA ADCY5 TRAK2 RBM15B CUX1 RPS3 RPS2 RPL18 ST3GAL2 ZFHX3 TAF13 VEGFB EEF2 PA…
6468	protein amino acid phosphorylation	1.3881e-09	4.5566e-08	32/443 7.2%	624/29994 2.0%	ACVRL1 FLT1 MAST2 CAMK2A LPAR1 AATK TTBK1 RPS6KA4 IRAK1 RPS6KA1 KDR KISS1R PAK6 SPEG EPHB4 SPTBN1 MAP4K4 YES1 TNK2 CDC42BPG HUS1 PHKA1 VRK3 SMAD5 HIPK2 SBK1 WNK1 FES BCL2 MAP3K10 CSNK1G2 CDK16
