# Supplementary material for: The Differences in Local Translatome across Distinct Neuron Types Is Mediated by Both Baseline Cellular Differences and Post-transcriptional Mechanisms
Source: eNeuro. 2019 Feb 4;5(6):ENEURO.0320-18.2018. doi: 10.1523/ENEURO.0320-18.2018 (PMC6361723; doi:10.1523/ENEURO.0320-18.2018)
Supplement: Figure 4-3 — GO analysis results of shared local translation candidates with a significance cutoff, p = 5E-8. Full table of GO analysis results of shared local translation candidates with a significance cutoff, p = 5E-8. Column headers are as in Figure 4-1. Download Figure 4-3, XLS file. [file sup_enu-eN-NWR-0320-18-s11.xls]

## Sheet: Sheet1
GO-ID	Description	p-value	corr p-val	cluster freq	total freq	genes
44464	cell part	1.4039e-25	1.3345e-22	152/179 84.9%	14253/30002 47.5%	GLTP RPL4 WIPF1 FRMPD1 PLEKHB1 CIB1 UBE3B AMOT EPS8 RIMS1 RIMS4 KIF5B PALM KDR TNS3 EPHB4 TNS1 KCNH3 UNC13C PPP1R16A RPSA VRK3 KCNQ4 PRR18 RPL29 EZR CSNK1G2 EMID1 RTN2 TBC1D9B CABP7 EPAS1 MAZ AGAP2 LPAR1 AGAP1 TTBK1 CYB5R3 MOBP EPB41L1 EPB41L2 MYO6 CDH22 MBP ST3GAL2 WDTC1 YES1 RASL10B HOMER2 IDH2 RDX IQSEC3 EEF2 SCRT1 POU6F1 GFAP FBXO31 ARHGAP33 GLUD1 DIAPH1 TMCC2 CNIH2 DZIP1 MXD4 ACVRL1 B4GALT2 …
5623	cell	1.4166e-25	1.3345e-22	152/179 84.9%	14254/30002 47.5%	GLTP RPL4 WIPF1 FRMPD1 PLEKHB1 CIB1 UBE3B AMOT EPS8 RIMS1 RIMS4 KIF5B PALM KDR TNS3 EPHB4 TNS1 KCNH3 UNC13C PPP1R16A RPSA VRK3 KCNQ4 PRR18 RPL29 EZR CSNK1G2 EMID1 RTN2 TBC1D9B CABP7 EPAS1 MAZ AGAP2 LPAR1 AGAP1 TTBK1 CYB5R3 MOBP EPB41L1 EPB41L2 MYO6 CDH22 MBP ST3GAL2 WDTC1 YES1 RASL10B HOMER2 IDH2 RDX IQSEC3 EEF2 SCRT1 POU6F1 GFAP FBXO31 ARHGAP33 GLUD1 DIAPH1 TMCC2 CNIH2 DZIP1 MXD4 ACVRL1 B4GALT2 …
5488	binding	2.7995e-24	1.7581e-21	128/179 71.5%	10292/30002 34.3%	GLTP RPL4 WIPF1 FRMPD1 PLEKHB1 CIB1 RIMS1 KIF5B PALM KDR TNS3 EPHB4 TNS1 UNC13C RPSA VRK3 DAAM2 RPL29 EZR CSNK1G2 EMID1 SHC3 TBC1D9B CABP7 EPAS1 MAZ AGAP2 LPAR1 AGAP1 TTBK1 CYB5R3 EPB41L1 EPB41L2 NACC2 MYO6 CDH22 MBP WDTC1 YES1 RASL10B HOMER2 IDH2 RDX EEF2 SCRT1 POU6F1 GFAP FBXO31 ARHGAP33 GLUD1 DIAPH1 MAP3K10 DZIP1 CDK16 MXD4 ACVRL1 B4GALT2 ZFP523 GRIK5 ARPC1B AATK BRCA1 HK2 RLBP1 PPP1R9B PANX2 …
5622	intracellular	4.0927e-23	1.9277e-20	123/179 68.7%	9781/30002 32.6%	GLTP RPL4 WIPF1 FRMPD1 PLEKHB1 CIB1 UBE3B AMOT EPS8 KIF5B PALM KDR TNS1 UNC13C PPP1R16A RPSA VRK3 KCNQ4 PRR18 RPL29 EZR CSNK1G2 EMID1 RTN2 TBC1D9B CABP7 EPAS1 MAZ AGAP2 LPAR1 AGAP1 TTBK1 CYB5R3 MOBP EPB41L1 EPB41L2 MYO6 MBP ST3GAL2 WDTC1 YES1 HOMER2 IDH2 RDX IQSEC3 EEF2 SCRT1 POU6F1 GFAP FBXO31 ARHGAP33 GLUD1 DIAPH1 DZIP1 MXD4 B4GALT2 ZFP523 ARPC1B AATK BRCA1 HK2 RLBP1 PPP1R9B JPH3 ACADL ALDH2 SH…
5515	protein binding	2.9594e-22	1.1151e-19	89/179 49.7%	5383/30002 17.9%	RPL4 ACVRL1 ZFP523 WIPF1 FRMPD1 GRIK5 ARPC1B PLEKHB1 AATK BRCA1 PPP1R9B RIMS1 PANX2 ALDH2 SH3PXD2A KIF5B PALM KDR DLGAP3 TNS3 EPHB4 TNS1 BCAS1 AMN VWF DST RPSA OLIG1 ARAP1 VRK3 RHOC MED25 VGF DAAM2 TRAF3 PALLD LCP1 EZR SHANK3 CSNK1G2 EMID1 SHANK1 TRIM56 HDAC5 ZFP423 SHC3 WBP1 EPAS1 MAZ CAMK2A AGAP2 LPAR1 ADCY4 MLLT1 ADCY1 UACA TRAK2 NEURL1A NEURL1B PDLIM2 OS9 EPB41L1 EPB41L2 NACC2 MYO6 GNA12 KISS…
44424	intracellular part	1.1352e-19	3.5645e-17	116/179 64.8%	9545/30002 31.8%	GLTP RPL4 WIPF1 FRMPD1 PLEKHB1 CIB1 AMOT EPS8 KIF5B PALM KDR TNS1 UNC13C PPP1R16A RPSA VRK3 KCNQ4 PRR18 RPL29 EZR CSNK1G2 EMID1 RTN2 CABP7 EPAS1 MAZ AGAP2 LPAR1 AGAP1 TTBK1 CYB5R3 MOBP EPB41L1 EPB41L2 MYO6 MBP ST3GAL2 WDTC1 YES1 HOMER2 IDH2 RDX IQSEC3 EEF2 SCRT1 POU6F1 GFAP FBXO31 ARHGAP33 GLUD1 DIAPH1 DZIP1 MXD4 B4GALT2 ZFP523 ARPC1B AATK BRCA1 HK2 RLBP1 PPP1R9B JPH3 ACADL ALDH2 SH3PXD2A KIF1C H…
5737	cytoplasm	5.5057e-19	1.4818e-16	95/179 53.0%	6765/30002 22.5%	GLTP RPL4 B4GALT2 WIPF1 FRMPD1 ARPC1B PLEKHB1 AATK CIB1 BRCA1 HK2 RLBP1 AMOT PPP1R9B JPH3 ACADL ALDH2 SH3PXD2A KIF5B PALM KDR KIF1C TNS1 BCAS1 UNC13C DST AKTIP PPP1R16A RPSA ARAP1 FAM126A SIRT2 VGF SNPH PALLD KCNQ4 PRR18 LCP1 RPL29 EZR SHANK3 CSNK1G2 EMID1 ST6GALNAC6 RTN2 KANK2 HDAC5 MVK CABP7 EPAS1 CAMK2A AGAP2 LPAR1 AGAP1 UACA TTBK1 ADCY5 FGD2 TRAK2 BEGAIN DDN NEURL1A CYB5R3 FGD6 PDLIM2 MOBP OS…
9987	cellular process	6.8211e-17	1.6064e-14	107/179 59.7%	8925/30002 29.7%	RPL4 WIPF1 CIB1 UBE3B AMOT EPS8 RIMS1 RIMS4 KIF5B PALM KDR TNS3 EPHB4 TNS1 KCNH3 UNC13C RPSA VRK3 DAAM2 KCNQ4 RPL29 EZR CSNK1G2 SHC3 EPAS1 MAZ AGAP2 LPAR1 AGAP1 TTBK1 EPB41L1 EPB41L2 MYO6 CDH22 MBP ST3GAL2 WDTC1 YES1 IDH2 RDX EEF2 SCRT1 POU6F1 GFAP FBXO31 ARHGAP33 GLUD1 DIAPH1 MAP3K10 DZIP1 CDK16 MXD4 ACVRL1 ZFP523 GRIK5 AATK BRCA1 HK2 PPP1R9B PANX2 ACADL SH3PXD2A KIF1C DLGAP3 AMN VWF DST GP1BB A…
5886	plasma membrane	1.7862e-16	3.7391e-14	57/179 31.8%	2908/30002 9.6%	FRMPD1 GRIK5 CIB1 AMOT PPP1R9B EPS8 RIMS1 PANX2 RIMS4 JPH3 PALM KDR DLGAP3 TNS3 EPHB4 TNS1 UNC13C VWF DST GP1BB AKTIP PPP1R16A RPSA ARAP1 RHOC SNPH KCNQ4 LCP1 EZR SHANK3 AHNAK CABP7 CAMK2A LPAR1 ADCY4 ADCY1 ADCY5 FGD2 TRAK2 DDN NEURL1A GPR153 GNG7 MYO6 CDH22 GNA12 KISS1R MBP RASL10B RDX ERBIN ARHGAP33 DIAPH1 APC PTPN6 LIMS2 CRLF2
8092	cytoskeletal protein binding	5.4621e-14	1.0291e-11	21/179 11.7%	405/30002 1.3%	HDAC5 GSN DST WIPF1 HOMER2 ARPC1B MTSS1L PPP1R9B DIAPH1 PDLIM2 FMNL2 APC DAAM2 EPB41L1 PALLD KIF5B EPB41L2 MYO6 LCP1 EZR TNS1
3779	actin binding	9.3843e-13	1.6073e-10	17/179 9.4%	275/30002 0.9%	HDAC5 GSN DST WIPF1 HOMER2 ARPC1B MTSS1L PPP1R9B DIAPH1 FMNL2 DAAM2 EPB41L1 PALLD EPB41L2 MYO6 LCP1 TNS1
50794	regulation of cellular process	1.6863e-12	2.6475e-10	80/179 44.6%	6373/30002 21.2%	ACVRL1 ZFP523 FRMPD1 GRIK5 ARPC1B BRCA1 AMOT PPP1R9B RIMS1 ACADL PALM KDR TNS3 TNS1 PSD KCNH3 UNC13C AMN DST AKTIP OLIG1 ARAP1 VRK3 RHOC SIRT2 MED25 VGF TRAF3 SNPH PALLD KCNQ4 EZR SHANK3 KANK2 HDAC5 ZFP423 TBC1D9B MVK EPAS1 MAZ CAMK2A AGAP2 LPAR1 ADCY4 AGAP1 MLLT1 ADCY1 UACA CENPB ADCY5 FGD2 TRAK2 FGD6 GPR153 EPB41L2 GNG7 MYO6 GNA12 KISS1R MBP WDTC1 MAP4K4 GSN RASL10B IQSEC3 VEGFB MTSS1L SCRT1 PO…
42995	cell projection	2.9599e-12	4.2896e-10	27/179 15.0%	877/30002 2.9%	ACVRL1 GRIK5 PLEKHB1 CAMK2A LPAR1 ADCY4 CIB1 AMOT PPP1R9B FGD2 DDN SH3PXD2A KIF5B MYO6 GNA12 KDR MBP DLGAP3 GSN RDX DIAPH1 VGF APC PALLD KCNQ4 LCP1 EZR
16020	membrane	3.2207e-12	4.3341e-10	87/179 48.6%	7393/30002 24.6%	ACVRL1 B4GALT2 FAM57B FRMPD1 GRIK5 PLEKHB1 AATK CIB1 ELFN2 AMOT PPP1R9B EPS8 RIMS1 PANX2 RIMS4 JPH3 ACADL TMEM44 PALM KDR DLGAP3 TNS3 EPHB4 TNS1 PSD KCNH3 UNC13C AMN VWF DST GP1BB AKTIP PPP1R16A RPSA ARAP1 RHOC FAM126A VGF SNPH KCNQ4 LCP1 EZR SHANK3 ST6GALNAC6 SHANK1 RTN2 TBC1D9B AHNAK CABP7 CAMK2A LPAR1 ADCY4 ADCY1 ADCY5 FGD2 TRAK2 BEGAIN DDN NEURL1A CYB5R3 GPR153 EPB41L1 EPB41L2 MGAT5B GNG7 MYO…
50789	regulation of biological process	2.4133e-11	3.0311e-09	80/179 44.6%	6698/30002 22.3%	ACVRL1 ZFP523 FRMPD1 GRIK5 ARPC1B BRCA1 AMOT PPP1R9B RIMS1 ACADL PALM KDR TNS3 TNS1 PSD KCNH3 UNC13C AMN DST AKTIP OLIG1 ARAP1 VRK3 RHOC SIRT2 MED25 VGF TRAF3 SNPH PALLD KCNQ4 EZR SHANK3 KANK2 HDAC5 ZFP423 TBC1D9B MVK EPAS1 MAZ CAMK2A AGAP2 LPAR1 ADCY4 AGAP1 MLLT1 ADCY1 UACA CENPB ADCY5 FGD2 TRAK2 FGD6 GPR153 EPB41L2 GNG7 MYO6 GNA12 KISS1R MBP WDTC1 MAP4K4 GSN RASL10B IQSEC3 VEGFB MTSS1L SCRT1 PO…
7010	cytoskeleton organization	3.0561e-11	3.5985e-09	16/179 8.9%	294/30002 0.9%	GSN DST WIPF1 AGAP2 BRCA1 FBXO31 PPP1R9B EPS8 NEURL1A DIAPH1 FMNL2 DAAM2 EPB41L1 EPB41L2 PALM LCP1
5856	cytoskeleton	4.0323e-11	4.4688e-09	29/179 16.2%	1137/30002 3.7%	HDAC5 WIPF1 FRMPD1 ARPC1B BRCA1 UACA PPP1R9B FGD2 EPS8 FGD6 PDLIM2 EPB41L1 KIF5B EPB41L2 MYO6 KIF1C GSN DST MYO10 SIRT2 GFAP FBXO31 DIAPH1 KIFC2 APC PALLD LCP1 EZR SHANK3
65007	biological regulation	7.922e-11	8.2917e-09	82/179 45.8%	7125/30002 23.7%	ACVRL1 ZFP523 FRMPD1 GRIK5 ARPC1B BRCA1 AMOT PPP1R9B RIMS1 ACADL PALM KDR TNS3 TNS1 PSD KCNH3 UNC13C AMN VWF DST GP1BB AKTIP OLIG1 ARAP1 VRK3 RHOC SIRT2 MED25 VGF TRAF3 SNPH PALLD KCNQ4 EZR SHANK3 KANK2 HDAC5 ZFP423 TBC1D9B MVK EPAS1 MAZ CAMK2A AGAP2 LPAR1 ADCY4 AGAP1 MLLT1 ADCY1 UACA CENPB ADCY5 FGD2 TRAK2 FGD6 GPR153 EPB41L2 GNG7 MYO6 GNA12 KISS1R MBP WDTC1 MAP4K4 GSN RASL10B IQSEC3 VEGFB MTSS1…
43228	non-membrane-bounded organelle	1.2267e-10	1.1556e-08	36/179 20.1%	1798/30002 5.9%	RPL4 HDAC5 WIPF1 FRMPD1 ARPC1B BRCA1 UACA CENPB PPP1R9B FGD2 EPS8 FGD6 PDLIM2 EPB41L1 KIF5B EPB41L2 MYO6 KIF1C RPS2 RPL18 GSN DST MYO10 RDX RPSA SIRT2 GFAP FBXO31 DIAPH1 KIFC2 APC PALLD LCP1 RPL29 EZR SHANK3
43232	intracellular non-membrane-bounded organelle	1.2267e-10	1.1556e-08	36/179 20.1%	1798/30002 5.9%	RPL4 HDAC5 WIPF1 FRMPD1 ARPC1B BRCA1 UACA CENPB PPP1R9B FGD2 EPS8 FGD6 PDLIM2 EPB41L1 KIF5B EPB41L2 MYO6 KIF1C RPS2 RPL18 GSN DST MYO10 RDX RPSA SIRT2 GFAP FBXO31 DIAPH1 KIFC2 APC PALLD LCP1 RPL29 EZR SHANK3
30054	cell junction	2.3015e-10	2.0648e-08	19/179 10.6%	505/30002 1.6%	UNC13C DST AHNAK GRIK5 CAMK2A ERBIN AMOT PPP1R9B RIMS1 PANX2 RIMS4 APC SNPH LCP1 DLGAP3 TNS3 SHANK3 LIMS2 TNS1
44459	plasma membrane part	5.6671e-10	4.8531e-08	31/179 17.3%	1445/30002 4.8%	AHNAK GRIK5 CAMK2A AMOT PPP1R9B EPS8 RIMS1 PANX2 RIMS4 GNG7 MYO6 GNA12 KDR KISS1R DLGAP3 TNS3 EPHB4 TNS1 UNC13C VWF DST GP1BB ERBIN APC SNPH KCNQ4 PTPN6 LCP1 EZR SHANK3 LIMS2
