# Supplementary material for: The Differences in Local Translatome across Distinct Neuron Types Is Mediated by Both Baseline Cellular Differences and Post-transcriptional Mechanisms
Source: eNeuro. 2019 Feb 4;5(6):ENEURO.0320-18.2018. doi: 10.1523/ENEURO.0320-18.2018 (PMC6361723; doi:10.1523/ENEURO.0320-18.2018)
Supplement: Figure 9-1 — Table containing differential expression statistics for all direct comparisons between the two neuron types. Log-fold change (logFC), p values, and adjusted p values (FDR) for each of three EdgeR comparisons. Statistical comparisons were performed between RBP4 and VGAT SynapTRAP samples (PValue.ST_RBP4vVGAT), as well as between RBP4 and VGAT WCH samples (PreIP_RvV), as well as an interaction term, which tests the extent to which cell type differences in the ST fraction are not found in TRAP fractions, indicating substantial post-transcriptional regulation. Download Figure 9-1, XLS file. [file sup_enu-eN-NWR-0320-18-s18.xls]

## Sheet: Allie DE_table_for_supplement w
ens_id	gene_name	logFC.ST_Rbp4vVgat	PValue.ST_Rbp4vVgat	FDR.ST_Rbp4vVgat	logFC.Interaction	PValue.Interaction	FDR.Interaction	logFC.PreIP_RvV	PValue.PreIP_RvV	FDR.PreIP_RvV
ENSMUSG00000000001	Gnai3	0.197067	0.238031	0.671813	-0.0326024	0.890322	0.956234	-0.0221232	0.893835	0.999711
ENSMUSG00000000028	Cdc45	0.144863	0.645984	0.89702	-0.584547	0.184509	0.436084	0.427059	0.165735	0.999711
ENSMUSG00000000049	Apoh	-0.37411	0.235242	0.669092	0.230524	0.601659	0.81382	0.0499279	0.877027	0.999711
ENSMUSG00000000056	Narf	0.253134	0.0847212	0.479859	0.178207	0.388124	0.656588	-0.0176917	0.903096	0.999711
ENSMUSG00000000058	Cav2	0.30863	0.297698	0.718825	-0.246712	0.555665	0.782976	-0.21014	0.477435	0.999711
ENSMUSG00000000078	Klf6	0.137051	0.378874	0.77246	-0.713193	0.00113096	0.0114629	-0.163783	0.282769	0.999711
ENSMUSG00000000085	Scmh1	-0.0875763	0.513417	0.847819	0.0984432	0.603429	0.815204	-0.0965592	0.470118	0.999711
ENSMUSG00000000088	Cox5a	-0.0534617	0.787342	0.940829	0.624019	0.0251404	0.122546	-0.154559	0.433896	0.999711
ENSMUSG00000000125	Wnt3	0.208267	0.581063	0.874031	-0.591285	0.274834	0.546015	0.54892	0.137302	0.999711
ENSMUSG00000000126	Wnt9a	0.464653	0.044918	0.382926	-1.99427	6.69287e-09	3.05482e-07	-0.324156	0.165855	0.999711
ENSMUSG00000000127	Fer	-0.419049	0.00427225	0.14888	-0.118604	0.566512	0.789298	-0.230474	0.113982	0.999711
ENSMUSG00000000131	Xpo6	0.0840618	0.61859	0.890621	-0.384289	0.10751	0.318219	0.283036	0.0929397	0.999711
ENSMUSG00000000134	Tfe3	0.113451	0.489941	0.836869	-0.0136239	0.952949	0.980714	0.123016	0.450904	0.999711
ENSMUSG00000000142	Axin2	-0.27435	0.121264	0.53038	0.0997094	0.694259	0.868704	-0.239034	0.172191	0.999711
ENSMUSG00000000148	Brat1	-0.0959822	0.655119	0.900239	-0.376219	0.212445	0.471787	0.277008	0.18768	0.999711
ENSMUSG00000000149	Gna12	-0.187704	0.476131	0.829504	-0.00613527	0.987056	0.994335	-0.377962	0.153785	0.999711
ENSMUSG00000000167	Pih1d2	-0.139321	0.627714	0.892364	-1.15086	0.00307878	0.0254897	0.187147	0.462755	0.999711
ENSMUSG00000000168	Dlat	0.170839	0.367609	0.765238	0.340405	0.202337	0.458162	0.0545055	0.772364	0.999711
ENSMUSG00000000171	Sdhd	0.30278	0.10298	0.505078	0.351023	0.180515	0.430918	0.0657054	0.722836	0.999711
ENSMUSG00000000184	Ccnd2	-0.232293	0.311831	0.73088	-0.176434	0.587152	0.804422	-0.109494	0.633569	0.999711
ENSMUSG00000000194	Gpr107	0.0307804	0.848128	0.95804	-0.306596	0.182079	0.432917	0.243884	0.133242	0.999711
ENSMUSG00000000197	Nalcn	0.18045	0.324955	0.739101	0.276919	0.286203	0.558408	-0.0325232	0.859408	0.999711
ENSMUSG00000000214	Th	-0.696325	0.0334477	0.342206	3.9574	5.19942e-17	1.0749e-14	-0.400881	0.209458	0.999711
ENSMUSG00000000223	Drp2	-0.191407	0.197111	0.634306	-0.431695	0.039888	0.169717	-0.0540742	0.714179	0.999711
ENSMUSG00000000247	Lhx2	-0.370594	0.346665	0.753698	-2.20373	9.58267e-05	0.00148526	-0.135911	0.73032	0.999711
ENSMUSG00000000253	Gmpr	0.397671	0.0360216	0.352107	0.0947541	0.720499	0.879387	0.1461	0.434722	0.999711
ENSMUSG00000000266	Mid2	0.348574	0.0967358	0.49807	1.21579	4.28676e-05	0.000738371	0.103416	0.618212	0.999711
ENSMUSG00000000275	Trim25	-0.0555153	0.880371	0.966668	-0.377161	0.505163	0.750366	0.0607577	0.872831	0.999711
ENSMUSG00000000276	Dgke	0.210625	0.266321	0.693835	-0.201107	0.453622	0.710644	0.0414162	0.826677	0.999711
ENSMUSG00000000278	Scpep1	0.0813349	0.683078	0.912111	0.201232	0.475497	0.728211	0.151664	0.447134	0.999711
ENSMUSG00000000282	Mnt	0.0875668	0.640102	0.895652	-0.256353	0.33579	0.608841	-0.0744777	0.693017	0.999711
ENSMUSG00000000295	Hddc2	0.301081	0.310675	0.729858	-0.463807	0.269164	0.539621	0.434704	0.143705	0.999711
ENSMUSG00000000296	Tpd52l1	0.564808	0.00351849	0.137016	-0.229458	0.393201	0.660935	0.134673	0.473113	0.999711
ENSMUSG00000000301	Pemt	0.266563	0.220354	0.657275	0.0127025	0.966369	0.986565	0.327452	0.141477	0.999711
ENSMUSG00000000305	Cdh4	0.181958	0.395498	0.781875	0.171542	0.573561	0.795295	0.211259	0.32412	0.999711
ENSMUSG00000000308	Ckmt1	0.167069	0.416293	0.790133	-0.163009	0.574593	0.795536	-0.02955	0.885581	0.999711
ENSMUSG00000000317	Bcl6b	0.403757	0.173386	0.604079	-1.69924	6.88988e-05	0.00111203	0.0209152	0.938188	0.999711
ENSMUSG00000000339	Rtca	0.577832	0.00089641	0.0676792	0.252489	0.286408	0.558557	0.126802	0.444447	0.999711
ENSMUSG00000000340	Dbt	-0.0683003	0.800277	0.945723	0.611923	0.11084	0.323611	0.0529894	0.844789	0.999711
ENSMUSG00000000346	Dazap2	0.403593	0.110754	0.515728	0.279321	0.434542	0.696555	0.0813241	0.747564	0.999711
ENSMUSG00000000355	Mcts1	0.222418	0.232468	0.668316	0.624734	0.0173498	0.0948674	-0.0870638	0.638464	0.999711
ENSMUSG00000000374	Trappc10	0.0987645	0.567372	0.868649	0.605372	0.0137425	0.0802295	0.0351258	0.839003	0.999711
ENSMUSG00000000378	Ccm2	-0.0958228	0.475589	0.829274	0.790405	2.91916e-05	0.000524776	-0.128285	0.340296	0.999711
ENSMUSG00000000384	Tbrg4	-0.204863	0.177223	0.610622	-0.0959466	0.649227	0.844231	-0.0250472	0.867374	0.999711
ENSMUSG00000000392	Fap	0.662123	0.0395358	0.365089	-2.7716	1.26167e-08	5.35847e-07	0.1038	0.736831	0.999711
ENSMUSG00000000399	Ndufa9	0.0525304	0.771217	0.937851	0.245657	0.336159	0.609125	0.112997	0.531723	0.999711
ENSMUSG00000000402	Egfl6	-0.110811	0.727332	0.923903	0.563916	0.249478	0.51524	0.656331	0.0549241	0.999711
ENSMUSG00000000409	Lck	0.300607	0.262458	0.691675	0.625324	0.0752461	0.255723	0.216664	0.358175	0.999711
ENSMUSG00000000416	Cttnbp2	-0.348772	0.188606	0.62306	-0.795646	0.0337771	0.151609	0.0789707	0.764293	0.999711
ENSMUSG00000000420	Galnt1	0.182099	0.309394	0.728675	0.406534	0.111042	0.323931	0.200887	0.264944	0.999711
ENSMUSG00000000439	Mkrn2	0.454114	0.00910283	0.205736	0.268832	0.26892	0.539298	0.17154	0.315968	0.999711
ENSMUSG00000000440	Pparg	0.241162	0.43918	0.806446	0.452134	0.258306	0.526065	0.172412	0.469652	0.999711
ENSMUSG00000000441	Raf1	-0.0126116	0.924229	0.979327	0.0814252	0.662243	0.851356	0.111258	0.394898	0.999711
ENSMUSG00000000486	2018-09-01	0.560205	0.107392	0.510395	2.69398	7.35947e-09	3.32667e-07	-0.434669	0.171321	0.999711
ENSMUSG00000000489	Pdgfb	0.528851	0.0558478	0.409656	-0.904581	0.021142	0.108354	0.0746149	0.788298	0.999711
ENSMUSG00000000530	Acvrl1	-0.271634	0.525712	0.85222	2.15978	0.000496196	0.00577922	-0.481552	0.28229	0.999711
ENSMUSG00000000531	Grasp	0.413743	0.0893197	0.487639	-0.420091	0.217818	0.476792	-0.0697706	0.773435	0.999711
ENSMUSG00000000532	Acvr1b	0.255503	0.201525	0.639945	-0.317629	0.263929	0.53309	0.11372	0.572896	0.999711
ENSMUSG00000000538	Tom1l2	-0.0964216	0.459152	0.818613	0.156997	0.3946	0.662284	-0.151694	0.244683	0.999711
ENSMUSG00000000552	Zfp385a	-0.234071	0.294582	0.715362	2.0862	1.02824e-11	8.5029e-10	-0.300414	0.168693	0.999711
ENSMUSG00000000555	Itga5	-0.678264	0.110022	0.514695	2.15896	0.000423577	0.00505488	0.0559983	0.894507	0.999711
ENSMUSG00000000560	Gabra2	0.917449	1.81396e-06	0.000910737	-0.218026	0.42035	0.684801	0.430164	0.0239527	0.999711
ENSMUSG00000000561	Wdr77	0.36624	0.0226761	0.290858	0.0654008	0.771175	0.906378	0.120232	0.44615	0.999711
ENSMUSG00000000563	Atp5f1	0.117311	0.435591	0.803837	0.485119	0.0225389	0.113771	-0.0588805	0.695374	0.999711
ENSMUSG00000000567	Sox9	0.000990434	0.997832	0.999449	-0.365316	0.481008	0.731948	-0.0919767	0.80078	0.999711
ENSMUSG00000000568	Hnrnpd	0.48948	0.0202454	0.278756	0.757887	0.0105566	0.0660457	-0.00901115	0.965581	0.999711
ENSMUSG00000000581	C1d	0.395356	0.0759583	0.45692	0.718258	0.0223247	0.113047	0.0579358	0.793995	0.999711
ENSMUSG00000000594	Gm2a	0.817068	0.0165497	0.255947	0.335179	0.484546	0.734751	0.108349	0.749141	0.999711
ENSMUSG00000000600	Krit1	-0.382042	0.176212	0.609405	-0.31552	0.426849	0.689595	-0.00592987	0.982981	0.999711
ENSMUSG00000000605	Clcn4	0.105601	0.503792	0.842831	-0.357444	0.109855	0.321738	0.171948	0.276706	0.999711
ENSMUSG00000000627	Sema4f	0.100469	0.575544	0.871532	-0.314346	0.217991	0.47701	-0.0835785	0.642983	0.999711
ENSMUSG00000000628	Hk2	-0.220267	0.485968	0.834869	-1.57218	0.000757042	0.00818024	0.150611	0.642344	0.999711
ENSMUSG00000000631	Myo18a	0.0586369	0.853258	0.958966	-0.0744886	0.868149	0.947342	0.0894194	0.778567	0.999711
ENSMUSG00000000632	Sez6	0.160087	0.467784	0.823651	0.0552252	0.859478	0.943874	0.0933055	0.672497	0.999711
ENSMUSG00000000682	Cd52	-0.97269	0.0064519	0.177033	-0.527772	0.3241	0.597903	-0.222447	0.542485	0.999711
ENSMUSG00000000708	Kat2b	0.01795	0.941575	0.984295	0.941679	0.00727949	0.0497497	0.178067	0.468022	0.999711
ENSMUSG00000000711	Rab5b	0.227867	0.209039	0.646988	0.121202	0.635636	0.836057	0.0477978	0.790741	0.999711
ENSMUSG00000000738	Spg7	-0.0544851	0.767485	0.936874	-0.47057	0.0729952	0.251059	0.0326913	0.861461	0.999711
ENSMUSG00000000740	Rpl13	-0.114396	0.70601	0.917885	0.52266	0.223682	0.485117	0.0142181	0.963353	0.999711
ENSMUSG00000000743	Chmp1a	0.129562	0.279072	0.703712	-0.393611	0.0198475	0.103646	0.0634116	0.597865	0.999711
ENSMUSG00000000751	Rpa1	0.109935	0.476477	0.82953	-0.0425649	0.844988	0.938845	-0.0131326	0.931918	0.999711
ENSMUSG00000000753	Serpinf1	-0.287537	0.314348	0.733153	1.92619	1.23053e-05	0.000251243	-0.0105213	0.972084	0.999711
ENSMUSG00000000759	Tubgcp3	0.173302	0.335888	0.745959	-0.0988634	0.693482	0.868316	0.125416	0.467038	0.999711
ENSMUSG00000000766	Oprm1	-0.870597	0.0726681	0.449634	-0.399908	0.556193	0.78315	0.435043	0.335086	0.999711
ENSMUSG00000000776	Polr3d	-0.0342207	0.856481	0.959862	0.261919	0.311882	0.586264	-0.0646483	0.720955	0.999711
ENSMUSG00000000782	Tcf7	-0.133259	0.735247	0.926673	3.57007	7.88537e-10	4.61885e-08	-0.506866	0.188461	0.999711
ENSMUSG00000000787	Ddx3x	0.375654	0.0233381	0.29348	0.621368	0.00787048	0.0527375	-0.00591939	0.971379	0.999711
ENSMUSG00000000792	Slc5a5	0.743902	0.00207653	0.101476	0.115582	0.731446	0.884378	0.132826	0.581819	0.999711
ENSMUSG00000000794	Kcnn3	-0.216413	0.274786	0.698542	0.345669	0.229692	0.492195	0.00278032	0.989017	0.999711
ENSMUSG00000000804	Usp32	0.107094	0.519043	0.849263	0.0848172	0.718036	0.878469	-0.211387	0.201716	0.999711
ENSMUSG00000000805	Car4	0.614955	0.0129909	0.230589	-0.956619	0.00627865	0.0442675	0.215772	0.382125	0.999711
ENSMUSG00000000811	Txnrd3	0.18411	0.462493	0.820408	-0.241238	0.488439	0.73773	-0.0479153	0.848816	0.999711
ENSMUSG00000000823	Zfp512b	0.528974	0.0263136	0.308071	-0.10243	0.760265	0.900329	0.414333	0.0807737	0.999711
ENSMUSG00000000826	Dnajc5	0.151826	0.239337	0.671813	0.431435	0.018021	0.0973129	-0.02983	0.816961	0.999711
ENSMUSG00000000827	Tpd52l2	0.128896	0.313941	0.732999	-0.0609124	0.734444	0.885594	0.0827731	0.511073	0.999711
ENSMUSG00000000838	Fmr1	-0.0608939	0.740842	0.928956	-0.345049	0.184446	0.436083	-0.182578	0.316383	0.999711
ENSMUSG00000000861	Bcl11a	-0.257136	0.215507	0.652594	-0.112974	0.699323	0.869668	-0.0299729	0.884366	0.999711
ENSMUSG00000000869	Il4	0.172681	0.51294	0.847819	0.205519	0.553746	0.782367	-0.272254	0.219793	0.999711
ENSMUSG00000000876	Pxmp4	-0.405849	0.0181948	0.269027	-0.423276	0.0806975	0.268319	-0.221183	0.19576	0.999711
ENSMUSG00000000881	Dlg3	0.102047	0.55844	0.864672	0.204216	0.40648	0.673538	-0.172325	0.320189	0.999711
ENSMUSG00000000884	Gnb1l	0.461235	0.0508776	0.401022	0.446051	0.15934	0.402566	0.285394	0.202579	0.999711
ENSMUSG00000000889	Dbh	0.450522	0.209061	0.646988	-2.964	7.65151e-08	2.70944e-06	0.429543	0.235529	0.999711
ENSMUSG00000000901	Mmp11	-0.279587	0.389731	0.778077	1.21121	0.00498831	0.0371035	-0.371892	0.223914	0.999711
ENSMUSG00000000902	Smarcb1	0.245019	0.0533289	0.405167	0.411939	0.0206342	0.106465	0.0706337	0.573652	0.999711
ENSMUSG00000000915	Hip1r	0.213296	0.256836	0.686487	-0.470239	0.0808149	0.268327	-0.0718636	0.709776	0.999711
ENSMUSG00000000916	Nsun5	0.0136962	0.95019	0.986323	0.138746	0.643571	0.840388	0.242557	0.249448	0.999711
ENSMUSG00000000934	Top1mt	-0.255416	0.283161	0.707106	0.509872	0.117524	0.336349	-0.0971287	0.67579	0.999711
ENSMUSG00000000948	Gm38393	0.303405	0.0782539	0.463002	0.26152	0.282612	0.554553	-0.122747	0.475713	0.999711
ENSMUSG00000000957	Mmp14	0.418662	0.255968	0.686083	0.568373	0.314507	0.588023	0.344152	0.362508	0.999711
ENSMUSG00000000958	Slc7a7	-0.665136	0.0545623	0.406715	0.765224	0.160157	0.403565	0.212985	0.539501	0.999711
ENSMUSG00000000959	Oxa1l	0.150279	0.394833	0.781336	0.300935	0.22781	0.490271	0.176378	0.319062	0.999711
ENSMUSG00000000976	Heatr6	-0.255888	0.170602	0.60067	0.0299455	0.909788	0.965572	0.095234	0.605382	0.999711
ENSMUSG00000000983	Wfdc18	0.91846	0.00217361	0.103232	-2.6142	1.30145e-09	7.23155e-08	0.317267	0.298712	0.999711
ENSMUSG00000001016	Ilf2	0.195411	0.201003	0.638893	0.16283	0.449029	0.706855	0.102636	0.49893	0.999711
ENSMUSG00000001017	Chtop	-0.0606235	0.794255	0.943043	0.417601	0.202947	0.458589	-0.115483	0.618276	0.999711
ENSMUSG00000001018	Snapin	0.0347481	0.8788	0.965773	-0.0203133	0.949575	0.979896	0.105276	0.642918	0.999711
ENSMUSG00000001021	S100a3	0.792222	0.0423565	0.37372	1.13622	0.038407	0.165512	0.261895	0.502922	0.999711
ENSMUSG00000001025	S100a6	-0.291699	0.361234	0.762956	-1.27989	0.0050621	0.0374542	-0.0586733	0.854737	0.999711
ENSMUSG00000001034	Mapk7	0.21161	0.363444	0.763309	-0.426262	0.196077	0.451877	-0.066557	0.77021	0.999711
ENSMUSG00000001036	Epn2	0.040849	0.746885	0.930724	-0.34874	0.0517229	0.202541	-0.126727	0.315372	0.999711
ENSMUSG00000001039	B9d1	-0.147111	0.367113	0.764949	-0.207916	0.358068	0.630338	-0.135015	0.393802	0.999711
ENSMUSG00000001052	Sec24b	0.0460956	0.754287	0.93316	-0.0717437	0.728485	0.882621	0.0312627	0.827898	0.999711
ENSMUSG00000001053	N4bp3	-0.617884	0.0485164	0.3937	2.36333	3.71216e-08	1.44558e-06	-0.360036	0.229278	0.999711
ENSMUSG00000001054	Rmnd5b	0.239042	0.121764	0.531079	-0.0756291	0.727324	0.882104	0.129353	0.396846	0.999711
ENSMUSG00000001056	Nhp2	0.203027	0.202154	0.640497	-0.0259032	0.907314	0.964317	-0.126813	0.420493	0.999711
ENSMUSG00000001062	Vps9d1	0.0612088	0.71056	0.919385	0.146534	0.531735	0.76564	0.103135	0.537856	0.999711
ENSMUSG00000001065	Zfp276	-0.541701	0.0803137	0.466596	-0.848379	0.0564052	0.213788	0.294	0.333063	0.999711
ENSMUSG00000001082	Mfsd10	0.431239	0.180767	0.614263	-0.0919483	0.83952	0.935922	0.790933	0.0158477	0.999711
ENSMUSG00000001089	Luzp1	-0.200485	0.256406	0.686278	0.0685373	0.783302	0.91165	-0.353399	0.0439456	0.999711
ENSMUSG00000001098	Kctd10	0.172021	0.54829	0.860939	-0.114904	0.780373	0.910249	-0.346429	0.240826	0.999711
ENSMUSG00000001100	Poldip2	-0.0526133	0.787596	0.940829	0.271904	0.324206	0.597903	0.0417738	0.830671	0.999711
ENSMUSG00000001103	Sebox	0.354407	0.259969	0.689692	-2.28493	4.74806e-07	1.39059e-05	0.0630412	0.831208	0.999711
ENSMUSG00000001105	Ift20	0.133298	0.430791	0.800543	0.0889547	0.708931	0.874608	0.0263243	0.875669	0.999711
ENSMUSG00000001119	Col6a1	0.36651	0.269945	0.695555	-0.9172	0.0522789	0.203412	0.940189	0.00500283	0.999711
ENSMUSG00000001120	Pcbp3	0.299482	0.161866	0.591432	0.346384	0.247218	0.512745	0.130048	0.536457	0.999711
ENSMUSG00000001123	Lgals9	-0.142197	0.629001	0.892502	0.447654	0.300491	0.573799	-0.0416449	0.888313	0.999711
ENSMUSG00000001127	Araf	0.0984033	0.612598	0.889567	0.571537	0.0374384	0.163247	0.100413	0.604726	0.999711
ENSMUSG00000001128	Cfp	-0.762225	0.104785	0.50803	-1.35101	0.0439631	0.181614	0.388071	0.386939	0.999711
ENSMUSG00000001134	Uxt	-0.241721	0.409384	0.789051	-0.0778676	0.847848	0.939469	0.0303608	0.917143	0.999711
ENSMUSG00000001138	Cnnm3	0.0305623	0.817034	0.950129	0.067925	0.721097	0.879445	0.257612	0.0524934	0.999711
ENSMUSG00000001143	Lman2l	-0.510434	0.0102748	0.21501	-0.519082	0.0650455	0.233864	-0.059602	0.763803	0.999711
ENSMUSG00000001150	Mcm3ap	-0.0258133	0.87879	0.965773	0.0156368	0.947706	0.979472	0.0745771	0.658245	0.999711
ENSMUSG00000001151	Pcnt	0.0505094	0.841443	0.95617	-0.649821	0.0742097	0.253558	0.219113	0.396772	0.999711
ENSMUSG00000001156	Mxd1	0.173762	0.353339	0.756983	0.304955	0.249152	0.515194	0.0173186	0.925227	0.999711
ENSMUSG00000001157	Gmcl1	0.338912	0.0242409	0.298667	0.305352	0.148654	0.386424	0.163431	0.269381	0.999711
ENSMUSG00000001158	Snrnp27	0.19995	0.309357	0.728675	0.39419	0.154152	0.39473	-0.139163	0.476246	0.999711
ENSMUSG00000001166	Oas1c	-0.0304926	0.939314	0.983549	-0.0885413	0.871769	0.949363	-0.27959	0.470267	0.999711
ENSMUSG00000001173	Ocrl	-0.043855	0.806439	0.946553	0.269208	0.286054	0.558287	0.103182	0.55948	0.999711
ENSMUSG00000001175	Calm1	0.147624	0.270543	0.695759	-0.372188	0.0495152	0.197079	-0.223969	0.0946884	0.999711
ENSMUSG00000001211	Agpat3	-0.0349053	0.871965	0.963606	0.20364	0.507214	0.751678	0.129776	0.550537	0.999711
ENSMUSG00000001227	Sema6b	0.0179075	0.922055	0.979184	-0.229688	0.381502	0.651105	0.28622	0.131191	0.999711
ENSMUSG00000001229	Dpp9	-0.100621	0.583497	0.875356	0.1491	0.5633	0.787555	-0.58308	0.00142656	0.999711
ENSMUSG00000001240	Ramp2	-0.359979	0.10654	0.50974	0.953363	0.00316004	0.0260093	0.30569	0.185505	0.999711
ENSMUSG00000001248	Gramd1a	0.0928207	0.56207	0.866087	-0.00646921	0.977241	0.99013	0.018949	0.906921	0.999711
ENSMUSG00000001260	Gabrg1	0.127486	0.612979	0.889851	-0.0632822	0.860704	0.944387	0.331689	0.188838	0.999711
ENSMUSG00000001270	Ckb	-0.0593815	0.808235	0.947133	0.871659	0.0119179	0.0720303	-0.0683383	0.780076	0.999711
ENSMUSG00000001280	Sp1	-0.0153377	0.943765	0.984498	0.157753	0.61865	0.826709	-0.164088	0.443264	0.999711
ENSMUSG00000001281	Itgb7	-0.228816	0.509571	0.845855	-0.495386	0.348298	0.622274	0.00831654	0.981534	0.999711
ENSMUSG00000001285	Myg1	0.0505858	0.668534	0.903678	0.234804	0.153467	0.39396	-0.0720457	0.534969	0.999711
ENSMUSG00000001288	Rarg	-0.602244	0.106933	0.510259	-0.458875	0.407817	0.67487	-0.288726	0.456626	0.999711
ENSMUSG00000001289	Pfdn5	-0.287128	0.155295	0.582326	0.0191092	0.946625	0.979284	0.145076	0.472548	0.999711
ENSMUSG00000001300	Efnb2	0.326079	0.0747556	0.453777	-0.343184	0.185055	0.43708	0.0893557	0.62431	0.999711
ENSMUSG00000001305	Rrp15	0.206852	0.436635	0.804595	0.0892339	0.79641	0.917856	0.0403109	0.859697	0.999711
ENSMUSG00000001313	Rnd2	-0.0386848	0.886136	0.969375	3.40172	5.43662e-18	1.36479e-15	-0.0385272	0.886871	0.999711
ENSMUSG00000001323	Srr	0.0827142	0.59196	0.879409	-0.693529	0.00148105	0.0142803	-0.051204	0.738181	0.999711
ENSMUSG00000001334	Fndc5	-0.440055	0.0104743	0.216541	1.5416	2.84857e-10	1.83693e-08	-0.122071	0.478029	0.999711
ENSMUSG00000001366	Fbxo9	-0.304046	0.186548	0.620658	0.363754	0.262929	0.532086	-0.270592	0.239274	0.999711
ENSMUSG00000001376	Vps50	-0.0527453	0.732119	0.925269	-0.552312	0.0109154	0.0675166	-0.0508492	0.738421	0.999711
ENSMUSG00000001380	Hars	0.338167	0.0107639	0.219303	0.0229479	0.901927	0.962083	0.101373	0.441594	0.999711
ENSMUSG00000001383	Zmat2	0.402482	0.0154292	0.248458	-0.411989	0.0788645	0.26415	0.0526939	0.750327	0.999711
ENSMUSG00000001415	Smg5	0.0176744	0.911025	0.976272	0.339208	0.129741	0.356718	0.193033	0.224712	0.999711
ENSMUSG00000001416	Cct3	0.0147208	0.927328	0.980606	0.484271	0.033711	0.151409	0.0587059	0.715687	0.999711
ENSMUSG00000001418	Glmp	0.132483	0.523189	0.85115	-0.0599485	0.838195	0.935437	-0.00419583	0.983903	0.999711
ENSMUSG00000001419	Mef2d	0.198415	0.194307	0.630119	-0.465968	0.0311339	0.142807	0.0534207	0.726016	0.999711
ENSMUSG00000001424	Snd1	0.218238	0.265041	0.692669	-0.0714989	0.796086	0.917702	0.0346278	0.859609	0.999711
ENSMUSG00000001435	Col18a1	0.721979	0.107521	0.510567	-0.585771	0.375303	0.644785	1.02421	0.0289622	0.999711
ENSMUSG00000001436	Slc19a1	0.484746	0.0681237	0.4385	-0.510524	0.176818	0.425345	0.237786	0.374363	0.999711
ENSMUSG00000001440	Kpnb1	0.0728546	0.595179	0.881404	0.130019	0.502086	0.748154	-0.0988263	0.469533	0.999711
ENSMUSG00000001441	Npepps	-0.224809	0.0908702	0.489465	0.0724921	0.699378	0.869668	-0.290092	0.0286874	0.999711
ENSMUSG00000001445	Mrpl10	0.106238	0.363693	0.763309	0.269931	0.0953117	0.296371	-0.179664	0.115666	0.999711
ENSMUSG00000001467	Cyp51	-0.196232	0.414825	0.789764	-0.18918	0.579225	0.798268	-0.086963	0.718498	0.999711
ENSMUSG00000001472	Tcf25	0.0769818	0.571639	0.87005	0.111542	0.562019	0.786856	-0.0875918	0.519641	0.999711
ENSMUSG00000001473	Tubb6	-0.133689	0.635765	0.894136	0.783807	0.0606498	0.223842	-0.363338	0.211755	0.999711
ENSMUSG00000001482	Def8	-0.161852	0.321346	0.737417	0.352083	0.126652	0.351466	-0.189898	0.244039	0.999711
ENSMUSG00000001493	Meox1	-0.0807936	0.855648	0.959777	-2.6244	4.56481e-05	0.000778788	0.717987	0.0849839	0.999711
ENSMUSG00000001506	Col1a1	-0.958277	0.266661	0.694252	0.154178	0.898145	0.960454	-0.547131	0.523629	0.999711
ENSMUSG00000001507	Itga3	-0.105435	0.772236	0.937851	0.497444	0.335735	0.608841	0.100648	0.783455	0.999711
ENSMUSG00000001508	Sgca	-0.503699	0.276179	0.70055	2.95548	2.53376e-05	0.000464401	0.300241	0.544605	0.999711
ENSMUSG00000001517	Foxm1	-0.246115	0.502058	0.84245	-1.53517	0.00322211	0.0263965	0.00177872	0.996046	0.999711
ENSMUSG00000001518	Itfg2	0.0866164	0.692908	0.915279	0.624776	0.0417885	0.175061	0.164224	0.444593	0.999711
ENSMUSG00000001520	Nrip2	-0.29027	0.160204	0.589411	1.44448	5.93331e-07	1.6919e-05	-0.152502	0.450138	0.999711
ENSMUSG00000001521	Tulp3	-0.429588	0.0271043	0.312577	-0.682817	0.0151948	0.0862716	0.16226	0.399079	0.999711
ENSMUSG00000001524	Gtf2h4	-0.180179	0.675547	0.90704	-0.570926	0.343994	0.618398	-0.376648	0.377672	0.999711
ENSMUSG00000001525	Tubb5	0.448869	0.0068859	0.182873	-0.4092	0.0810026	0.268692	-0.0990142	0.550353	0.999711
ENSMUSG00000001542	Ell2	0.0885171	0.644788	0.89702	0.167882	0.532305	0.765931	-0.28994	0.123529	0.999711
ENSMUSG00000001552	Jup	0.185486	0.23531	0.669092	0.148991	0.50215	0.748154	-0.242998	0.119199	0.999711
ENSMUSG00000001569	Nom1	0.0542617	0.749688	0.931215	0.0270265	0.909893	0.965572	0.214124	0.205009	0.999711
ENSMUSG00000001576	Ergic1	0.214099	0.244729	0.675075	0.243694	0.348838	0.62287	-0.0123164	0.9466	0.999711
ENSMUSG00000001627	Ifrd1	0.493007	0.059543	0.417734	0.156116	0.671739	0.856225	0.227525	0.38198	0.999711
ENSMUSG00000001630	Stk38l	0.00420703	0.981938	0.996167	-0.0281043	0.914685	0.967111	0.00653533	0.971744	0.999711
ENSMUSG00000001632	Brpf1	-0.0645883	0.708805	0.918715	-0.356291	0.140189	0.373814	0.147679	0.383466	0.999711
ENSMUSG00000001642	Akr1b3	-0.0532208	0.697724	0.915494	-0.0603777	0.749036	0.894187	-0.121594	0.359441	0.999711
ENSMUSG00000001663	Gstt1	-0.178403	0.562032	0.866087	-0.643016	0.144378	0.379305	-0.0213802	0.945019	0.999711
ENSMUSG00000001666	Ddt	-0.443875	0.0452689	0.382926	1.17254	0.000158839	0.00225533	-0.142631	0.516861	0.999711
ENSMUSG00000001674	Ddx18	-0.156319	0.40921	0.789051	0.168309	0.523362	0.760759	0.133771	0.471464	0.999711
ENSMUSG00000001687	Ubl3	-0.163343	0.363562	0.763309	0.797925	0.0017057	0.0158694	-0.0939677	0.60074	0.999711
ENSMUSG00000001700	Gramd3	-0.229306	0.489609	0.836627	-0.123339	0.79724	0.918354	-0.2346	0.479703	0.999711
ENSMUSG00000001707	Eef1e1	-0.0141491	0.945921	0.985165	0.938456	0.00136841	0.0134619	-0.170606	0.407903	0.999711
ENSMUSG00000001729	Akt1	0.127091	0.454338	0.81506	0.893692	0.000214531	0.00289431	0.0423299	0.806863	0.999711
ENSMUSG00000001741	Il16	-0.134011	0.664946	0.902829	-1.52658	0.00071085	0.00775263	0.556571	0.0718352	0.999711
ENSMUSG00000001750	Tcirg1	-0.778647	0.0336927	0.342283	0.14491	0.782371	0.911308	-0.0605358	0.872725	0.999711
ENSMUSG00000001751	Naglu	-0.0197126	0.927627	0.980606	-0.00127816	0.996839	0.998692	0.0483888	0.832392	0.999711
ENSMUSG00000001755	Coasy	-0.117177	0.473276	0.827232	-0.0945156	0.680722	0.861134	-0.264372	0.1051	0.999711
ENSMUSG00000001761	Smo	-0.0307685	0.928945	0.980788	-0.0837149	0.876718	0.951585	0.256526	0.478656	0.999711
ENSMUSG00000001763	Tspan33	0.185679	0.408012	0.788647	-0.967189	0.00246781	0.021559	0.309097	0.172502	0.999711
ENSMUSG00000001767	Crnkl1	0.14116	0.363711	0.763309	-0.121275	0.579511	0.798389	0.0725571	0.636586	0.999711
ENSMUSG00000001768	Rin2	0.226737	0.495231	0.83904	-0.664117	0.161067	0.40464	0.121037	0.716828	0.999711
ENSMUSG00000001774	Chordc1	-0.218754	0.443348	0.809111	0.498734	0.214659	0.473583	-0.48094	0.0899291	0.999711
ENSMUSG00000001783	Rtcb	0.329574	0.0248985	0.301693	0.320106	0.122471	0.34422	0.104076	0.477323	0.999711
ENSMUSG00000001785	Pwp1	0.52164	0.000663466	0.0609608	0.671336	0.00157513	0.0149515	0.128978	0.38264	0.999711
ENSMUSG00000001786	Fbxo7	0.0309624	0.809216	0.947204	0.011235	0.95074	0.980242	0.0511876	0.688446	0.999711
ENSMUSG00000001794	Capns1	-0.156105	0.419368	0.792131	0.199448	0.464807	0.719985	-0.14917	0.439363	0.999711
ENSMUSG00000001802	Lrp3	0.0686792	0.754571	0.93321	0.0196391	0.950059	0.980085	0.0351281	0.875764	0.999711
ENSMUSG00000001815	Evx2	-0.857442	0.00550079	0.168109	0.144652	0.748673	0.893906	0.00946524	0.976931	0.999711
ENSMUSG00000001827	Folr1	-0.234125	0.642713	0.896622	-0.0554321	0.941351	0.976859	-0.0504482	0.920699	0.999711
ENSMUSG00000001829	Clpb	0.144579	0.481633	0.832681	0.150777	0.604762	0.816297	-0.015299	0.941058	0.999711
ENSMUSG00000001833	2018-09-07	0.149245	0.296848	0.71826	-0.812157	6.09108e-05	0.000999165	-0.0708722	0.620097	0.999711
ENSMUSG00000001844	Zdhhc4	0.558871	0.00300567	0.124285	-0.0111423	0.966451	0.986565	0.428027	0.022691	0.999711
ENSMUSG00000001847	Rac1	0.16042	0.348491	0.75483	0.100551	0.677609	0.859344	-0.00697395	0.967455	0.999711
ENSMUSG00000001855	Nup214	0.168987	0.40337	0.787172	-0.249749	0.384632	0.65367	0.265527	0.19047	0.999711
ENSMUSG00000001870	Ltbp1	0.184227	0.584805	0.875652	-0.138209	0.777867	0.909686	0.230441	0.49835	0.999711
ENSMUSG00000001891	Ugp2	-0.356188	0.180765	0.614263	0.421715	0.262251	0.531309	-0.299364	0.260789	0.999711
ENSMUSG00000001901	Kcnh6	-0.098665	0.803514	0.946218	-0.993843	0.0543692	0.208422	0.035189	0.918927	0.999711
ENSMUSG00000001909	Trmt1	-0.124392	0.600563	0.884912	-0.418623	0.213302	0.472743	0.540696	0.0229802	0.999711
ENSMUSG00000001910	Nacc1	0.0692455	0.713318	0.920038	-0.0699988	0.794218	0.916948	-0.163755	0.392973	0.999711
ENSMUSG00000001911	Nfix	-0.0564972	0.763184	0.935221	-1.28502	1.45586e-06	3.7901e-05	-0.170323	0.364379	0.999711
ENSMUSG00000001924	Uba1	0.129	0.398683	0.784091	0.174877	0.417988	0.683186	0.0300997	0.843685	0.999711
ENSMUSG00000001930	Vwf	0.877224	0.191221	0.62729	0.469382	0.640298	0.838663	0.223397	0.742589	0.999711
ENSMUSG00000001942	Siae	-0.0797973	0.679568	0.910017	-0.487343	0.0750023	0.25513	-0.248104	0.198469	0.999711
ENSMUSG00000001943	Vsig2	0.484898	0.0192599	0.272546	-1.19252	0.000103102	0.00157887	0.181069	0.403817	0.999711
ENSMUSG00000001946	Esam	0.487664	0.160284	0.589552	-0.165139	0.737743	0.887224	0.192187	0.584429	0.999711
ENSMUSG00000001948	Spa17	-0.404464	0.224699	0.66095	0.400017	0.388554	0.65682	-0.251594	0.440523	0.999711
ENSMUSG00000001962	Fam50a	0.206175	0.258726	0.688887	-0.0356568	0.889029	0.955987	0.484292	0.00759555	0.999711
ENSMUSG00000001964	Emd	0.062678	0.793926	0.943043	0.312397	0.347539	0.621528	0.0825565	0.720466	0.999711
ENSMUSG00000001983	Taco1	-0.172265	0.579997	0.873773	0.702967	0.101348	0.306991	-0.777846	0.00983594	0.999711
ENSMUSG00000001985	Grik3	-0.144999	0.533545	0.855375	0.279144	0.398919	0.66627	-0.151559	0.516195	0.999711
ENSMUSG00000001986	Gria3	0.113228	0.575222	0.871532	-0.442902	0.121532	0.342864	0.0156572	0.938214	0.999711
ENSMUSG00000001988	Npas1	-0.57286	0.0683061	0.43887	3.59928	2.71928e-15	4.24752e-13	-0.110295	0.732901	0.999711
ENSMUSG00000001995	Sipa1l2	-0.0393888	0.81979	0.950647	0.404589	0.0984629	0.301502	-0.252777	0.147299	0.999711
ENSMUSG00000001998	Ap4e1	-0.831293	0.00664109	0.179539	-1.75361	5.59399e-05	0.000930654	0.177325	0.53849	0.999711
ENSMUSG00000001999	Blvra	0.0685155	0.699608	0.91617	0.439594	0.0783727	0.263222	-0.0421002	0.811951	0.999711
ENSMUSG00000002006	Pdzd4	-0.0205857	0.918481	0.978507	0.171925	0.54705	0.776834	0.262868	0.195255	0.999711
ENSMUSG00000002007	Srpk3	-0.969522	0.0270737	0.312577	-0.630934	0.308391	0.582554	0.389605	0.366824	0.999711
ENSMUSG00000002010	Idh3g	-0.168566	0.362055	0.763309	0.0889549	0.733481	0.884994	0.107618	0.560053	0.999711
ENSMUSG00000002012	Pnck	0.35352	0.0565856	0.410027	0.132941	0.611208	0.822078	0.234456	0.205342	0.999711
ENSMUSG00000002014	Ssr4	0.0547235	0.76328	0.935221	0.0281672	0.912701	0.966547	0.201432	0.268905	0.999711
ENSMUSG00000002015	Bcap31	0.0178387	0.944088	0.984498	0.238035	0.508311	0.752045	-0.0703908	0.782244	0.999711
ENSMUSG00000002017	Fam98a	-0.169032	0.293859	0.714799	0.14636	0.518187	0.758031	-0.0696209	0.663394	0.999711
ENSMUSG00000002028	Kmt2a	-0.246282	0.264364	0.692669	-0.111997	0.719779	0.879118	0.160317	0.466313	0.999711
ENSMUSG00000002031	Ift46	0.0982136	0.558987	0.864968	0.0475851	0.840162	0.936192	0.0989218	0.550579	0.999711
ENSMUSG00000002032	Tmem25	0.0770333	0.779019	0.939545	0.131282	0.735088	0.885887	-0.131138	0.632597	0.999711
ENSMUSG00000002043	Trappc6a	-0.0453758	0.824945	0.951828	-0.0203052	0.943348	0.977331	0.236086	0.276991	0.999711
ENSMUSG00000002052	Supt6	0.330644	0.0735221	0.450949	-0.0902161	0.729345	0.883357	0.147488	0.423847	0.999711
ENSMUSG00000002055	Spag5	-0.214822	0.578987	0.873233	-1.26487	0.0240591	0.11926	0.213047	0.580211	0.999711
ENSMUSG00000002058	Unc119	0.116986	0.610926	0.889152	1.96897	8.35688e-10	4.85458e-08	-0.165387	0.464973	0.999711
ENSMUSG00000002059	Rab34	-0.138276	0.591358	0.879254	0.184533	0.611341	0.822179	0.477142	0.0605286	0.999711
ENSMUSG00000002064	Sdf2	0.0692615	0.753619	0.932882	0.117626	0.706236	0.873353	0.154757	0.483671	0.999711
ENSMUSG00000002068	Ccne1	0.0742662	0.625541	0.892082	0.540211	0.0113428	0.069571	0.116916	0.444204	0.999711
ENSMUSG00000002076	Hsf2bp	0.626938	0.191404	0.627354	1.24412	0.0517156	0.202541	0.34681	0.421343	0.999711
ENSMUSG00000002083	Bbc3	0.0501591	0.905957	0.975015	0.15574	0.779314	0.910249	0.525826	0.151913	0.999711
ENSMUSG00000002100	Mybpc3	-0.408701	0.260102	0.689692	-1.15401	0.0270127	0.129077	0.417705	0.261866	0.999711
ENSMUSG00000002102	Psmc3	0.0905786	0.527478	0.852626	-0.353813	0.0807808	0.268327	0.0314598	0.826173	0.999711
ENSMUSG00000002103	Acp2	0.0316055	0.859783	0.960196	-0.166587	0.511361	0.753363	0.223273	0.213061	0.999711
ENSMUSG00000002104	Rapsn	-0.167213	0.593468	0.880061	2.57938	1.09389e-09	6.20079e-08	-0.0870551	0.770065	0.999711
ENSMUSG00000002105	Slc39a13	-0.55355	0.00909879	0.205736	1.15518	0.000130526	0.00191738	-0.219712	0.30861	0.999711
ENSMUSG00000002107	Celf2	-0.00278189	0.984674	0.996457	-0.291992	0.154126	0.39473	0.0118381	0.934765	0.999711
ENSMUSG00000002108	Nr1h3	-0.924276	0.00377671	0.142723	0.937815	0.0466149	0.189232	-0.777595	0.0166347	0.999711
ENSMUSG00000002109	Ddb2	-0.752928	0.0519834	0.404196	-1.26394	0.0186417	0.0996444	0.41845	0.247036	0.999711
ENSMUSG00000002129	Sf3a1	-0.0237672	0.867691	0.962608	0.206139	0.304381	0.578242	-0.0113333	0.935796	0.999711
ENSMUSG00000002147	Stat6	-0.0550022	0.829372	0.952981	-0.0996657	0.785497	0.912454	-0.244403	0.34129	0.999711
ENSMUSG00000002190	Clgn	0.101664	0.583978	0.875356	0.375315	0.158196	0.400851	0.0151361	0.935593	0.999711
ENSMUSG00000002205	Vrk3	-0.089975	0.528196	0.853394	0.227876	0.257988	0.525774	-0.0505604	0.728571	0.999711
ENSMUSG00000002210	Smg9	-0.070879	0.739659	0.928428	-0.386883	0.196053	0.451877	0.0417736	0.843187	0.999711
ENSMUSG00000002221	Paxip1	0.168881	0.198723	0.636274	-0.248237	0.185798	0.438247	0.147803	0.268987	0.999711
ENSMUSG00000002222	Rmnd5a	-0.0617694	0.661366	0.902057	0.421474	0.0344183	0.153751	-0.115038	0.412056	0.999711
ENSMUSG00000002227	Mov10	-0.0490455	0.92323	0.979184	-0.909117	0.212889	0.472049	0.258811	0.602709	0.999711
ENSMUSG00000002233	Rhoc	-0.140499	0.685599	0.913491	0.0382299	0.939671	0.97641	-0.146081	0.681514	0.999711
ENSMUSG00000002250	Ppard	-0.336504	0.202378	0.640847	-0.391449	0.306232	0.580034	-0.120871	0.665342	0.999711
ENSMUSG00000002257	Def6	0.0274995	0.949266	0.985899	1.29787	0.0336993	0.151409	0.213875	0.651077	0.999711
ENSMUSG00000002265	Peg3	-0.066281	0.711454	0.919385	0.494005	0.0510106	0.20087	0.0213204	0.904853	0.999711
ENSMUSG00000002279	Lmf1	-0.118726	0.574618	0.871532	-0.44791	0.138274	0.370895	0.0478098	0.824334	0.999711
ENSMUSG00000002280	Narfl	-0.13186	0.493074	0.837884	0.0595912	0.822128	0.92908	0.134532	0.470322	0.999711
ENSMUSG00000002289	Angptl4	-0.134086	0.73798	0.928073	-0.11604	0.853857	0.942522	0.404182	0.310105	0.999711
ENSMUSG00000002297	Dbf4	-0.0105165	0.974628	0.993524	-0.145832	0.753416	0.896523	-0.0165937	0.95787	0.999711
ENSMUSG00000002307	Daxx	0.0679771	0.749316	0.931215	0.27874	0.348933	0.622895	-0.0933284	0.659294	0.999711
ENSMUSG00000002308	Cd320	-0.0296384	0.8973	0.972293	-0.147457	0.650617	0.84472	0.0791482	0.733115	0.999711
ENSMUSG00000002319	Ipo4	0.260785	0.136196	0.559676	0.28476	0.248679	0.514485	-0.0421626	0.809688	0.999711
ENSMUSG00000002320	Tm9sf1	0.253606	0.326725	0.739605	0.103463	0.777141	0.909133	0.12441	0.629818	0.999711
ENSMUSG00000002324	Rec8	0.006869	0.984228	0.996419	2.47555	4.09988e-07	1.23949e-05	0.153319	0.658525	0.999711
ENSMUSG00000002325	Irf9	-0.183364	0.413688	0.789507	-0.484944	0.133397	0.362866	0.33577	0.130131	0.999711
ENSMUSG00000002326	Gmpr2	-0.287298	0.0564314	0.410027	0.0978816	0.643097	0.840142	-0.0198469	0.894296	0.999711
ENSMUSG00000002329	Mdp1	0.178893	0.198625	0.636274	-0.422228	0.0304188	0.140413	0.0519128	0.705147	0.999711
ENSMUSG00000002332	Dhrs1	-0.0580574	0.784435	0.940687	0.153587	0.608579	0.819091	0.0117598	0.955797	0.999711
ENSMUSG00000002341	Ncan	0.664932	0.0598885	0.418407	-1.02294	0.0403375	0.170986	0.02827	0.935962	0.999711
ENSMUSG00000002342	Tmem161a	0.00981699	0.968012	0.991619	-0.10292	0.767537	0.903924	-0.0302033	0.903791	0.999711
ENSMUSG00000002343	Armc6	0.173479	0.417442	0.79117	-0.330527	0.271915	0.543058	-0.177395	0.404386	0.999711
ENSMUSG00000002345	Borcs8	-0.0321495	0.843318	0.956772	0.20331	0.3723	0.642419	-0.225332	0.162145	0.999711
ENSMUSG00000002346	Slc25a42	0.0378873	0.835149	0.954465	-0.42758	0.094316	0.294512	0.0733747	0.676131	0.999711
ENSMUSG00000002365	Snx9	-0.130447	0.650429	0.898451	0.618513	0.142858	0.377642	-0.31952	0.282206	0.999711
ENSMUSG00000002372	Ranbp3	0.0635851	0.7196	0.922558	-0.0503325	0.839046	0.935585	-0.0453571	0.795207	0.999711
ENSMUSG00000002379	Ndufa11	-0.0458633	0.800549	0.945778	0.479403	0.0617003	0.226176	0.00313721	0.986207	0.999711
ENSMUSG00000002393	Nr2f6	0.0902266	0.693244	0.915279	0.393909	0.235982	0.499167	0.0612997	0.808455	0.999711
ENSMUSG00000002395	Use1	-0.105206	0.462724	0.820579	0.362387	0.0730201	0.251059	0.0619094	0.665771	0.999711
ENSMUSG00000002396	Ocel1	-0.383587	0.103776	0.506661	-0.994334	0.00325998	0.0266291	-0.0589497	0.808865	0.999711
ENSMUSG00000002409	Dyrk1b	-0.190196	0.489963	0.836869	-0.158477	0.677025	0.858914	0.0406122	0.884969	0.999711
ENSMUSG00000002413	Braf	0.318489	0.170258	0.600625	-0.389109	0.235851	0.499167	0.110542	0.632903	0.999711
ENSMUSG00000002416	Ndufb2	-0.404808	0.0342242	0.345635	0.404059	0.131411	0.359692	-0.112644	0.551932	0.999711
ENSMUSG00000002428	Hltf	-0.317281	0.10923	0.514013	0.0994158	0.721919	0.879745	-0.346	0.0763752	0.999711
ENSMUSG00000002455	Prpf6	0.131218	0.463882	0.82107	0.209837	0.405926	0.673243	0.0892511	0.617906	0.999711
ENSMUSG00000002458	Rgs19	0.0876126	0.689232	0.913918	-0.7482	0.0146789	0.0841926	-0.194072	0.366386	0.999711
ENSMUSG00000002459	Rgs20	-0.16304	0.479685	0.832201	0.727655	0.0255435	0.123995	-0.209965	0.360362	0.999711
ENSMUSG00000002475	Abhd3	-0.124627	0.548609	0.860939	0.389459	0.187962	0.44101	0.0569956	0.784663	0.999711
ENSMUSG00000002477	Snrpd1	0.293572	0.125363	0.537796	0.75021	0.00518431	0.0381376	-0.100389	0.596538	0.999711
ENSMUSG00000002486	Tchp	-0.192894	0.40837	0.788855	0.416818	0.212069	0.471422	0.248179	0.290462	0.999711
ENSMUSG00000002489	Tiam1	0.178352	0.356489	0.758861	0.630415	0.0207574	0.107007	0.14302	0.456761	0.999711
ENSMUSG00000002496	Tsc2	0.0765865	0.587321	0.877016	0.0687426	0.731001	0.884316	0.0457917	0.746637	0.999711
ENSMUSG00000002504	Slc9a3r2	-0.121507	0.563054	0.866778	1.53572	2.60743e-07	8.1456e-06	-0.247848	0.23931	0.999711
ENSMUSG00000002524	Puf60	0.0016643	0.993206	0.998665	0.209893	0.446139	0.704682	-0.101243	0.602882	0.999711
ENSMUSG00000002546	Golga2	0.0232436	0.887109	0.969375	0.195312	0.397502	0.664931	0.042647	0.793977	0.999711
ENSMUSG00000002550	Uck1	0.000448782	0.998354	0.999556	-0.2979	0.327062	0.600162	-0.00651995	0.975803	0.999711
ENSMUSG00000002578	Ikzf4	0.0892638	0.578389	0.872893	-0.466627	0.0451477	0.18504	0.149536	0.350783	0.999711
ENSMUSG00000002580	Mien1	-0.201628	0.315574	0.733885	0.225285	0.425928	0.688805	-0.231857	0.246963	0.999711
ENSMUSG00000002602	Axl	-0.0596637	0.890268	0.970426	0.0134892	0.982552	0.992293	0.121566	0.78019	0.999711
ENSMUSG00000002608	Ccdc97	-0.171896	0.369349	0.765826	0.357451	0.184653	0.436278	-0.248727	0.195675	0.999711
ENSMUSG00000002617	Zfp40	-0.0240822	0.925327	0.979692	-0.308189	0.392578	0.660229	0.0312655	0.90028	0.999711
ENSMUSG00000002625	Akap8l	-0.394259	0.213851	0.651689	-1.06925	0.0171477	0.0943091	0.218879	0.488552	0.999711
ENSMUSG00000002633	Shh	-0.162461	0.591729	0.879337	1.04243	0.0146655	0.0841503	-0.283473	0.421695	0.999711
ENSMUSG00000002635	Pdcd2l	0.260632	0.166062	0.594321	-0.0168394	0.948725	0.979635	0.229972	0.208387	0.999711
ENSMUSG00000002658	Gtf2f1	0.33076	0.0541632	0.40602	-0.0857953	0.722058	0.879824	0.22584	0.186643	0.999711
ENSMUSG00000002660	Clpp	-0.252787	0.0975647	0.499534	0.818266	0.000141001	0.00205196	-0.178931	0.23928	0.999711
ENSMUSG00000002661	Alkbh7	-0.166436	0.437125	0.805071	0.434907	0.139154	0.372474	-0.341519	0.120416	0.999711
ENSMUSG00000002679	Med6	0.307289	0.0618843	0.422207	0.316273	0.166271	0.411375	0.0492114	0.758135	0.999711
ENSMUSG00000002688	Prkd1	-0.0812869	0.777358	0.939519	0.480205	0.249168	0.515194	-0.00871902	0.976237	0.999711
ENSMUSG00000002699	Lcp2	-0.461155	0.141133	0.567641	-0.859172	0.0570536	0.21526	-0.0546485	0.859622	0.999711
ENSMUSG00000002718	Cse1l	0.0134959	0.936122	0.983214	-0.0928838	0.695217	0.869035	-0.00290437	0.98609	0.999711
ENSMUSG00000002728	Naa20	0.245665	0.129041	0.545867	0.594375	0.0085278	0.0560991	-0.0598907	0.706707	0.999711
ENSMUSG00000002731	Prkra	-0.112741	0.564625	0.867554	1.16896	1.92603e-05	0.000369387	-0.249421	0.199607	0.999711
ENSMUSG00000002732	Fkbp7	0.514567	0.0688029	0.440622	1.02787	0.0115715	0.0705737	0.187045	0.515731	0.999711
ENSMUSG00000002733	Plekha3	-0.00982217	0.957491	0.9885	0.600609	0.0204978	0.105901	-0.00251389	0.98892	0.999711
ENSMUSG00000002741	Ykt6	0.13231	0.516628	0.848255	-0.549104	0.0566843	0.2145	0.0144376	0.943459	0.999711
ENSMUSG00000002748	Baz1b	-0.384689	0.052406	0.404196	0.208996	0.455694	0.712328	-0.197748	0.31817	0.999711
ENSMUSG00000002763	Pex6	-0.541904	0.0209729	0.28211	0.13211	0.690785	0.866362	-0.447746	0.0677005	0.999711
ENSMUSG00000002767	Mrpl2	0.185829	0.358569	0.760641	-0.033457	0.905458	0.963871	0.104745	0.5987	0.999711
ENSMUSG00000002768	Mea1	-0.0146631	0.926214	0.979886	0.259334	0.243729	0.508813	-0.246267	0.117916	0.999711
ENSMUSG00000002769	Gnmt	1.7713	0.00575726	0.170242	0.175837	0.843075	0.937728	1.68918	0.00496138	0.999711
ENSMUSG00000002771	Grin2d	-0.522121	0.0209212	0.281985	0.807832	0.012168	0.0731954	0.0347118	0.882097	0.999711
ENSMUSG00000002778	Kdelr1	0.20354	0.292879	0.714139	0.543565	0.047182	0.190818	0.0122775	0.949707	0.999711
ENSMUSG00000002781	Tmem143	-0.410406	0.0517315	0.403351	-0.423264	0.148252	0.385735	0.0508278	0.806756	0.999711
ENSMUSG00000002797	Ggct	-0.125817	0.405496	0.787834	0.242579	0.247995	0.513676	-0.247575	0.0947471	0.999711
ENSMUSG00000002799	Jag2	-0.112134	0.735874	0.926798	-0.516936	0.290792	0.563497	0.448359	0.210178	0.999711
ENSMUSG00000002803	Btbd6	-0.0814569	0.675442	0.90704	0.0339854	0.90143	0.961747	0.0244474	0.899737	0.999711
ENSMUSG00000002804	Nudt14	0.0280761	0.863921	0.961763	-0.086812	0.699935	0.87001	-0.157254	0.359953	0.999711
ENSMUSG00000002808	Epdr1	0.0247207	0.902915	0.974524	0.153556	0.592126	0.807607	-0.256623	0.206559	0.999711
ENSMUSG00000002812	Flii	-0.151981	0.445077	0.809433	0.803707	0.00429147	0.032913	-0.09989	0.61776	0.999711
ENSMUSG00000002814	Top3a	0.253957	0.42513	0.79697	-0.404619	0.364838	0.635315	0.508756	0.0916775	0.999711
ENSMUSG00000002820	Atg4d	-0.399482	0.0323553	0.337889	-0.0461553	0.855184	0.942546	0.068116	0.717144	0.999711
ENSMUSG00000002825	Qtrt1	-0.0415837	0.829469	0.952981	-0.283325	0.287331	0.559489	0.225975	0.219912	0.999711
ENSMUSG00000002833	Hdgfrp2	0.22672	0.237996	0.671813	0.227672	0.392719	0.660389	0.307974	0.102714	0.999711
ENSMUSG00000002835	Chaf1a	0.270952	0.43243	0.80117	-0.709255	0.143487	0.378452	0.085143	0.801167	0.999711
ENSMUSG00000002844	Adprh	0.320123	0.0758545	0.456574	0.411069	0.10663	0.316781	-0.0728126	0.68745	0.999711
ENSMUSG00000002845	Tmem39a	-0.334028	0.230887	0.667682	-0.266178	0.496636	0.744716	0.076614	0.773805	0.999711
ENSMUSG00000002846	Timmdc1	0.348663	0.369494	0.765902	-0.252433	0.645097	0.841182	-0.356288	0.358149	0.999711
ENSMUSG00000002870	Mcm2	-0.353024	0.207262	0.646126	-0.810551	0.0391464	0.167781	-0.145468	0.599441	0.999711
ENSMUSG00000002871	Tpra1	0.0279725	0.91983	0.979184	0.194074	0.621069	0.827661	-0.195308	0.484592	0.999711
ENSMUSG00000002881	Nab1	-0.14858	0.512356	0.847576	-0.342075	0.288408	0.560653	-0.00771151	0.972913	0.999711
ENSMUSG00000002885	Adgre5	-0.179038	0.709644	0.91888	-1.16005	0.108224	0.319423	0.244843	0.621369	0.999711
ENSMUSG00000002897	Il17ra	-0.269236	0.280689	0.704739	-1.62256	2.30235e-05	0.000430405	-0.349288	0.174719	0.999711
ENSMUSG00000002900	Lamb1	-0.00998476	0.969691	0.991989	0.630638	0.0916143	0.289419	0.287634	0.276267	0.999711
ENSMUSG00000002908	Kcnn1	-0.028437	0.86759	0.962608	-0.647238	0.00793984	0.0530757	-0.0727783	0.684632	0.999711
ENSMUSG00000002910	Arrdc2	0.691458	0.0743591	0.452789	-0.371429	0.496573	0.744701	0.613794	0.106448	0.999711
ENSMUSG00000002930	Ppp1r17	3.30344	0.00250722	0.11297	1.75864	0.21452	0.473552	2.47322	0.0184698	0.999711
ENSMUSG00000002944	Cd36	0.759779	0.0985899	0.501383	-0.0666474	0.916861	0.967746	0.0434726	0.924267	0.999711
ENSMUSG00000002948	Map2k7	0.0866505	0.616694	0.890621	0.433645	0.0760489	0.257675	0.263291	0.129186	0.999711
ENSMUSG00000002949	Timm44	-0.216355	0.184048	0.617832	-0.0286846	0.899872	0.96113	0.271973	0.0904517	0.999711
ENSMUSG00000002957	Ap2a2	0.296299	0.0730817	0.450127	-0.130402	0.57662	0.796859	0.0621595	0.706581	0.999711
ENSMUSG00000002963	Pnkp	-0.0067162	0.974524	0.993524	-0.373448	0.204815	0.46113	0.337453	0.105956	0.999711
ENSMUSG00000002968	Med25	0.196267	0.512626	0.847724	-0.164104	0.702852	0.871544	0.36615	0.246516	0.999711
ENSMUSG00000002980	Bcam	-0.345401	0.466192	0.822105	-0.01839	0.981949	0.992244	0.230808	0.693442	0.999711
ENSMUSG00000002981	Clptm1	-0.00383504	0.98505	0.996457	-0.0036817	0.989875	0.995221	0.00761763	0.970673	0.999711
ENSMUSG00000002983	Relb	0.332159	0.252386	0.681696	-0.442841	0.273064	0.544215	-0.00474859	0.98677	0.999711
ENSMUSG00000002984	Tomm40	-0.267356	0.136744	0.560615	0.0894415	0.71994	0.879162	0.0011375	0.994839	0.999711
ENSMUSG00000002985	Apoe	-0.305459	0.522875	0.85115	0.123005	0.855601	0.942711	0.43227	0.366492	0.999711
ENSMUSG00000002996	Hbp1	0.112156	0.504888	0.843361	0.0603076	0.800387	0.920292	0.0976299	0.558524	0.999711
ENSMUSG00000002997	Prkar2b	-0.204185	0.357809	0.760274	0.742594	0.0176486	0.0957967	-0.2186	0.32089	0.999711
ENSMUSG00000003031	Cdkn1b	1.1982	0.00483174	0.156501	0.717323	0.226865	0.489377	0.151227	0.717884	0.999711
ENSMUSG00000003033	Ap1m1	0.145599	0.535118	0.855679	0.0910116	0.783108	0.911629	-0.0757864	0.744985	0.999711
ENSMUSG00000003037	Rab8a	0.252805	0.0703449	0.444054	0.259313	0.186893	0.439445	-0.107972	0.436367	0.999711
ENSMUSG00000003038	Hmgn2	0.543664	0.0539927	0.405791	0.231399	0.554684	0.782671	0.180031	0.511952	0.999711
ENSMUSG00000003039	Fam32a	-0.15768	0.204102	0.643911	-0.0560628	0.747843	0.893446	-0.214849	0.0813996	0.999711
ENSMUSG00000003062	Stard3nl	0.198559	0.343853	0.751627	-0.235544	0.426727	0.689532	0.035834	0.864363	0.999711
ENSMUSG00000003068	Stk11	-0.019321	0.931541	0.98144	0.414341	0.192686	0.447955	-0.25855	0.254289	0.999711
ENSMUSG00000003070	Efna2	0.196237	0.477849	0.831079	-0.899035	0.0250828	0.122393	0.203069	0.502565	0.999711
ENSMUSG00000003072	Atp5d	-0.0273123	0.882255	0.967416	0.223325	0.390832	0.658996	-0.157878	0.391711	0.999711
ENSMUSG00000003099	Ppp5c	0.168398	0.281797	0.705899	-0.649492	0.00286951	0.0240977	0.0924675	0.544977	0.999711
ENSMUSG00000003119	Cdk12	-0.481355	0.025789	0.304913	-0.621205	0.0400773	0.170265	0.146352	0.48355	0.999711
ENSMUSG00000003123	Lipe	-0.354185	0.422904	0.795129	-0.105827	0.867197	0.94724	0.233636	0.593858	0.999711
ENSMUSG00000003131	Pafah1b2	0.196388	0.198079	0.635245	0.240712	0.262912	0.532086	-0.0964698	0.524542	0.999711
ENSMUSG00000003134	Tbc1d8	0.175365	0.454471	0.81506	1.35802	3.72743e-05	0.000653198	-0.0339022	0.882899	0.999711
ENSMUSG00000003135	Cnot11	0.119742	0.531549	0.854298	0.0148539	0.954659	0.981181	-0.0709406	0.698098	0.999711
ENSMUSG00000003153	Slc2a3	0.46798	0.0131826	0.232156	-0.147831	0.579166	0.798268	0.268789	0.154049	0.999711
ENSMUSG00000003154	Foxj2	0.0594055	0.659818	0.901782	-0.0874309	0.646258	0.841939	0.00377157	0.977483	0.999711
ENSMUSG00000003161	Sri	-0.257338	0.136847	0.560873	-0.64482	0.00836624	0.0553471	-0.08398	0.627803	0.999711
ENSMUSG00000003166	Dgcr2	0.269682	0.0848297	0.480211	0.0385884	0.861797	0.944387	0.251396	0.109712	0.999711
ENSMUSG00000003184	Irf3	-1.02902	0.000583676	0.0579985	-0.244606	0.560337	0.785444	-0.359985	0.222843	0.999711
ENSMUSG00000003198	Zfp959	0.400051	0.15275	0.578094	0.472594	0.221855	0.482121	-0.0673515	0.800223	0.999711
ENSMUSG00000003199	Mpnd	0.0261243	0.895101	0.971869	0.534906	0.0561133	0.213127	-0.244898	0.22126	0.999711
ENSMUSG00000003200	Sh3gl1	0.253147	0.129128	0.545867	-0.0361525	0.876763	0.951585	-0.0663253	0.686275	0.999711
ENSMUSG00000003206	Ebi3	0.156654	0.688581	0.913918	0.477662	0.359367	0.631409	0.210071	0.553768	0.999711
ENSMUSG00000003208	Ccdc94	-0.433193	0.185413	0.619719	0.0983187	0.824601	0.92982	0.0413307	0.887641	0.999711
ENSMUSG00000003226	Ranbp2	0.0184216	0.918875	0.978825	-0.0707894	0.782693	0.911381	0.160298	0.376766	0.999711
ENSMUSG00000003228	Grk5	-0.232568	0.41349	0.789507	0.0767606	0.848772	0.940048	-0.595728	0.0387061	0.999711
ENSMUSG00000003233	Dvl3	0.198704	0.352742	0.756983	0.663741	0.025996	0.125327	-0.0688852	0.739957	0.999711
ENSMUSG00000003234	Abcf3	0.146185	0.444398	0.809319	0.133868	0.619415	0.826862	0.200356	0.29236	0.999711
ENSMUSG00000003235	Eif2b5	-0.117039	0.468805	0.824425	-0.0086837	0.969645	0.9874	0.00914557	0.95488	0.999711
ENSMUSG00000003269	Cyth2	0.407903	0.0222119	0.289125	-0.192411	0.442642	0.701914	0.0367794	0.836144	0.999711
ENSMUSG00000003271	Sult2b1	0.646666	0.00125614	0.0776442	-0.97711	0.000494721	0.00577161	-0.132258	0.506231	0.999711
ENSMUSG00000003273	Car11	-0.257054	0.142169	0.569239	0.0821775	0.739954	0.888399	-0.171362	0.335073	0.999711
ENSMUSG00000003279	Dlgap1	0.21787	0.278022	0.702689	-0.100016	0.724765	0.880959	-0.0879962	0.661308	0.999711
ENSMUSG00000003283	Hck	-0.583386	0.172107	0.602759	0.208267	0.74179	0.889388	-0.216205	0.622373	0.999711
ENSMUSG00000003299	Mrpl4	-0.00896204	0.954744	0.987409	0.0428529	0.845505	0.93902	-0.0358941	0.816942	0.999711
ENSMUSG00000003308	Keap1	-0.0688982	0.711011	0.919385	-0.168069	0.524033	0.761006	0.143951	0.446316	0.999711
ENSMUSG00000003309	Ap1m2	0.384081	0.342901	0.751212	-1.36935	0.0093796	0.06043	0.407402	0.216443	0.999711
ENSMUSG00000003316	Glg1	-0.0927351	0.66421	0.902519	-0.0825346	0.784897	0.912454	0.00719508	0.973157	0.999711
ENSMUSG00000003344	Btbd2	0.0113142	0.950682	0.986517	0.402309	0.11965	0.340083	-0.195606	0.288621	0.999711
ENSMUSG00000003345	Csnk1g2	-0.186318	0.423307	0.795461	-0.345497	0.297347	0.570722	-0.217814	0.361351	0.999711
ENSMUSG00000003346	Abhd17a	-0.0951302	0.622698	0.890891	-0.283778	0.300616	0.573959	-0.00743275	0.969779	0.999711
ENSMUSG00000003348	Mob3a	0.47632	0.280932	0.704861	0.086305	0.895586	0.95852	-0.17144	0.7096	0.999711
ENSMUSG00000003352	Cacnb3	-0.134045	0.419197	0.792131	-0.706586	0.00273722	0.0232366	-0.0371738	0.824333	0.999711
ENSMUSG00000003354	Ccdc65	0.230733	0.286348	0.708753	-0.370802	0.209924	0.468281	-0.112022	0.581314	0.999711
ENSMUSG00000003355	Fkbp11	-0.486059	0.057435	0.412186	1.00427	0.00713261	0.0490267	0.529911	0.0844386	0.999711
ENSMUSG00000003360	Ddx23	-0.25775	0.244854	0.675198	-0.0819849	0.792538	0.91598	0.248825	0.266043	0.999711
ENSMUSG00000003363	Pld3	0.410613	0.146922	0.573706	-0.948851	0.0178573	0.0967016	0.30752	0.27709	0.999711
ENSMUSG00000003378	Grik5	-0.0548847	0.780579	0.939751	-0.192309	0.495406	0.743763	0.337752	0.093421	0.999711
ENSMUSG00000003380	Rabac1	0.267586	0.152436	0.578085	0.194844	0.46092	0.716458	0.0900222	0.631335	0.999711
ENSMUSG00000003382	Etv3	0.235515	0.168733	0.597644	0.00275894	0.99088	0.995625	0.10205	0.538005	0.999711
ENSMUSG00000003402	Prkcsh	-0.105752	0.663781	0.902487	0.209045	0.544336	0.774951	-0.0370492	0.880395	0.999711
ENSMUSG00000003410	Elavl3	-0.12483	0.433592	0.80201	0.328125	0.14534	0.380709	-0.233465	0.14301	0.999711
ENSMUSG00000003411	Rab3b	-0.0274009	0.901132	0.9738	2.47968	4.1654e-15	6.36491e-13	0.0945094	0.667327	0.999711
ENSMUSG00000003418	St8sia6	0.557126	0.130743	0.548979	2.24443	3.37697e-05	0.00059715	0.0999761	0.775952	0.999711
ENSMUSG00000003420	Fcgrt	-0.201474	0.607997	0.889108	0.798157	0.165231	0.410342	-0.247398	0.535499	0.999711
ENSMUSG00000003421	Nosip	0.430756	0.012884	0.229852	0.298876	0.215976	0.47425	-0.0320093	0.850718	0.999711
ENSMUSG00000003423	Pih1d1	0.0496542	0.727255	0.923903	-0.645676	0.00115036	0.0116177	0.0203446	0.885992	0.999711
ENSMUSG00000003429	Rps11	-0.345106	0.115134	0.52245	0.183482	0.55321	0.781864	0.0634703	0.771877	0.999711
ENSMUSG00000003435	Supt5	0.124516	0.438011	0.805313	-0.0196545	0.930866	0.972464	0.0752544	0.638221	0.999711
ENSMUSG00000003436	Dll3	-0.148501	0.675439	0.90704	-0.263794	0.557965	0.783526	0.216265	0.512235	0.999711
ENSMUSG00000003437	Paf1	0.354997	0.0612188	0.421208	-0.0959499	0.719643	0.879028	0.211311	0.264522	0.999711
ENSMUSG00000003438	Timm50	-0.180641	0.319989	0.736239	0.119129	0.640976	0.83892	-0.199917	0.277317	0.999711
ENSMUSG00000003444	Med29	-0.0834753	0.725699	0.923903	0.235875	0.458793	0.714886	-0.414756	0.0639611	0.999711
ENSMUSG00000003452	Bicd1	0.00821824	0.963441	0.98999	-0.258593	0.307304	0.581046	0.00593222	0.973318	0.999711
ENSMUSG00000003458	Ncstn	0.254795	0.243873	0.674774	-0.209253	0.49847	0.745954	0.292034	0.181824	0.999711
ENSMUSG00000003464	Pex19	0.335974	0.0760617	0.457151	0.205282	0.442722	0.701914	0.0346236	0.854703	0.999711
ENSMUSG00000003469	Phyhip	0.290177	0.157918	0.585095	0.0285478	0.921612	0.969639	-0.128812	0.530085	0.999711
ENSMUSG00000003476	Crhr2	-0.0754312	0.814975	0.949268	1.35455	0.00314937	0.0259366	0.327456	0.366665	0.999711
ENSMUSG00000003500	Impdh1	0.0897429	0.586946	0.876957	0.386632	0.09035	0.287061	-0.432839	0.00815837	0.999711
ENSMUSG00000003518	Dusp3	0.322435	0.338313	0.748152	-0.93781	0.0491808	0.196249	-0.346415	0.303656	0.999711
ENSMUSG00000003526	Prodh	-0.248987	0.625685	0.892082	-1.42136	0.0527986	0.204813	0.244188	0.634223	0.999711
ENSMUSG00000003527	Dgcr14	0.377287	0.0293311	0.323366	0.0078836	0.973524	0.989502	0.107011	0.525034	0.999711
ENSMUSG00000003528	Slc25a1	-0.0344477	0.880077	0.966497	0.326313	0.312732	0.586653	-0.347509	0.129864	0.999711
ENSMUSG00000003531	Dgcr6	0.0946942	0.5759	0.871786	-0.326281	0.170882	0.41759	-0.0317009	0.851237	0.999711
ENSMUSG00000003534	Ddr1	-0.16839	0.367583	0.765238	-0.192481	0.47698	0.729084	-0.00358767	0.984925	0.999711
ENSMUSG00000003541	Ier3	0.429289	0.139957	0.566727	0.200515	0.623231	0.828453	-0.0062392	0.982934	0.999711
ENSMUSG00000003545	Fosb	0.261091	0.551191	0.862599	-0.804265	0.192173	0.447278	0.0248172	0.953865	0.999711
ENSMUSG00000003546	Klc4	-0.296095	0.26133	0.690689	0.740954	0.0470276	0.190389	-0.118204	0.670622	0.999711
ENSMUSG00000003549	Ercc1	0.0260329	0.861135	0.960394	0.166062	0.414414	0.680506	-0.146007	0.306893	0.999711
ENSMUSG00000003559	As3mt	-0.394849	0.235198	0.669092	1.59071	0.000959998	0.00999678	-0.30446	0.3644	0.999711
ENSMUSG00000003573	Homer3	0.241872	0.627842	0.892364	-0.83855	0.242654	0.507171	0.788238	0.120037	0.999711
ENSMUSG00000003575	Crtc1	0.180584	0.650722	0.898451	-0.210608	0.709138	0.874709	-0.154896	0.698753	0.999711
ENSMUSG00000003581	Rnf215	-0.0248546	0.90808	0.97528	0.107464	0.726041	0.881254	0.0979351	0.655133	0.999711
ENSMUSG00000003585	Sec14l2	-0.154055	0.469112	0.824554	-0.187251	0.53344	0.766861	0.218033	0.304796	0.999711
ENSMUSG00000003604	Aven	-0.0665607	0.758903	0.934281	-0.104062	0.728459	0.882621	0.00154712	0.994092	0.999711
ENSMUSG00000003617	Cp	0.526787	0.198727	0.636274	1.87211	0.00183914	0.0168764	0.346307	0.403322	0.999711
ENSMUSG00000003623	Crot	-0.231441	0.383747	0.776004	-0.102398	0.78619	0.912531	0.0892314	0.737513	0.999711
ENSMUSG00000003644	Rps6ka1	-0.391918	0.230877	0.667682	0.463587	0.319798	0.594248	0.00451399	0.989093	0.999711
ENSMUSG00000003657	Calb2	0.34445	0.252208	0.681696	2.42691	1.51148e-08	6.24953e-07	0.685741	0.0221401	0.999711
ENSMUSG00000003660	Snrnp200	0.0127607	0.944046	0.984498	-0.105798	0.680533	0.86111	0.135807	0.45446	0.999711
ENSMUSG00000003662	Ciao1	0.212859	0.165399	0.593933	0.344297	0.110581	0.323125	-0.146216	0.336241	0.999711
ENSMUSG00000003665	Has1	0.300591	0.446353	0.809524	1.00389	0.0642301	0.231829	0.509898	0.188145	0.999711
ENSMUSG00000003680	Taf6l	-0.202788	0.276419	0.700921	-0.0511499	0.845325	0.938894	0.158318	0.392545	0.999711
ENSMUSG00000003721	Insig2	-0.107167	0.612477	0.889567	0.407662	0.172737	0.419837	-0.124782	0.555008	0.999711
ENSMUSG00000003731	Kpna6	-0.038014	0.806436	0.946553	0.112839	0.607338	0.818126	-0.0848814	0.585087	0.999711
ENSMUSG00000003746	Man1a	0.10949	0.621615	0.890863	0.317976	0.312258	0.586442	-0.0446835	0.839668	0.999711
ENSMUSG00000003752	Itpkc	0.0848506	0.674848	0.90704	0.361701	0.194632	0.450171	-0.0773893	0.688551	0.999711
ENSMUSG00000003762	Coq8b	0.0462803	0.817054	0.950129	-0.291896	0.300857	0.574264	-0.221	0.271583	0.999711
ENSMUSG00000003778	Brd8	0.244906	0.289553	0.712576	-0.262312	0.421774	0.685943	0.244255	0.289072	0.999711
ENSMUSG00000003779	Kif20a	-0.194733	0.655641	0.90039	-0.66157	0.288685	0.561086	0.000397871	0.999196	0.999972
ENSMUSG00000003808	Farsa	0.287719	0.0821345	0.472336	-0.0774924	0.737836	0.887224	0.250969	0.123041	0.999711
ENSMUSG00000003809	Gcdh	-0.149315	0.376673	0.770896	-0.0163082	0.945636	0.978705	0.0578127	0.731978	0.999711
ENSMUSG00000003810	Mast2	-0.0859653	0.554424	0.864272	-0.0569616	0.782604	0.911353	-0.0579191	0.692754	0.999711
ENSMUSG00000003812	Dnase2a	-0.137153	0.4517	0.814023	-0.0861402	0.743709	0.890709	0.187801	0.313554	0.999711
ENSMUSG00000003813	Rad23a	0.170352	0.257343	0.686921	0.142915	0.49562	0.743827	-0.317346	0.0329067	0.999711
ENSMUSG00000003814	Calr	0.00878552	0.969243	0.99182	0.119172	0.711576	0.875717	-0.294561	0.196905	0.999711
ENSMUSG00000003824	Syce2	0.24849	0.324258	0.738991	0.476571	0.169974	0.416215	0.248697	0.307511	0.999711
ENSMUSG00000003847	Nfat5	-0.268843	0.220006	0.65722	-0.525147	0.0915843	0.289419	0.10416	0.630866	0.999711
ENSMUSG00000003848	Nob1	0.391279	0.0103544	0.21501	0.391666	0.0659138	0.235301	0.171878	0.248996	0.999711
ENSMUSG00000003849	Nqo1	0.109965	0.698744	0.915983	0.697876	0.0869897	0.280739	0.464605	0.106019	0.999711
ENSMUSG00000003863	Ppfia3	-0.0254034	0.907366	0.975139	-0.608037	0.0511603	0.201262	0.061476	0.783078	0.999711
ENSMUSG00000003865	Gys1	-0.372951	0.0459263	0.3846	0.196425	0.460363	0.716301	0.000177683	0.999237	0.999972
ENSMUSG00000003868	Ruvbl2	-0.137917	0.396757	0.782211	0.158049	0.485978	0.735957	-0.00375586	0.981373	0.999711
ENSMUSG00000003872	Lin7b	-0.0302999	0.860641	0.960271	-0.734258	0.00239572	0.0209969	-0.346403	0.0426281	0.999711
ENSMUSG00000003873	Bax	0.262881	0.0898098	0.48799	0.170974	0.431479	0.694	-0.0439977	0.775538	0.999711
ENSMUSG00000003923	Tfam	0.28738	0.0761394	0.457422	0.365268	0.104696	0.31342	0.0120458	0.939101	0.999711
ENSMUSG00000003929	Zfp81	0.136779	0.538125	0.857295	-0.249816	0.423605	0.687265	0.0101387	0.962554	0.999711
ENSMUSG00000003934	Efnb3	0.252249	0.131104	0.549675	0.684239	0.0038525	0.0302392	0.362519	0.0307571	0.999711
ENSMUSG00000003948	Mmd	0.174724	0.411645	0.789455	-0.209184	0.487165	0.736835	-0.214308	0.31422	0.999711
ENSMUSG00000003949	Hlf	-0.137909	0.506521	0.844361	0.0450809	0.877921	0.951933	-0.242734	0.24187	0.999711
ENSMUSG00000003955	Fam162a	-0.0449084	0.843784	0.956891	0.559479	0.0811711	0.269001	-0.0823463	0.717334	0.999711
ENSMUSG00000003970	Rpl8	-0.165651	0.343586	0.751627	0.259389	0.294235	0.567365	-0.10681	0.541772	0.999711
ENSMUSG00000003974	Grm3	-0.0173317	0.94048	0.984018	-0.99507	0.00254809	0.0220437	-0.175512	0.450296	0.999711
ENSMUSG00000003992	Ssbp2	0.197291	0.273185	0.696629	-0.0992207	0.6957	0.869035	0.202389	0.258032	0.999711
ENSMUSG00000004018	Fancl	0.580918	0.00090003	0.0676792	0.0848802	0.717634	0.87833	0.233819	0.143753	0.999711
ENSMUSG00000004031	Brinp2	0.264934	0.168397	0.597046	-0.522833	0.054856	0.209727	0.186617	0.332353	0.999711
ENSMUSG00000004032	Gstm5	0.0410531	0.891857	0.970788	0.26715	0.531776	0.76564	0.296961	0.325971	0.999711
ENSMUSG00000004035	Gstm7	0.139017	0.491359	0.837156	-0.371989	0.197163	0.452636	-0.16267	0.426268	0.999711
ENSMUSG00000004040	Stat3	-0.0528781	0.773549	0.938271	0.441452	0.0901978	0.286843	-0.036468	0.842477	0.999711
ENSMUSG00000004044	Ptrf	0.981249	0.0134918	0.234137	0.510704	0.365372	0.63588	0.13926	0.72464	0.999711
ENSMUSG00000004054	Map3k11	0.572258	0.0892961	0.487639	1.11685	0.0202076	0.104855	-0.186207	0.591058	0.999711
ENSMUSG00000004056	Akt2	-0.475678	0.153755	0.579977	-0.162607	0.731328	0.884316	-0.330165	0.324179	0.999711
ENSMUSG00000004069	Dnaja3	0.0144102	0.925854	0.979873	0.0842713	0.698418	0.869668	-0.213281	0.163662	0.999711
ENSMUSG00000004070	Hmox2	0.117548	0.445984	0.809438	-0.0816244	0.706462	0.873477	-0.00645925	0.966268	0.999711
ENSMUSG00000004071	Cdip1	0.0835649	0.533649	0.855375	0.50206	0.00804841	0.0537504	-0.0144253	0.914145	0.999711
ENSMUSG00000004085	Map3k20	0.504209	0.0168317	0.258354	1.76394	6.92661e-09	3.14164e-07	0.317662	0.1383	0.999711
ENSMUSG00000004096	Cwc15	0.0198939	0.927756	0.980606	0.255042	0.410489	0.676672	0.03896	0.858817	0.999711
ENSMUSG00000004099	Dnmt1	-0.0303224	0.874841	0.964494	0.00684348	0.979803	0.99144	-0.119173	0.532132	0.999711
ENSMUSG00000004100	Ppan	0.112553	0.736434	0.927253	-0.262964	0.557536	0.783521	0.705586	0.0256589	0.999711
ENSMUSG00000004110	Cacna1e	-0.0935812	0.672463	0.906333	-0.674941	0.0316493	0.144363	0.235497	0.287879	0.999711
ENSMUSG00000004113	Cacna1b	-0.00622009	0.974839	0.993524	-0.454679	0.104112	0.312454	0.174219	0.377417	0.999711
ENSMUSG00000004127	Trmt10a	-0.485338	0.00322871	0.129314	-0.249493	0.257822	0.525753	-0.278011	0.0572988	0.999711
ENSMUSG00000004151	Etv1	0.0978721	0.530568	0.853921	-2.14684	5.07898e-22	2.16364e-19	-0.0901385	0.559246	0.999711
ENSMUSG00000004187	Kifc2	0.209332	0.215037	0.652454	-0.0719774	0.763503	0.902249	0.238031	0.160072	0.999711
ENSMUSG00000004207	Psap	-0.110432	0.720541	0.922558	-0.0888263	0.838763	0.935585	0.121025	0.695046	0.999711
ENSMUSG00000004221	Ikbkg	0.108207	0.547581	0.860939	-0.23594	0.351947	0.625259	0.0296387	0.867747	0.999711
ENSMUSG00000004233	Wars2	-0.30413	0.109637	0.514274	-0.072357	0.791193	0.915365	-0.138377	0.452453	0.999711
ENSMUSG00000004263	Atn1	0.135487	0.356429	0.75885	0.228498	0.269818	0.540558	0.182758	0.215135	0.999711
ENSMUSG00000004264	Phb2	0.175935	0.288512	0.711986	0.228525	0.326184	0.599255	0.122546	0.457748	0.999711
ENSMUSG00000004266	Ptpn6	-0.498113	0.238536	0.671813	0.127714	0.833839	0.933353	-0.0397053	0.927213	0.999711
ENSMUSG00000004267	Eno2	0.276821	0.164872	0.593381	0.300655	0.285667	0.558074	-0.0558571	0.778995	0.999711
ENSMUSG00000004268	Emg1	-0.0323777	0.824588	0.951651	0.295505	0.147065	0.384131	-0.0169094	0.906205	0.999711
ENSMUSG00000004270	Lpcat3	0.0491839	0.81157	0.947989	-0.234226	0.434681	0.69662	0.186272	0.370325	0.999711
ENSMUSG00000004285	Atp6v1f	0.107594	0.517278	0.849024	0.245333	0.295099	0.568063	-0.125006	0.450424	0.999711
ENSMUSG00000004317	Clcn5	-0.416003	0.0263364	0.308071	0.589053	0.0288847	0.135489	0.041072	0.824812	0.999711
ENSMUSG00000004319	Clcn3	0.103035	0.46313	0.820708	0.172653	0.384973	0.653772	0.0326477	0.816266	0.999711
ENSMUSG00000004328	Hif3a	-0.00996785	0.986621	0.996975	-2.85932	0.00147952	0.0142753	0.577608	0.329914	0.999711
ENSMUSG00000004341	Gpx6	-2.75304	7.15263e-08	6.70344e-05	3.70634	8.3426e-06	0.000178781	-0.925859	0.0568004	0.999711
ENSMUSG00000004347	Pde1c	-0.355343	0.235524	0.669159	1.05669	0.0138139	0.0804788	-0.149878	0.621323	0.999711
ENSMUSG00000004356	Utp20	-0.393815	0.0482304	0.393513	-0.394306	0.162017	0.406284	0.129602	0.507237	0.999711
ENSMUSG00000004360	9330159F19Rik	0.119132	0.521824	0.850764	-0.31054	0.236866	0.500055	-0.170575	0.355437	0.999711
ENSMUSG00000004364	Cul3	0.213257	0.0958262	0.496361	0.0198092	0.912476	0.966515	0.0163697	0.897619	0.999711
ENSMUSG00000004366	Sst	-1.79874	1.84532e-08	2.21737e-05	2.43444	4.51248e-08	1.70988e-06	-0.291646	0.347916	0.999711
ENSMUSG00000004383	Large1	0.025005	0.88614	0.969375	-0.52621	0.0333658	0.150338	-0.0390996	0.823017	0.999711
ENSMUSG00000004393	Ddx56	0.271491	0.0951437	0.495198	0.180298	0.430305	0.693004	0.118517	0.464722	0.999711
ENSMUSG00000004394	Tmed4	0.235129	0.309478	0.72875	0.240355	0.462223	0.717802	0.0761068	0.741958	0.999711
ENSMUSG00000004415	Col26a1	-0.242159	0.358207	0.760445	0.110768	0.772907	0.907274	0.0366798	0.896165	0.999711
ENSMUSG00000004446	Bid	0.258436	0.150358	0.576823	0.572347	0.0202416	0.10493	0.130044	0.449931	0.999711
ENSMUSG00000004451	Ralb	0.0744887	0.751199	0.931936	0.779072	0.0190938	0.101329	-0.200115	0.395084	0.999711
ENSMUSG00000004455	Ppp1cc	0.150868	0.515504	0.848251	1.49988	5.37027e-07	1.55021e-05	0.273446	0.168858	0.999711
ENSMUSG00000004460	Dnajb11	0.264759	0.198147	0.635245	-0.00296304	0.991845	0.996097	0.0218187	0.915902	0.999711
ENSMUSG00000004462	Tbccd1	0.0104582	0.948626	0.985833	0.101558	0.65542	0.847255	-0.113564	0.469886	0.999711
ENSMUSG00000004473	Clec11a	-0.247984	0.33397	0.74464	-0.83555	0.0180255	0.0973129	0.138632	0.596477	0.999711
ENSMUSG00000004500	Zfp324	-0.158909	0.406809	0.788382	-0.443087	0.0980123	0.301237	0.218522	0.240233	0.999711
ENSMUSG00000004508	Gab2	-0.0272803	0.898321	0.972594	0.725468	0.0169728	0.0936805	0.177179	0.411213	0.999711
ENSMUSG00000004530	Coro1c	0.254108	0.0463862	0.386469	0.355845	0.0470954	0.190523	-0.0072641	0.954471	0.999711
ENSMUSG00000004535	Tax1bp1	-0.208843	0.215509	0.652594	-0.0697892	0.769489	0.905324	-0.037424	0.824095	0.999711
ENSMUSG00000004558	Ndrg2	-0.113354	0.786589	0.940817	-0.0621576	0.916423	0.967675	0.210958	0.614518	0.999711
ENSMUSG00000004561	Mettl17	-0.727525	0.00520476	0.163688	-0.630716	0.0831574	0.273393	0.22375	0.379799	0.999711
ENSMUSG00000004562	Arhgef40	-0.42273	0.0851819	0.480682	0.479311	0.171066	0.4177	0.182407	0.471251	0.999711
ENSMUSG00000004565	Pnpla6	-0.152866	0.498486	0.840611	0.176005	0.582186	0.800176	0.117588	0.604931	0.999711
ENSMUSG00000004567	Mcoln1	-0.0425392	0.848648	0.958179	-0.180698	0.566935	0.789679	0.0964783	0.666359	0.999711
ENSMUSG00000004568	Arhgef18	-0.0807691	0.601788	0.885555	0.222078	0.30968	0.584046	-0.116349	0.449182	0.999711
ENSMUSG00000004591	Pkn2	-0.14663	0.439074	0.806441	-0.387226	0.153335	0.39396	-0.0109392	0.953404	0.999711
ENSMUSG00000004609	Cd33	-0.0193178	0.95286	0.986908	1.50805	0.00421796	0.0325624	0.360865	0.264637	0.999711
ENSMUSG00000004610	Etfb	-0.214436	0.448043	0.810943	0.372307	0.352166	0.625569	-0.161749	0.569104	0.999711
ENSMUSG00000004626	Stxbp2	-0.100341	0.735827	0.926798	-0.995098	0.0187325	0.100016	0.352498	0.233238	0.999711
ENSMUSG00000004631	Sgce	-0.133055	0.579302	0.873427	0.529548	0.1195	0.33986	-0.0845759	0.725004	0.999711
ENSMUSG00000004633	Chn2	0.21748	0.139289	0.565443	0.832056	6.888e-05	0.00111203	-0.0900145	0.538524	0.999711
ENSMUSG00000004637	Wwox	-0.0423033	0.732394	0.925269	0.122675	0.475577	0.728211	0.0345234	0.775546	0.999711
ENSMUSG00000004642	Slbp	0.51612	0.0165401	0.255947	0.662645	0.0257972	0.124795	0.233973	0.259062	0.999711
ENSMUSG00000004661	Arid3b	-0.690598	0.0803625	0.46664	-0.53032	0.347248	0.621528	0.105925	0.783219	0.999711
ENSMUSG00000004665	Cnn2	0.119794	0.706489	0.918018	2.26109	1.85829e-06	4.69009e-05	-0.101528	0.754955	0.999711
ENSMUSG00000004667	Polr2e	0.000104191	0.999514	0.999845	-0.290113	0.22775	0.490271	-0.112299	0.508465	0.999711
ENSMUSG00000004677	Myo9b	-0.368035	0.231538	0.667823	-0.622219	0.163043	0.407146	0.162352	0.598296	0.999711
ENSMUSG00000004698	Hdac9	-0.0413296	0.865464	0.961918	-0.788593	0.0208926	0.107467	-0.407943	0.0872815	0.999711
ENSMUSG00000004730	Adgre1	-0.277181	0.518567	0.849263	1.19504	0.065344	0.234159	-0.443259	0.304604	0.999711
ENSMUSG00000004748	Mtfp1	0.142852	0.373971	0.768946	0.347935	0.124135	0.347143	-0.137865	0.388643	0.999711
ENSMUSG00000004768	Rab23	0.190865	0.27027	0.695616	-0.0632963	0.795266	0.91736	0.0669498	0.693101	0.999711
ENSMUSG00000004771	Rab11a	0.306103	0.0621464	0.422207	0.208499	0.367225	0.637589	-0.21334	0.191464	0.999711
ENSMUSG00000004788	Eif2b2	0.289145	0.119442	0.526701	0.0607197	0.815297	0.926111	-0.0815391	0.6563	0.999711
ENSMUSG00000004789	Dlst	0.0285903	0.842658	0.956444	0.240289	0.23565	0.499167	-0.137117	0.337747	0.999711
ENSMUSG00000004791	Pgf	-0.198892	0.453499	0.814598	0.359613	0.317352	0.591219	-0.204988	0.425375	0.999711
ENSMUSG00000004798	Ulk2	-0.107038	0.490211	0.83687	-0.350415	0.11131	0.324511	-0.224529	0.147794	0.999711
ENSMUSG00000004815	Dgkq	-0.298007	0.302709	0.723602	-0.238019	0.558307	0.783849	-0.0518093	0.856154	0.999711
ENSMUSG00000004843	Chmp2b	0.423475	0.0474752	0.389613	0.629129	0.036082	0.159347	-0.0403871	0.848408	0.999711
ENSMUSG00000004846	Plod3	-0.221636	0.257913	0.68789	-0.0496781	0.860963	0.944387	0.17033	0.397292	0.999711
ENSMUSG00000004849	Ap1s1	0.159601	0.389603	0.778077	0.00935789	0.971442	0.988458	-0.119944	0.51809	0.999711
ENSMUSG00000004864	Mapk13	0.713332	0.093424	0.492784	-0.55132	0.389591	0.657566	0.437243	0.296762	0.999711
ENSMUSG00000004865	Srpk1	-0.430484	0.103633	0.506208	-0.216935	0.560765	0.785809	-0.265086	0.314159	0.999711
ENSMUSG00000004880	Lbr	0.293462	0.208592	0.646988	-0.140796	0.674064	0.85722	0.324135	0.16182	0.999711
ENSMUSG00000004885	Crabp2	-0.189513	0.57072	0.869439	1.33389	0.00598852	0.0426261	-0.0788899	0.803891	0.999711
ENSMUSG00000004891	Nes	0.549409	0.204887	0.645159	-1.31224	0.0651151	0.233904	0.128279	0.784754	0.999711
ENSMUSG00000004892	Bcan	-0.23403	0.554232	0.864272	-0.0804623	0.886375	0.95484	0.211914	0.593313	0.999711
ENSMUSG00000004895	Prcc	-0.102278	0.610795	0.889152	0.354281	0.203546	0.459303	-0.0723234	0.711683	0.999711
ENSMUSG00000004896	Rrnad1	-0.339812	0.267749	0.694252	-0.706704	0.100882	0.306306	0.314074	0.294612	0.999711
ENSMUSG00000004897	Hdgf	0.16549	0.486809	0.835149	0.347943	0.300784	0.574201	0.0861904	0.717015	0.999711
ENSMUSG00000004902	Slc25a18	-0.717469	0.0976971	0.499534	-0.181535	0.768865	0.905001	-0.438232	0.311376	0.999711
ENSMUSG00000004929	Thop1	0.304469	0.431395	0.800918	-0.384968	0.477443	0.729289	-0.326268	0.3972	0.999711
ENSMUSG00000004931	Apba3	-0.38518	0.175119	0.606958	-0.347687	0.385694	0.654447	0.129921	0.64948	0.999711
ENSMUSG00000004933	Matk	0.0197827	0.9075	0.975139	-0.484502	0.0437725	0.180933	0.00870599	0.95939	0.999711
ENSMUSG00000004934	Pias4	-0.328947	0.323054	0.738093	-0.708879	0.133008	0.362229	0.408337	0.194693	0.999711
ENSMUSG00000004936	Map2k1	0.443898	0.0182126	0.269027	0.0836949	0.75201	0.896063	-0.0749121	0.68887	0.999711
ENSMUSG00000004937	Sgta	0.207072	0.238115	0.671813	0.115699	0.639326	0.838087	0.0133666	0.939035	0.999711
ENSMUSG00000004945	Tmem242	-0.0620645	0.760927	0.934281	0.440659	0.124871	0.348247	-0.224904	0.268945	0.999711
ENSMUSG00000004947	Dtx2	-0.23515	0.461139	0.819747	-0.207168	0.628663	0.832493	0.0983994	0.740695	0.999711
ENSMUSG00000004952	Rasa4	-0.224368	0.452714	0.814527	-0.234236	0.597282	0.810795	0.0192776	0.950051	0.999711
ENSMUSG00000004961	Syt5	0.765987	0.00488638	0.156833	-0.294326	0.44191	0.701725	0.0173115	0.949133	0.999711
ENSMUSG00000004980	Hnrnpa2b1	-0.0192485	0.878339	0.965773	0.214914	0.226226	0.488673	-0.125001	0.319389	0.999711
ENSMUSG00000004994	Ccdc130	0.307476	0.157111	0.583936	-0.0360694	0.903196	0.962563	0.0989747	0.620218	0.999711
ENSMUSG00000004996	Mri1	0.14219	0.510431	0.846384	-0.126282	0.673048	0.856573	0.276008	0.182783	0.999711
ENSMUSG00000005034	Prkacb	0.192023	0.188295	0.622663	0.110392	0.59218	0.807607	-0.0971196	0.50459	0.999711
ENSMUSG00000005043	Sgsh	0.012895	0.972903	0.992754	-1.40118	0.0200442	0.104364	-0.16201	0.687244	0.999711
ENSMUSG00000005045	Chd5	-0.0475608	0.782316	0.940294	0.021936	0.928202	0.971533	0.0100819	0.953639	0.999711
ENSMUSG00000005054	Cstb	0.159682	0.38016	0.773057	0.96392	0.00016818	0.00236665	0.0341057	0.850332	0.999711
ENSMUSG00000005057	Sh2b2	-0.012966	0.965011	0.990454	0.941887	0.0244051	0.120381	0.332323	0.265167	0.999711
ENSMUSG00000005069	Pex5	0.404591	0.100834	0.50324	1.18474	0.000674305	0.00742898	-0.182545	0.458191	0.999711
ENSMUSG00000005078	Jkamp	-0.0409059	0.8476	0.95804	-0.0804848	0.789168	0.914451	-0.0400121	0.85114	0.999711
ENSMUSG00000005087	Cd44	0.486285	0.11915	0.526231	-1.01147	0.0249494	0.121944	0.12967	0.675743	0.999711
ENSMUSG00000005089	Slc1a2	0.0872877	0.855121	0.95969	-0.869704	0.199165	0.454743	0.257211	0.590781	0.999711
ENSMUSG00000005102	Eif2ak4	-0.068727	0.720051	0.922558	0.454909	0.0912517	0.288923	0.125913	0.502242	0.999711
ENSMUSG00000005103	Wdr1	0.244313	0.10079	0.50324	-0.170446	0.417729	0.682999	-0.028122	0.849853	0.999711
ENSMUSG00000005107	Slc2a9	-0.0617074	0.865403	0.961918	-5.16531	4.89406e-10	2.95282e-08	0.277424	0.466731	0.999711
ENSMUSG00000005124	Wisp1	0.0557988	0.869567	0.963357	0.855105	0.0762311	0.258074	-0.389496	0.244925	0.999711
ENSMUSG00000005125	Ndrg1	-0.314645	0.240233	0.671813	-1.08614	0.00480826	0.0359928	-0.204692	0.446335	0.999711
ENSMUSG00000005142	Man2b1	0.129777	0.571008	0.869638	-0.734709	0.0238753	0.118558	0.305033	0.184511	0.999711
ENSMUSG00000005148	Klf5	0.0984923	0.790152	0.941989	1.27477	0.013127	0.07744	-0.440286	0.218486	0.999711
ENSMUSG00000005150	Wdr83	0.0259383	0.852537	0.958874	-0.0219299	0.910178	0.965572	-0.0165399	0.904276	0.999711
ENSMUSG00000005161	Prdx2	0.0924298	0.567886	0.868649	0.350282	0.125667	0.349688	-0.0194397	0.904351	0.999711
ENSMUSG00000005198	Polr2a	0.394569	0.0526225	0.404196	-0.052982	0.853025	0.942207	0.392775	0.0503456	0.999711
ENSMUSG00000005204	Senp3	0.0908831	0.60219	0.885555	0.222496	0.364266	0.634645	0.0015937	0.992659	0.999711
ENSMUSG00000005225	Plekha8	-0.0960348	0.580161	0.873773	0.240041	0.325228	0.598547	0.00785373	0.961864	0.999711
ENSMUSG00000005233	Spc25	-0.350694	0.295624	0.716572	-0.760365	0.130707	0.358246	-0.11074	0.749307	0.999711
ENSMUSG00000005237	Dnah2	-0.227834	0.557434	0.864672	-0.879931	0.119912	0.340206	0.367929	0.331275	0.999711
ENSMUSG00000005262	Ufd1	0.527942	0.00350131	0.136726	0.0465523	0.854767	0.942546	0.306835	0.0874025	0.999711
ENSMUSG00000005267	Zfp287	-0.239867	0.182679	0.616293	-0.561445	0.0254666	0.123697	0.0383507	0.822059	0.999711
ENSMUSG00000005268	Prlr	-0.307147	0.374555	0.769685	0.0905356	0.856114	0.943038	0.065015	0.849447	0.999711
ENSMUSG00000005299	Letm1	0.140521	0.352749	0.756983	-0.00745189	0.972199	0.988948	0.038002	0.802352	0.999711
ENSMUSG00000005312	Ubqln1	0.0100215	0.949393	0.985899	0.0606837	0.785434	0.912454	-0.0405368	0.796795	0.999711
ENSMUSG00000005338	Cadm3	-0.0552171	0.772012	0.937851	-0.170059	0.529251	0.763576	0.068541	0.720109	0.999711
ENSMUSG00000005354	Txn2	0.0945599	0.513238	0.847819	0.275821	0.176594	0.424949	-0.207635	0.151189	0.999711
ENSMUSG00000005357	Slc1a6	0.251579	0.450816	0.813239	0.602006	0.20249	0.458168	0.38192	0.259243	0.999711
ENSMUSG00000005360	Slc1a3	0.086252	0.86759	0.962608	-0.62106	0.39651	0.664061	0.429353	0.40743	0.999711
ENSMUSG00000005362	Crbn	0.294179	0.0709446	0.444818	-0.0562416	0.806001	0.922325	0.104501	0.516235	0.999711
ENSMUSG00000005370	Msh6	0.207413	0.134358	0.556185	0.0554409	0.774426	0.907921	0.213813	0.116071	0.999711
ENSMUSG00000005371	Fbxo11	0.266146	0.054179	0.40602	0.166535	0.39279	0.660428	-0.0321205	0.815298	0.999711
ENSMUSG00000005374	Tbl2	-0.0516609	0.735564	0.926765	-0.280258	0.203795	0.459569	0.179318	0.24757	0.999711
ENSMUSG00000005378	Wbscr22	-0.160518	0.419169	0.792131	-0.258128	0.351462	0.624633	-0.062694	0.749411	0.999711
ENSMUSG00000005397	Nid1	0.637876	0.151605	0.577108	0.966485	0.142551	0.377255	-0.0540928	0.903658	0.999711
ENSMUSG00000005410	Mcm5	-0.00754627	0.967357	0.991381	-0.427475	0.0918712	0.289931	0.00748604	0.966309	0.999711
ENSMUSG00000005413	Hmox1	0.164195	0.494562	0.838906	0.976315	0.00451835	0.0343176	0.105894	0.653597	0.999711
ENSMUSG00000005417	Mprip	0.0428977	0.917628	0.978386	1.64855	0.00524802	0.0384453	0.0830382	0.841388	0.999711
ENSMUSG00000005442	Cic	0.115122	0.596959	0.882352	-0.284369	0.359777	0.631498	0.260843	0.238824	0.999711
ENSMUSG00000005447	Pafah1b3	-0.03205	0.874104	0.964465	1.0107	0.000235678	0.00312857	-0.041772	0.834514	0.999711
ENSMUSG00000005469	Prkaca	0.285144	0.0645701	0.42878	0.429259	0.0476864	0.192205	-0.0992967	0.515723	0.999711
ENSMUSG00000005470	Asf1b	0.417486	0.333069	0.74377	-0.652561	0.278397	0.5496	0.684448	0.101773	0.999711
ENSMUSG00000005481	Ddx39	-0.0349658	0.836687	0.954963	-0.346925	0.143145	0.378045	0.224882	0.174457	0.999711
ENSMUSG00000005483	Dnajb1	0.263825	0.242628	0.673706	0.237328	0.453171	0.710379	-0.0946547	0.670404	0.999711
ENSMUSG00000005501	Usp40	-0.640293	0.0649892	0.429966	-1.21168	0.0140629	0.0812895	0.227853	0.508569	0.999711
ENSMUSG00000005505	Kbtbd4	-0.0140551	0.967989	0.991619	-0.760712	0.120142	0.340555	0.271894	0.418469	0.999711
ENSMUSG00000005506	Celf1	0.207547	0.178491	0.612603	-0.139067	0.523523	0.760759	0.0320039	0.835247	0.999711
ENSMUSG00000005510	Ndufs3	0.0804259	0.520752	0.85016	0.11444	0.512837	0.75455	-0.0361047	0.771065	0.999711
ENSMUSG00000005514	Por	0.148661	0.517827	0.849263	0.155261	0.634338	0.835825	0.182348	0.433433	0.999711
ENSMUSG00000005533	Igf1r	-0.271863	0.326945	0.739605	-0.604353	0.131386	0.359692	-0.0333934	0.904812	0.999711
ENSMUSG00000005534	Insr	0.140707	0.382137	0.774873	0.0390068	0.867026	0.947206	0.158627	0.32691	0.999711
ENSMUSG00000005553	Atp4a	0.457458	0.187465	0.621708	-1.87655	0.000300998	0.003795	0.0382222	0.914118	0.999711
ENSMUSG00000005566	Trim28	0.234933	0.200217	0.638789	0.162714	0.529081	0.763576	0.132537	0.468317	0.999711
ENSMUSG00000005575	Ube2m	-0.0143286	0.9421	0.984322	0.370634	0.182461	0.433284	-0.0854698	0.663909	0.999711
ENSMUSG00000005580	Adcy9	0.17628	0.479578	0.832201	-0.677112	0.0557438	0.212234	0.229533	0.357706	0.999711
ENSMUSG00000005583	Mef2c	0.267186	0.112919	0.519347	-0.866177	0.000282715	0.0036296	-0.0178041	0.915752	0.999711
ENSMUSG00000005609	Ctr9	-0.0800109	0.63337	0.893156	0.24804	0.294942	0.568063	-0.103488	0.536678	0.999711
ENSMUSG00000005610	Eif4g2	0.011208	0.957335	0.988484	0.0273786	0.926366	0.97102	-0.265166	0.205812	0.999711
ENSMUSG00000005611	Mrvi1	0.229486	0.678809	0.909261	3.85093	7.8823e-06	0.000170214	-0.708835	0.212317	0.999711
ENSMUSG00000005615	Pcyt1a	0.162937	0.443709	0.809175	0.805009	0.00769866	0.0518829	0.0756084	0.722906	0.999711
ENSMUSG00000005621	Zfp592	-0.0958263	0.461502	0.819995	-0.226502	0.227872	0.490271	-0.032078	0.804984	0.999711
ENSMUSG00000005625	Psmd4	0.231626	0.104936	0.508031	0.198462	0.322761	0.596709	0.0796285	0.575051	0.999711
ENSMUSG00000005656	Snx6	-0.146935	0.288458	0.711986	0.26421	0.176422	0.424663	-0.144782	0.295128	0.999711
ENSMUSG00000005667	Mthfd2	0.101551	0.623651	0.891438	0.580182	0.0405874	0.171729	-0.175109	0.370333	0.999711
ENSMUSG00000005672	Kit	-0.783356	0.000812186	0.0656191	1.82861	3.92871e-08	1.51314e-06	0.00145964	0.994982	0.999711
ENSMUSG00000005674	Tomm40l	-0.187391	0.361513	0.763309	0.304187	0.289313	0.561995	-0.475967	0.0206086	0.999711
ENSMUSG00000005681	Apoa2	0.0353455	0.89038	0.970426	1.27645	0.000312963	0.00392474	0.161493	0.572198	0.999711
ENSMUSG00000005682	Pan2	-0.183527	0.591965	0.879409	-0.475721	0.32737	0.600538	0.412056	0.225761	0.999711
ENSMUSG00000005683	Cs	0.0236305	0.884913	0.968781	0.0636283	0.782768	0.911392	0.0207305	0.898906	0.999711
ENSMUSG00000005686	Ampd3	-0.0889871	0.686196	0.91375	1.20026	0.00014739	0.00212295	-0.175157	0.427838	0.999711
ENSMUSG00000005687	Bcas2	0.259137	0.140425	0.567041	0.419164	0.088749	0.283876	0.13316	0.441989	0.999711
ENSMUSG00000005698	Ctcf	-0.297077	0.120284	0.528754	-0.0497486	0.853413	0.942367	-0.109227	0.565341	0.999711
ENSMUSG00000005699	Pard6a	0.0311814	0.845986	0.957618	0.297081	0.186452	0.438758	0.077971	0.62436	0.999711
ENSMUSG00000005716	Pvalb	-1.00124	0.0124195	0.227335	3.81944	4.47892e-11	3.34919e-09	-0.440665	0.267083	0.999711
ENSMUSG00000005774	Rfx5	0.0224027	0.921347	0.979184	0.568335	0.0607538	0.22405	0.196004	0.32944	0.999711
ENSMUSG00000005779	Psmb4	-0.0350812	0.875937	0.964889	0.117488	0.711322	0.875717	-0.00570452	0.979745	0.999711
ENSMUSG00000005802	Slc30a4	0.572699	0.0125708	0.227716	-0.0920146	0.776478	0.90866	0.112012	0.624353	0.999711
ENSMUSG00000005803	Sqrdl	-0.229182	0.521477	0.85052	-0.0639474	0.906687	0.964134	-0.205529	0.573561	0.999711
ENSMUSG00000005804	Bloc1s6	0.498517	0.00480866	0.156501	0.038084	0.876936	0.951585	-0.0366568	0.832147	0.999711
ENSMUSG00000005813	Metap1	0.171409	0.252336	0.681696	-0.404413	0.0523741	0.20356	0.0139778	0.9234	0.999711
ENSMUSG00000005823	Gpr108	-0.114358	0.596194	0.882149	-0.150141	0.623972	0.829138	-0.0859635	0.692542	0.999711
ENSMUSG00000005846	Rsl1d1	0.290299	0.0312069	0.331443	0.234098	0.215327	0.474016	0.204838	0.124297	0.999711
ENSMUSG00000005871	Apc	0.282183	0.384369	0.776248	-0.0395593	0.931245	0.972464	0.316385	0.32974	0.999711
ENSMUSG00000005873	Reep5	0.0672047	0.701569	0.916799	0.275132	0.267379	0.536974	-0.0590217	0.73674	0.999711
ENSMUSG00000005881	Ergic3	0.163797	0.33808	0.748107	0.158236	0.512855	0.75455	0.192849	0.260487	0.999711
ENSMUSG00000005882	Uqcc1	-0.0381118	0.756417	0.933817	0.667754	0.000106717	0.00162891	-0.0542916	0.657767	0.999711
ENSMUSG00000005886	Ncoa2	-0.0416613	0.793504	0.943029	-0.14983	0.505261	0.750366	-0.015021	0.923637	0.999711
ENSMUSG00000005892	Trh	0.886999	0.125623	0.538731	0.0646061	0.936359	0.974846	0.538611	0.354551	0.999711
ENSMUSG00000005893	Nr2c2	-0.429493	0.00854901	0.201147	-0.324778	0.161093	0.40464	0.0391023	0.809328	0.999711
ENSMUSG00000005897	Nr2c1	0.0417201	0.84107	0.95592	0.0399051	0.892353	0.95712	0.0422254	0.834073	0.999711
ENSMUSG00000005899	Smpd4	0.0053788	0.986057	0.996773	-0.822926	0.059068	0.219968	-0.142346	0.640748	0.999711
ENSMUSG00000005907	Pex1	-0.0304009	0.828637	0.952968	-0.189746	0.338892	0.611964	-0.0280826	0.838359	0.999711
ENSMUSG00000005917	Otx1	0.0573631	0.804153	0.946218	-2.55772	3.30801e-14	4.18955e-12	0.0851663	0.687644	0.999711
ENSMUSG00000005936	Kctd20	-0.155585	0.389171	0.777789	-0.0563832	0.824884	0.929861	-0.072204	0.688381	0.999711
ENSMUSG00000005949	Ctns	0.288385	0.245288	0.675412	-0.687664	0.0506037	0.199828	0.332321	0.175093	0.999711
ENSMUSG00000005950	P2rx5	0.443136	0.286606	0.708895	-0.817125	0.168454	0.41416	0.337086	0.477303	0.999711
ENSMUSG00000005951	Shpk	0.477942	0.145138	0.573517	0.382493	0.409741	0.675959	0.449852	0.168631	0.999711
ENSMUSG00000005958	Ephb3	0.0989803	0.704701	0.917173	-1.25018	0.000915744	0.00959827	0.0321147	0.903444	0.999711
ENSMUSG00000005968	Tuft1	0.381041	0.329237	0.741255	1.36871	0.00758516	0.0513148	-0.101592	0.763084	0.999711
ENSMUSG00000005973	Rcn1	-0.233808	0.309321	0.728675	1.41325	1.59894e-05	0.000315081	-0.178116	0.443028	0.999711
ENSMUSG00000005980	Dnase1	-0.707913	0.108828	0.513687	-0.0563472	0.921771	0.969639	-0.705221	0.0612153	0.999711
ENSMUSG00000005981	Trap1	-0.256959	0.280245	0.704739	-0.168247	0.616555	0.82603	-0.00419429	0.985898	0.999711
ENSMUSG00000005982	Naa60	-0.0497236	0.72006	0.922558	0.42806	0.0280132	0.132591	-0.281864	0.0405634	0.999711
ENSMUSG00000005983	1700037C18Rik	-0.164607	0.588637	0.877198	-0.120737	0.76526	0.903276	-0.277815	0.346797	0.999711
ENSMUSG00000005986	Ankrd13d	0.104789	0.48162	0.832681	-0.042271	0.839029	0.935585	-0.101729	0.48847	0.999711
ENSMUSG00000006005	Tpr	-0.149593	0.406621	0.788382	-0.0252027	0.921285	0.969581	0.145921	0.417975	0.999711
ENSMUSG00000006010	BC003331	0.0407557	0.760831	0.934281	0.366895	0.052941	0.205116	0.144818	0.28123	0.999711
ENSMUSG00000006014	Prg4	-0.024378	0.956091	0.987853	-0.2083	0.748802	0.893983	0.0378875	0.93054	0.999711
ENSMUSG00000006019	Dhx34	-0.426774	0.0906859	0.489465	-0.178547	0.623046	0.828453	0.24936	0.358587	0.999711
ENSMUSG00000006021	Kptn	-0.289923	0.0585558	0.415117	0.0859212	0.68573	0.863824	-0.182848	0.219904	0.999711
ENSMUSG00000006024	Napa	0.359243	0.0127311	0.229453	-0.144295	0.478087	0.729392	-0.111458	0.438071	0.999711
ENSMUSG00000006050	Sra1	-0.0945683	0.538416	0.857295	0.0871336	0.686569	0.86411	-0.0855317	0.574434	0.999711
ENSMUSG00000006057	Atp5g1	0.0214294	0.916626	0.977985	0.401342	0.162583	0.406458	0.0265047	0.89617	0.999711
ENSMUSG00000006058	Snf8	-0.0597887	0.753562	0.932882	0.207837	0.436024	0.69695	0.0593111	0.753677	0.999711
ENSMUSG00000006095	Tbcb	0.069128	0.691551	0.9152	-0.104656	0.670117	0.855243	-0.0906513	0.602545	0.999711
ENSMUSG00000006127	Inpp5k	0.477218	0.0409023	0.368457	-0.485743	0.140013	0.373564	0.391489	0.0913144	0.999711
ENSMUSG00000006134	Crkl	0.20675	0.269926	0.695555	0.521274	0.0468194	0.189843	0.0343295	0.851098	0.999711
ENSMUSG00000006154	Eps8l1	-0.523192	0.0499586	0.397914	-0.606487	0.114865	0.331712	-0.241781	0.373307	0.999711
ENSMUSG00000006169	Clint1	0.119996	0.426637	0.798209	0.143295	0.497382	0.745278	-0.245465	0.0985344	0.999711
ENSMUSG00000006179	Prss16	0.417207	0.40675	0.788382	-1.88175	0.00907421	0.0587047	-1.3226	0.00587427	0.999711
ENSMUSG00000006191	Cdkal1	-0.0177914	0.926051	0.979886	0.356047	0.185675	0.43803	-0.220817	0.240704	0.999711
ENSMUSG00000006205	Htra1	-0.242396	0.430758	0.800543	1.27814	0.00349338	0.0282403	0.331071	0.282471	0.999711
ENSMUSG00000006215	Zbtb17	-0.279476	0.144691	0.572978	-0.326481	0.224088	0.485471	-0.040609	0.833153	0.999711
ENSMUSG00000006219	Fblim1	-0.0561523	0.874105	0.964465	2.53843	3.39287e-07	1.04066e-05	-0.19216	0.583568	0.999711
ENSMUSG00000006235	Epor	-0.316581	0.257412	0.686921	0.356961	0.350248	0.623802	0.257883	0.3559	0.999711
ENSMUSG00000006241	Ccdc159	-0.563618	0.012205	0.225168	-0.544756	0.0622032	0.226958	-0.161232	0.421423	0.999711
ENSMUSG00000006262	Mob1b	0.33058	0.0671381	0.436498	0.0781737	0.757621	0.898713	0.212917	0.224257	0.999711
ENSMUSG00000006273	Atp6v1b2	0.26531	0.221839	0.658639	0.198964	0.516702	0.756886	0.00805846	0.970362	0.999711
ENSMUSG00000006276	Eps15l1	0.178668	0.411384	0.789129	-0.0318574	0.916747	0.967746	0.31601	0.138389	0.999711
ENSMUSG00000006281	Tep1	-0.501968	0.117795	0.524661	-0.65686	0.168152	0.413815	-0.393203	0.220996	0.999711
ENSMUSG00000006288	Ttc5	0.0703792	0.612963	0.889851	-0.393403	0.0434025	0.17978	-0.200805	0.141546	0.999711
ENSMUSG00000006289	Osgep	-0.323178	0.16435	0.592874	0.662414	0.0427897	0.178059	-0.409331	0.0776182	0.999711
ENSMUSG00000006299	Aamp	0.143381	0.425994	0.797631	0.494141	0.0517446	0.202569	-0.214423	0.234133	0.999711
ENSMUSG00000006301	Tmbim1	-0.0453921	0.891478	0.970788	-0.0866259	0.856525	0.943038	-0.0745183	0.822739	0.999711
ENSMUSG00000006304	Arpc2	0.277615	0.14229	0.569239	-0.0616093	0.817607	0.927354	0.142897	0.449334	0.999711
ENSMUSG00000006307	Kmt2b	-0.0374089	0.842088	0.956191	-0.127848	0.630534	0.833949	0.31195	0.0953451	0.999711
ENSMUSG00000006315	Tmem147	-0.0744828	0.695452	0.915406	0.101137	0.706928	0.873747	-0.0409929	0.829956	0.999711
ENSMUSG00000006333	Rps9	-0.311523	0.0644343	0.428485	0.212683	0.371773	0.642138	-0.0851835	0.613501	0.999711
ENSMUSG00000006335	Tfpt	0.253914	0.241088	0.672301	-0.107616	0.714761	0.877447	0.178041	0.384912	0.999711
ENSMUSG00000006342	Susd2	0.37399	0.221161	0.658145	-0.594537	0.171096	0.4177	-0.239192	0.439717	0.999711
ENSMUSG00000006356	Crip2	0.251148	0.050016	0.39792	-0.47634	0.00832811	0.0551468	-0.0520565	0.683169	0.999711
ENSMUSG00000006360	Crip1	0.0395362	0.922071	0.979184	-0.0907355	0.881038	0.953254	0.424597	0.312331	0.999711
ENSMUSG00000006362	Cbfa2t3	-0.332157	0.112185	0.518771	-0.688193	0.0207921	0.107123	-0.194288	0.353891	0.999711
ENSMUSG00000006369	Fbln1	0.00908983	0.975208	0.993524	-1.16394	0.00647795	0.045434	0.0156406	0.958213	0.999711
ENSMUSG00000006373	Pgrmc1	0.553729	0.00725316	0.188329	0.184255	0.526248	0.761738	0.16536	0.421635	0.999711
ENSMUSG00000006378	Gcat	0.114474	0.658255	0.90131	-0.333527	0.364126	0.634616	-0.0341243	0.896809	0.999711
ENSMUSG00000006389	Mpl	-0.0724286	0.811507	0.947989	-3.18014	1.03599e-09	5.92031e-08	0.216125	0.518157	0.999711
ENSMUSG00000006390	Elovl1	0.169444	0.645427	0.89702	-0.28556	0.587235	0.804459	0.0799714	0.827816	0.999711
ENSMUSG00000006392	Med8	0.372474	0.0303825	0.329541	0.300776	0.211038	0.469842	0.0940843	0.577287	0.999711
ENSMUSG00000006395	Hyi	-0.282215	0.231957	0.667846	0.800955	0.0124426	0.074361	-0.0428668	0.851299	0.999711
ENSMUSG00000006398	Cdc20	-0.0394039	0.92066	0.979184	-0.977326	0.0789941	0.264404	-0.255107	0.484154	0.999711
ENSMUSG00000006403	Adamts4	-0.197378	0.567906	0.868649	-0.499548	0.313515	0.587085	0.121036	0.726843	0.999711
ENSMUSG00000006411	Nectin4	0.171688	0.602027	0.885555	1.09751	0.0190416	0.101167	0.450954	0.188722	0.999711
ENSMUSG00000006412	Pfdn2	0.133676	0.452455	0.814418	-0.10192	0.684025	0.862858	-0.119642	0.498457	0.999711
ENSMUSG00000006418	Rnf114	0.378455	0.0424017	0.37372	-0.0139067	0.957874	0.98313	0.00421281	0.981978	0.999711
ENSMUSG00000006423	C330007P06Rik	-0.0473436	0.80638	0.946553	0.135392	0.618596	0.826709	-0.119873	0.531821	0.999711
ENSMUSG00000006435	Neurl1a	0.160011	0.446396	0.809524	-0.0108516	0.970901	0.988156	0.065687	0.755771	0.999711
ENSMUSG00000006442	Srm	-0.290814	0.143114	0.570588	0.47042	0.0914331	0.289261	-0.249288	0.204881	0.999711
ENSMUSG00000006456	Rbm14	0.146515	0.445079	0.809433	0.436151	0.0998319	0.304543	0.303037	0.109252	0.999711
ENSMUSG00000006457	Actn3	0.586819	0.0558249	0.409656	-0.39137	0.376987	0.646381	0.468709	0.22597	0.999711
ENSMUSG00000006463	Zdhhc24	0.317219	0.11581	0.522876	-0.191405	0.500885	0.747868	0.131246	0.511594	0.999711
ENSMUSG00000006464	Bbs1	-0.314972	0.0614422	0.421449	-0.00727083	0.976395	0.990058	-0.128094	0.451197	0.999711
ENSMUSG00000006471	Ndor1	-0.269121	0.144286	0.572177	-0.858566	0.000949808	0.00990534	0.252669	0.163542	0.999711
ENSMUSG00000006476	Nsmf	0.124139	0.491667	0.837156	-0.925627	0.000304805	0.00383612	0.0552983	0.760557	0.999711
ENSMUSG00000006494	Pdk1	0.0339206	0.852737	0.958966	-1.13908	1.20782e-05	0.000247876	-0.210659	0.247423	0.999711
ENSMUSG00000006498	Ptbp1	0.071678	0.754931	0.93321	-0.300074	0.373172	0.643215	-0.0143111	0.948851	0.999711
ENSMUSG00000006517	Mvd	-0.0677656	0.765395	0.936114	-0.295086	0.359335	0.631409	-0.408732	0.0726356	0.999711
ENSMUSG00000006519	Cyba	-0.231396	0.53515	0.855679	0.716761	0.202389	0.458162	0.30305	0.427534	0.999711
ENSMUSG00000006522	Itih3	-0.259981	0.624062	0.891753	-1.01486	0.179196	0.428807	0.214055	0.6871	0.999711
ENSMUSG00000006526	Tmem110	0.0602323	0.716831	0.921623	-0.252981	0.288267	0.560584	0.138893	0.410401	0.999711
ENSMUSG00000006527	Sfmbt1	0.106518	0.445252	0.809438	0.100769	0.606379	0.817489	-0.0695563	0.608239	0.999711
ENSMUSG00000006567	Atp7b	0.189593	0.635962	0.894154	0.0166044	0.977747	0.990357	0.241525	0.545554	0.999711
ENSMUSG00000006575	Rundc3a	0.00542864	0.978203	0.994833	-0.0984437	0.726473	0.881474	-0.0223312	0.910997	0.999711
ENSMUSG00000006576	Slc4a3	-0.0618479	0.746646	0.930724	0.173202	0.523011	0.760693	-0.0438263	0.82053	0.999711
ENSMUSG00000006585	Cdt1	1.1108	0.00627055	0.175617	0.884195	0.108746	0.320039	0.497354	0.201255	0.999711
ENSMUSG00000006586	Runx1t1	0.469377	0.0528237	0.404196	0.482809	0.157264	0.399365	-0.0627955	0.793948	0.999711
ENSMUSG00000006589	Aprt	0.166408	0.217519	0.654827	-0.0647684	0.731584	0.884382	-0.0518335	0.697512	0.999711
ENSMUSG00000006599	Gtf2h1	0.233565	0.206714	0.645629	0.0788877	0.760912	0.900865	0.168897	0.353845	0.999711
ENSMUSG00000006611	Hfe	0.0682164	0.766213	0.936563	0.814625	0.0251322	0.122546	0.230823	0.335932	0.999711
ENSMUSG00000006641	Slc5a6	-0.561268	0.0174532	0.261575	0.636615	0.0563307	0.213622	-0.0505833	0.830908	0.999711
ENSMUSG00000006651	Aplp1	0.450871	0.0162483	0.253798	-0.0475043	0.857623	0.943247	0.0226059	0.903956	0.999711
ENSMUSG00000006673	Qrich1	0.246039	0.126859	0.541732	0.0136288	0.951978	0.980505	0.0967646	0.54372	0.999711
ENSMUSG00000006675	P4htm	0.248826	0.303309	0.723925	-0.169616	0.6197	0.826862	0.223419	0.3575	0.999711
ENSMUSG00000006676	Usp19	0.0509742	0.760732	0.934281	-0.121891	0.602384	0.814138	0.320078	0.0526808	0.999711
ENSMUSG00000006678	Pola1	-0.755444	0.000339628	0.0422521	-0.906888	0.00283148	0.0238496	-0.131685	0.537808	0.999711
ENSMUSG00000006699	Cdc42	0.21866	0.110162	0.514695	0.128803	0.505259	0.750366	-0.0162623	0.905256	0.999711
ENSMUSG00000006705	Pknox1	-0.272332	0.150064	0.576411	-0.336462	0.214148	0.473318	-0.106312	0.569116	0.999711
ENSMUSG00000006711	D130043K22Rik	-0.389293	0.335802	0.745885	-1.3241	0.0222071	0.112672	-0.133696	0.74142	0.999711
ENSMUSG00000006715	Gmnn	0.127355	0.604935	0.886907	0.615302	0.0671963	0.238297	-0.147035	0.534143	0.999711
ENSMUSG00000006717	Acot13	-0.142675	0.445892	0.809438	0.199803	0.449068	0.706855	-0.119643	0.521612	0.999711
ENSMUSG00000006720	Zfp184	-0.251183	0.545357	0.860305	-1.15301	0.0458034	0.187019	-0.269424	0.4965	0.999711
ENSMUSG00000006728	Cdk4	-0.141742	0.369119	0.765826	0.208343	0.348789	0.62287	-0.094608	0.548694	0.999711
ENSMUSG00000006731	B4galnt1	0.0207315	0.907434	0.975139	-0.282077	0.263374	0.532506	0.0251342	0.888274	0.999711
ENSMUSG00000006732	Mettl1	-0.235489	0.162833	0.591652	0.016123	0.945112	0.97845	-0.167298	0.305253	0.999711
ENSMUSG00000006736	Tspan31	0.300141	0.265497	0.692702	-0.114184	0.764062	0.902696	-0.198731	0.459987	0.999711
ENSMUSG00000006740	Kif5b	-0.201167	0.420574	0.792764	0.142076	0.687652	0.864593	-0.0599801	0.810378	0.999711
ENSMUSG00000006763	Saal1	0.0296667	0.890192	0.970426	0.508526	0.0954218	0.296647	-0.0967739	0.651386	0.999711
ENSMUSG00000006764	Tph2	0.155236	0.659658	0.901738	0.175403	0.722963	0.880026	-0.19519	0.580214	0.999711
ENSMUSG00000006782	Cnp	0.137739	0.6441	0.89702	0.178511	0.672351	0.856429	-0.138427	0.642516	0.999711
ENSMUSG00000006800	Sulf2	0.403126	0.062017	0.422207	-0.465769	0.126992	0.351853	0.091311	0.672639	0.999711
ENSMUSG00000006818	Sod2	0.243018	0.239892	0.671813	0.362132	0.214611	0.473552	-0.268322	0.193496	0.999711
ENSMUSG00000006850	Tmco6	-0.379561	0.124074	0.53455	-0.541775	0.113262	0.328433	-0.0115459	0.961234	0.999711
ENSMUSG00000006906	Stambp	0.269229	0.0798977	0.466446	0.209965	0.329074	0.602311	0.0997743	0.508885	0.999711
ENSMUSG00000006920	Ezh1	0.0794477	0.696802	0.915406	0.193708	0.500658	0.747776	0.0313806	0.877056	0.999711
ENSMUSG00000006930	Hap1	0.586768	0.0452732	0.382926	0.693037	0.093701	0.293483	0.496623	0.0903177	0.999711
ENSMUSG00000006931	P3h4	0.162166	0.534613	0.855679	0.249115	0.520488	0.759377	0.0756526	0.780915	0.999711
ENSMUSG00000006932	Ctnnb1	0.411586	0.016981	0.258354	-0.18741	0.441534	0.701429	0.128188	0.456758	0.999711
ENSMUSG00000006941	Eif1b	0.250343	0.146845	0.573706	0.52534	0.0304998	0.140487	0.0318133	0.852567	0.999711
ENSMUSG00000006958	Chrd	-0.136397	0.587486	0.877016	-1.44495	5.96643e-05	0.000981007	0.469212	0.063965	0.999711
ENSMUSG00000006998	Psmd2	0.273707	0.101872	0.504136	0.184037	0.436163	0.69695	0.13431	0.421885	0.999711
ENSMUSG00000007021	Syngr3	0.0795993	0.751968	0.932037	0.36465	0.306088	0.579957	-0.240688	0.340017	0.999711
ENSMUSG00000007029	Vars	-0.0740362	0.837861	0.955206	-0.0519174	0.918983	0.96907	0.129059	0.723076	0.999711
ENSMUSG00000007034	Slc44a4	1.17287	0.0025004	0.11297	-0.844618	0.117202	0.335975	0.309346	0.38689	0.999711
ENSMUSG00000007036	Abhd16a	0.174265	0.405447	0.787834	-0.016051	0.956799	0.982425	0.135778	0.519268	0.999711
ENSMUSG00000007038	Neu1	0.184664	0.33327	0.74377	0.264004	0.328022	0.601245	-0.0394066	0.837119	0.999711
ENSMUSG00000007039	Ddah2	0.13789	0.644255	0.89702	2.27532	1.46299e-07	4.95154e-06	0.0943499	0.755011	0.999711
ENSMUSG00000007041	Clic1	-0.277413	0.320288	0.736239	1.57587	0.000158511	0.00225313	-0.0957757	0.734361	0.999711
ENSMUSG00000007050	Lsm2	-0.265362	0.298076	0.719065	0.0245777	0.944103	0.977767	-0.05729	0.808679	0.999711
ENSMUSG00000007080	Pole	0.104143	0.782179	0.940294	-1.39474	0.0120916	0.0727902	0.884907	0.018671	0.999711
ENSMUSG00000007097	Atp1a2	-0.0734263	0.890973	0.970636	-0.373422	0.622289	0.827895	0.0701839	0.895769	0.999711
ENSMUSG00000007207	Stx1a	0.257391	0.186545	0.620658	-2.31848	9.81405e-17	1.91619e-14	-0.192306	0.323387	0.999711
ENSMUSG00000007216	Zfp775	-0.192398	0.473284	0.827232	0.893121	0.0178738	0.0967541	0.148767	0.585316	0.999711
ENSMUSG00000007279	Scube2	-0.367863	0.332166	0.743566	-1.0296	0.0618535	0.226513	0.931993	0.0112648	0.999711
ENSMUSG00000007338	Mrpl49	-0.0585508	0.735445	0.926756	0.106267	0.660156	0.850591	-0.205286	0.226075	0.999711
ENSMUSG00000007411	Mark3	0.227155	0.119003	0.526228	-0.236887	0.248375	0.514007	0.195243	0.177817	0.999711
ENSMUSG00000007415	Gatad1	0.740293	0.00864049	0.201439	0.561733	0.156977	0.399319	-0.0159312	0.954708	0.999711
ENSMUSG00000007440	Pcdha11	-0.0118766	0.954733	0.987409	0.0925495	0.754529	0.897012	-0.0844005	0.686692	0.999711
ENSMUSG00000007458	M6pr	0.348926	0.0735057	0.450949	0.0981851	0.721474	0.879445	0.0561585	0.773542	0.999711
ENSMUSG00000007476	Lrrc8a	1.07688	0.0196276	0.274106	0.838258	0.194775	0.450354	0.310923	0.496034	0.999711
ENSMUSG00000007564	Ppp2r1a	0.495283	0.0109219	0.220013	0.288883	0.292685	0.565653	0.201156	0.300211	0.999711
ENSMUSG00000007570	Fance	-0.0671012	0.740215	0.928733	-0.000692973	0.997933	0.998928	0.103264	0.598885	0.999711
ENSMUSG00000007589	Tinf2	0.13955	0.472019	0.826254	0.221849	0.409208	0.675818	0.536307	0.00530411	0.999711
ENSMUSG00000007594	Hapln4	-0.521047	0.0467812	0.386967	0.173479	0.639019	0.837997	-0.546733	0.0375434	0.999711
ENSMUSG00000007603	Dus3l	-0.00108358	0.995271	0.999109	0.173361	0.499294	0.746869	0.144892	0.424375	0.999711
ENSMUSG00000007610	Gtpbp3	-0.289293	0.15782	0.585095	-0.396515	0.158291	0.400895	0.107595	0.584603	0.999711
ENSMUSG00000007613	Tgfbr1	-0.143719	0.632187	0.893156	-0.851813	0.0486685	0.195002	-0.122404	0.684029	0.999711
ENSMUSG00000007617	Homer1	-0.110233	0.55215	0.863437	-0.438989	0.0937358	0.293483	-0.294956	0.110716	0.999711
ENSMUSG00000007646	Rad51c	0.377781	0.12099	0.530197	0.0996504	0.75521	0.897609	-0.106288	0.618214	0.999711
ENSMUSG00000007653	Gabrb2	0.373401	0.389758	0.778077	0.0763931	0.90078	0.961297	-0.0731864	0.865559	0.999711
ENSMUSG00000007655	Cav1	0.384761	0.233013	0.668359	-1.23694	0.00940765	0.0605553	0.129229	0.691329	0.999711
ENSMUSG00000007656	Arpp19	0.0355059	0.854645	0.959397	0.000355567	0.998962	0.999602	-0.381701	0.048807	0.999711
ENSMUSG00000007659	Bcl2l1	0.326505	0.110226	0.514695	-0.116605	0.685856	0.863824	-0.00786887	0.969247	0.999711
ENSMUSG00000007670	Khsrp	0.386908	0.0580646	0.413549	0.344265	0.231479	0.494713	0.0594726	0.769752	0.999711
ENSMUSG00000007682	Dio2	-0.0583996	0.903812	0.974819	0.282793	0.680484	0.86111	0.340921	0.481779	0.999711
ENSMUSG00000007721	Ccdc124	0.0257136	0.872042	0.963606	-0.0163881	0.941578	0.976878	-0.351696	0.0273126	0.999711
ENSMUSG00000007739	Cct4	0.114203	0.407788	0.788539	0.396757	0.0413346	0.173977	-0.0968122	0.481771	0.999711
ENSMUSG00000007777	0610009B22Rik	0.236315	0.270194	0.695616	0.412103	0.171501	0.418102	0.0854994	0.687259	0.999711
ENSMUSG00000007783	Cpt1c	-0.129906	0.588353	0.877198	-0.409186	0.228653	0.491048	0.0937891	0.69696	0.999711
ENSMUSG00000007812	Zfp655	0.294492	0.115369	0.522675	0.115127	0.658	0.849146	0.0496452	0.78348	0.999711
ENSMUSG00000007815	Rhoa	0.269434	0.167846	0.596854	0.177673	0.519927	0.759314	-0.00550559	0.977515	0.999711
ENSMUSG00000007817	Zmiz1	0.0511063	0.687489	0.91385	-0.418248	0.0208104	0.107123	0.00608956	0.961864	0.999711
ENSMUSG00000007827	Ankrd26	-0.398794	0.0103049	0.21501	0.27036	0.219963	0.479744	-0.147842	0.341292	0.999711
ENSMUSG00000007833	Aldh16a1	-0.193974	0.48099	0.832403	-0.126044	0.75162	0.895796	-0.0843286	0.777155	0.999711
ENSMUSG00000007836	Hnrnpa0	0.409867	0.0466559	0.386499	0.632491	0.0295934	0.137985	0.162397	0.42878	0.999711
ENSMUSG00000007837	Prrg2	-0.00672446	0.977731	0.99463	-0.568374	0.0984631	0.301502	-0.165611	0.506897	0.999711
ENSMUSG00000007850	Hnrnph1	-0.271527	0.145835	0.573637	0.59766	0.0230048	0.115377	-0.181161	0.327302	0.999711
ENSMUSG00000007867	Ift43	-0.197961	0.259435	0.68943	0.598739	0.0125769	0.0749811	-0.277382	0.0951774	0.999711
ENSMUSG00000007872	Id3	-0.220268	0.480058	0.832243	0.74346	0.0977827	0.301156	-0.452041	0.14819	0.999711
ENSMUSG00000007877	Tcap	-0.612307	0.0986315	0.501383	-0.0185037	0.964275	0.985927	-0.68119	0.048756	0.999711
ENSMUSG00000007880	Arid1a	0.111808	0.371251	0.767282	-0.0651709	0.712548	0.875994	0.0971307	0.436439	0.999711
ENSMUSG00000007888	Crlf1	0.386982	0.172331	0.602794	0.0310095	0.93981	0.97641	0.691927	0.0232982	0.999711
ENSMUSG00000007891	Ctsd	-0.118782	0.620424	0.890751	0.181808	0.59204	0.807607	-0.0499122	0.835223	0.999711
ENSMUSG00000007892	Rplp1	-0.330549	0.115498	0.522721	0.160138	0.589483	0.805967	0.00688386	0.973878	0.999711
ENSMUSG00000007908	Hmgcll1	0.0960562	0.609234	0.889152	0.612147	0.0166992	0.0925335	0.0160631	0.92543	0.999711
ENSMUSG00000007944	Ttc9b	-0.172648	0.409899	0.789053	-1.2248	3.7311e-05	0.000653198	-0.127129	0.544418	0.999711
ENSMUSG00000007950	Abhd8	-0.131727	0.448219	0.81103	0.229161	0.351194	0.624633	-0.389939	0.028723	0.999711
ENSMUSG00000007987	Ift22	0.0705142	0.62168	0.890863	-0.471499	0.0187804	0.100157	-0.173295	0.221024	0.999711
ENSMUSG00000007989	Fzd3	-0.0317036	0.862516	0.961406	-0.360469	0.170722	0.417466	0.0126068	0.944638	0.999711
ENSMUSG00000008028	1700008O03Rik	-0.0963803	0.734982	0.926588	-0.0565149	0.89015	0.956195	-0.130479	0.655465	0.999711
ENSMUSG00000008035	Mid1ip1	-0.603958	0.0574386	0.412186	0.468684	0.298293	0.571854	-0.164481	0.605534	0.999711
ENSMUSG00000008036	Ap2s1	0.101403	0.628767	0.892502	-0.280919	0.340259	0.613724	-0.198266	0.342176	0.999711
ENSMUSG00000008090	Fgfrl1	-0.75443	0.0491768	0.396176	-0.573467	0.311151	0.585408	-0.261877	0.498867	0.999711
ENSMUSG00000008129	4930432K21Rik	-0.00859278	0.9811	0.996167	-0.34162	0.484502	0.734751	0.127308	0.695356	0.999711
ENSMUSG00000008136	Fhl2	0.582979	0.0214363	0.284025	-1.61443	6.62607e-06	0.000145773	0.0603832	0.809268	0.999711
ENSMUSG00000008140	Emc10	-0.364531	0.0441855	0.380846	-0.0162564	0.94947	0.979859	-0.0618145	0.734687	0.999711
ENSMUSG00000008153	Clstn3	0.100452	0.763128	0.935221	0.435485	0.355811	0.628494	-0.0115969	0.972262	0.999711
ENSMUSG00000008167	Fbxw9	0.32736	0.0509227	0.401022	0.0867403	0.709007	0.874624	0.0796644	0.6271	0.999711
ENSMUSG00000008200	Fnbp4	-0.491758	0.0990965	0.501507	-0.696477	0.0974157	0.300191	0.363104	0.2179	0.999711
ENSMUSG00000008206	Cers4	0.241996	0.26507	0.692669	-0.681518	0.0267437	0.128228	0.201418	0.352589	0.999711
ENSMUSG00000008226	Scrn3	-0.0768878	0.680814	0.910913	0.430037	0.10129	0.306883	-0.221439	0.230147	0.999711
ENSMUSG00000008301	Phax	0.248458	0.112397	0.518771	0.242629	0.269041	0.539463	0.056586	0.71445	0.999711
ENSMUSG00000008305	Tle1	-0.0653724	0.702056	0.916799	0.197099	0.413225	0.679191	0.10973	0.518497	0.999711
ENSMUSG00000008318	Relt	-0.0358622	0.86577	0.961918	0.868216	0.00396775	0.0309537	0.406669	0.0674812	0.999711
ENSMUSG00000008333	Snrpb2	0.455225	0.0191722	0.271971	-0.27314	0.317773	0.591655	0.103567	0.591802	0.999711
ENSMUSG00000008348	Ubc	-0.0588572	0.727618	0.923903	0.427474	0.0733765	0.251783	-0.0994745	0.555531	0.999711
ENSMUSG00000008373	Prpf31	0.116175	0.415477	0.790133	-0.0215079	0.914146	0.966994	0.0181742	0.897025	0.999711
ENSMUSG00000008384	Sertad1	0.222513	0.499112	0.841175	-0.854526	0.0632389	0.229263	-0.120901	0.707005	0.999711
ENSMUSG00000008393	Carhsp1	0.0823681	0.809888	0.947673	2.63986	1.00951e-07	3.46986e-06	0.105516	0.758838	0.999711
ENSMUSG00000008398	Elk3	-0.429611	0.0895788	0.487901	-1.08184	0.0033584	0.0272747	-0.310969	0.216501	0.999711
ENSMUSG00000008429	Herpud2	0.189515	0.273191	0.696629	0.223305	0.359598	0.631409	-0.0210237	0.902734	0.999711
ENSMUSG00000008435	Rdh13	0.313857	0.218849	0.656131	-0.0103281	0.97715	0.99013	0.0534341	0.833266	0.999711
ENSMUSG00000008438	Adam21	0.195597	0.71729	0.921623	0.121941	0.86952	0.948015	0.357394	0.464592	0.999711
ENSMUSG00000008450	Nutf2	0.0498605	0.754722	0.93321	-0.232474	0.294998	0.568063	-0.129369	0.407726	0.999711
ENSMUSG00000008475	Arpc5	0.275385	0.134458	0.556437	-0.436958	0.0919451	0.290008	0.0465461	0.798806	0.999711
ENSMUSG00000008489	Elavl2	-0.0326749	0.875865	0.964889	1.12997	0.000125811	0.00185978	-0.185446	0.36894	0.999711
ENSMUSG00000008496	Pou2f2	-0.393375	0.166157	0.594512	-0.587181	0.16297	0.407077	0.354973	0.203588	0.999711
ENSMUSG00000008540	Mgst1	-0.0541402	0.890186	0.970426	2.00567	0.00039815	0.00480858	0.330011	0.402868	0.999711
ENSMUSG00000008575	Nfib	-0.193505	0.287204	0.709831	-0.996509	0.000113555	0.00170187	-0.0175398	0.923001	0.999711
ENSMUSG00000008604	Ubqln4	-0.290702	0.0623512	0.422222	-0.104756	0.635058	0.836057	-0.31888	0.0421947	0.999711
ENSMUSG00000008658	Rbfox1	0.124417	0.459774	0.81894	0.571204	0.0163192	0.0910737	-0.0835271	0.618662	0.999711
ENSMUSG00000008668	Rps18	-0.128015	0.567025	0.868527	-0.0904316	0.774989	0.908278	0.195186	0.384169	0.999711
ENSMUSG00000008682	Rpl10	-0.387999	0.164192	0.592609	-0.970018	0.0117565	0.071485	0.268354	0.284753	0.999711
ENSMUSG00000008683	Rps15a	-0.220949	0.163603	0.591885	0.0863538	0.699944	0.87001	-0.0140101	0.929578	0.999711
ENSMUSG00000008690	Ncaph2	-0.0784236	0.56878	0.868684	0.0583223	0.763987	0.902684	-0.0596107	0.668543	0.999711
ENSMUSG00000008730	Hipk1	-0.01697	0.918109	0.978507	0.149558	0.524121	0.761006	-0.0745233	0.652108	0.999711
ENSMUSG00000008734	Gprc5b	-0.185532	0.410591	0.789053	0.517614	0.10705	0.317691	0.048378	0.83157	0.999711
ENSMUSG00000008763	Man1a2	0.00561298	0.969837	0.991994	0.127073	0.546058	0.776108	-0.0286392	0.846933	0.999711
ENSMUSG00000008822	Acyp1	0.135699	0.514116	0.847915	0.468769	0.104936	0.313604	-0.260847	0.201542	0.999711
ENSMUSG00000008845	Cd163	-0.245024	0.425874	0.797514	0.857698	0.0515767	0.202331	0.280003	0.317821	0.999711
ENSMUSG00000008855	Hdac5	-0.316918	0.105129	0.508031	0.175683	0.527172	0.762526	-0.125666	0.53073	0.999711
ENSMUSG00000008859	Rala	-0.0818057	0.697975	0.915619	-0.0829915	0.780426	0.910249	-0.257942	0.22063	0.999711
ENSMUSG00000008892	Vdac3	0.418473	0.00445089	0.150772	0.448575	0.0297113	0.138397	0.129543	0.373373	0.999711
ENSMUSG00000008958	Vps72	-0.377595	0.077641	0.462099	0.202304	0.487749	0.73718	-0.233396	0.252025	0.999711
ENSMUSG00000008976	Gabpa	0.191728	0.409807	0.789053	0.253422	0.442603	0.701914	-0.231464	0.309472	0.999711
ENSMUSG00000008999	Bmp7	0.130289	0.630277	0.892502	0.694861	0.0835578	0.27416	-0.0646121	0.81277	0.999711
ENSMUSG00000009013	Dynll1	-0.00683756	0.97023	0.99216	-0.909602	0.000451638	0.00534428	-0.343531	0.0605388	0.999711
ENSMUSG00000009030	Pdcl	0.031903	0.853299	0.958966	0.472964	0.0511674	0.201262	-0.28068	0.0993989	0.999711
ENSMUSG00000009035	Tmem184b	0.0244615	0.906384	0.97505	-0.0547077	0.854022	0.942522	0.112487	0.600922	0.999711
ENSMUSG00000009073	Nf2	-0.0416948	0.800676	0.945778	-0.290118	0.217369	0.476199	-0.0832983	0.6171	0.999711
ENSMUSG00000009075	Cabp7	0.121764	0.61738	0.890621	-0.482847	0.169502	0.415886	0.258453	0.307073	0.999711
ENSMUSG00000009076	Zmat5	-0.334864	0.116857	0.523344	0.377556	0.198749	0.454325	-0.13975	0.507533	0.999711
ENSMUSG00000009079	Ewsr1	0.668491	0.00859372	0.201147	0.475235	0.183827	0.435269	0.25295	0.317341	0.999711
ENSMUSG00000009090	Ap1b1	0.360008	0.0415037	0.370629	0.254643	0.307383	0.581117	0.0428717	0.808088	0.999711
ENSMUSG00000009092	Derl3	0.324189	0.329786	0.741635	0.797522	0.0862047	0.279489	-0.415887	0.240606	0.999711
ENSMUSG00000009112	Bcl2l13	0.0962566	0.506568	0.844361	-0.064218	0.754461	0.897012	0.0877692	0.543358	0.999711
ENSMUSG00000009207	Lnpk	0.37822	0.260326	0.689692	-0.310651	0.512759	0.75455	-0.207118	0.536874	0.999711
ENSMUSG00000009214	Tmem8c	0.488018	0.0994827	0.501958	-1.20434	0.00724212	0.0495424	0.267643	0.416033	0.999711
ENSMUSG00000009216	Fam163b	0.0553024	0.754935	0.93321	-0.60988	0.014871	0.0850518	0.00471621	0.978679	0.999711
ENSMUSG00000009291	Pttg1ip	0.209335	0.350093	0.755493	0.0491364	0.878311	0.952136	0.147717	0.509229	0.999711
ENSMUSG00000009292	Trpm2	-0.186165	0.413971	0.789507	0.0219354	0.945771	0.978772	-0.0056806	0.980199	0.999711
ENSMUSG00000009293	Ube2g2	0.292325	0.0311729	0.331443	0.235553	0.212039	0.471422	0.0733333	0.583522	0.999711
ENSMUSG00000009356	Lpo	0.126748	0.693331	0.915279	-1.61054	0.00138266	0.0135643	-0.231207	0.494955	0.999711
ENSMUSG00000009376	Met	-0.0151368	0.956647	0.988137	-2.02788	5.4372e-07	1.56311e-05	-0.196592	0.480505	0.999711
ENSMUSG00000009394	Syn2	0.0313892	0.876894	0.965112	-0.305821	0.285876	0.55823	-0.0225275	0.911439	0.999711
ENSMUSG00000009406	Elk1	-0.105539	0.406339	0.78827	-0.252396	0.160659	0.404132	-0.0879113	0.482835	0.999711
ENSMUSG00000009418	Nav1	-0.0569014	0.756245	0.933817	-0.555565	0.0322837	0.146638	0.0146817	0.936048	0.999711
ENSMUSG00000009470	Tnpo1	0.318405	0.343653	0.751627	0.377837	0.428183	0.690853	0.151798	0.651106	0.999711
ENSMUSG00000009535	Rnmt	0.0304341	0.833409	0.953727	0.0934614	0.64599	0.841776	0.152417	0.286173	0.999711
ENSMUSG00000009545	Kcnq1	1.17931	0.0397666	0.365146	-1.24439	0.143696	0.378747	1.42818	0.0172296	0.999711
ENSMUSG00000009549	Srp14	0.0363479	0.844129	0.957075	-0.0524784	0.840649	0.936475	0.0906091	0.623448	0.999711
ENSMUSG00000009551	6330409D20Rik	0.184796	0.480071	0.832243	0.606264	0.077328	0.260503	0.0243794	0.924485	0.999711
ENSMUSG00000009555	Cdk9	-0.0822806	0.638886	0.895652	-0.4063	0.0998461	0.304543	0.0845523	0.627629	0.999711
ENSMUSG00000009563	Tor2a	0.358704	0.102765	0.505078	-0.185802	0.548964	0.778555	0.228293	0.297368	0.999711
ENSMUSG00000009566	Fpgs	0.177772	0.54172	0.858899	-0.217766	0.59261	0.807886	0.345111	0.22275	0.999711
ENSMUSG00000009569	Mkl2	0.352564	0.0709152	0.444818	-0.967085	0.000466019	0.00549606	-0.0985987	0.612498	0.999711
ENSMUSG00000009575	Cbx5	-0.164895	0.355274	0.758278	0.164853	0.513335	0.754781	-0.218598	0.220431	0.999711
ENSMUSG00000009585	Apobec3	0.391544	0.248244	0.678399	1.17404	0.0380028	0.164534	-0.126665	0.710956	0.999711
ENSMUSG00000009614	Sardh	-0.242151	0.609713	0.889152	-0.811637	0.235834	0.499167	-0.128083	0.790538	0.999711
ENSMUSG00000009621	Vav2	0.236096	0.35988	0.761927	0.849331	0.0203405	0.105244	-0.0638784	0.807966	0.999711
ENSMUSG00000009628	Tex15	0.170369	0.664128	0.902519	0.187759	0.732433	0.884589	0.572082	0.120613	0.999711
ENSMUSG00000009630	Ppp2cb	0.0854013	0.686367	0.91375	0.142599	0.63277	0.835178	-0.07683	0.715727	0.999711
ENSMUSG00000009633	G0s2	-0.263001	0.334205	0.744809	1.13579	0.00274884	0.0233197	-0.209768	0.450427	0.999711
ENSMUSG00000009640	Dmap1	0.107928	0.649729	0.898235	0.127182	0.699058	0.869668	-0.111911	0.632156	0.999711
ENSMUSG00000009647	Mcu	0.651002	0.0034595	0.13604	0.141563	0.650302	0.844536	-0.215071	0.328231	0.999711
ENSMUSG00000009681	Bcr	-0.156644	0.278965	0.70362	0.65247	0.00145983	0.0141338	-0.132377	0.36268	0.999711
ENSMUSG00000009687	Fxyd5	-0.175671	0.646239	0.89702	-1.04194	0.0602383	0.222945	0.257106	0.502836	0.999711
ENSMUSG00000009731	Kcnd1	-0.0691407	0.66785	0.903448	-0.0958343	0.675682	0.858055	0.042849	0.792513	0.999711
ENSMUSG00000009733	Tfcp2	0.154435	0.393721	0.780907	0.331223	0.191069	0.445373	-0.0763877	0.666136	0.999711
ENSMUSG00000009734	Pou6f2	-0.77033	0.030849	0.330623	-1.4384	0.00389036	0.0304513	-0.348743	0.297087	0.999711
ENSMUSG00000009739	Pou6f1	0.119994	0.40471	0.787244	0.0520502	0.799502	0.919934	0.0783449	0.589945	0.999711
ENSMUSG00000009741	Ubp1	-0.192539	0.348211	0.754712	-0.178607	0.536691	0.769249	0.15734	0.437112	0.999711
ENSMUSG00000009828	Ick	0.109484	0.57869	0.872972	-0.0901552	0.751313	0.895764	0.043148	0.826767	0.999711
ENSMUSG00000009863	Sdhb	0.216334	0.159399	0.587529	0.163374	0.451738	0.709142	0.0665287	0.664908	0.999711
ENSMUSG00000009876	Cox4i2	-0.344536	0.502187	0.84245	-0.213715	0.787471	0.913313	0.253779	0.643151	0.999711
ENSMUSG00000009894	Snap47	0.386258	0.0785309	0.463315	0.281844	0.363161	0.633734	-0.0116581	0.957558	0.999711
ENSMUSG00000009905	Kdsr	0.57688	0.00414188	0.148575	-0.0666569	0.814278	0.925715	0.28844	0.149747	0.999711
ENSMUSG00000009907	Vps4b	0.146786	0.337251	0.747568	-0.0557013	0.794821	0.917172	0.0367751	0.806562	0.999711
ENSMUSG00000009927	Rps25	-0.356764	0.0888523	0.487522	-0.0736869	0.803298	0.921283	0.11077	0.598171	0.999711
ENSMUSG00000009995	Taz	-0.400602	0.0818847	0.47197	-0.448118	0.168088	0.413815	0.161847	0.478578	0.999711
ENSMUSG00000010025	Aldh3a2	0.14612	0.259168	0.68943	-0.169812	0.350537	0.624016	-0.102659	0.420013	0.999711
ENSMUSG00000010044	Zmynd10	0.427067	0.221414	0.658179	0.266227	0.59728	0.810795	-0.139871	0.689916	0.999711
ENSMUSG00000010045	Tmem115	0.129485	0.490799	0.837031	-0.163552	0.538976	0.77111	0.107811	0.569265	0.999711
ENSMUSG00000010047	Hyal2	-0.06083	0.830293	0.953149	0.141404	0.724206	0.880427	-0.0165242	0.954635	0.999711
ENSMUSG00000010048	Ifrd2	-0.118935	0.707194	0.918033	-0.0759187	0.862075	0.94444	0.199862	0.514295	0.999711
ENSMUSG00000010054	Tusc2	-0.0169452	0.940764	0.984053	0.0924821	0.773617	0.907502	-0.135931	0.549834	0.999711
ENSMUSG00000010057	Nprl2	-0.0668275	0.757423	0.934017	-0.205082	0.501482	0.748059	0.0694599	0.746789	0.999711
ENSMUSG00000010064	Slc38a3	-0.30612	0.530715	0.854028	-0.310794	0.657418	0.848797	-0.404033	0.40921	0.999711
ENSMUSG00000010066	Cacna2d2	-1.02543	1.61038e-06	0.000870721	1.60241	1.26677e-07	4.33291e-06	-0.0194435	0.927329	0.999711
ENSMUSG00000010067	Rassf1	0.16782	0.645724	0.89702	0.261807	0.603622	0.815229	-0.227075	0.506163	0.999711
ENSMUSG00000010086	Rnf112	0.00655704	0.971547	0.992371	-0.903007	0.000514934	0.0059433	-0.0141677	0.938292	0.999711
ENSMUSG00000010095	Slc3a2	0.236792	0.271733	0.696521	-0.215171	0.480159	0.731288	0.25071	0.245595	0.999711
ENSMUSG00000010097	Nxf1	-0.0909494	0.47393	0.827783	0.148422	0.406992	0.674069	-0.0427828	0.735709	0.999711
ENSMUSG00000010110	Stx5a	-0.23666	0.258476	0.688653	-0.394724	0.180436	0.430867	0.0663388	0.748649	0.999711
ENSMUSG00000010136	Pifo	0.55947	0.197996	0.635245	-0.66848	0.258685	0.526127	0.52067	0.188846	0.999711
ENSMUSG00000010142	Tnfrsf13b	-0.267793	0.506889	0.844594	1.22174	0.0625789	0.227699	-0.272483	0.522953	0.999711
ENSMUSG00000010154	Spire2	0.151594	0.45335	0.814527	0.714942	0.0117358	0.0714516	-0.0879433	0.668628	0.999711
ENSMUSG00000010175	Prox1	0.076452	0.640234	0.895652	0.599344	0.00875088	0.0570858	0.0191815	0.902517	0.999711
ENSMUSG00000010205	Raver1	-0.0806233	0.709594	0.91888	-0.141838	0.641485	0.839352	-0.0565955	0.791301	0.999711
ENSMUSG00000010277	2610507B11Rik	-0.155478	0.410803	0.789053	-0.038161	0.886699	0.955044	0.0623557	0.741842	0.999711
ENSMUSG00000010290	AI597479	-0.253964	0.161227	0.591013	0.0235067	0.926737	0.97102	0.00318511	0.985907	0.999711
ENSMUSG00000010307	Tmem86a	0.326931	0.12752	0.543057	-0.280987	0.358079	0.630338	0.182752	0.409048	0.999711
ENSMUSG00000010358	Ifi35	0.313463	0.38526	0.776912	1.0612	0.0609368	0.224489	0.223155	0.561722	0.999711
ENSMUSG00000010362	Rdm1	-0.712308	0.0168923	0.258354	0.605246	0.174055	0.421584	-0.454893	0.139324	0.999711
ENSMUSG00000010376	Nedd8	0.148124	0.469881	0.825166	0.137205	0.635381	0.836057	-0.00995211	0.961185	0.999711
ENSMUSG00000010392	Gosr1	0.265638	0.136002	0.559366	0.261064	0.298126	0.571612	-0.00633828	0.971312	0.999711
ENSMUSG00000010406	Mrpl52	-0.272879	0.155798	0.583045	0.674918	0.0120592	0.0726936	-0.428314	0.0267275	0.999711
ENSMUSG00000010453	Kansl3	-0.0672255	0.656605	0.90125	-0.135016	0.52865	0.763563	0.216541	0.150617	0.999711
ENSMUSG00000010461	Eya4	-0.28516	0.350852	0.755493	3.50266	4.93294e-15	7.39931e-13	-0.475366	0.0849745	0.999711
ENSMUSG00000010505	Myt1	-0.00571933	0.983854	0.996419	-0.0405973	0.919722	0.969188	0.486966	0.0769415	0.999711
ENSMUSG00000010517	Faf1	-0.0430339	0.791351	0.942381	0.243572	0.285951	0.558242	0.0715089	0.656517	0.999711
ENSMUSG00000010538	Tsacc	-0.0386014	0.898595	0.972629	-0.751303	0.0621658	0.226958	0.336589	0.212697	0.999711
ENSMUSG00000010554	Mettl16	-0.735442	0.00244744	0.111347	0.433503	0.203607	0.459303	-0.463852	0.0542993	0.999711
ENSMUSG00000010592	Dazl	0.367882	0.172892	0.60315	0.701971	0.0587795	0.2193	-0.231592	0.365948	0.999711
ENSMUSG00000010607	Pigyl	-0.0917857	0.617932	0.890621	0.49364	0.0523504	0.20356	-0.241567	0.186361	0.999711
ENSMUSG00000010608	Rbm25	0.222115	0.0924973	0.491493	-0.0680671	0.71495	0.877552	0.148243	0.259997	0.999711
ENSMUSG00000010609	Psen2	0.0270024	0.903037	0.974581	0.0592495	0.850454	0.941096	0.205541	0.355849	0.999711
ENSMUSG00000010660	Plcd1	-0.258963	0.371886	0.767352	-0.885388	0.0351769	0.156048	0.184256	0.529279	0.999711
ENSMUSG00000010663	Fads1	-0.222224	0.531473	0.854298	-0.268497	0.59328	0.808283	0.127862	0.71901	0.999711
ENSMUSG00000010721	Lmbr1	0.0405402	0.834792	0.954465	-0.161966	0.555724	0.782976	0.149128	0.443491	0.999711
ENSMUSG00000010751	Tnfrsf22	-0.0727758	0.848575	0.958174	0.04479	0.934678	0.974103	0.112031	0.767679	0.999711
ENSMUSG00000010755	Cars	-0.081125	0.723756	0.923197	-0.339836	0.293503	0.566598	-0.108592	0.634814	0.999711
ENSMUSG00000010797	Wnt2	-0.323646	0.244375	0.67507	0.792902	0.0414306	0.174224	-0.369332	0.175203	0.999711
ENSMUSG00000010803	Gabra1	0.101133	0.648901	0.898235	0.276827	0.378274	0.647789	-0.114692	0.60562	0.999711
ENSMUSG00000010911	Apip	-0.0616386	0.737315	0.927739	-0.160043	0.535289	0.768337	-0.126206	0.488878	0.999711
ENSMUSG00000010914	Pdhx	0.151173	0.283436	0.707106	0.00182187	0.992604	0.996502	0.0261338	0.851027	0.999711
ENSMUSG00000010936	Vac14	0.0370846	0.8288	0.952968	0.684268	0.00425915	0.0327767	-0.0284865	0.866112	0.999711
ENSMUSG00000011096	Akt1s1	-0.238532	0.43088	0.800543	-0.389249	0.357678	0.630046	-0.142209	0.642328	0.999711
ENSMUSG00000011114	Tbrg1	0.173037	0.199724	0.638117	-0.0906576	0.631958	0.834812	-0.104722	0.432255	0.999711
ENSMUSG00000011148	Adssl1	-0.461373	0.0134917	0.234137	1.82391	2.38467e-12	2.20551e-10	-0.162427	0.370993	0.999711
ENSMUSG00000011158	Brf1	0.0508994	0.791688	0.942544	0.0494535	0.854836	0.942546	0.0409722	0.832556	0.999711
ENSMUSG00000011171	Vipr2	-0.165906	0.669288	0.904234	1.29356	0.0315329	0.144065	0.0743321	0.846788	0.999711
ENSMUSG00000011179	Odc1	0.0433769	0.832332	0.953639	0.385486	0.178362	0.427668	-0.133404	0.510695	0.999711
ENSMUSG00000011254	Thg1l	0.50431	0.0453155	0.382926	-0.126905	0.719291	0.878981	-0.21284	0.39171	0.999711
ENSMUSG00000011256	Adam19	-0.0524451	0.857015	0.959862	-0.770965	0.0623141	0.227064	-0.238234	0.413753	0.999711
ENSMUSG00000011257	Pabpc4	-0.266146	0.230111	0.667217	-0.173457	0.588141	0.80515	-0.443036	0.0634689	0.999711
ENSMUSG00000011306	Sugp1	0.156748	0.424867	0.79669	0.0329226	0.904593	0.963246	0.224417	0.245812	0.999711
ENSMUSG00000011382	Dhdh	0.426532	0.254569	0.685789	0.00344334	0.995061	0.997616	0.18847	0.614586	0.999711
ENSMUSG00000011427	Zfp790	0.106267	0.485488	0.834452	0.538433	0.0117718	0.0714852	-0.0248807	0.865703	0.999711
ENSMUSG00000011589	Fsd1	0.156576	0.447549	0.810527	-0.0956548	0.741949	0.889487	-0.161342	0.435542	0.999711
ENSMUSG00000011658	Fuz	-0.355137	0.210613	0.649155	-0.0413402	0.914038	0.966994	-0.145758	0.597659	0.999711
ENSMUSG00000011751	Sptbn4	0.173836	0.563539	0.867144	0.215504	0.61705	0.826299	0.120216	0.699406	0.999711
ENSMUSG00000011752	Pgam1	0.250574	0.300221	0.720947	0.432712	0.194455	0.449847	-0.188865	0.421365	0.999711
ENSMUSG00000011831	Evi5	0.0367405	0.849733	0.958675	-0.0117785	0.965821	0.986356	-0.0995812	0.6079	0.999711
ENSMUSG00000011832	Evi5l	0.0759759	0.655044	0.900239	0.451954	0.061095	0.224954	0.0131103	0.939107	0.999711
ENSMUSG00000011837	Snapc2	0.137463	0.576292	0.871786	0.344493	0.313925	0.587358	-0.0786122	0.743612	0.999711
ENSMUSG00000011877	Git1	-0.142241	0.420226	0.792639	-0.672082	0.00741829	0.0505263	-0.129595	0.467885	0.999711
ENSMUSG00000011884	Gltp	0.131357	0.640738	0.895858	0.827394	0.0420718	0.175973	-0.184641	0.514658	0.999711
ENSMUSG00000011958	Bnip2	-0.0828957	0.705617	0.917805	-0.563078	0.073783	0.25265	0.248147	0.261853	0.999711
ENSMUSG00000011960	Ccnt1	0.116417	0.4079	0.788647	0.00541557	0.978299	0.990702	0.113735	0.414928	0.999711
ENSMUSG00000012017	Scarf2	-0.112031	0.757879	0.934129	-0.380254	0.493282	0.741347	0.841317	0.0503271	0.999711
ENSMUSG00000012076	Brms1l	-0.0671703	0.705438	0.917735	0.230529	0.353941	0.626972	-0.357883	0.0401403	0.999711
ENSMUSG00000012114	Med15	0.104483	0.461439	0.819995	-0.231997	0.242126	0.506691	0.130084	0.347179	0.999711
ENSMUSG00000012117	Dhdds	0.220613	0.0698339	0.442782	0.150825	0.374504	0.644223	0.0853387	0.471774	0.999711
ENSMUSG00000012126	Ubxn11	0.297381	0.075455	0.455843	-0.993268	1.94523e-05	0.000372465	0.0372795	0.819614	0.999711
ENSMUSG00000012296	Tjap1	-0.642067	0.0195735	0.273795	-0.550424	0.158655	0.401578	-0.260312	0.338316	0.999711
ENSMUSG00000012405	Rpl15	0.122452	0.508056	0.845649	0.142068	0.585916	0.803277	-0.0703257	0.703391	0.999711
ENSMUSG00000012422	Tmem167	0.067475	0.715399	0.921399	0.335815	0.199014	0.45462	-0.150381	0.415752	0.999711
ENSMUSG00000012429	Mplkip	-0.302855	0.189144	0.623882	0.293209	0.354869	0.627855	-0.111064	0.609907	0.999711
ENSMUSG00000012443	Kif11	-0.761678	0.0140651	0.239089	-0.590104	0.180611	0.431002	-0.295887	0.302574	0.999711
ENSMUSG00000012483	Rpa3	0.0962361	0.688237	0.913892	0.329171	0.323227	0.597021	0.0900149	0.700637	0.999711
ENSMUSG00000012535	Tnpo3	-0.107319	0.424432	0.796193	-0.130582	0.489557	0.738828	-0.0183569	0.889875	0.999711
ENSMUSG00000012609	Ttll5	-0.314984	0.107884	0.51134	0.026191	0.92454	0.970654	-0.0602594	0.756436	0.999711
ENSMUSG00000012640	Zfp715	0.0292316	0.913633	0.97709	0.288239	0.44568	0.704347	-0.00214989	0.993496	0.999711
ENSMUSG00000012705	Retn	-0.882282	0.0229618	0.292124	1.08819	0.0291727	0.136521	0.262346	0.389941	0.999711
ENSMUSG00000012848	Rps5	-0.112703	0.529737	0.853906	0.131313	0.604686	0.816274	0.0873978	0.626497	0.999711
ENSMUSG00000013033	Adgrl1	0.13228	0.493541	0.837884	-0.460222	0.0925619	0.291169	0.0415352	0.830037	0.999711
ENSMUSG00000013076	Amotl1	-0.0399011	0.895013	0.971869	1.72222	6.97101e-05	0.00112384	-0.0531051	0.861011	0.999711
ENSMUSG00000013089	Etv5	0.0881077	0.519921	0.849593	-1.09633	1.45311e-08	6.06168e-07	-0.167247	0.216347	0.999711
ENSMUSG00000013150	Gfod2	-0.102117	0.597756	0.882974	-0.0609683	0.822148	0.92908	-0.0660722	0.729255	0.999711
ENSMUSG00000013155	Enkd1	0.160608	0.548712	0.860939	-0.384173	0.284478	0.556836	0.0671842	0.792607	0.999711
ENSMUSG00000013160	Atp6v0d1	0.229634	0.213833	0.651689	0.08366	0.748528	0.89386	-0.0162002	0.930049	0.999711
ENSMUSG00000013236	Ptprs	0.274876	0.140542	0.567041	-0.457738	0.0830336	0.273241	0.25818	0.16732	0.999711
ENSMUSG00000013275	Slc41a1	0.0206179	0.897243	0.972293	0.504692	0.0259796	0.12529	0.17913	0.262473	0.999711
ENSMUSG00000013367	Iglon5	-0.224986	0.333819	0.744421	1.27955	0.000107215	0.00163297	0.113275	0.62509	0.999711
ENSMUSG00000013419	Zfp651	-0.109993	0.604973	0.886907	-0.0601185	0.842744	0.937657	-0.0311394	0.885493	0.999711
ENSMUSG00000013465	Nelfb	0.0786945	0.464772	0.82134	0.310356	0.0405515	0.171709	-0.0894427	0.405665	0.999711
ENSMUSG00000013495	Tmem175	0.164483	0.535699	0.855974	-0.344376	0.358918	0.631103	0.0522359	0.843791	0.999711
ENSMUSG00000013523	Bcas1	-0.276104	0.489141	0.836029	-0.352606	0.53476	0.767969	0.186202	0.641842	0.999711
ENSMUSG00000013584	Aldh1a2	0.288075	0.384027	0.776004	0.858623	0.0994294	0.303733	-0.0473423	0.885604	0.999711
ENSMUSG00000013593	Ndufs2	-0.0163113	0.931248	0.981362	0.404891	0.129949	0.356871	-0.0232134	0.902319	0.999711
ENSMUSG00000013622	Atraid	0.0850567	0.687785	0.91385	0.0657372	0.826134	0.930394	0.429159	0.0434509	0.999711
ENSMUSG00000013629	Cad	-0.238815	0.306349	0.726185	-0.235749	0.477426	0.729289	-0.135824	0.56338	0.999711
ENSMUSG00000013646	Sh3bp5l	-0.35619	0.117107	0.523631	0.480044	0.133747	0.363327	-0.400398	0.0772445	0.999711
ENSMUSG00000013662	Atad1	0.562327	0.0170915	0.259194	0.0153042	0.963279	0.985454	0.154488	0.511016	0.999711
ENSMUSG00000013663	Pten	0.192301	0.24476	0.675075	-0.0236767	0.91927	0.96907	0.0230392	0.888927	0.999711
ENSMUSG00000013698	Pea15a	-0.126603	0.526221	0.85253	0.211408	0.454349	0.711353	-0.141729	0.478274	0.999711
ENSMUSG00000013701	Timm23	-0.153384	0.560853	0.865744	-0.167237	0.627458	0.831367	0.0455914	0.845342	0.999711
ENSMUSG00000013707	Tnfaip8l2	-0.399166	0.268697	0.694619	0.867333	0.111021	0.323931	-0.35753	0.329074	0.999711
ENSMUSG00000013736	Trnt1	0.308451	0.0407867	0.368457	0.0897876	0.669339	0.854906	0.046139	0.753149	0.999711
ENSMUSG00000013766	Ly6g6e	-0.0466631	0.896281	0.972286	-1.79742	0.00057137	0.00650012	-0.46047	0.193679	0.999711
ENSMUSG00000013787	Ehmt2	0.0474326	0.762324	0.9349	0.261945	0.239049	0.502638	-0.0760858	0.632925	0.999711
ENSMUSG00000013822	Elof1	-0.154543	0.362563	0.763309	0.177597	0.457628	0.713838	-0.170971	0.312887	0.999711
ENSMUSG00000013833	Med16	0.141408	0.411071	0.789129	0.160325	0.510929	0.753363	0.041344	0.813535	0.999711
ENSMUSG00000013846	St3gal1	-0.239259	0.357653	0.760074	-0.17473	0.636066	0.836465	-0.175965	0.497081	0.999711
ENSMUSG00000013858	Tmem259	0.125424	0.651433	0.898481	0.101409	0.802548	0.921283	0.0109835	0.970276	0.999711
ENSMUSG00000013878	Rnf170	0.217981	0.0959565	0.496487	0.155712	0.403704	0.671392	0.176717	0.161578	0.999711
ENSMUSG00000013921	Clip3	0.607719	0.000312094	0.0408891	0.394226	0.0965646	0.298686	0.00242198	0.988463	0.999711
ENSMUSG00000013936	Myl2	-0.721149	0.06427	0.428203	0.972357	0.115724	0.333131	-0.666587	0.103678	0.999711
ENSMUSG00000013973	Dedd	0.177075	0.536234	0.856634	0.164483	0.667122	0.853587	-0.0899569	0.722084	0.999711
ENSMUSG00000013997	Nit1	-0.311364	0.0158426	0.250879	0.152857	0.391786	0.659356	-0.178453	0.151879	0.999711
ENSMUSG00000014039	Prdm15	-0.902541	0.00267455	0.115716	-0.926405	0.0275375	0.131095	-0.0836839	0.773286	0.999711
ENSMUSG00000014074	Rnf168	0.00753944	0.954945	0.987409	0.245308	0.186255	0.438662	0.0140922	0.912702	0.999711
ENSMUSG00000014075	Tctex1d2	0.181944	0.473649	0.827493	0.259713	0.464085	0.719386	0.042123	0.86571	0.999711
ENSMUSG00000014077	Chp1	0.12724	0.411288	0.789129	-0.322131	0.140426	0.373814	-0.106761	0.488822	0.999711
ENSMUSG00000014164	Klhl3	-0.387117	0.239557	0.671813	-1.37065	0.00371048	0.0294201	0.104522	0.742042	0.999711
ENSMUSG00000014177	Tvp23b	-0.00206044	0.99239	0.998435	0.352322	0.24814	0.513748	-0.0654385	0.761966	0.999711
ENSMUSG00000014195	Dnajc7	0.192193	0.118746	0.525772	0.267667	0.122002	0.343433	0.171196	0.160792	0.999711
ENSMUSG00000014226	Cacybp	0.36462	0.0251303	0.301693	0.238578	0.29631	0.569606	-0.0717677	0.655955	0.999711
ENSMUSG00000014232	Cluap1	0.0187351	0.891799	0.970788	-0.0765593	0.689553	0.865666	0.0688751	0.608805	0.999711
ENSMUSG00000014243	Zswim7	0.570732	0.00608987	0.173579	0.29531	0.306438	0.580163	0.491884	0.0164433	0.999711
ENSMUSG00000014245	Pigl	0.303677	0.265985	0.693346	-0.248979	0.51839	0.758169	0.152617	0.562488	0.999711
ENSMUSG00000014294	Ndufa2	-0.155479	0.537296	0.857057	0.348867	0.327438	0.600538	0.00690083	0.978145	0.999711
ENSMUSG00000014301	Pam16	-0.040741	0.889595	0.970426	0.766573	0.0524623	0.203846	-0.204805	0.478624	0.999711
ENSMUSG00000014303	Glis2	-0.0112028	0.965161	0.990454	0.241727	0.511207	0.753363	0.239303	0.356315	0.999711
ENSMUSG00000014313	Cox6c	-0.0248532	0.935735	0.983146	0.418366	0.337338	0.610098	0.216622	0.482415	0.999711
ENSMUSG00000014329	Bicc1	-0.0208494	0.921601	0.979184	-0.598798	0.0635839	0.230142	0.0574557	0.78179	0.999711
ENSMUSG00000014349	Ube2z	0.0798671	0.682742	0.911973	0.385559	0.161692	0.405831	-0.0651961	0.737677	0.999711
ENSMUSG00000014353	Tmem87b	0.200612	0.318735	0.735666	-0.166238	0.559796	0.784897	0.170957	0.395923	0.999711
ENSMUSG00000014355	Anapc1	-0.0658741	0.680062	0.910389	-0.0749365	0.740692	0.888906	0.0241258	0.879302	0.999711
ENSMUSG00000014361	Mertk	-0.185088	0.610253	0.889152	-0.778346	0.135043	0.365516	0.207473	0.568121	0.999711
ENSMUSG00000014402	Tsg101	0.168018	0.256044	0.686083	0.18084	0.383462	0.653092	0.194316	0.184835	0.999711
ENSMUSG00000014418	Hps5	-0.211366	0.502311	0.84245	-0.682798	0.134329	0.364272	0.20125	0.521028	0.999711
ENSMUSG00000014426	Map3k4	-0.0328625	0.87666	0.965103	0.209543	0.48275	0.733279	0.0524981	0.802888	0.999711
ENSMUSG00000014470	Rnf166	-0.206898	0.259775	0.689691	0.122406	0.63497	0.836057	-0.147691	0.417549	0.999711
ENSMUSG00000014496	Ankrd28	0.168333	0.497656	0.840024	-0.634843	0.0718189	0.248555	0.324674	0.187286	0.999711
ENSMUSG00000014498	Ankrd52	-0.298503	0.308964	0.728518	-0.481195	0.249232	0.515205	0.280065	0.330164	0.999711
ENSMUSG00000014503	Pkd2l2	-0.390107	0.0800601	0.466596	0.190695	0.532839	0.766552	-0.268225	0.192471	0.999711
ENSMUSG00000014504	Srp19	0.350696	0.109916	0.514695	0.38198	0.216856	0.475465	0.013837	0.949512	0.999711
ENSMUSG00000014547	Wdfy2	-1.11818	0.00169921	0.0911738	-2.07163	0.00019859	0.00272367	0.60171	0.0729045	0.999711
ENSMUSG00000014550	Rbsn	0.179203	0.183877	0.617832	0.303072	0.11064	0.32323	-0.0132472	0.921065	0.999711
ENSMUSG00000014551	Mrps25	-0.266394	0.109806	0.514695	0.0579643	0.804573	0.921691	-0.452948	0.00632104	0.999711
ENSMUSG00000014554	Dguok	-0.340475	0.0722603	0.447899	0.619342	0.0187129	0.0999493	0.122437	0.504595	0.999711
ENSMUSG00000014592	Camta1	0.119679	0.430136	0.800543	0.402207	0.0606244	0.223842	-0.0866494	0.566685	0.999711
ENSMUSG00000014599	Csf1	0.0924866	0.657912	0.90125	-1.13002	0.000338134	0.00418441	-0.0278839	0.893762	0.999711
ENSMUSG00000014601	Strip1	-0.0408904	0.802367	0.946218	-0.56237	0.0149489	0.0853233	-0.0760601	0.641165	0.999711
ENSMUSG00000014602	Kif1a	0.164754	0.516253	0.848251	-0.0487951	0.891852	0.956927	0.169873	0.50343	0.999711
ENSMUSG00000014606	Slc25a11	0.133026	0.483373	0.833285	0.454759	0.0894528	0.285287	0.0771355	0.683312	0.999711
ENSMUSG00000014633	Cmc2	0.0182651	0.915288	0.977831	0.400189	0.0908991	0.288053	-0.118392	0.477799	0.999711
ENSMUSG00000014668	Chfr	0.0486169	0.765	0.935976	-0.410535	0.0706938	0.246491	0.141961	0.360955	0.999711
ENSMUSG00000014748	Tex261	0.0763326	0.591479	0.879254	-0.101	0.617395	0.826414	-0.0485749	0.73497	0.999711
ENSMUSG00000014763	Fam120b	-0.3431	0.146275	0.573637	0.104801	0.752714	0.896348	-0.233877	0.318403	0.999711
ENSMUSG00000014767	Tbp	0.284814	0.158148	0.585349	0.178074	0.524227	0.761006	0.154146	0.426677	0.999711
ENSMUSG00000014769	Psmb1	0.16539	0.286371	0.708753	0.129571	0.554426	0.782417	0.114592	0.460015	0.999711
ENSMUSG00000014773	Dll1	0.0850664	0.726874	0.923903	1.7095	5.47375e-06	0.000123714	0.213576	0.402488	0.999711
ENSMUSG00000014776	Nol3	-0.142109	0.610429	0.889152	0.230402	0.54299	0.774252	-0.361408	0.200092	0.999711
ENSMUSG00000014778	Fhod1	-0.40654	0.287618	0.710478	0.79452	0.167049	0.412453	0.0229693	0.955253	0.999711
ENSMUSG00000014786	Slc9a5	0.189071	0.412493	0.789507	-0.43894	0.182294	0.433033	0.363409	0.124045	0.999711
ENSMUSG00000014813	Stc1	0.0597733	0.787366	0.940829	0.258833	0.406816	0.673857	0.240002	0.251608	0.999711
ENSMUSG00000014837	4931428F04Rik	-0.154085	0.533108	0.85498	-0.0941049	0.783477	0.911655	-0.323657	0.179354	0.999711
ENSMUSG00000014846	Tppp3	-0.293736	0.104385	0.507267	-0.917134	0.00033699	0.00417761	-0.161852	0.367375	0.999711
ENSMUSG00000014850	Msh3	-0.0167754	0.932141	0.981503	-0.209501	0.449112	0.706855	0.274175	0.157875	0.999711
ENSMUSG00000014852	Adamts13	-0.0865016	0.727012	0.923903	-1.64432	1.38977e-06	3.63149e-05	-0.250814	0.281472	0.999711
ENSMUSG00000014856	Tmem208	-0.231156	0.273638	0.697136	-0.0300679	0.919761	0.969188	-0.0349462	0.869038	0.999711
ENSMUSG00000014859	E2f4	0.151876	0.292433	0.713669	0.24204	0.226717	0.489346	0.0434069	0.756648	0.999711
ENSMUSG00000014867	Surf4	0.501483	0.0155541	0.248759	-0.166315	0.569829	0.79188	-0.0329082	0.873838	0.999711
ENSMUSG00000014873	Surf2	0.255104	0.256908	0.686487	0.619967	0.0482164	0.19372	0.015753	0.942804	0.999711
ENSMUSG00000014905	Dnajb9	0.448998	0.0690554	0.440663	0.335958	0.335029	0.60818	0.112378	0.649099	0.999711
ENSMUSG00000014907	Naf1	-0.00393517	0.988831	0.997401	0.0192348	0.96114	0.984675	0.0126334	0.963648	0.999711
ENSMUSG00000014932	Yes1	0.249332	0.500253	0.841719	2.14659	7.03647e-05	0.00113309	-0.0289646	0.938643	0.999711
ENSMUSG00000014956	Ppp1cb	0.351678	0.0785961	0.463315	0.35664	0.206535	0.463961	-0.096096	0.630007	0.999711
ENSMUSG00000014959	Gorasp2	0.242704	0.128033	0.543579	-0.0866462	0.699249	0.869668	0.0582865	0.712322	0.999711
ENSMUSG00000014980	Tsen15	0.113549	0.545107	0.860305	0.0620103	0.80975	0.923658	-0.0606123	0.736106	0.999711
ENSMUSG00000015002	Efr3a	-0.0487366	0.728259	0.924245	0.0732919	0.711364	0.875717	-0.165793	0.235464	0.999711
ENSMUSG00000015013	Trappc2l	-0.191692	0.294052	0.715059	0.0168075	0.948009	0.979559	-0.0239978	0.895265	0.999711
ENSMUSG00000015016	Acsf3	-0.142143	0.574057	0.871524	0.189778	0.590307	0.806309	-0.198363	0.430752	0.999711
ENSMUSG00000015023	Ddx19a	-0.105287	0.545749	0.860305	0.193114	0.439396	0.699391	-0.0212741	0.903558	0.999711
ENSMUSG00000015027	Galns	0.597117	0.0184208	0.26975	-0.227763	0.525381	0.761269	0.398002	0.119588	0.999711
ENSMUSG00000015083	C8g	-0.220223	0.416998	0.790795	-0.290475	0.441353	0.701429	0.489828	0.0685829	0.999711
ENSMUSG00000015085	Entpd2	-0.367539	0.344086	0.751812	0.466851	0.417911	0.683139	-0.105055	0.79106	0.999711
ENSMUSG00000015087	Rabl6	-0.311944	0.082514	0.473317	-0.0894501	0.724973	0.881015	-0.211592	0.240782	0.999711
ENSMUSG00000015090	Ptgds	-0.112793	0.790552	0.941989	0.0434003	0.942408	0.977107	0.153939	0.717044	0.999711
ENSMUSG00000015092	Edf1	-0.0829789	0.658774	0.901598	0.0990787	0.706994	0.873751	-0.267041	0.154976	0.999711
ENSMUSG00000015094	Npdc1	0.142824	0.522073	0.850764	-0.2053	0.515303	0.756094	0.0535449	0.810844	0.999711
ENSMUSG00000015095	Fbxw5	0.0452152	0.694106	0.915279	-0.242458	0.13559	0.366421	0.0126048	0.912604	0.999711
ENSMUSG00000015112	Slc25a13	-0.430134	0.122049	0.531477	2.33643	2.17994e-09	1.12668e-07	-0.28314	0.257868	0.999711
ENSMUSG00000015120	Ube2i	-0.090749	0.783688	0.940367	-1.01261	0.0301635	0.139716	0.391147	0.216097	0.999711
ENSMUSG00000015126	Tsr3	0.0644076	0.688544	0.913918	0.0218828	0.919378	0.969079	-0.102184	0.509152	0.999711
ENSMUSG00000015127	Unkl	0.24863	0.556955	0.864672	-0.269908	0.63536	0.836057	0.147543	0.676752	0.999711
ENSMUSG00000015134	Aldh1a3	0.306371	0.418111	0.791587	0.0028555	0.997441	0.998774	-0.415612	0.215113	0.999711
ENSMUSG00000015143	Actn1	0.15256	0.550301	0.86203	0.89616	0.0132372	0.0779265	0.0853826	0.738122	0.999711
ENSMUSG00000015149	Sirt2	0.305545	0.121152	0.53038	0.164838	0.555317	0.782976	0.208791	0.290719	0.999711
ENSMUSG00000015165	Hnrnpl	0.364913	0.0510413	0.401308	0.231425	0.380482	0.650081	-0.0132017	0.943622	0.999711
ENSMUSG00000015176	Nolc1	-0.0261116	0.875212	0.964544	0.0633891	0.785862	0.912531	-0.149137	0.36269	0.999711
ENSMUSG00000015189	Casd1	0.324871	0.14029	0.567041	-0.020802	0.946683	0.979284	-0.0111995	0.959353	0.999711
ENSMUSG00000015202	Cnksr3	0.417464	0.217084	0.654827	0.0792053	0.873416	0.950273	0.0697666	0.835526	0.999711
ENSMUSG00000015214	Mtmr1	0.117001	0.442215	0.808511	-0.493323	0.0211223	0.108292	-0.00763891	0.958818	0.999711
ENSMUSG00000015217	Hmgb3	0.424778	0.0673469	0.436498	0.834684	0.00860027	0.0564438	0.40427	0.0693289	0.999711
ENSMUSG00000015222	Map2	-0.00128262	0.994282	0.998832	-0.569191	0.0247653	0.121349	0.00217332	0.990314	0.999711
ENSMUSG00000015224	Cyp2j9	-0.0684118	0.911622	0.976335	-0.783643	0.370342	0.641009	0.455749	0.461044	0.999711
ENSMUSG00000015243	Abca1	0.59519	0.11799	0.524661	0.13359	0.806573	0.922679	0.708937	0.0633781	0.999711
ENSMUSG00000015247	Nipsnap3b	0.0181941	0.914551	0.977434	1.18082	5.74207e-07	1.64403e-05	-0.219654	0.186771	0.999711
ENSMUSG00000015289	Lage3	-0.186405	0.343383	0.751562	0.44285	0.108368	0.319446	0.0679729	0.726443	0.999711
ENSMUSG00000015290	Ubl4a	0.0826909	0.57302	0.870866	-0.0901126	0.663007	0.851703	-0.20902	0.152761	0.999711
ENSMUSG00000015291	Gdi1	0.378165	0.0737026	0.451274	0.290555	0.33043	0.603662	0.125262	0.552775	0.999711
ENSMUSG00000015305	Sash1	0.0422773	0.921607	0.979184	0.951918	0.121956	0.343373	0.0526267	0.903251	0.999711
ENSMUSG00000015312	Gadd45b	0.247649	0.499046	0.841175	0.116584	0.814852	0.925896	-0.0933428	0.788826	0.999711
ENSMUSG00000015335	Zdhhc12	0.389041	0.110161	0.514695	-0.346479	0.314654	0.588088	0.0205119	0.934129	0.999711
ENSMUSG00000015337	Endog	-0.241156	0.403718	0.787172	-0.0445489	0.903304	0.962563	0.0532985	0.842415	0.999711
ENSMUSG00000015341	Golga7	0.247095	0.35533	0.758278	0.345576	0.361264	0.632537	-0.0956556	0.721051	0.999711
ENSMUSG00000015342	Xk	0.252638	0.246226	0.676546	0.488112	0.113346	0.328606	0.100312	0.641893	0.999711
ENSMUSG00000015354	Pcolce2	0.0514833	0.835701	0.954679	-1.0633	0.00361744	0.0289184	0.569933	0.0202927	0.999711
ENSMUSG00000015357	Clpx	0.054235	0.744687	0.929888	0.0312637	0.893391	0.957701	0.0598929	0.71575	0.999711
ENSMUSG00000015363	Trabd	-0.161361	0.448574	0.811461	0.444142	0.144349	0.3793	0.18564	0.39356	0.999711
ENSMUSG00000015377	Dennd6b	-0.406996	0.183309	0.616942	-0.559994	0.195546	0.451171	0.318167	0.298326	0.999711
ENSMUSG00000015396	Cd83	0.648957	0.00604973	0.173579	-0.957897	0.00433717	0.0332127	0.14197	0.548332	0.999711
ENSMUSG00000015461	Atf6b	-0.211837	0.310534	0.72977	-0.216501	0.466888	0.721439	0.0463361	0.830791	0.999711
ENSMUSG00000015468	Notch4	-0.431614	0.276645	0.701239	-0.40713	0.502107	0.748154	-0.14198	0.749951	0.999711
ENSMUSG00000015474	Ppt2	0.0392662	0.864126	0.961763	0.0491197	0.87948	0.952607	-0.0937753	0.683633	0.999711
ENSMUSG00000015476	Prrt1	0.197334	0.302759	0.723602	-0.0890187	0.741451	0.889286	-0.226528	0.236309	0.999711
ENSMUSG00000015478	Rnf5	0.237135	0.209369	0.647165	0.234636	0.371722	0.642138	0.0086849	0.963042	0.999711
ENSMUSG00000015484	Fam163a	-0.0978984	0.759435	0.934281	1.87114	4.88295e-05	0.000824064	-0.0831025	0.796143	0.999711
ENSMUSG00000015488	Cacfd1	0.198684	0.12714	0.542274	0.147742	0.420506	0.684833	0.159446	0.21695	0.999711
ENSMUSG00000015501	Hivep2	-0.330962	0.0407509	0.368457	-1.07147	3.03924e-06	7.37922e-05	-0.130026	0.420899	0.999711
ENSMUSG00000015522	Arnt	-0.16567	0.515446	0.848251	-0.461372	0.199363	0.455049	0.00540035	0.982446	0.999711
ENSMUSG00000015536	Mocs2	-0.0901926	0.611682	0.889158	0.230598	0.357673	0.630046	-0.060173	0.734108	0.999711
ENSMUSG00000015542	Nat9	-0.195942	0.260365	0.689692	-0.081333	0.734754	0.885712	-0.309336	0.0709134	0.999711
ENSMUSG00000015568	Lpl	-0.521484	0.0420237	0.37249	2.26702	7.28534e-10	4.28524e-08	-0.0343839	0.892984	0.999711
ENSMUSG00000015575	Atp6v0e	0.0516125	0.819784	0.950647	0.346022	0.282043	0.553953	0.229456	0.311783	0.999711
ENSMUSG00000015597	Zfp318	0.20414	0.342418	0.751135	0.658888	0.0302251	0.139817	0.24471	0.255013	0.999711
ENSMUSG00000015599	Ttbk1	-0.359858	0.102039	0.504338	-0.360986	0.256707	0.524533	-0.115281	0.615462	0.999711
ENSMUSG00000015605	Srf	-0.432364	0.0533537	0.405167	-0.462777	0.145871	0.38173	0.0121307	0.957286	0.999711
ENSMUSG00000015647	Lama5	0.102611	0.825598	0.951828	-1.69148	0.0163513	0.0912167	0.813308	0.110146	0.999711
ENSMUSG00000015653	Steap2	-0.204237	0.387619	0.777604	2.71426	3.68674e-15	5.6954e-13	-0.119344	0.614925	0.999711
ENSMUSG00000015656	Hspa8	0.132913	0.568126	0.868649	0.328349	0.318298	0.592275	-0.0111061	0.961912	0.999711
ENSMUSG00000015659	Serac1	-0.105367	0.712604	0.920038	-0.800579	0.0488996	0.195571	-0.197188	0.474409	0.999711
ENSMUSG00000015668	Pdzd11	-0.118983	0.457341	0.817041	0.369426	0.0998416	0.304543	-0.164976	0.297521	0.999711
ENSMUSG00000015671	Psma2	0.0246541	0.878432	0.965773	-0.0269273	0.905807	0.963872	0.168218	0.295825	0.999711
ENSMUSG00000015672	Mrpl32	0.542338	0.0111385	0.220854	0.390945	0.190557	0.445067	0.0708409	0.736288	0.999711
ENSMUSG00000015697	Setdb1	-0.0721824	0.688527	0.913918	-0.159126	0.530558	0.764513	0.170208	0.339142	0.999711
ENSMUSG00000015709	Arnt2	0.149054	0.304388	0.724632	0.768573	0.000185647	0.00256116	0.0502495	0.729662	0.999711
ENSMUSG00000015711	Prune1	0.320581	0.0138984	0.237435	0.434291	0.0163092	0.0910726	0.0148842	0.906108	0.999711
ENSMUSG00000015714	Cers2	-0.036606	0.88121	0.966907	-0.244932	0.482954	0.733366	0.149159	0.54196	0.999711
ENSMUSG00000015733	Capza2	0.255058	0.090533	0.489317	-0.257978	0.225543	0.487572	-0.0325059	0.828896	0.999711
ENSMUSG00000015745	Plekho1	-0.439448	0.0575816	0.412773	-0.0622573	0.845887	0.939086	-0.289461	0.204053	0.999711
ENSMUSG00000015747	Vps45	-0.186776	0.278039	0.702689	-0.0104169	0.965587	0.986355	-0.054738	0.74834	0.999711
ENSMUSG00000015748	Prpf3	-0.218519	0.310473	0.72977	-0.347433	0.246026	0.511405	0.0940029	0.650142	0.999711
ENSMUSG00000015749	Anp32e	0.212935	0.244287	0.675034	0.011541	0.964465	0.985927	0.0416833	0.819952	0.999711
ENSMUSG00000015750	Aph1a	0.239476	0.356201	0.758823	0.069508	0.865496	0.946344	0.544055	0.0520427	0.999711
ENSMUSG00000015755	Tab2	-0.292824	0.105463	0.508088	-0.413144	0.107087	0.317735	-0.00635046	0.971803	0.999711
ENSMUSG00000015757	Ppil4	0.290047	0.0629561	0.424962	-0.0108013	0.960742	0.984391	0.157822	0.305074	0.999711
ENSMUSG00000015759	Cnih1	0.0856151	0.677308	0.907769	0.519517	0.0742145	0.253558	-0.136612	0.507109	0.999711
ENSMUSG00000015766	Eps8	-0.186188	0.556343	0.864672	2.22747	1.09457e-06	2.92537e-05	0.0338002	0.915409	0.999711
ENSMUSG00000015776	Med22	0.0878466	0.56294	0.866724	-0.0359992	0.865731	0.946447	0.0252297	0.866347	0.999711
ENSMUSG00000015790	Surf1	0.226052	0.114201	0.52142	0.245792	0.22268	0.483391	0.104655	0.463916	0.999711
ENSMUSG00000015804	Med28	-0.191612	0.192437	0.628036	-0.0498306	0.808757	0.923658	-0.182171	0.21185	0.999711
ENSMUSG00000015806	Qdpr	-0.410739	0.0662998	0.433912	0.16603	0.59892	0.811608	-0.350969	0.116868	0.999711
ENSMUSG00000015829	Tnr	0.127481	0.706159	0.917993	-0.395563	0.411899	0.677747	0.37696	0.267457	0.999711
ENSMUSG00000015837	Sqstm1	0.635671	0.00309092	0.125592	0.578023	0.0561903	0.213306	0.0625266	0.769987	0.999711
ENSMUSG00000015839	Nfe2l2	-0.0464041	0.933343	0.981959	0.721462	0.359631	0.631409	-0.0349689	0.949827	0.999711
ENSMUSG00000015843	Rxrg	-0.756604	0.00395478	0.145905	2.70999	4.71166e-13	4.83479e-11	-0.698638	0.00780446	0.999711
ENSMUSG00000015846	Rxra	0.170532	0.440293	0.807344	1.29652	4.09383e-05	0.000709631	0.0339975	0.880022	0.999711
ENSMUSG00000015852	Fcrls	-1.05518	0.0121845	0.225085	0.782686	0.188868	0.442373	-0.855382	0.0418586	0.999711
ENSMUSG00000015869	Prpsap1	-0.175306	0.316832	0.735109	0.314472	0.20187	0.457699	-0.0643919	0.711161	0.999711
ENSMUSG00000015879	Fam184b	-0.172663	0.480048	0.832243	0.0525148	0.877094	0.951585	0.290375	0.206688	0.999711
ENSMUSG00000015882	Lcorl	0.616866	0.0203853	0.279587	-0.496047	0.188312	0.441658	0.233609	0.374003	0.999711
ENSMUSG00000015889	Lta4h	0.252161	0.111999	0.518476	0.720003	0.00125429	0.0125411	0.218478	0.166223	0.999711
ENSMUSG00000015890	Amdhd1	1.51709	0.000165188	0.0276455	-1.44822	0.0082435	0.0546637	0.347223	0.354725	0.999711
ENSMUSG00000015932	Dstn	0.224713	0.0879601	0.48725	-0.0261842	0.887956	0.955372	-0.0128958	0.921797	0.999711
ENSMUSG00000015937	H2afy	0.0436595	0.769848	0.937503	0.431517	0.0407746	0.172342	0.0615219	0.680049	0.999711
ENSMUSG00000015942	Gtf2ird2	-0.0451958	0.840187	0.955688	0.229539	0.465095	0.719985	0.113716	0.605514	0.999711
ENSMUSG00000015943	Bola1	-0.122425	0.648611	0.898166	-0.0576743	0.876624	0.951585	-0.199126	0.451138	0.999711
ENSMUSG00000015944	Gatsl2	0.00365979	0.981284	0.996167	0.36406	0.100431	0.305663	-0.159881	0.307834	0.999711
ENSMUSG00000015947	Fcgr1	-0.594491	0.0539468	0.405791	-0.326943	0.504328	0.74993	-0.0138982	0.96443	0.999711
ENSMUSG00000015961	Adss	0.139537	0.421534	0.793722	0.261498	0.283245	0.555265	-0.0733166	0.668504	0.999711
ENSMUSG00000015968	Cacna1d	-0.21318	0.372701	0.767681	-0.798105	0.0192507	0.101913	0.234375	0.327056	0.999711
ENSMUSG00000015971	Actr8	0.143008	0.364334	0.763309	0.158387	0.472583	0.725836	0.151628	0.328542	0.999711
ENSMUSG00000015980	Lrrc27	0.197445	0.310508	0.72977	0.957157	0.000289741	0.00369953	-0.162216	0.372868	0.999711
ENSMUSG00000015981	Stk32c	-0.397651	0.146922	0.573706	0.0860098	0.821578	0.929033	-0.404724	0.127507	0.999711
ENSMUSG00000015994	Fnta	-0.197251	0.320712	0.736935	0.614259	0.0287539	0.135011	-0.0635511	0.74923	0.999711
ENSMUSG00000016018	Skiv2l2	-0.0567159	0.705643	0.917805	0.173156	0.410773	0.676902	-0.127172	0.3899	0.999711
ENSMUSG00000016024	Lbp	0.169551	0.633816	0.893156	-1.84707	0.000916267	0.00959827	0.185957	0.605998	0.999711
ENSMUSG00000016087	Fli1	0.490004	0.237285	0.670773	1.3357	0.030004	0.139253	-0.15553	0.709673	0.999711
ENSMUSG00000016128	Stard13	-0.348574	0.185622	0.619829	0.0725901	0.849622	0.940546	0.135538	0.601768	0.999711
ENSMUSG00000016150	Tenm1	-0.141876	0.607926	0.889108	-0.305631	0.437404	0.698039	0.0516347	0.852294	0.999711
ENSMUSG00000016179	Camk1g	0.547546	0.0153569	0.247578	-0.0539856	0.864931	0.94614	0.0755879	0.735235	0.999711
ENSMUSG00000016181	Diexf	-0.069199	0.657529	0.90125	-0.0355759	0.868881	0.94754	-0.127254	0.383915	0.999711
ENSMUSG00000016194	Hsd11b1	0.488387	0.0822548	0.472747	-2.38659	3.42216e-09	1.69995e-07	0.343187	0.223165	0.999711
ENSMUSG00000016200	Syt14	-0.440908	0.265639	0.692702	-0.56694	0.313053	0.586943	0.0626844	0.861504	0.999711
ENSMUSG00000016206	H2-M3	0.0823694	0.777526	0.939519	-1.14035	0.00606289	0.0430465	0.192634	0.518508	0.999711
ENSMUSG00000016252	Atp5e	-0.319798	0.166042	0.594321	0.489332	0.13353	0.363087	-0.171477	0.457196	0.999711
ENSMUSG00000016253	Nelfcd	0.13562	0.424033	0.796081	-0.314068	0.188699	0.442373	0.132826	0.43043	0.999711
ENSMUSG00000016256	Ctsz	-0.313757	0.147547	0.574457	0.568339	0.0647017	0.232986	-0.233996	0.283224	0.999711
ENSMUSG00000016257	Prelid3b	0.00570454	0.979569	0.995502	0.321069	0.306596	0.580177	-0.286365	0.197747	0.999711
ENSMUSG00000016262	Sertad4	0.294058	0.193876	0.629304	1.11369	0.000411208	0.00493661	0.0902868	0.679919	0.999711
ENSMUSG00000016308	Ube2a	0.343844	0.0347394	0.347345	0.503922	0.0269721	0.128927	-0.284815	0.0759415	0.999711
ENSMUSG00000016319	Slc25a5	0.0954433	0.546121	0.860305	0.70512	0.00161996	0.015258	0.0134228	0.932292	0.999711
ENSMUSG00000016344	Ppdpf	-0.0627202	0.761785	0.934705	0.506741	0.0775551	0.261185	-0.263073	0.206973	0.999711
ENSMUSG00000016346	Kcnq2	-0.124807	0.526601	0.852543	-0.27048	0.332401	0.605768	-0.0225255	0.909101	0.999711
ENSMUSG00000016349	Eef1a2	0.0415591	0.8044	0.946218	0.214559	0.363932	0.63457	-0.115588	0.489833	0.999711
ENSMUSG00000016382	Pls3	0.248029	0.285018	0.708369	-0.364247	0.266678	0.536148	0.0847894	0.714586	0.999711
ENSMUSG00000016386	Mpped2	-0.0901012	0.655128	0.900239	0.368196	0.193772	0.449106	-0.144656	0.468969	0.999711
ENSMUSG00000016409	Nkap	0.0575724	0.722039	0.922593	0.317679	0.160867	0.404339	-0.0302484	0.84971	0.999711
ENSMUSG00000016427	Ndufa1	-0.233175	0.385986	0.777113	0.514815	0.175875	0.423852	0.102299	0.70365	0.999711
ENSMUSG00000016477	E2f3	0.299538	0.0601492	0.419017	0.342257	0.123045	0.345193	0.0754138	0.618081	0.999711
ENSMUSG00000016481	Cr1l	0.225238	0.248469	0.678399	-0.139502	0.619524	0.826862	0.221971	0.263923	0.999711
ENSMUSG00000016487	Ppfibp1	0.343899	0.139453	0.56578	-0.755595	0.0243133	0.120224	-0.113921	0.626134	0.999711
ENSMUSG00000016494	Cd34	0.44636	0.087565	0.487017	-2.13038	1.38428e-08	5.8439e-07	0.100409	0.70066	0.999711
ENSMUSG00000016495	Plgrkt	0.289528	0.0914404	0.49045	0.275248	0.252491	0.519031	0.0997832	0.55553	0.999711
ENSMUSG00000016496	Cd274	0.269138	0.386157	0.777113	2.41209	3.33103e-06	7.95037e-05	0.072188	0.79206	0.999711
ENSMUSG00000016503	Gtf3a	-0.93542	0.0215881	0.284769	-1.06988	0.0474527	0.191587	0.481145	0.162413	0.999711
ENSMUSG00000016510	Mtif3	0.127178	0.45452	0.81506	-0.126905	0.584545	0.802024	0.20978	0.202958	0.999711
ENSMUSG00000016520	Lnx2	0.0515582	0.900454	0.973703	-1.71616	0.00451855	0.0343176	0.0528501	0.893124	0.999711
ENSMUSG00000016526	Dyrk3	0.913251	0.00633233	0.175617	-0.88815	0.0568171	0.214938	0.299923	0.356143	0.999711
ENSMUSG00000016528	Mapkapk2	-0.00546502	0.982225	0.996167	-0.843941	0.0158421	0.0889055	0.245131	0.327926	0.999711
ENSMUSG00000016534	Lamp2	0.0887641	0.641269	0.896119	0.0654715	0.808746	0.923658	0.105436	0.579917	0.999711
ENSMUSG00000016541	Atxn10	0.291495	0.0770179	0.460627	0.259426	0.265196	0.534651	0.0757089	0.64564	0.999711
ENSMUSG00000016552	Foxred2	-0.135969	0.492609	0.837578	0.800073	0.00436171	0.0333555	0.076959	0.696946	0.999711
ENSMUSG00000016554	Eif3d	0.346356	0.0311004	0.331443	0.188819	0.404748	0.67273	0.128051	0.424734	0.999711
ENSMUSG00000016559	H3f3b	0.609889	0.00602935	0.173579	0.962895	0.00210911	0.0188853	0.0289602	0.895722	0.999711
ENSMUSG00000016619	Nup50	-0.0547247	0.725443	0.923903	0.0524415	0.809881	0.923658	-0.122847	0.420415	0.999711
ENSMUSG00000016624	Phf21b	-0.0776923	0.774001	0.938302	-1.05908	0.00711746	0.0489517	-0.00471474	0.985793	0.999711
ENSMUSG00000016637	Ift27	-0.0198531	0.943383	0.984498	0.49777	0.208174	0.466005	0.0953452	0.733461	0.999711
ENSMUSG00000016664	Pacsin2	-0.125558	0.446644	0.80956	1.20787	1.90315e-07	6.20755e-06	-0.199242	0.221558	0.999711
ENSMUSG00000016757	Ttll12	-0.0929935	0.662571	0.902057	0.14876	0.620838	0.827509	-0.26188	0.219916	0.999711
ENSMUSG00000016763	Scube1	0.352928	0.215658	0.652684	-2.50808	1.10287e-09	6.22658e-08	-0.0894975	0.753543	0.999711
ENSMUSG00000016831	Tox4	0.129574	0.32629	0.739598	-0.167902	0.362556	0.633597	0.0338955	0.792159	0.999711
ENSMUSG00000016833	Mrps18c	0.120583	0.603512	0.885988	-0.127774	0.696493	0.869035	0.103489	0.655113	0.999711
ENSMUSG00000016918	Sulf1	-0.304986	0.267071	0.694252	-0.134572	0.735281	0.885891	-0.0441339	0.872185	0.999711
ENSMUSG00000016921	Srsf6	0.371928	0.0961776	0.4969	0.390501	0.214966	0.473794	0.135775	0.540183	0.999711
ENSMUSG00000016933	Plcg1	-0.047683	0.77781	0.939528	0.223851	0.349294	0.623377	0.00757914	0.964152	0.999711
ENSMUSG00000016940	Kctd2	-0.129752	0.466316	0.822105	-0.247023	0.323626	0.597522	-0.0538884	0.760879	0.999711
ENSMUSG00000016946	Kctd5	0.20402	0.41041	0.789053	0.103541	0.768538	0.904716	0.0443342	0.85789	0.999711
ENSMUSG00000016984	Etaa1	-0.198701	0.361115	0.762887	-0.269043	0.36178	0.633288	0.0752627	0.707137	0.999711
ENSMUSG00000016995	Matn4	-0.694823	0.192374	0.628036	-2.26302	0.00555669	0.040266	0.178064	0.733613	0.999711
ENSMUSG00000017009	Sdc4	1.25317	0.0558852	0.409656	0.359028	0.694636	0.868789	0.309505	0.631998	0.999711
ENSMUSG00000017057	Il13ra1	0.204729	0.608877	0.889152	1.61878	0.00759481	0.051346	0.00188316	0.996273	0.999711
ENSMUSG00000017119	Nbr1	-0.0287769	0.827151	0.952119	0.121998	0.512005	0.753772	0.0240697	0.854679	0.999711
ENSMUSG00000017132	Cyth1	0.205197	0.141861	0.568496	0.432805	0.0283925	0.133806	0.146814	0.293234	0.999711
ENSMUSG00000017144	Rnd3	0.0608067	0.787139	0.940829	1.23557	9.37991e-05	0.00145902	0.0232337	0.915919	0.999711
ENSMUSG00000017146	Brca1	-0.150392	0.631262	0.892695	0.781578	0.093138	0.292392	-0.0226985	0.943828	0.999711
ENSMUSG00000017167	Cntnap1	-0.0510643	0.785519	0.940687	0.262435	0.324352	0.597903	0.00276331	0.988338	0.999711
ENSMUSG00000017176	Nt5c3b	-0.194688	0.225858	0.661618	0.14326	0.522454	0.760474	-0.3045	0.0549177	0.999711
ENSMUSG00000017188	Coa3	-0.150544	0.385529	0.776964	0.108824	0.656546	0.848319	-0.311459	0.0719832	0.999711
ENSMUSG00000017210	Med24	0.150795	0.518111	0.849263	-0.249626	0.449	0.706855	0.134736	0.563162	0.999711
ENSMUSG00000017221	Psmd3	0.294111	0.0890468	0.487522	0.366172	0.131048	0.359047	0.148456	0.390232	0.999711
ENSMUSG00000017264	Exosc10	-0.137045	0.509746	0.846032	-0.310873	0.28757	0.559692	0.194214	0.345245	0.999711
ENSMUSG00000017286	Glod4	-0.179038	0.182551	0.616012	0.0518156	0.785046	0.912454	-0.0184694	0.890707	0.999711
ENSMUSG00000017288	Vps53	0.211667	0.146535	0.573637	0.034929	0.86448	0.946074	0.0802211	0.578446	0.999711
ENSMUSG00000017291	Taok1	0.296718	0.151497	0.577108	0.051798	0.859383	0.943874	-0.159757	0.439325	0.999711
ENSMUSG00000017299	Dnttip1	0.148135	0.472884	0.826842	0.187523	0.510053	0.753044	-0.0433686	0.827255	0.999711
ENSMUSG00000017307	Acot8	-0.289954	0.229467	0.666657	-0.156417	0.643315	0.840182	0.0169977	0.943127	0.999711
ENSMUSG00000017314	Mpp2	0.372978	0.00234469	0.109145	-0.239744	0.164966	0.410137	-0.110364	0.363938	0.999711
ENSMUSG00000017344	Vtn	0.232701	0.699708	0.916216	0.0955458	0.91147	0.965976	0.154873	0.79774	0.999711
ENSMUSG00000017376	Nlk	-0.417388	0.00947324	0.208173	-0.907071	6.49935e-05	0.00106118	-0.381127	0.0170419	0.999711
ENSMUSG00000017386	Traf4	0.0852634	0.708004	0.918523	0.189787	0.566505	0.789298	-0.16353	0.47532	0.999711
ENSMUSG00000017390	Aldoc	-0.208429	0.660108	0.901901	-0.477206	0.476596	0.728814	0.169848	0.720044	0.999711
ENSMUSG00000017400	Stac2	-0.37676	0.0648813	0.429966	1.04726	0.000298667	0.00377709	-0.329695	0.110865	0.999711
ENSMUSG00000017404	Rpl19	-0.585045	0.0441555	0.380846	-0.41781	0.27069	0.54168	0.0116074	0.966539	0.999711
ENSMUSG00000017405	Nek8	-0.245285	0.490293	0.83688	-0.789553	0.13915	0.372474	-0.163698	0.663887	0.999711
ENSMUSG00000017412	Cacnb4	0.156128	0.313463	0.732622	0.00794503	0.971004	0.988156	-0.162164	0.292838	0.999711
ENSMUSG00000017417	Plxdc1	0.747025	0.0100812	0.213094	-0.80376	0.0500647	0.19824	0.228604	0.432667	0.999711
ENSMUSG00000017418	Arl5b	-0.0447215	0.79207	0.942679	-0.157673	0.507812	0.752045	-0.0842702	0.604432	0.999711
ENSMUSG00000017421	Zfp207	0.00768452	0.972229	0.992563	-0.263262	0.39851	0.665976	0.160827	0.464631	0.999711
ENSMUSG00000017428	Psmd11	0.149354	0.243067	0.673706	0.0407802	0.820752	0.928603	0.132178	0.297474	0.999711
ENSMUSG00000017446	C1qtnf1	0.0709464	0.85337	0.958966	1.54726	0.00607801	0.0431321	-0.0533399	0.889249	0.999711
ENSMUSG00000017453	Pipox	-0.674689	0.169638	0.599488	0.55608	0.437306	0.697961	-0.0819527	0.86553	0.999711
ENSMUSG00000017466	Timp2	0.497844	0.00454507	0.152174	-0.249122	0.314189	0.587583	0.164644	0.346979	0.999711
ENSMUSG00000017478	Zc3h18	-0.0989146	0.571364	0.869907	0.202166	0.410885	0.676971	-0.0147687	0.931365	0.999711
ENSMUSG00000017485	Top2b	-0.0525768	0.720768	0.922558	-0.393129	0.0579865	0.217496	0.107004	0.464822	0.999711
ENSMUSG00000017491	Rarb	-0.68486	0.00993443	0.212247	2.85192	4.04178e-14	5.07316e-12	-0.190316	0.462478	0.999711
ENSMUSG00000017493	Igfbp4	0.327488	0.063282	0.425272	-0.208762	0.401466	0.669216	0.107487	0.544683	0.999711
ENSMUSG00000017548	Suz12	0.202734	0.291245	0.712714	0.4942	0.0676201	0.239266	-0.049252	0.794413	0.999711
ENSMUSG00000017550	Atad5	0.0422227	0.901114	0.9738	-0.681644	0.153393	0.39396	0.629684	0.0548021	0.999711
ENSMUSG00000017561	Crlf3	0.0262846	0.896116	0.972206	0.754365	0.00754806	0.0511623	-0.168601	0.392605	0.999711
ENSMUSG00000017615	Tnfaip1	0.0718083	0.591621	0.879269	-0.0523189	0.782199	0.911258	-0.0679958	0.611219	0.999711
ENSMUSG00000017631	Abr	0.154089	0.356138	0.758804	-0.231862	0.326274	0.599335	0.00141224	0.993252	0.999711
ENSMUSG00000017639	Rab11fip4	0.0586133	0.740378	0.928733	-0.661846	0.0082829	0.0548991	-0.185359	0.295094	0.999711
ENSMUSG00000017664	Slc35c2	-0.109171	0.614499	0.890305	0.291358	0.342175	0.615789	-0.240104	0.272542	0.999711
ENSMUSG00000017667	Zfp334	-0.114751	0.583255	0.875356	-0.288617	0.328688	0.601896	-0.0971769	0.639285	0.999711
ENSMUSG00000017670	Elmo2	0.131381	0.368422	0.765666	-0.926876	7.33338e-06	0.000159834	-0.100035	0.49167	0.999711
ENSMUSG00000017677	Wsb1	-0.638365	0.0675883	0.43723	-0.789062	0.108065	0.319222	-0.0717586	0.834529	0.999711
ENSMUSG00000017679	Ttpal	0.126691	0.364803	0.763736	-0.563462	0.00421462	0.0325545	-0.0878706	0.525371	0.999711
ENSMUSG00000017686	Rhot1	0.174375	0.167527	0.596854	0.249547	0.157326	0.399365	-0.143188	0.245673	0.999711
ENSMUSG00000017692	Rhbdl3	0.377662	0.00261365	0.114208	0.0372691	0.834077	0.933354	0.379298	0.00304047	0.999711
ENSMUSG00000017697	Ada	1.01221	0.0906491	0.489465	-0.74953	0.380758	0.650388	1.84911	0.00250761	0.999711
ENSMUSG00000017707	Serinc3	0.352866	0.0805994	0.466859	-0.288805	0.311918	0.586264	0.254506	0.208133	0.999711
ENSMUSG00000017713	Tha1	-0.735588	0.0164733	0.255327	-1.02375	0.0149818	0.0854343	0.296779	0.322737	0.999711
ENSMUSG00000017715	Pgs1	0.109555	0.501875	0.84245	0.246218	0.286235	0.558408	-0.189829	0.250777	0.999711
ENSMUSG00000017716	Birc5	-0.452533	0.213289	0.651689	-1.18125	0.023341	0.116523	-0.130544	0.71951	0.999711
ENSMUSG00000017718	Afmid	0.11185	0.778008	0.939544	0.0898736	0.868076	0.947342	0.4318	0.245023	0.999711
ENSMUSG00000017721	Pigt	0.119861	0.662316	0.902057	-0.417471	0.286459	0.558557	0.335843	0.22902	0.999711
ENSMUSG00000017724	Etv4	-0.727625	0.0782871	0.463004	0.173605	0.770815	0.906255	0.0826694	0.845671	0.999711
ENSMUSG00000017734	Dbndd2	-0.139051	0.442155	0.808511	-0.591738	0.0215745	0.110049	0.326002	0.0737963	0.999711
ENSMUSG00000017737	Mmp9	0.637524	0.0864786	0.484234	0.557455	0.270418	0.541529	0.0503771	0.888929	0.999711
ENSMUSG00000017740	Slc12a5	0.0629882	0.75182	0.931936	-0.0603879	0.830417	0.932248	0.0110483	0.955837	0.999711
ENSMUSG00000017747	Ghdc	-0.295459	0.155969	0.583045	1.03809	0.000705421	0.00771309	-0.384738	0.0765513	0.999711
ENSMUSG00000017754	Pltp	1.06846	0.0511451	0.401899	0.63706	0.415084	0.681018	0.16754	0.759497	0.999711
ENSMUSG00000017756	Slc12a7	0.151731	0.68751	0.91385	0.344066	0.551405	0.780394	0.0650882	0.865029	0.999711
ENSMUSG00000017760	Ctsa	0.0709689	0.760421	0.934281	0.262214	0.425934	0.688805	0.206425	0.375979	0.999711
ENSMUSG00000017764	Zswim1	0.233703	0.293313	0.714379	-0.0558289	0.857706	0.943247	0.0786264	0.719158	0.999711
ENSMUSG00000017765	Slc12a4	-0.497637	0.132096	0.551365	0.0790364	0.870418	0.948406	-0.099188	0.770677	0.999711
ENSMUSG00000017774	Myo1c	0.313709	0.249045	0.679109	-0.289404	0.458304	0.714442	0.285857	0.29427	0.999711
ENSMUSG00000017776	Crk	0.132395	0.425429	0.796999	-0.0145694	0.950463	0.980093	-0.11704	0.479396	0.999711
ENSMUSG00000017778	Cox7c	-0.0769229	0.770732	0.937688	0.482442	0.191665	0.446455	0.127607	0.626511	0.999711
ENSMUSG00000017781	Pitpna	0.193649	0.207423	0.646126	0.448696	0.0385399	0.165838	-0.105726	0.489963	0.999711
ENSMUSG00000017801	Mlx	-0.026295	0.889897	0.970426	-0.208944	0.430614	0.693254	0.02827	0.879149	0.999711
ENSMUSG00000017802	Fam134c	0.038422	0.839769	0.955367	0.0246086	0.92718	0.971135	0.151252	0.424622	0.999711
ENSMUSG00000017830	Dhx58	-0.725418	0.141453	0.568273	0.386505	0.58062	0.79916	0.189123	0.691129	0.999711
ENSMUSG00000017831	Rab5a	0.493419	0.0176188	0.262656	0.396017	0.173609	0.42101	-0.0742818	0.716334	0.999711
ENSMUSG00000017837	Nkiras2	0.300817	0.077944	0.462235	0.450031	0.0606438	0.223842	-0.287348	0.0941707	0.999711
ENSMUSG00000017843	Ppp2r5c	0.304075	0.0535898	0.405791	-0.0535776	0.809804	0.923658	0.10068	0.52232	0.999711
ENSMUSG00000017858	Ift52	-0.197338	0.225181	0.66095	-0.0554936	0.807744	0.923403	-0.163652	0.305607	0.999711
ENSMUSG00000017868	Sgk2	-0.19595	0.655185	0.900239	0.210912	0.742089	0.88952	-0.192656	0.657878	0.999711
ENSMUSG00000017897	Eya2	0.576897	0.00889092	0.202247	0.427977	0.192289	0.447423	0.0624985	0.784906	0.999711
ENSMUSG00000017929	B4galt5	-0.0118262	0.952216	0.986876	-0.0302537	0.913843	0.966994	-0.050011	0.800687	0.999711
ENSMUSG00000017943	Gdap1l1	0.376982	0.0418058	0.371966	0.216734	0.405893	0.673243	0.0322034	0.861451	0.999711
ENSMUSG00000017969	Ptgis	-0.200613	0.537695	0.857116	-0.907183	0.0595981	0.22118	0.206062	0.549058	0.999711
ENSMUSG00000017978	Cadps2	0.363915	0.0379663	0.357954	-0.0535858	0.828605	0.931754	-0.0808663	0.643913	0.999711
ENSMUSG00000017999	Ddx27	0.357826	0.0191207	0.271971	0.152841	0.470383	0.723721	0.329948	0.0281592	0.999711
ENSMUSG00000018001	Cyth3	0.220626	0.138834	0.565137	0.668808	0.00136829	0.0134619	-0.0993785	0.496157	0.999711
ENSMUSG00000018008	Cyth4	-0.3138	0.416494	0.790372	-0.333084	0.552659	0.781654	-0.389394	0.320215	0.999711
ENSMUSG00000018012	Rac3	0.0281136	0.905964	0.975015	0.0239534	0.940198	0.97641	0.0461615	0.840811	0.999711
ENSMUSG00000018040	Rrp7a	0.119558	0.446064	0.809438	0.0315264	0.884273	0.954458	0.0978148	0.524377	0.999711
ENSMUSG00000018042	Cyb5r3	0.193974	0.338756	0.748307	-0.112416	0.696122	0.869035	0.333366	0.105338	0.999711
ENSMUSG00000018068	Ints2	-0.17192	0.534593	0.855679	-0.678613	0.0836047	0.274222	0.188828	0.4884	0.999711
ENSMUSG00000018076	Med13l	-0.0972135	0.504867	0.843361	-0.225972	0.276103	0.547687	0.00469262	0.974404	0.999711
ENSMUSG00000018102	Hist1h2bc	-0.216959	0.461949	0.820351	0.714149	0.0884478	0.28342	-0.546639	0.0659857	0.999711
ENSMUSG00000018143	Mafk	0.52902	0.163196	0.591885	-0.233607	0.664803	0.852508	0.0630688	0.87426	0.999711
ENSMUSG00000018160	Med1	0.21894	0.281766	0.705899	0.0677106	0.813632	0.925715	-0.25968	0.200151	0.999711
ENSMUSG00000018166	Erbb3	-0.175188	0.640696	0.895858	0.0578977	0.915501	0.967242	-0.271203	0.468903	0.999711
ENSMUSG00000018167	Stard3	0.0766953	0.721573	0.922558	0.39193	0.198603	0.4542	-0.298005	0.169362	0.999711
ENSMUSG00000018169	Mfng	-0.416466	0.298503	0.719339	0.079708	0.889986	0.956165	0.249095	0.557736	0.999711
ENSMUSG00000018171	Vmp1	0.265942	0.257097	0.686732	-0.346999	0.295625	0.568599	0.0520211	0.824516	0.999711
ENSMUSG00000018189	Uchl5	0.403773	0.0211153	0.28248	0.465312	0.058342	0.218363	-0.0661801	0.703159	0.999711
ENSMUSG00000018196	Glrx2	-0.019251	0.925456	0.979692	-0.0693805	0.810666	0.923659	-0.0570587	0.780007	0.999711
ENSMUSG00000018199	Trove2	0.0313348	0.869612	0.963357	0.912766	0.000738434	0.00799762	-0.187232	0.324281	0.999711
ENSMUSG00000018209	Stk4	0.0333451	0.83401	0.954115	-0.272127	0.227277	0.489815	-0.0924733	0.558965	0.999711
ENSMUSG00000018217	Pmp22	-0.0297304	0.891539	0.970788	0.566006	0.0738769	0.252777	-0.215264	0.322256	0.999711
ENSMUSG00000018238	Gdf9	-0.499011	0.157191	0.583936	-0.360894	0.464168	0.71942	-0.319717	0.336894	0.999711
ENSMUSG00000018239	Zcchc10	0.151629	0.498327	0.84059	0.293406	0.340846	0.614625	-0.0789928	0.711454	0.999711
ENSMUSG00000018286	Psmb6	0.230404	0.144051	0.571893	0.307474	0.167564	0.413146	0.085677	0.586808	0.999711
ENSMUSG00000018287	Spag7	0.228934	0.165666	0.594268	0.238994	0.301681	0.575138	0.134912	0.407491	0.999711
ENSMUSG00000018293	Pfn1	0.0220251	0.92032	0.979184	0.345318	0.265943	0.535467	-0.132708	0.545021	0.999711
ENSMUSG00000018322	Tomm34	-0.130483	0.436209	0.804463	-0.461107	0.0512005	0.201336	-0.253156	0.129307	0.999711
ENSMUSG00000018326	Ywhab	0.32858	0.0593562	0.417214	0.468601	0.0570153	0.215231	-0.00476419	0.978154	0.999711
ENSMUSG00000018334	Ksr1	0.314111	0.0792752	0.46513	-0.0405398	0.87275	0.949832	0.316385	0.0778506	0.999711
ENSMUSG00000018339	Gpx3	-0.172989	0.471311	0.826107	1.14571	0.000610276	0.00683606	0.060155	0.80835	0.999711
ENSMUSG00000018340	Anxa6	0.0600444	0.756658	0.933817	-0.364181	0.183599	0.434884	-0.145334	0.453147	0.999711
ENSMUSG00000018341	Il12rb2	-0.27355	0.532828	0.8549	-0.329863	0.60087	0.813231	-0.245563	0.579945	0.999711
ENSMUSG00000018347	Zkscan6	-0.0544753	0.747654	0.931119	-0.318566	0.168097	0.413815	0.066456	0.665549	0.999711
ENSMUSG00000018362	Kpna2	0.315445	0.388152	0.777604	-1.37435	0.00675015	0.0469538	0.321063	0.339586	0.999711
ENSMUSG00000018363	Smurf2	-0.0964303	0.57862	0.872972	0.0644689	0.794241	0.916948	0.0759718	0.658589	0.999711
ENSMUSG00000018372	Cep95	-0.672421	0.0179242	0.266057	-0.968484	0.0161974	0.09061	0.163812	0.546651	0.999711
ENSMUSG00000018387	Shroom1	0.128644	0.6199	0.890621	-0.251465	0.490907	0.739597	-0.0886809	0.728881	0.999711
ENSMUSG00000018395	Kif3a	0.122148	0.456855	0.81651	0.0140648	0.951583	0.980242	-0.0847658	0.604336	0.999711
ENSMUSG00000018398	2018-09-08	0.167793	0.307508	0.727224	-0.632822	0.00652404	0.0456293	-0.334308	0.0419795	0.999711
ENSMUSG00000018401	Mtmr4	0.292077	0.0539501	0.405791	-0.246343	0.247611	0.513333	0.110545	0.459657	0.999711
ENSMUSG00000018405	Mrm1	-0.1958	0.315525	0.733885	-0.547071	0.0416214	0.174556	-0.145081	0.440561	0.999711
ENSMUSG00000018411	Mapt	-0.161487	0.298713	0.719544	-0.247285	0.260267	0.52858	-0.0239108	0.877618	0.999711
ENSMUSG00000018412	Kansl1	-0.0628755	0.633367	0.893156	-0.200976	0.280351	0.55193	-0.0251998	0.846483	0.999711
ENSMUSG00000018415	Gid4	0.165252	0.546816	0.860876	0.00364769	0.992561	0.996502	-0.207785	0.449364	0.999711
ENSMUSG00000018417	Myo1b	0.207294	0.315758	0.734193	1.11446	0.000133765	0.00195882	-0.169557	0.408165	0.999711
ENSMUSG00000018425	Dhx40	0.128694	0.414295	0.789609	0.610211	0.00602987	0.0428337	-0.105684	0.49902	0.999711
ENSMUSG00000018427	Ypel2	0.18118	0.264521	0.692669	0.127245	0.576625	0.796859	-0.281442	0.0779071	0.999711
ENSMUSG00000018428	Akap1	-0.0626405	0.741001	0.928956	-0.122823	0.648625	0.844059	-0.244132	0.198343	0.999711
ENSMUSG00000018433	Nol11	0.10478	0.600793	0.884912	0.0451879	0.872296	0.949672	0.1913	0.332699	0.999711
ENSMUSG00000018442	Derl2	0.00351486	0.987114	0.997115	-0.218643	0.478066	0.729392	-0.00381489	0.985944	0.999711
ENSMUSG00000018446	C1qbp	0.336938	0.142187	0.569239	0.711119	0.0279014	0.132289	0.123416	0.589326	0.999711
ENSMUSG00000018449	Rpain	0.00709663	0.959357	0.988902	0.228394	0.235747	0.499167	0.0144	0.914253	0.999711
ENSMUSG00000018451	6330403K07Rik	0.127078	0.495007	0.838916	-0.0815455	0.756167	0.897821	-0.124304	0.502887	0.999711
ENSMUSG00000018459	Slc13a3	-0.206192	0.55604	0.864604	0.00810051	0.986259	0.994108	-0.552269	0.117136	0.999711
ENSMUSG00000018470	Kcnab3	-0.072583	0.64217	0.896315	1.42859	7.14231e-11	5.20242e-09	-0.187337	0.22305	0.999711
ENSMUSG00000018474	Chd3	0.0625446	0.750158	0.931272	-0.200779	0.47099	0.724338	0.0625097	0.751508	0.999711
ENSMUSG00000018476	Kdm6b	0.791826	0.0456292	0.383819	0.0901262	0.871917	0.949451	0.285544	0.468542	0.999711
ENSMUSG00000018481	Appbp2	-0.0348417	0.802653	0.946218	0.129953	0.509435	0.752747	0.0451119	0.74549	0.999711
ENSMUSG00000018501	Ncor1	-0.000717302	0.99599	0.999265	-0.175618	0.384625	0.65367	0.0287025	0.840724	0.999711
ENSMUSG00000018507	Trpv2	0.167577	0.509186	0.845855	-0.531774	0.139621	0.373226	-0.112327	0.658977	0.999711
ENSMUSG00000018509	Cenpv	-0.351382	0.0711303	0.444818	0.412649	0.126008	0.35029	-0.2478	0.189522	0.999711
ENSMUSG00000018537	Pcgf2	-0.0989897	0.666584	0.902952	-0.160819	0.606929	0.817809	0.303802	0.143304	0.999711
ENSMUSG00000018541	Cwc25	0.148359	0.284918	0.708289	-0.0398596	0.835816	0.934163	0.0976842	0.46445	0.999711
ENSMUSG00000018547	Pip4k2b	-0.0053129	0.980439	0.995932	-0.0722319	0.813795	0.925715	-0.0773117	0.721751	0.999711
ENSMUSG00000018548	Trim37	-0.0137739	0.92935	0.980788	-0.177607	0.418875	0.683707	-0.232468	0.134487	0.999711
ENSMUSG00000018559	Ctdnep1	0.000609773	0.99649	0.999265	0.304967	0.120156	0.340555	-0.111854	0.424069	0.999711
ENSMUSG00000018565	Elp5	0.0503861	0.784459	0.940687	0.0308886	0.905446	0.963871	-0.00117711	0.994891	0.999711
ENSMUSG00000018567	Gabarap	-0.137476	0.505095	0.84348	0.253116	0.385165	0.653943	-0.0473859	0.818109	0.999711
ENSMUSG00000018572	Phf23	-0.128028	0.615892	0.890621	0.146717	0.682825	0.862327	-0.0910299	0.719689	0.999711
ENSMUSG00000018574	Acadvl	-0.0953318	0.789054	0.941251	-0.829361	0.103165	0.310822	0.150754	0.673817	0.999711
ENSMUSG00000018583	G3bp1	0.0260801	0.876044	0.964932	0.337238	0.153439	0.39396	-0.112395	0.500691	0.999711
ENSMUSG00000018585	Atox1	-0.0953402	0.658915	0.901598	0.0642329	0.833269	0.933096	0.00527022	0.98053	0.999711
ENSMUSG00000018589	Glra2	0.117118	0.633041	0.893156	0.827271	0.0170474	0.0939079	0.145868	0.550383	0.999711
ENSMUSG00000018593	Sparc	0.0537445	0.906091	0.975015	-0.00679949	0.991578	0.995984	0.566825	0.21498	0.999711
ENSMUSG00000018599	Mief2	0.164187	0.255476	0.686051	0.253965	0.207057	0.464613	-0.079664	0.57517	0.999711
ENSMUSG00000018634	Crhr1	0.0461097	0.878889	0.965796	-1.5904	0.000246831	0.00324598	-0.35725	0.242267	0.999711
ENSMUSG00000018648	Dusp14	0.145597	0.5094	0.845855	-0.555654	0.0737722	0.25265	-0.349594	0.110211	0.999711
ENSMUSG00000018651	Tada2a	0.188484	0.324332	0.738991	-0.165179	0.538725	0.770829	0.0814808	0.665273	0.999711
ENSMUSG00000018654	Ikzf1	-0.349705	0.363886	0.763309	1.63712	0.00526296	0.0384947	-0.278559	0.47847	0.999711
ENSMUSG00000018659	Pnpo	0.149862	0.487167	0.835149	0.565323	0.0624842	0.227566	0.0825113	0.699481	0.999711
ENSMUSG00000018661	Cog1	0.031298	0.870333	0.963473	-0.286872	0.285092	0.557261	-0.156216	0.410452	0.999711
ENSMUSG00000018666	Cbx1	-0.102824	0.544446	0.860305	0.48628	0.0412035	0.173676	-0.307088	0.0663401	0.999711
ENSMUSG00000018669	Cdk5rap3	0.0850468	0.694821	0.915397	-0.235978	0.441428	0.701429	0.201706	0.354067	0.999711
ENSMUSG00000018672	Copz2	-0.498128	0.2717	0.696521	-0.622728	0.374106	0.643922	0.220257	0.639184	0.999711
ENSMUSG00000018677	Slc25a39	-0.311029	0.145663	0.573596	0.330268	0.273191	0.544215	-0.447655	0.0368237	0.999711
ENSMUSG00000018678	Sp2	-0.160138	0.428126	0.799388	0.445904	0.108411	0.319446	-0.0934132	0.619912	0.999711
ENSMUSG00000018697	Aatf	0.0447625	0.805107	0.946314	-0.221823	0.377104	0.646503	0.144477	0.409	0.999711
ENSMUSG00000018707	Dync1h1	0.0382385	0.929144	0.980788	-0.928625	0.127621	0.352846	0.41858	0.331307	0.999711
ENSMUSG00000018733	Pex12	0.106848	0.494365	0.838906	0.303215	0.164406	0.409283	0.0899907	0.55765	0.999711
ENSMUSG00000018736	Ndel1	0.0628531	0.689241	0.913918	-0.042731	0.846338	0.939086	-0.142017	0.360925	0.999711
ENSMUSG00000018740	Slc25a35	-0.655936	0.00616686	0.174434	-0.552306	0.0979895	0.301233	-0.446883	0.0433889	0.999711
ENSMUSG00000018750	Zbtb4	-0.338581	0.0175453	0.262411	0.238344	0.237531	0.501149	-0.0873477	0.541566	0.999711
ENSMUSG00000018761	Mpdu1	0.428076	0.00863014	0.201439	0.402823	0.079436	0.265631	0.209778	0.19929	0.999711
ENSMUSG00000018765	Fxr2	-0.0589372	0.743422	0.929393	0.236708	0.349505	0.623437	0.0520908	0.771597	0.999711
ENSMUSG00000018770	Atp5g3	0.0539045	0.819046	0.950616	0.757797	0.0230729	0.115604	-0.000859152	0.997089	0.999711
ENSMUSG00000018774	Cd68	0.590239	0.00207061	0.101476	0.317574	0.2391	0.502657	0.44706	0.0196316	0.999711
ENSMUSG00000018796	Acsl1	0.338721	0.0102667	0.21501	-0.0120789	0.948199	0.979627	0.0354029	0.785792	0.999711
ENSMUSG00000018800	Abca5	0.182563	0.383246	0.775687	0.140944	0.635985	0.836437	0.235087	0.262479	0.999711
ENSMUSG00000018809	Smyd4	0.131257	0.406806	0.788382	-0.154934	0.483089	0.733366	0.279078	0.0723847	0.999711
ENSMUSG00000018819	Lsp1	0.479834	0.0522804	0.404196	1.32891	0.000157473	0.00224292	0.577679	0.0176899	0.999711
ENSMUSG00000018820	Zfyve27	0.298749	0.102614	0.504965	-0.187776	0.468529	0.722386	0.060801	0.739292	0.999711
ENSMUSG00000018821	Avpi1	0.279751	0.163877	0.591885	0.132895	0.631683	0.834561	-0.0783245	0.688726	0.999711
ENSMUSG00000018841	Rad51d	-0.308769	0.0286927	0.320892	0.552249	0.00452647	0.0343406	-0.187404	0.160096	0.999711
ENSMUSG00000018846	Pank3	0.0529382	0.818062	0.950596	0.177384	0.5861	0.803451	-0.154738	0.499766	0.999711
ENSMUSG00000018848	Rars	0.340997	0.0276566	0.315698	-0.0783093	0.718504	0.878842	0.184772	0.226658	0.999711
ENSMUSG00000018849	Wwc1	-0.240894	0.300802	0.721457	-1.07512	0.00118539	0.0119371	-0.190707	0.416948	0.999711
ENSMUSG00000018858	Mrpl58	-0.0200985	0.878372	0.965773	-0.0456939	0.802642	0.921283	-0.324527	0.0119451	0.999711
ENSMUSG00000018861	Fdxr	-0.606744	0.0279332	0.316681	-0.234311	0.555224	0.782961	-0.131964	0.638172	0.999711
ENSMUSG00000018865	Sult4a1	0.200351	0.221002	0.65809	-0.0855218	0.711506	0.875717	-0.284798	0.0820744	0.999711
ENSMUSG00000018882	Mrpl45	-0.0108435	0.939466	0.983549	0.478775	0.0170266	0.0939034	-0.113856	0.420974	0.999711
ENSMUSG00000018899	Irf1	0.645698	0.0183991	0.269712	-1.07612	0.00792121	0.0530016	0.187529	0.48624	0.999711
ENSMUSG00000018900	Slc22a5	0.408786	0.117891	0.524661	0.179307	0.640468	0.838663	0.175929	0.486897	0.999711
ENSMUSG00000018906	P4ha2	0.00437588	0.9853	0.996457	-0.376276	0.267117	0.536578	0.24234	0.311607	0.999711
ENSMUSG00000018909	Arrb1	-0.0553548	0.788185	0.940829	0.326314	0.264067	0.533216	-0.0801815	0.698976	0.999711
ENSMUSG00000018921	Pelp1	0.054951	0.801826	0.946218	0.184577	0.553251	0.781864	0.182223	0.412582	0.999711
ENSMUSG00000018923	Med11	-0.130805	0.450283	0.812903	-0.309961	0.184168	0.435709	-0.272166	0.0914725	0.999711
ENSMUSG00000018931	Natd1	0.187313	0.378904	0.77246	0.327511	0.283887	0.555911	-0.0371236	0.862123	0.999711
ENSMUSG00000018932	Map2k3	0.063471	0.766639	0.936608	-1.0146	0.000763305	0.00822861	0.274712	0.18237	0.999711
ENSMUSG00000018965	Ywhah	0.593645	0.00569343	0.170242	-0.421728	0.163056	0.407146	-0.0472996	0.824609	0.999711
ENSMUSG00000018974	Sart3	-0.416902	0.0436356	0.378454	0.034392	0.905523	0.963871	-0.249118	0.222519	0.999711
ENSMUSG00000018983	E2f2	-0.400407	0.278906	0.70362	-2.11154	0.000272107	0.00351589	-0.609285	0.101797	0.999711
ENSMUSG00000018995	Nars2	-0.00487156	0.978851	0.995062	0.137453	0.589203	0.805755	0.0216556	0.901629	0.999711
ENSMUSG00000018999	Slc35b4	0.0436832	0.80755	0.947133	0.276285	0.276098	0.547687	-0.00877564	0.960947	0.999711
ENSMUSG00000019027	Dnah1	-0.650993	0.000771974	0.0649845	-0.954731	0.000540626	0.00619407	0.0247208	0.900136	0.999711
ENSMUSG00000019039	Dalrd3	-0.151333	0.383238	0.775687	-0.0462939	0.849204	0.940379	-0.186562	0.280257	0.999711
ENSMUSG00000019054	Fis1	0.0568257	0.73745	0.927739	0.332033	0.165568	0.410628	0.0376423	0.824241	0.999711
ENSMUSG00000019055	Plod1	-0.341965	0.272949	0.696587	0.216477	0.628859	0.832585	0.102752	0.743675	0.999711
ENSMUSG00000019066	Rab3d	0.353392	0.0349133	0.348379	-0.970846	6.60138e-05	0.00107659	0.0351451	0.832783	0.999711
ENSMUSG00000019080	Mfsd3	0.171688	0.450524	0.813041	-0.308266	0.33908	0.612146	0.169587	0.466085	0.999711
ENSMUSG00000019082	Slc25a22	0.408451	0.00765388	0.190154	-0.542542	0.011942	0.0720827	-0.215489	0.157137	0.999711
ENSMUSG00000019087	Atp6ap1	0.404602	0.0716524	0.446296	0.0682895	0.82952	0.932094	0.155684	0.487733	0.999711
ENSMUSG00000019088	Dnase1l1	0.109584	0.751621	0.931936	-0.162652	0.756691	0.898063	-0.232532	0.511086	0.999711
ENSMUSG00000019102	Aldh3a1	-0.175717	0.587795	0.877016	-0.215701	0.634628	0.835982	-0.256106	0.413537	0.999711
ENSMUSG00000019122	Ccl9	-1.28804	0.00143318	0.0829638	0.385315	0.519291	0.759013	-0.508293	0.205777	0.999711
ENSMUSG00000019124	Scrn1	-0.091327	0.544774	0.860305	0.513639	0.0159769	0.0895545	-0.180786	0.230448	0.999711
ENSMUSG00000019132	BC005537	0.0115192	0.956347	0.988044	0.00507097	0.986409	0.994118	-0.0605369	0.773546	0.999711
ENSMUSG00000019139	Isyna1	0.120187	0.710624	0.919385	1.00291	0.0286333	0.13467	-0.293778	0.366485	0.999711
ENSMUSG00000019143	Hars2	-0.168835	0.379671	0.772738	-0.222295	0.409386	0.675959	0.10369	0.582065	0.999711
ENSMUSG00000019146	Cacng2	-0.104696	0.536787	0.857031	1.24111	2.59629e-07	8.12887e-06	-0.102332	0.547431	0.999711
ENSMUSG00000019158	Tmem160	-0.0625384	0.737647	0.927867	0.0531258	0.837521	0.93519	0.0221959	0.90733	0.999711
ENSMUSG00000019173	Rab5c	0.106102	0.631924	0.893156	0.482957	0.123281	0.34555	-0.152463	0.49075	0.999711
ENSMUSG00000019179	Mdh2	0.15437	0.400052	0.784671	0.249965	0.335066	0.60818	-0.00266157	0.988418	0.999711
ENSMUSG00000019188	H13	-0.0354468	0.871833	0.963606	0.0519406	0.867728	0.94731	-0.0102048	0.963316	0.999711
ENSMUSG00000019189	Rnf145	0.493139	0.00440179	0.149714	-0.0596454	0.807288	0.923271	0.0021387	0.99014	0.999711
ENSMUSG00000019194	Scn1b	-0.167573	0.358794	0.761002	-0.0418468	0.871187	0.949023	-0.00285959	0.987603	0.999711
ENSMUSG00000019210	Atp6v1e1	0.364714	0.0466249	0.386499	0.407158	0.115736	0.333131	0.0314222	0.863622	0.999711
ENSMUSG00000019230	Lhx9	0.287778	0.484503	0.833983	-1.02776	0.0705627	0.24633	0.160698	0.665323	0.999711
ENSMUSG00000019232	Etnppl	0.0970323	0.858842	0.960134	-1.4633	0.0607181	0.223977	0.854349	0.120537	0.999711
ENSMUSG00000019235	Rps6kl1	-0.0504533	0.792471	0.942837	-0.0563245	0.833693	0.933274	-0.0574581	0.761065	0.999711
ENSMUSG00000019254	Ppp1r12c	-0.0792356	0.675054	0.90704	0.363707	0.17334	0.420793	0.0538262	0.777318	0.999711
ENSMUSG00000019256	Ahr	0.0796434	0.753512	0.932882	0.575584	0.100581	0.305836	-0.131898	0.577356	0.999711
ENSMUSG00000019261	Map1s	0.00877983	0.965881	0.990687	0.241729	0.401662	0.669262	-0.00794953	0.969142	0.999711
ENSMUSG00000019295	Tmem129	0.30744	0.0710846	0.444818	-0.065284	0.786342	0.912531	-0.0929045	0.583443	0.999711
ENSMUSG00000019297	Nop9	0.0176515	0.912543	0.976716	0.315338	0.15534	0.397122	0.040397	0.795296	0.999711
ENSMUSG00000019302	Atp6v0a1	0.401635	0.115085	0.522397	-0.131281	0.715356	0.877896	0.0883297	0.728815	0.999711
ENSMUSG00000019303	Psmc3ip	-0.282279	0.274438	0.698495	0.486126	0.149667	0.388163	0.0653321	0.775879	0.999711
ENSMUSG00000019312	Grb7	0.369977	0.377082	0.770945	1.81447	0.00106483	0.0109186	-0.332647	0.382099	0.999711
ENSMUSG00000019338	Zfp687	0.222203	0.412385	0.789507	0.242697	0.528303	0.763351	0.638804	0.0195017	0.999711
ENSMUSG00000019359	Gdpd2	-1.1355	0.0105957	0.217452	-1.33159	0.0472443	0.191015	0.152163	0.725716	0.999711
ENSMUSG00000019362	D8Ertd738e	-0.11493	0.558513	0.864672	0.120818	0.662664	0.851529	-0.241604	0.218338	0.999711
ENSMUSG00000019370	Calm3	0.250572	0.172243	0.602794	-0.0747163	0.773277	0.907331	-0.20227	0.270408	0.999711
ENSMUSG00000019373	Cops3	-0.00478734	0.97756	0.99461	-0.160526	0.502085	0.748154	0.206073	0.220588	0.999711
ENSMUSG00000019428	Fkbp8	0.132695	0.465054	0.82153	0.318396	0.214074	0.473318	-0.0589371	0.745445	0.999711
ENSMUSG00000019432	Ddx39b	0.275737	0.139128	0.565279	-0.0734318	0.780196	0.910249	0.203777	0.273009	0.999711
ENSMUSG00000019433	Gipc1	0.274323	0.27465	0.698542	-0.236569	0.504052	0.749776	-0.0559405	0.824134	0.999711
ENSMUSG00000019437	Tlcd1	-0.452493	0.223295	0.660096	-0.108417	0.842217	0.937441	0.0322964	0.930836	0.999711
ENSMUSG00000019461	Plscr3	0.197113	0.267618	0.694252	0.040755	0.869819	0.948224	-0.0930307	0.587392	0.999711
ENSMUSG00000019464	Ptger1	-0.121114	0.70295	0.916799	0.450681	0.363209	0.633734	-0.30546	0.391314	0.999711
ENSMUSG00000019467	Arhgef25	-0.308279	0.073767	0.451274	-0.638414	0.00874535	0.0570858	-0.0941769	0.584563	0.999711
ENSMUSG00000019470	Xab2	0.190814	0.446377	0.809524	-0.249776	0.479504	0.730955	0.367952	0.14057	0.999711
ENSMUSG00000019471	Cdc37	0.0522084	0.771923	0.937851	0.104818	0.678256	0.859534	-0.204217	0.256953	0.999711
ENSMUSG00000019478	Rab4a	0.433142	0.00765104	0.190154	0.694622	0.00227313	0.0201105	0.168667	0.294142	0.999711
ENSMUSG00000019487	Trip10	-0.230583	0.589681	0.87815	-1.11788	0.0718931	0.248628	0.0700639	0.876599	0.999711
ENSMUSG00000019494	Cops6	0.128541	0.355818	0.758748	0.289652	0.139897	0.373564	-0.194151	0.162313	0.999711
ENSMUSG00000019505	Ubb	0.438057	0.0159475	0.251616	0.3675	0.151985	0.391966	0.091809	0.612678	0.999711
ENSMUSG00000019518	Ap4m1	-0.395496	0.18164	0.615261	-0.348284	0.402734	0.670175	0.242572	0.396112	0.999711
ENSMUSG00000019528	Gyg	-0.00648732	0.968744	0.99182	0.211986	0.365129	0.635585	-0.191422	0.247641	0.999711
ENSMUSG00000019558	Slc6a8	0.0524253	0.702955	0.916799	0.650947	0.000832959	0.00885759	0.0474511	0.73065	0.999711
ENSMUSG00000019564	Arid3a	-0.496729	0.0904915	0.489317	-1.4696	0.000588504	0.00665048	0.205298	0.45592	0.999711
ENSMUSG00000019578	Ubxn6	0.206799	0.267424	0.694252	0.480529	0.0673141	0.238423	-0.215413	0.248479	0.999711
ENSMUSG00000019579	Mydgf	0.00838382	0.962235	0.989552	-0.037706	0.880148	0.952798	-0.0580113	0.74403	0.999711
ENSMUSG00000019590	Cyb561	0.559098	0.0171147	0.25924	-0.397589	0.229499	0.491965	0.088166	0.707031	0.999711
ENSMUSG00000019647	Sema6a	-0.0152674	0.91458	0.977434	0.583468	0.00455524	0.034503	0.251513	0.0756004	0.999711
ENSMUSG00000019659	Ccdc12	-0.185813	0.38048	0.773057	0.259261	0.373926	0.643747	-0.232105	0.254574	0.999711
ENSMUSG00000019689	Fmc1	-0.435795	0.0735089	0.450949	0.580467	0.0890869	0.284633	-0.510392	0.0358717	0.999711
ENSMUSG00000019699	Akt3	-0.131261	0.374987	0.769685	-0.641108	0.00224374	0.0199132	-0.0777763	0.598587	0.999711
ENSMUSG00000019710	Mrpl24	-0.302648	0.0958811	0.496463	-0.137643	0.590602	0.806534	-0.138092	0.443798	0.999711
ENSMUSG00000019715	Gle1	0.15183	0.31138	0.730537	-0.0377629	0.858389	0.943321	0.224452	0.133115	0.999711
ENSMUSG00000019718	L3hypdh	-0.462911	0.0776375	0.462099	0.57554	0.11441	0.330611	0.26613	0.275164	0.999711
ENSMUSG00000019726	Lyst	-0.304108	0.35217	0.756309	-0.85249	0.0659065	0.235301	0.428041	0.188781	0.999711
ENSMUSG00000019731	Slc35e1	-0.0639569	0.684181	0.912648	-0.0519124	0.816058	0.926443	-0.102722	0.514853	0.999711
ENSMUSG00000019732	Calr3	0.103776	0.689197	0.913918	0.0596639	0.868228	0.947342	0.193691	0.430449	0.999711
ENSMUSG00000019734	Tmc4	-0.636575	0.272108	0.696521	-2.2624	0.00781718	0.0524617	0.651656	0.248223	0.999711
ENSMUSG00000019738	Polr2i	-0.259624	0.138852	0.565137	0.248104	0.312265	0.586442	-0.138704	0.424543	0.999711
ENSMUSG00000019761	Krt10	0.224679	0.370962	0.766947	1.08921	0.00183236	0.0168273	-0.124816	0.610318	0.999711
ENSMUSG00000019762	Iyd	-0.151829	0.622659	0.890891	-2.16735	6.12296e-06	0.000135981	0.121151	0.690629	0.999711
ENSMUSG00000019763	Rmnd1	-0.440875	0.0788215	0.463435	0.0747606	0.832029	0.932915	-0.188898	0.443707	0.999711
ENSMUSG00000019768	Esr1	0.199829	0.505711	0.844132	-0.719754	0.0885836	0.28354	0.41145	0.147135	0.999711
ENSMUSG00000019772	Vip	-1.68628	3.34794e-09	7.84423e-06	4.14902	4.75009e-24	2.30265e-21	0.0342301	0.90205	0.999711
ENSMUSG00000019773	Fbxo5	-0.793283	0.0524097	0.404196	0.572443	0.329676	0.602793	0.0165557	0.963521	0.999711
ENSMUSG00000019774	Mtrf1l	-0.0807158	0.735768	0.926798	0.376725	0.24674	0.512324	0.0271996	0.904286	0.999711
ENSMUSG00000019775	Rgs17	0.258605	0.124743	0.535624	0.435261	0.0666814	0.237078	0.0996959	0.55069	0.999711
ENSMUSG00000019777	Hdac2	0.118662	0.397171	0.782502	0.350533	0.0749647	0.255109	-0.225371	0.103937	0.999711
ENSMUSG00000019782	Rwdd1	0.208237	0.286266	0.708753	0.10334	0.702532	0.871378	0.0845395	0.660681	0.999711
ENSMUSG00000019785	Clvs2	0.377617	0.0565664	0.410027	0.134825	0.625513	0.830041	-0.0119662	0.950719	0.999711
ENSMUSG00000019789	Hey2	0.414739	0.272418	0.696522	-0.0939006	0.861509	0.944387	0.0850625	0.820115	0.999711
ENSMUSG00000019790	Stxbp5	0.184952	0.210292	0.64861	-0.162776	0.433639	0.695901	-0.0267178	0.853952	0.999711
ENSMUSG00000019791	Hint3	0.00138649	0.99456	0.998866	-0.0829688	0.769229	0.90515	-0.106957	0.598767	0.999711
ENSMUSG00000019792	Trmt11	0.119093	0.549473	0.861561	0.371156	0.178002	0.427097	-0.0122364	0.948772	0.999711
ENSMUSG00000019794	Katna1	-0.242614	0.181306	0.614464	-0.0377561	0.881864	0.953785	-0.0578804	0.741226	0.999711
ENSMUSG00000019795	Pcmt1	0.513055	0.0036658	0.140536	0.23638	0.342033	0.615737	-0.076102	0.665269	0.999711
ENSMUSG00000019796	Lrp11	0.177529	0.337826	0.748016	-0.0833934	0.750177	0.894941	-0.0151074	0.935063	0.999711
ENSMUSG00000019797	1700021F05Rik	-0.0147708	0.931309	0.981362	0.300746	0.207929	0.465743	-0.238196	0.157614	0.999711
ENSMUSG00000019802	Sec63	0.131606	0.331556	0.742554	-0.205323	0.287355	0.559489	0.0410852	0.762967	0.999711
ENSMUSG00000019803	Nr2e1	-0.410347	0.264956	0.692669	2.28103	2.15275e-05	0.000404051	-0.336865	0.360989	0.999711
ENSMUSG00000019804	Snx3	0.0476112	0.813195	0.948474	0.661104	0.0202427	0.10493	-0.201729	0.315705	0.999711
ENSMUSG00000019806	Aig1	0.0237644	0.917393	0.97835	0.242795	0.45362	0.710644	-0.0126666	0.956009	0.999711
ENSMUSG00000019808	Adat2	0.143203	0.583824	0.875356	0.600898	0.0762756	0.258074	-0.0124639	0.958942	0.999711
ENSMUSG00000019809	Pex3	0.343977	0.0242937	0.298794	-0.0124106	0.95367	0.981025	0.104451	0.484467	0.999711
ENSMUSG00000019810	Fuca2	0.0879762	0.644637	0.89702	0.0633172	0.814131	0.925715	0.11347	0.552089	0.999711
ENSMUSG00000019813	Cep57l1	-0.137925	0.61978	0.890621	0.0282811	0.941931	0.977094	0.126007	0.636758	0.999711
ENSMUSG00000019814	Ltv1	0.145845	0.449383	0.811904	0.260595	0.333204	0.60644	-0.232999	0.219437	0.999711
ENSMUSG00000019817	Plagl1	0.373369	0.0924717	0.491493	0.261079	0.40196	0.669282	0.0940251	0.660299	0.999711
ENSMUSG00000019818	Cd164	0.246893	0.300457	0.721158	0.802047	0.0175894	0.0955916	-0.0769944	0.746636	0.999711
ENSMUSG00000019820	Utrn	-0.17709	0.325091	0.739101	1.18331	3.81756e-06	9.00458e-05	-0.153832	0.395585	0.999711
ENSMUSG00000019822	Smpd2	-0.157172	0.634556	0.893156	-0.466042	0.326567	0.599607	0.141102	0.673321	0.999711
ENSMUSG00000019823	Mical1	0.672973	0.36562	0.764367	0.724671	0.492656	0.740643	0.0119659	0.987289	0.999711
ENSMUSG00000019826	Zbtb24	0.203949	0.326498	0.739605	0.297171	0.29015	0.562999	-0.156424	0.417221	0.999711
ENSMUSG00000019828	Grm1	-0.296259	0.163722	0.591885	1.1948	7.99813e-05	0.0012748	-0.0693228	0.744762	0.999711
ENSMUSG00000019831	Wasf1	0.578337	0.000949246	0.0695026	-0.554343	0.0245193	0.120818	0.0845734	0.626684	0.999711
ENSMUSG00000019832	Rab32	-0.347871	0.380432	0.773057	0.848235	0.16925	0.415544	-0.116912	0.771958	0.999711
ENSMUSG00000019837	Gtf3c6	-0.236196	0.225451	0.661116	0.171043	0.534121	0.767444	-0.316798	0.105364	0.999711
ENSMUSG00000019838	Slc16a10	-0.589447	0.0984546	0.501271	-0.91974	0.0707248	0.246491	-0.146492	0.63823	0.999711
ENSMUSG00000019841	Rev3l	0.120443	0.55635	0.864672	0.0266891	0.926673	0.97102	0.244269	0.229763	0.999711
ENSMUSG00000019842	Traf3ip2	0.193038	0.593749	0.880307	0.263886	0.598698	0.811542	0.53353	0.110306	0.999711
ENSMUSG00000019843	Fyn	0.177788	0.384899	0.776662	0.106991	0.711699	0.875717	-0.0429629	0.833841	0.999711
ENSMUSG00000019845	Tube1	0.106829	0.737274	0.927739	0.866474	0.038153	0.16488	0.204154	0.461203	0.999711
ENSMUSG00000019846	Lama4	0.0508838	0.874633	0.964494	-0.531149	0.266407	0.535927	0.00835041	0.979633	0.999711
ENSMUSG00000019848	Popdc3	-0.461529	0.198454	0.636084	0.496317	0.318739	0.592704	0.204713	0.556541	0.999711
ENSMUSG00000019849	Prep	0.196665	0.203308	0.642849	0.49091	0.0193528	0.102202	-0.00169708	0.99077	0.999711
ENSMUSG00000019850	Tnfaip3	0.0880604	0.75653	0.933817	-1.14561	0.0035321	0.0284388	-0.146262	0.57718	0.999711
ENSMUSG00000019851	Perp	0.256156	0.404943	0.78748	-0.624891	0.151956	0.391962	0.422705	0.163208	0.999711
ENSMUSG00000019852	Arfgef3	-0.00944209	0.965587	0.99046	-0.411622	0.183448	0.43482	-0.116306	0.591312	0.999711
ENSMUSG00000019853	Hebp2	-1.61541	6.92772e-06	0.00263216	-0.739733	0.121661	0.343021	-0.184642	0.581532	0.999711
ENSMUSG00000019854	Reps1	0.0763181	0.578673	0.872972	0.223011	0.244456	0.509279	0.174788	0.191064	0.999711
ENSMUSG00000019856	Fam184a	-0.388247	0.0230023	0.292177	-0.0426794	0.860846	0.944387	0.0553688	0.743979	0.999711
ENSMUSG00000019857	Asf1a	0.0990792	0.653648	0.899621	0.325367	0.292083	0.564885	-0.100641	0.642401	0.999711
ENSMUSG00000019861	Gopc	0.578507	0.00107242	0.0728312	0.0246474	0.920296	0.969311	0.0549303	0.750671	0.999711
ENSMUSG00000019863	Qrsl1	-0.082522	0.6219	0.890891	0.353242	0.129189	0.355825	-0.072581	0.659115	0.999711
ENSMUSG00000019864	Rtn4ip1	-0.165549	0.344763	0.752114	0.110431	0.649549	0.844246	-0.225224	0.183123	0.999711
ENSMUSG00000019865	Nmbr	-0.197055	0.638651	0.895652	1.68663	0.0038961	0.0304793	0.395035	0.32529	0.999711
ENSMUSG00000019868	Vta1	0.062615	0.652091	0.898999	0.0478475	0.805396	0.922308	-0.0806863	0.555295	0.999711
ENSMUSG00000019872	Smpdl3a	-0.125587	0.540965	0.85872	-0.870757	0.003008	0.0249477	0.115549	0.575751	0.999711
ENSMUSG00000019873	Reep3	0.249157	0.462345	0.820351	0.378838	0.435223	0.696853	0.0241848	0.943113	0.999711
ENSMUSG00000019874	Fabp7	-0.656959	0.0980543	0.499981	0.152638	0.785251	0.912454	-0.377277	0.341117	0.999711
ENSMUSG00000019876	Pkib	0.307069	0.183886	0.617832	-0.487944	0.123497	0.345816	-0.0417995	0.847402	0.999711
ENSMUSG00000019877	Serinc1	0.625553	0.0148047	0.243734	-0.0861057	0.811781	0.924428	0.0841982	0.741943	0.999711
ENSMUSG00000019878	Hsf2	1.16448	0.00778602	0.191356	-0.0668924	0.912875	0.966552	0.331087	0.442713	0.999711
ENSMUSG00000019880	Rspo3	0.365217	0.0804608	0.466735	-1.49064	6.87057e-07	1.92787e-05	-0.0101264	0.961812	0.999711
ENSMUSG00000019883	Echdc1	-0.0135629	0.959684	0.988998	-0.158262	0.680181	0.860897	-0.263445	0.327574	0.999711
ENSMUSG00000019888	Mgat4c	-0.431945	0.0437846	0.378784	0.759493	0.0123133	0.0738484	-0.0390554	0.854301	0.999711
ENSMUSG00000019889	Ptprk	0.280571	0.206008	0.645322	-1.65906	1.97033e-07	6.39698e-06	0.161038	0.468399	0.999711
ENSMUSG00000019890	Nts	-0.528688	0.128223	0.543757	1.54081	0.00177499	0.0164272	0.0532444	0.87858	0.999711
ENSMUSG00000019891	Dcbld1	0.200748	0.321883	0.73788	-0.485434	0.0930036	0.292166	0.337168	0.100841	0.999711
ENSMUSG00000019892	Lrriq1	-0.63809	0.0797818	0.466309	-2.25537	1.44608e-05	0.000287946	-0.32289	0.341038	0.999711
ENSMUSG00000019894	Slc6a15	0.632837	0.00292891	0.122884	-0.222893	0.456976	0.71329	0.254766	0.229267	0.999711
ENSMUSG00000019897	Ccdc59	0.177401	0.267251	0.694252	0.282791	0.202224	0.458013	-0.00788784	0.95945	0.999711
ENSMUSG00000019899	Lama2	-0.0760767	0.807549	0.947133	-1.62804	0.000441812	0.00525856	0.105217	0.739496	0.999711
ENSMUSG00000019906	Lin7a	0.193009	0.272802	0.696587	-0.498406	0.0450673	0.184872	-0.129268	0.461175	0.999711
ENSMUSG00000019907	Ppp1r12a	-0.1077	0.409849	0.789053	-0.387092	0.0359108	0.158753	-0.113398	0.382049	0.999711
ENSMUSG00000019916	P4ha1	-0.250287	0.340654	0.749909	-0.153267	0.681234	0.861386	-0.346937	0.190037	0.999711
ENSMUSG00000019917	2018-09-10	0.117599	0.770801	0.937688	0.622226	0.300016	0.573315	-0.28471	0.487201	0.999711
ENSMUSG00000019920	Lims1	0.00903535	0.963092	0.989848	-0.406027	0.145569	0.38111	-0.122346	0.529831	0.999711
ENSMUSG00000019923	Zwint	0.365942	0.085983	0.483255	0.689856	0.0220282	0.111997	0.067723	0.750222	0.999711
ENSMUSG00000019927	Ube2d1	0.101446	0.582544	0.874629	0.338653	0.188896	0.442373	-0.0736163	0.683467	0.999711
ENSMUSG00000019929	Dcn	0.73431	0.141637	0.568407	-3.16599	1.16651e-05	0.000240452	0.339922	0.495344	0.999711
ENSMUSG00000019935	Slc17a8	-0.393667	0.153195	0.579084	1.88448	2.62861e-06	6.44905e-05	-0.162	0.546538	0.999711
ENSMUSG00000019936	Epyc	0.415133	0.233246	0.668359	2.39713	7.76927e-07	2.15001e-05	-0.128695	0.680417	0.999711
ENSMUSG00000019943	Atp2b1	-0.00310483	0.987265	0.997189	-0.0528361	0.847714	0.93945	0.0998693	0.607753	0.999711
ENSMUSG00000019944	Rhobtb1	-0.220398	0.51923	0.849263	-1.16163	0.0253746	0.123346	0.0874636	0.803324	0.999711
ENSMUSG00000019945	1700040L02Rik	0.313836	0.350009	0.755493	0.384056	0.387879	0.656349	-0.224246	0.453764	0.999711
ENSMUSG00000019947	Arid5b	-0.179724	0.382873	0.775551	-0.331954	0.251991	0.518743	-0.00661265	0.974066	0.999711
ENSMUSG00000019948	Actr6	0.172958	0.249735	0.680063	0.261159	0.215235	0.473888	0.0442287	0.765483	0.999711
ENSMUSG00000019951	Uhrf1bp1l	0.284464	0.0315804	0.333276	-0.218818	0.242122	0.506691	0.159104	0.227376	0.999711
ENSMUSG00000019952	Poc1b	0.0420704	0.864281	0.961763	0.153597	0.666363	0.853181	0.164605	0.504509	0.999711
ENSMUSG00000019960	Dusp6	0.588594	0.0109786	0.220482	-0.992341	0.00232629	0.0204906	-0.159164	0.486346	0.999711
ENSMUSG00000019961	Tmpo	0.0555601	0.731786	0.925269	0.64892	0.00404599	0.031442	-0.0343276	0.827959	0.999711
ENSMUSG00000019966	Kitl	0.261768	0.276943	0.701374	0.0362747	0.91534	0.967242	-0.13331	0.57711	0.999711
ENSMUSG00000019969	Psen1	-0.0219501	0.923036	0.979184	0.11364	0.723555	0.880267	-0.0459463	0.839452	0.999711
ENSMUSG00000019970	Sgk1	0.640499	0.0313133	0.33166	0.875543	0.0368064	0.161357	0.5272	0.0750768	0.999711
ENSMUSG00000019971	Cep290	-0.497695	0.00151935	0.0851007	0.130818	0.553181	0.781864	-0.140887	0.361896	0.999711
ENSMUSG00000019975	Ikbip	-0.424593	0.0304413	0.329541	1.00859	0.000333833	0.00414945	-0.0575498	0.77167	0.999711
ENSMUSG00000019977	Hbs1l	-0.0585162	0.689325	0.913943	0.0547183	0.790813	0.915226	-0.100166	0.491387	0.999711
ENSMUSG00000019978	Epb41l2	-0.222898	0.396952	0.782329	0.208592	0.577545	0.797152	-0.0643605	0.80739	0.999711
ENSMUSG00000019979	Apaf1	0.183848	0.4243	0.796193	-0.66467	0.037847	0.164213	0.274392	0.208597	0.999711
ENSMUSG00000019984	Med23	-0.381983	0.214681	0.652426	-1.05669	0.0151617	0.0861879	0.467608	0.125063	0.999711
ENSMUSG00000019986	Ahi1	-0.0767866	0.723297	0.922773	0.556327	0.0693508	0.243551	0.27291	0.206277	0.999711
ENSMUSG00000019988	Nedd1	0.0238606	0.941956	0.984322	-0.553245	0.271372	0.542589	0.0961826	0.767998	0.999711
ENSMUSG00000019990	Pde7b	-0.623251	0.0367496	0.355065	1.2834	0.00253245	0.0219489	-0.342364	0.241	0.999711
ENSMUSG00000019996	Map7	-0.0850158	0.666539	0.902952	-0.371727	0.183556	0.434884	0.0701941	0.720317	0.999711
ENSMUSG00000019997	Ctgf	0.018237	0.946311	0.985313	-0.621319	0.114919	0.3318	-0.0998851	0.713803	0.999711
ENSMUSG00000019998	Stx7	0.261596	0.088397	0.487522	0.113947	0.597985	0.811314	-0.0482093	0.751786	0.999711
ENSMUSG00000020000	Moxd1	-1.22768	0.000157963	0.0271009	2.13559	3.79106e-06	8.9571e-05	-0.0850999	0.791267	0.999711
ENSMUSG00000020003	Pex7	-0.059337	0.796161	0.943758	0.431373	0.18326	0.434519	-0.274323	0.231981	0.999711
ENSMUSG00000020009	Ifngr1	-0.0340776	0.888009	0.969498	-0.25521	0.460927	0.716458	0.112463	0.644009	0.999711
ENSMUSG00000020014	Cfap54	0.250345	0.416892	0.7907	-1.08289	0.0157334	0.0885432	0.31115	0.301735	0.999711
ENSMUSG00000020015	Cdk17	0.380326	0.0337462	0.342283	-0.111027	0.659886	0.850512	-0.0472345	0.790485	0.999711
ENSMUSG00000020018	Snrpf	0.305091	0.508671	0.845855	0.372587	0.537153	0.769754	0.0242949	0.953832	0.999711
ENSMUSG00000020019	Ntn4	-0.205829	0.436883	0.804835	2.07398	2.23912e-07	7.15398e-06	0.0566662	0.841907	0.999711
ENSMUSG00000020021	Fgd6	-0.212374	0.695386	0.915406	0.481455	0.533058	0.766652	0.151567	0.781568	0.999711
ENSMUSG00000020022	Ndufa12	-0.0859721	0.70023	0.916557	0.644782	0.0409668	0.17305	-0.137013	0.539233	0.999711
ENSMUSG00000020023	Tmcc3	0.00416185	0.983696	0.996383	1.36099	3.37975e-06	8.02577e-05	-0.0604403	0.766813	0.999711
ENSMUSG00000020024	Cep83	0.0596794	0.750881	0.931758	0.516153	0.0496492	0.197328	-0.141025	0.441732	0.999711
ENSMUSG00000020027	Socs2	0.0181366	0.929725	0.980788	-0.625703	0.0294835	0.137563	0.162814	0.410605	0.999711
ENSMUSG00000020029	Nudt4	-0.0305272	0.882042	0.967416	-0.142273	0.624926	0.829421	-0.211543	0.303989	0.999711
ENSMUSG00000020032	Nuak1	0.11501	0.496525	0.839376	-0.875908	0.000262682	0.00341924	-0.0674213	0.69042	0.999711
ENSMUSG00000020034	Tcp11l2	0.227736	0.152819	0.578094	0.297936	0.184182	0.435709	0.252902	0.108724	0.999711
ENSMUSG00000020037	Rfx4	0.0453665	0.892035	0.970805	0.659494	0.170355	0.416859	0.22773	0.496978	0.999711
ENSMUSG00000020038	Cry1	0.304965	0.248136	0.678394	1.19781	0.00126726	0.0126618	0.26494	0.311223	0.999711
ENSMUSG00000020042	Btbd11	-0.523141	0.0146113	0.24247	3.45995	1.45835e-28	1.28134e-25	-0.160865	0.449653	0.999711
ENSMUSG00000020044	Timp3	0.072172	0.84453	0.95722	1.19101	0.0234779	0.116957	0.100699	0.784354	0.999711
ENSMUSG00000020048	Hsp90b1	-0.115316	0.614249	0.890126	-0.0616562	0.848908	0.940125	-0.0922288	0.687151	0.999711
ENSMUSG00000020052	Ascl1	-0.4606	0.163861	0.591885	-0.38673	0.406391	0.673482	-0.23024	0.474913	0.999711
ENSMUSG00000020053	Igf1	-0.320128	0.246347	0.676546	3.09289	1.11705e-14	1.57035e-12	0.248762	0.36364	0.999711
ENSMUSG00000020056	Washc3	0.0291188	0.87484	0.964494	0.0525123	0.839313	0.935766	-0.00209419	0.990886	0.999711
ENSMUSG00000020057	Dram1	0.254762	0.509443	0.845855	-0.079133	0.883323	0.954089	0.213721	0.52158	0.999711
ENSMUSG00000020059	Sycp3	0.512832	0.258737	0.688887	-0.165616	0.795977	0.917653	0.209635	0.654113	0.999711
ENSMUSG00000020061	Mybpc1	-0.378765	0.346867	0.753789	3.73905	1.66873e-10	1.14434e-08	0.271043	0.493181	0.999711
ENSMUSG00000020063	Sirt1	0.173036	0.370208	0.766591	-0.475555	0.0783786	0.263222	0.0816116	0.654399	0.999711
ENSMUSG00000020064	Herc4	0.0534389	0.771296	0.937851	-0.264342	0.304088	0.577841	-0.125196	0.483608	0.999711
ENSMUSG00000020067	Mypn	-0.184513	0.604642	0.886902	0.609781	0.20261	0.45822	0.0964531	0.769344	0.999711
ENSMUSG00000020069	Hnrnph3	-0.476262	0.0103392	0.21501	0.346515	0.1819	0.432755	0.0406143	0.822394	0.999711
ENSMUSG00000020070	Rufy2	-0.0396765	0.82198	0.951045	-0.0714039	0.774263	0.907921	0.262285	0.131916	0.999711
ENSMUSG00000020072	Pbld2	-0.029275	0.940849	0.984053	-0.89256	0.0958922	0.297715	0.547016	0.112421	0.999711
ENSMUSG00000020074	Ccar1	0.144125	0.269462	0.695555	-0.0284192	0.877289	0.951585	0.220539	0.089426	0.999711
ENSMUSG00000020075	Ddx21	0.196681	0.35747	0.759914	-0.0878684	0.771365	0.906471	0.125198	0.559438	0.999711
ENSMUSG00000020076	Ddx50	0.33932	0.0163253	0.254436	0.172627	0.37648	0.645741	0.0147075	0.913412	0.999711
ENSMUSG00000020078	Vps26a	0.319623	0.0159413	0.251616	-0.519042	0.00528466	0.0386333	-0.127238	0.326773	0.999711
ENSMUSG00000020079	Supv3l1	-0.218746	0.166426	0.594696	0.0362566	0.86888	0.94754	-0.0148849	0.922527	0.999711
ENSMUSG00000020080	Hkdc1	0.417453	0.113726	0.52044	-2.78627	4.98166e-13	5.03829e-11	-0.0595989	0.819552	0.999711
ENSMUSG00000020083	2010107G23Rik	0.159451	0.496525	0.839376	0.295518	0.362777	0.633597	0.000516902	0.998181	0.999748
ENSMUSG00000020085	Aifm2	-0.523006	0.0300666	0.327149	1.10631	0.00129604	0.0129218	-0.0926333	0.704495	0.999711
ENSMUSG00000020086	H2afy2	0.368772	0.0410435	0.368919	0.628775	0.012767	0.0758897	0.0566484	0.75736	0.999711
ENSMUSG00000020087	Tysnd1	-0.29156	0.196767	0.634291	-0.249923	0.429971	0.692624	-0.194772	0.387835	0.999711
ENSMUSG00000020088	Sar1a	0.0931101	0.44046	0.807344	-0.231309	0.174696	0.42249	0.058926	0.62459	0.999711
ENSMUSG00000020089	Ppa1	0.0413015	0.775682	0.938751	0.441919	0.0300325	0.139293	-0.166311	0.247403	0.999711
ENSMUSG00000020091	Eif4ebp2	-0.224332	0.451243	0.813727	0.598862	0.16003	0.403399	-0.241689	0.419974	0.999711
ENSMUSG00000020092	Pald1	-0.074555	0.785359	0.940687	-0.765721	0.0562354	0.213376	0.281521	0.320126	0.999711
ENSMUSG00000020096	Tbata	0.015164	0.946553	0.985385	-2.33075	1.6236e-12	1.52163e-10	-0.0759488	0.721221	0.999711
ENSMUSG00000020097	Sgpl1	-0.00769736	0.967371	0.991381	-0.222714	0.410159	0.676206	0.140326	0.453915	0.999711
ENSMUSG00000020098	Pcbd1	-0.0479795	0.852269	0.958874	1.35105	0.000107599	0.00163527	-0.195937	0.426138	0.999711
ENSMUSG00000020099	Unc5b	-0.283218	0.281151	0.704995	0.514378	0.178295	0.427593	-0.135025	0.609292	0.999711
ENSMUSG00000020100	Slc29a3	-0.03927	0.884483	0.968735	-0.2531	0.526973	0.762316	0.00141101	0.995836	0.999711
ENSMUSG00000020101	Vsir	-0.590191	0.137072	0.561262	0.413027	0.474155	0.727696	-0.637244	0.113631	0.999711
ENSMUSG00000020102	Slc16a7	-0.234931	0.346158	0.753028	-0.416497	0.239993	0.503966	-0.587997	0.0187622	0.999711
ENSMUSG00000020105	Lrig3	-0.611581	0.0406691	0.368457	0.192744	0.665925	0.853146	0.321769	0.306135	0.999711
ENSMUSG00000020107	Anapc16	0.196428	0.243052	0.673706	0.211057	0.372663	0.642651	-0.0944119	0.572496	0.999711
ENSMUSG00000020108	Ddit4	0.433596	0.128103	0.543579	0.558522	0.161946	0.406284	0.350879	0.209643	0.999711
ENSMUSG00000020109	Dnajb12	0.368202	0.0098768	0.211659	-0.0234203	0.907633	0.964356	0.0624246	0.666549	0.999711
ENSMUSG00000020111	Micu1	0.0427747	0.725914	0.923903	-0.0201943	0.906311	0.963994	0.046571	0.701183	0.999711
ENSMUSG00000020114	Cand1	0.0703788	0.595383	0.881506	0.0898061	0.630602	0.83396	0.0488938	0.710217	0.999711
ENSMUSG00000020115	Tbk1	0.350012	0.0371088	0.356351	-0.00217257	0.992781	0.996609	0.0724555	0.654415	0.999711
ENSMUSG00000020116	Pno1	0.355677	0.0957113	0.496361	0.427599	0.150985	0.390246	-0.00225503	0.991419	0.999711
ENSMUSG00000020120	Plek	-0.0439562	0.879102	0.965803	-0.358532	0.385839	0.654534	0.255064	0.379683	0.999711
ENSMUSG00000020121	Srgap1	-0.271912	0.170371	0.60065	2.03574	9.0824e-13	8.9287e-11	-0.222346	0.261108	0.999711
ENSMUSG00000020122	Egfr	0.0926156	0.730091	0.925086	1.95378	7.27529e-07	2.02929e-05	0.230617	0.39643	0.999711
ENSMUSG00000020123	Avpr1a	-2.15281	0.000114773	0.0237277	-1.06919	0.141003	0.374662	0.264701	0.610292	0.999711
ENSMUSG00000020124	Usp15	0.109017	0.577592	0.872439	-0.0545367	0.843007	0.937727	-0.0247943	0.898141	0.999711
ENSMUSG00000020128	Vps54	-0.0634019	0.761179	0.93437	-0.739958	0.0125742	0.0749811	0.132606	0.517383	0.999711
ENSMUSG00000020130	Tbc1d15	0.284985	0.129083	0.545867	0.203804	0.441155	0.701331	0.0567509	0.760185	0.999711
ENSMUSG00000020131	Pcsk4	0.986378	0.00241222	0.110373	-0.774471	0.083704	0.274484	0.706542	0.0274284	0.999711
ENSMUSG00000020132	Rab21	-0.307359	0.182743	0.616293	0.133637	0.680271	0.860933	-0.136333	0.550598	0.999711
ENSMUSG00000020133	2310011J03Rik	-0.138726	0.453285	0.814527	-0.32484	0.209014	0.467014	-0.0926433	0.612883	0.999711
ENSMUSG00000020134	Peli1	0.39769	0.0591465	0.416574	-0.026608	0.928614	0.971722	0.174277	0.404527	0.999711
ENSMUSG00000020135	Apc2	0.093909	0.736752	0.927413	0.159782	0.686592	0.86411	0.317037	0.260551	0.999711
ENSMUSG00000020137	Thap2	-0.101567	0.66582	0.902952	0.28678	0.386883	0.65512	-0.132102	0.548352	0.999711
ENSMUSG00000020140	Lgr5	0.524888	0.0617745	0.422207	0.483278	0.224556	0.486069	-0.0500233	0.86184	0.999711
ENSMUSG00000020142	Slc1a4	0.00702821	0.968964	0.99182	0.230586	0.36875	0.639146	-0.0958068	0.597437	0.999711
ENSMUSG00000020143	Dock2	-0.669638	0.130837	0.549209	-0.166234	0.807797	0.923403	-0.380452	0.403436	0.999711
ENSMUSG00000020149	Rab1a	0.207102	0.12136	0.53038	0.111415	0.554449	0.782417	-0.13633	0.305722	0.999711
ENSMUSG00000020150	Gamt	-0.487505	0.0233815	0.29348	0.378868	0.219795	0.479645	-0.566819	0.00926418	0.999711
ENSMUSG00000020151	Ptprr	0.346263	0.149126	0.575753	-0.379669	0.263848	0.533016	0.130331	0.587311	0.999711
ENSMUSG00000020152	Actr2	0.81227	5.39143e-05	0.0130321	0.278663	0.324149	0.597903	0.0126391	0.949538	0.999711
ENSMUSG00000020153	Ndufs7	0.0112126	0.94028	0.983935	0.448316	0.0338755	0.151916	-0.110204	0.461136	0.999711
ENSMUSG00000020154	Ptprb	0.32055	0.562807	0.866683	-0.116009	0.883256	0.954089	0.02467	0.964837	0.999711
ENSMUSG00000020156	Mum1	0.0210159	0.914319	0.97742	-0.0157113	0.953162	0.980818	0.0146028	0.937766	0.999711
ENSMUSG00000020160	Meis1	-0.394201	0.223807	0.660419	2.45289	1.52416e-07	5.10159e-06	0.16125	0.611181	0.999711
ENSMUSG00000020163	Uqcr11	-0.0532305	0.838188	0.955367	0.285495	0.43853	0.69873	0.00276985	0.991526	0.999711
ENSMUSG00000020166	Cnot2	0.081562	0.618078	0.890621	0.0558323	0.807421	0.923274	0.0352457	0.82593	0.999711
ENSMUSG00000020167	Tcf3	0.147951	0.629997	0.892502	0.336661	0.453116	0.710373	0.178915	0.568139	0.999711
ENSMUSG00000020170	Frs2	0.198318	0.240287	0.671813	-0.101447	0.675781	0.858055	0.201634	0.232002	0.999711
ENSMUSG00000020171	Yeats4	-0.0621149	0.743005	0.929285	0.269329	0.303141	0.576868	-0.254164	0.168174	0.999711
ENSMUSG00000020173	Cobl	-0.278618	0.217554	0.654827	-1.66384	2.10112e-07	6.75917e-06	-0.572192	0.0109837	0.999711
ENSMUSG00000020175	Rab36	-0.0707673	0.617681	0.890621	-0.878355	9.9824e-06	0.000208828	0.150522	0.273332	0.999711
ENSMUSG00000020176	Grb10	0.111609	0.62603	0.892082	0.835456	0.00939713	0.0605153	-0.0237147	0.915802	0.999711
ENSMUSG00000020178	Adora2a	-1.64922	4.39759e-06	0.00176632	3.85059	4.3705e-13	4.55114e-11	-0.168673	0.635079	0.999711
ENSMUSG00000020180	Snrpd3	0.0736954	0.60437	0.886887	0.13202	0.509399	0.752747	0.0341926	0.808703	0.999711
ENSMUSG00000020181	Nav3	0.463815	0.0255026	0.303057	-0.17215	0.557413	0.783521	0.182671	0.378584	0.999711
ENSMUSG00000020182	Ddc	0.30699	0.301931	0.723091	0.830328	0.0559485	0.212574	0.0669286	0.824585	0.999711
ENSMUSG00000020183	Cpm	0.0888567	0.666544	0.902952	0.0989215	0.74584	0.892342	0.145023	0.475865	0.999711
ENSMUSG00000020184	Mdm2	-0.0254286	0.869481	0.963357	-0.0404345	0.852894	0.942207	0.0953126	0.530791	0.999711
ENSMUSG00000020186	Csrp2	-0.414698	0.195744	0.633174	0.108073	0.808889	0.923658	-0.0488822	0.877109	0.999711
ENSMUSG00000020189	Osbpl8	-0.11229	0.554641	0.864272	0.289015	0.277856	0.549382	-0.0756563	0.684231	0.999711
ENSMUSG00000020190	Mknk2	0.0945511	0.582066	0.874405	0.193456	0.43305	0.695334	0.0545364	0.756056	0.999711
ENSMUSG00000020193	Zpbp	0.627525	0.0917139	0.491493	1.26804	0.0101537	0.0642398	0.227005	0.49352	0.999711
ENSMUSG00000020196	Cabin1	-0.00974664	0.960885	0.989458	-0.620614	0.027395	0.130682	0.118328	0.550339	0.999711
ENSMUSG00000020198	Ap3d1	0.041775	0.7942	0.943043	-0.00329778	0.988373	0.994884	-0.0493744	0.757622	0.999711
ENSMUSG00000020205	Phlda1	-0.47542	0.0383116	0.358817	2.00299	3.29326e-10	2.08489e-08	-0.227766	0.300796	0.999711
ENSMUSG00000020211	Sf3a2	-0.197443	0.407626	0.788518	0.0148721	0.963168	0.985454	0.22126	0.327996	0.999711
ENSMUSG00000020212	Mdm1	0.0190645	0.944298	0.984507	0.861813	0.016989	0.0937328	-0.16888	0.465823	0.999711
ENSMUSG00000020216	Jsrp1	0.00192813	0.996136	0.999265	-0.350382	0.459237	0.715103	-0.454438	0.164469	0.999711
ENSMUSG00000020218	Wif1	-1.54679	5.12762e-05	0.0126463	3.48876	5.81861e-09	2.69073e-07	0.0208786	0.957402	0.999711
ENSMUSG00000020219	Timm13	-0.0835672	0.593823	0.880308	0.189159	0.390769	0.658996	-0.267103	0.0874177	0.999711
ENSMUSG00000020220	Vps13d	-0.0969988	0.592808	0.879603	-0.559226	0.0297754	0.138466	0.1391	0.440868	0.999711
ENSMUSG00000020224	Llph	-0.12065	0.556045	0.864604	-0.0540641	0.846032	0.939086	-0.312994	0.108916	0.999711
ENSMUSG00000020225	Tmbim4	0.188767	0.339324	0.748412	0.232732	0.404863	0.672832	-0.0281819	0.887226	0.999711
ENSMUSG00000020228	Helb	0.0541857	0.863836	0.961763	0.521736	0.258248	0.526065	-0.217729	0.486052	0.999711
ENSMUSG00000020230	Prmt2	-0.152284	0.52995	0.853906	0.423145	0.215996	0.47425	-0.332814	0.168725	0.999711
ENSMUSG00000020231	Dip2a	-0.112121	0.5119	0.847227	-0.0354835	0.883924	0.954203	0.0457395	0.789568	0.999711
ENSMUSG00000020232	Hmg20b	-0.260919	0.391317	0.779086	0.310634	0.464883	0.719985	-0.49263	0.115135	0.999711
ENSMUSG00000020235	Fzr1	0.118763	0.541139	0.85872	0.34877	0.200692	0.45654	-0.0839227	0.662434	0.999711
ENSMUSG00000020238	Ncln	0.00296249	0.992469	0.998435	-0.391322	0.380518	0.650081	0.0943607	0.767193	0.999711
ENSMUSG00000020241	Col6a2	-0.147885	0.560141	0.865611	0.184063	0.616043	0.82558	0.406016	0.116685	0.999711
ENSMUSG00000020246	Hcfc2	0.0492796	0.762077	0.934793	-0.675683	0.00312938	0.0258174	-0.031313	0.843111	0.999711
ENSMUSG00000020248	Nfyb	0.232745	0.154656	0.581048	0.0995415	0.666079	0.853181	-0.00384928	0.981008	0.999711
ENSMUSG00000020250	Txnrd1	0.0181399	0.91738	0.97835	0.631259	0.0102307	0.0645239	-0.137728	0.426612	0.999711
ENSMUSG00000020251	Glt8d2	0.689714	0.108798	0.513687	-1.97314	0.00134207	0.0132585	-0.428671	0.315586	0.999711
ENSMUSG00000020253	Ppm1m	0.0847959	0.66107	0.902015	-0.608478	0.0265279	0.127454	-0.181538	0.35283	0.999711
ENSMUSG00000020255	D10Wsu102e	-0.0427308	0.82223	0.951045	-0.333317	0.212379	0.471737	-0.0224298	0.90477	0.999711
ENSMUSG00000020256	Aldh1l2	-0.0295067	0.924232	0.979327	-0.279922	0.535629	0.768589	0.228885	0.469136	0.999711
ENSMUSG00000020257	Wdr82	-0.123691	0.483645	0.833285	0.0353437	0.887221	0.955239	-0.183127	0.297578	0.999711
ENSMUSG00000020258	Glyctk	-0.0255879	0.918121	0.978507	0.518222	0.144569	0.379662	-0.398449	0.126047	0.999711
ENSMUSG00000020260	Pofut2	0.0795095	0.703803	0.917173	0.276902	0.348874	0.62287	-0.0081545	0.969346	0.999711
ENSMUSG00000020261	Slc36a1	-0.159502	0.476888	0.82992	-0.422129	0.184266	0.43573	-0.0954483	0.672116	0.999711
ENSMUSG00000020262	Adarb1	-0.20598	0.140783	0.567172	1.04593	1.47229e-07	4.95154e-06	-0.194778	0.16607	0.999711
ENSMUSG00000020263	Appl2	-0.44083	0.135496	0.558616	-0.20179	0.631392	0.834416	0.0581579	0.843891	0.999711
ENSMUSG00000020265	Sumo3	0.477975	0.000829194	0.065872	0.654357	0.00113958	0.011521	0.0477979	0.736065	0.999711
ENSMUSG00000020267	Hint1	0.208042	0.251648	0.681446	0.571577	0.0258059	0.124795	-0.00891337	0.960777	0.999711
ENSMUSG00000020268	Lyrm7	-0.210885	0.403028	0.786961	-0.0987447	0.778362	0.909879	-0.310488	0.205988	0.999711
ENSMUSG00000020271	Fbxw11	0.0904614	0.579204	0.873372	-0.116833	0.612081	0.822903	-0.20511	0.206555	0.999711
ENSMUSG00000020272	Stk10	-0.600979	0.173752	0.604904	-1.06145	0.106431	0.316323	-0.169827	0.707016	0.999711
ENSMUSG00000020273	Papolg	0.275049	0.219964	0.65722	-0.0869942	0.7806	0.910376	0.0490125	0.820653	0.999711
ENSMUSG00000020275	Rel	-1.11419	0.00977874	0.210862	-1.83548	0.00132403	0.0131449	0.285269	0.412877	0.999711
ENSMUSG00000020277	Pfkl	-0.044765	0.803761	0.946218	-0.628381	0.0134388	0.0787504	-0.160955	0.369817	0.999711
ENSMUSG00000020280	Pus10	-0.0202188	0.948052	0.985833	-0.860068	0.048991	0.195825	0.335514	0.264377	0.999711
ENSMUSG00000020282	Rhbdf1	0.147458	0.654828	0.900239	-0.762518	0.118894	0.338951	0.348212	0.303049	0.999711
ENSMUSG00000020283	Pex13	0.287574	0.0778496	0.462235	0.521022	0.0231868	0.116042	-0.0347659	0.830692	0.999711
ENSMUSG00000020284	1810043G02Rik	0.450538	0.00133259	0.0795802	-0.149217	0.447414	0.706079	0.256772	0.0682351	0.999711
ENSMUSG00000020287	Mpg	0.178126	0.45986	0.81894	-0.477115	0.156699	0.398996	0.491183	0.0357223	0.999711
ENSMUSG00000020288	Ahsa2	-0.346843	0.0582292	0.414264	-0.287331	0.257372	0.525345	-0.0521944	0.765218	0.999711
ENSMUSG00000020289	Nprl3	0.37224	0.0128696	0.229852	0.295803	0.158994	0.402219	0.170205	0.248679	0.999711
ENSMUSG00000020290	Xpo1	-0.0575193	0.711192	0.919385	-0.211475	0.333084	0.60631	-0.125712	0.410867	0.999711
ENSMUSG00000020297	Nsg2	0.222812	0.255082	0.68598	0.292328	0.290808	0.563497	0.102569	0.600475	0.999711
ENSMUSG00000020300	Cpeb4	-0.0475004	0.758361	0.934281	-0.434969	0.0461766	0.187806	0.111177	0.463702	0.999711
ENSMUSG00000020303	Stc2	-0.598283	0.0360725	0.352107	0.599528	0.135481	0.366339	0.13334	0.630676	0.999711
ENSMUSG00000020305	Asb3	0.267164	0.125347	0.537796	0.386023	0.113197	0.32831	-0.0466955	0.785536	0.999711
ENSMUSG00000020307	Cdc34	0.0472225	0.821184	0.951045	0.0657214	0.821932	0.92908	-0.0882482	0.672525	0.999711
ENSMUSG00000020308	Tpgs1	0.219911	0.260147	0.689692	0.239624	0.377809	0.647423	0.0174152	0.928247	0.999711
ENSMUSG00000020309	Chac2	0.119846	0.60746	0.888841	0.60046	0.0648691	0.233409	-0.269843	0.236174	0.999711
ENSMUSG00000020311	Erlec1	0.276226	0.100944	0.50324	0.107141	0.653366	0.846337	0.343104	0.0431992	0.999711
ENSMUSG00000020312	Shc2	-0.164023	0.390315	0.778746	-0.319782	0.235215	0.498628	0.0192148	0.919176	0.999711
ENSMUSG00000020315	Sptbn1	0.337521	0.639677	0.895652	0.51991	0.60995	0.820622	0.435353	0.546267	0.999711
ENSMUSG00000020319	Wdpcp	-0.178018	0.247618	0.677671	-0.992658	4.89817e-06	0.000111965	-0.0122007	0.935267	0.999711
ENSMUSG00000020321	Mdh1	0.226875	0.260032	0.689692	0.701432	0.0138587	0.0806703	0.0511024	0.799607	0.999711
ENSMUSG00000020323	Prss57	-0.0542247	0.89724	0.972293	-3.04539	2.91402e-06	7.08743e-05	-0.37072	0.415087	0.999711
ENSMUSG00000020326	Ccng1	-0.250554	0.268233	0.694492	-0.514403	0.108382	0.319446	-0.516335	0.0224983	0.999711
ENSMUSG00000020328	Nudcd2	-0.118482	0.620742	0.890751	-0.250717	0.455534	0.712274	0.0801006	0.735242	0.999711
ENSMUSG00000020329	Polrmt	-0.181004	0.272555	0.696522	0.0449763	0.846594	0.939086	0.0707414	0.672958	0.999711
ENSMUSG00000020330	Hmmr	-0.0150825	0.962292	0.989552	-1.61464	0.000395967	0.00478774	0.0770203	0.787532	0.999711
ENSMUSG00000020331	Hcn2	-0.337215	0.118603	0.525772	0.0786371	0.801404	0.920888	0.166589	0.476723	0.999711
ENSMUSG00000020333	Acsl6	-0.0555949	0.813424	0.948474	0.208416	0.531973	0.765723	0.0241698	0.918344	0.999711
ENSMUSG00000020334	Slc22a4	0.488646	0.0561136	0.410027	-0.623427	0.0912084	0.288851	0.354812	0.166793	0.999711
ENSMUSG00000020335	Zfp354b	-0.567622	0.042229	0.373368	-0.369399	0.302855	0.576703	-0.0937208	0.687626	0.999711
ENSMUSG00000020340	Cyfip2	0.230476	0.115953	0.522876	-0.267299	0.197134	0.452636	-0.0299706	0.837853	0.999711
ENSMUSG00000020346	Mgat1	-0.462928	0.0144382	0.241477	0.00650304	0.980503	0.991709	-0.307591	0.106051	0.999711
ENSMUSG00000020349	Ppp2ca	0.192896	0.304554	0.724683	0.519022	0.0506489	0.199894	-0.10517	0.575075	0.999711
ENSMUSG00000020358	Hnrnpab	0.190726	0.314931	0.733604	0.300184	0.258529	0.526108	-0.00587136	0.97496	0.999711
ENSMUSG00000020359	Phykpl	0.275489	0.18185	0.615338	-0.327334	0.264176	0.533283	0.185181	0.362425	0.999711
ENSMUSG00000020361	Hspa4	-0.0871303	0.519406	0.849263	0.0119774	0.949831	0.980017	-0.107844	0.420838	0.999711
ENSMUSG00000020362	Cnot6	0.124205	0.602142	0.885555	0.677325	0.0452814	0.185383	0.0231815	0.922392	0.999711
ENSMUSG00000020363	Gfpt2	-0.0510294	0.848273	0.95804	2.81687	1.26094e-13	1.45298e-11	-0.161933	0.531796	0.999711
ENSMUSG00000020364	Zfp354a	0.234167	0.308398	0.728036	0.469612	0.135236	0.365888	0.0512538	0.813537	0.999711
ENSMUSG00000020366	Mapk9	0.064805	0.611377	0.889152	0.495838	0.00580296	0.0415692	-0.169777	0.17994	0.999711
ENSMUSG00000020368	Canx	0.205552	0.34394	0.751627	0.278689	0.364147	0.634616	-0.0837968	0.699545	0.999711
ENSMUSG00000020372	Rack1	-0.238311	0.181822	0.615338	-0.0860357	0.733218	0.884879	0.0400165	0.822703	0.999711
ENSMUSG00000020374	Rasgef1c	0.0460024	0.782948	0.940294	-0.867631	0.000246176	0.00324039	-0.16169	0.331414	0.999711
ENSMUSG00000020375	Rufy1	0.198927	0.24294	0.673706	0.0225673	0.924934	0.970654	0.0721626	0.668579	0.999711
ENSMUSG00000020376	Rnf130	-0.351165	0.0391303	0.362858	-0.341325	0.161899	0.40628	0.00460391	0.978649	0.999711
ENSMUSG00000020377	Ltc4s	-0.755818	0.0384737	0.359298	0.612055	0.265318	0.534654	-0.327406	0.383413	0.999711
ENSMUSG00000020380	Rad50	0.140463	0.426997	0.798317	-0.179215	0.47644	0.728735	0.0992199	0.572595	0.999711
ENSMUSG00000020381	Mrnip	0.900982	0.00634611	0.175617	0.0128953	0.97558	0.990058	0.691382	0.0293817	0.999711
ENSMUSG00000020385	Clk4	-0.0700108	0.776557	0.939151	-0.489239	0.16026	0.40373	0.439552	0.0731097	0.999711
ENSMUSG00000020386	Sar1b	0.349166	0.0536851	0.405791	0.363527	0.154764	0.39601	0.0658706	0.715504	0.999711
ENSMUSG00000020387	Jade2	0.282993	0.151893	0.577108	0.31065	0.266817	0.536227	0.148228	0.452488	0.999711
ENSMUSG00000020388	Pdlim4	-0.306144	0.430178	0.800543	0.168423	0.770551	0.906098	-0.0477381	0.903793	0.999711
ENSMUSG00000020389	Cdkl3	0.431195	0.046641	0.386499	0.514867	0.0868132	0.280457	0.332379	0.118795	0.999711
ENSMUSG00000020390	Ube2b	0.287	0.115923	0.522876	0.228911	0.373444	0.643289	-0.157348	0.386092	0.999711
ENSMUSG00000020392	Cdkn2aipnl	0.17244	0.202075	0.640414	0.0238606	0.898463	0.960648	-0.0206975	0.874567	0.999711
ENSMUSG00000020393	Kremen1	-0.185662	0.449241	0.811904	0.191279	0.607406	0.818138	0.267663	0.309384	0.999711
ENSMUSG00000020396	Nefh	-0.298882	0.086746	0.484608	0.310255	0.207391	0.465106	-0.424917	0.0152275	0.999711
ENSMUSG00000020397	Med7	0.0790182	0.7221	0.922593	0.0698443	0.820509	0.928598	-0.083311	0.700678	0.999711
ENSMUSG00000020399	Havcr2	0.275372	0.472193	0.826277	0.897611	0.124844	0.348247	0.280609	0.464289	0.999711
ENSMUSG00000020400	Tnip1	0.00807973	0.958933	0.988874	0.0313587	0.885002	0.954458	-0.157326	0.298026	0.999711
ENSMUSG00000020402	Vdac1	0.140888	0.329932	0.741635	0.470913	0.0212023	0.108558	-0.0466825	0.746352	0.999711
ENSMUSG00000020407	Upp1	-0.551631	0.216711	0.654462	0.407755	0.534065	0.767443	-0.205613	0.648677	0.999711
ENSMUSG00000020409	Slu7	0.0855952	0.550404	0.86203	0.111068	0.582879	0.800753	0.065714	0.645384	0.999711
ENSMUSG00000020411	Nipal4	0.100673	0.749467	0.931215	0.169014	0.725431	0.881015	0.156897	0.617865	0.999711
ENSMUSG00000020412	Ascc2	-0.422325	0.0269109	0.311883	-0.622118	0.0222654	0.112874	0.107377	0.566366	0.999711
ENSMUSG00000020413	Hus1	-0.212839	0.432254	0.80117	0.321923	0.410056	0.676116	-0.108769	0.691325	0.999711
ENSMUSG00000020415	Pttg1	-0.18281	0.423945	0.796023	0.139408	0.665173	0.852659	-0.352469	0.121556	0.999711
ENSMUSG00000020422	Tns3	0.262521	0.564594	0.867554	0.260887	0.689893	0.865707	0.434944	0.343188	0.999711
ENSMUSG00000020423	Btg2	0.407313	0.259628	0.68943	-0.942385	0.0652186	0.234008	0.0438494	0.902765	0.999711
ENSMUSG00000020427	Igfbp3	0.204769	0.540555	0.858477	0.733524	0.123319	0.34555	0.385479	0.262321	0.999711
ENSMUSG00000020430	Pes1	-0.146608	0.413606	0.789507	-0.178198	0.480019	0.731185	0.081398	0.64802	0.999711
ENSMUSG00000020431	Adcy1	-0.0602689	0.788987	0.941251	-0.618197	0.0526937	0.204519	-0.0263563	0.906896	0.999711
ENSMUSG00000020432	Tcn2	-0.365479	0.325276	0.739101	0.327252	0.539247	0.771341	-0.202943	0.585992	0.999711
ENSMUSG00000020435	Osbp2	-0.274468	0.11685	0.523344	-1.12221	5.59618e-06	0.000126075	-0.0315382	0.854532	0.999711
ENSMUSG00000020436	Gabrg2	0.0752427	0.769721	0.937503	0.0328424	0.928011	0.971533	-0.14957	0.560742	0.999711
ENSMUSG00000020439	Smtn	0.449633	0.391568	0.779218	2.56973	0.00122302	0.0122633	-0.543928	0.347238	0.999711
ENSMUSG00000020440	Arf5	0.379884	0.075662	0.456445	0.132158	0.660917	0.850686	-0.165784	0.438319	0.999711
ENSMUSG00000020441	2310033P09Rik	0.0766698	0.682026	0.911727	0.407766	0.112774	0.327557	-0.156912	0.385458	0.999711
ENSMUSG00000020444	Guk1	0.173452	0.379137	0.77246	0.196875	0.479668	0.731047	0.206097	0.297077	0.999711
ENSMUSG00000020447	Npc1l1	0.259311	0.435619	0.803837	-2.28856	5.14399e-06	0.000117393	0.160034	0.627093	0.999711
ENSMUSG00000020448	Rnf185	0.208858	0.188366	0.622663	0.525425	0.0173993	0.0949153	-0.0475271	0.758094	0.999711
ENSMUSG00000020451	Limk2	-0.0775837	0.510005	0.846128	0.138246	0.405533	0.673159	-0.00279256	0.981125	0.999711
ENSMUSG00000020453	Patz1	0.0506778	0.741939	0.928966	0.602171	0.00525935	0.0384947	0.199184	0.188962	0.999711
ENSMUSG00000020454	Eif4enif1	0.0846624	0.617714	0.890621	-0.369021	0.121655	0.343021	0.0620559	0.709243	0.999711
ENSMUSG00000020455	Trim11	0.130529	0.422762	0.794968	0.467965	0.0396237	0.169066	0.013049	0.934323	0.999711
ENSMUSG00000020456	Ogdh	0.00755681	0.966757	0.991223	0.283307	0.269235	0.539621	-0.110315	0.5429	0.999711
ENSMUSG00000020457	Drg1	0.245362	0.0886483	0.487522	0.167212	0.409795	0.675959	0.0206744	0.885252	0.999711
ENSMUSG00000020458	Rtn4	0.205887	0.308301	0.728036	-0.0499049	0.861326	0.944387	-0.00639972	0.974728	0.999711
ENSMUSG00000020459	Mtif2	-0.285011	0.0643484	0.428366	-0.173885	0.41907	0.683759	-0.0268253	0.858044	0.999711
ENSMUSG00000020460	Rps27a	-0.239738	0.349591	0.755493	-0.279257	0.427989	0.690698	0.0405083	0.868161	0.999711
ENSMUSG00000020462	Cfap36	0.330389	0.0746025	0.453225	0.376737	0.149147	0.387132	-0.0446459	0.808927	0.999711
ENSMUSG00000020463	Ppp4r3b	0.0925051	0.623585	0.891433	0.330458	0.215576	0.474118	0.0999807	0.595302	0.999711
ENSMUSG00000020464	Pnpt1	-0.084015	0.723356	0.922773	-0.448155	0.180668	0.431037	0.416084	0.0755488	0.999711
ENSMUSG00000020467	Efemp1	-0.42038	0.262507	0.691675	-0.348224	0.526432	0.761847	-0.159107	0.674365	0.999711
ENSMUSG00000020471	Pold2	0.175191	0.467837	0.823651	0.437234	0.196538	0.452485	-0.0782373	0.748269	0.999711
ENSMUSG00000020472	Zkscan17	0.378759	0.110459	0.515207	0.0685726	0.839722	0.935999	0.379436	0.111727	0.999711
ENSMUSG00000020473	Aebp1	0.0730041	0.868707	0.963129	0.573067	0.372147	0.642235	-0.0423013	0.925596	0.999711
ENSMUSG00000020474	Polm	-0.191925	0.453384	0.814527	0.661988	0.0659814	0.235363	0.0360117	0.882072	0.999711
ENSMUSG00000020475	Pgam2	0.0804563	0.710171	0.919214	0.707884	0.01796	0.0970713	-0.0850505	0.687906	0.999711
ENSMUSG00000020476	Dbnl	-0.147175	0.353235	0.756983	-0.066955	0.763327	0.902132	-0.0468469	0.765338	0.999711
ENSMUSG00000020477	Mrps24	-0.413453	0.112501	0.518771	0.222879	0.540572	0.772685	-0.130135	0.614477	0.999711
ENSMUSG00000020482	Ccdc117	0.0234399	0.916473	0.977896	-0.126113	0.688946	0.865374	-0.0286995	0.896209	0.999711
ENSMUSG00000020483	Dynll2	-0.187254	0.445302	0.809438	0.955853	0.00594607	0.0424151	-0.224907	0.359426	0.999711
ENSMUSG00000020484	Xbp1	0.0660293	0.803941	0.946218	0.449534	0.232206	0.495726	-0.236814	0.374022	0.999711
ENSMUSG00000020485	Supt4a	0.0381937	0.852331	0.958874	-0.0521499	0.856521	0.943038	-0.0323193	0.873985	0.999711
ENSMUSG00000020486	2018-09-04	-0.155483	0.300941	0.721457	-0.142725	0.502556	0.748484	-0.075449	0.616031	0.999711
ENSMUSG00000020491	2810021J22Rik	-0.00885675	0.960212	0.989348	0.414157	0.0903739	0.287061	0.0778484	0.635804	0.999711
ENSMUSG00000020492	Ska2	-0.0477288	0.787713	0.940829	0.608344	0.0138754	0.0806703	-0.102513	0.550341	0.999711
ENSMUSG00000020495	Smg8	0.102814	0.55365	0.864129	0.0366184	0.88055	0.952946	0.0227666	0.895407	0.999711
ENSMUSG00000020496	Rnf187	-0.0261362	0.885359	0.969007	0.330884	0.196752	0.452636	-0.122493	0.499419	0.999711
ENSMUSG00000020513	Tubd1	-0.30887	0.30398	0.724513	-0.746796	0.0740987	0.253327	-0.236898	0.409835	0.999711
ENSMUSG00000020514	Mrpl22	0.125158	0.545356	0.860305	0.0857135	0.766152	0.903704	0.174753	0.389832	0.999711
ENSMUSG00000020515	Cnot8	0.279113	0.0615754	0.42164	0.158264	0.451702	0.709142	0.142721	0.335831	0.999711
ENSMUSG00000020516	Rps6kb1	0.141586	0.288657	0.711986	0.0757955	0.68628	0.864105	0.0362197	0.782525	0.999711
ENSMUSG00000020519	Sap30l	0.451604	0.119178	0.526231	0.678751	0.096963	0.299321	0.29812	0.305675	0.999711
ENSMUSG00000020520	Galnt10	0.275965	0.29246	0.713669	0.426172	0.263854	0.533016	0.588925	0.0303166	0.999711
ENSMUSG00000020521	Rnft1	0.295223	0.156235	0.583045	0.552469	0.0605581	0.22368	0.114339	0.577639	0.999711
ENSMUSG00000020522	Mfap3	-0.236562	0.327642	0.739605	-0.0825738	0.809358	0.923658	-0.0972971	0.686725	0.999711
ENSMUSG00000020523	Fam114a2	-0.4846	0.00208797	0.101476	0.179727	0.415705	0.681196	-0.128133	0.407943	0.999711
ENSMUSG00000020524	Gria1	-0.105493	0.580161	0.873773	0.657798	0.0148559	0.0850062	0.134942	0.479369	0.999711
ENSMUSG00000020525	Ppm1d	0.425913	0.0259764	0.305842	0.802409	0.00248287	0.0216661	0.0521712	0.77544	0.999711
ENSMUSG00000020526	Znhit3	0.24264	0.293806	0.714799	0.0194125	0.952186	0.980575	0.218828	0.338292	0.999711
ENSMUSG00000020527	Myo19	-0.787951	0.0523086	0.404196	-0.662014	0.252655	0.51912	-0.0221302	0.95433	0.999711
ENSMUSG00000020528	Prpsap2	-0.0751452	0.647991	0.897572	0.395962	0.0797759	0.266263	-0.201976	0.200884	0.999711
ENSMUSG00000020530	Ggnbp2	0.310887	0.0120879	0.22412	0.0491457	0.778331	0.909879	0.162334	0.187954	0.999711
ENSMUSG00000020532	Acaca	-0.0227941	0.922715	0.979184	-0.172627	0.607741	0.818201	-0.0408256	0.863729	0.999711
ENSMUSG00000020534	Shmt1	0.32716	0.257237	0.686846	0.783103	0.0550697	0.21043	0.539332	0.0601886	0.999711
ENSMUSG00000020536	Llgl1	0.0929445	0.663841	0.902487	0.085424	0.779982	0.910249	-0.173709	0.419168	0.999711
ENSMUSG00000020537	Drg2	0.346838	0.0293725	0.323366	0.171575	0.443496	0.702577	0.105877	0.502509	0.999711
ENSMUSG00000020538	Srebf1	-0.23528	0.407509	0.788518	-0.267334	0.521517	0.759658	-0.123838	0.671059	0.999711
[truncated: 12,059 more rows]
